# Supplementary material for: Effect of pasta in the context of low-glycaemic index dietary patterns on body weight and markers of adiposity: a systematic review and meta-analysis of randomised controlled trials in adults
Source: PubMed Central journal article supplement — BMJ Open. 2018 Apr 2;8(3):e019438. doi: 10.1136/bmjopen-2017-019438 (PMC5884373; doi:10.1136/bmjopen-2017-019438), 2018-04-02
Supplement: bmjopen-2017-019438.draft_revisions.pdf [file bmjopen-2017-019438.draft_revisions.pdf]

# BMJ Open

BMJ Open is committed to open peer review. As part of this commitment we make the peer review history of every article we publish publicly available.

When an article is published we post the peer reviewers' comments and the authors' responses online. We also post the versions of the paper that were used during peer review. These are the versions that the peer review comments apply to.

The versions of the paper that follow are the versions that were submitted during the peer review process. They are not the versions of record or the final published versions. They should not be cited or distributed as the published version of this manuscript.

BMJ Open is an open access journal and the full, final, typeset and author-corrected version of record of the manuscript is available on our site with no access controls, subscription charges or pay-per-view fees (<http://bmjopen.bmj.com>).

If you have any questions on BMJ Open's open peer review process please email [editorial.bmjopen@bmj.com](mailto:editorial.bmjopen@bmj.com)

# BMJ Open

## Effect of Pasta in the Context of Low Glycemic Index Dietary Patterns on Body Weight and Markers of Global Adiposity: A Systematic Review and Meta-analysis of Randomized Controlled Trials in Adults

|                                 |                                                                                                                                                                                                                                                                                                                                                                                                                                                                                                                                                                                                                                                                                                                                                                                                                                                                                                                                                                                                |
|---------------------------------|------------------------------------------------------------------------------------------------------------------------------------------------------------------------------------------------------------------------------------------------------------------------------------------------------------------------------------------------------------------------------------------------------------------------------------------------------------------------------------------------------------------------------------------------------------------------------------------------------------------------------------------------------------------------------------------------------------------------------------------------------------------------------------------------------------------------------------------------------------------------------------------------------------------------------------------------------------------------------------------------|
| Journal:                        | <i>BMJ Open</i>                                                                                                                                                                                                                                                                                                                                                                                                                                                                                                                                                                                                                                                                                                                                                                                                                                                                                                                                                                                |
| Manuscript ID                   | bmjopen-2017-019438                                                                                                                                                                                                                                                                                                                                                                                                                                                                                                                                                                                                                                                                                                                                                                                                                                                                                                                                                                            |
| Article Type:                   | Research                                                                                                                                                                                                                                                                                                                                                                                                                                                                                                                                                                                                                                                                                                                                                                                                                                                                                                                                                                                       |
| Date Submitted by the Author:   | 31-Aug-2017                                                                                                                                                                                                                                                                                                                                                                                                                                                                                                                                                                                                                                                                                                                                                                                                                                                                                                                                                                                    |
| Complete List of Authors:       | Chiavaroli, Laura; St. Michael's Hospital, Toronto 3D Knowledge Synthesis and Clinical Trials Unit; University of Toronto, Nutritional Sciences<br>Kendall, Cyril; University of Toronto, Nutritional Sciences<br>Braunstein, Catherine; University of Toronto, Nutritional Sciences; St. Michael's Hospital, Toronto 3D Knowledge Synthesis and Clinical Trials Unit<br>Blanco Mejia, Sonia; Clinical Nutrition and Risk Factor Modification Centre, St. Michael's Hospital; Toronto 3D Knowledge Synthesis and Clinical Trials Unit, St. Michael's Hospital<br>Leiter, Lawrence; St. Michael's Hospital, Endocrinology; University of Toronto, Nutritional Sciences<br>Jenkins, David; St. Michael's Hospital, Clinical Nutrition and Risk Factor Modification Center; University of Toronto, Nutritional Sciences<br>Sievenpiper, John; McMaster University, Department of Pathology and Molecular Medicine; St. Michael's Hospital, Clinical Nutrition and Risk Factor Modification Centre |
| <b>Primary Subject Heading</b>: | Nutrition and metabolism                                                                                                                                                                                                                                                                                                                                                                                                                                                                                                                                                                                                                                                                                                                                                                                                                                                                                                                                                                       |
| Secondary Subject Heading:      | Cardiovascular medicine                                                                                                                                                                                                                                                                                                                                                                                                                                                                                                                                                                                                                                                                                                                                                                                                                                                                                                                                                                        |
| Keywords:                       | body weight, pasta, glycemic index, glycaemic index, systematic review and meta-analysis, weight loss                                                                                                                                                                                                                                                                                                                                                                                                                                                                                                                                                                                                                                                                                                                                                                                                                                                                                          |
|                                 |                                                                                                                                                                                                                                                                                                                                                                                                                                                                                                                                                                                                                                                                                                                                                                                                                                                                                                                                                                                                |

SCHOLARONE™  
Manuscripts

1  
2  
3 1 **Effect of Pasta in the Context of Low Glycemic Index Dietary Patterns on Body Weight**  
4 **and Markers of Global Adiposity: A Systematic Review and Meta-analysis of Randomized**  
5 **Controlled Trials in Adults**  
6  
7

8 4 Laura Chiavaroli<sup>1,2</sup>, Cyril WC Kendall<sup>1,2,3</sup>, Catherine R Braunstein<sup>1,2</sup>, Sonia Blanco Mejia<sup>1,2</sup>,  
9 5 Lawrence A Leiter<sup>1,2,4-6</sup>, David JA Jenkins<sup>1,2,4-6</sup>, John L Sievenpiper<sup>1,2,4-6</sup>

10 6 1 Department of Nutritional Sciences, University of Toronto, Toronto, Canada

11 7 2 Toronto 3D Knowledge Synthesis and Clinical Trials Unit, St. Michael's Hospital, Toronto,  
12 8 Canada

13 9 3 College of Pharmacy and Nutrition, University of Saskatchewan, Saskatoon, Canada

14 10 4 Department of Medicine, University of Toronto, Toronto, Canada

15 11 5 Li Ka Shing Knowledge Institute, St. Michael's Hospital, Toronto, Canada

16 12 6 Division of Endocrinology and Metabolism, St. Michael's Hospital, Toronto, Canada

17 13

18 14 Corresponding Author:

19 15 Dr. John L Sievenpiper, MD, PhD, FRCPC, St. Michael's Hospital, #6137-61 Queen Street East,  
20 16 Toronto, ON, M5C 2T2, CANADA

21 17 Telephone: +1 416 867 7475; Fax: +1 416 867 7495; Email: [john.sievenpiper@utoronto.ca](mailto:john.sievenpiper@utoronto.ca)

22 18

23 19 Word Count: 4,816

24 20 Tables: 1

25 21 Figures: 3

26 22 Online only supplementary material included

27 23

28 24 **Keywords:** body weight, pasta, glycemic index, glycaemic index, systematic review and meta-  
29 25 analysis, weight loss

30 26

31 27

32 28

1  
2  
3 **29 ABSTRACT**  
4

5 **30 Objective:** Carbohydrates have been implicated in the epidemic of obesity. To assess the effect  
6  
7  
8 **31** of pasta alone or pasta in the context of low glycemic index (GI) dietary patterns on adiposity,  
9  
10 **32** we conducted a systematic review and meta-analysis.  
11

12  
13 **33**  
14 **34 Design:** Systematic review and meta-analysis of randomized controlled trials (RCTs) with  
15  
16  
17 **35** GRADE assessment.  
18

19 **36**  
20  
21 **37 Eligibility criteria for selecting studies:** MEDLINE, Embase, CINAHL, and the Cochrane  
22  
23  
24 **38** Library were searched through 07 February 2017. We included RCTs of  $\geq 3$ -weeks assessing the  
25  
26 **39** effect of pasta alone or pasta in the context of low-GI dietary patterns on measures of global  
27  
28 **40** (body weight, BMI, body fat) and regional (waist circumference [WC], waist-to-hip ratio  
29  
30 **41** [WHR], sagittal abdominal diameter [SAD]) adiposity in adults. Two independent reviewers  
31  
32 **42** extracted data and assessed risk of bias. Data were pooled using the generic inverse-variance  
33  
34 **43** method and expressed as mean differences (MDs) with 95% confidence intervals (95% CIs).  
35  
36 **44** Heterogeneity was assessed (Cochran Q statistic) and quantified (I<sup>2</sup>-statistic). GRADE assessed  
37  
38 **45** the overall quality of the evidence.  
39  
40  
41  
42  
43

44 **47 Results:** We identified no trials of the effect of pasta alone and 32 trial comparisons (n=2,448  
45  
46 **48** participants) of the effect of pasta in the context of low-GI dietary patterns. Pasta in the context  
47  
48 **49** of low-GI dietary patterns significantly reduced body weight (MD=-0.63kg [95% CIs, -0.84, -  
49  
50 **50** 0.42kg]) and BMI (MD=-0.26kg/m<sup>2</sup> [95% CIs, -0.36, -0.16kg/m<sup>2</sup>]) compared with higher-GI  
51  
52 **51** dietary patterns. There was no effect on other measures of adiposity. The evidence was graded as  
53  
54  
55  
56  
57  
58  
59  
60

52 moderate for body weight, BMI, WHR, and SAD owing to a downgrade for indirectness and low  
53 for WC and body fat owing to downgrades for indirectness and inconsistency.

54  
55 **Conclusions:** The available RCTs demonstrate that pasta in the context of low-GI dietary  
56 patterns does not adversely affect adiposity. Future trials should assess the effect of pasta in the  
57 context of other healthy dietary patterns.

58  
59 **Protocol registration:** ClinicalTrials.gov Identifier, NCT02961088

#### 60 61 62 **Strengths and limitations of this study**

- 63 - The present systematic review and meta-analysis was based on a comprehensive search  
64 and include a large number of randomized controlled trials which provide the best  
65 protection against bias
- 66 - We used the Grading of Recommendations Assessment, Development, and Evaluation  
67 (GRADE) system to evaluate the strength and quality of the evidence.
- 68 - There was evidence of unexplained inconsistency in the treatment estimates across trials  
69 for waist circumference and body fat.
- 70 - The generalizability of our results is questionable with evidence of indirectness in the  
71 pooled estimates for all body and adiposity outcomes, as all of the trials assessed pasta in  
72 the context of low-GI dietary patterns (no trials assessed the effect of pasta alone or in the  
73 context of other dietary patterns) and most of the available trials did not quantify the  
74 amount of pasta consumed.

## INTRODUCTION

As the role of saturated fat in chronic disease has been called into question, carbohydrates have come under attack in the media<sup>1,2</sup>, popular books<sup>3-9</sup>, statements of health advocacy groups<sup>10</sup> and commentaries in leading medical journals<sup>11,12</sup>. Much of the attention has focused on sugars but traditional carbohydrate staples like pasta, rice, and breads are increasingly being implicated in the epidemics of overweight and obesity<sup>1,7</sup>. Although advantages for weight related outcomes have been shown for dietary patterns that are high in these foods but low in glycemic index (GI)<sup>13,14</sup>, high in whole grains<sup>15,16</sup>, and/or high in dietary fibre<sup>17,18</sup>, there has been a general lack of recognition of the importance of carbohydrate quality.

Pasta is an important example of a food which is considered a refined carbohydrate but has a low-GI, a property that has been exploited extensively in studies of low-GI dietary patterns. It remains unclear whether pasta alone or in the context of a low-GI dietary pattern contributes to weight gain. We undertook a systematic review and meta-analysis of randomized controlled trials (RCTs) with a full GRADE assessment to quantify the effect of pasta alone or in the context of low-GI dietary patterns on body weight and measures of adiposity relevant to the prevention and management of overweight and obesity.

## METHODS

### Design

Our protocol followed the guideline of the Cochrane Handbook for Systematic Reviews of Interventions<sup>19</sup>, and findings are reported according to the guidelines of the Preferred Reporting

1  
2  
3 97 Items for Systematic Reviews and Meta-Analyses<sup>20</sup>. The protocol is registered at  
4  
5 98 clinicaltrials.gov (identifier, NCT02961088).  
6  
7  
8 99

## 10 **Data sources and searches**

11  
12 101 We searched MEDLINE (<http://www.nlm.nih.gov/bsd/pmresources.html>), Embase  
13  
14 102 (<https://www.embase.com>), CINAHL (<https://health.ebsco.com/products/the-cinahl-database>),  
15  
16 103 and the Cochrane Library (<http://www.cochranelibrary.com/>) through 07 February 2017. The full  
17  
18 104 search terms used in this study are presented in **Supplemental Tables S1-S2**. Briefly, we  
19  
20 105 searched using variations of the terms pasta and glycemic index and glycemic load and body  
21  
22 106 weight and BMI. The search was limited to human studies and had no language restrictions.  
23  
24 107 Reference lists of selected studies and reviews were also searched to identify additional articles.  
25  
26 108

## 30 **Study selection**

31  
32 110 We include RCTs that investigated the effect of pasta consumed alone or in the context of low-  
33  
34 111 GI dietary patterns that emphasized pasta in comparison with higher GI diets that did not include  
35  
36 112 pasta on body weight or other measures of global (BMI, body fat) or abdominal (waist  
37  
38 113 circumference, waist-to-hip ratio, sagittal abdominal diameter, or visceral adipose tissue assessed  
39  
40 114 by imaging modalities) adiposity in participants of all health backgrounds. Trials were excluded  
41  
42 115 if they had diet duration of <3 weeks, did not intend to use a calorie- and macronutrient-matched  
43  
44 116 comparator arm that was higher in GI; included pregnant or breast-feeding women or children; or  
45  
46 117 did not provide suitable end-point data. When multiple publications existed for the same study,  
47  
48 118 the article with the most information was included (n=6). Published abstracts were not included.  
49  
50  
51  
52  
53  
54 119

## 120 **Data extraction**

121 Two reviewers (LC, CB) assessed the titles and abstracts of all identified studies and  
122 independently reviewed and extracted relevant data from each report, including study design,  
123 blinding, sample size, participant characteristics, follow-up duration, identification of pasta in the  
124 low-GI diet only, comparator diet, macronutrient profile, funding source, and outcome data. The  
125 primary outcome was body weight, and secondary outcomes included markers of global (BMI,  
126 body fat) and abdominal (waist circumference, waist-to-hip ratio, sagittal abdominal diameter, or  
127 visceral adipose tissue assessed by imaging modalities) adiposity. Mean±SD differences between  
128 test and control arms were extracted for each outcome.

129 In those trials where the data were included in figures and not provided numerically, we used the  
130 software program Plot Digitizer (<http://plotdigitizer.sourceforge.net/>) to extract the data.

131 Additional information was requested from the authors of all included trials. Disagreement were  
132 resolved by consensus or where necessary by a third author (SBM).

133

## 134 **Risk of bias assessment**

135 Risk of bias for each individual study was assessed using the Cochrane Risk of Bias tool<sup>19</sup>. The  
136 level of bias was evaluated for sequence generation, allocation concealment, blinding,  
137 incomplete outcome data, and selective reporting and determined overall as either low (proper  
138 methods taken to reduce bias), high (improper methods creating bias), or unclear (insufficient  
139 information provided to determine the bias level).

140

## 141 **Statistical analysis**



1  
2  
3 142 Baseline, end-of-study, and between-treatment differences in body weight, BMI, waist  
4  
5 143 circumference, body fat, waist-to-hip ratio, sagittal abdominal diameter or visceral adipose tissue  
6  
7 144 assessed by imaging modalities were recorded as means±SDs. If not provided, between-  
8  
9 145 treatment differences in change-from-baseline or end differences were calculated by subtracting  
10  
11 146 means and variance measures such as SEs were imputed with the use of published formulas<sup>19</sup>.  
12  
13 147 Missing SDs were imputed with the use of the pooled SD from other studies included in the  
14  
15 148 analysis<sup>19</sup>.  
16  
17 149 Data analyses were conducted using Review Manager version 5.3 (RevMan) (Copenhagen,  
18  
19 150 Denmark: The Nordic Cochrane Centre, The Cochrane Collaboration, 2014) for primary  
20  
21 151 analyses and Stata version 13 (College Station, TX: StataCorp LP) for subgroup analyses. A  
22  
23 152 generic inverse-variance method with random-effects models was used to calculate pooled mean  
24  
25 153 differences and 95% confidence intervals (CIs). Random-effects models were used even in the  
26  
27 154 absence of statistically significant inter-study heterogeneity, as they yield more conservative  
28  
29 155 summary effect estimates in the presence of residual heterogeneity. Change-from-baseline  
30  
31 156 differences were preferred over end differences and paired analyses were applied to all crossover  
32  
33 157 trials with the use of a within-individual correlation coefficient between treatments of 0.5 as  
34  
35 158 described by Elbourne et al.<sup>21</sup>  
36  
37 159 Inter-study heterogeneity was assessed by the Cochran Q statistic, where  $P < 0.10$  was considered  
38  
39 160 statistically significant, and quantified by the  $I^2$  statistic, where  $I^2 \geq 50\%$  indicates substantial  
40  
41 161 heterogeneity<sup>19</sup>. Sensitivity analysis were performed which included the removal of each single  
42  
43 162 study from the meta-analyses one at a time and recalculation of the summary effect. An  
44  
45 163 influential outlier was considered a study whose removal changed the magnitude of the pooled  
46  
47 164 effect by  $>10\%$ . Sensitivity analysis were also conducted using different correlation coefficient  
48  
49  
50  
51  
52  
53  
54  
55  
56  
57  
58  
59  
60

1  
2  
3 165 values for crossover trials (0.25 and 0.75) to test for the robustness of the effect size, conducting  
4  
5 166 analyses using fixed effects models and restricting analyses to those trials for which pasta intake  
6  
7  
8 167 could be quantified.

9  
10 168 If  $\geq 10$  trial comparisons were available, then sources of heterogeneity were explored by  
11  
12 169 subgroup analyses. A priori categorical subgroups analyses were assessed by meta-regression  
13  
14 170 analyses. These included patient type (normal body weight, overweight or obese [average  
15  
16 171 baseline BMI  $>27\text{kg/m}^2$ ]), diabetes, coronary heart disease), follow-up ( $<24$ -weeks,  $\geq 24$  weeks),  
17  
18 172 baseline BMI (BMI  $\leq 30$ ,  $>30\text{kg/m}^2$ ), design (parallel, crossover), energy balance (negative on  
19  
20 173 both arms [weight loss diets], neutral on both arms [weight maintaining diets]) and dose of pasta  
21  
22 174 (based on the median). A priori categorical subgroup analyses also included the following dietary  
23  
24 175 factors: GI (absolute level [ $\leq 55$ ,  $>55$ ; glucose scale], within-treatment change, between-treatment  
25  
26 176 change), fat intake (absolute level [ $<30\%$ ,  $\geq 30\%$  energy], within-treatment change, between-  
27  
28 177 treatment change), carbohydrate intake (absolute level [ $<50\%$ ,  $\geq 50\%$  energy], within-treatment  
29  
30 178 change, between-treatment change), protein intake (absolute level [ $<20\%$ ,  $\geq 20\%$  energy], within-  
31  
32 179 treatment change, between-treatment change), dietary fibre intake (absolute level [ $<28\text{g/day}$ ,  
33  
34  $\geq 28\text{g/day}$ ], within-treatment change, between-treatment change), and risk of bias. A priori  
35  
36 180 continuous meta-regression analyses were conducted on the absolute levels and within- and  
37  
38 181 between-treatment changes of these same dietary factors in the intervention arms of pasta in the  
39  
40 182 context of low-GI dietary patterns. Linear and non-linear pasta intake dose-response analyses  
41  
42 183 were assessed by using continuous meta-regression analyses and spline curve modeling  
43  
44 184 (MKSPLINE procedure), respectively. Publication bias was assessed by visual inspection of  
45  
46 185 funnel plots and the Egger<sup>22</sup> and Begg<sup>23</sup> tests, when  $\geq 10$  trial comparisons were available. If  
47  
48  
49  
50  
51  
52 186

1  
2  
3 187 publication bias was suspected, then adjustment for funnel plot asymmetry was done by imputing  
4  
5 188 missing study data using the Duval and Tweedie trim and fill method <sup>24</sup>.  
6  
7

8 189

## 10 190 **Grading the evidence**

11  
12 191 The grading of recommendations assessment, development, and evaluation (GRADE) approach  
13  
14 192 was used to assess the confidence in the pooled effect estimates by assessing the overall quality  
15  
16 193 and strength of the evidence <sup>25</sup>. Evidence was graded as high, moderate, low or very low quality.  
17  
18 194 The included RCTs were graded as high quality evidence by default and downgraded based on  
19  
20 195 pre-specified criteria. Criteria to downgrade evidence included risk of bias (weight of studies  
21  
22 196 show risk of bias assessed by the Cochrane Risk of Bias tool), inconsistency (substantial  
23  
24 197 unexplained heterogeneity,  $I^2 > 50\%$ ,  $P < 0.01$ ), indirectness (presence of factors that limited the  
25  
26 198 generalizability of the results), imprecision (the 95% CI for effect estimates were wide or crossed  
27  
28 199 pre-specified minimally important differences [MIDs] for harm), and publication bias  
29  
30  
31 200 (significant evidence of small-study effects).  
32  
33  
34

35 201

## 38 202 **Patient involvement**

39  
40  
41 203 No patients were directly involved in the development of the research question, selection of the  
42  
43 204 outcome measures, design and implementation of the study, or interpretation of the results.  
44  
45

46 205

## 48 206 **RESULTS**

49  
50  
51 207

### 53 208 **Search results**

54

55

56

57

58

59

60

209 **Figure 1** shows the flow of the literature. We identified 4876 reports of which 29 met eligibility  
210 criteria. No reports were identified that assessed the effect of pasta alone, while 29 reports  
211 (including 32 trial comparisons involving 2448 participants) were identified that assessed the  
212 effect of pasta in the context of low-GI dietary patterns on any adiposity outcome in adults<sup>26-54</sup>.  
213 Of the 32 trial comparisons that assessed the effect of pasta in the context of a low-GI dietary  
214 pattern, there were 32 trial comparisons for body weight, 18 trial comparisons for BMI<sup>27,28,31-  
215 33,35,36,39-41,43-46,48,49,52,53</sup>, 18 trial comparisons for waist circumference<sup>27,28,31,33,34,36,38-40,42,44-47,52,53</sup>,  
216 10 trial comparisons for body fat<sup>27,28,31-33,36,38,41,43,53</sup>, 6 trial comparisons for waist-to-hip  
217 ratio<sup>31,39,40,44,45,52</sup>, and 3 trial comparisons for sagittal abdominal diameter<sup>34,39</sup>. There was only  
218 one trial comparison identified<sup>35</sup> for visceral adipose tissue assessed by imaging modalities, thus  
219 a meta-analysis could not be undertaken for this outcome.

### 221 **Trial characteristics**

222 **Table 1** and **Supplemental Table S3** show the characteristics of all included trials of the effect  
223 of pasta in the context of low-GI dietary patterns. The majority of trials had a parallel design  
224 (26/32) with a median follow-up of 12 weeks (IQR: 9–21 weeks) and a median number of  
225 participants per trial of 43 (IQR: 21–112). Most participants were middle aged (median age: 50  
226 y; IQR: 40-58 y) men and women (median ratio of men to women: 0.4:1 in available trials). The  
227 median baseline BMI across studies was 30.4kg/m<sup>2</sup> (IQR: 28.2–32.0). Regarding metabolic  
228 phenotype, 21 (66%) trials included participants who were overweight or obese (had a baseline  
229 BMI $\geq$ 27kg/m<sup>2</sup>), 10 (31%) had diabetes and one trial (3%) with coronary heart disease (CHD).  
230 We did not retrieve any trials where participants had a normal BMI at baseline ( $\leq$ 25kg/m<sup>2</sup>),

1  
2  
3 231 although 6 trials did not include BMI >25 kg/m<sup>2</sup> as part of criteria, the average baseline BMI was  
4  
5 232 ≥27 kg/m<sup>2</sup>, therefore categorized as overweight.  
6  
7

8 233

9  
10 234 **Risk of bias**

11  
12 235 **Supplemental Figures S1 and S2** show the individual Cochrane Risk of Bias tool assessments  
13  
14 236 for each of the included trials of the effect of pasta in the context of low-GI dietary patterns. No  
15  
16 237 serious risk of bias was detected.  
17  
18

19 238

20  
21 239 **Effect of Pasta in the Context of Low-GI dietary patterns and Body Weight**

22  
23 240 **Figure 2** shows the effect of pasta in the context of low-GI dietary patterns on the primary  
24  
25 241 outcome body weight. Pooled analyses showed pasta in the context of low-GI dietary patterns  
26  
27 242 had the effect of reducing body weight by -0.63 kg (95% CI:-0.84, -0.42 kg; P<0.001) compared  
28  
29 243 with higher GI control diets with no evidence of heterogeneity (I<sup>2</sup>=0%, P-heterogeneity=0.51).  
30  
31

32 244

33  
34 245 **Effect of Pasta in the Context of Low-GI dietary patterns on Markers of Global Adiposity**

35  
36 246 **Figure 3 and Supplemental Figure S3-S4** show the effect of pasta in the context of low-GI  
37  
38 247 dietary patterns on markers of global adiposity. Pooled analyses showed that pasta in the context  
39  
40 248 of low-GI dietary patterns had the effect of reducing BMI by -0.26kg/m<sup>2</sup> (n=18 trials; MD=-  
41  
42 249 0.26kg/m<sup>2</sup>; 95% CI:-0.36, -0.16 kg/m<sup>2</sup>; P<0.001) compared with higher GI control diets with no  
43  
44 250 evidence of heterogeneity (I<sup>2</sup>=0%, P-heterogeneity=0.90). There was no effect on body fat (n=10  
45  
46 251 trials; MD=-0.01%, 95% CI:-0.58, 0.56%; P=0.98) with evidence of substantial heterogeneity  
47  
48 252 (I<sup>2</sup>=65%, P<0.01).  
49  
50  
51  
52

53 253  
54  
55  
56  
57  
58  
59  
60

1  
2  
3 254 **Effect of Pasta in the Context of Low-GI dietary patterns on Markers of Abdominal**  
4  
5 255 **Adiposity**

6  
7 256 **Figure 3 and Supplemental Figures S5-S7** show the pooled estimates for the markers of  
8  
9  
10 257 abdominal adiposity. Pooled analyses did not show a significant effect of pasta in the context of  
11  
12 258 low-GI dietary patterns compared with higher-GI control diets on waist circumference (n=18  
13  
14 259 trials; MD=-0.46cm, 95% CI:-1.05, 0.14cm; P=0.13), waist-to-hip ratio (n=6 trials; MD=-0.00,  
15  
16 260 95% CI:-0.01, 0.00; P=0.27), or sagittal abdominal diameter (n=3 trials, MD=-0.09cm, 95% CI:-  
17  
18 261 0.34, 0.16cm; P=0.48) There was only evidence of substantial heterogeneity in the analyses for  
19  
20 262 waist circumference ( $I^2=62%$ , P-heterogeneity<0.01).  
21  
22  
23  
24 263

25  
26 264 **Sensitivity analyses**

27  
28 265 We conducted four sets of sensitivity analyses (**Supplemental Tables S4-5, Supplemental**  
29  
30 266 **Figures S8-9**). The systematic removal of each trial did not modify the direction or significance  
31  
32 267 of the effect estimates or the evidence of heterogeneity for any of the outcomes with the  
33  
34 268 exception of waist circumference (**Supplemental Table S4**). In the sensitivity analysis for waist  
35  
36 269 circumference, two studies were influential outliers in that their removal altered the magnitude of  
37  
38 270 the pooled effect in the remaining studies by >10%, where the removal of the studies of  
39  
40 271 McMillan-Price et al. (high protein comparison)<sup>42</sup> and Jenkins et al.<sup>44</sup> rendered the results for  
41  
42 272 waist circumference statistically significant (MD= -0.62cm; 95% CI: -1.19, -0.05; P=0.03) and  
43  
44 273 (MD= -0.61cm; 95% CI: -1.18, -0.04; P=0.04), respectively; forest plots not shown).  
45  
46 274 Heterogeneity remained significant in both cases ( $I^2= 55%$ , P-heterogeneity <0.01 and  $I^2=50%$ ,  
47  
48 275 P-heterogeneity= 0.01, respectively). Sensitivity analyses using correlation coefficients of 0.25  
49  
50 276 and 0.75 for paired analyses of crossover trials also did not modify the results (**Supplemental**  
51  
52  
53  
54  
55  
56  
57  
58  
59  
60

1  
2  
3 277 **Table S5**). In the sensitivity analyses where fixed effects models were applied (**Supplemental**  
4  
5 278 **Figure S8**), the direction, magnitude and significance of the pooled estimates were very similar  
6  
7  
8 279 to those produced by the random effects models with the exception of the sensitivity analysis for  
9  
10 280 waist circumference which was significant (MD= -0.62; 95% CI: -0.93, -0.32; P<0.001). Finally,  
11  
12 281 restricting analyses to the 11 trials for which pasta intake could be quantified (median pasta  
13  
14 282 intake, 3.33 servings/week [range, 1.75 – 7 servings/week]) showed a similar reduction in body  
15  
16 283 weight (MD= -0.70 kg; 95% CI:-1.10, -0.29 kg; P<0.001) when pasta was consumed in the  
17  
18 284 context of low-GI dietary patterns compared with the higher GI control arms without evidence of  
19  
20 285 heterogeneity ( $I^2=0\%$ , P-heterogeneity=0.68) (**Supplemental Figure S9**).  
21  
22  
23  
24 286

### 26 287 **Subgroup analyses**

28 288 We were only able to conduct a priori categorical and continuous subgroup analyses for body  
29  
30 289 weight, BMI, body fat and waist circumference. Subgroup analyses for waist-to-hip ratio and  
31  
32 290 sagittal abdominal diameter could not be assessed, owing to <10 trial comparisons in each case.  
33  
34 291 **Supplemental Figures S10-S12** show the categorical a priori subgroup analyses for body  
35  
36 292 weight. There was no evidence of significant effect modification in any of the subgroup analyses  
37  
38 293 for body weight, including no effect modification of follow-up when comparing studies less than  
39  
40 294 24 weeks duration to those greater than or equal to 24 weeks (-0.63kg vs -0.57kg, respectively)  
41  
42 295 (**Supplemental Figure S10**). Neither was there evidence of significant effect modification in any  
43  
44 296 of the subgroup analyses for BMI, body fat or waist circumference (**Supplemental Figures S13-**  
45  
46 297 **20**).  
47  
48  
49  
50  
51 298

1  
2  
3 299 **Supplemental Table S6** and **Supplemental Figures S21-22** show the continuous subgroup  
4  
5 300 analyses for body weight. There was evidence of significant effect modification by carbohydrate  
6  
7 301 and protein intake, where an increase in carbohydrate intake in the intervention group in which  
8  
9 302 pasta was consumed in the context of low-GI dietary patterns was associated with weight loss  
10  
11 303 ( $\beta = -0.07$ , 95% CI: -0.12, -0.01,  $I^2 = 0.00\%$ ,  $P = 0.02$ ), and an increase in protein intake in the  
12  
13 304 intervention group in which pasta was consumed in the context of low-GI dietary patterns was  
14  
15 305 associated with weight gain ( $\beta = 0.15$ , 95% CI: 0.03, 0.27,  $I^2 = 0.00\%$ ,  $P = 0.02$ ). None of the other  
16  
17 306 continuous subgroup analyses were significant. There was no evidence of significant effect  
18  
19 307 modification in any of the continuous subgroup analyses for BMI (**Supplemental Table S7**). For  
20  
21 308 body fat, there was evidence of significant effect modification in the continuous meta-regression  
22  
23 309 subgroup analysis of difference in GI between intervention and control groups, where greater  
24  
25 310 difference in GI between the groups was associated with greater reduction in body fat in the  
26  
27 311 intervention group ( $\beta = -0.09$ , 95% CI: -0.15, -0.03,  $I^2 = 19.39\%$ ,  $P = 0.01$ ) (**Supplemental Table**  
28  
29 312 **S8**). None of the other continuous subgroup analyses were significant. For waist circumference,  
30  
31 313 there was evidence of significant effect modification in the continuous meta-regression subgroup  
32  
33 314 analysis of absolute carbohydrate level and absolute protein level, where greater carbohydrate  
34  
35 315 level in the intervention group in which pasta was consumed in the context of low-GI dietary  
36  
37 316 patterns was associated with greater loss in waist circumference ( $\beta = -0.11$ , 95% CI: -0.19, -0.04,  
38  
39 317  $I^2 = 27.06\%$ ,  $P < 0.01$ ) and a lower protein level in the intervention group in which pasta was  
40  
41 318 consumed in the context of low-GI dietary patterns was associated with an increase in waist  
42  
43 319 circumference ( $\beta = 0.20$ , 95% CI: 0.01, 0.38,  $I^2 = 43.92\%$ ,  $P = 0.04$ ) (**Supplemental Table S9**).  
44  
45 320 None of the other continuous subgroup analyses were significant.  
46  
47  
48  
49  
50  
51  
52  
53  
54 321



1  
2  
3 322 **Dose-response analyses**  
4

5 323 **Supplemental Tables S6 and S10** and **Supplemental Figure S23** show the dose-response  
6  
7 324 analysis for the 11 trials for which pasta intake could be quantified. No evidence of a linear dose  
8  
9 325 response was seen for pasta intake by meta-regression analyses (**Supplemental Table S6**).  
10  
11 326 There was also no evidence of a non-linear dose response by MKSPLINE (p=0.85)  
12  
13 327 (**Supplemental Figure S23**) or piecewise linear meta-regression analyses (**Supplemental Table**  
14  
15 328 **S10**).  
16  
17  
18  
19  
20  
21

22 330 **Publication Bias**  
23

24 331 **Supplemental Figures S24-S27** shows the funnel plots for body weight, BMI, body fat and  
25  
26 332 waist circumference. There was no evidence of funnel-plot asymmetry. Formal testing with the  
27  
28 333 Egger and Begg tests did not show evidence of small-study effects (P>0.05 for both). Publication  
29  
30 334 bias was not assessed for waist-to-hip ratio and sagittal abdominal diameter, owing to <10 trial  
31  
32 335 comparisons.  
33  
34  
35  
36  
37

38 337 **GRADE Assessment**  
39

40 338 **Supplemental Table S11** shows a summary of the GRADE assessments for the effect of pasta in  
41  
42 339 the context of low-GI dietary patterns on body weight and measures of adiposity. The evidence  
43  
44 340 was graded as moderate for body weight, BMI, waist-to-hip ratio and sagittal abdominal  
45  
46 341 diameter owing to downgrades for indirectness and low for waist circumference and body fat,  
47  
48 342 owing to downgrades for indirectness and inconsistency ( $I^2=59%$ , P-heterogeneity<0.001;  
49  
50 343  $I^2=66%$ , P-heterogeneity<0.01, respectively).  
51  
52  
53  
54  
55  
56  
57  
58  
59  
60

## DISCUSSION

The present systematic review and meta-analysis quantified the effect of pasta alone and pasta in the context of low-GI dietary patterns on body weight and other markers of adiposity. We identified no trial comparisons for the effect of pasta alone and 32 trial comparisons involving 2448 participants who were predominantly middle-aged and overweight or obese for the effect of pasta in the context of low-GI dietary patterns. The primary pooled analysis demonstrated that pasta in the context of low-GI dietary patterns did not contribute to weight gain, resulting in a significant weight loss of -0.63 kg when compared to diets higher in GI over a median follow-up of 12 weeks. The lack of harm was reflected in the established clinical secondary outcome measures of global (BMI and body fat) and abdominal adiposity (waist circumference, waist-to-hip ratio and sagittal abdominal diameter). These findings were robust across subgroups. The findings did not differ by metabolic phenotype in those who were overweight or obese or had diabetes, which is noteworthy since these are populations who would benefit from weight management strategies. There was also no effect modification by the energy balance of the design such that the weight loss was seen even under conditions of neutral energy balance (in which participants were instructed to consume dietary advice ad libitum), suggesting that encouragement of the consumption of pasta in the context of a low-GI dietary patterns does not cause harm and may even lead to spontaneous weight loss. There was also no effect modification by follow-up either in continuous meta-regression or categorical, where the 24 trials with <24weeks follow-up had a weight reduction similar to those 8 trials with  $\geq 24$ weeks follow-up (-0.63kg vs -0.57kg, respectively). This is of relevance since many dietary studies are successful in demonstrating weight loss in the short term but not over the long term.

### 368 **Findings in the context of existing studies**

369 We are not aware of any RCTs directly assessing the effect of pasta intake on health  
370 parameters including body weight. Our findings, however, agree with earlier systematic reviews  
371 and meta-analyses of RCTs of the effect of low-GI dietary patterns irrespective of pasta intake  
372 on body weight and adiposity. The systematic review and meta-analysis by Thomas et al. in 2007  
373 found a significant -1.1kg weight loss and -1.3kg/m<sup>2</sup> reduction in BMI favouring low-GI or  
374 glycemic load (GL) diets compared to control diets in 6 RCTs of 5 weeks to 6 months in duration  
375 in overweight or obese individuals<sup>13</sup>. Another systematic review and meta-analysis by  
376 Schwingshackl et al. in 2013 found a -0.62kg weight loss favouring low-GI/GL diets compared  
377 to higher GI/GL diets in 14 RCTs with greater than 6 months duration in overweight individuals  
378 (BMI>25kg/m<sup>2</sup>)<sup>14</sup>.

379  
380 Our findings also agree with trials in which pasta was emphasized in the context of other healthy  
381 dietary patterns. One trial done in children in Spain given Mediterranean dietary advice which  
382 included increasing the intake of pasta found that approximately 11.3% of the participants in the  
383 Mediterranean diet group who were classified as overweight and obese changed their weight  
384 status to normal weight compared to only approximately 2.6% of the participants in the control  
385 group<sup>55</sup>.

386  
387 Other lines of evidence from observational studies have demonstrated benefits of pasta  
388 consumption on body weight and adiposity. Pasta intake was recently assessed in the Moli-sani  
389 study and the Italian Nutrition & Health Survey (INHES), a cross-sectional study of over  
390 20,000 Italians from all over Italy<sup>56</sup>. The study demonstrated that higher pasta consumption was

1  
2  
3 391 associated with lower BMI, waist circumference and waist-to-hip ratio and with a lower  
4  
5 392 prevalence of overweight and obesity<sup>56</sup>. Furthermore, greater pasta intake was associated with  
6  
7 393 better adherence to the Mediterranean diet, a dietary pattern which has a demonstrated  
8  
9 394 cardiovascular benefit<sup>57</sup>. Similar associations between greater pasta intake and lower body  
10  
11 395 weight have also been observed in prospective U.S. cohorts<sup>58</sup>. A pooled analysis of the 3  
12  
13 396 Harvard cohorts also showed that higher GI diets (which would preclude pasta) were associated  
14  
15 397 with weight gain<sup>59</sup>.  
16  
17  
18  
19 398

20  
21 399 Although the product form of pasta can vary widely, including in shape (e.g. macaroni, spaghetti,  
22  
23 400 linguine), ingredients (e.g. type of wheat, egg content), and processing technique (e.g. drying  
24  
25 401 temperature), studies have demonstrated that when comparing pastas varying in these  
26  
27 402 parameters, despite slight variations in glycemic response among pastas, glycemic responses are  
28  
29 403 still lower compared to a control, e.g. white bread<sup>60,61</sup>. One concern of the choice of pasta as a  
30  
31 404 carbohydrate food is that it is a refined food low in fibre. Although there are whole grain pasta  
32  
33 405 options available, studies have demonstrated that fiber added to pasta, does not significantly  
34  
35 406 affect the glucose or insulin response, the secretion of gut hormones or satiety<sup>62,63</sup>. Furthermore,  
36  
37 407 pasta has a similar glycemic response compared to many fiber-rich carbohydrates, including  
38  
39 408 barley, legumes and steel cut oats, and still a lower glycemic response compared to other fiber-  
40  
41 409 rich foods including whole wheat bread, breakfast cereals like bran flakes and potatoes with  
42  
43 410 skin<sup>64</sup>.  
44  
45  
46  
47  
48  
49 411

50  
51 412 The mechanism by which pasta in the context of low-GI dietary patterns lead to weight loss even  
52  
53 413 under conditions of ad libitum dietary advice is unclear. Lower GI diets may result in greater  
54  
55  
56  
57  
58  
59  
60

1  
2  
3 414 body weight reduction compared to higher GI diets because lower GI foods may be more  
4  
5 415 satiating<sup>65</sup> and have been shown to delay hunger and decrease subsequent energy intake<sup>13</sup>. Low-  
6  
7 416 GI dietary patterns are also characterized by high fiber content<sup>64,66</sup> which may also contribute to  
8  
9  
10 417 improvements in satiety and hunger<sup>17</sup>. Furthermore, studies which have compared ad libitum  
11  
12 418 low-GI dietary patterns to standard energy-restricted low-fat diets, demonstrated equivalency or  
13  
14 419 better weight loss when following the low-GI diet, despite the fact that they could eat as much as  
15  
16 420 they desired<sup>13,67</sup>. Thus, voluntary energy intake may be lower after low-GI meals, as has been  
17  
18 421 previously demonstrated<sup>68</sup>.

422

### 423 **Strengths and limitations**

424 The strengths of the present systematic review and meta-analysis include that it is  
425 comprehensive, includes RCTs which protects against bias and uses GRADE to evaluate the  
426 quality of evidence. Additionally, a large number of trials were identified (32 trials) for the  
427 primary outcome of body weight, the median follow-up period was 12 weeks which allows for  
428 the assessment of a moderate duration of intervention, none of the trials were rated as having a  
429 serious risk of bias, and there was no evidence of publication bias.

430

431 There are several limitations. First, the present systematic review and meta-analysis showed  
432 evidence of inconsistency in the treatment estimates across trials for some of the outcomes  
433 assessed. There was evidence of unexplained heterogeneity in waist circumference ( $I^2=62\%$ ) and  
434 in body fat ( $I^2=65\%$ ). Although the inconsistency in these outcomes may have related to  
435 measurement error<sup>69</sup> in the different techniques for measuring waist circumference and body fat,  
436 we were unable to conduct sensitivity or subgroup analyses to explore this source of

1  
2  
3 437 heterogeneity. Second, there was evidence of indirectness. Most of the available trials did not  
4  
5 438 quantify the amount of pasta consumed in the context of the low-GI dietary patterns. Although  
6  
7 439 sensitivity analyses in which analyses were restricted to the 11 trials that did quantify (providing  
8  
9 440 a median 3.33 servings/week) pasta intake did not meaningfully alter our estimates (-0.70kg  
10  
11 441 versus -0.63kg), it is difficult to quantify the effect of pasta in these diets. There is also the  
12  
13 442 question of translation to other background diets. Whether the observed effect of pasta in the  
14  
15 443 context of low-GI dietary patterns will hold in the context of other healthy dietary patterns, such  
16  
17 444 as Mediterranean and Vegetarian dietary patterns, is unclear. Although there is no biological  
18  
19 445 reason to doubt that the findings would hold, there is a lack of direct evidence to support this  
20  
21 446 conclusion. If the question had been asked from the perspective of benefit as opposed to that of  
22  
23 447 harm, then the relatively short duration of the included trials may be another reason to  
24  
25 448 downgrade for indirectness. In the absence of long-term trials (>1 year diet duration), it is  
26  
27 449 difficult to conclude with certainty that the observed lack of harm implies an actual sustainable  
28  
29 450 benefit. Finally, there was some evidence of imprecision for benefit but not harm. Whereas the  
30  
31 451 95% CI of the pooled estimates did not overlap with our pre-specified MID for harm (that is,  
32  
33 452 they did not contain evidence for harm) and so were not downgraded for imprecision, the upper  
34  
35 453 bound of the 95% CI would overlap with the lower bound of the same MID to assess the  
36  
37 454 precision of the evidence for benefit for some outcomes.  
38  
39  
40  
41  
42  
43  
44  
45

46  
47 456 Balancing these strengths and limitations, GRADE assessed the overall quality and strength of  
48  
49 457 the available evidence of the effect of pasta in the context of low-GI dietary patterns as moderate  
50  
51 458 for the primary outcome of body weight and the secondary outcomes of BMI, waist-to-hip ratio  
52  
53 459 and sagittal abdominal diameter owing to downgrades for indirectness. The evidence was  
54  
55  
56  
57  
58  
59  
60

1  
2  
3 460 assessed as low for the other secondary outcomes of body fat and waist circumference owing to  
4  
5 461 downgrades for indirectness and inconsistency.  
6  
7

8 462

### 10 463 **Implications**

12 464 These results are important considering the negative messages directed at the public regarding  
13  
14 465 carbohydrates, which is influencing their food choices, as is evident in recent reductions in  
15  
16 466 carbohydrate intake<sup>70-72</sup>, and in particular reductions in pasta consumption<sup>70,73-76</sup>. Contrary to  
17  
18  
19 467 these concerns, the available evidence shows that when pasta is consumed in the context of low-  
20  
21 468 GI dietary patterns that there is not weight gain but rather marginally clinically significant weight  
22  
23 469 loss (>0.5kg)<sup>77</sup>.  
24  
25

26 470

28 471 Although we were able to approximate the amount of pasta consumed in one third of included  
29  
30 472 trials, it is unclear what the effect of pasta would be in the context of other dietary patterns. Low-  
31  
32 473 GI dietary patterns, however, shares many similarities with a Mediterranean diet, which  
33  
34 474 emphasizes many low-GI foods and has demonstrated a CVD benefit<sup>57</sup>.  
35  
36

37 475

39 476 Current clinical practice guidelines already suggest the replacement of high GI foods with low-  
40  
41 477 GI foods for improvement of glycemic control and cardiovascular risk factors<sup>78,79</sup>. The present  
42  
43 478 evidence means that pasta may be highlighted as an important example of a low-GI food which  
44  
45 479 can contribute to a low-GI dietary pattern, a pattern which in turn may potentially improve  
46  
47 480 cardio-metabolic risk without an adverse effect on weight control.  
48  
49

50 481

51 482

## 54 **CONCLUSIONS**

1  
2  
3 483 In conclusion, pasta consumed in the context of low-GI dietary patterns does not have an adverse  
4  
5 484 effect on body weight and adiposity outcomes of importance in the prevention and management  
6  
7 485 of overweight and obesity. The results are generalizable in the context of a high carbohydrate  
8  
9 486 diet composed of low-GI foods with or without the intention of weight loss in middle-aged  
10  
11 487 individuals who are overweight or obese or have diabetes. Although the clinical significance of  
12  
13 488 the observed weight loss is debatable, this finding increases our confidence that pasta in the  
14  
15 489 context of low-GI dietary patterns does not result in weight gain. Further research may change  
16  
17 490 our confidence in the estimates for our primary outcome body weight and several key secondary  
18  
19 491 outcomes including BMI and two measures of abdominal adiposity, waist-to-hip ratio and  
20  
21 492 sagittal abdominal diameter. More research, however, is needed, to improve our estimates for  
22  
23 493 the secondary outcomes, body fat and waist circumference and assess whether our findings  
24  
25 494 extend to related cardio-metabolic outcomes. There is also a need for more randomized trials of  
26  
27 495 >1 year diet duration to clarify whether the lack of harm for pasta in the context of low-GI  
28  
29 496 dietary patterns will translate into meaningful long-term benefits. Other randomized trials should  
30  
31 497 focus on whether pasta will have similar effects in the context of other healthy dietary patterns  
32  
33 498 such as a Mediterranean diet.  
34  
35  
36  
37  
38  
39  
40  
41  
42  
43  
44  
45  
46  
47  
48  
49  
50  
51  
52  
53  
54  
55  
56  
57  
58  
59  
60



1  
2  
3 501 **Figure Legend**  
4

5 502 **Figure 1:** Literature Search  
6

7 503 **Figure 2:** Forest plot of randomized controlled trials investigating the effects of pasta in the  
8 504 context of low-GI dietary patterns on body weight (kg). n = 2448. Data are expressed as mean  
9 505 differences represented by a square and 95% CIs by the line through the square. 95% CIs  
10 506 exceeding the plot's bounds are represented by an arrowhead. Pooled effect estimates are  
11 507 represented by diamonds and were estimated with the use of generic inverse variance random  
12 508 effects models. Between-study heterogeneity was detected with the use of the Cochran's Q  
13 509 statistic at a significance level of  $P < 0.10$  and quantified with the use of the  $I^2$  statistic where  
14 510  $I^2 \geq 50\%$  is considered to be evidence of substantial heterogeneity and  $\geq 75\%$  considerable  
15 511 heterogeneity.

16 512 CHD, coronary heart disease; CHO, carbohydrate; CI, confidence interval; HGI, higher glycemic  
17 513 index diet; GI, glycemic index; LGI, low glycemic index diet; MUFA, monounsaturated fatty  
18 514 acids; Pro, protein.  
19  
20  
21 515  
22

23 516 **Figure 3:** Plot of pooled effect estimates from randomized controlled trials investigating the  
24 517 effects of pasta in the context of low-GI dietary patterns on global and abdominal markers of  
25 518 adiposity. Pooled effect estimates are represented by diamonds and were estimated with the use  
26 519 of generic inverse variance random effects models. Between-study heterogeneity was detected  
27 520 with the use of the Cochran's Q statistic at a significance level of  $P < 0.10$  and quantified with the  
28 521 use of the  $I^2$  statistic where  $I^2 \geq 50\%$  is considered to be evidence of substantial heterogeneity and  
29 522  $\geq 75\%$  considerable heterogeneity.

30 523 BMI; body mass index; CI, confidence interval; HGI, higher glycemic index diet; GI, glycemic  
31 524 index; LGI, low glycemic index diet.  
32  
33 525  
34  
35

36 526  
37  
38  
39  
40  
41  
42  
43  
44  
45  
46  
47  
48  
49  
50  
51  
52  
53  
54  
55  
56  
57  
58  
59  
60

1  
2  
3 **527 Acknowledgements**  
4

5 528 We wish to thank Teruko Kishibe, an information specialist in the Scotiabank Health Sciences  
6  
7 529 Library, St Michael's Hospital, for her help in the development of search terms used. Aspects of  
8  
9  
10 530 this work were presented at the Società Italiana di Nutrizione Umana (SINU) Congress, in  
11  
12 531 Parma, Italy, on April 12, 2017 and at the 35th International Symposium on Diabetes and  
13  
14 532 Nutrition, of the Diabetes and Nutrition Study Group (DNSG) of the European Association for  
15  
16  
17 533 the Study of Diabetes (EASD) in Skagen, Denmark, on June 20 and 21, 2017.  
18  
19

20 **534 Data Sharing**  
21  
22

23 535 No additional data available.  
24  
25  
26 536  
27

28 **537 Exclusive License**  
29  
30

31 538 The Corresponding Author has the right to grant on behalf of all authors and does grant on behalf  
32  
33 539 of all authors, an exclusive license (or non-exclusive for government employees) on a worldwide  
34  
35  
36 540 basis to the BMJ Publishing Group Ltd to permit this article (if accepted) to be published in BMJ  
37  
38 541 editions and any other BMJ PGL products and sublicenses such use and exploit all subsidiary  
39  
40  
41 542 rights, as set out in our license.  
42  
43

44 **543 Ethics Approval**  
45  
46

47 544 Not required.  
48  
49

50 **545 Authorship:**  
51

52 546 All authors had full access to all of the data (including statistical reports and tables) in this study  
53  
54  
55 547 and take full responsibility for the integrity of the data and the accuracy of the data analysis.  
56  
57  
58  
59  
60

1  
2  
3 548 **Conception and design:** C.W.C. Kendall, J.L. Sievenpiper.  
4  
5

6 549 **Analysis and interpretation of the data:** L. Chiavaroli, C.W.C. Kendall, C.R. Braunstein, S.  
7

8 Blanco Mejia, L.A. Leiter, D.J.A. Jenkins, J.L. Sievenpiper.  
9  
10

11 551 **Drafting of the article:** L. Chiavaroli, J.L. Sievenpiper.  
12  
13

14 552 **Critical revision of the article for important intellectual content:** L. Chiavaroli, C.W.C.  
15

16 Kendall, C.R. Braunstein, S. Blanco Mejia, L.A. Leiter, D.J.A. Jenkins, J.L. Sievenpiper.  
17  
18

19 554 **Final approval of the article:** L. Chiavaroli, C.W.C. Kendall, C.R. Braunstein, S. Blanco Mejia,  
20

21 L.A. Leiter, D.J.A. Jenkins, J.L. Sievenpiper.  
22  
23

24 556 **Obtaining of funding:** C.W.C. Kendall, D.J.A. Jenkins, J.L. Sievenpiper.  
25  
26

27 557 **Administrative, technical, or logistic support:** S. Blanco Mejia.  
28  
29

30 558 **Collection and assembly of data:** L. Chiavaroli, C.R. Braunstein, S. Blanco Mejia.  
31  
32

33 559 **Guarantor:** J.L. Sievenpiper.  
34  
35

36 560 **Transparency declaration:** As guarantor, J.L. Sievenpiper affirms that the manuscript is an  
37

38 561 honest, accurate, and transparent account of the study being reported; that no important aspects  
39

40 562 of the study have been omitted; and that any discrepancies from the study as planned (and, if  
41

42 563 relevant, registered) have been explained.  
43  
44

45 564 **Funding:**  
46  
47

48 565 This work was funded by the Canadian Institutes of Health Research (funding reference  
49

50 566 number, 129920) through the Canada-wide Human Nutrition Trialists' Network (NTN). The  
51

52 567 Diet, Digestive tract, and Disease (3-D) Centre, funded through the Canada Foundation for  
53

54 568 Innovation (CFI) and the Ministry of Research and Innovation's Ontario Research Fund (ORF),  
55  
56  
57  
58  
59  
60

1  
2  
3 569 provided the infrastructure for the conduct of this project. **L Chiavaroli** was funded by a Toronto  
4  
5 570 3D Postdoctoral Fellowship Award. **DJA Jenkins** was funded by the Government of Canada  
6  
7 571 through the Canada Research Chair Endowment. **JL Sievenpiper** was funded by a PSI Graham  
8  
9 572 Farquharson Knowledge Translation Fellowship, Canadian Diabetes Association (CDA)  
10  
11 573 Clinician Scientist award, CIHR INMD/CNS New Investigator Partnership Prize, and Banting &  
12  
13 574 Best Diabetes Centre Sun Life Financial New Investigator Award. None of the sponsors had a  
14  
15 575 role in any aspect of the present study, including design and conduct of the study; collection,  
16  
17 576 management, analysis, and interpretation of the data; and preparation, review, approval of the  
18  
19 577 manuscript or decision to publish.  
20  
21  
22  
23  
24  
25

26 579 **Conflicts of Interest:**

27  
28 580 All authors have completed the Unified Competing Interest form (available on request from the  
29  
30 581 corresponding author) and declare: **CWC Kendall** has received research support from the  
31  
32 582 Advanced Foods and Material Network, Agrifoods and Agriculture Canada, the Almond Board  
33  
34 583 of California, the American Pistachio Growers, Barilla, the California Strawberry Commission,  
35  
36 584 the Calorie Control Council, CIHR, the Canola Council of Canada, the Coca-Cola Company  
37  
38 585 (investigator initiated, unrestricted grant), Hain Celestial, the International Tree Nut Council  
39  
40 586 Nutrition Research and Education Foundation, Kellogg, Kraft, Loblaw Companies Ltd., Orafiti,  
41  
42 587 Pulse Canada, Saskatchewan Pulse Growers, Solae and Unilever. He has received travel funding,  
43  
44 588 consultant fees and/or honoraria from Abbott Laboratories, the Almond Board of California, the  
45  
46 589 American Peanut Council, the American Pistachio Growers, Barilla, Bayer, the Canola Council  
47  
48 590 of Canada, the Coca-Cola Company, Danone, General Mills, the International Tree Nut Council  
49  
50 591 Nutrition Research and Education Foundation, Kellogg, Loblaw Companies Ltd., the Nutrition  
51  
52 592 Foundation of Italy, Oldways Preservation Trust, Orafiti, Paramount Farms, the Peanut Institute,  
53  
54  
55  
56  
57  
58  
59  
60

1  
2  
3 593 PepsiCo, Pulse Canada, Sabra Dipping Co., Saskatchewan Pulse Growers, Solae, Sun-Maid, Tate  
4  
5 594 and Lyle, and Unilever. He is on the Clinical Practice Guidelines Expert Committee for Nutrition  
6  
7 595 Therapy of the European Association for the Study of Diabetes (EASD) and has served on the  
8  
9  
10 596 scientific advisory board for the Almond Board of California, the International Tree Nut Council,  
11  
12 597 Oldways Preservation Trust, Paramount Farms and Pulse Canada. **DJAJ** has received research  
13  
14 598 grants from Saskatchewan Pulse Growers, the Agricultural Bioproducts Innovation Program  
15  
16 599 through the Pulse Research Network, the Advanced Foods and Material Network, Loblaw  
17  
18 600 Companies Ltd., Unilever, Barilla, the Almond Board of California, Agriculture and Agri-food  
19  
20 601 Canada, Pulse Canada, Kellogg's Company, Canada, Quaker Oats, Canada, Procter & Gamble  
21  
22 602 Technical Centre Ltd., Bayer Consumer Care, Springfield, NJ, Pepsi/Quaker, International Nut  
23  
24 603 & Dried Fruit (INC), Soy Foods Association of North America, the Coca-Cola Company  
25  
26 604 (investigator initiated, unrestricted grant), Solae, Haine Celestial, the Sanitarium Company,  
27  
28 605 Orafiti, the International Tree Nut Council Nutrition Research and Education Foundation, the  
29  
30 606 Peanut Institute, the Canola and Flax Councils of Canada, the Calorie Control Council (CCC),  
31  
32 607 the CIHR, the Canada Foundation for Innovation and the Ontario Research Fund. He has  
33  
34 608 received in-kind supplies for trial as a research support from the Almond board of California,  
35  
36 609 Walnut Council of California, American Peanut Council, Barilla, Unilever, Unico, Primo,  
37  
38 610 Loblaw Companies, Quaker (Pepsico), Pristine Gourmet, Bunge Limited, Kellogg Canada,  
39  
40 611 WhiteWave Foods. He has been on the speaker's panel, served on the scientific advisory board  
41  
42 612 and/or received travel support and/or honoraria from the Almond Board of California, Canadian  
43  
44 613 Agriculture Policy Institute, Loblaw Companies Ltd, the Griffin Hospital (for the development of  
45  
46 614 the NuVal scoring system, the Coca-Cola Company, EPICURE, Danone, Diet Quality Photo  
47  
48 615 Navigation (DQPN), FareWell, Verywell, True Health Initiative, Saskatchewan Pulse Growers,  
49  
50  
51  
52  
53  
54  
55  
56  
57  
58  
59  
60

1  
2  
3 616 Sanitarium Company, Orafti, the Almond Board of California, the American Peanut Council, the  
4  
5 617 International Tree Nut Council Nutrition Research and Education Foundation, the Peanut  
6  
7 618 Institute, Herbalife International, Pacific Health Laboratories, Nutritional Fundamental for  
8  
9  
10 619 Health, Barilla, Metagenics, Bayer Consumer Care, Unilever Canada and Netherlands, Solae,  
11  
12 620 Kellogg, Quaker Oats, Procter & Gamble, the Coca-Cola Company, the Griffin Hospital, Abbott  
13  
14 621 Laboratories, the Canola Council of Canada, Dean Foods, the California Strawberry  
15  
16 622 Commission, Haine Celestial, PepsiCo, the Alpro Foundation, Pioneer Hi-Bred International,  
17  
18 623 DuPont Nutrition and Health, Spherix Consulting and WhiteWave Foods, the Advanced Foods  
19  
20 624 and Material Network, the Canola and Flax Councils of Canada, the Nutritional Fundamentals  
21  
22 625 for Health, Agri-Culture and Agri-Food Canada, the Canadian Agri-Food Policy Institute, Pulse  
23  
24 626 Canada, the Saskatchewan Pulse Growers, the Soy Foods Association of North America, the  
25  
26 627 Nutrition Foundation of Italy (NFI), Nutra-Source Diagnostics, the McDougall Program, the  
27  
28 628 Toronto Knowledge Translation Group (St. Michael's Hospital), the Canadian College of  
29  
30 629 Naturopathic Medicine, The Hospital for Sick Children, the Canadian Nutrition Society (CNS),  
31  
32 630 the American Society of Nutrition (ASN), Arizona State University, Paolo Sorbini Foundation  
33  
34 631 and the Institute of Nutrition, Metabolism and Diabetes. He received an honorarium from the  
35  
36 632 United States Department of Agriculture to present the 2013 W.O. Atwater Memorial Lecture.  
37  
38 633 He received the 2013 Award for Excellence in Research from the International Nut and Dried  
39  
40 634 Fruit Council. He received funding and travel support from the Canadian Society of  
41  
42 635 Endocrinology and Metabolism to produce mini cases for the Canadian Diabetes Association  
43  
44 636 (CDA). He is a member of the International Carbohydrate Quality Consortium (ICQC). His wife,  
45  
46 637 ALJ, is a director and partner of Glycemic Index Laboratories, Inc., and his sister received  
47  
48 638 funding through a grant from the St. Michael's Hospital Foundation to develop a cookbook for  
49  
50  
51  
52  
53  
54  
55  
56  
57  
58  
59  
60

1  
2  
3 639 one of his studies. **JL Sievenpiper** has received research support from the Canadian Institutes of  
4  
5 640 health Research (CIHR), Canadian Diabetes Association (CDA), PSI Foundation, Banting and  
6  
7 641 Best Diabetes Centre (BBDC), Canadian Nutrition Society (CNS), American Society for  
8  
9 642 Nutrition (ASN), Calorie Control Council, INC International Nut and Dried Fruit Council  
10  
11 643 Foundation, National Dried Fruit Trade Association, The Coca-Cola Company (investigator  
12  
13 644 initiated, unrestricted), Dr. Pepper Snapple Group (investigator initiated, unrestricted), The Tate  
14  
15 645 and Lyle Nutritional Research Fund at the University of Toronto, and The Alberta Pulse Growers  
16  
17 646 Glycemic Control and Cardiovascular Disease in Type 2 Diabetes Fund at the University of  
18  
19 647 Toronto. He has received in-kind research support from the Almond board of California, Walnut  
20  
21 648 Council of California, American Peanut Council, Barilla, Unilever, Unico, Primo, Loblaw  
22  
23 649 Companies, Quaker (Pepsico), Pristine Gourmet, Bunge Limited, Kellogg Canada, WhiteWave  
24  
25 650 Foods. He has received reimbursement of travel expenses, speaker fees, and/or honoraria from  
26  
27 651 the Canadian Diabetes Association (CDA), Canadian Nutrition Society (CNS), University of  
28  
29 652 Alabama at Birmingham, Oldways Preservation Trust, Nutrition Foundation of Italy (NFI),  
30  
31 653 Diabetes and Nutrition Study Group (DNSG) of the European Association for the Study of  
32  
33 654 Diabetes (EASD), International Life Sciences Institute (ILSI) North America, Dr. Pepper  
34  
35 655 Snapple Group, Corn Refiners Association, World Sugar Research Organization, Dairy Farmers  
36  
37 656 of Canada, Società Italiana di Nutrizione Umana (SINU), III World Congress of Public Health  
38  
39 657 Nutrition, C3 Collaborating for Health, Sprim Brasil, WhiteWave Foods, Rippe Lifestyle,  
40  
41 658 mdBriefcase, Federation of European Nutrition Societies (FENS), New York Academy of  
42  
43 659 Sciences, International Diabetes Federation, American Heart Association (AHA), American  
44  
45 660 Society for Nutrition (ASN), FoodMinds LLC, Memac Ogilvy & Mather LLC, Pulse Canada,  
46  
47 661 Pepsico, BCFN Foundation, The Ginger Network LLC, and Dietitians of Canada. He has ad hoc  
48  
49  
50  
51  
52  
53  
54  
55  
56  
57  
58  
59

1  
2  
3 662 consulting arrangements with Winston & Strawn LLP, Perkins Coie LLP, and Tate & Lyle. He is  
4  
5 663 a member of the European Fruit Juice Association Scientific Expert Panel. He is on Clinical  
6  
7 664 Practice Guidelines Expert Committees of the Canadian Diabetes Association (CDA) European  
8  
9 665 Association for the study of Diabetes (EASD), and Canadian Cardiovascular Society (CCS), as  
10  
11 666 well as an expert writing panel of the American Society for Nutrition (ASN). He serves as an  
12  
13 667 unpaid scientific advisor for the Food, Nutrition, and Safety Program (FNSP) and the Technical  
14  
15 668 Committee on Carbohydrates of the International Life Science Institute (ILSI) North America.  
16  
17 669 He is a member of the International Carbohydrate Quality Consortium (ICQC), Executive Board  
18  
19 670 Member of the Diabetes and Nutrition Study Group (DNSG) of the EASD, and Director of the  
20  
21 671 Toronto 3D Knowledge Synthesis and Clinical Trials foundation. His wife is an employee of  
22  
23 672 Unilever Canada. No competing interests were declared by **CR Braunstein, S Blanco Mejia,**  
24  
25 673 **and LA Leiter.**  
26  
27  
28  
29  
30  
31  
32  
33  
34  
35  
36  
37  
38  
39  
40  
41  
42  
43  
44  
45  
46  
47  
48  
49  
50  
51  
52  
53  
54  
55  
56  
57  
58  
59  
60



687 **References**

- 688 1. Malhotra A. Eating MORE fat while cutting carbs and quitting sugar can help you lose weight and  
689 be happier, says top cardiologist. Mail Online 2016.
- 690 2. Taubes G. Diet Advice That Ignores Hunger. The New York Times. Sunday Review ed 2015.
- 691 3. Ludwig D. Always hungry? Conquer cravings, retrain your fat cells and lose weight permanently.  
692 New York: Grand Central Life & Style; 2016.
- 693 4. Taubes G. Why We Get Fat And What To Do About It. . New York: Alfred A Knopf; 2011.
- 694 5. Atkins R. Dr Atkins' Diet Revolution: The High Calorie Way to Stay Thin Forever. : Bantam Books;  
695 1973.
- 696 6. Perlmutter D. Grain Brain: The surprising truth about wheat, carbs, and sugar -- Your brain's  
697 silent killers: Little, Brown And Company; 2013.
- 698 7. David W. Wheat Belly: HarperCollins; 2012.
- 699 8. Cordain L. The Paleo Diet Revised: Lose weight and get healthy by eating the foods you were  
700 designed to eat: Houghton Mifflin Harcourt; 2010.
- 701 9. Teicholz N. The Big Fat Surprise: Why Butter, Meat and Cheese Belong in a Healthy Diet: Simon  
702 and Schuster; 2014.
- 703 10. National Obesity Forum, The Public Health Collaboration. Eat Fat, Cut The Carbs and Avoid  
704 Snacking To Reverse Obesity and Type 2 Diabetes.
- 705 11. Malhotra A. Saturated fat is not the major issue. BMJ 2013;347:f6340.
- 706 12. Malhotra A. Author's reply to Lichtenstein, Tedstone and Pyne, Mann and colleagues, Lim, and  
707 Clifton. BMJ 2013;347:f6855.
- 708 13. Thomas DE, Elliott EJ, Baur L. Low glycaemic index or low glycaemic load diets for overweight  
709 and obesity. Cochrane Database Syst Rev 2007:CD005105.
- 710 14. Schwingshackl L, Hoffmann G. Long-term effects of low glycemic index/load vs. high glycemic  
711 index/load diets on parameters of obesity and obesity-associated risks: a systematic review and meta-  
712 analysis. Nutr Metab Cardiovasc Dis 2013;23:699-706.
- 713 15. Pol K, Christensen R, Bartels EM, Raben A, Tetens I, Kristensen M. Whole grain and body weight  
714 changes in apparently healthy adults: a systematic review and meta-analysis of randomized controlled  
715 studies. Am J Clin Nutr 2013;98:872-84.
- 716 16. Harland JI, Garton LE. Whole-grain intake as a marker of healthy body weight and adiposity.  
717 Public Health Nutr 2008;11:554-63.
- 718 17. Slavin JL. Dietary fiber and body weight. Nutrition 2005;21:411-8.
- 719 18. Dahl WJ, Stewart ML. Position of the Academy of Nutrition and Dietetics: Health Implications of  
720 Dietary Fiber. J Acad Nutr Diet 2015;115:1861-70.
- 721 19. Higgins JP, Green S, eds. Cochrane Handbook for Systematic Reviews of Interventions [Internet].  
722 Version 5.1.0. The Cochrane Collaboration. Version current March 2011 [cited 2015 Sep 23]. Available  
723 from: [www.cochrane-handbook.org](http://www.cochrane-handbook.org).
- 724 20. Moher D, Liberati A, Tetzlaff J, Altman DG, Group P. Preferred reporting items for systematic  
725 reviews and meta-analyses: the PRISMA statement. Ann Intern Med 2009;151:264-9, W64.
- 726 21. Elbourne DR, Altman DG, Higgins JP, Curtin F, Worthington HV, Vail A. Meta-analyses involving  
727 cross-over trials: methodological issues. Int J Epidemiol 2002;31:140-9.
- 728 22. Egger M, Davey Smith G, Schneider M, Minder C. Bias in meta-analysis detected by a simple,  
729 graphical test. BMJ 1997;315:629-34.
- 730 23. Begg CB. A measure to aid in the interpretation of published clinical trials. Stat Med 1985;4:1-9.
- 731 24. Duval S, Tweedie R. Trim and fill: A simple funnel-plot-based method of testing and adjusting for  
732 publication bias in meta-analysis. Biometrics 2000;56:455-63.

- 1  
2  
3 733 25. Guyatt G, Oxman AD, Akl EA, et al. GRADE guidelines: 1. Introduction-GRADE evidence profiles  
4 734 and summary of findings tables. *J Clin Epidemiol* 2011;64:383-94.
- 5 735 26. Jebb SA, Lovegrove JA, Griffin BA, et al. Effect of changing the amount and type of fat and  
6 736 carbohydrate on insulin sensitivity and cardiovascular risk: the RISCK (Reading, Imperial, Surrey,  
7 737 Cambridge, and Kings) trial. *Am J Clin Nutr* 2010;92:748-58.
- 8 738 27. Philippou E, Bovill-Taylor C, Rajkumar C, et al. Preliminary report: the effect of a 6-month dietary  
9 739 glycemic index manipulation in addition to healthy eating advice and weight loss on arterial compliance  
10 740 and 24-hour ambulatory blood pressure in men: a pilot study. *Metabolism* 2009;58:1703-8.
- 11 741 28. Philippou E, McGowan BM, Brynes AE, Dornhorst A, Leeds AR, Frost GS. The effect of a 12-week  
12 742 low glycaemic index diet on heart disease risk factors and 24 h glycaemic response in healthy middle-  
13 743 aged volunteers at risk of heart disease: a pilot study. *Eur J Clin Nutr* 2008;62:145-9.
- 14 744 29. Sichieri R, Moura AS, Genelhu V, Hu F, Willett WC. An 18-mo randomized trial of a low-glycemic-  
15 745 index diet and weight change in Brazilian women. *Am J Clin Nutr* 2007;86:707-13.
- 16 746 30. Wolever TM, Mehling C. High-carbohydrate-low-glycaemic index dietary advice improves  
17 747 glucose disposition index in subjects with impaired glucose tolerance. *Br J Nutr* 2002;87:477-87.
- 18 748 31. Pereira EV, Costa Jde A, Alfenas Rde C. Effect of glycemic index on obesity control. *Arch*  
19 749 *Endocrinol Metab* 2015;59:245-51.
- 20 750 32. Karl JP, Roberts SB, Schaefer EJ, et al. Effects of carbohydrate quantity and glycemic index on  
21 751 resting metabolic rate and body composition during weight loss. *Obesity (Silver Spring)* 2015;23:2190-8.
- 22 752 33. Buscemi S, Cosentino L, Rosafio G, et al. Effects of hypocaloric diets with different glycemic  
23 753 indexes on endothelial function and glycemic variability in overweight and in obese adult patients at  
24 754 increased cardiovascular risk. *Clin Nutr* 2013;32:346-52.
- 25 755 34. Larsen TM, Dalskov SM, van Baak M, et al. Diets with high or low protein content and glycemic  
26 756 index for weight-loss maintenance. *N Engl J Med* 2010;363:2102-13.
- 27 757 35. Solomon TP, Haus JM, Kelly KR, et al. A low-glycemic index diet combined with exercise reduces  
28 758 insulin resistance, postprandial hyperinsulinemia, and glucose-dependent insulinotropic polypeptide  
29 759 responses in obese, prediabetic humans. *Am J Clin Nutr* 2010;92:1359-68.
- 30 760 36. Philippou E, Neary NM, Chaudhri O, et al. The effect of dietary glycemic index on weight  
31 761 maintenance in overweight subjects: a pilot study. *Obesity (Silver Spring)* 2009;17:396-401.
- 32 762 37. Abete I, Parra D, Martinez JA. Energy-restricted diets based on a distinct food selection affecting  
33 763 the glycemic index induce different weight loss and oxidative response. *Clin Nutr* 2008;27:545-51.
- 34 764 38. Aston LM, Stokes CS, Jebb SA. No effect of a diet with a reduced glycaemic index on satiety,  
35 765 energy intake and body weight in overweight and obese women. *Int J Obes (Lond)* 2008;32:160-5.
- 36 766 39. Jensen L, Sloth B, Krog-Mikkelsen I, et al. A low-glycemic-index diet reduces plasma plasminogen  
37 767 activator inhibitor-1 activity, but not tissue inhibitor of proteinases-1 or plasminogen activator inhibitor-  
38 768 1 protein, in overweight women. *Am J Clin Nutr* 2008;87:97-105.
- 39 769 40. Bellisle F, Dalix AM, De Assis MA, et al. Motivational effects of 12-week moderately restrictive  
40 770 diets with or without special attention to the Glycaemic Index of foods. *Br J Nutr* 2007;97:790-8.
- 41 771 41. de Rougemont A, Normand S, Nazare JA, et al. Beneficial effects of a 5-week low-glycaemic  
42 772 index regimen on weight control and cardiovascular risk factors in overweight non-diabetic subjects. *Br J*  
43 773 *Nutr* 2007;98:1288-98.
- 44 774 42. McMillan-Price J, Petocz P, Atkinson F, et al. Comparison of 4 diets of varying glycemic load on  
45 775 weight loss and cardiovascular risk reduction in overweight and obese young adults: a randomized  
46 776 controlled trial. *Arch Intern Med* 2006;166:1466-75.
- 47 777 43. Visek J, Lacigova S, Cechurova D, Rusavy Z. Comparison of a low-glycemic index vs standard  
48 778 diabetic diet. *Biomed Pap Med Fac Univ Palacky Olomouc Czech Repub* 2014;158:112-6.

- 1  
2  
3 779 44. Jenkins DJ, Kendall CW, Vuksan V, et al. Effect of lowering the glycemic load with canola oil on  
4 780 glycemic control and cardiovascular risk factors: a randomized controlled trial. *Diabetes Care*  
5 781 2014;37:1806-14.  
6 782 45. Jenkins DJ, Kendall CW, Augustin LS, et al. Effect of legumes as part of a low glycemic index diet  
7 783 on glycemic control and cardiovascular risk factors in type 2 diabetes mellitus: a randomized controlled  
8 784 trial. *Arch Intern Med* 2012;172:1653-60.  
9 785 46. Yusof BN, Talib RA, Kamaruddin NA, Karim NA, Chinna K, Gilbertson H. A low-GI diet is  
10 786 associated with a short-term improvement of glycaemic control in Asian patients with type 2 diabetes.  
11 787 *Diabetes Obes Metab* 2009;11:387-96.  
12 788 47. Wolever TM, Gibbs AL, Mehling C, et al. The Canadian Trial of Carbohydrates in Diabetes (CCD),  
13 789 a 1-y controlled trial of low-glycemic-index dietary carbohydrate in type 2 diabetes: no effect on  
14 790 glycosylated hemoglobin but reduction in C-reactive protein. *Am J Clin Nutr* 2008;87:114-25.  
15 791 48. Jenkins DJ, Kendall CW, McKeown-Eyssen G, et al. Effect of a low-glycemic index or a high-cereal  
16 792 fiber diet on type 2 diabetes: a randomized trial. *JAMA* 2008;300:2742-53.  
17 793 49. Jimenez-Cruz A, Bacardi-Gascon M, Turnbull WH, Rosales-Garay P, Severino-Lugo I. A flexible,  
18 794 low-glycemic index mexican-style diet in overweight and obese subjects with type 2 diabetes improves  
19 795 metabolic parameters during a 6-week treatment period. *Diabetes Care* 2003;26:1967-70.  
20 796 50. Heilbronn LK, Noakes M, Clifton PM. The effect of high- and low-glycemic index energy  
21 797 restricted diets on plasma lipid and glucose profiles in type 2 diabetic subjects with varying glycemic  
22 798 control. *J Am Coll Nutr* 2002;21:120-7.  
23 799 51. Fontvieille AM, Acosta M, Rizkalla SW, et al. A moderate switch from high to low glycemic-index  
24 800 foods for 3 weeks improves metabolic control of type I (IDDM) diabetic subjects. *Diabetes Nutr Metab*  
25 801 1988;1:139-43.  
26 802 52. Frost GS, Brynes AE, Bovill-Taylor C, Dornhorst A. A prospective randomised trial to determine  
27 803 the efficacy of a low glycaemic index diet given in addition to healthy eating and weight loss advice in  
28 804 patients with coronary heart disease. *Eur J Clin Nutr* 2004;58:121-7.  
29 805 53. de Assis Costa J, de Cassia Goncalves Alfensa R. The consumption of low glycemic meals reduces  
30 806 abdominal obesity in subjects with excess body weight. *Nutricion Hospitalaria* 2012;27:1178-83.  
31 807 54. Fontvieille AM, Rizkalla SW, Penfornis A, Acosta M, Bornet FR, Slama G. The use of low  
32 808 glycaemic index foods improves metabolic control of diabetic patients over five weeks. *Diabet Med*  
33 809 1992;9:444-50.  
34 810 55. Bibiloni MDM, Fernandez-Blanco J, Pujol-Plana N, et al. [Improving diet quality in children  
35 811 through a new nutritional education programme: INFADIMED]. *Gac Sanit* 2017.  
36 812 56. Pounis G, Castelnuovo AD, Costanzo S, et al. Association of pasta consumption with body mass  
37 813 index and waist-to-hip ratio: results from Moli-sani and INHES studies. *Nutr Diabetes* 2016;6:e218.  
38 814 57. Estruch R, Ros E, Salas-Salvado J, et al. Primary prevention of cardiovascular disease with a  
39 815 Mediterranean diet. *N Engl J Med* 2013;368:1279-90.  
40 816 58. Shay CM, Van Horn L, Stamler J, et al. Food and nutrient intakes and their associations with  
41 817 lower BMI in middle-aged US adults: the International Study of Macro-/Micronutrients and Blood  
42 818 Pressure (INTERMAP). *Am J Clin Nutr* 2012;96:483-91.  
43 819 59. Smith JD, Hou T, Ludwig DS, et al. Changes in intake of protein foods, carbohydrate amount and  
44 820 quality, and long-term weight change: results from 3 prospective cohorts. *Am J Clin Nutr* 2015;101:1216-  
45 821 24.  
46 822 60. Granfeldt Y, Bjorck I. Glycemic response to starch in pasta: a study of mechanisms of limited  
47 823 enzyme availability. *J Cereal Sci* 1991;14:47-61.  
48 824 61. Granfeldt Y, Bjorck I, Hagander B. On the importance of processing conditions, product thickness  
49 825 and egg addition for the glycaemic and hormonal responses to pasta: a comparison with bread made  
50 826 from 'pasta ingredients'. *Eur J Clin Nutr* 1991;45:489-99.

- 1  
2  
3 827 62. Frost GS, Brynes AE, Dhillon WS, Bloom SR, McBurney MI. The effects of fiber enrichment of pasta  
4 828 and fat content on gastric emptying, GLP-1, glucose, and insulin responses to a meal. *Eur J Clin Nutr*  
5 829 2003;57:293-8.
- 6 830 63. Korczak R, Timm D, Ahnen R, Thomas W, Slavin JL. High Protein Pasta is Not More Satiating than  
7 831 High Fiber Pasta at a Lunch Meal, Nor Does it Decrease Mid-Afternoon Snacking in Healthy Men and  
8 832 Women. *J Food Sci* 2016;81:S2240-5.
- 9 833 64. Atkinson FS, Foster-Powell K, Brand-Miller JC. International tables of glycemic index and  
10 834 glycemic load values: 2008. *Diabetes Care* 2008;31:2281-3.
- 11 835 65. Ludwig DS. Dietary glycemic index and obesity. *J Nutr* 2000;130:280S-3S.
- 12 836 66. Riccardi G, Rivellese AA, Giacco R. Role of glycemic index and glycemic load in the healthy state,  
13 837 in prediabetes, and in diabetes. *Am J Clin Nutr* 2008;87:269S-74S.
- 14 838 67. Saris WH, Astrup A, Prentice AM, et al. Randomized controlled trial of changes in dietary  
15 839 carbohydrate/fat ratio and simple vs complex carbohydrates on body weight and blood lipids: the  
16 840 CARMEN study. The Carbohydrate Ratio Management in European National diets. *Int J Obes Relat*  
17 841 *Metab Disord* 2000;24:1310-8.
- 18 842 68. Ludwig DS, Majzoub JA, Al-Zahrani A, Dallal GE, Blanco I, Roberts SB. High glycemic index foods,  
19 843 overeating, and obesity. *Pediatrics* 1999;103:E26.
- 20 844 69. Wang J, Thornton JC, Bari S, et al. Comparisons of waist circumferences measured at 4 sites. *Am*  
21 845 *J Clin Nutr* 2003;77:379-84.
- 22 846 70. Makarem N, Scott M, Quatromoni P, Jacques P, Parekh N. Trends in dietary carbohydrate  
23 847 consumption from 1991 to 2008 in the Framingham Heart Study Offspring Cohort. *Br J Nutr*  
24 848 2014;111:2010-23.
- 25 849 71. Rehm CD, Penalvo JL, Afshin A, Mozaffarian D. Dietary Intake Among US Adults, 1999-2012.  
26 850 *JAMA* 2016;315:2542-53.
- 27 851 72. Golzarand M, Mirmiran P, Jessri M, Toolabi K, Mojarrad M, Azizi F. Dietary trends in the Middle  
28 852 East and North Africa: an ecological study (1961 to 2007). *Public Health Nutr* 2012;15:1835-44.
- 29 853 73. Leclercq C, Arcella D, Piccinelli R, et al. The Italian National Food Consumption Survey INRAN-  
30 854 SCAI 2005-06: main results in terms of food consumption. *Public Health Nutr* 2009;12:2504-32.
- 31 855 74. Bonaccio M, Di Castelnuovo A, Bonanni A, et al. Decline of the Mediterranean diet at a time of  
32 856 economic crisis. Results from the Moli-sani study. *Nutr Metab Cardiovasc Dis* 2014;24:853-60.
- 33 857 75. Sofi F, Innocenti G, Dini C, et al. Low adherence of a clinically healthy Italian population to  
34 858 nutritional recommendations for primary prevention of chronic diseases. *Nutr Metab Cardiovasc Dis*  
35 859 2006;16:436-44.
- 36 860 76. Ferdman RA. This is what happens when everyone is terrified of carbs. *The Washington Post*  
37 861 2015 September 2, 2015.
- 38 862 77. Johnston BC, Kanters S, Bandayrel K, et al. Comparison of weight loss among named diet  
39 863 programs in overweight and obese adults: a meta-analysis. *JAMA* 2014;312:923-33.
- 40 864 78. Stone NJ, Robinson JG, Lichtenstein AH, et al. 2013 ACC/AHA guideline on the treatment of  
41 865 blood cholesterol to reduce atherosclerotic cardiovascular risk in adults: a report of the American  
42 866 College of Cardiology/American Heart Association Task Force on Practice Guidelines. *Circulation*  
43 867 2014;129:S1-45.
- 44 868 79. Anderson TJ, Gregoire J, Hegele RA, et al. 2012 update of the Canadian Cardiovascular Society  
45 869 guidelines for the diagnosis and treatment of dyslipidemia for the prevention of cardiovascular disease  
46 870 in the adult. *Can J Cardiol* 2013;29:151-67.

871

872

873 **Table 1:** Summary of trial characteristics

| <b>Trial Characteristics*</b>                                  | <b>ALL</b>         | <b>Neutral Energy Balance</b> | <b>Negative Energy Balance</b> |
|----------------------------------------------------------------|--------------------|-------------------------------|--------------------------------|
| <b>Trial Number (n)</b>                                        | 32                 | 23                            | 9                              |
| <b>Trial Size (total, range)</b>                               | 2448 (8 - 250)     | 1989 (8 - 250)                | 459 (13 - 123)                 |
| <b>Male: Female<sup>a</sup> (%)</b>                            | 40:60              | 47:53                         | 27:73                          |
| <b>Age (years)</b>                                             | 50 (40 - 58)       | 52.0 (42.1 – 59.5)            | 49.5 (34.2 – 53.0)             |
| <b>Metabolic Phenotype (OW/OB:DM:CHD) (%)</b>                  | 66:31:3            | 57:39:4                       | 89:11:0                        |
| <b>Setting (IP:OP) (%)</b>                                     | 3:97               | 4:96                          | 0:100                          |
| <b>Baseline Body Weight (kg)<sup>b</sup></b>                   | 85.5 (80.0 - 91.9) | 84.1 (79.5 – 87.5)            | 92.5 (86.1 – 93.9)             |
| <b>Baseline BMI (kg/m<sup>2</sup>)<sup>c</sup></b>             | 30.4 (28.2 - 32.0) | 29.5 (27.4 – 31.4)            | 31.7 (30.1 – 32.9)             |
| <b>Study Design (C:P) (%)</b>                                  | 19:81              | 26:74                         | 0:100                          |
| <b>Dose Pasta (servings/week)<sup>d</sup></b>                  | 3.3 (2.3 - 3.5)    | 3.4 (2.9 – 4.1)               | 2.3 (2.3-3.5)                  |
| <b>GI in Pasta/LGI group</b>                                   | 49.0 (44.0 - 55.1) | 46.5 (49.9 – 55.5)            | 44.0 (42.3 - 49.4)             |
| <b>GI in Higher GI group</b>                                   | 62.5 (61.6 - 63.2) | 63.3 (60.1 – 64.4)            | 61.0 (59.2 – 66.6)             |
| <b>Calorie reduction in Pasta/LGI group (kcal)<sup>e</sup></b> | -179 (-90 - -448)  | -165 (-74 - -313)             | -447 (-134 - -594)             |
| <b>Calorie reduction in Higher GI group (kcal)<sup>e</sup></b> | -181 (-93 - -401)  | -160 (-40 - -248)             | -470 (-172 - -561)             |
| <b>Feeding Control (Met:Supp:DA) (%)</b>                       | 6:44:50            | 4:48:48                       | 11:33:56                       |
| <b>Follow-Up Duration (Weeks)</b>                              | 12 (9-21)          | 12 (6-24)                     | 12 (10 - 21)                   |
| <b>Funding Sources (A:I:AI:NR) (%)</b>                         | 47:9:25:19         | 44:13:26:17                   | 56:0:22:22                     |

874  
875 \* median (inter quartile range), unless otherwise indicated

876 <sup>a</sup>24/32 trials provided data on sex

877 <sup>b</sup> 30/32 trials reported baseline body weight

878 <sup>c</sup> 28/32 trials reported baseline BMI

879 <sup>d</sup> 11/32 trials provided data from which dose could be approximated

880 <sup>e</sup> 20/32 trials provided data from which to approximate changes in caloric intake

881 A, agency; AI, agency and industry; BMI, body mass index; C, crossover design; CHD, coronary  
882 heart disease; DA, dietary advice; DM, diabetes; GI, glycemic index; I, industry; IP, inpatient;  
883 LGI, low glycemic index; Met, metabolic; NR, not reported; OB, obese; OP, outpatient; OW,  
884 overweight; P, parallel design; Suppl, supplemented/provision of certain food

1  
2  
3  
4  
5  
6  
7  
8  
9  
10  
11  
12  
13  
14  
15  
16  
17  
18  
19  
20  
21  
22  
23  
24  
25  
26  
27  
28  
29  
30  
31  
32  
33  
34  
35  
36  
37  
38  
39  
40  
41  
42  
43  
44  
45  
46  
47  
48  
49  
50  
51  
52  
53  
54  
55  
56  
57  
58  
59  
60

For peer review only

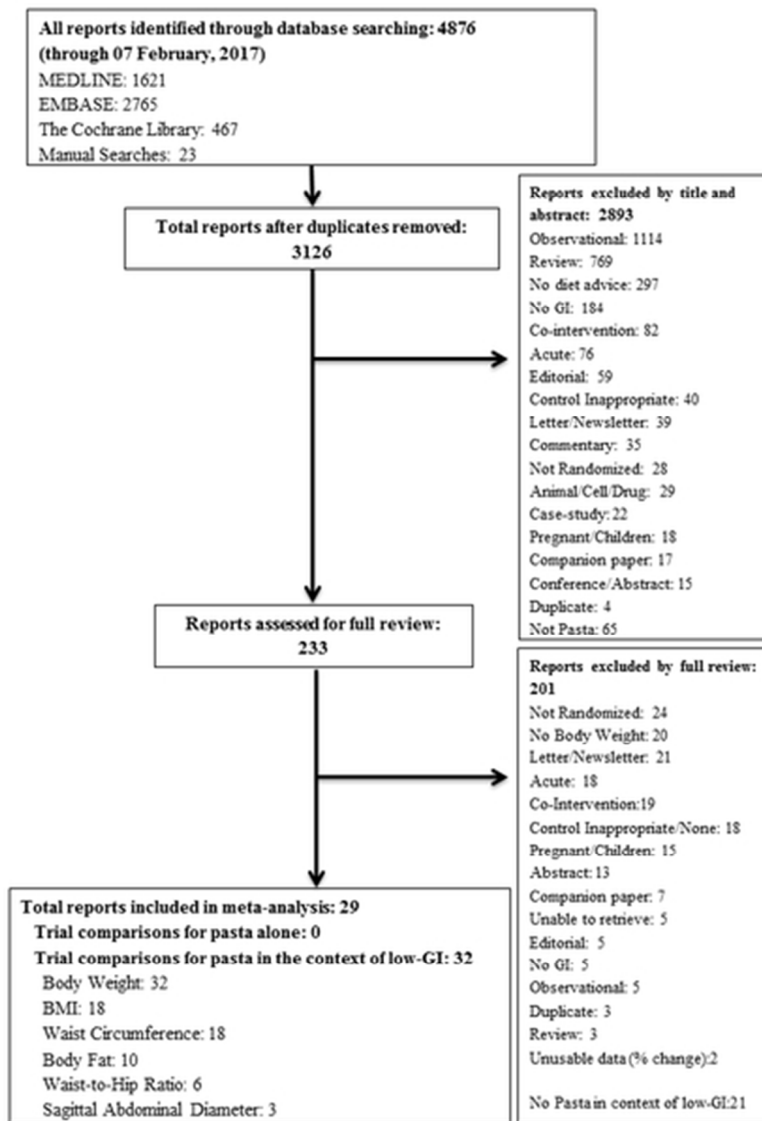

Figure 1: Literature Search

40x54mm (300 x 300 DPI)

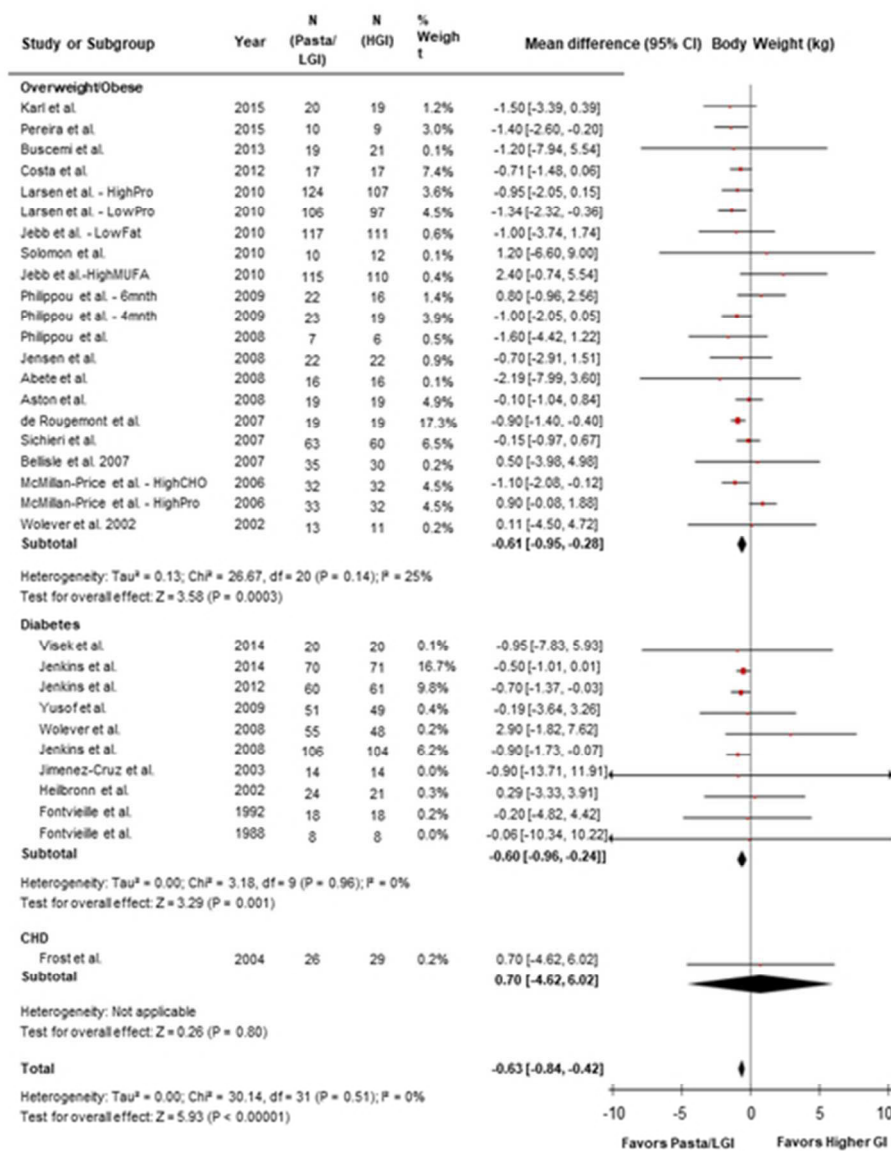

Figure 2: Forest plot of randomized controlled trials investigating the effects of pasta in the context of low-GI dietary patterns on body weight (kg). n = 2448. Data are expressed as mean differences represented by a square and 95% CIs by the line through the square. 95% CIs exceeding the plot's bounds are represented by an arrowhead. Pooled effect estimates are represented by diamonds and were estimated with the use of generic inverse variance random effects models. Between-study heterogeneity was detected with the use of the Cochran's Q statistic at a significance level of P<0.10 and quantified with the use of the I<sup>2</sup> statistic where I<sup>2</sup>≥50% is considered to be evidence of substantial heterogeneity and ≥75% considerable heterogeneity.

CHD, coronary heart disease; CHO, carbohydrate; CI, confidence interval; HGI, higher glycemic index diet; GI, glycemic index; LGI, low glycemic index diet; MUFA, monounsaturated fatty acids; Pro, protein.

40x54mm (300 x 300 DPI)



1  
2  
3  
4  
5  
6  
7  
8  
9  
10  
11  
12  
13  
14  
15  
16  
17  
18  
19  
20  
21  
22  
23  
24  
25  
26  
27  
28  
29  
30  
31  
32  
33  
34  
35  
36  
37  
38  
39  
40  
41  
42  
43  
44  
45  
46  
47  
48  
49  
50  
51  
52  
53  
54  
55  
56  
57  
58  
59  
60

For peer review only

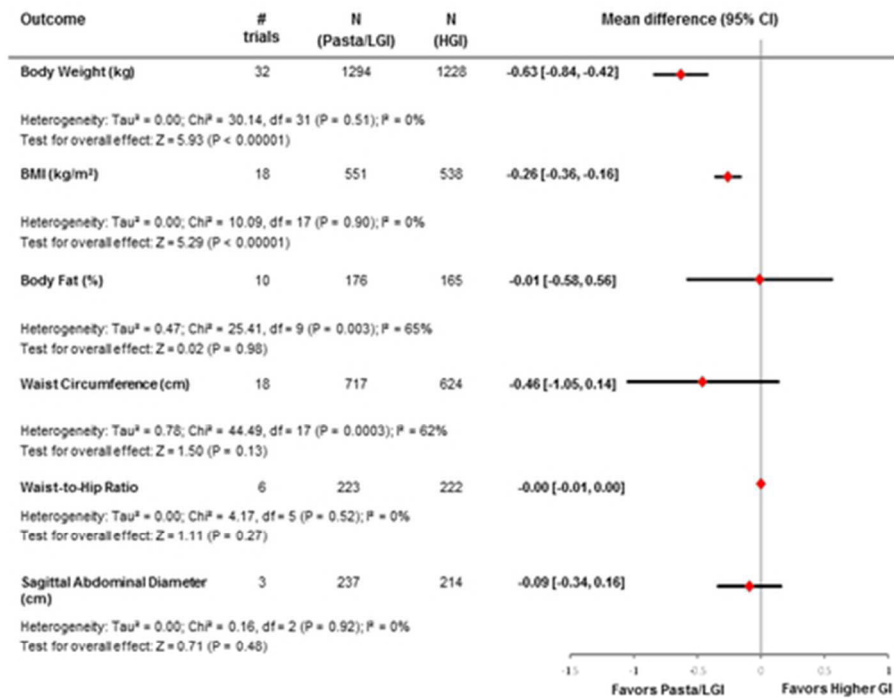

Figure 3: Plot of pooled effect estimates from randomized controlled trials investigating the effects of pasta in the context of low-GI dietary patterns on global and abdominal markers of adiposity. Pooled effect estimates are represented by diamonds and were estimated with the use of generic inverse variance random effects models. Between-study heterogeneity was detected with the use of the Cochran’s Q statistic at a significance level of  $P < 0.10$  and quantified with the use of the I<sup>2</sup> statistic where  $I^2 \geq 50\%$  is considered to be evidence of substantial heterogeneity and  $\geq 75\%$  considerable heterogeneity. BMI; body mass index; CI, confidence interval; HGI, higher glycemic index diet; LGI, low glycemic index diet.

40x54mm (300 x 300 DPI)

## Online Supplemental Information

### Table of Contents

|                                                                                                                                                                                                       |    |
|-------------------------------------------------------------------------------------------------------------------------------------------------------------------------------------------------------|----|
| Supplemental Tables.....                                                                                                                                                                              | 4  |
| Supplemental Table S1: Search strategy for studies assessing the effect of pasta in the context of low-GI dietary patterns on body weight in randomized controlled trials .....                       | 4  |
| Supplemental Table S2: PICO framework of the search strategy.....                                                                                                                                     | 6  |
| Supplement Table S3a: Trial characteristics .....                                                                                                                                                     | 7  |
| Supplement Table S3b: Trial characteristics continued.....                                                                                                                                            | 8  |
| Supplement Table S3c: Trial characteristics continued .....                                                                                                                                           | 9  |
| Supplement Table S3d: Trial characteristics continued.....                                                                                                                                            | 10 |
| Supplement Table S3e: Trial characteristics continued.....                                                                                                                                            | 11 |
| Supplemental Table S4: Sensitivity analysis of the systematic removal of each trial* .....                                                                                                            | 12 |
| Supplemental Table S5: Sensitivity analyses of the use of correlation coefficients of 0.25 and 0.75 for crossover trials.....                                                                         | 15 |
| Supplement Table S6. Continuous meta-regression analysis for the effect of pasta in the context of low-GI dietary patterns on body weight (kg) <sup>1</sup> .....                                     | 16 |
| Supplemental Table S7. Continuous meta-regression analysis for the effect of pasta in the context of low-GI dietary patterns on BMI (kg/m <sup>2</sup> ) <sup>1</sup> .....                           | 18 |
| Supplemental Table S8. Continuous meta-regression analysis for the effect of pasta in the context of low-GI dietary patterns on body fat (%) <sup>1</sup> .....                                       | 20 |
| Supplemental Table S9. Continuous meta-regression analysis for the effect of pasta in the context of low-GI dietary patterns on waist circumference (cm) <sup>1</sup> .....                           | 22 |
| Supplementary Table S10. Post-hoc piecewise linear continuous dose-response meta-regression analyses for the effect of pasta intake in the context of low-GI dietary patterns on body weight (kg). 24 |    |
| Supplementary Table S11: GRADE assessment of study quality .....                                                                                                                                      | 25 |
| Supplemental Table S12: PRISMA Checklist .....                                                                                                                                                        | 28 |
| Supplemental Figures .....                                                                                                                                                                            | 31 |
| Supplemental Figure S1: Cochrane risk of bias summary for all included trials.....                                                                                                                    | 31 |
| Supplemental Figure S2: Risk of bias proportion graph for all included trials.....                                                                                                                    | 32 |
| Supplemental Figure S3: Forest plot of randomized controlled trials investigating the effects of pasta in the context of low-GI dietary patterns on BMI (kg/m <sup>2</sup> ) (n= 1038) .....          | 33 |
| Supplemental Figure S4: Forest plot of randomized controlled trials investigating the effects of pasta in the context of low-GI dietary patterns on body fat (%) (n= 285) .....                       | 34 |

|    |                                                                                                                   |
|----|-------------------------------------------------------------------------------------------------------------------|
| 1  |                                                                                                                   |
| 2  |                                                                                                                   |
| 3  | Supplemental Figure S5: Forest plot of randomized controlled trials investigating the effects of pasta            |
| 4  | in the context of low-GI dietary patterns on waist circumference (cm) (n = 1380)..... 35                          |
| 5  |                                                                                                                   |
| 6  | Supplemental Figure S6: Forest plot of randomized controlled trials investigating the effects of pasta            |
| 7  | in the context of low-GI dietary patterns on waist-to-hip ratio (n = 445)..... 36                                 |
| 8  |                                                                                                                   |
| 9  | Supplemental Figure S7: Forest plot of randomized controlled trials investigating the effects of pasta            |
| 10 | in the context of low-GI dietary patterns on sagittal abdominal diameter (cm) (n = 478) ..... 37                  |
| 11 |                                                                                                                   |
| 12 | Supplemental Figure S8: Forest plot of randomized controlled trials investigating the effects of pasta            |
| 13 | in the context of low-GI dietary patterns on body weight (kg) using fixed effects models (n = 2448) .. 38         |
| 14 |                                                                                                                   |
| 15 | Supplemental Figure S9: Forest plot of randomized controlled trials which contain data for                        |
| 16 | approximating pasta intake which are investigating the effects of pasta in the context of low-GI                  |
| 17 | dietary patterns on body weight (kg) (n = 740) ..... 39                                                           |
| 18 |                                                                                                                   |
| 19 | Supplemental Figure S10: Subgroup analysis for mean differences (95% CIs) of the effects of pasta in              |
| 20 | the context of low-GI dietary patterns on body weight (kg) (n = 2448)..... 40                                     |
| 21 |                                                                                                                   |
| 22 | Supplemental Figure S11: Subgroup analysis for mean differences (95% CIs) of the effects of pasta in              |
| 23 | the context of low-GI dietary patterns on body weight (kg) continued (n = 2448)..... 42                           |
| 24 |                                                                                                                   |
| 25 | Supplemental Figure S12: A priori subgroup analyses on risk of bias for mean differences (95% CIs) of             |
| 26 | the effect of pasta in the context of low-GI dietary patterns on body weight (kg) (n = 2448) ..... 44             |
| 27 |                                                                                                                   |
| 28 | Supplemental Figure S13: Subgroup analysis for mean differences (95% CIs) of the effects of pasta in              |
| 29 | the context of low-GI dietary patterns on body mass index, BMI (kg/m <sup>2</sup> ) (n = 1038)..... 46            |
| 30 |                                                                                                                   |
| 31 | Supplemental Figure S14: Subgroup analysis for mean differences (95% CIs) of the effects of pasta in              |
| 32 | the context of low-GI dietary patterns on body mass index, BMI (kg/m <sup>2</sup> ) continued (n = 1038) ..... 48 |
| 33 |                                                                                                                   |
| 34 | Supplemental Figure S15: A priori subgroup analyses on risk of bias for mean differences (95% CIs) of             |
| 35 | the effect of pasta in the context of low-GI dietary patterns on body mass index, BMI (kg/m <sup>2</sup> ) (n =   |
| 36 | 1038) ..... 50                                                                                                    |
| 37 |                                                                                                                   |
| 38 | Supplemental Figure S16: Subgroup analysis for mean differences (95% CIs) of the effects of pasta in              |
| 39 | the context of low-GI dietary patterns on body fat (%) (n = 285) ..... 52                                         |
| 40 |                                                                                                                   |
| 41 | Supplemental Figure S17: A priori subgroup analyses on risk of bias for mean differences (95% CIs) of             |
| 42 | the effect of pasta in the context of low-GI dietary patterns on body fat (%) (n = 285)..... 54                   |
| 43 |                                                                                                                   |
| 44 | Supplemental Figure S18: Subgroup analysis for mean differences (95% CIs) of the effects of pasta in              |
| 45 | the context of low-GI dietary patterns on waist circumference (cm) (n = 1380)..... 56                             |
| 46 |                                                                                                                   |
| 47 | Supplemental Figure S19: Subgroup analysis for mean differences (95% CIs) of the effects of pasta in              |
| 48 | the context of low-GI dietary patterns on waist circumference (cm) continued (n = 1380)..... 58                   |
| 49 |                                                                                                                   |
| 50 | Supplemental Figure S20: A priori subgroup analyses on risk of bias for mean differences (95% CIs) of             |
| 51 | the effect of pasta in the context of low-GI dietary patterns on waist circumference (cm) (n = 1380). 60          |
| 52 |                                                                                                                   |
| 53 | Supplemental Figure S21: Continuous meta-regression of change in carbohydrate intake in the low-GI                |
| 54 | dietary pattern intervention arms with change in body weight (n=19) ..... 62                                      |
| 55 |                                                                                                                   |
| 56 |                                                                                                                   |
| 57 |                                                                                                                   |
| 58 |                                                                                                                   |
| 59 |                                                                                                                   |
| 60 |                                                                                                                   |

1  
2  
3  
4  
5  
6  
7  
8  
9  
10  
11  
12  
13  
14  
15  
16  
17  
18  
19  
20  
21  
22  
23  
24  
25  
26  
27  
28  
29  
30  
31  
32  
33  
34  
35  
36  
37  
38  
39  
40  
41  
42  
43  
44  
45  
46  
47  
48  
49  
50  
51  
52  
53  
54  
55  
56  
57  
58  
59  
60

Supplemental Figure S22: Continuous meta-regression of change in protein intake in the low-GI dietary pattern intervention arms with change in body weight (n=19) ..... 63

Supplemental Figure S23: Pasta intake dose-response analyses by spline curve modeling (MKSPLINE procedure) ..... 64

Supplemental Figure S24: Funnel plot for the effect of pasta in the context of low-GI dietary patterns on body weight (kg) ..... 65

Supplemental Figure S25: Funnel plot for the effect of pasta in the context of low-GI dietary patterns on BMI (kg/m<sup>2</sup>)..... 66

Supplemental Figure S26: Funnel plot for the effect of pasta in the context of low-GI dietary patterns on body fat (%)..... 67

Supplemental Figure S27: Funnel plot for the effect of pasta in the context of low-GI dietary patterns on waist circumference (cm) ..... 68

## Supplemental Tables

**Supplemental Table S1: Search strategy for studies assessing the effect of pasta in the context of low-GI dietary patterns on body weight in randomized controlled trials**

| Database | Search Period             | Search Terms                                                                                                                                                                                                                                                                                                                                                                                                                                                                                                                                                                                                                                                                                                                                     |
|----------|---------------------------|--------------------------------------------------------------------------------------------------------------------------------------------------------------------------------------------------------------------------------------------------------------------------------------------------------------------------------------------------------------------------------------------------------------------------------------------------------------------------------------------------------------------------------------------------------------------------------------------------------------------------------------------------------------------------------------------------------------------------------------------------|
| Medline  | 1946 to February 07, 2017 | <ol style="list-style-type: none"> <li>1. pasta/</li> <li>2. spaghetti/</li> <li>3. macaroni/</li> <li>4. lasagna/</li> <li>5. fusilli/</li> <li>6. noodle/</li> <li>7. glycaemic index.tw.</li> <li>8. glycemic index.tw.</li> <li>9. glycaemic ind*.tw.</li> <li>10. glycemic ind*.tw.</li> <li>11. glycemic load*.tw.</li> <li>12. glycaemic load*.tw.</li> <li>13. glycemic index/</li> <li>14. body mass index/</li> <li>15. body mass index.tw.</li> <li>16. BMI.tw.</li> <li>17. overweight.tw.</li> <li>18. weight*.tw.</li> <li>19. 1 or 2 or 3 or 4 or 5 or 6 or 7 or 8 or 9 or 10 or 11 or 12 or 13</li> <li>20. 14 or 15 or 16 or 17 or 18</li> <li>21. 19 and 20</li> <li>22. limit 21 to animals</li> <li>23. 21 not 22</li> </ol> |
| Embase   | 1946 to February 07, 2017 | <ol style="list-style-type: none"> <li>1. pasta/</li> <li>2. spaghetti/</li> <li>3. macaroni/</li> <li>4. lasagna/</li> <li>5. fusilli/</li> <li>6. noodle/</li> <li>7. glycaemic index.tw.</li> <li>8. glycemic index.tw.</li> <li>9. glycaemic ind*.tw.</li> <li>10. glycemic ind*.tw.</li> <li>11. glycemic load*.tw.</li> <li>12. glycaemic load*.tw.</li> <li>13. glycemic index/</li> <li>14. body mass index/</li> <li>15. body mass index.tw.</li> <li>16. BMI.tw.</li> </ol>                                                                                                                                                                                                                                                            |

|                      |                           |                                                                                                                                                                                                                                                                                                                                                                                                                                                                                                                                                                            |
|----------------------|---------------------------|----------------------------------------------------------------------------------------------------------------------------------------------------------------------------------------------------------------------------------------------------------------------------------------------------------------------------------------------------------------------------------------------------------------------------------------------------------------------------------------------------------------------------------------------------------------------------|
|                      |                           | <p>17. overweight.tw.<br/> 18. weight*.tw.<br/> 19. 1 or 2 or 3 or 4 or 5 or 6 or 7 or 8 or 9 or 10 or 11 or 12 or 13<br/> 20. 14 or 15 or 16 or 17 or 18<br/> 21. 19 and 20<br/> 22. limit 21 to animals<br/> 23. 21 not 22</p>                                                                                                                                                                                                                                                                                                                                           |
| The Cochrane Library | 1946 to February 07, 2017 | <p>1. pasta/<br/> 2. spaghetti/<br/> 3. macaroni/<br/> 4. lasagna/<br/> 5. fusilli/<br/> 6. noodle/<br/> 7. glycemic index/<br/> 8. glycaemic ind*.tw.<br/> 9. glycemic ind*.tw.<br/> 10. glycemic load*.tw.<br/> 11. glycaemic load*.tw.<br/> 12. exp body weight/<br/> 13. body weight*.tw.<br/> 14. BMI.tw.<br/> 15. body mass index/<br/> 16. body mass index.tw.<br/> 17. weight*.tw.<br/> 18. 1 or 2 or 3 or 4 or 5 or 6 or 7 or 8 or 9 or 10 or 11<br/> 19. 12 or 13 or 14 or 15 or 16 or 17<br/> 20. 18 and 19<br/> 21. limit 20 to animals<br/> 22. 20 not 21</p> |

Supplemental Table S2: PICO framework of the search strategy

| <b>PICO framework<sup>a</sup> defined in the present systematic review and meta-analysis</b> |                                                                                      |                                                                                     |                                                                                                   |
|----------------------------------------------------------------------------------------------|--------------------------------------------------------------------------------------|-------------------------------------------------------------------------------------|---------------------------------------------------------------------------------------------------|
| <b>Participants</b>                                                                          | <b>Interventions</b>                                                                 | <b>Comparators</b>                                                                  | <b>Outcomes</b>                                                                                   |
| Adult men and women excluding pregnant or breastfeeding women                                | Low glycemic index interventions where pasta is included as part of the intervention | Higher glycemic index diets where pasta is not included as part of the intervention | Body weight<br>Body mass index (BMI)<br>Body Fat (%)<br>Waist circumference<br>Waist-to-hip ratio |

a Moher D, Shamseer L, Clarke M, Ghersi D, Liberati A, Petticrew M, Shekelle P, Stewart LA and PRISMA-P Group. Preferred reporting items for systematic review and meta-analysis protocols (PRISMA-P) 2015 statement. Systematic Reviews 2015; 4:1. <https://doi.org/10.1186/2046-4053-4-1>



Supplement Table S3a: Trial characteristics

| Overweight/Obese Trials      |                |                              |                   |                                     |                                             |                               |                      |         |        |                   |                |                           |                                       |                           |
|------------------------------|----------------|------------------------------|-------------------|-------------------------------------|---------------------------------------------|-------------------------------|----------------------|---------|--------|-------------------|----------------|---------------------------|---------------------------------------|---------------------------|
| Study                        | Subjects       | Sample Description           | Mean Age (y) (SD) | Mean Baseline Body Weight (kg) (SD) | Mean Baseline BMI (kg/m <sup>2</sup> ) (SD) | Mean GI:GL of diet (SD) ¶ ¶ ¶ | Pasta Dose (serv/wk) | Setting | Design | Energy Balance§   | Duration (wks) | Diet Composition % (SD)§§ | Dietary Prescription                  | Funding Source            |
| Karl et al. 2015 †††         | 39 (19M:20F)** | OB, OP                       |                   |                                     |                                             |                               | 2.33                 | USA     | P      | Negative+ Neutral | 17             |                           | CR to 2/3kcal; Metabolic              | Agency                    |
| Low GI                       | 20             |                              | 56 (5)*           | 92.9 (13.6)*                        | 32.3 (3.4)*                                 | 42:133                        |                      |         |        |                   |                | 68:15:16                  |                                       |                           |
| Higher GI                    | 19             |                              | 56 (5)*           | 94 (9.7)*                           | 33.4 (2.6)*                                 | 61:201                        |                      |         |        |                   |                | 70:16:14                  |                                       |                           |
| Pereira et al. 2015          | 19 (4M:15F)**  | OW, IP/OP                    |                   |                                     |                                             |                               | NR                   | Brazil  | P      | Neutral           | 6.4            |                           | Ad libitum                            | Unknown                   |
| Low GI                       | 10             |                              | 28(5)             | 80.0(12.6)                          | 29.9 (2.1)                                  | 41.2(2.2) ¥ **                |                      |         |        |                   |                | 48.3:16.1:32.8            |                                       |                           |
| Higher GI                    | 9              |                              | 26(3)             | 79.1(12.2)                          | 29.1 (2.0)                                  | 74.1(2.9) ¥ **                |                      |         |        |                   |                | 54.6:12.7:34.4            |                                       |                           |
| Buscemi et al. 2013          | 40 (19M:21F)** | OW/OB, high CVD risk, OP     |                   |                                     |                                             |                               | NR                   | Italy   | P      | Negative          | 12             |                           | CR to 20kcal/kg/d; Ad libitum         | Unknown                   |
| Low GI                       | 19             |                              | 51 (8)            | 93.8 (17.3)                         | 34.3 (6.6)                                  | 48.1: 138                     |                      |         |        |                   |                | 56:18:26                  |                                       |                           |
| Higher GI                    | 21             |                              | 49 (8)            | 93.2 (14.4)                         | 34.5 (5.1)                                  | 59.3: 174                     |                      |         |        |                   |                | 57:16:27                  |                                       |                           |
| Costa et al. 2012            | 17 (7M:10F)    | OW, IP/OP                    | 25.4 (5.8)        | 84.1(16.3)                          | 26.3(3.2)                                   |                               | NR                   | Brazil  | C      | Neutral           | 4              |                           | Ab libitum,2 meals+3 fruit/d provided | NR                        |
| Low GI                       |                |                              |                   |                                     |                                             | 47.5(3.8)                     |                      |         |        |                   |                | 58.6:13.9:25.5            |                                       |                           |
| Higher GI                    |                |                              |                   |                                     |                                             | 61.6(2.8)                     |                      |         |        |                   |                | 55.4:14.2:30.3            |                                       |                           |
| Jebb et al. 2010 - High MUFA | 225**          | OH, some CV risk factors, OP | ~52               |                                     | ~28.5 <sup>+</sup>                          |                               | 1.75                 | UK      | P      | Neutral           | 24             |                           | Ad Libitum, key foods provided        | Agency, foods by industry |
| Low GI                       | 115            |                              |                   | 83.7 (69.6-93.1)¶¶¶                 |                                             | ~55.2                         |                      |         |        |                   |                | ~44.6:16.4:35.7****       |                                       |                           |
| Higher GI                    | 110            |                              |                   | 80.5 (70.0-92.1)¶¶¶                 |                                             | ~63.3                         |                      |         |        |                   |                | ~44.9:15.3:35.6****       |                                       |                           |
| Jebb et al. 2010 - Low Fat   | 250**          | OH, some CV risk factors, OP | ~52               |                                     | ~28.5 <sup>+</sup>                          |                               | 3.5                  | UK      | P      | Neutral           | 24             |                           | Ad Libitum, key foods provided        | Agency, foods by industry |
| Low GI                       | 117            |                              |                   | 79.4 (70.1- 91.8)¶¶¶                |                                             | ~56.3                         |                      |         |        |                   |                | ~51.5:14.2:26.1****       |                                       |                           |
| Higher GI                    | 111            |                              |                   | 80.7 (71.4- 91.4)¶¶¶                |                                             | ~64.4                         |                      |         |        |                   |                | ~51.1:15.7:27.5****       |                                       |                           |
| Larsen et al. 2010-High Pro  | 231**          | OW/OB, OP                    |                   |                                     | NR                                          |                               | NR                   | Europe  | P      | Neutral           | 26             |                           | Ad libitum                            | Agency                    |
| Low GI                       | 124            |                              | 42.1 (6.5)        | 88.5 (15.6)                         |                                             | ~56.5: 108.9                  |                      |         |        |                   |                | ~43:22:32                 |                                       |                           |
| Higher GI                    | 107            |                              | 42 (5.7)          | 89.5 (17.1)                         |                                             | ~61.4: 113.1                  |                      |         |        |                   |                | ~45:23:31                 |                                       |                           |
| Larsen et al. 2010 - Low Pro | 203 **         | OW/OB, OP                    |                   |                                     | NR                                          |                               | NR                   | Europe  | P      | Neutral           | 26             |                           | Ad libitum                            | Agency                    |
| Low GI                       | 106            |                              | 42.2 (5.7)        | 88.4 (15.7)                         |                                             | ~56.2: 121                    |                      |         |        |                   |                | ~51:18:30                 |                                       |                           |
| Higher GI                    | 97             |                              | 42 (5.9)          | 86.6 (13.8)                         |                                             | ~61.6: 137.9                  |                      |         |        |                   |                | ~51:17:31                 |                                       |                           |

Supplement Table S3b: Trial characteristics continued

| Overweight/Obese Trials continued |               |                         |                   |                                     |                                             |                                          |                      |         |        |                            |                |                                                     |                                           |                  |  |
|-----------------------------------|---------------|-------------------------|-------------------|-------------------------------------|---------------------------------------------|------------------------------------------|----------------------|---------|--------|----------------------------|----------------|-----------------------------------------------------|-------------------------------------------|------------------|--|
| Study                             | Subjects      | Sample Description      | Mean Age (y) (SD) | Mean Baseline Body Weight (kg) (SD) | Mean Baseline BMI (kg/m <sup>2</sup> ) (SD) | Mean GI:GL of diet (SD) ¶ ¶ ¶            | Pasta Dose (serv/wk) | Setting | Design | Energy Balance§            | Duration (wks) | Diet Composition % (SD)§§                           | Dietary Prescription                      | Funding Source   |  |
| Solomon et al. 2010               | 22 (8M:14F)** | OB, Pre-T2DM, OP        |                   |                                     |                                             |                                          | 7                    | USA     | P      | Neutral                    | 12             |                                                     | Metabolic plus exercise program           | Agency           |  |
| Low GI                            | 10 (3M:7F)    |                         | 67 (6)            | 97.4 (12.0)                         | 34.9 (1.1)                                  | 39.8 (0.9)                               |                      |         |        |                            |                | 54.7(0.3):28.3(0.3):17.0(0.3)                       |                                           |                  |  |
| Higher GI                         | 12 (5M:7F)    |                         | 64 (3)            | 94.7 (15.2)                         | 34.1 (1.1)                                  | 80.0 (2.1)                               |                      |         |        |                            |                | 55.6(0.7):27.8(0.7):16.6(0.3)                       |                                           |                  |  |
| Philippou et al. 2009- 6 mo       | 38**          | ≥1 CHD risk factors, OP | (35-65) ¶         |                                     |                                             |                                          | NR                   | UK      | P      | Negative (for all but n=2) | 24             |                                                     | 500kcal CR; Ad libitum                    | Agency           |  |
| Low GI                            | 22            |                         |                   | 91.3(14.8)***                       | 29.1 (3.6)***                               | 50.6 (4.6):<br>114.4(31.5)               |                      |         |        |                            |                |                                                     |                                           |                  |  |
| Higher GI                         | 16            |                         |                   | 97.5(16.4)***                       | 30.5 (3.5)***                               | 63.2(5.6):<br>175.0(45.6)                |                      |         |        |                            |                |                                                     |                                           |                  |  |
| Philippou et al. 2009- 4 mo       | 42**          | OW, OP                  | (18-65)¶          |                                     |                                             |                                          | NR                   | UK      | P      | Neutral                    | 16             |                                                     | Ad libitum                                | Unknown          |  |
| Low GI                            | 23            |                         |                   | 87.2 (15.3)                         | 32.5 (4.8)                                  | 49.7(5.7):89.7(27.5)                     |                      |         |        |                            |                | 47.6(6.7):19.5(4.2):31.8(5.8)                       |                                           |                  |  |
| Higher GI                         | 19            |                         |                   | 83.6 (13.4)                         | 31.3 (4.8)                                  | 63.7(9.4):136.8(56.3)                    |                      |         |        |                            |                | 48.9(7):19.3(4.9):30.9(9)                           |                                           |                  |  |
| Abete et al. 2008                 | 32 (18M:14F)  | OB, OP                  | 36(7)             |                                     |                                             |                                          | 2.33                 | Spain   | P      | Negative                   | 8              |                                                     | 30% CR; Ad libitum, 3-day menus           | Agency           |  |
| Low GI                            | 16            |                         |                   | 94.3(16.1)                          | 32.8 (4.3)                                  | (40-45)¶                                 |                      |         |        |                            |                | 50.2 (1.8):18.3(1.6):31.5(1.6)                      |                                           |                  |  |
| Higher GI                         | 16            |                         |                   | 94.4(13.1)                          | 32.2 (4.4)                                  | (60-65)¶                                 |                      |         |        |                            |                | 47.8(6.8):19.6(5.6):32.6(4.3)                       |                                           |                  |  |
| Aston et al. 2008                 | 19 (0M:19F)** | OW/OB, OP               | 51.9(7.6)         | 87.5 (15)                           | 33.1 (4.9)                                  |                                          | 3.33                 | UK      | C      | Neutral                    | 12             |                                                     | Ad libitum, key CHO foods provided        | Agency           |  |
| Low GI                            |               |                         |                   |                                     |                                             | 55.5(3.8):<br>133.8(22.9)*****           |                      |         |        |                            |                | 51.4(6.0):17.0(2.4):32.2(5.1)*<br>***               |                                           |                  |  |
| Higher GI                         |               |                         |                   |                                     |                                             | 63.9(3):<br>138.8(30.5)*****             |                      |         |        |                            |                | 47.6(6.1):17.6(3.3):34.1(5.7)*<br>***               |                                           |                  |  |
| Jensen et al. 2008                | 44 (0M:44F)** | OW, OP                  | (20-40)¶          |                                     |                                             |                                          | 3                    | Denmark | P      | Neutral                    | 10             |                                                     | Ad libitum, partial provision, menu plans | Agency, Industry |  |
| Low GI                            | 22 (0M:22F)   |                         |                   | 77.9(6.9)                           | 27.4 (1.5)                                  | 72¥                                      |                      |         |        |                            |                | ~57(5):17(0):23(5) ‡                                |                                           |                  |  |
| Higher GI                         | 22 (0M:22F)   |                         |                   | 80.2(1.4)                           | 27.6 (0.3)                                  | 95¥                                      |                      |         |        |                            |                | ~57(5):17(0):22(5) ‡                                |                                           |                  |  |
| Philippou et al. 2008             | 13 (5M:8F)**  | ≥1 CHD risk factors, OP |                   |                                     |                                             |                                          | NR                   | UK      | P      | Negative                   | 12             |                                                     | 500kcal CR; Ad libitum                    | Agency           |  |
| Low GI                            | 7 (3M:4F)     |                         | 54 (49-58)¶¶      | 81.5 (4.7)***                       | 28.7 (2.1)***                               | 51.3(51.0-52.0):<br>105.6 (76.9-110.1)¶¶ |                      |         |        |                            |                | 46.0(37.8-51.0): 17.1(15.7-17.4): 32.8(31.3-37.1)¶¶ |                                           |                  |  |
| Higher GI                         | 6 (2M:4F)     |                         | 45 (39-50)¶¶      | 89.7 (12.8)***                      | 31.5 (4.4)***                               | 59.3(59.2-64.0):<br>114.7(98.5-134.9)¶¶  |                      |         |        |                            |                | 49.4(47.8-51.7):19.6(14.0-23.1):29.2(25.2-34.5)¶¶   |                                           |                  |  |

1  
2  
3  
4  
5  
6  
7  
8  
9  
10  
11  
12  
13  
14  
15  
16  
17  
18  
19  
20  
21  
22  
23  
24  
25  
26  
27  
28  
29  
30  
31  
32  
33  
34  
35  
36  
37  
38  
39  
40  
41  
42  
43  
44  
45  
46  
47

**Supplement Table S3c: Trial characteristics continued**

| Overweight/Obese Trials continued        |                 |                    |                   |                                     |                                             |                               |                      |         |           |                 |                |                                  |                                                      |                                                             |
|------------------------------------------|-----------------|--------------------|-------------------|-------------------------------------|---------------------------------------------|-------------------------------|----------------------|---------|-----------|-----------------|----------------|----------------------------------|------------------------------------------------------|-------------------------------------------------------------|
| Study                                    | Subjects        | Sample Description | Mean Age (y) (SD) | Mean Baseline Body Weight (kg) (SD) | Mean Baseline BMI (kg/m <sup>2</sup> ) (SD) | Mean GI:GL of diet (SD) ¶ ¶ ¶ | Pasta Dose (serv/wk) | Setting | Design    | Energy Balance§ | Duration (wks) | Diet Composition % (SD)§§        | Dietary Prescription                                 | Funding Source                                              |
| Bellisile et al. 2007                    | 65 (0M:65F)**   | OW/OB, OP          |                   |                                     |                                             |                               |                      | NR      | France    | P               | Neutral        | 12                               |                                                      | Ad libitum<br>Industry                                      |
| Low GI                                   | 35              |                    | 46.1 (13.6)       | 80 (13.2)                           | 30.2 (4.1)                                  | na                            |                      |         |           |                 |                |                                  |                                                      |                                                             |
| Higher GI                                | 30              |                    | 45.3 (12.0)       | 79 (13.1)                           | 30.4 (4.4)                                  | na                            |                      |         |           |                 |                |                                  |                                                      |                                                             |
| de Rougemont et al. 2007                 | 38 (22M:16F)**  | OW, OP             |                   |                                     |                                             |                               | 2.8                  | France  | P         | Neutral         | 5              |                                  | Ad libitum, some foods provided                      | Agency, Industry                                            |
| Low GI                                   | 19              |                    | 36.3 (8.7)        | 77.2 (9.6)                          | 27.5 (1.3)                                  | 46.5 (1.3)                    |                      |         |           |                 |                | 42.6 (3.9):19.8 (1.7):37.7 (4.4) |                                                      |                                                             |
| Higher GI                                | 19              |                    | 40.4 (9.6)        | 77.3 (9.2)                          | 27.2 (1.3)                                  | 66.3 (2.6)                    |                      |         |           |                 |                | 44.1 (3.5):17.6 (1.7):38.4 (3.1) |                                                      |                                                             |
| Sichieri et al. 2007                     | 123 (0M:123F)** | OW, OP             |                   |                                     |                                             |                               |                      | NR      | Brazil    | P               | Negative       | 72                               | 100-300kcal CR; 6-d menu and exchange lists provided | Agency                                                      |
| Low GI                                   | 63              |                    | 37.2 (5.4)*       | 67.7 (6.6)*                         | na                                          | 21(38): 74(84)                |                      |         |           |                 |                | 59.5 (6.3): 13.3: 27.2(4.6)      |                                                      |                                                             |
| Higher GI                                | 60              |                    | 37.5 (5.6)*       | 68.5 (7.5)*                         | na                                          | 51(28): 199(43)               |                      |         |           |                 |                | 61.6 (6.2): 12.3: 26.1(4.7)      |                                                      |                                                             |
| McMillian-Price et al. 2006-High Carb    | 64(16M:48F)     | OW/OB, OP          |                   |                                     |                                             |                               |                      | NR      | Australia | P               | Negative       | 12                               |                                                      | Ad libitum, key foods and meals provided<br>Agency-Industry |
| Low GI                                   | 32              |                    | 30.5 (7.9)        | 87.1 (15.3)                         | 30.6 (4.5)                                  | 45 (6):89 (28)                |                      |         |           |                 |                | 56 (6):19 (0):22 (6)             |                                                      |                                                             |
| Higher GI                                | 32              |                    | 31.8 (9.6)        | 86 (10.7)                           | 30.9 (3.4)                                  | 70 (6):129 (45)               |                      |         |           |                 |                | 60 (6):18 (6):19 (6)             |                                                      |                                                             |
| McMillian-Price et al. 2006-High Protein | 65(15M:50F)     | OW/OB, OP          |                   |                                     |                                             |                               |                      | NR      | Australia | P               | Negative       | 12                               |                                                      | Ad libitum, key foods and meals provided<br>Agency-Industry |
| Low GI                                   | 33              |                    | 34.6 (8.6)        | 88.4 (17.2)                         | 32.1 (5.2)                                  | 44 (6):59 (23)                |                      |         |           |                 |                | 40 (11):26 (6):28 (6)            |                                                      |                                                             |
| Higher GI                                | 32              |                    | 30.2 (8.5)        | 87.7 (16.4)                         | 31.3 (4.5)                                  | 59 (6):75 (17)                |                      |         |           |                 |                | 42 (6):28 (6):27 (6)             |                                                      |                                                             |
| Wolever et al. 2002                      | 24 (5M:19F)**   | IGT, OP            |                   |                                     |                                             |                               |                      | NR      | Canada    | P               | Neutral        | 16                               |                                                      | Ad libitum, partial provision<br>Agency                     |
| Low GI                                   | 13(3M:10F)      |                    | 55.2 (10.8)       | 79.7 (13.1)***                      | 29.7 (4.3)                                  | 54.4 (2.5):91.8 (9.4)         |                      |         |           |                 |                | 54.8 (6.1):19.4 (1.8):24.7 (5.8) |                                                      |                                                             |
| Higher GI                                | 11(2M:9F)       |                    | 58.8 (13.3)       | 76.4 (20.4)***                      | 29.3 (7.3)                                  | 59.3 (2.0):96.8 (11.6)        |                      |         |           |                 |                | 52.8 (6.6):17.4 (2.3):27.9 (6.3) |                                                      |                                                             |

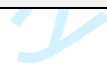

Supplement Table S3d: Trial characteristics continued

| Diabetes Trials     |                |                    |                   |                                     |                                             |                               |                      |         |                |                 |                |                                  |                      |                                               |                      |
|---------------------|----------------|--------------------|-------------------|-------------------------------------|---------------------------------------------|-------------------------------|----------------------|---------|----------------|-----------------|----------------|----------------------------------|----------------------|-----------------------------------------------|----------------------|
| Study               | Subjects       | Sample Description | Mean Age (y) (SD) | Mean Baseline Body Weight (kg) (SD) | Mean Baseline BMI (kg/m <sup>2</sup> ) (SD) | Mean GI:GL of diet (SD) ¶ ¶ ¶ | Pasta Dose (serv/wk) | Setting | Design         | Energy Balance§ | Duration (wks) | Diet Composition % (SD)§§        | Dietary Prescription | Funding Source                                |                      |
| Jenkins et al. 2014 | 141(77M:64F)   | T2DM, OP           |                   |                                     |                                             |                               |                      | NR      | Canada         | P               | Neutral        | 12                               |                      | Ad libitum, bread supplement                  | Industry Association |
| Low GI              | 70 (38M:32F)   |                    | 59 (10)           | 85 (20)                             | 30 (5)                                      | ~51:53                        |                      |         |                |                 |                | ~38.5:19.8:37.2                  |                      |                                               |                      |
| Higher GI           | 71 (39M:32F)   |                    | 59 (10)           | 84 (19)                             | 31 (6)                                      | ~62:89                        |                      |         |                |                 |                | ~49.2:19.8:27.4                  |                      |                                               |                      |
| Visek et al. 2014   | 20 (12M:8F)    | T2DM, OP           | 62.7 (5.8)        | 91.9 (14.1)                         | 32 (4.2)                                    |                               |                      | NR      | Czech Republic | C               | Neutral        | 12                               |                      | Ad libitum                                    | Agency               |
| Low GI              |                |                    |                   |                                     |                                             | 49 (48-51)¶¶¶                 |                      |         |                |                 |                | ~37.2:18.0:36.0                  |                      |                                               |                      |
| Higher GI           |                |                    |                   |                                     |                                             | 68 (61-72)¶¶¶                 |                      |         |                |                 |                | ~36.2:17.3:40.0                  |                      |                                               |                      |
| Jenkins et al. 2012 | 121 (61M: 60F) | T2DM, OP           |                   |                                     |                                             |                               |                      | NR      | Canada         | P               | Neutral        | 12                               |                      | Ad libitum                                    | Agency               |
| Low GI              | 60             |                    | 58 (10.1)         | 85.6 (20.1)                         | 31.4 (7.0)                                  | 47: 80                        |                      |         |                |                 |                | 45.4:22.8:30.5                   |                      |                                               |                      |
| Higher GI           | 61             |                    | 61 (7.8)          | 82.5 (17.2)                         | 29.9 (5.5)                                  | 58: 100                       |                      |         |                |                 |                | 48.3:21.4:28.5                   |                      |                                               |                      |
| Yusof et al. 2009   | 100**          | T2DM, OP           | NR                |                                     |                                             |                               |                      | NR      | Malaysia       | P               | Neutral        | 12                               |                      | Ad libitum, key foods provided to lowGI group | Agency               |
| Low GI              | 51             |                    |                   | 69.12 (13.33)                       | 27.05 (4.91)                                | 57(6): 108(32)                |                      |         |                |                 |                | 52(4):18(3):30(4)                |                      |                                               |                      |
| Higher GI           | 49             |                    |                   | 66.83 (11.50)                       | 26.79 (4.65)                                | 64(5): 131(30)                |                      |         |                |                 |                | 54(4):17(3):28(5)                |                      |                                               |                      |
| Jenkins et al 2008  | 210 (125M:82F) | T2DM, OP           |                   |                                     |                                             |                               |                      | NR      | Canada         | P               | Neutral        | 24                               |                      | Ad libitum                                    | Agency               |
| Low GI              | 106 (65M:41F)  |                    | 60 (10)           | 87.0 (20.0)                         | 30.6 (6.0)                                  | 49.4: 91.5                    |                      |         |                |                 |                | 44.0:21.2:33.3                   |                      |                                               |                      |
| Higher GI           | 104 (63M:41F)  |                    | 61 (9)            | 87.8 (19.4)                         | 31.2 (5.8)                                  | 59.3: 117.9                   |                      |         |                |                 |                | 47.5:20.7:30.5                   |                      |                                               |                      |
| Wolever et al. 2008 | 103            | T2DM, OW/OB, OP    |                   |                                     |                                             |                               |                      | NR      | Canada         | P               | Neutral        | 52                               |                      | Ad libitum, key foods provided                | Agency               |
| Low GI              | 55             |                    | 60.6 (7.5)*       | 81.1 (18.7)*                        | 31.6 (4.5)*                                 | 55.1 (3.0): 133 (14.8)        |                      |         |                |                 |                | 51.9 (6.7):20.6(3.0):26.5 (5.9)  |                      |                                               |                      |
| Higher GI           | 48             |                    | 60.4 (7.9)*       | 84.4(18.0)*                         | 30.1 (4.3)*                                 | 63.2 (2.8): 135 (20.8)        |                      |         |                |                 |                | 46.5 (6.2):20.4 (2.8):30.8 (4.8) |                      |                                               |                      |

Supplement Table S3e: Trial characteristics continued

| Diabetes Trials continued |                |                    |                   |                                     |                                             |                             |                      |         |           |                 |                |                                  |                      |                                                |                  |
|---------------------------|----------------|--------------------|-------------------|-------------------------------------|---------------------------------------------|-----------------------------|----------------------|---------|-----------|-----------------|----------------|----------------------------------|----------------------|------------------------------------------------|------------------|
| Study                     | Subjects       | Sample Description | Mean Age (y) (SD) | Mean Baseline Body Weight (kg) (SD) | Mean Baseline BMI (kg/m <sup>2</sup> ) (SD) | Mean GI:GL of diet (SD) ¶¶¶ | Pasta Dose (serv/wk) | Setting | Design    | Energy Balance§ | Duration (wks) | Diet Composition % (SD)§§        | Dietary Prescription | Funding Source                                 |                  |
| Jimenez-Cruz et al. 2003  | 14 (6M:8F)**   | T2DM, OP           | 59 (34)           |                                     |                                             |                             |                      | NR      | Mexico    | C               | Neutral        | 6                                |                      | Ad libitum                                     | Industry         |
| Low GI                    |                |                    |                   | 91.6 (24.3)                         | 32.4 (6.0)                                  | 44(3.4): 86(19.8)           |                      |         |           |                 |                | 60:21:23                         |                      |                                                |                  |
| Higher GI                 |                |                    |                   | 92.6 (25.4)                         | 32.3 (6.0)                                  | 56(4.9): 139(27.3)          |                      |         |           |                 |                | 64:18:20                         |                      |                                                |                  |
| Heilbronn et al. 2002     | 45 (23M:22F)** | T2DM, OW, OP       |                   |                                     |                                             |                             |                      | 3.5     | Australia | P               | Negative       | 8                                |                      | CR to1500kcal/d; Ad libitum, partial provision | Unknown          |
| Low GI                    | 24 (11M:13F)   |                    | 56.0(9.4)         | 91.7(16.2)                          |                                             | 43                          |                      |         |           |                 |                | 58.9 (2.9):22.2 (1.5):17.9 (3.9) |                      |                                                |                  |
| Higher GI                 | 21 (12M:9F)    |                    | 57.5(9.6)         | 93.2 (13.3)                         |                                             | 75                          |                      |         |           |                 |                | 60.8 (2.3):21.7 (0.9):17.1 (2.3) |                      |                                                |                  |
| Fontvieille et al. 1992   | 18 (12M:6F)    | T1DM/T2DM, OP      | 47.2(11.6)        |                                     | 24.8(2.6)                                   |                             |                      | 4.7     | France    | C               | Neutral        | 5                                |                      | Ad libitum                                     | Agency, Industry |
| Low GI                    |                |                    |                   |                                     |                                             | 38.1(5.3)                   |                      |         |           |                 |                | 45.8(7.2):18.0(2.5):36.2(6.8)    |                      |                                                |                  |
| Higher GI                 |                |                    |                   |                                     |                                             | 64.2(3.1)                   |                      |         |           |                 |                | 44.9(7.3):18.8(1.6):36.3(6.0)    |                      |                                                |                  |
| Fontvieille et al. 1988   | 8 (4M:4F)      | T1DM, OP           | 43.5 (9.9)        |                                     | 24.1 (6.8)                                  |                             |                      | 3.5     | France    | C               | Neutral        | 3                                |                      | Ad libitum, partial provision                  | Agency, Industry |
| Low GI                    |                |                    |                   |                                     |                                             | 46.5(2.5)                   |                      |         |           |                 |                | 46.1 (4.5):17.4 (1.4):35.0 (2.8) |                      |                                                |                  |
| Higher GI                 |                |                    |                   |                                     |                                             | 60.1 (5.1)                  |                      |         |           |                 |                | 45.4 (4.5):16.9 (1.7):36.0 (2.8) |                      |                                                |                  |
| <b>CHD Trial</b>          |                |                    |                   |                                     |                                             |                             |                      |         |           |                 |                |                                  |                      |                                                |                  |
| Frost et al. 2004         | 55 (48M:7F)**  | CHD, OP            |                   |                                     |                                             |                             |                      | NR      | UK        | P               | Neutral §§§    | 12                               |                      | Ad Libitum                                     | Unknown          |
| Low GI                    | 26 (23M:3F)    |                    | 63.6 (9.4)        | 81.2 (12.2)                         | 26.9 (3.3)                                  | 50(4):115(39)               |                      |         |           |                 |                | 49 (5):18 (5):31 (5)             |                      |                                                |                  |
| Higher GI                 | 29 (25M:4F)    |                    | 61.8 (9)          | 81.7 (16.7)                         | 28.7 (4.6)                                  | 57(4):106(34)               |                      |         |           |                 |                | 47 (10):18 (5):32 (10)           |                      |                                                |                  |

Abbreviations: BMI=Body Mass Index; C=Crossover design; Carb=Carbohydrate; CED= carbohydrate exchange diet; CHD= Coronary Heart Disease; CR= calorie restriction; CV=cardiovascular; GI= glycemic index; GL=glycemic load; IGT= impaired glucose tolerance; IP=inpatient; IR= insulin resistant; High Carb= high carbohydrate; HI= hyperinsulinemic; M = male; mo=months; MUFA=monounsaturated fatty acids; na=not available; T1DM=type 1 diabetes mellitus; T2DM = type 2 diabetes mellitus; OB= obese; OH=otherwise healthy; OP = outpatient; OW= overweight; P=Parallel design; SD= standard deviation; F = female; UK= United Kingdom; USA= United States of America; wks=weeks; y= years

§Negative energy balance diets were designed for weight loss, Neutral energy balance diets for weight maintenance, where all diets are isocaloric between test and control groups; §§Energy from carbohydrate: protein: fat for the planned diet or if not planned; §§§ Participants were advised to lose weight if they had a BMI>28kg/m2.

¶ Range of values; ¶¶ median and interquartile range (IQR); ¶¶¶ Actual GI/GL or if not available, planned;

\* Calculated before dropout; \*\*Completer Analysis, as used in data analysis; \*\*\* completer analysis, data obtained from authors; \*\*\*\* based on less participants than in analysis;

+ approximate based on all study arms; ¥ approximate based on test meals; ‡ approximate based on n=45 from Sloth et al. 2004, the original publication of this study;

‡‡‡ analysis includes weight loss and weight maintenance phases

**Supplemental Table S4: Sensitivity analysis of the systematic removal of each trial\***

|                              | MD [95% CI], P-value<br>I <sup>2</sup> , P-value |                                                  |                                                |                                               |                                                 |                                                 |
|------------------------------|--------------------------------------------------|--------------------------------------------------|------------------------------------------------|-----------------------------------------------|-------------------------------------------------|-------------------------------------------------|
|                              | Body Weight (kg)<br>N=32                         | BMI (kg/m <sup>2</sup> )<br>N=18                 | Body Fat (%)<br>N=10                           | Waist<br>Circumference<br>(cm)<br>N=18        | Waist-to-hip Ratio<br>N=6                       | Sagittal Abdominal<br>Diameter (cm)<br>N=3      |
| All studies                  | -0.63 [-0.84, -0.42],<br>P<0.01<br>0.00%, P=0.51 | -0.26 [-0.36, -0.16],<br>P<0.01<br>0.00%, P=0.91 | -0.01 [-0.58, 0.56],<br>P=0.98<br>65%, P=0.003 | -0.46 [-1.05, 0.14],<br>P=0.13<br>62%, P<0.01 | -0.00 [-0.01, 0.00],<br>P=0.27<br>0.00%, P=0.52 | -0.09 [-0.34, 0.16],<br>P=0.48<br>0.00%, P=0.92 |
| <b>Removal of:</b>           |                                                  |                                                  |                                                |                                               |                                                 |                                                 |
| OW/OB                        |                                                  |                                                  |                                                |                                               |                                                 |                                                 |
| Pereira et al. 2015          | -0.61 [-0.82, -0.39],<br>P<0.01<br>0.00%, P=0.54 | -0.24 [-0.34, -0.14],<br>P<0.01<br>0.00%, P=0.93 | 0.19 [-0.25, 0.63],<br>P=0.39<br>36%, P=0.13   | -0.37 [-1.04, 0.31],<br>P=0.28<br>62%, P<0.01 | -0.00 [-0.01, 0.01],<br>P=0.67<br>0.00%, P=0.58 | n/a                                             |
| Karl et al. 2015             | -0.62 [-0.83, -0.41],<br>P<0.01<br>0.00%, P=0.50 | -0.25 [-0.35, -0.16],<br>P<0.01<br>0.00%, P=0.91 | 0.10 [-0.51, 0.71],<br>P=0.74<br>64%, P<0.01   | n/a                                           | n/a                                             | n/a                                             |
| Buscemi et al. 2013          | -0.63 [-0.84, -0.42],<br>P<0.01<br>0.00%, P=0.46 | -0.26 [-0.36, -0.16],<br>P<0.01<br>0.00%, P=0.86 | -0.08 [-0.63, 0.48],<br>P=0.79<br>64%, P<0.01  | -0.46 [-1.06, 0.15],<br>P=0.14<br>64%, P<0.01 | n/a                                             | n/a                                             |
| Costa et al. 2012            | -0.62 [-0.84, -0.41],<br>P<0.01<br>0.00%, P=0.46 | -0.26 [-0.37, -0.16],<br>P<0.01<br>0.00%, P=0.86 | -0.06 [-0.73, 0.61],<br>P=0.86<br>66%, P<0.01  | -0.33 [-0.94, 0.28],<br>P=0.29<br>59%, P<0.01 | n/a                                             | n/a                                             |
| Jebb et al. 2010 - LowFat    | -0.63 [-0.84, -0.42],<br>P<0.01<br>0.00%, P=0.46 | n/a                                              | n/a                                            | n/a                                           | n/a                                             | n/a                                             |
| Larsen et al. 2010 - LowPro  | -0.60 [-0.81, -0.38],<br>P<0.01<br>0.00%, P=0.57 | n/a                                              | n/a                                            | -0.45 [-1.09, 0.18],<br>P=0.16<br>64%, P<0.01 | n/a                                             | -0.05 [-0.39, 0.29],<br>P=0.79<br>0.00%, P=0.86 |
| Jebb et al. 2010- HighMUFA   | -0.64 [-0.85, -0.43],<br>P<0.01<br>0.00%, P=0.65 | n/a                                              | n/a                                            | n/a                                           | n/a                                             | n/a                                             |
| Larsen et al. 2010 - HighPro | -0.62 [-0.83, -0.41],<br>P<0.01<br>0.00%, P=0.48 | n/a                                              | n/a                                            | -0.37 [-1.00, 0.26],<br>P=0.26<br>62%, P<0.01 | n/a                                             | -0.13 [-0.45, 0.19],<br>P=0.42<br>0.00%, P=0.92 |
| Solomon et al. 2010          | -0.63 [-0.84, -0.42],<br>P<0.01                  | -0.26 [-0.36, -0.16],<br>P<0.01                  | n/a                                            | n/a                                           | n/a                                             | n/a                                             |

1  
2  
3  
4  
5  
6  
7  
8  
9  
10  
11  
12  
13  
14  
15  
16  
17  
18  
19  
20  
21  
22  
23  
24  
25  
26  
27  
28  
29  
30  
31  
32  
33  
34  
35  
36  
37  
38  
39  
40  
41  
42  
43  
44  
45  
46  
47

|                                      |                                                  |                                                  |                                               |                                                            |                                                 |                                                 |
|--------------------------------------|--------------------------------------------------|--------------------------------------------------|-----------------------------------------------|------------------------------------------------------------|-------------------------------------------------|-------------------------------------------------|
|                                      | 0.00%, P=0.47                                    | 0.00%, P=0.88                                    |                                               |                                                            |                                                 |                                                 |
| Philippou et al. 2009 - 6mth         | -0.65 [-0.86, -0.44],<br>P<0.01<br>0.00%, P=0.59 | -0.28 [-0.37, -0.18],<br>P<0.01<br>0.00%, P=0.97 | -0.12 [-0.71, 0.48],<br>P=0.70<br>65%, P<0.01 | -0.55 [-1.15, 0.04],<br>P=0.07<br>61%, P<0.01              | n/a                                             | n/a                                             |
| Philippou et al. 2009 - 4mth         | -0.61 [-0.83, -0.40],<br>P<0.01<br>0.00%, P=0.48 | -0.25 [-0.35, -0.15],<br>P<0.01<br>0.00%, P=0.89 | -0.09 [-0.72, 0.54],<br>P=0.78<br>66%, P<0.01 | -0.44 [-1.08, 0.19],<br>P=0.17<br>64%, P<0.01              | n/a                                             | n/a                                             |
| Abete et al. 2008                    | -0.63 [-0.84, -0.42],<br>P<0.01<br>0.00%, P=0.47 | n/a                                              | n/a                                           | n/a                                                        | n/a                                             | n/a                                             |
| Philippou et al. 2008                | -0.62 [-0.83, -0.42],<br>P<0.01<br>0.00%, P=0.48 | -0.26 [-0.35, -0.16],<br>P<0.01<br>0.00%, P=0.89 | -0.06 [-0.68, 0.55],<br>P=0.84<br>68%, P<0.01 | -0.41 [-1.02, 0.19],<br>P=0.18<br>63%, P<0.01              | n/a                                             | n/a                                             |
| Aston et al. 2008                    | -0.66 [-0.87, -0.44],<br>P<0.01<br>0.00%, P=0.52 | n/a                                              | -0.00 [-0.70, 0.69],<br>P=0.99<br>68%, P<0.01 | -0.54 [-1.14, 0.07],<br>P=0.08<br>62%, P<0.01              | n/a                                             | n/a                                             |
| Jensen et al. 2008                   | -0.63 [-0.84, -0.42],<br>P<0.01<br>0.00%, P=0.46 | -0.27 [-0.36, -0.17],<br>P<0.01<br>0.00%, P=0.88 | n/a                                           | -0.44 [-1.05, 0.18],<br>P=0.16<br>64%, P<0.01              | -0.00 [-0.01, 0.00],<br>P=0.24<br>0.00%, P=0.41 | -0.09 [-0.35, 0.18],<br>P=0.51<br>0.00%, P=0.69 |
| de Rougemont et al. 2007             | -0.57 [-0.80, -0.34],<br>P<0.01<br>0.00%, P=0.53 | -0.25 [-0.36, -0.14],<br>P<0.01<br>0.00%, P=0.87 | 0.06 [-0.57, 0.70],<br>P=0.84<br>67%, P<0.01  | n/a                                                        | n/a                                             | n/a                                             |
| Sichieri et al. 2007                 | -0.66 [-0.88, -0.45],<br>P<0.01<br>0.00%, P=0.53 | n/a                                              | n/a                                           | n/a                                                        | n/a                                             | n/a                                             |
| Bellisle et al. 2007                 | -0.63 [-0.84, -0.42],<br>P<0.01<br>0.00%, P=0.47 | -0.26 [-0.36, -0.16],<br>P<0.01<br>0.00%, P=0.88 | n/a                                           | -0.47 [-1.08, 0.13],<br>P=0.13<br>64%, P<0.01              | -0.00 [-0.01, 0.00],<br>P=0.14<br>0.00%, P=0.70 | n/a                                             |
| McMillan-Price et al. 2006 - HighCHO | -0.61 [-0.82, -0.39],<br>P<0.01<br>0.00%, P=0.51 | n/a                                              | n/a                                           | -0.38 [-1.01, 0.25],<br>P=0.23<br>63%, P<0.01              | n/a                                             | n/a                                             |
| McMillan-Price et al. 2006 - HighPro | -0.70 [-0.91, -0.49],<br>P<0.01<br>0.00%, P=0.91 | n/a                                              | n/a                                           | <b>-0.62 [-1.19, -0.05],<br/>P=0.03<br/>55%, P&lt;0.01</b> | n/a                                             | n/a                                             |
| Wolever et al. 2002                  | -0.63 [-0.84, -0.42],<br>P<0.01<br>0.00%, P=0.46 | n/a                                              | n/a                                           | n/a                                                        | n/a                                             | n/a                                             |
| Diabetes:                            |                                                  |                                                  |                                               |                                                            |                                                 |                                                 |
| Visek et al. 2014                    | -0.63 [-0.84, -0.42],<br>P<0.01                  | -0.26 [-0.36, -0.16],<br>P<0.01                  | 0.01 [-0.57, 0.60],<br>P=0.96                 | n/a                                                        | n/a                                             | n/a                                             |

|                          |                                                  |                                                  |             |                                                         |                                                 |     |
|--------------------------|--------------------------------------------------|--------------------------------------------------|-------------|---------------------------------------------------------|-------------------------------------------------|-----|
|                          | 0.00%, P=0.46                                    | 0.00%, P=0.86                                    | 68%, P<0.01 |                                                         |                                                 |     |
| Jenkins et al. 2014      | -0.66 [-0.88, -0.43],<br>P<0.01<br>0.00%, P=0.47 | -0.29 [-0.39, -0.18],<br>P<0.01<br>0.00%, P=0.94 | n/a         | <b>-0.61 [-1.18, -0.04],<br/>P=0.04<br/>50%, P=0.01</b> | -0.00 [-0.01, 0.00],<br>P=0.21<br>0.00%, P=0.43 | n/a |
| Jenkins et al. 2012      | -0.62 [-0.84, -0.40],<br>P<0.01<br>0.00%, P=0.46 | -0.25 [-0.35, -0.15],<br>P<0.01<br>0.00%, P=0.87 | n/a         | -0.44 [-1.05, 0.17],<br>P=0.16<br>64%, P<0.01           | -0.00 [-0.01, 0.01],<br>P=0.64<br>0.00%, P=0.53 | n/a |
| Yusof et al. 2009        | -0.63 [-0.84, -0.42],<br>P<0.01<br>0.00%, P=0.46 | -0.26 [-0.36, -0.16],<br>P<0.01<br>0.00%, P=0.87 | n/a         | -0.33 [-0.95, 0.28],<br>P=0.29<br>58%, P<0.01           | n/a                                             | n/a |
| Jenkins et al. 2008      | -0.61 [-0.83, -0.40],<br>P<0.01<br>0.00%, P=0.48 | -0.25 [-0.36, -0.15],<br>P<0.01<br>0.00%, P=0.87 | n/a         | n/a                                                     | n/a                                             | n/a |
| Wolever et al. 2008      | -0.64 [-0.84, -0.43],<br>P<0.01<br>0.00%, P=0.57 | n/a                                              | n/a         | -0.50 [-1.10, 0.09],<br>P=0.10<br>62%, P<0.01           | n/a                                             | n/a |
| Jimenez-Cruz et al. 2003 | -0.63 [-0.84, -0.42],<br>P<0.01<br>0.00%, P=0.46 | -0.26 [-0.35, -0.16],<br>P<0.01<br>0.00%, P=0.86 | n/a         | n/a                                                     | n/a                                             | n/a |
| Heilbronn et al. 2002    | -0.63 [-0.84, -0.42],<br>P<0.01<br>0.00%, P=0.47 | n/a                                              | n/a         | n/a                                                     | n/a                                             | n/a |
| Fontvieille et al. 1992  | -0.63 [-0.84, -0.42],<br>P<0.01<br>0.00%, P=0.46 | n/a                                              | n/a         | n/a                                                     | n/a                                             | n/a |
| Fontvielle et al. 1988   | -0.63 [-0.84, -0.42],<br>P<0.01<br>0.00%, P=0.46 | n/a                                              | n/a         | n/a                                                     | n/a                                             | n/a |
| CHD                      |                                                  |                                                  |             |                                                         |                                                 |     |
| Frost et al. 2004        | -0.63 [-0.84, -0.42],<br>P<0.01<br>0.00%, P=0.47 | -0.26 [-0.36, -0.17],<br>P<0.01<br>0.00%, P=0.89 | n/a         | -0.48 [-1.09, 0.12],<br>P=0.12<br>63%, P<0.01           | -0.00 [-0.01, 0.00],<br>P=0.25<br>1%, P=0.40    | n/a |

\*Sensitivity analysis included the removal of each single study from the meta-analyses one at a time and the summary effect was recalculated. An influential outlier was considered a study whose removal changed the magnitude of the pooled effect by >10%.

BMI, body mass index; CHD, coronary heart disease; CHO, carbohydrate; CI, confidence interval; MD, mean difference; mnth, month; MUFA, monounsaturated fatty acids; n/a, not applicable; OB, obese; OW, overweight; Pro, protein



1  
2  
3  
4  
5  
6  
7  
8  
9  
10  
11  
12  
13  
14  
15  
16  
17  
18  
19  
20  
21  
22  
23  
24  
25  
26  
27  
28  
29  
30  
31  
32  
33  
34  
35  
36  
37  
38  
39  
40  
41  
42  
43  
44  
45  
46  
47

**Supplemental Table S5: Sensitivity analyses of the use of correlation coefficients of 0.25 and 0.75 for crossover trials**

| Outcome (no. crossover trials/total)  | MD (95% CI), P-value<br>I <sup>2</sup> , P-value        |                                                         |                                               |
|---------------------------------------|---------------------------------------------------------|---------------------------------------------------------|-----------------------------------------------|
|                                       | Correlation Coefficient<br>used in the Primary Analysis | Correlation Coefficient used in<br>Sensitivity Analyses |                                               |
|                                       | 0.5                                                     | 0.25                                                    | 0.75                                          |
| Body Weight, kg (6*/32)               | -0.63 [-0.84, -0.42], P<0.01<br>0.00%, P=0.51           | -0.63 [-0.84, -0.42], P<0.01<br>0.00%, P=0.51           | -0.63 [-0.84, -0.43], P<0.01<br>0.00%, P=0.51 |
| BMI, kg/m <sup>2</sup> (3/18)         | -0.26 [-0.36, -0.16], P<0.01<br>0.00%, P=0.91           | -0.26 [-0.36, -0.16], P<0.01<br>0.00%, P=0.90           | -0.26 [-0.35, -0.17], P<0.01<br>0.00%, P=0.90 |
| Body Fat, % (3*/10)                   | -0.01 [-0.58, 0.56], P=0.98<br>65%, P<0.01              | -0.00 [-0.58, 0.58], P=0.99<br>64%, P<0.01              | -0.02 [-0.57, 0.54], P=0.96<br>66%, P<0.01    |
| Waist Circumference, cm (2*/18)       | -0.46 [-1.05, 0.14], P=0.13<br>62%, P<0.01              | -0.44 [-1.04, 0.15], P=0.14<br>60%, P<0.01              | -0.46 [-1.07, 0.14], P=0.13<br>65%, P<0.01    |
| Waist-to-hip Ratio (0/6)              | -0.00 [-0.01, 0.00], P=0.27<br>0.00%, P=0.52            | n/a                                                     | n/a                                           |
| Sagittal Abdominal Diameter, cm (0/6) | -0.09 [-0.34, 0.16], P=0.48<br>0.00%, P=0.92            | n/a                                                     | n/a                                           |

\* one of these crossover trials, however, did not require the use of a correlation coefficient as complete data was available

BMI, body mass index; CI, confidence interval; MD, mean difference; no., number

Supplement Table S6. Continuous meta-regression analysis for the effect of pasta in the context of low-GI dietary patterns on body weight (kg)<sup>1</sup>

| Subgroup                                 | Range                         | No. trials | N    | $\beta$ (95% CI)     | Residual I <sup>2</sup> | P value      |
|------------------------------------------|-------------------------------|------------|------|----------------------|-------------------------|--------------|
| Baseline BMI                             | 24.1 – 37.1 kg/m <sup>2</sup> | 32         | 2448 | -0.04 (-0.13, 0.06)  | 0.00%                   | 0.454        |
| Follow-up                                | 3 – 72 wks                    | 32         | 2448 | 0.01 (-0.01, 0.02)   | 0.00%                   | 0.314        |
| Dose Pasta                               | 1.75 – 7.0 serv/wk            | 11         | 740  | 0.29 (-0.91, 1.50)   | 0.00%                   | 0.595        |
| GI <sup>3</sup>                          | 21 - 72                       | 31         | 2383 | -0.01 (-0.04, 0.02)  | 0.45%                   | 0.482        |
| Difference in GI <sup>2</sup>            | 4.9 - 40.2                    | 31         | 2383 | -0.00 (-0.04, 0.03)  | 2.75%                   | 0.811        |
| Fiber <sup>3</sup>                       | 8.0 - 39.4g/d                 | 27         | 1851 | 0.02 (-0.01, 0.06)   | 0.00%                   | 0.221        |
| Change in Fiber <sup>4</sup>             | -7.5 - +13.8g/d               | 17         | 1571 | -0.02 (-0.07, 0.04)  | 23.13%                  | 0.595        |
| Difference in Fiber <sup>2</sup>         | -8.5 - +15.3g/d               | 27         | 1851 | -0.01 (-0.06, 0.04)  | 0.00%                   | 0.701        |
| Saturated Fat <sup>3</sup>               | 5.1 - 12.5%                   | 14         | 1396 | -0.05 (-0.30, 0.20)  | 34.32%                  | 0.648        |
| Change in Saturated Fat <sup>4</sup>     | -8.2 - -1.2%                  | 12         | 1309 | -0.01 (-0.29, 0.28)  | 46.27%                  | 0.965        |
| Difference in Saturated Fat <sup>2</sup> | -2.0 - +2.3%                  | 14         | 1396 | -0.34 (-1.08, 0.39)  | 32.80%                  | 0.329        |
| CHO <sup>3</sup>                         | 37.2 - 68.0%                  | 30         | 2345 | -0.01 (-0.05, 0.03)  | 0.00%                   | 0.541        |
| Change in CHO <sup>4</sup>               | -7.2 - +10.1%                 | 19         | 2046 | -0.07 (-0.12, -0.01) | 0.00%                   | <b>0.016</b> |
| Difference in CHO <sup>2</sup>           | -11.1 - +5.4%                 | 30         | 2345 | 0.02 (-0.05, 0.10)   | 0.00%                   | 0.547        |
| Protein <sup>3</sup>                     | 13.3 - 26.1%                  | 30         | 2345 | 0.04 (-0.04, 0.12)   | 0.00%                   | 0.332        |

1  
2  
3  
4  
5  
6  
7  
8  
9  
10  
11  
12  
13  
14  
15  
16  
17  
18  
19  
20  
21  
22  
23  
24  
25  
26  
27  
28  
29  
30  
31  
32  
33  
34  
35  
36  
37  
38  
39  
40  
41  
42  
43  
44  
45  
46  
47

|                                    |               |    |      |                     |        |              |
|------------------------------------|---------------|----|------|---------------------|--------|--------------|
| Change in Protein <sup>4</sup>     | -0.5 - +8.6%  | 19 | 2046 | 0.15 (0.03, 0.27)   | 0.00%  | <b>0.017</b> |
| Difference in Protein <sup>2</sup> | -2.5 - +3.4%  | 30 | 2345 | -0.18 (-0.38, 0.02) | 0.00%  | 0.069        |
| Fat <sup>3</sup>                   | 16.0 - 37.7%  | 30 | 2345 | 0.01 (-0.05, 0.06)  | 0.00%  | 0.852        |
| Change in Fat <sup>4</sup>         | -12.2 - +5.4% | 19 | 2046 | 0.05 (-0.02, 0.12)  | 17.73% | 0.122        |
| Difference in Fat <sup>2</sup>     | -4.4 - +10.6% | 30 | 2345 | 0.02 (-0.05, 0.09)  | 0.00%  | 0.610        |

1 Data is presented as between group mean difference (95% CI) for a 1-unit change in the predictor variable.  $\beta$ -coefficients were estimated using continuous meta-regression analysis. A positive  $\beta$ -coefficient implies an increase in body weight on the pasta/low-GI intervention as the subgroup variable increases, and a negative  $\beta$ -coefficient implies a decrease in body weight. Residual  $I^2$  reports inter-study heterogeneity not explained by the subgroup and was estimated using the Cochran's Q statistic.

- 2 Difference in diet variable between the intervention and control arms
- 3 Intake at the end of study in the intervention arm
- 4 Change in intake from end of study from baseline in intervention arm

BMI, body mass index; CHO, carbohydrate; GI, glycemic index

**Supplemental Table S7. Continuous meta-regression analysis for the effect of pasta in the context of low-GI dietary patterns on BMI (kg/m<sup>2</sup>)<sup>1</sup>**

| Subgroup                                  | Range                         | No. trials | N    | $\beta$ (95% CI)    | Residual I <sup>2</sup> | P value |
|-------------------------------------------|-------------------------------|------------|------|---------------------|-------------------------|---------|
| Baseline BMI                              | 26.3 – 37.1 kg/m <sup>2</sup> | 18         | 1038 | -0.01 (-0.06, 0.03) | 0.00%                   | 0.559   |
| Follow-up                                 | 4 – 24 wks                    | 18         | 1038 | 0.00 (-0.01, 0.02)  | 0.00%                   | 0.559   |
| Dose Pasta*                               | 2.33 – 7.0 serv/wk            | 4          | 143  |                     |                         |         |
| GI <sup>3</sup>                           | 39.8 - 72                     | 17         | 973  | 0.01 (-0.01, 0.03)  | 0.00%                   | 0.153   |
| Difference in GI <sup>2</sup>             | 7.0 - 40.2                    | 17         | 973  | -0.01 (-0.03, 0.01) | 0.00%                   | 0.275   |
| Fiber <sup>3</sup>                        | 8.0 - 39.4g/d                 | 16         | 935  | 0.01 (-0.01, 0.02)  | 0.00%                   | 0.366   |
| Change in Fiber <sup>4</sup>              | -1.8 - +12.4g/d               | 10         | 758  | 0.00 (-0.03, 0.03)  | 0.00%                   | 0.846   |
| Difference in Fiber <sup>2</sup>          | -4.9 - +13.0g/d               | 16         | 935  | -0.00 (-0.02, 0.02) | 0.00%                   | 0.821   |
| Saturated Fat* <sup>3</sup>               | 7.6 - 12.5%                   | 7          |      |                     |                         |         |
| Change in Saturated Fat* <sup>4</sup>     | -2.4 - -1.2%                  | 6          |      |                     |                         |         |
| Difference in Saturated Fat* <sup>2</sup> | -1.0 - +2.3%                  | 7          |      |                     |                         |         |
| CHO <sup>3</sup>                          | 37.2 - 68.0%                  | 16         | 935  | -0.00 (-0.02, 0.01) | 0.00%                   | 0.594   |
| Change in CHO <sup>4</sup>                | -5.6 - +3.2%                  | 10         | 758  | -0.02 (-0.06, 0.02) | 0.00%                   | 0.325   |
| Difference in CHO <sup>2</sup>            | -11.1 - +2.0%                 | 16         | 935  | -0.01 (-0.03, 0.02) | 0.00%                   | 0.531   |
| Protein <sup>3</sup>                      | 13.9 – 22.8%                  | 16         | 935  | 0.00 (-0.04, 0.04)  | 0.00%                   | 0.905   |

1  
2  
3  
4  
5  
6  
7  
8  
9  
10  
11  
12  
13  
14  
15  
16  
17  
18  
19  
20  
21  
22  
23  
24  
25  
26  
27  
28  
29  
30  
31  
32  
33  
34  
35  
36  
37  
38  
39  
40  
41  
42  
43  
44  
45  
46  
47

|                                    |               |    |     |                     |       |       |
|------------------------------------|---------------|----|-----|---------------------|-------|-------|
| Change in Protein <sup>4</sup>     | -0.2 - +3.0%  | 10 | 758 | 0.01 (-0.11, 0.14)  | 0.00% | 0.786 |
| Difference in Protein <sup>2</sup> | -2.5 - +3.4%  | 16 | 935 | -0.03 (-0.12, 0.06) | 0.00% | 0.441 |
| Fat <sup>3</sup>                   | 16.0 - 37.7%  | 16 | 935 | 0.00 (-0.02, 0.02)  | 0.00% | 0.717 |
| Change in Fat <sup>4</sup>         | -4.8 - +5.4%  | 10 | 758 | 0.02 (-0.02, 0.06)  | 0.00% | 0.240 |
| Difference in Fat <sup>2</sup>     | -4.4 - +10.6% | 16 | 935 | 0.01 (-0.01, 0.04)  | 0.00% | 0.299 |

\*For Dose, there were <10 trials so subgroup analyses were not performed.

1 Data is presented as between group mean difference (95% CI) for a 1-unit change in the predictor variable.  $\beta$ -coefficients were estimated using continuous meta-regression analysis. A positive  $\beta$ -coefficient implies an increase in BMI on the pasta/low-GI intervention as the subgroup variable increases, and a negative  $\beta$ -coefficient implies a decrease in BMI. Residual  $I^2$  reports inter-study heterogeneity not explained by the subgroup and was estimated using the Cochran’s Q statistic.

2 Difference in diet variable between the intervention and control arms

3 Intake at the end of study in the intervention arm

4 Change in intake from end of study from baseline in intervention arm

BMI, body mass index; CHO, carbohydrate; GI, glycemic index; wk, week

**Supplemental Table S8. Continuous meta-regression analysis for the effect of pasta in the context of low-GI dietary patterns on body fat (%)<sup>1</sup>**

| Subgroup                                  | Range                         | No. trials | N   | $\beta$ (95% CI)     | Residual I <sup>2</sup> | P value      |
|-------------------------------------------|-------------------------------|------------|-----|----------------------|-------------------------|--------------|
| Baseline BMI                              | 26.3 – 36.0 kg/m <sup>2</sup> | 10         | 285 | -0.02 (-0.26, 0.23)  | 67.69%                  | 0.890        |
| Follow-up                                 | 4 – 24 wks                    | 10         | 285 | 0.06 (-0.06, 0.17)   | 66.00%                  | 0.303        |
| Dose Pasta*                               | 2.33 - 3.33 serv/wk           | 3          | 96  |                      |                         |              |
| GI <sup>3</sup>                           | 39.8 - 72                     | 10         | 285 | 0.12 (-0.00, 0.25)   | 52.21%                  | 0.053        |
| Difference in GI <sup>2</sup>             | 7.0 - 40.2                    | 10         | 285 | -0.09 (-0.15, -0.03) | 19.39%                  | <b>0.008</b> |
| Fiber* <sup>3</sup>                       | 8.0 - 39.4g/d                 | 8          | 228 |                      |                         |              |
| Change in Fiber* <sup>4</sup>             | -1.8 - +12.4g/d               | 4          | 87  |                      |                         |              |
| Difference in Fiber* <sup>2</sup>         | -4.9 - +13.0g/d               | 8          | 228 |                      |                         |              |
| Saturated Fat* <sup>3</sup>               | 7.6 - 12.5%                   | 3          | 93  |                      |                         |              |
| Change in Saturated Fat* <sup>4</sup>     | -2.4 - -1.2%                  | 2          | 51  |                      |                         |              |
| Difference in Saturated Fat* <sup>2</sup> | -1.0 - +2.3%                  | 3          | 93  |                      |                         |              |
| CHO* <sup>3</sup>                         | 37.2 - 68.0%                  | 9          | 247 |                      |                         |              |
| Change in CHO* <sup>4</sup>               | -5.6 - +3.2%                  | 4          | 87  |                      |                         |              |
| Difference in CHO* <sup>2</sup>           | -11.1 - +2.0%                 | 9          | 247 |                      |                         |              |
| Protein* <sup>3</sup>                     | 13.9 – 22.8%                  | 9          | 247 |                      |                         |              |

1  
2  
3  
4  
5  
6  
7  
8  
9  
10  
11  
12  
13  
14  
15  
16  
17  
18  
19  
20  
21  
22  
23  
24  
25  
26  
27  
28  
29  
30  
31  
32  
33  
34  
35  
36  
37  
38  
39  
40  
41  
42  
43  
44  
45  
46  
47

|                                     |               |   |     |  |  |  |
|-------------------------------------|---------------|---|-----|--|--|--|
| Change in Protein* <sup>4</sup>     | -0.2 - +3.0%  | 4 | 87  |  |  |  |
| Difference in Protein* <sup>2</sup> | -2.5 - +3.4%  | 9 | 247 |  |  |  |
| Fat* <sup>3</sup>                   | 16.0 - 37.7%  | 9 | 247 |  |  |  |
| Change in Fat* <sup>4</sup>         | -4.8 - +5.4%  | 4 | 87  |  |  |  |
| Difference in Fat* <sup>2</sup>     | -4.4 - +10.6% | 9 | 247 |  |  |  |

\*There were <10 trials so subgroup analyses were not performed.

1 Data is presented as between group mean difference (95% CI) for a 1-unit change in the predictor variable.  $\beta$ -coefficients were estimated using continuous meta-regression analysis. A positive  $\beta$ -coefficient implies an increase in body fat on the pasta/low-GI intervention as the subgroup variable increases, and a negative  $\beta$ -coefficient implies a decrease in body fat. Residual  $I^2$  reports inter-study heterogeneity not explained by the subgroup and was estimated using the Cochran’s Q statistic.

- 2 Difference in diet variable between the intervention and control arms
- 3 Intake at the end of study in the intervention arm
- 4 Change in intake from end of study from baseline in intervention arm

BMI, body mass index; CHO, carbohydrate; GI, glycemic index; wk, week

**Supplemental Table S9. Continuous meta-regression analysis for the effect of pasta in the context of low-GI dietary patterns on waist circumference (cm)<sup>1</sup>**

| Subgroup                                  | Range                         | No. trials | N    | $\beta$ (95% CI)     | Residual I <sup>2</sup> | P value      |
|-------------------------------------------|-------------------------------|------------|------|----------------------|-------------------------|--------------|
| Baseline BMI                              | 26.3 – 36.0 kg/m <sup>2</sup> | 18         | 1380 | 0.10 (-0.13, 0.32)   | 59.02%                  | 0.372        |
| Follow-up                                 | 4 – 52 wks                    | 18         | 1380 | 0.05 (-0.03, 0.13)   | 60.50%                  | 0.225        |
| Dose Pasta*                               | 3.0 – 3.33 serv/wk            | 2          | 63   |                      |                         |              |
| GI <sup>3</sup>                           | 41.2 – 72.0                   | 17         | 1315 | -0.01 (-0.12, 0.10)  | 66.00%                  | 0.841        |
| Difference in GI <sup>2</sup>             | 4.9 – 32.9                    | 17         | 1315 | -0.02 (-0.10, 0.06)  | 64.51%                  | 0.596        |
| Fiber <sup>3</sup>                        | 8.0 - 39.4g/d                 | 15         | 1258 | 0.05 (-0.05, 0.14)   | 59.60%                  | 0.342        |
| Change in Fiber <sup>4</sup>              | -1.8 - +13.8g/d               | 13         | 1176 | 0.01 (-0.17, 0.20)   | 70.59%                  | 0.861        |
| Difference in Fiber <sup>2</sup>          | -4.9 - +15.3g/d               | 15         | 1258 | -0.00 (-0.14, 0.13)  | 64.86%                  | 0.939        |
| Saturated Fat* <sup>3</sup>               | 6.1 – 10.1%                   | 8          | 604  |                      |                         |              |
| Change in Saturated Fat* <sup>4</sup>     | -7.6 - -1.2%                  | 7          | 562  |                      |                         |              |
| Difference in Saturated Fat* <sup>2</sup> | -2.0 - +2.3%                  | 8          | 604  |                      |                         |              |
| CHO <sup>3</sup>                          | 38.5 - 58.6%                  | 16         | 1277 | -0.11 (-0.19, -0.04) | 27.06%                  | <b>0.007</b> |
| Change in CHO <sup>4</sup>                | -7.2 - +10.1%                 | 13         | 1176 | -0.09 (-0.23, 0.04)  | 57.19%                  | 0.148        |
| Difference in CHO <sup>2</sup>            | -11.1 - +5.4%                 | 16         | 1277 | -0.01 (-0.18, 0.17)  | 60.81%                  | 0.947        |
| Protein <sup>3</sup>                      | 13.9 – 26.1%                  | 16         | 1277 | 0.20 (0.01, 0.38)    | 43.92%                  | <b>0.038</b> |



1  
2  
3  
4  
5  
6  
7  
8  
9  
10  
11  
12  
13  
14  
15  
16  
17  
18  
19  
20  
21  
22  
23  
24  
25  
26  
27  
28  
29  
30  
31  
32  
33  
34  
35  
36  
37  
38  
39  
40  
41  
42  
43  
44  
45  
46  
47

|                                    |               |    |      |                     |        |       |
|------------------------------------|---------------|----|------|---------------------|--------|-------|
| Change in Protein <sup>4</sup>     | -0.3 - +8.6%  | 13 | 1176 | 0.19 (-0.09, 0.46)  | 63.38% | 0.165 |
| Difference in Protein <sup>2</sup> | -2.5 - +3.4%  | 16 | 1277 | -0.14 (-0.66, 0.38) | 62.79% | 0.570 |
| Fat <sup>3</sup>                   | 22.0 - 37.2%  | 16 | 1277 | 0.10 (-0.05, 0.26)  | 53.48% | 0.185 |
| Change in Fat <sup>4</sup>         | -12.2 - +5.4% | 13 | 1176 | 0.08 (-0.07, 0.24)  | 61.15% | 0.274 |
| Difference in Fat <sup>2</sup>     | -4.4 - +10.6% | 16 | 1277 | 0.09 (-0.06, 0.25)  | 47.17% | 0.220 |

\*There were <10 trials so subgroup analyses were not performed.

1 Data is presented as between group mean difference (95% CI) for a 1-unit change in the predictor variable.  $\beta$ -coefficients were estimated using continuous meta-regression analysis. A positive  $\beta$ -coefficient implies an increase in waist circumference on the pasta/low-GI intervention as the subgroup variable increases, and a negative  $\beta$ -coefficient implies a decrease in waist circumference. Residual  $I^2$  reports inter-study heterogeneity not explained by the subgroup and was estimated using the Cochran's Q statistic.

- 2 Difference in diet variable between the intervention and control arms
- 3 Intake at the end of study in the intervention arm
- 4 Change in intake from end of study from baseline in intervention arm

BMI, body mass index; CHO, carbohydrate; GI, glycemic index; wk, week

**Supplementary Table S10. Post-hoc piecewise linear continuous dose-response meta-regression analyses for the effect of pasta intake in the context of low-GI dietary patterns on body weight (kg)**

| Dose threshold of servings of pasta consumed per week | Dose ranges of servings of pasta consumed per week | $\beta$ (95% CIs) * | Residual $I^2$ † | $p$ -value |
|-------------------------------------------------------|----------------------------------------------------|---------------------|------------------|------------|
| 3.0                                                   | $\leq 3.0$                                         | -0.70 (-3.27, 1.86) | 0.00%            | 0.890      |
|                                                       | $> 3.0$                                            | 0.91 (-0.89, 2.70)  |                  |            |
| 3.33                                                  | $\leq 3.33$                                        | 0.05 (-1.80, 1.89)  | 0.00%            | 0.518      |
|                                                       | $> 3.33$                                           | 0.44 (-1.75, 2.63)  |                  |            |
| 3.5                                                   | $\leq 3.5$                                         | 0.09 (-1.65, 1.82)  | 0.00%            | 0.888      |
|                                                       | $> 3.5$                                            | 0.46 (-1.89, 2.81)  |                  |            |

\*  $\beta$  is the slope derived from the piecewise linear meta-regression analyses and represents the treatment effect on body weight for doses above and below each dose-threshold representing servings of pasta consumption per week; † The residual  $I^2$  value indicates heterogeneity unexplained by each dose-threshold.

Supplementary Table S11: GRADE assessment of study quality

| Quality assessment*                                     |                   |              |                      |                      |             |                  | № of patients  |                | Effect                                               | Quality Importance                                                                |
|---------------------------------------------------------|-------------------|--------------|----------------------|----------------------|-------------|------------------|----------------|----------------|------------------------------------------------------|-----------------------------------------------------------------------------------|
| № of studies                                            | Design            | Risk of bias | Inconsistency        | Indirectness         | Imprecision | Publication Bias | Pasta/LGI diet | Higher GI diet | Absolute (95% CI)                                    |                                                                                   |
| <b>Body Weight (follow up: median 12 weeks)</b>         |                   |              |                      |                      |             |                  |                |                |                                                      |                                                                                   |
| 32                                                      | randomised trials | not serious  | not serious          | serious <sup>a</sup> | not serious | none             | 1294           | 1228           | MD <b>-0.63 kg</b><br>(-0.84 to -0.42)               | ⊕⊕⊕○<br>MODERATE <sup>a</sup><br>Due to downgrade for indirectness                |
| <b>BMI (follow up: median 12 weeks)</b>                 |                   |              |                      |                      |             |                  |                |                |                                                      |                                                                                   |
| 18                                                      | randomised trials | not serious  | not serious          | serious <sup>a</sup> | not serious | none             | 551            | 538            | MD <b>-0.26 kg/m<sup>2</sup></b><br>(-0.36 to -0.16) | ⊕⊕⊕○<br>MODERATE <sup>a</sup><br>Due to downgrade for indirectness                |
| <b>Waist Circumference (follow up: median 12 weeks)</b> |                   |              |                      |                      |             |                  |                |                |                                                      |                                                                                   |
| 18                                                      | randomised trials | not serious  | serious <sup>b</sup> | serious <sup>a</sup> | not serious | none             | 717            | 624            | MD <b>-0.46 cm</b><br>(-1.05 to 0.14)                | ⊕⊕○○<br>LOW <sup>a,b</sup><br>Due to downgrade for inconsistency and indirectness |

| Quality assessment*                                             |                   |              |                      |                      |             |                   | № of patients  |                | Effect                                | Quality Importance                                                                |
|-----------------------------------------------------------------|-------------------|--------------|----------------------|----------------------|-------------|-------------------|----------------|----------------|---------------------------------------|-----------------------------------------------------------------------------------|
| № of studies                                                    | Design            | Risk of bias | Inconsistency        | Indirectness         | Imprecision | Publication Bias  | Pasta/LGI diet | Higher GI diet | Absolute (95% CI)                     |                                                                                   |
| <b>Body Fat (follow up: median 12 weeks)</b>                    |                   |              |                      |                      |             |                   |                |                |                                       |                                                                                   |
| 10                                                              | randomised trials | not serious  | serious <sup>c</sup> | serious <sup>a</sup> | not serious | none              | 176            | 165            | MD <b>-0.01 %</b><br>(-0.58 to 0.56)  | ⊕⊕○○<br>LOW <sup>a,c</sup><br>Due to downgrade for inconsistency and indirectness |
| <b>Waist-to-hip Ratio (follow up: median 12 weeks)</b>          |                   |              |                      |                      |             |                   |                |                |                                       |                                                                                   |
| 6                                                               | randomised trials | not serious  | not serious          | serious <sup>a</sup> | not serious | none <sup>d</sup> | 223            | 222            | MD <b>-0.00</b><br>(-0.01 to 0.00)    | ⊕⊕⊕○<br>MODERATE <sup>a</sup><br>Due to downgrade for indirectness                |
| <b>Sagittal Abdominal Diameter (follow up: median 26 weeks)</b> |                   |              |                      |                      |             |                   |                |                |                                       |                                                                                   |
| 3                                                               | randomised trials | not serious  | not serious          | serious <sup>a</sup> | not serious | none <sup>d</sup> | 237            | 214            | MD <b>-0.09 cm</b><br>(-0.34 to 0.16) | ⊕⊕⊕○<br>MODERATE <sup>a</sup><br>Due to downgrade for indirectness                |

1  
2  
3 CI, Confidence interval; GI, glycemic index; LGI, low glycemic index; MD, Mean difference  
4

5 \*All outcomes started with high quality evidence since all studies were randomized controlled trials. Risk of Bias –We rated down for  
6 risk of bias if the majority of studies were considered to be at high risk of bias. Inconsistency – We assessed inconsistency using  $I^2$   
7 estimates where an  $I^2$  of 50% or higher indicates substantial heterogeneity.  $I^2$  is the percentage of variability in the treatment estimates  
8 that is attributable to heterogeneity between studies. We rated down for inconsistency if there was substantial heterogeneity that was  
9 unexplained by any a priori sensitivity or subgroup analyses. Indirectness – We rated down for indirectness if there were factors  
10 present relating to the population, interventions, and outcomes that limited the generalizability of the results. Imprecision – We rated  
11 down for imprecision if the 95% confidence interval (95% CI) crossed the minimally important difference (MID) for harm. MID used  
12 for each outcome are: 0.5kg for body weight (based on Johnston et al. JAMA 2014;312(9):923-33); 0.2kg/m<sup>2</sup> for BMI; 2.0cm for  
13 waist circumference; 2.0% for body fat; 0.02 for waist-to-hip ratio; 2.0cm for sagittal abdominal diameter.  
14  
15

16  
17 a. Downgrade for serious indirectness, since most of the available trials did not quantify the amount of pasta consumed in the context  
18 of the low-GI dietary patterns  
19

20 b. Downgrade for serious inconsistency, as there was evidence of substantial inter-study ( $I^2=62%$ , P-heterogeneity<0.001), which  
21 could not be explained  
22

23 c. Downgrade for serious inconsistency, as there was evidence of substantial inter-study ( $I^2= 65%$ , P-heterogeneity=0.003), which  
24 could not be explained  
25

26 d. No downgrade for publication bias, as publication bias could not be assessed due to lack of power for assessing funnel plot  
27 asymmetry and small study effects (<10 trials included in the meta-analysis)  
28  
29  
30  
31  
32  
33  
34  
35  
36  
37  
38  
39  
40  
41  
42  
43  
44  
45  
46  
47

## Supplemental Table S12: PRISMA Checklist

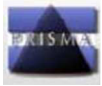

## PRISMA 2009 Checklist

| Section/topic             | # | Checklist item                                                                                                                                                                                                                                                                                              | Reported on page #         |
|---------------------------|---|-------------------------------------------------------------------------------------------------------------------------------------------------------------------------------------------------------------------------------------------------------------------------------------------------------------|----------------------------|
| <b>TITLE</b>              |   |                                                                                                                                                                                                                                                                                                             |                            |
| Title                     | 1 | Identify the report as a systematic review, meta-analysis, or both.                                                                                                                                                                                                                                         | 1                          |
| <b>ABSTRACT</b>           |   |                                                                                                                                                                                                                                                                                                             |                            |
| Structured summary        | 2 | Provide a structured summary including, as applicable: background; objectives; data sources; study eligibility criteria, participants, and interventions; study appraisal and synthesis methods; results; limitations; conclusions and implications of key findings; systematic review registration number. | 2-3                        |
| <b>INTRODUCTION</b>       |   |                                                                                                                                                                                                                                                                                                             |                            |
| Rationale                 | 3 | Describe the rationale for the review in the context of what is already known.                                                                                                                                                                                                                              | 4                          |
| Objectives                | 4 | Provide an explicit statement of questions being addressed with reference to participants, interventions, comparisons, outcomes, and study design (PICOS).                                                                                                                                                  | 4                          |
| <b>METHODS</b>            |   |                                                                                                                                                                                                                                                                                                             |                            |
| Protocol and registration | 5 | Indicate if a review protocol exists, if and where it can be accessed (e.g., Web address), and, if available, provide registration information including registration number.                                                                                                                               | 5                          |
| Eligibility criteria      | 6 | Specify study characteristics (e.g., PICOS, length of follow-up) and report characteristics (e.g., years considered, language, publication status) used as criteria for eligibility, giving rationale.                                                                                                      | 5-6, Supplemental Table S2 |
| Information sources       | 7 | Describe all information sources (e.g., databases with dates of coverage, contact with study authors to identify additional studies) in the search and date last searched.                                                                                                                                  | 5, Supplemental Table S1   |
| Search                    | 8 | Present full electronic search strategy for at least one database, including any limits used, such that it could be repeated.                                                                                                                                                                               | Supplemental Table S1      |

1  
2  
3  
4  
5  
6  
7  
8  
9  
10  
11  
12  
13  
14  
15  
16  
17  
18  
19  
20  
21  
22  
23  
24  
25  
26  
27  
28  
29  
30  
31  
32  
33  
34  
35  
36  
37  
38  
39  
40  
41  
42  
43  
44  
45  
46  
47

|                                    |    |                                                                                                                                                                                                                        |                          |
|------------------------------------|----|------------------------------------------------------------------------------------------------------------------------------------------------------------------------------------------------------------------------|--------------------------|
| Study selection                    | 9  | State the process for selecting studies (i.e., screening, eligibility, included in systematic review, and, if applicable, included in the meta-analysis).                                                              | 5, Figure 1              |
| Data collection process            | 10 | Describe method of data extraction from reports (e.g., piloted forms, independently, in duplicate) and any processes for obtaining and confirming data from investigators.                                             | 6                        |
| Data items                         | 11 | List and define all variables for which data were sought (e.g., PICOS, funding sources) and any assumptions and simplifications made.                                                                                  | 6, Supplemental Table S2 |
| Risk of bias in individual studies | 12 | Describe methods used for assessing risk of bias of individual studies (including specification of whether this was done at the study or outcome level), and how this information is to be used in any data synthesis. | 6                        |
| Summary measures                   | 13 | State the principal summary measures (e.g., risk ratio, difference in means).                                                                                                                                          | 7                        |
| Synthesis of results               | 14 | Describe the methods of handling data and combining results of studies, if done, including measures of consistency (e.g., $I^2$ ) for each meta-analysis.                                                              | 7-9                      |

| Section/topic               | #  | Checklist item                                                                                                                                                  | Reported on page #                        |
|-----------------------------|----|-----------------------------------------------------------------------------------------------------------------------------------------------------------------|-------------------------------------------|
| Risk of bias across studies | 15 | Specify any assessment of risk of bias that may affect the cumulative evidence (e.g., publication bias, selective reporting within studies).                    | 9                                         |
| Additional analyses         | 16 | Describe methods of additional analyses (e.g., sensitivity or subgroup analyses, meta-regression), if done, indicating which were pre-specified.                | 7-8                                       |
| <b>RESULTS</b>              |    |                                                                                                                                                                 |                                           |
| Study selection             | 17 | Give numbers of studies screened, assessed for eligibility, and included in the review, with reasons for exclusions at each stage, ideally with a flow diagram. | 9-11, Figure 1                            |
| Study characteristics       | 18 | For each study, present characteristics for which data were extracted (e.g., study size, PICOS, follow-up period) and provide the citations.                    | 10-11, Table 1, Supplemental Tables S2-S3 |
| Risk of bias within studies | 19 | Present data on risk of bias of each study and, if available, any outcome level assessment (see item 12).                                                       | 11, Supplemental Figures S1-S2            |

|                               |    |                                                                                                                                                                                                          |                                                                |
|-------------------------------|----|----------------------------------------------------------------------------------------------------------------------------------------------------------------------------------------------------------|----------------------------------------------------------------|
| Results of individual studies | 20 | For all outcomes considered (benefits or harms), present, for each study: (a) simple summary data for each intervention group (b) effect estimates and confidence intervals, ideally with a forest plot. | 11-12, Figures 2-3, Supplemental Figures S3-S7                 |
| Synthesis of results          | 21 | Present results of each meta-analysis done, including confidence intervals and measures of consistency.                                                                                                  | 11-12, Figures 2-3, Supplemental Figures S3-S7                 |
| Risk of bias across studies   | 22 | Present results of any assessment of risk of bias across studies (see Item 15).                                                                                                                          | 11, Supplemental Table S1, S2, S12, S15, S17, S20              |
| Additional analysis           | 23 | Give results of additional analyses, if done (e.g., sensitivity or subgroup analyses, meta-regression [see Item 16]).                                                                                    | 12-15, Supplemental Tables S4-S10, Supplemental Figures S8-S26 |
| <b>DISCUSSION</b>             |    |                                                                                                                                                                                                          |                                                                |
| Summary of evidence           | 24 | Summarize the main findings including the strength of evidence for each main outcome; consider their relevance to key groups (e.g., healthcare providers, users, and policy makers).                     | 16-19                                                          |
| Limitations                   | 25 | Discuss limitations at study and outcome level (e.g., risk of bias), and at review-level (e.g., incomplete retrieval of identified research, reporting bias).                                            | 19-21                                                          |
| Conclusions                   | 26 | Provide a general interpretation of the results in the context of other evidence, and implications for future research.                                                                                  | 21-22                                                          |
| <b>FUNDING</b>                |    |                                                                                                                                                                                                          |                                                                |
| Funding                       | 27 | Describe sources of funding for the systematic review and other support (e.g., supply of data); role of funders for the systematic review.                                                               | 25-26                                                          |

From: Moher D, Liberati A, Tetzlaff J, Altman DG, The PRISMA Group (2009). Preferred Reporting Items for Systematic Reviews and Meta-Analyses: The PRISMA Statement. *PLoS Med* 6(7): e1000097. doi:10.1371/journal.pmed1000097

For more information, visit: [www.prisma-statement.org](http://www.prisma-statement.org).



### Supplemental Figures

|                             | Random Sequence Generation | Allocation Concealment | Blinding of Participants, Personnel and Outcome Assessment | Incomplete Outcome Data | Selective Reporting |                                     | Random Sequence Generation | Allocation Concealment | Blinding of Participants, Personnel and Outcome Assessment | Incomplete Outcome Data | Selective Reporting |
|-----------------------------|----------------------------|------------------------|------------------------------------------------------------|-------------------------|---------------------|-------------------------------------|----------------------------|------------------------|------------------------------------------------------------|-------------------------|---------------------|
| Abete et al. 2008           | ?                          | ?                      | ?                                                          | +                       | +                   | Jimenez-Cruz et al. 2003            | ?                          | ?                      | ?                                                          | ?                       | +                   |
| Aston et al. 2008           | +                          | ?                      | +                                                          | +                       | +                   | Karl et al. 2015                    | +                          | +                      | +                                                          | +                       | +                   |
| Bellisle et al. 2007        | ?                          | ?                      | ?                                                          | ?                       | +                   | Larsen et al. 2010 -LowPro          | +                          | +                      | +                                                          | +                       | +                   |
| Buscemi et al. 2012         | +                          | +                      | +                                                          | ?                       | +                   | Larsen et al. 2010 -HighPro         | +                          | +                      | +                                                          | +                       | +                   |
| Cost et al. 2012            | ?                          | ?                      | +                                                          | +                       | +                   | McMillan-Price et al. 2006- HighCHO | ?                          | ?                      | +                                                          | +                       | +                   |
| de Rougemont et al. 2007    | ?                          | +                      | +                                                          | +                       | +                   | McMillan-Price et al. 2006- HighPro | ?                          | ?                      | +                                                          | +                       | +                   |
| Fontvielle et al. 1992      | ?                          | ?                      | +                                                          | +                       | +                   | Pereira et al. 2015                 | ?                          | ?                      | +                                                          | ?                       | +                   |
| Fontvielle et al. 1988      | ?                          | ?                      | +                                                          | +                       | +                   | Philippou et al. 2008               | ?                          | ?                      | +                                                          | ?                       | +                   |
| Frost et al. 2004           | ?                          | ?                      | +                                                          | +                       | +                   | Philippou et al. 2009-4mo           | ?                          | ?                      | +                                                          | ?                       | +                   |
| Heilbronn et al. 2002       | ?                          | ?                      | +                                                          | ?                       | +                   | Philippou et al. 2009-6mo           | ?                          | ?                      | ?                                                          | ?                       | +                   |
| Jebb et al. 2010 - HighMUFA | +                          | ?                      | +                                                          | ?                       | +                   | Sicheri et al. 2007                 | +                          | ?                      | +                                                          | ?                       | +                   |
| Jebb et al. 2010 - LowFat   | +                          | ?                      | +                                                          | ?                       | +                   | Solomon et al. 2010                 | ?                          | ?                      | +                                                          | +                       | +                   |
| Jenkins et al. 2014         | +                          | +                      | +                                                          | +                       | +                   | Visek et al. 2014                   | ?                          | ?                      | +                                                          | +                       | +                   |
| Jenkins et al. 2012         | +                          | +                      | +                                                          | +                       | +                   | Wolever et al. 2008                 | +                          | +                      | ?                                                          | +                       | +                   |
| Jenkins et al. 2008         | +                          | +                      | +                                                          | +                       | +                   | Wolever et al. 2002                 | +                          | +                      | +                                                          | +                       | +                   |
| Jensen et al. 2008          | ?                          | ?                      | +                                                          | +                       | +                   | Yusof et al. 2009                   | +                          | ?                      | +                                                          | +                       | +                   |

**Supplemental Figure S1: Cochrane risk of bias summary for all included trials**  
 Summary of risk of bias ratings for each individual study included in the meta-analysis.

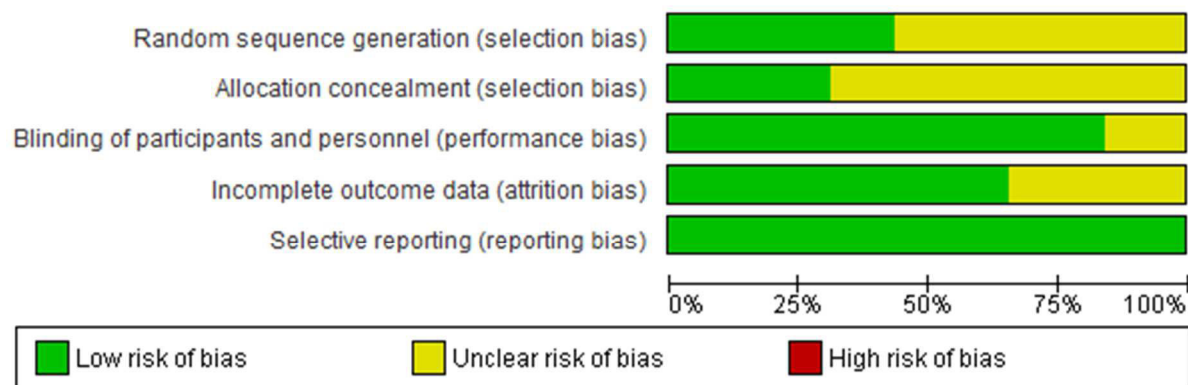

**Supplemental Figure S2: Risk of bias proportion graph for all included trials**

Peer review only

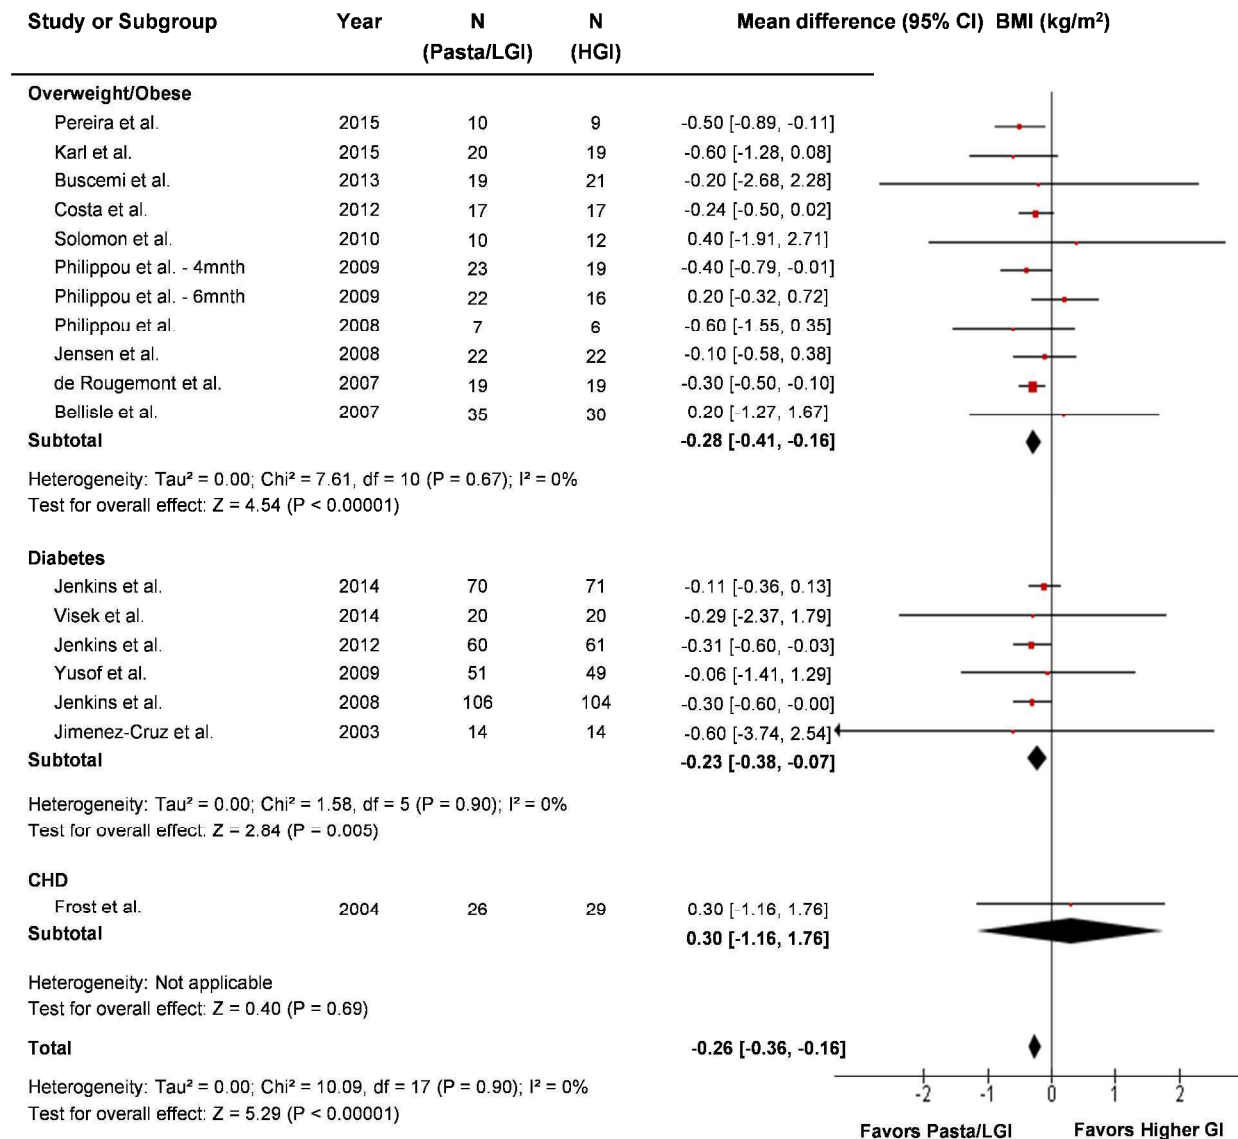

### Supplemental Figure S3: Forest plot of randomized controlled trials investigating the effects of pasta in the context of low-GI dietary patterns on BMI (kg/m<sup>2</sup>) (n= 1038)

Data are expressed as mean differences represented by a square and 95% CIs by the line through the square. 95% CIs exceeding the plot's bounds are represented by an arrowhead. Pooled effect estimates are represented by diamonds and were estimated with the use of generic inverse variance random effects models. Between-study heterogeneity was detected with the use of the Cochran's Q statistic at a significance level of  $P < 0.10$  and quantified with the use of the  $I^2$  statistic where  $I^2 \geq 50\%$  is considered to be evidence of substantial heterogeneity and  $\geq 75\%$  considerable heterogeneity.

BMI, body mass index; CHD, coronary heart disease; CI, confidence interval; HGI, higher glycemic index diet; GI, glycemic index; LGI, low glycemic index diet

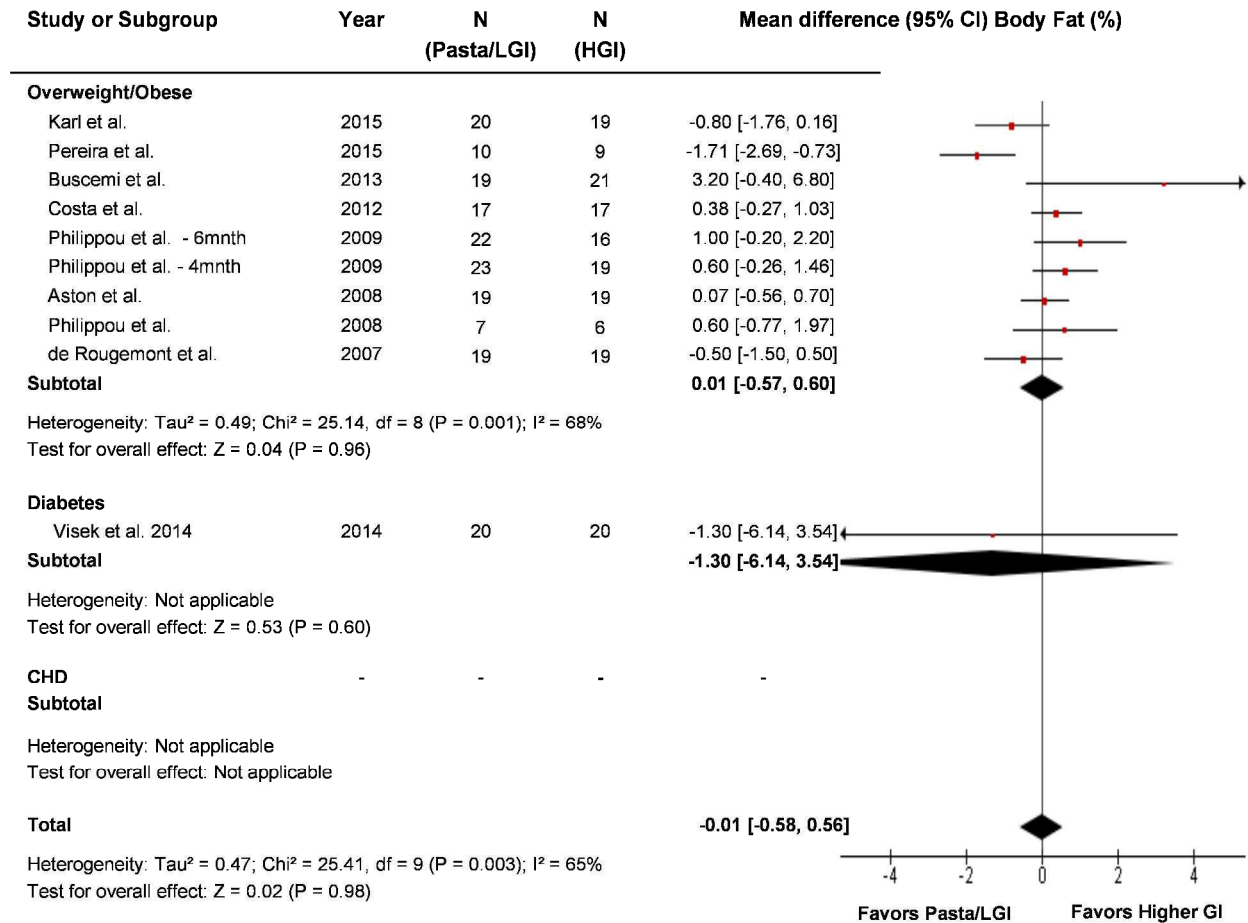

**Supplemental Figure S4: Forest plot of randomized controlled trials investigating the effects of pasta in the context of low-GI dietary patterns on body fat (%) (n= 285)**

Data are expressed as mean differences represented by a square and 95% CIs by the line through the square. 95% CIs exceeding the plot’s bounds are represented by an arrowhead. Pooled effect estimates are represented by diamonds and were estimated with the use of generic inverse variance random effects models. Between-study heterogeneity was detected with the use of the Cochran’s Q statistic at a significance level of P<0.10 and quantified with the use of the I<sup>2</sup> statistic where I<sup>2</sup>≥50% is considered to be evidence of substantial heterogeneity and ≥75% considerable heterogeneity.

CHD, coronary heart disease; CI, confidence interval; HGI, higher glycemic index diet; GI, glycemic index; LGI, low glycemic index diet

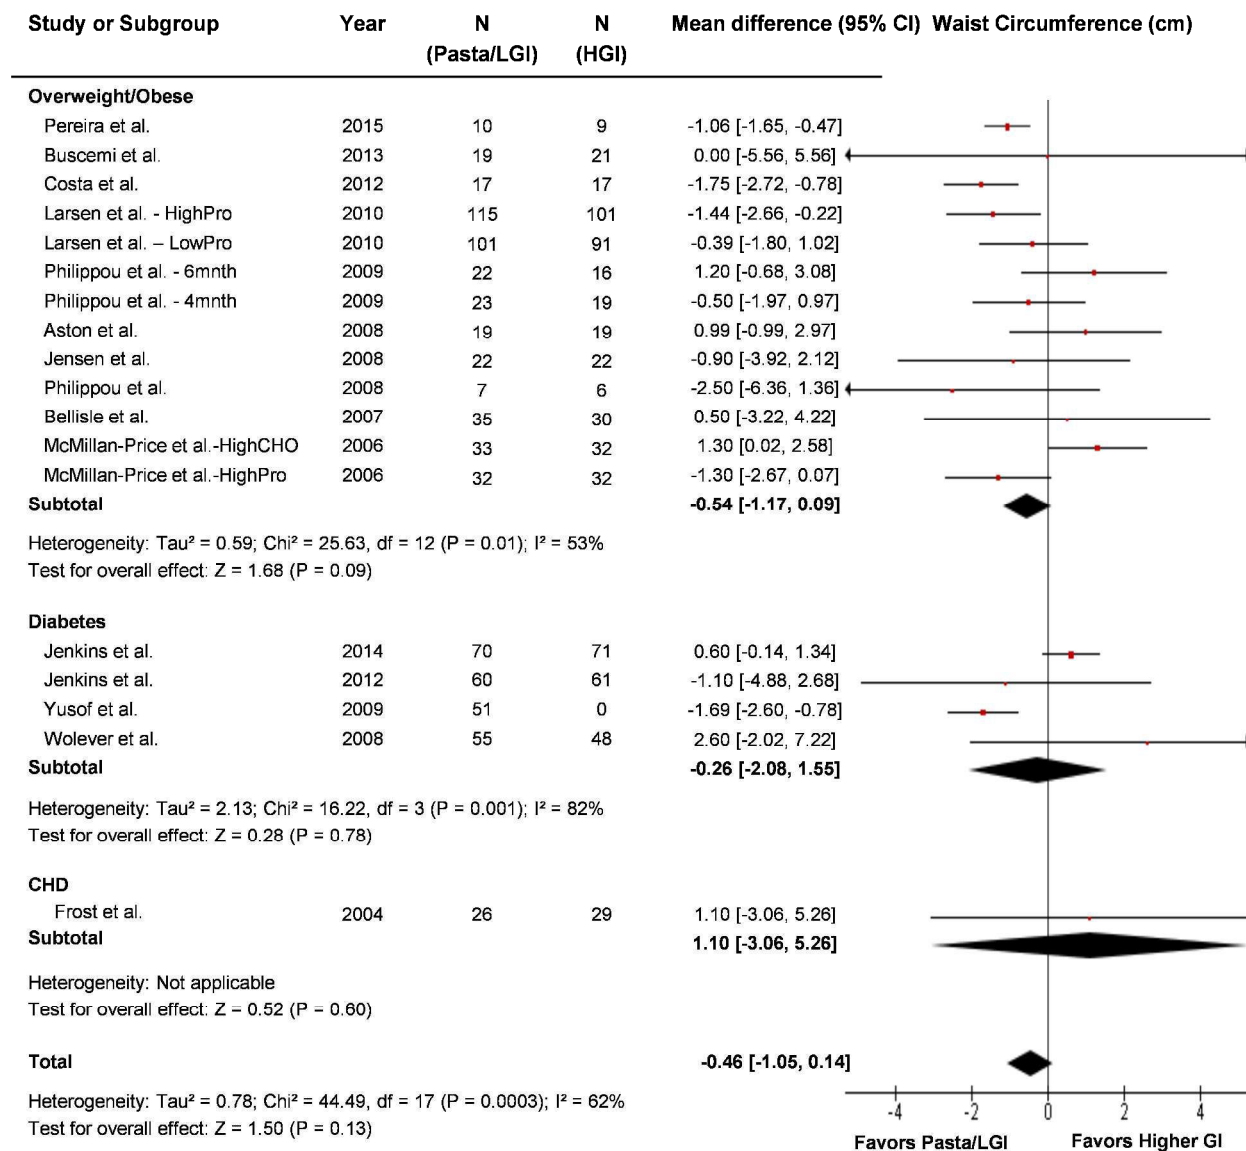

### Supplemental Figure S5: Forest plot of randomized controlled trials investigating the effects of pasta in the context of low-GI dietary patterns on waist circumference (cm) (n = 1380)

Data are expressed as mean differences represented by a square and 95% CIs by the line through the square. 95% CIs exceeding the plot's bounds are represented by an arrowhead. Pooled effect estimates are represented by diamonds and were estimated with the use of generic inverse variance random effects models. Between-study heterogeneity was detected with the use of the Cochran's Q statistic at a significance level of  $P < 0.10$  and quantified with the use of the  $I^2$  statistic where  $I^2 \geq 50\%$  is considered to be evidence of substantial heterogeneity and  $\geq 75\%$  considerable heterogeneity.

CHD, coronary heart disease; CHO, carbohydrate; CI, confidence interval; HGI, higher glycemic index diet; GI, glycemic index; LGI, low glycemic index diet; Pro, protein

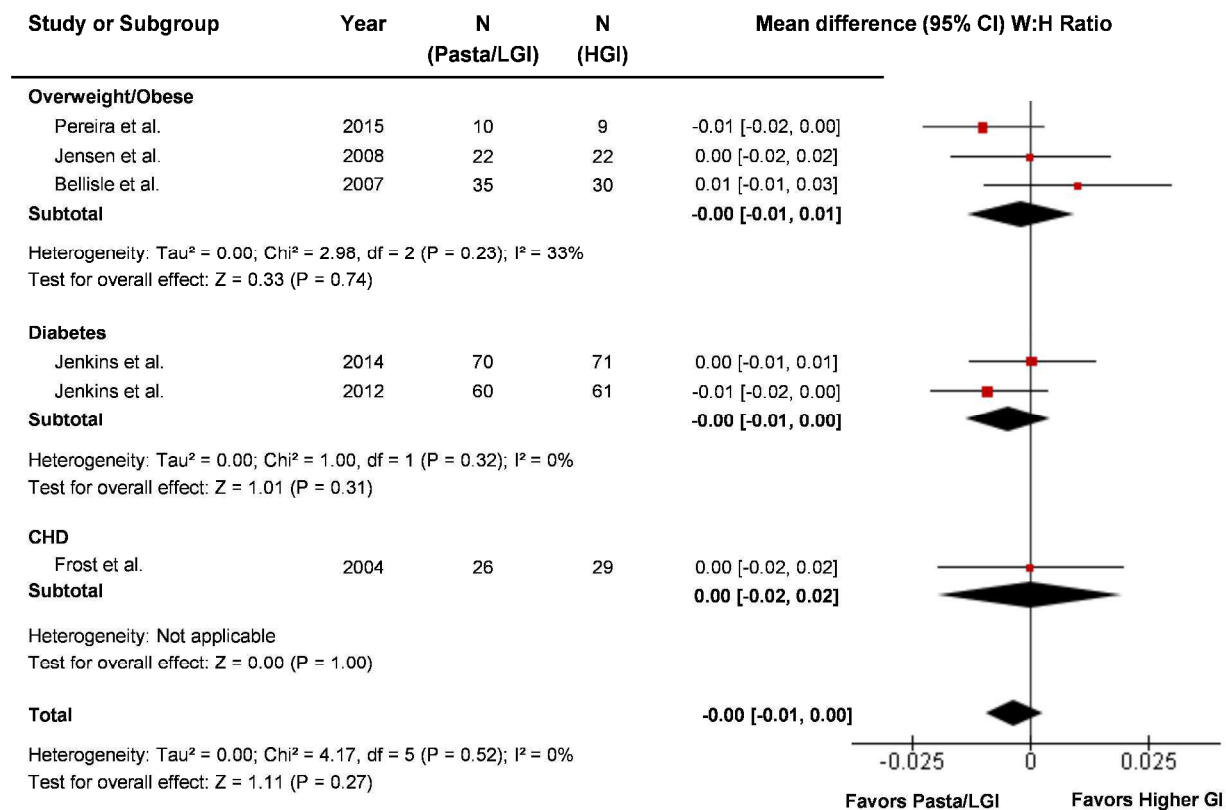

### Supplemental Figure S6: Forest plot of randomized controlled trials investigating the effects of pasta in the context of low-GI dietary patterns on waist-to-hip ratio (n = 445)

Data are expressed as mean differences represented by a square and 95% CIs by the line through the square. 95% CIs exceeding the plot's bounds are represented by an arrowhead. Pooled effect estimates are represented by diamonds and were estimated with the use of generic inverse variance random effects models. Between-study heterogeneity was detected with the use of the Cochran's Q statistic at a significance level of  $P < 0.10$  and quantified with the use of the  $I^2$  statistic where  $I^2 \geq 50\%$  is considered to be evidence of substantial heterogeneity and  $\geq 75\%$  considerable heterogeneity.

CHD, coronary heart disease; CI, confidence interval; HGI, higher glycemic index diet; GI, glycemic index; LGI, low glycemic index diet

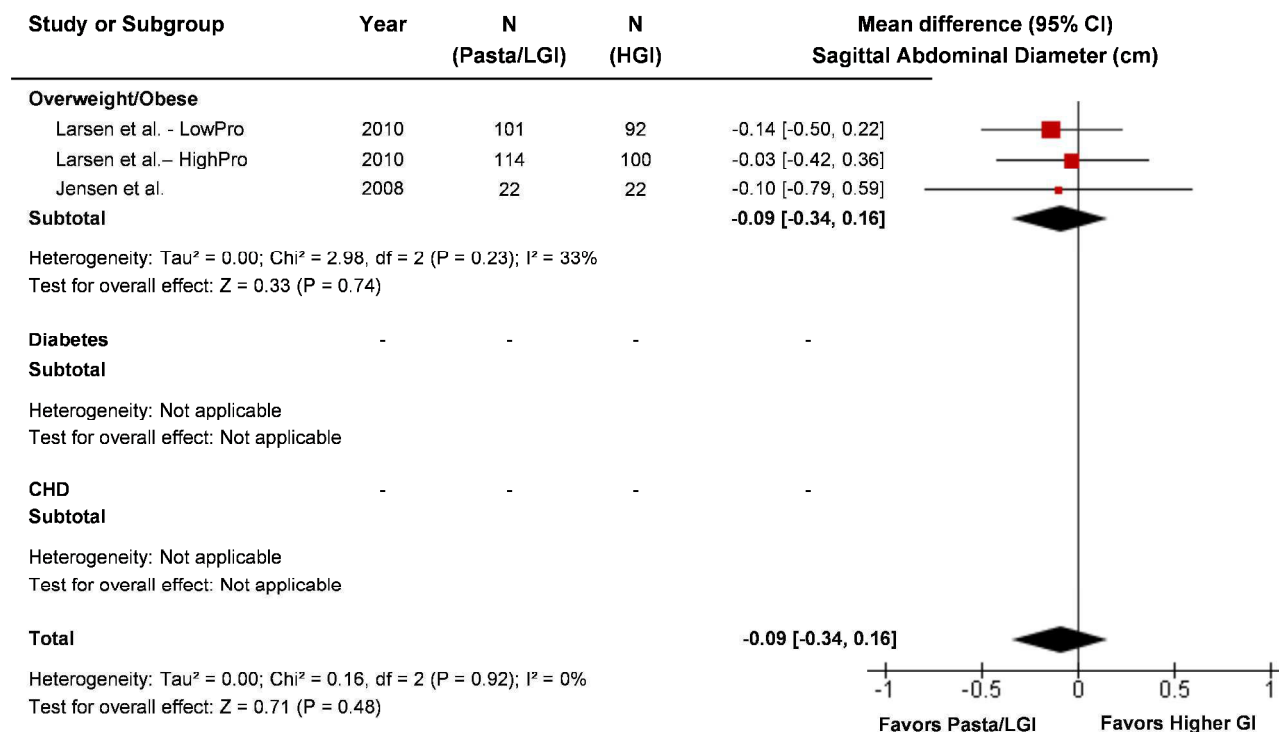

### Supplemental Figure S7: Forest plot of randomized controlled trials investigating the effects of pasta in the context of low-GI dietary patterns on sagittal abdominal diameter (cm) (n = 478)

Data are expressed as mean differences represented by a square and 95% CIs by the line through the square. 95% CIs exceeding the plot's bounds are represented by an arrowhead. Pooled effect estimates are represented by diamonds and were estimated with the use of generic inverse variance random effects models. Between-study heterogeneity was detected with the use of the Cochran's Q statistic at a significance level of  $P < 0.10$  and quantified with the use of the  $I^2$  statistic where  $I^2 \geq 50\%$  is considered to be evidence of substantial heterogeneity and  $\geq 75\%$  considerable heterogeneity.

CHD, coronary heart disease; CI, confidence interval; HGI, higher glycemic index diet; GI, glycemic index; LGI, low glycemic index diet; Pro, protein

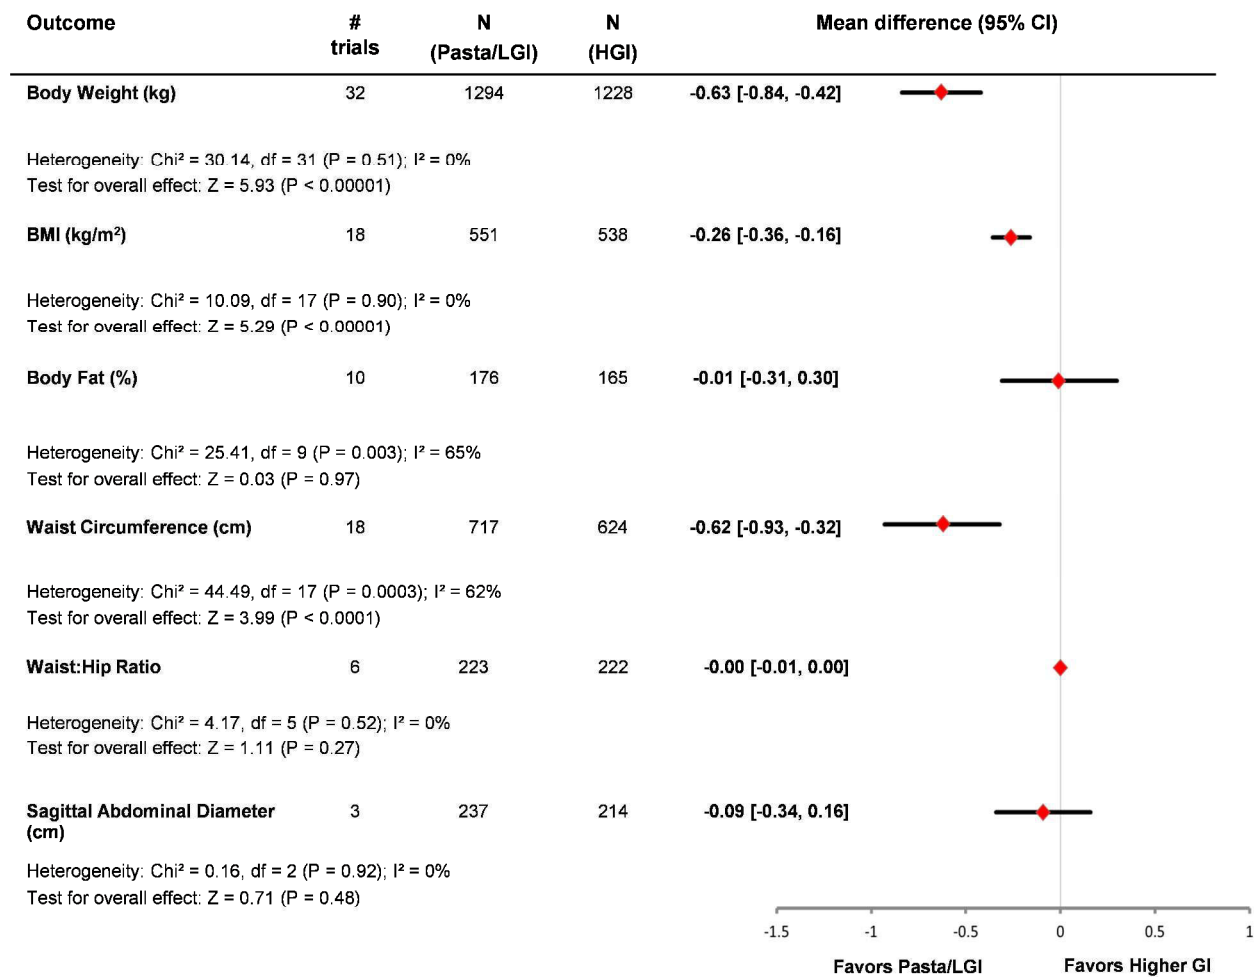

**Supplemental Figure S8: Forest plot of randomized controlled trials investigating the effects of pasta in the context of low-GI dietary patterns on body weight (kg) using fixed effects models (n = 2448)**

Data are expressed as mean differences represented by a square and 95% CIs by the line through the square. 95% CIs exceeding the plot’s bounds are represented by an arrowhead. Pooled effect estimates are represented by diamonds and were estimated with the use of generic inverse variance fixed effects models. Between-study heterogeneity was detected with the use of the Cochran’s Q statistic at a significance level of P<0.10 and quantified with the use of the I<sup>2</sup> statistic where I<sup>2</sup>≥50% is considered to be evidence of substantial heterogeneity and ≥75% considerable heterogeneity.

CHD, coronary heart disease; CHO, carbohydrate; CI, confidence interval; HGI, higher glycemic index diet; GI, glycemic index; LGI, low glycemic index diet; MUFA, monounsaturated fatty acids; Pro, protein.



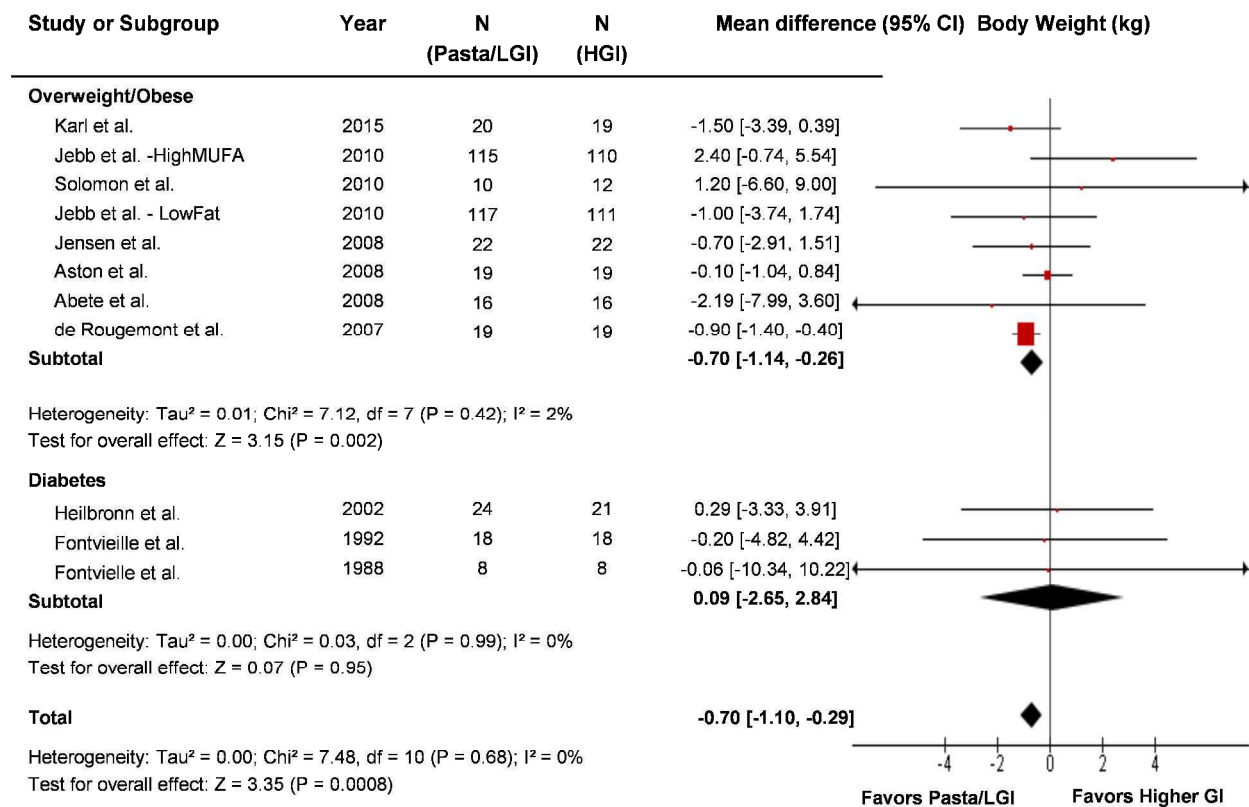

### Supplemental Figure S9: Forest plot of randomized controlled trials which contain data for approximating pasta intake which are investigating the effects of pasta in the context of low-GI dietary patterns on body weight (kg) (n = 740)

Data are expressed as mean differences represented by a square and 95% CIs by the line through the square. 95% CIs exceeding the plot's bounds are represented by an arrowhead. Pooled effect estimates are represented by diamonds and were estimated with the use of generic inverse variance random effects models. Between-study heterogeneity was detected with the use of the Cochran's Q statistic at a significance level of  $P < 0.10$  and quantified with the use of the  $I^2$  statistic where  $I^2 \geq 50\%$  is considered to be evidence of substantial heterogeneity and  $\geq 75\%$  considerable heterogeneity.

CI, confidence interval; HGI, higher glycemic index diet; GI, glycemic index; LGI, low glycemic index diet; MUFA, monounsaturated fatty acids

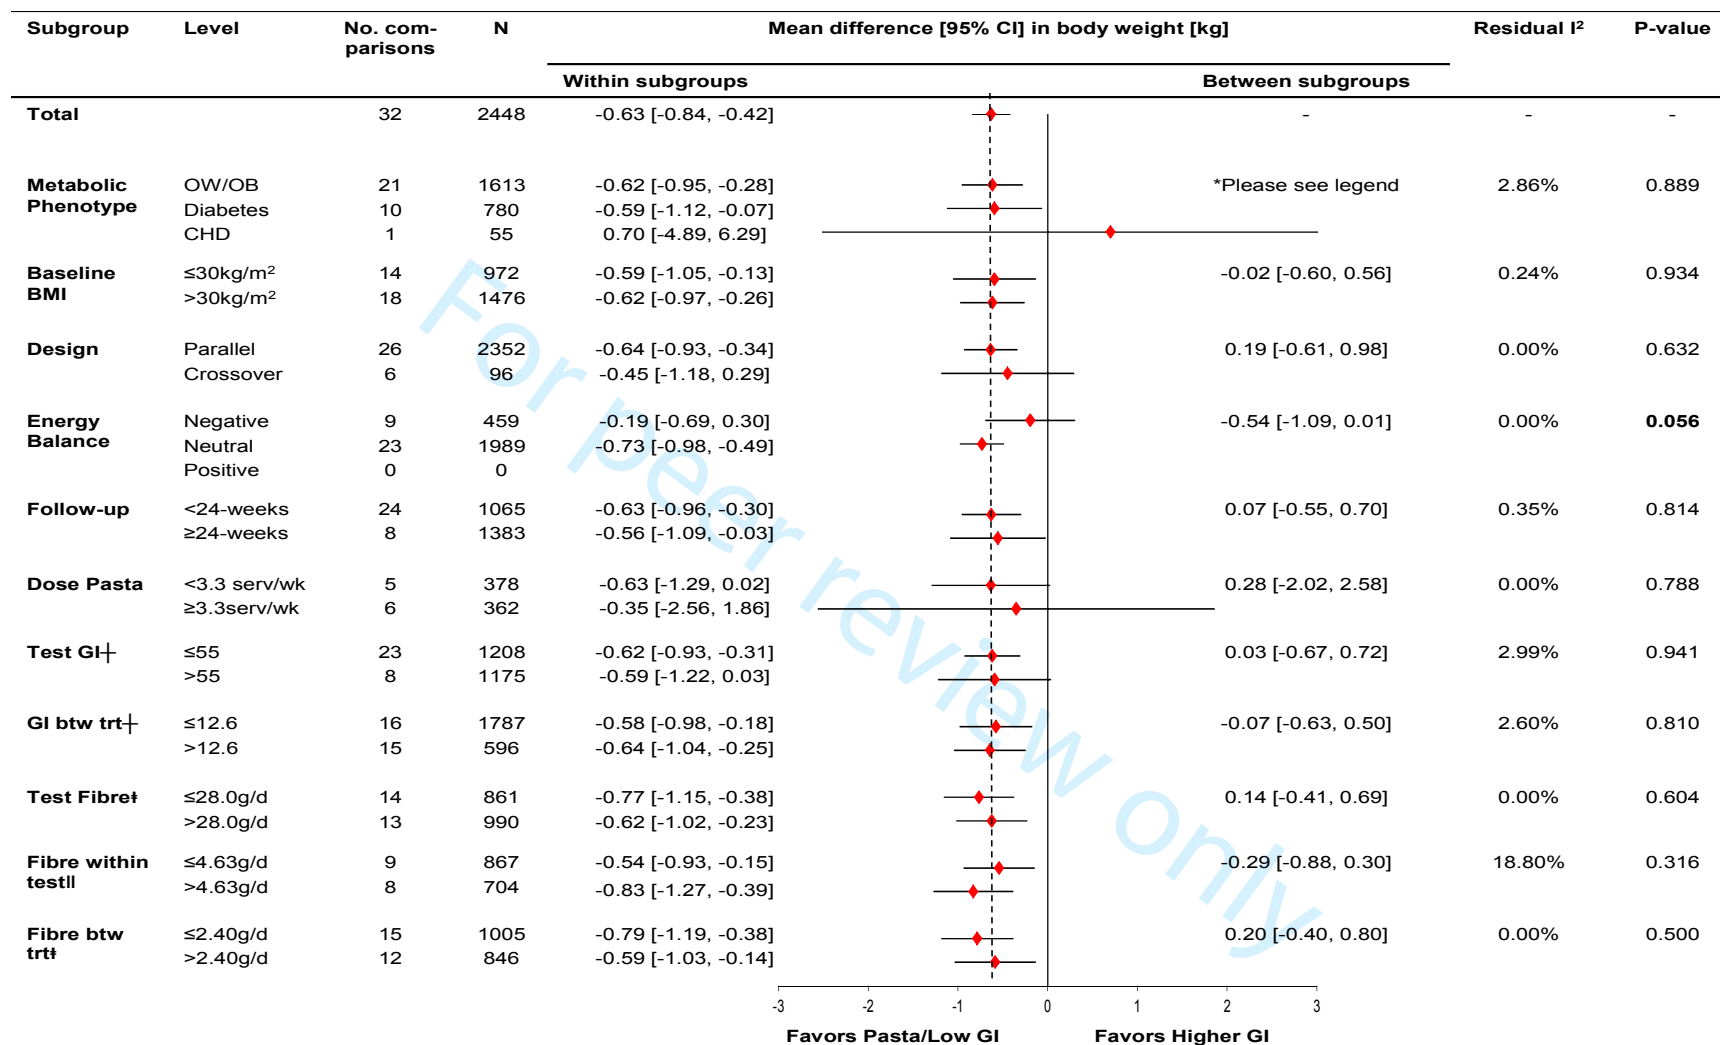

**Supplemental Figure S10: Subgroup analysis for mean differences (95% CIs) of the effects of pasta in the context of low-GI dietary patterns on body weight (kg) (n = 2448)**

1  
2  
3 The dashed line represents the pooled estimate for the overall primary analysis of pasta in the context of low-GI dietary patterns on  
4 body weight. Within subgroup mean differences are the pooled effect estimates represented by a diamond. 95% CIs are represented by  
5 the line through the square. The residual  $I^2$  was estimated with the use of the Cochran's Q statistic and indicates the between study  
6 heterogeneity unexplained by the variability in response because of the specific between studies factor.  $P < 0.05$  indicated that the  
7 effect size differed between levels of the subgroup. Within and between-treatment changes were categorically assessed based on the  
8 median intakes.  
9

10  
11 BMI, body mass index; btw, between; CHD, coronary heart disease; CI, confidence interval; GI, glycemic index (glucose scale); OB,  
12 obese; OW, overweight; serv, serving; trt, treatment; wk, week.  
13

14  
15 \*Pairwise between-subgroup mean differences (95% CIs) for Metabolic Phenotype were as follows: 0.02kg (-0.08, 0.65) (1 vs. 2) to  
16 1.32kg (-4.28, 6.91) (1 vs. 3) to -1.29kg (-6.91, 4.32) (2 vs. 3).

17 † data available on 31 studies

18 ‖ data available on 17 studies

19 ‡ data available on 27 studies  
20  
21  
22  
23  
24  
25  
26  
27  
28  
29  
30  
31  
32  
33  
34  
35  
36  
37  
38  
39  
40  
41  
42  
43  
44  
45  
46  
47

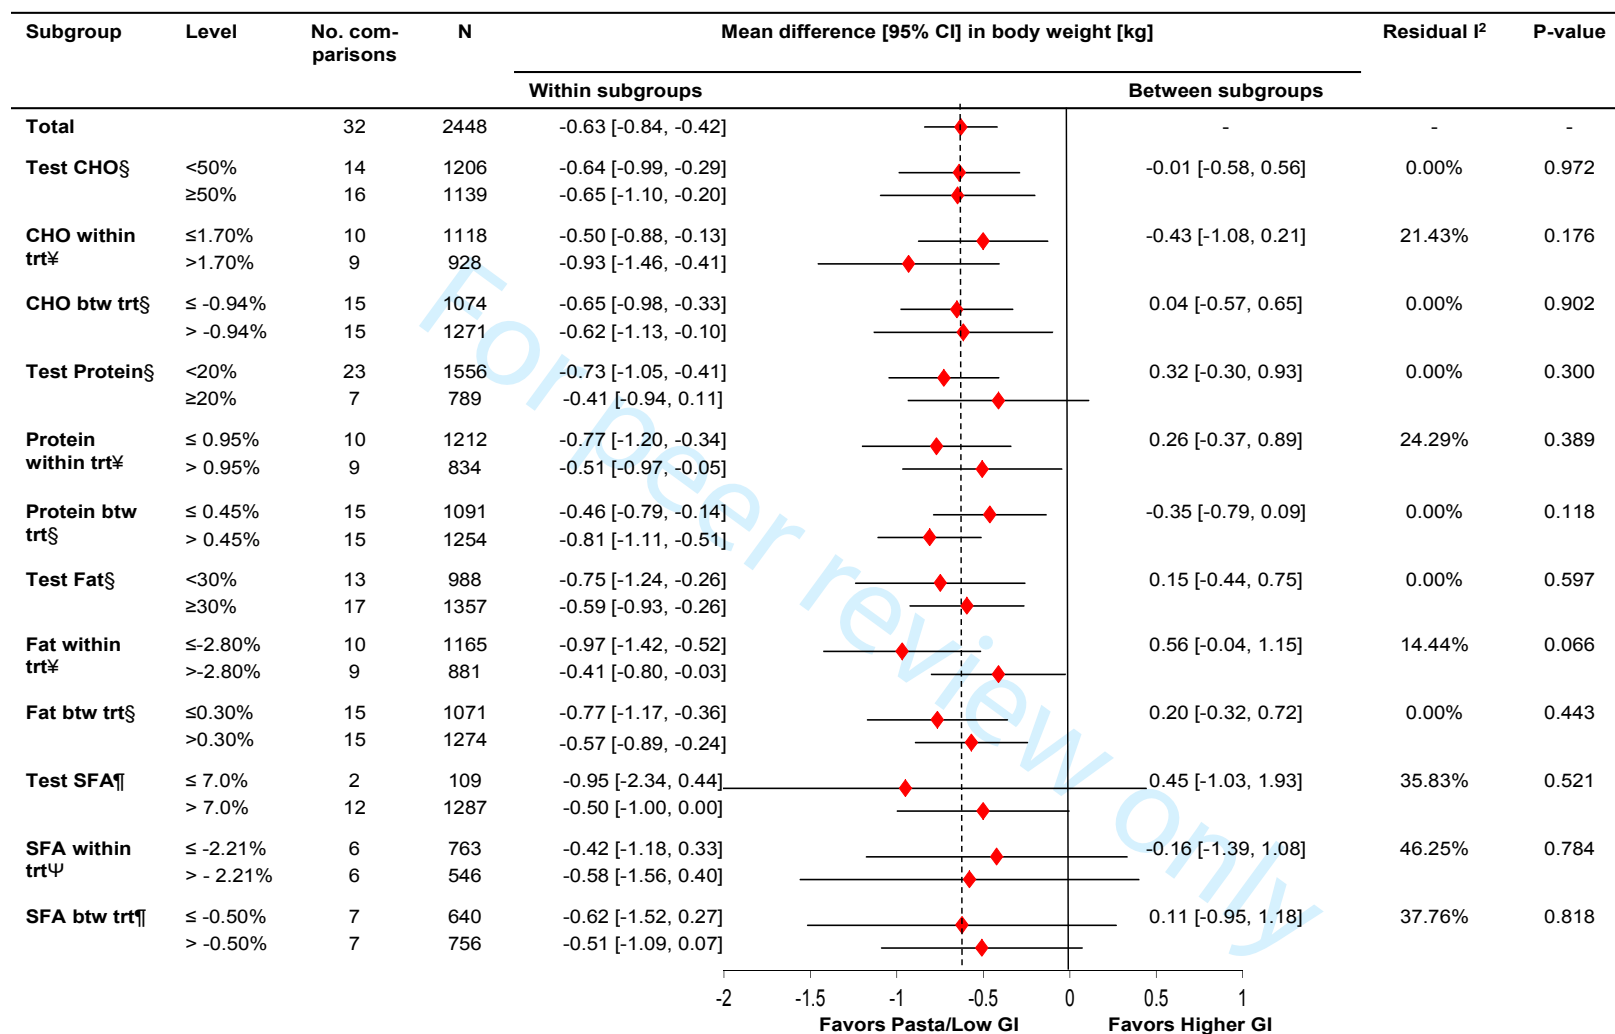

**Supplemental Figure S11: Subgroup analysis for mean differences (95% CIs) of the effects of pasta in the context of low-GI dietary patterns on body weight (kg) continued (n = 2448)**

1  
2  
3  
4  
5  
6  
7  
8  
9  
10  
11  
12  
13  
14  
15  
16  
17  
18  
19  
20  
21  
22  
23  
24  
25  
26  
27  
28  
29  
30  
31  
32  
33  
34  
35  
36  
37  
38  
39  
40  
41  
42  
43  
44  
45  
46  
47

The dashed line represents the pooled estimate for the overall primary analysis of pasta in the context of low-GI dietary patterns on body weight. Within subgroup mean differences are the pooled effect estimates represented by a diamond. 95% CIs are represented by the line through the square. The residual  $I^2$  was estimated with the use of the Cochran's Q statistic and indicates the between study heterogeneity unexplained by the variability in response because of the specific between studies factor.  $P < 0.05$  indicated that the effect size differed between levels of the subgroup. Within and between-treatment changes were categorically assessed based on the median intakes.

BMI, body mass index; btw, between; CI, confidence interval; GI, glycemic index (glucose scale); trt, treatment.  
§ data available on 30 studies  
¥ data available on 19 studies  
¶ data available on 14 studies  
Ψ data available on 12 studies

For peer review only

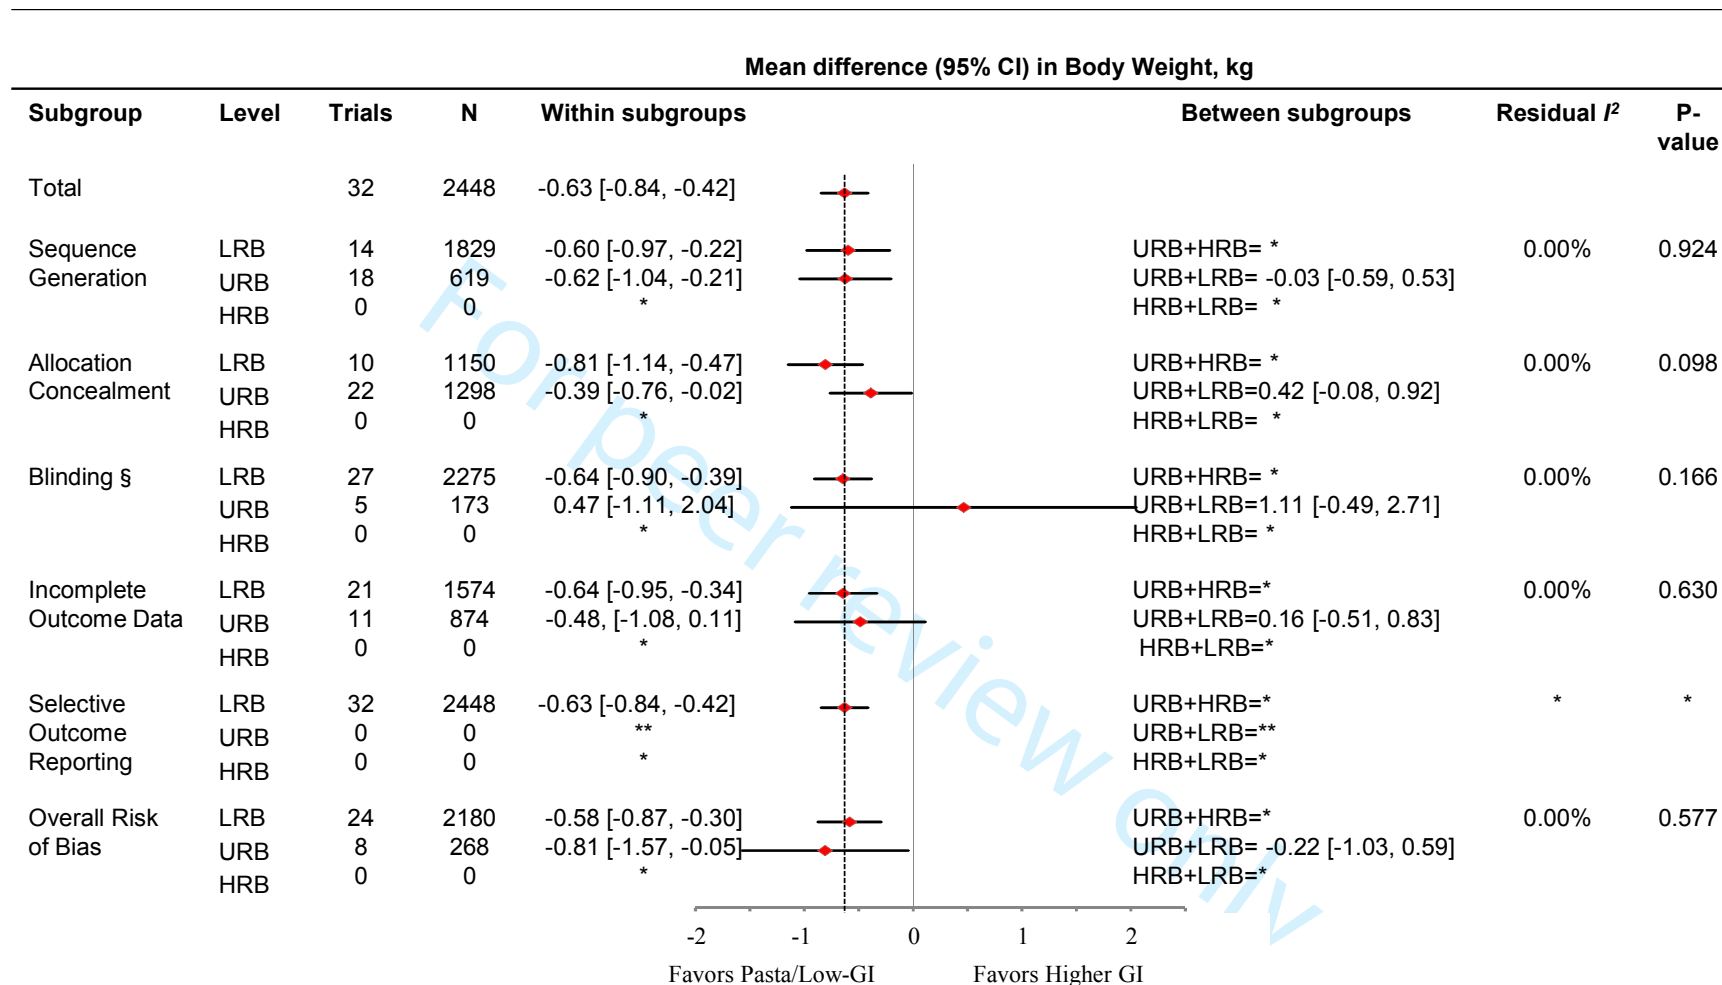

**Supplemental Figure S12: A priori subgroup analyses on risk of bias for mean differences (95% CIs) of the effect of pasta in the context of low-GI dietary patterns on body weight (kg) (n = 2448)**

1  
2  
3 The dashed line represents the pooled estimate for the overall primary analysis of pasta in the context of low-GI dietary patterns on  
4 body weight. Within subgroup mean differences are the pooled effect estimates represented by a diamond. 95% CIs are represented by  
5 the line through the square. The residual  $I^2$  was estimated with the use of the Cochran's Q statistic and indicates the between study  
6 heterogeneity unexplained by the variability in response because of the specific between studies factor.  $P < 0.05$  indicated that the  
7 effect size differed between levels of the subgroup.  
8  
9

10 LRB=Low Risk of Bias, URB= Unclear Risk of Bias, HRB=High Risk of Bias. \*Within and between subgroup analysis could not be  
11 performed against HRB since no values for HRB subgroup. \*\* no values for URB subgroup. § Blinding of Participants, Personnel,  
12 and Outcome Assessors.  
13  
14  
15  
16  
17  
18  
19  
20  
21  
22  
23  
24  
25  
26  
27  
28  
29  
30  
31  
32  
33  
34  
35  
36  
37  
38  
39  
40  
41  
42  
43  
44  
45  
46  
47

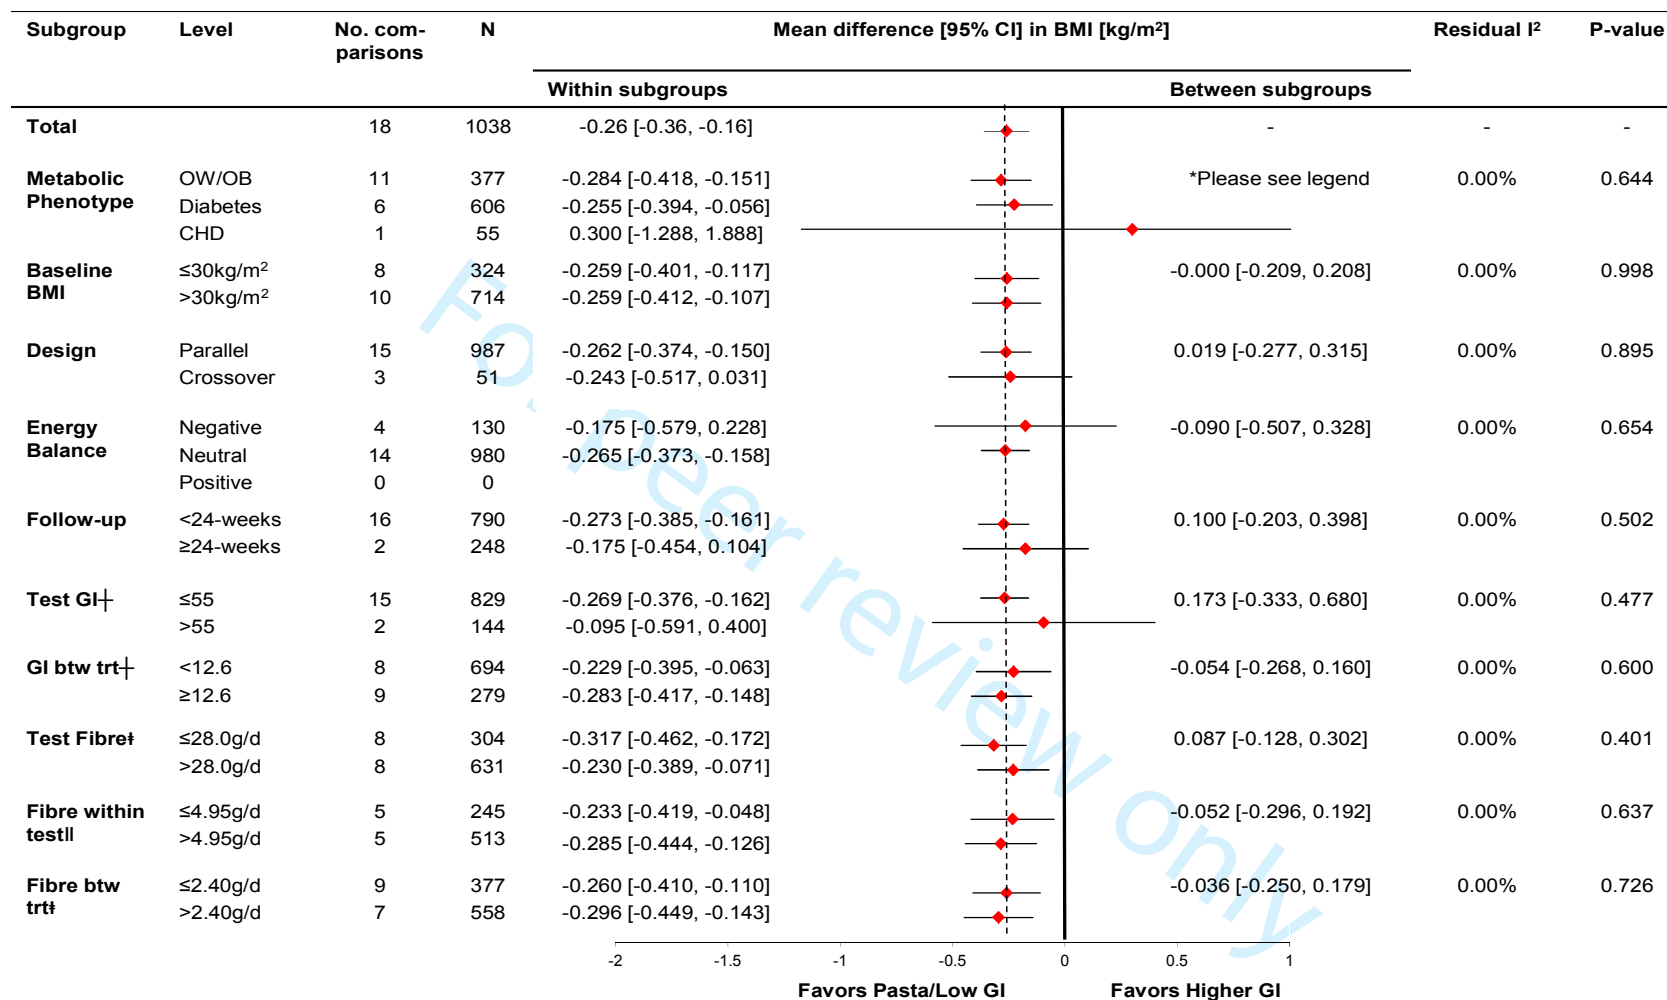

**Supplemental Figure S13: Subgroup analysis for mean differences (95% CIs) of the effects of pasta in the context of low-GI dietary patterns on body mass index, BMI (kg/m<sup>2</sup>) (n = 1038)**

The dashed line represents the pooled estimate for the overall primary analysis of pasta in the context of low-GI dietary patterns on BMI. Within subgroup mean differences are the pooled effect estimates represented by a diamond. 95% CIs are represented by the line through the square. The residual I<sup>2</sup> was estimated with the use of the Cochran’s Q statistic and indicates the between study



1  
2  
3 heterogeneity unexplained by the variability in response because of the specific between studies factor.  $P < 0.05$  indicated that the  
4 effect size differed between levels of the subgroup. Within and between-treatment changes were categorically assessed based on the  
5 median intakes. There were less than 10 trials available for categorical subgroup assessment for dose (n=3 trials), therefore analyses  
6 were not performed.  
7  
8

9 \*Pairwise between-subgroup mean differences (95% CIs) for Metabolic Phenotype were as follows:  $0.059\text{kg/m}^2$  (-0.156, 0.274) (1 vs.  
10 2) to  $0.584\text{kg/m}^2$  (-1.009, 2.178) (1 vs. 3) to  $-0.525\text{kg/m}^2$  (-2.122, 1.072) (2 vs. 3).  
11

12 † data available on 17 studies

13 ‡ data available on 16 studies

14 § data available on 10 studies  
15

16 BMI, body mass index; btw, between; CI, confidence interval; GI, glycemic index (glucose scale); OB, obese; OW, overweight; trt,  
17 treatment.  
18  
19  
20  
21  
22  
23  
24  
25  
26  
27  
28  
29  
30  
31  
32  
33  
34  
35  
36  
37  
38  
39  
40  
41  
42  
43  
44  
45  
46  
47

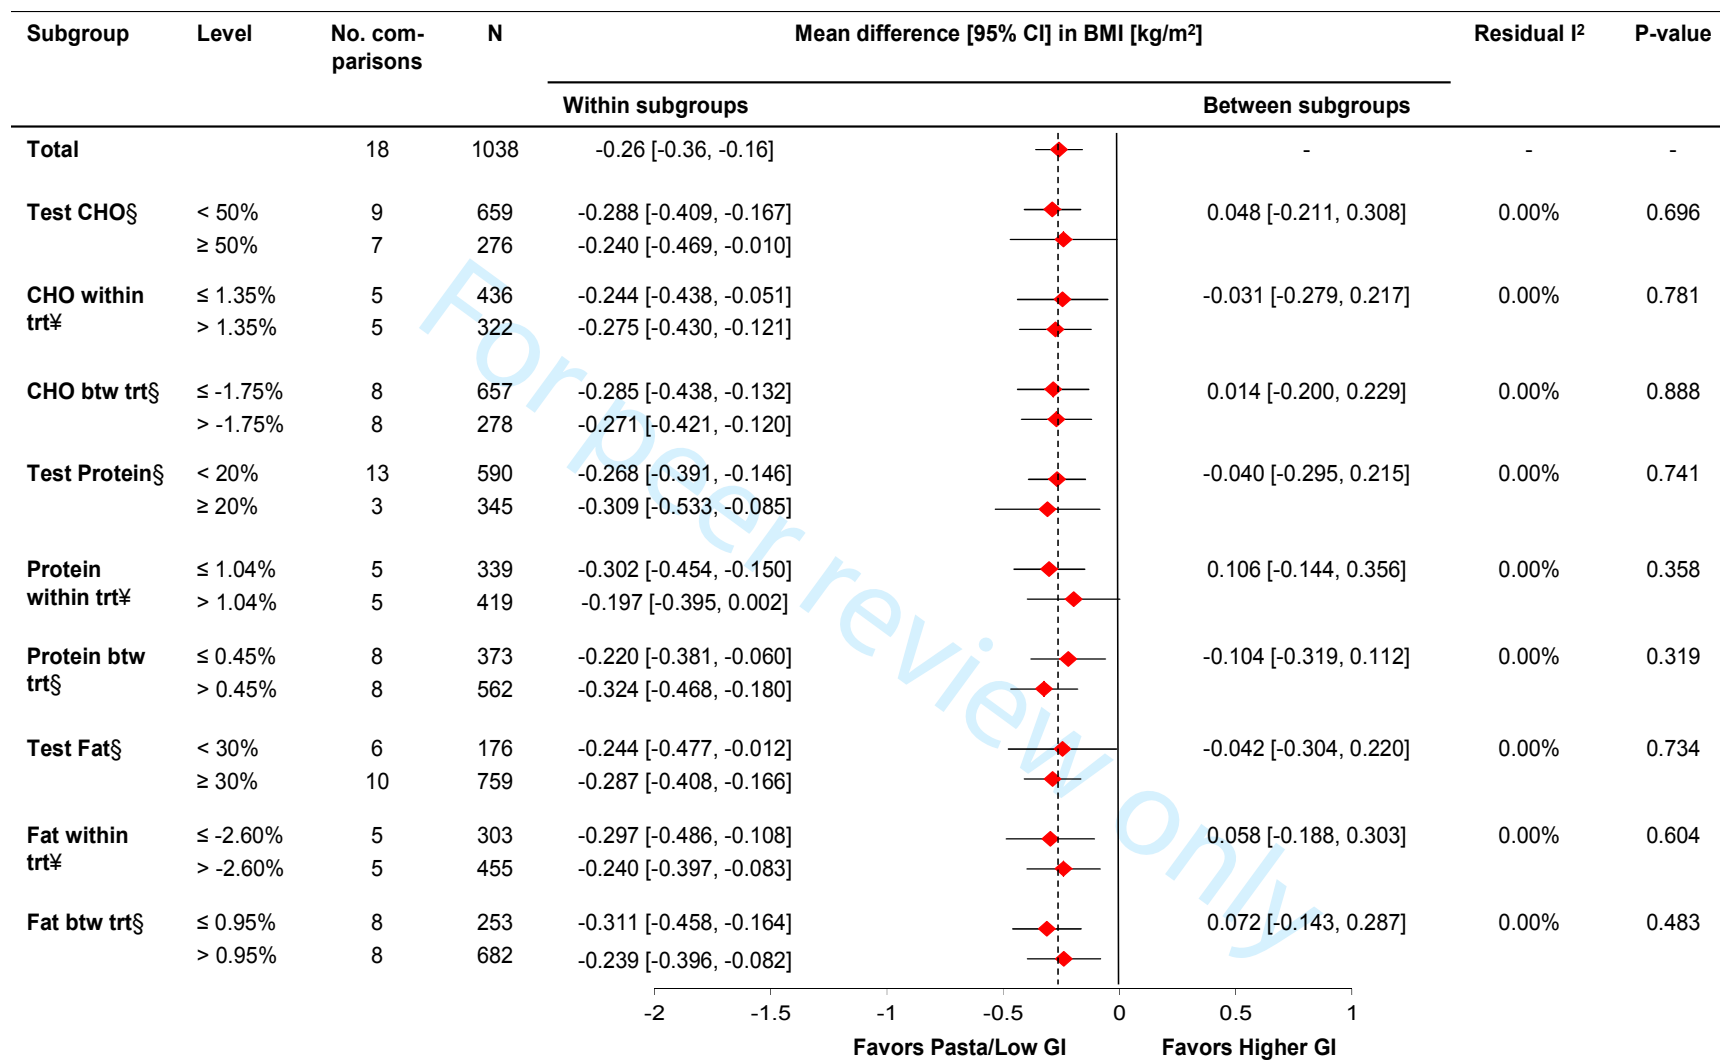

**Supplemental Figure S14: Subgroup analysis for mean differences (95% CIs) of the effects of pasta in the context of low-GI dietary patterns on body mass index, BMI (kg/m<sup>2</sup>) continued (n = 1038)**

1  
2  
3 The dashed line represents the pooled estimate for the overall primary analysis of pasta in the context of low-GI dietary patterns on  
4 BMI. Within subgroup mean differences are the pooled effect estimates represented by a diamond. 95% CIs are represented by the line  
5 through the square. The residual  $I^2$  was estimated with the use of the Cochran's Q statistic and indicates the between study  
6 heterogeneity unexplained by the variability in response because of the specific between studies factor.  $P < 0.05$  indicated that the  
7 effect size differed between levels of the subgroup. Within and between-treatment changes were categorically assessed based on the  
8 median intakes. There were less than 10 trials available for categorical subgroup assessment for test saturated fat (n=7 trials), saturated  
9 fat within treatment (n=6 trials) and saturated fat between treatments (n=7 trials), therefore analyses were not performed.

10  
11 § data available on 16 studies

12 ¥ data available on 10 studies

13  
14  
15 BMI, body mass index; btw, between; CHO, carbohydrate; CI = confidence interval; GI, glycemic index (glucose scale); trt, treatment.

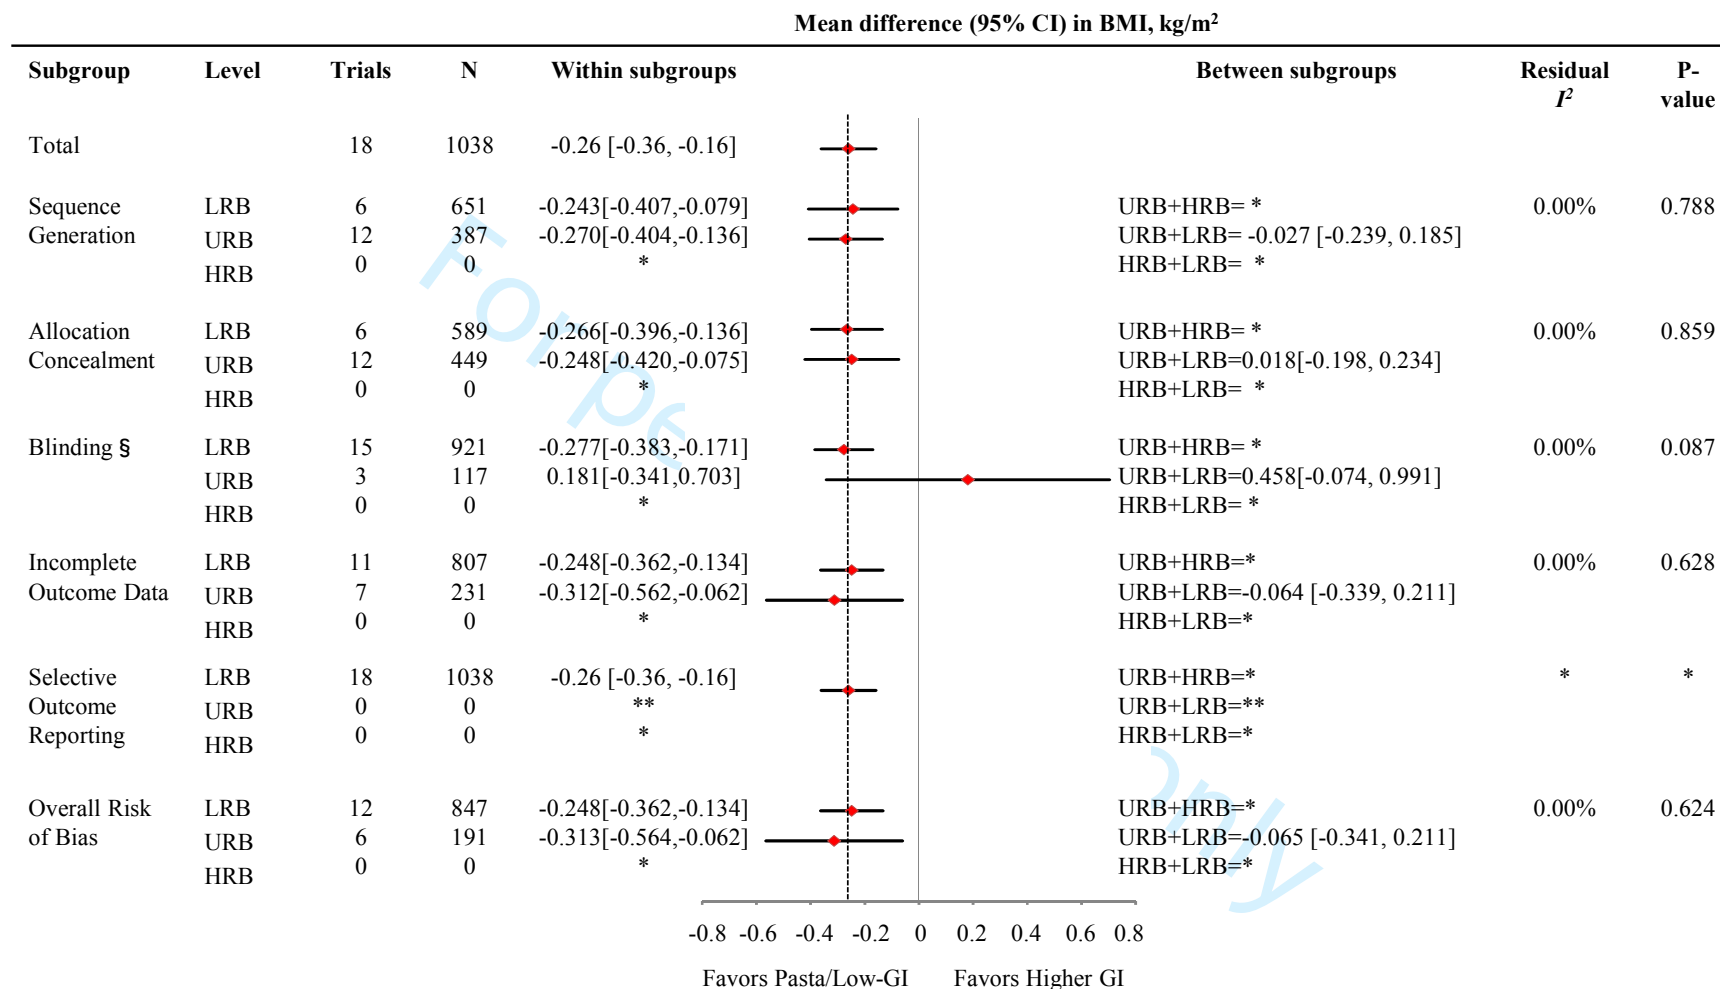

**Supplemental Figure S15: A priori subgroup analyses on risk of bias for mean differences (95% CIs) of the effect of pasta in the context of low-GI dietary patterns on body mass index, BMI (kg/m<sup>2</sup>) (n = 1038)**

1  
2  
3 The dashed line represents the pooled estimate for the overall primary analysis of pasta in the context of low-GI dietary patterns on  
4 BMI. Within subgroup mean differences are the pooled effect estimates represented by a diamond. 95% CIs are represented by the line  
5 through the square. The residual  $I^2$  was estimated with the use of the Cochran's Q statistic and indicates the between study  
6 heterogeneity unexplained by the variability in response because of the specific between studies factor.  $P < 0.05$  indicated that the  
7 effect size differed between levels of the subgroup.  
8  
9

10 \*Within and between subgroup analyses could not be performed against HRB since no values for HRB subgroup.

11 \*\* no values for URB subgroup.

12 § Blinding of Participants, Personnel, and Outcome Assessors.  
13  
14

15 BMI, body mass index; CI, confidence interval; HRB, High Risk of Bias; GI, glycemic index; LRB, Low Risk of Bias; URB, Unclear  
16 Risk of Bias.  
17  
18  
19  
20  
21  
22  
23  
24  
25  
26  
27  
28  
29  
30  
31  
32  
33  
34  
35  
36  
37  
38  
39  
40  
41  
42  
43  
44  
45  
46  
47

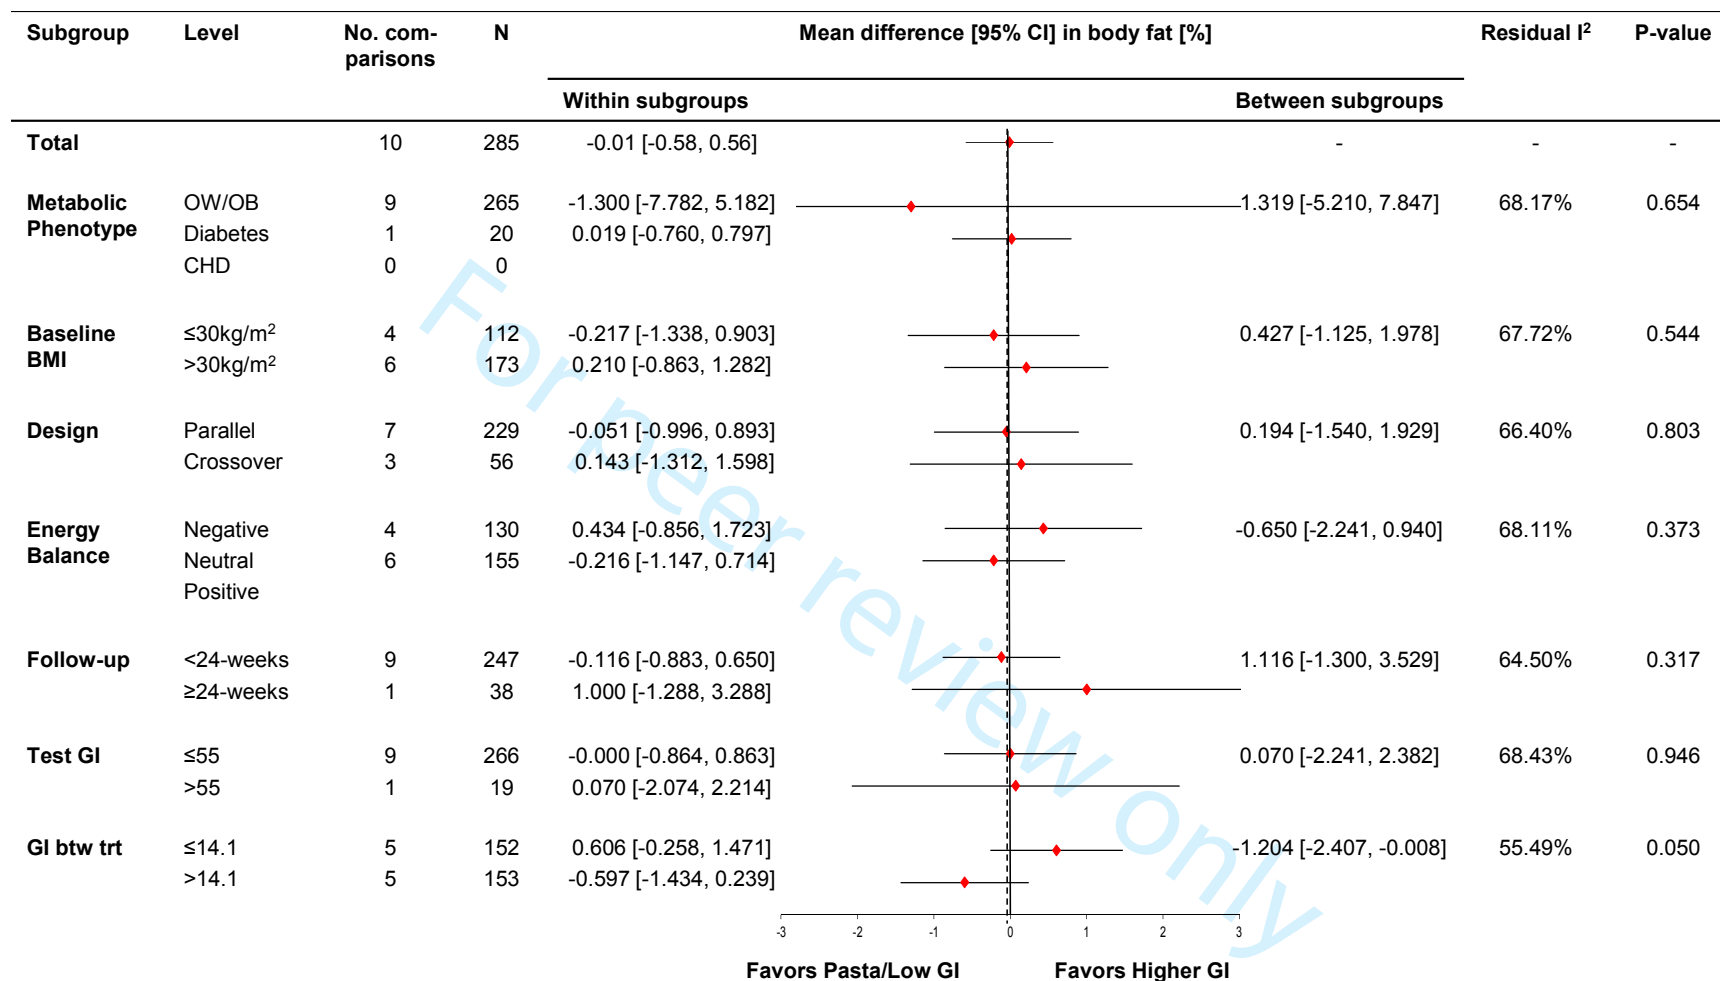

**Supplemental Figure S16: Subgroup analysis for mean differences (95% CIs) of the effects of pasta in the context of low-GI dietary patterns on body fat (%) (n = 285)**

1  
2  
3 The dashed line represents the pooled estimate for the overall primary analysis of pasta in the context of low-GI dietary patterns on  
4 body fat. Within subgroup mean differences are the pooled effect estimates represented by a diamond. 95% CIs are represented by the  
5 line through the square. The residual  $I^2$  was estimated with the use of the Cochran's Q statistic and indicates the between study  
6 heterogeneity unexplained by the variability in response because of the specific between studies factor.  $P < 0.05$  indicated that the  
7 effect size differed between levels of the subgroup. Within and between-treatment changes were categorically assessed based on the  
8 median intakes. There were less than 10 trials available for categorical subgroup assessment for dose (n=3), test carbohydrate, protein  
9 and fat (n=9), carbohydrate, protein and fat within treatment (n=4), carbohydrate, protein and fat between treatment (n=9), test fibre  
10 (n=8), fibre within treatment (n=4), fibre between treatment (n=8), test saturated fat (n=3 trials), saturated fat within treatment (n=2  
11 trials) and saturated fat between treatments (n=3 trials), therefore analyses were not performed.  
12  
13  
14  
15

16 BMI, body mass index; btw, between; CHO, carbohydrate; CI = confidence interval; GI, glycemic index (glucose scale); OB, obese;  
17 OW, overweight; trt, treatment.  
18  
19  
20  
21  
22  
23  
24  
25  
26  
27  
28  
29  
30  
31  
32  
33  
34  
35  
36  
37  
38  
39  
40  
41  
42  
43  
44  
45  
46  
47

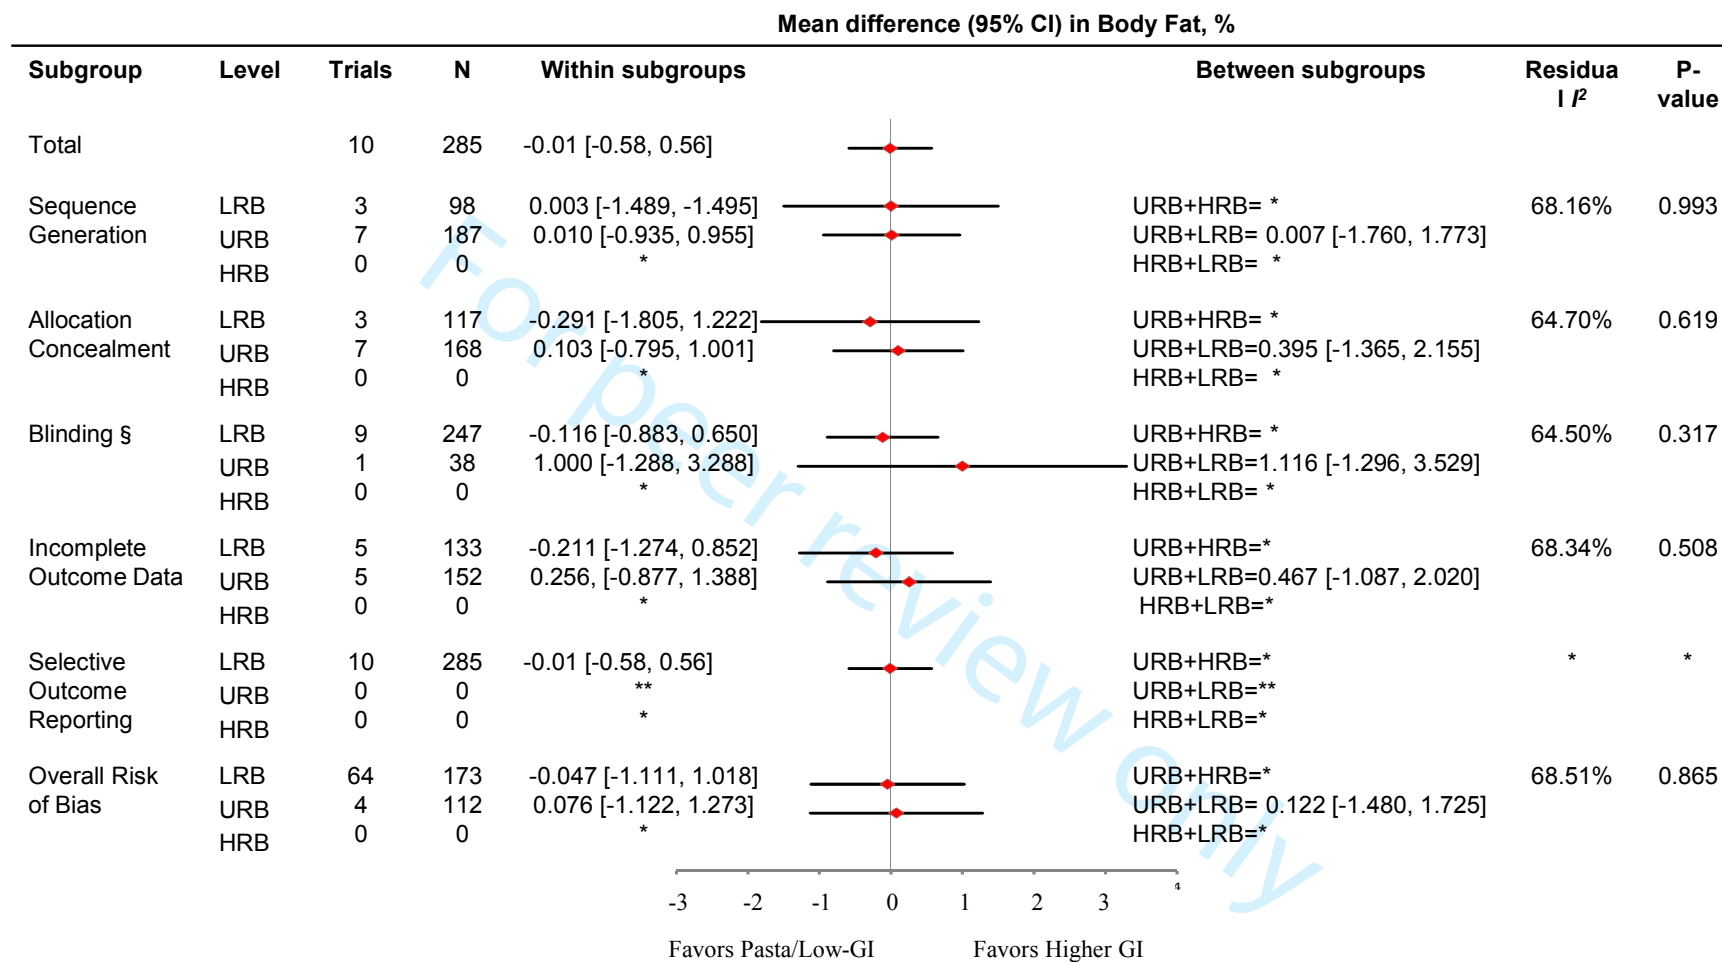

**Supplemental Figure S17: A priori subgroup analyses on risk of bias for mean differences (95% CIs) of the effect of pasta in the context of low-GI dietary patterns on body fat (%) (n = 285)**



1  
2  
3 The dashed line represents the pooled estimate for the overall primary analysis of pasta in the context of low-GI dietary patterns on  
4 body fat. Within subgroup mean differences are the pooled effect estimates represented by a diamond. 95% CIs are represented by the  
5 line through the square. The residual  $I^2$  was estimated with the use of the Cochran's Q statistic and indicates the between study  
6 heterogeneity unexplained by the variability in response because of the specific between studies factor.  $P < 0.05$  indicated that the  
7 effect size differed between levels of the subgroup.  
8  
9

10 \*Within and between subgroup analyses could not be performed against HRB since no values for HRB subgroup.

11 \*\* no values for URB subgroup.

12 § Blinding of Participants, Personnel, and Outcome Assessors.

13  
14  
15 CI, confidence interval; HRB, High Risk of Bias; GI, glycemic index; LRB, Low Risk of Bias; URB, Unclear Risk of Bias  
16  
17  
18  
19  
20  
21  
22  
23  
24  
25  
26  
27  
28  
29  
30  
31  
32  
33  
34  
35  
36  
37  
38  
39  
40  
41  
42  
43  
44  
45  
46  
47

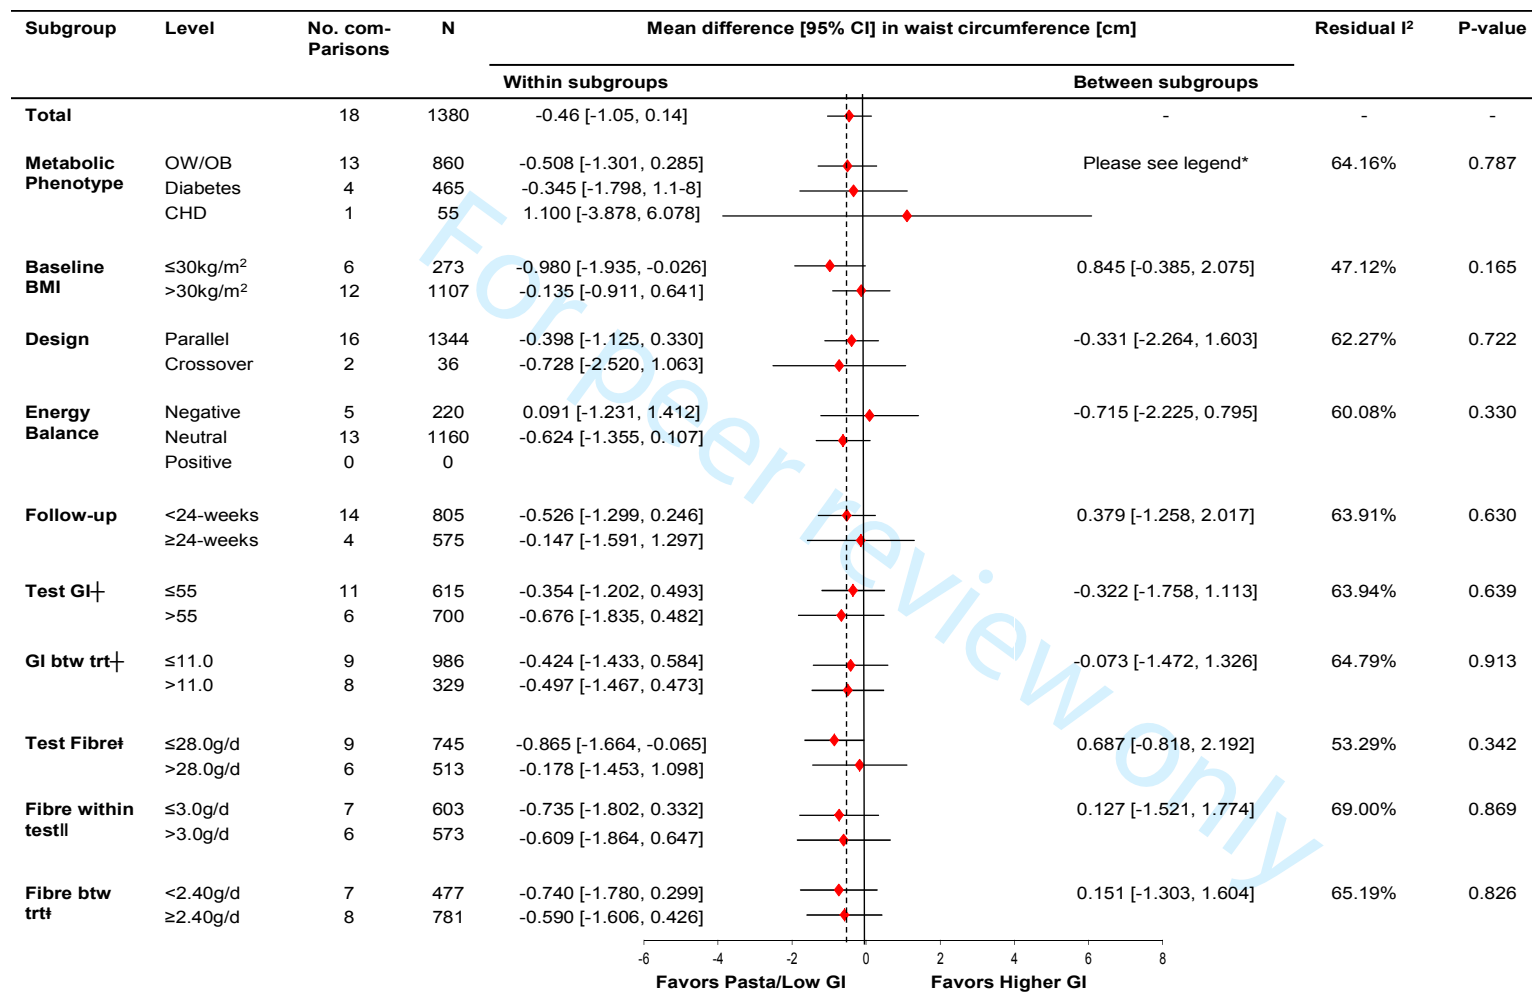

**Supplemental Figure S18: Subgroup analysis for mean differences (95% CIs) of the effects of pasta in the context of low-GI dietary patterns on waist circumference (cm) (n = 1380)**

1  
2  
3 The dashed line represents the pooled estimate for the overall primary analysis of pasta in the context of low-GI dietary patterns on  
4 waist circumference. Within subgroup mean differences are the pooled effect estimates represented by a diamond. 95% CIs are  
5 represented by the line through the square. The residual  $I^2$  was estimated with the use of the Cochran's Q statistic and indicates the  
6 between study heterogeneity unexplained by the variability in response because of the specific between studies factor.  $P < 0.05$   
7 indicated that the effect size differed between levels of the subgroup. Within and between-treatment changes were categorically  
8 assessed based on the median intakes. There were less than 10 trials available for categorical subgroup assessment for dose (n=2  
9 trials), therefore analyses were not performed.  
10  
11

12 \*Pairwise between-subgroup mean differences (95% CIs) for Metabolic Phenotype were as follows: 0.163cm (-1.492, 1.818) (1 vs. 2)  
13 to 1.608cm (-3.432, 6.648) (1 vs. 3) to -1.445cm (-6.630, 3.740) (2 vs. 3).

14 † data available on 17 studies

15 ‡ data available on 15 studies  
16  
17

18 BMI, body mass index; btw, between; CI = confidence interval; GI, glycemic index (glucose scale); OB, obese; OW, overweight; trt,  
19 treatment.  
20  
21  
22  
23  
24  
25  
26  
27  
28  
29  
30  
31  
32  
33  
34  
35  
36  
37  
38  
39  
40  
41  
42  
43  
44  
45  
46  
47

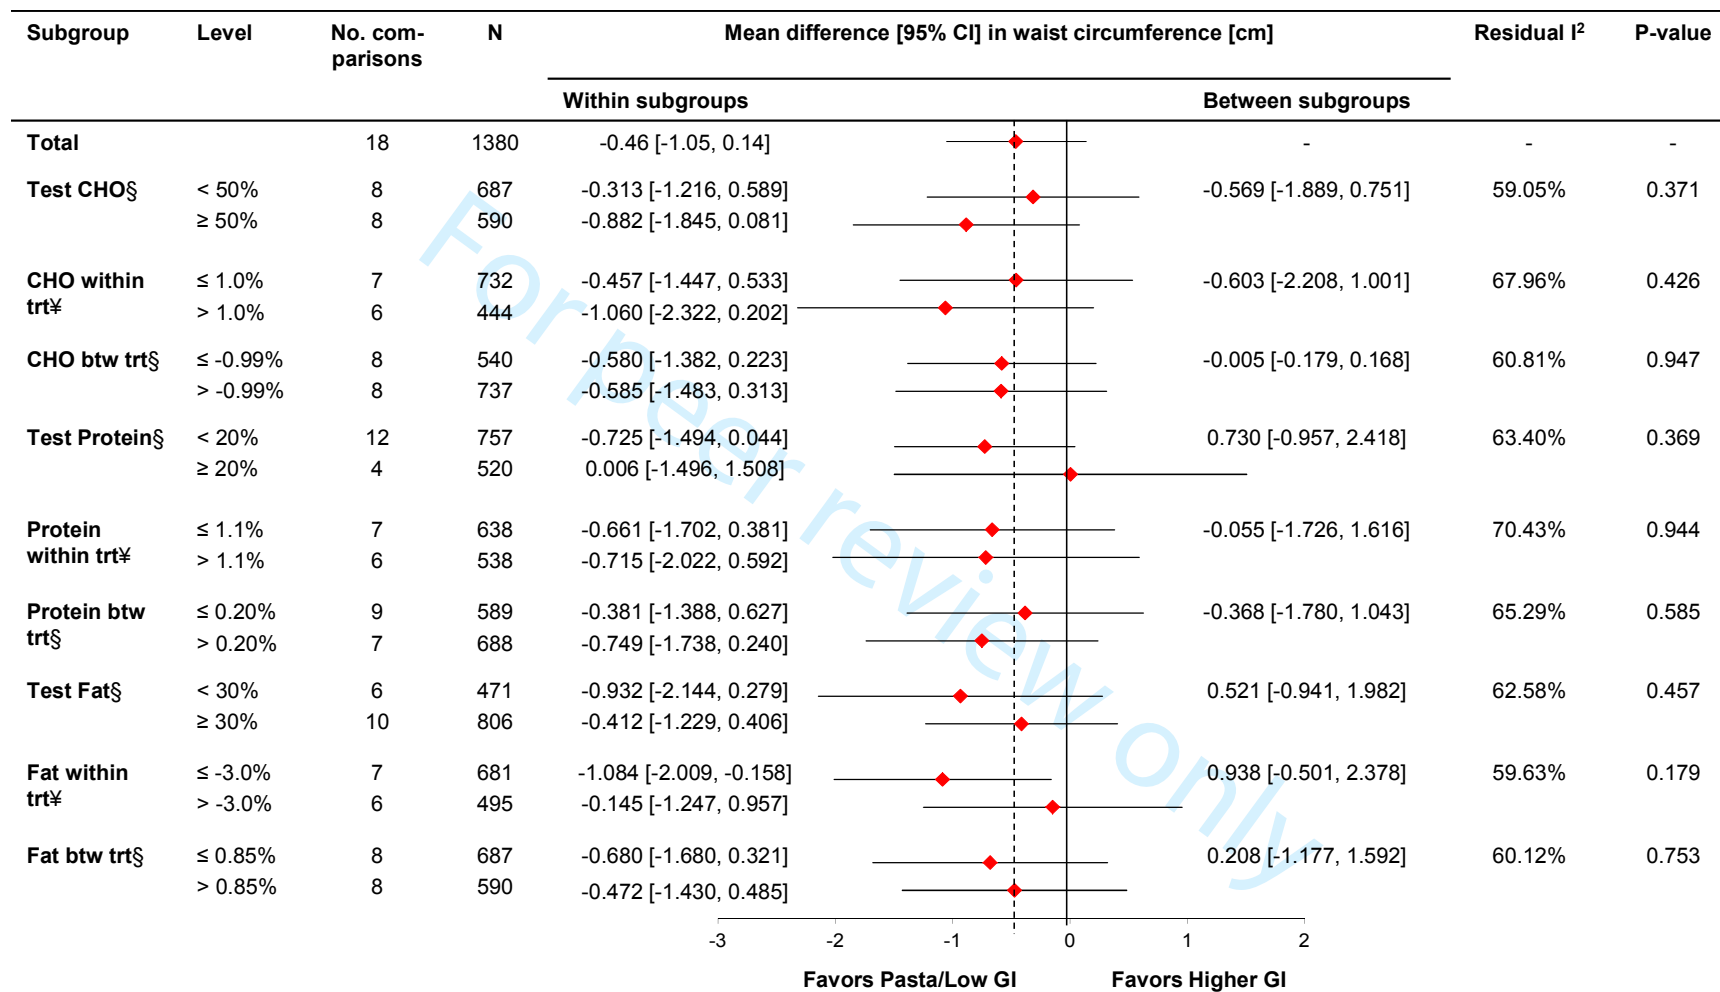

**Supplemental Figure S19: Subgroup analysis for mean differences (95% CIs) of the effects of pasta in the context of low-GI dietary patterns on waist circumference (cm) continued (n = 1380)**

1  
2  
3 The dashed line represents the pooled estimate for the overall primary analysis of pasta in the context of low-GI dietary patterns on  
4 waist circumference. Within subgroup mean differences are the pooled effect estimates represented by a diamond. 95% CIs are  
5 represented by the line through the square. The residual  $I^2$  was estimated with the use of the Cochran's Q statistic and indicates the  
6 between study heterogeneity unexplained by the variability in response because of the specific between studies factor.  $P < 0.05$   
7 indicated that the effect size differed between levels of the subgroup. Within and between-treatment changes were categorically  
8 assessed based on the median intakes. There were less than 10 trials available for categorical subgroup assessment for test saturated fat  
9 (n=8 trials), saturated fat within treatment (n=7 trials) and saturated fat between treatments (n=8 trials), therefore analyses were not  
10 performed.  
11  
12

13 § data available on 16 studies

14 ¥ data available on 13 studies

15  
16  
17 BMI, body mass index; btw, between; CHO, carbohydrate; CI = confidence interval; GI, glycemic index (glucose scale); trt, treatment.  
18  
19  
20  
21  
22  
23  
24  
25  
26  
27  
28  
29  
30  
31  
32  
33  
34  
35  
36  
37  
38  
39  
40  
41  
42  
43  
44  
45  
46  
47

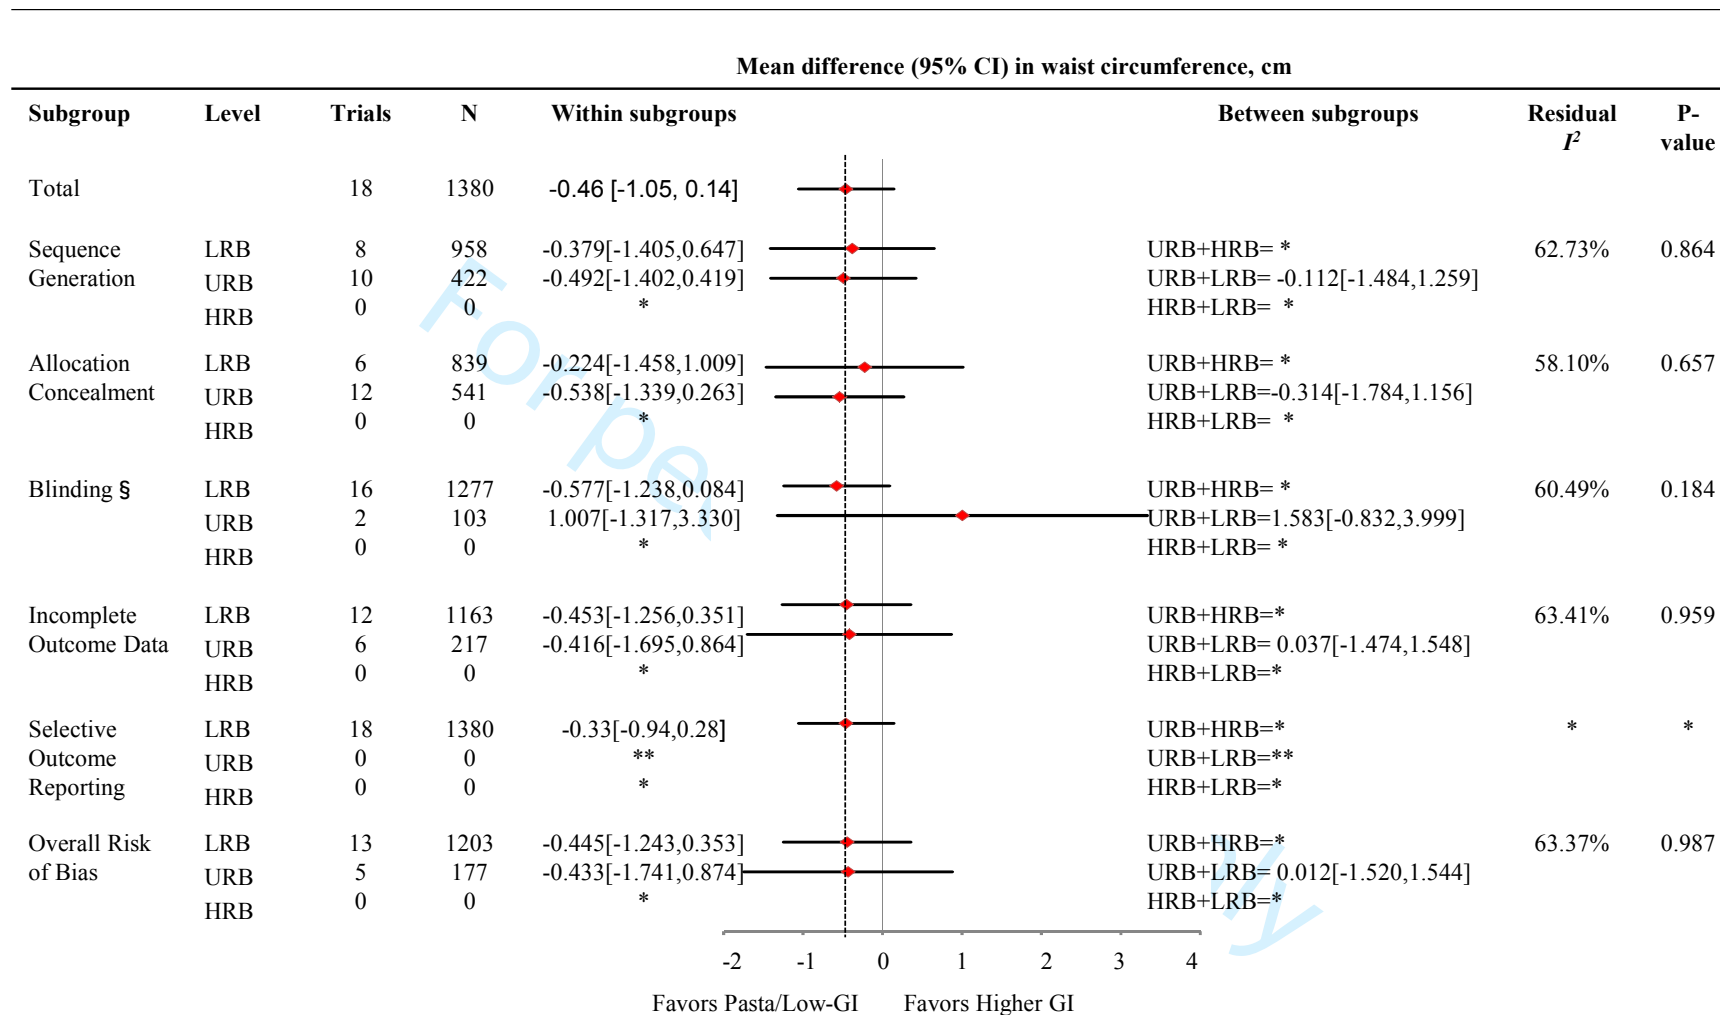

**Supplemental Figure S20: A priori subgroup analyses on risk of bias for mean differences (95% CIs) of the effect of pasta in the context of low-GI dietary patterns on waist circumference (cm) (n = 1380)**

1  
2  
3 The dashed line represents the pooled estimate for the overall primary analysis of pasta in the context of low-GI dietary patterns on  
4 waist circumference. Within subgroup mean differences are the pooled effect estimates represented by a diamond. 95% CIs are  
5 represented by the line through the square. The residual  $I^2$  was estimated with the use of the Cochran's Q statistic and indicates the  
6 between study heterogeneity unexplained by the variability in response because of the specific between studies factor.  $P < 0.05$   
7 indicated that the effect size differed between levels of the subgroup.  
8  
9

10 \*Within and between subgroup analyses could not be performed against HRB since no values for HRB subgroup.

11 \*\* no values for URB subgroup.

12 § Blinding of Participants, Personnel, and Outcome Assessors.  
13  
14

15 CI, confidence interval; HRB, High Risk of Bias; GI, glycemic index; LRB, Low Risk of Bias; URB, Unclear Risk of Bias  
16  
17  
18  
19  
20  
21  
22  
23  
24  
25  
26  
27  
28  
29  
30  
31  
32  
33  
34  
35  
36  
37  
38  
39  
40  
41  
42  
43  
44  
45  
46  
47

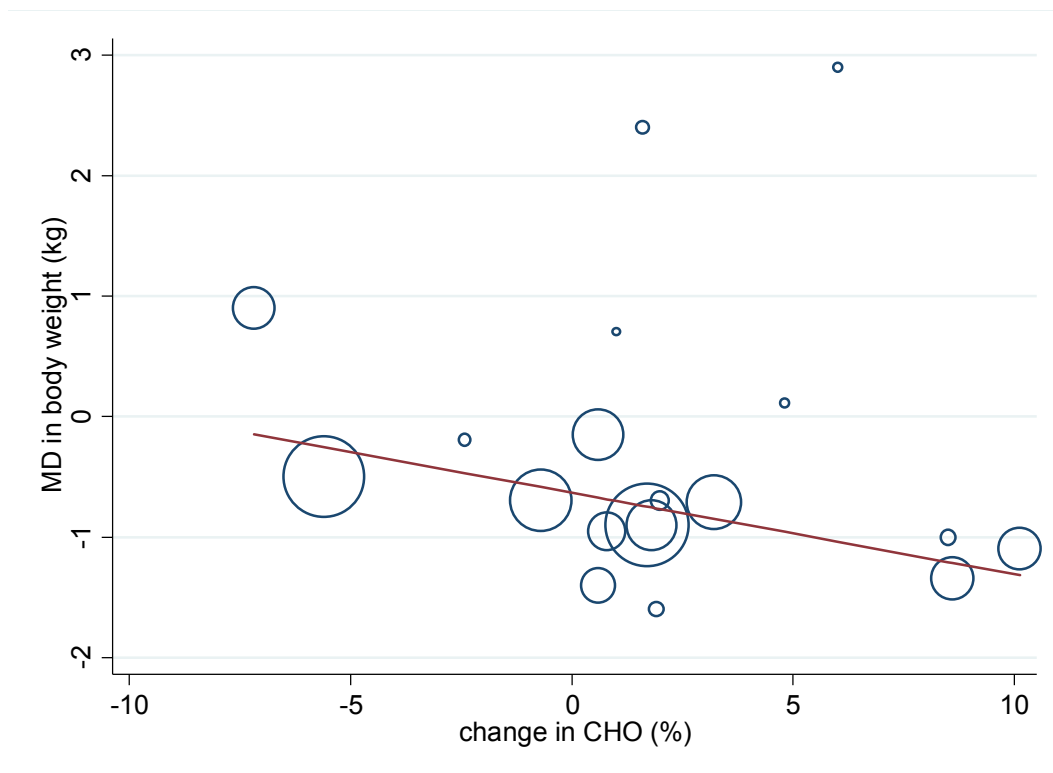

**Supplemental Figure S21: Continuous meta-regression of change in carbohydrate intake in the low-GI dietary pattern intervention arms with change in body weight (n=19)**

CHO, carbohydrate; MD, mean difference

review only



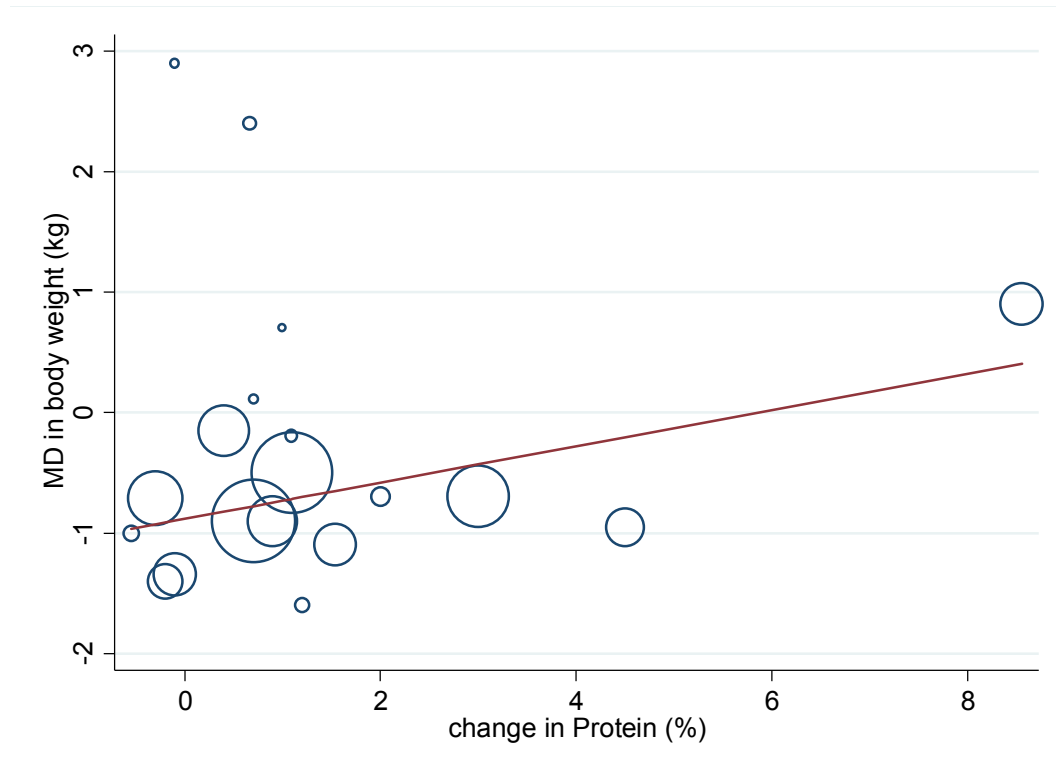

**Supplemental Figure S22: Continuous meta-regression of change in protein intake in the low-GI dietary pattern intervention arms with change in body weight (n=19)**

MD, mean difference

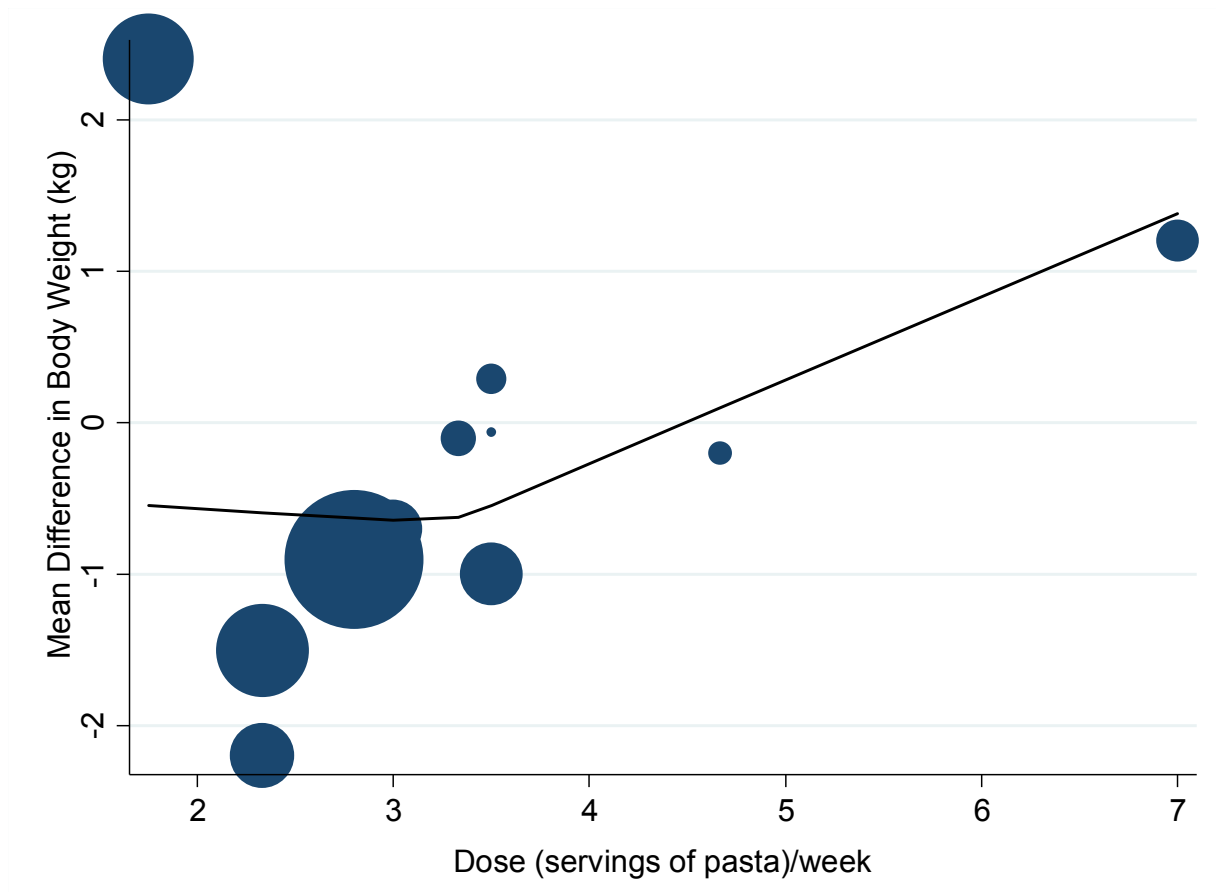

**Supplemental Figure S23: Pasta intake dose-response analyses by spline curve modeling (MKSPLINE procedure)**

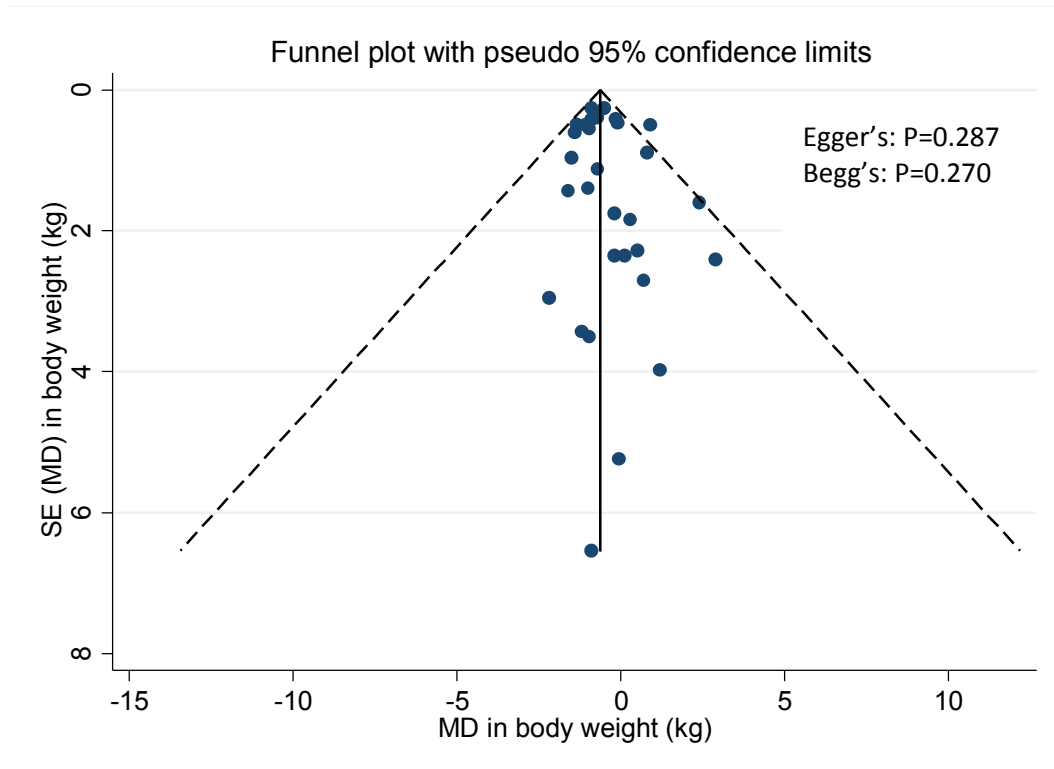

**Supplemental Figure S24: Funnel plot for the effect of pasta in the context of low-GI dietary patterns on body weight (kg)**

The solid line represents the overall pooled estimate for all studies included in the meta-analysis expressed as a weighted mean difference. Dashed lines represent 95% CIs. P values are derived from the quantitative assessment of publication bias by Egger's and Begg's tests.

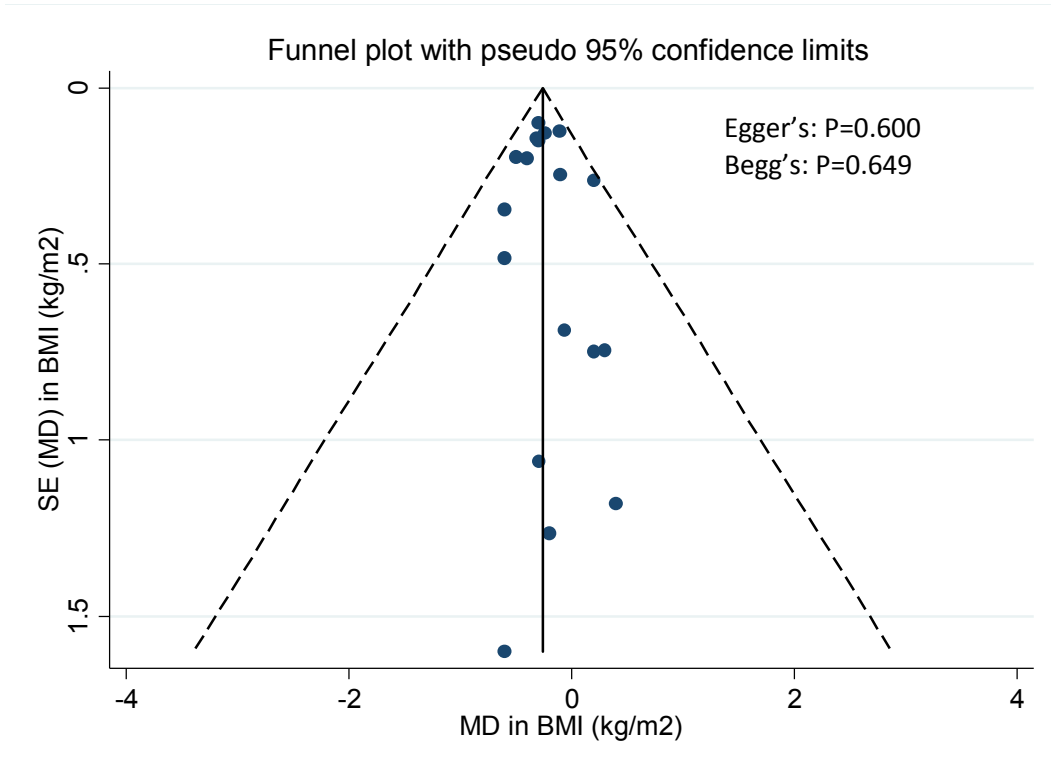

28  
29  
30  
31

**Supplemental Figure S25: Funnel plot for the effect of pasta in the context of low-GI dietary patterns on BMI (kg/m<sup>2</sup>)**

32  
33  
34  
35  
36  
37  
38  
39  
40  
41  
42  
43  
44  
45  
46  
47  
48  
49  
50  
51  
52  
53  
54  
55  
56  
57  
58  
59  
60

The solid line represents the overall pooled estimate for all studies included in the meta-analysis expressed as a weighted mean difference. Dashed lines represent 95% CIs. P values are derived from the quantitative assessment of publication bias by Egger's and Begg's tests.

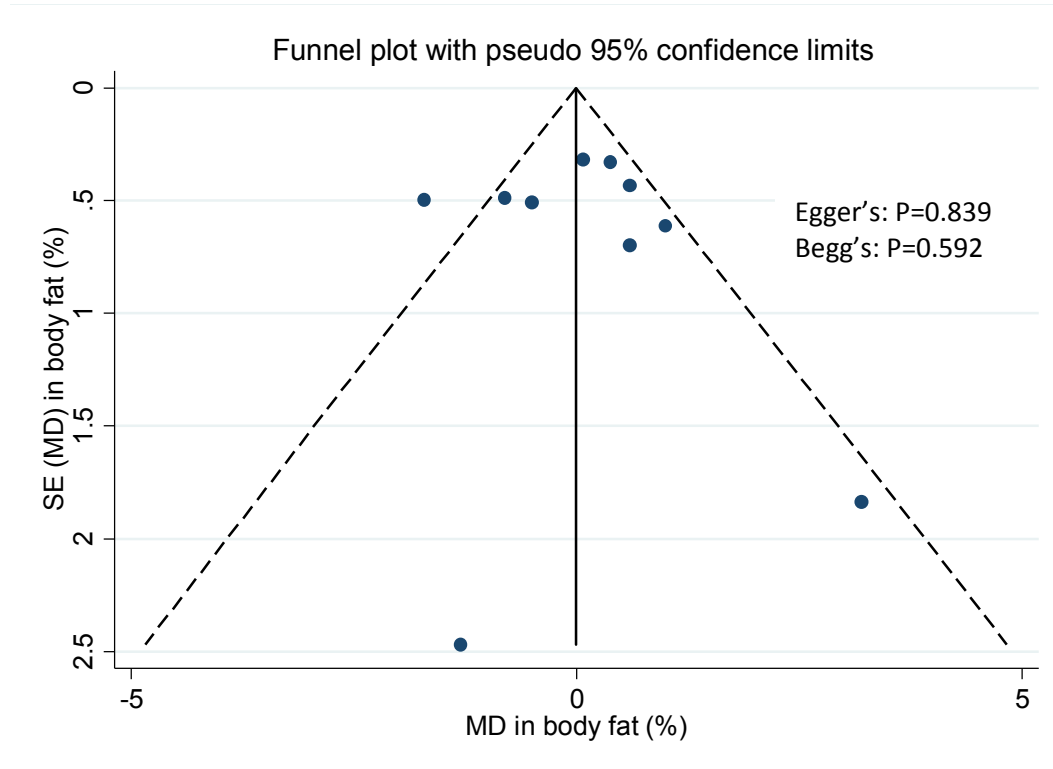

28  
29  
30  
31  
32

**Supplemental Figure S26: Funnel plot for the effect of pasta in the context of low-GI dietary patterns on body fat (%)**

33  
34  
35  
36  
37  
38  
39  
40  
41  
42  
43  
44  
45  
46  
47  
48  
49  
50  
51  
52  
53  
54  
55  
56  
57  
58  
59  
60

The solid line represents the overall pooled estimate for all studies included in the meta-analysis expressed as a weighted mean difference. Dashed lines represent 95% CIs. P values are derived from the quantitative assessment of publication bias by Egger's and Begg's tests.

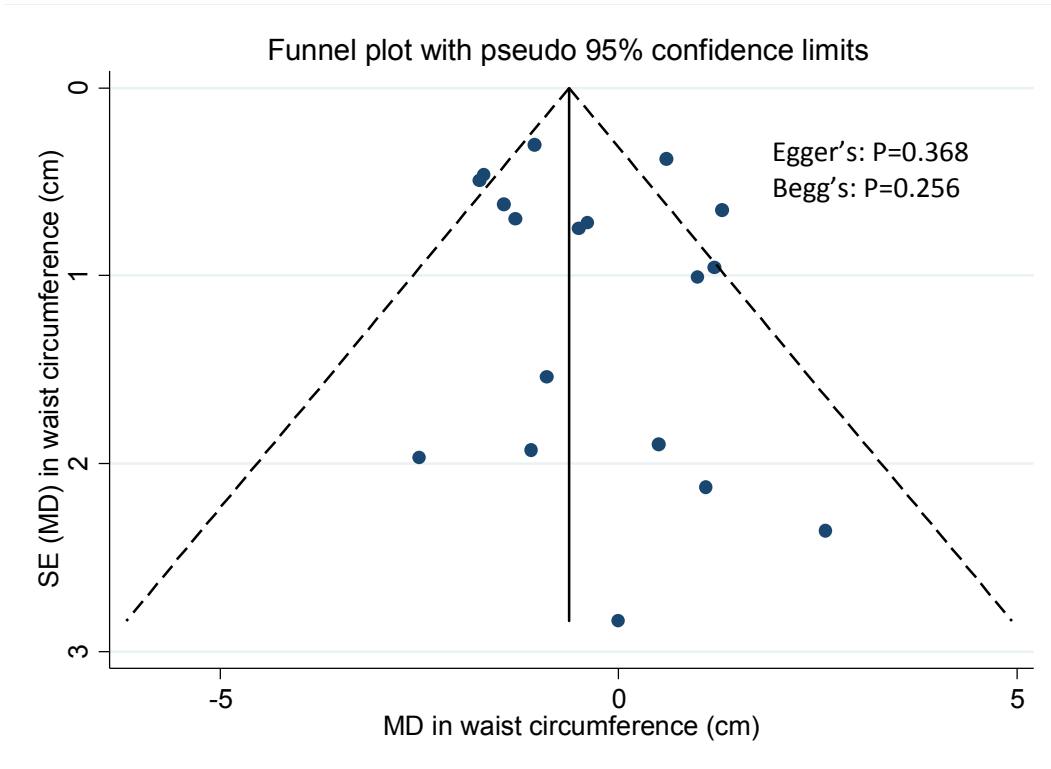

29 **Supplemental Figure S27: Funnel plot for the effect of pasta in the context of low-GI**  
30 **dietary patterns on waist circumference (cm)**

31 The solid line represents the overall pooled estimate for all studies included in the meta-analysis  
32 expressed as a weighted mean difference. Dashed lines represent 95% CIs. P values are derived  
33 from the quantitative assessment of publication bias by Egger's and Begg's tests.  
34  
35  
36  
37  
38  
39  
40  
41  
42  
43  
44  
45  
46  
47  
48  
49  
50  
51  
52  
53  
54  
55  
56  
57  
58  
59  
60

## Supplemental Table S12: PRISMA Checklist

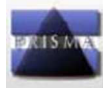

## PRISMA 2009 Checklist

| Section/topic             | #  | Checklist item                                                                                                                                                                                                                                                                                              | Reported on page #         |
|---------------------------|----|-------------------------------------------------------------------------------------------------------------------------------------------------------------------------------------------------------------------------------------------------------------------------------------------------------------|----------------------------|
| <b>TITLE</b>              |    |                                                                                                                                                                                                                                                                                                             |                            |
| Title                     | 1  | Identify the report as a systematic review, meta-analysis, or both.                                                                                                                                                                                                                                         | 1                          |
| <b>ABSTRACT</b>           |    |                                                                                                                                                                                                                                                                                                             |                            |
| Structured summary        | 2  | Provide a structured summary including, as applicable: background; objectives; data sources; study eligibility criteria, participants, and interventions; study appraisal and synthesis methods; results; limitations; conclusions and implications of key findings; systematic review registration number. | 2-3                        |
| <b>INTRODUCTION</b>       |    |                                                                                                                                                                                                                                                                                                             |                            |
| Rationale                 | 3  | Describe the rationale for the review in the context of what is already known.                                                                                                                                                                                                                              | 4                          |
| Objectives                | 4  | Provide an explicit statement of questions being addressed with reference to participants, interventions, comparisons, outcomes, and study design (PICOS).                                                                                                                                                  | 4                          |
| <b>METHODS</b>            |    |                                                                                                                                                                                                                                                                                                             |                            |
| Protocol and registration | 5  | Indicate if a review protocol exists, if and where it can be accessed (e.g., Web address), and, if available, provide registration information including registration number.                                                                                                                               | 5                          |
| Eligibility criteria      | 6  | Specify study characteristics (e.g., PICOS, length of follow-up) and report characteristics (e.g., years considered, language, publication status) used as criteria for eligibility, giving rationale.                                                                                                      | 5-6, Supplemental Table S2 |
| Information sources       | 7  | Describe all information sources (e.g., databases with dates of coverage, contact with study authors to identify additional studies) in the search and date last searched.                                                                                                                                  | 5, Supplemental Table S1   |
| Search                    | 8  | Present full electronic search strategy for at least one database, including any limits used, such that it could be repeated.                                                                                                                                                                               | Supplemental Table S1      |
| Study selection           | 9  | State the process for selecting studies (i.e., screening, eligibility, included in systematic review, and, if applicable, included in the meta-analysis).                                                                                                                                                   | 5, Figure 1                |
| Data collection process   | 10 | Describe method of data extraction from reports (e.g., piloted forms, independently, in duplicate) and any processes for obtaining and confirming data from investigators.                                                                                                                                  | 6                          |
| Data items                | 11 | List and define all variables for which data were sought (e.g., PICOS, funding sources) and any assumptions and                                                                                                                                                                                             | 6, Supplemental            |

|                                    |    |                                                                                                                                                                                                                        |          |
|------------------------------------|----|------------------------------------------------------------------------------------------------------------------------------------------------------------------------------------------------------------------------|----------|
|                                    |    | simplifications made.                                                                                                                                                                                                  | Table S2 |
| Risk of bias in individual studies | 12 | Describe methods used for assessing risk of bias of individual studies (including specification of whether this was done at the study or outcome level), and how this information is to be used in any data synthesis. | 6        |
| Summary measures                   | 13 | State the principal summary measures (e.g., risk ratio, difference in means).                                                                                                                                          | 7        |
| Synthesis of results               | 14 | Describe the methods of handling data and combining results of studies, if done, including measures of consistency (e.g., $I^2$ ) for each meta-analysis.                                                              | 7-9      |

| Section/topic                 | #  | Checklist item                                                                                                                                                                                           | Reported on page #                             |
|-------------------------------|----|----------------------------------------------------------------------------------------------------------------------------------------------------------------------------------------------------------|------------------------------------------------|
| Risk of bias across studies   | 15 | Specify any assessment of risk of bias that may affect the cumulative evidence (e.g., publication bias, selective reporting within studies).                                                             | 9                                              |
| Additional analyses           | 16 | Describe methods of additional analyses (e.g., sensitivity or subgroup analyses, meta-regression), if done, indicating which were pre-specified.                                                         | 7-8                                            |
| <b>RESULTS</b>                |    |                                                                                                                                                                                                          |                                                |
| Study selection               | 17 | Give numbers of studies screened, assessed for eligibility, and included in the review, with reasons for exclusions at each stage, ideally with a flow diagram.                                          | 9-11, Figure 1                                 |
| Study characteristics         | 18 | For each study, present characteristics for which data were extracted (e.g., study size, PICOS, follow-up period) and provide the citations.                                                             | 10-11, Table 1, Supplemental Tables S2-S3      |
| Risk of bias within studies   | 19 | Present data on risk of bias of each study and, if available, any outcome level assessment (see item 12).                                                                                                | 11, Supplemental Figures S1-S2                 |
| Results of individual studies | 20 | For all outcomes considered (benefits or harms), present, for each study: (a) simple summary data for each intervention group (b) effect estimates and confidence intervals, ideally with a forest plot. | 11-12, Figures 2-3, Supplemental Figures S3-S7 |
| Synthesis of results          | 21 | Present results of each meta-analysis done, including confidence intervals and measures of consistency.                                                                                                  | 11-12, Figures 2-3, Supplemental Figures S3-S7 |
| Risk of bias across studies   | 22 | Present results of any assessment of risk of bias across studies (see item 15).                                                                                                                          | 11, Supplemental                               |



|                     |    |                                                                                                                                                                                      |                                                                |
|---------------------|----|--------------------------------------------------------------------------------------------------------------------------------------------------------------------------------------|----------------------------------------------------------------|
|                     |    |                                                                                                                                                                                      | Table S1, S2, S12, S15, S17, S20                               |
| Additional analysis | 23 | Give results of additional analyses, if done (e.g., sensitivity or subgroup analyses, meta-regression [see Item 16]).                                                                | 12-15, Supplemental Tables S4-S10, Supplemental Figures S8-S26 |
| <b>DISCUSSION</b>   |    |                                                                                                                                                                                      |                                                                |
| Summary of evidence | 24 | Summarize the main findings including the strength of evidence for each main outcome; consider their relevance to key groups (e.g., healthcare providers, users, and policy makers). | 16-19                                                          |
| Limitations         | 25 | Discuss limitations at study and outcome level (e.g., risk of bias), and at review-level (e.g., incomplete retrieval of identified research, reporting bias).                        | 19-21                                                          |
| Conclusions         | 26 | Provide a general interpretation of the results in the context of other evidence, and implications for future research.                                                              | 21-22                                                          |
| <b>FUNDING</b>      |    |                                                                                                                                                                                      |                                                                |
| Funding             | 27 | Describe sources of funding for the systematic review and other support (e.g., supply of data); role of funders for the systematic review.                                           | 25-26                                                          |

From: Moher D, Liberati A, Tetzlaff J, Altman DG, The PRISMA Group (2009). Preferred Reporting Items for Systematic Reviews and Meta-Analyses: The PRISMA Statement. PLoS Med 6(7): e1000097. doi:10.1371/journal.pmed1000097

For more information, visit: [www.prisma-statement.org](http://www.prisma-statement.org).

# BMJ Open

## Effect of Pasta in the Context of Low Glycemic Index Dietary Patterns on Body Weight and Markers of Adiposity: A Systematic Review and Meta-analysis of Randomized Controlled Trials in Adults

|                                 |                                                                                                                                                                                                                                                                                                                                                                                                                                                                                                                                                                                                                                                                                                                                                                                                                                                                                                                                                                                                |
|---------------------------------|------------------------------------------------------------------------------------------------------------------------------------------------------------------------------------------------------------------------------------------------------------------------------------------------------------------------------------------------------------------------------------------------------------------------------------------------------------------------------------------------------------------------------------------------------------------------------------------------------------------------------------------------------------------------------------------------------------------------------------------------------------------------------------------------------------------------------------------------------------------------------------------------------------------------------------------------------------------------------------------------|
| Journal:                        | <i>BMJ Open</i>                                                                                                                                                                                                                                                                                                                                                                                                                                                                                                                                                                                                                                                                                                                                                                                                                                                                                                                                                                                |
| Manuscript ID                   | bmjopen-2017-019438.R1                                                                                                                                                                                                                                                                                                                                                                                                                                                                                                                                                                                                                                                                                                                                                                                                                                                                                                                                                                         |
| Article Type:                   | Research                                                                                                                                                                                                                                                                                                                                                                                                                                                                                                                                                                                                                                                                                                                                                                                                                                                                                                                                                                                       |
| Date Submitted by the Author:   | 08-Dec-2017                                                                                                                                                                                                                                                                                                                                                                                                                                                                                                                                                                                                                                                                                                                                                                                                                                                                                                                                                                                    |
| Complete List of Authors:       | Chiavaroli, Laura; St. Michael's Hospital, Toronto 3D Knowledge Synthesis and Clinical Trials Unit; University of Toronto, Nutritional Sciences<br>Kendall, Cyril; University of Toronto, Nutritional Sciences<br>Braunstein, Catherine; University of Toronto, Nutritional Sciences; St. Michael's Hospital, Toronto 3D Knowledge Synthesis and Clinical Trials Unit<br>Blanco Mejia, Sonia; Clinical Nutrition and Risk Factor Modification Centre, St. Michael's Hospital; Toronto 3D Knowledge Synthesis and Clinical Trials Unit, St. Michael's Hospital<br>Leiter, Lawrence; St. Michael's Hospital, Endocrinology; University of Toronto, Nutritional Sciences<br>Jenkins, David; St. Michael's Hospital, Clinical Nutrition and Risk Factor Modification Center; University of Toronto, Nutritional Sciences<br>Sievenpiper, John; McMaster University, Department of Pathology and Molecular Medicine; St. Michael's Hospital, Clinical Nutrition and Risk Factor Modification Centre |
| <b>Primary Subject Heading</b>: | Nutrition and metabolism                                                                                                                                                                                                                                                                                                                                                                                                                                                                                                                                                                                                                                                                                                                                                                                                                                                                                                                                                                       |
| Secondary Subject Heading:      | Cardiovascular medicine                                                                                                                                                                                                                                                                                                                                                                                                                                                                                                                                                                                                                                                                                                                                                                                                                                                                                                                                                                        |
| Keywords:                       | body weight, pasta, glycemic index, glycaemic index, systematic review and meta-analysis, weight loss                                                                                                                                                                                                                                                                                                                                                                                                                                                                                                                                                                                                                                                                                                                                                                                                                                                                                          |
|                                 |                                                                                                                                                                                                                                                                                                                                                                                                                                                                                                                                                                                                                                                                                                                                                                                                                                                                                                                                                                                                |

SCHOLARONE™  
Manuscripts

1  
2  
3 **1 Effect of Pasta in the Context of Low Glycemic Index Dietary Patterns on Body Weight**  
4 **2 and Markers of Adiposity: A Systematic Review and Meta-analysis of Randomized**  
5 **3 Controlled Trials in Adults**

6  
7  
8 4 Laura Chiavaroli<sup>1,2</sup>, Cyril WC Kendall<sup>1,2,3</sup>, Catherine R Braunstein<sup>1,2</sup>, Sonia Blanco Mejia<sup>1,2</sup>,  
9 5 Lawrence A Leiter<sup>1,2,4-6</sup>, David JA Jenkins<sup>1,2,4-6</sup>, John L Sievenpiper<sup>1,2,4-6</sup>

10  
11 6 1 Department of Nutritional Sciences, University of Toronto, Toronto, Canada

12  
13 7 2 Toronto 3D Knowledge Synthesis and Clinical Trials Unit, St. Michael's Hospital, Toronto,  
14 8 Canada

15  
16 9 3 College of Pharmacy and Nutrition, University of Saskatchewan, Saskatoon, Canada

17  
18 10 4 Department of Medicine, University of Toronto, Toronto, Canada

19  
20 11 5 Li Ka Shing Knowledge Institute, St. Michael's Hospital, Toronto, Canada

21  
22 12 6 Division of Endocrinology and Metabolism, St. Michael's Hospital, Toronto, Canada

23  
24  
25  
26 13

27  
28 14 Corresponding Author:

29  
30 15 Dr. John L Sievenpiper, MD, PhD, FRCPC, St. Michael's Hospital, #6137-61 Queen Street East,  
31 16 Toronto, ON, M5C 2T2, CANADA

32  
33 17 Telephone: +1 416 867 7475; Fax: +1 416 867 7495; Email: [john.sievenpiper@utoronto.ca](mailto:john.sievenpiper@utoronto.ca)

34 18

35  
36 19 Word Count: 4,968

37  
38 20 Tables: 1

39  
40 21 Figures: 3

41  
42 22 Online only supplementary material included

43  
44  
45 23

46 24 **Keywords:** body weight, pasta, glycemic index, glycaemic index, systematic review and meta-  
47  
48  
49 25 analysis, weight loss

50  
51 26

52  
53 27

54  
55 28

1  
2  
3 **29 ABSTRACT**  
4

5 **30 Objective:** Carbohydrates have been implicated in the obesity epidemic. To assess the effect of  
6  
7  
8 **31** pasta alone or pasta in the context of low glycemic index (GI) dietary patterns on adiposity, we  
9  
10 **32** conducted a systematic review and meta-analysis.  
11

12  
13 **33**  
14 **34 Design:** Systematic review and meta-analysis of randomized controlled trials (RCTs) with  
15  
16  
17 **35** GRADE assessment.  
18

19 **36**  
20  
21 **37 Eligibility criteria for selecting studies:** MEDLINE, Embase, CINAHL, and the Cochrane  
22  
23  
24 **38** Library were searched through 07 February 2017. We included RCTs  $\geq 3$ -weeks assessing the  
25  
26 **39** effect of pasta alone or in the context of low-GI dietary patterns on measures of global (body  
27  
28 **40** weight, BMI, body fat) and regional (waist circumference [WC], waist-to-hip ratio [WHR],  
29  
30 **41** sagittal abdominal diameter [SAD]) adiposity in adults. Two independent reviewers extracted  
31  
32 **42** data and assessed risk of bias. Data were pooled using the generic inverse-variance method and  
33  
34 **43** expressed as mean differences (MDs) with 95% confidence intervals (95% CIs). Heterogeneity  
35  
36 **44** was assessed (Cochran Q statistic) and quantified ( $I^2$ -statistic). GRADE assessed the overall  
37  
38 **45** certainty of the evidence.  
39  
40  
41  
42  
43

44 **47 Results:** We identified no trials of the effect of pasta alone and 32 trial comparisons (n=2,448  
45  
46 **48** participants) of the effect of pasta in the context of low-GI dietary patterns. Pasta in the context  
47  
48 **49** of low-GI dietary patterns significantly reduced body weight (MD=-0.63kg [95% CIs, -0.84, -  
49  
50 **50** 0.42kg]) and BMI (MD=-0.26kg/m<sup>2</sup> [95% CIs, -0.36, -0.16kg/m<sup>2</sup>]) compared with higher-GI  
51  
52 **51** dietary patterns. There was no effect on other measures of adiposity. The overall certainty of the  
53  
54  
55  
56  
57  
58  
59  
60

1  
2  
3 52 evidence was graded as moderate for body weight, BMI, WHR, and SAD and low for WC and  
4  
5 53 body fat.  
6  
7

8 54

9  
10 55 **Conclusions:** Available RCTs demonstrate that pasta in the context of low-GI dietary patterns  
11  
12 56 does not adversely affect adiposity and even reduces body weight and BMI compared to higher  
13  
14 57 GI dietary patterns. Future trials should assess the effect of pasta in the context of other healthy  
15  
16 58 dietary patterns.  
17  
18

19 59

20  
21 60 **Protocol registration:** ClinicalTrials.gov Identifier, NCT02961088  
22  
23

24 61

25 62

26  
27  
28 63 **Strengths and limitations of this study**  
29

30  
31 64 - The present systematic review and meta-analysis was based on a comprehensive search  
32  
33 65 and includes a large number of randomized controlled trials which provide the best  
34  
35 66 protection against bias.  
36

37  
38 67 - We used the Grading of Recommendations Assessment, Development, and Evaluation  
39  
40 68 (GRADE) system to evaluate the strength and quality of the evidence.  
41

42 69 - There was evidence of unexplained inconsistency in the intervention estimates across  
43  
44 70 trials for waist circumference and body fat.  
45

46  
47 71 - The generalizability of our results is questionable with evidence of indirectness in the  
48  
49 72 pooled estimates for all body and adiposity outcomes, as all of the trials assessed pasta in  
50  
51 73 the context of low-GI dietary patterns (no trials assessed the effect of pasta alone or in the  
52  
53  
54  
55  
56  
57  
58  
59  
60

1  
2  
3 74 context of other dietary patterns) and most of the available trials did not quantify the  
4  
5 75 amount of pasta consumed.  
6  
7  
8  
9  
10  
11  
12  
13  
14  
15  
16  
17  
18  
19  
20  
21  
22  
23  
24  
25  
26  
27  
28  
29  
30  
31  
32  
33  
34  
35  
36  
37  
38  
39  
40  
41  
42  
43  
44  
45  
46  
47  
48  
49  
50  
51  
52  
53  
54  
55  
56  
57  
58  
59  
60

For peer review only

## INTRODUCTION

As the role of saturated fat in chronic disease has been called into question, carbohydrates have come under attack in the media<sup>1,2</sup>, popular books<sup>3-9</sup>, statements of health advocacy groups<sup>10</sup> and commentaries in leading medical journals<sup>11,12</sup>. Much of the attention has focused on sugars but traditional carbohydrate staples like pasta, rice, and breads are increasingly being implicated in the epidemics of overweight and obesity<sup>1,7</sup>. Although advantages for weight related outcomes have been shown for dietary patterns that are high in these foods but low in glycemic index (GI)<sup>13,14</sup>, high in whole grains<sup>15,16</sup>, and/or high in dietary fibre<sup>17,18</sup>, there has been a general lack of recognition of the importance of carbohydrate quality.

Pasta is an important example of a food which is considered a refined carbohydrate but has a low-GI, a property that has been exploited extensively in studies of low-GI dietary patterns. It remains unclear whether pasta alone or in the context of a low-GI dietary pattern contributes to weight gain<sup>1,7</sup>. We undertook a systematic review and meta-analysis of randomized controlled trials (RCTs) with a full GRADE assessment to quantify the effect of pasta alone or in the context of low-GI dietary patterns on body weight and measures of adiposity relevant to the prevention and management of overweight and obesity.

## METHODS

### Design

Our protocol followed the guideline of the Cochrane Handbook for Systematic Reviews of Interventions<sup>19</sup>, and findings are reported according to the guidelines of the Preferred Reporting

1  
2  
3 98 Items for Systematic Reviews and Meta-Analyses<sup>20</sup> (**Supplemental Table S1**). The protocol is  
4  
5 99 registered at clinicaltrials.gov (identifier, NCT02961088).  
6  
7  
8 100

### 101 **Data sources and searches**

102 We searched MEDLINE (<http://www.nlm.nih.gov/bsd/pmresources.html>), Embase  
103 (<https://www.embase.com>), CINAHL (<https://health.ebsco.com/products/the-cinahl-database>),  
104 and the Cochrane Library (<http://www.cochranelibrary.com/>) from inception through 07  
105 February 2017. The full search terms used in this study are presented in **Supplemental Tables**  
106 **S2-S3**. Briefly, we searched using variations of the terms pasta and glycemic index and glycemic  
107 load and body weight and BMI. The search was limited to human studies and had no language  
108 restrictions. Reference lists of selected studies and reviews were also searched to identify  
109 additional articles.  
110

### 111 **Study selection**

112 We include RCTs that investigated the effect of pasta consumed alone or in the context of low-  
113 GI dietary patterns that emphasized pasta in comparison with higher GI diets that did not include  
114 pasta on body weight or other measures of global (BMI, body fat) or abdominal (waist  
115 circumference, waist-to-hip ratio, sagittal abdominal diameter, or visceral adipose tissue assessed  
116 by imaging modalities) adiposity in participants of all health backgrounds. Trials were included  
117 if the intervention arm assessed the effect of pasta consumed alone or assessed the effect of a low  
118 GI diet which emphasized pasta as part of the low GI dietary advice. Trials were excluded if they  
119 had diet duration of <3 weeks, did not intend to use a calorie- and macronutrient-matched  
120 comparator arm that was higher in GI; included pregnant or breast-feeding women or children; or



1  
2  
3 121 did not provide suitable end-point data. When multiple publications existed for the same study,  
4  
5 122 the article with the most information was included (n=6). Published abstracts were not included.  
6  
7

8 123

9  
10 124 **Data extraction**

11  
12 125 Two reviewers (LC, CB) assessed the titles and abstracts of all identified studies and  
13  
14 126 independently reviewed and extracted relevant data from each report, including study design,  
15  
16 127 blinding, sample size, participant characteristics, follow-up duration, identification of pasta in the  
17  
18 128 low-GI diet only, comparator diet, macronutrient profile, funding source, and outcome data. The  
19  
20 129 primary outcome was body weight, and secondary outcomes included markers of global (BMI,  
21  
22 130 body fat) and abdominal (waist circumference, waist-to-hip ratio, sagittal abdominal diameter, or  
23  
24 131 visceral adipose tissue assessed by imaging modalities) adiposity. Mean±SD differences between  
25  
26 132 test and control arms were extracted for each outcome.  
27  
28

29  
30  
31 133 In those trials where the data were included in figures and not provided numerically, we used the  
32  
33 134 software program Plot Digitizer (<http://plotdigitizer.sourceforge.net/>) to extract the data.  
34

35 135 Additional information was requested from the authors of all included trials. Disagreement were  
36  
37 136 resolved by consensus or where necessary by a third author (SBM).  
38

39  
40 137

41  
42 138 **Risk of bias assessment**

43  
44 139 Risk of bias for each individual study was assessed using the Cochrane Risk of Bias tool<sup>19</sup>. The  
45  
46 140 level of bias was evaluated for sequence generation, allocation concealment, blinding,  
47  
48 141 incomplete outcome data, and selective reporting and determined overall as either low (proper  
49  
50 142 methods taken to reduce bias), high (improper methods creating bias), or unclear (insufficient  
51  
52 143 information provided to determine the bias level).  
53  
54  
55  
56  
57  
58  
59  
60

1  
2  
3 1444  
5 **145 Statistical analysis**

6  
7  
8 146 Baseline, end-of-study, and between-treatment differences in body weight, BMI, waist  
9  
10 147 circumference, body fat, waist-to-hip ratio, sagittal abdominal diameter or visceral adipose tissue  
11  
12 148 assessed by imaging modalities were recorded as means±SDs. If not provided, between-  
13  
14 149 treatment differences in change-from-baseline or end differences were calculated by subtracting  
15  
16 150 means and variance measures such as SEs were imputed with the use of published formulas<sup>19</sup>.  
17  
18  
19 151 Missing SDs were imputed with the use of the pooled SD from other studies included in the  
20  
21 152 analysis<sup>19</sup>.

22  
23  
24 153 Data analyses were conducted using Review Manager version 5.3 (RevMan) (Copenhagen,  
25  
26 154 Denmark: The Nordic Cochrane Centre, The Cochrane Collaboration, 2014) for primary  
27  
28 155 analyses and Stata version 13 (College Station, TX: StataCorp LP) for subgroup analyses. A  
29  
30 156 generic inverse-variance method with random-effects models was used to calculate pooled mean  
31  
32 157 differences and 95% confidence intervals (CIs). Random-effects models were used even in the  
33  
34 158 absence of statistically significant inter-study heterogeneity, as they yield more conservative  
35  
36 159 summary effect estimates in the presence of residual heterogeneity. Change-from-baseline  
37  
38 160 differences were preferred over end differences and paired analyses were applied to all crossover  
39  
40 161 trials with the use of a within-individual correlation coefficient between treatments of 0.5 as  
41  
42 162 described by Elbourne et al.<sup>21</sup>

43  
44  
45  
46  
47 163 Inter-study heterogeneity was assessed by the Cochran Q statistic, where  $P < 0.10$  was considered  
48  
49 164 statistically significant, and quantified by the  $I^2$  statistic, where  $I^2 \geq 50\%$  indicates substantial  
50  
51 165 heterogeneity<sup>19</sup>. Sensitivity analysis were performed which included the removal of each single  
52  
53 166 study from the meta-analyses one at a time and recalculation of the summary effect. An

1  
2  
3 167 influential study was considered a study whose removal changed the magnitude of the pooled  
4  
5 168 effect by >10%. Sensitivity analysis were also conducted using different correlation coefficient  
6  
7  
8 169 values for crossover trials (0.25 and 0.75) to test for the robustness of the effect size, conducting  
9  
10 170 analyses using fixed effects models and restricting analyses to those trials for which pasta intake  
11  
12 171 could be quantified.

14 172 If  $\geq 10$  trial comparisons were available, then sources of heterogeneity were explored by  
15  
16 173 subgroup analyses. A priori categorical subgroups analyses were assessed by meta-regression  
17  
18 174 analyses. These included patient type (normal body weight, overweight or obese [average  
19  
20 175 baseline BMI  $>27\text{kg/m}^2$ ]), diabetes, coronary heart disease), follow-up ( $<24$ -weeks,  $\geq 24$  weeks),  
21  
22 176 baseline BMI (BMI  $\leq 30$ ,  $>30\text{kg/m}^2$ ), design (parallel, crossover), energy balance (negative on  
23  
24 177 both arms [weight loss diets], neutral on both arms [weight maintaining diets]) and dose of pasta  
25  
26 178 (based on the median). A priori categorical subgroup analyses also included the following dietary  
27  
28 179 factors: GI (absolute level [ $\leq 55$ ,  $>55$ ; glucose scale], within-treatment change, between-treatment  
29  
30 180 change), fat intake (absolute level [ $<30\%$ ,  $\geq 30\%$  energy], within-treatment change, between-  
31  
32 181 treatment change), carbohydrate intake (absolute level [ $<50\%$ ,  $\geq 50\%$  energy], within-treatment  
33  
34 182 change, between-treatment change), protein intake (absolute level [ $<20\%$ ,  $\geq 20\%$  energy], within-  
35  
36 183 treatment change, between-treatment change), dietary fibre intake (absolute level [ $<28\text{g/day}$ ,  
37  
38 184  $\geq 28\text{g/day}$ ], within-treatment change, between-treatment change), and risk of bias. A priori  
39  
40 185 continuous meta-regression analyses were conducted on the absolute levels and within- and  
41  
42 186 between-treatment changes of these same dietary factors in the intervention arms of pasta in the  
43  
44 187 context of low-GI dietary patterns. Linear and non-linear pasta intake dose-response analyses  
45  
46 188 were assessed by using continuous meta-regression analyses and spline curve modeling  
47  
48 189 (MKSPLINE procedure), respectively. Publication bias was assessed by visual inspection of  
49  
50  
51  
52  
53  
54  
55  
56  
57  
58  
59  
60

1  
2  
3 190 funnel plots and the Egger<sup>22</sup> and Begg<sup>23</sup> tests, when  $\geq 10$  trial comparisons were available. If  
4  
5 191 publication bias was suspected, then adjustment for funnel plot asymmetry was done by imputing  
6  
7 192 missing study data using the Duval and Tweedie trim and fill method<sup>24</sup>.  
8  
9

10 193

### 11 12 194 **Grading the evidence**

13  
14 195 The grading of recommendations assessment, development, and evaluation (GRADE) approach  
15  
16 196 was used to assess the certainty of the evidence<sup>25</sup>. Evidence was graded as high, moderate, low  
17  
18 197 or very low quality. The included RCTs were graded as high quality evidence by default and  
19  
20 198 downgraded based on pre-specified criteria. Criteria to downgrade evidence included risk of bias  
21  
22 199 (weight of studies show risk of bias assessed by the Cochrane Risk of Bias tool), inconsistency  
23  
24 200 (substantial unexplained heterogeneity,  $I^2 > 50\%$ ,  $P < 0.10$ ), indirectness (presence of factors that  
25  
26 201 limited the generalizability of the results), imprecision (the 95% CI for effect estimates were  
27  
28 202 wide or crossed pre-specified minimally important differences [MIDs] for harm), and publication  
29  
30 203 bias (significant evidence of small-study effects).  
31  
32  
33  
34

35 204

### 36 37 38 205 **Patient involvement**

39  
40  
41 206 No patients were directly involved in the development of the research question, selection of the  
42  
43 207 outcome measures, design and implementation of the study, or interpretation of the results.  
44  
45

46 208

## 47 48 209 **RESULTS**

49  
50 210

### 51 52 53 211 **Search results**

54

55

56

57

58

59

60

1  
2  
3 212 **Figure 1** shows the flow of the literature. We identified 4876 reports of which 29 met eligibility  
4  
5 213 criteria. No reports were identified that assessed the effect of pasta alone, while 29 reports  
6  
7 214 (including 32 trial comparisons involving 2448 participants) were identified that assessed the  
8  
9 215 effect of pasta in the context of low-GI dietary patterns on any adiposity outcome in adults<sup>26-54</sup>.  
10  
11 216 Of the 32 trial comparisons that assessed the effect of pasta in the context of a low-GI dietary  
12  
13 217 pattern, there were 32 trial comparisons for body weight, 18 trial comparisons for BMI<sup>27,28,31-  
14  
15 218 33,35,36,39-41,43-46,48,49,52,53</sup>, 18 trial comparisons for waist circumference<sup>27,28,31,33,34,36,38-40,42,44-47,52,53</sup>,  
16  
17 219 10 trial comparisons for body fat<sup>27,28,31-33,36,38,41,43,53</sup>, 6 trial comparisons for waist-to-hip  
18  
19 220 ratio<sup>31,39,40,44,45,52</sup>, and 3 trial comparisons for sagittal abdominal diameter<sup>34,39</sup>. There was only  
20  
21 221 one trial comparison identified<sup>35</sup> for visceral adipose tissue assessed by imaging modalities, thus  
22  
23 222 a meta-analysis could not be undertaken for this outcome.  
24  
25  
26  
27  
28  
29  
30

### 31 224 **Trial characteristics**

32  
33 225 **Table 1** and **Supplemental Table S4** show the characteristics of all included trials of the effect  
34  
35 226 of pasta in the context of low-GI dietary patterns. The majority of trials had a parallel design  
36  
37 227 (26/32) with a median follow-up of 12 weeks (IQR: 9–21 weeks) and a median number of  
38  
39 228 participants per trial of 43 (IQR: 21–112). Most participants were middle aged (median age: 50  
40  
41 229 y; IQR: 40-58 y) men and women (median ratio of men to women: 0.4:1 in available trials). The  
42  
43 230 median baseline BMI across studies was 30.4kg/m<sup>2</sup> (IQR: 28.2–32.0). Regarding metabolic  
44  
45 231 phenotype, 21 (66%) trials included participants who were overweight or obese (had a baseline  
46  
47 232 BMI $\geq$ 27kg/m<sup>2</sup>), 10 (31%) had diabetes and one trial (3%) with coronary heart disease (CHD).  
48  
49  
50 233 We did not retrieve any trials where participants had a normal BMI at baseline ( $\leq$ 25kg/m<sup>2</sup>),  
51  
52  
53  
54  
55  
56  
57  
58  
59  
60

1  
2  
3 234 although 6 trials did not include BMI >25 kg/m<sup>2</sup> as part of criteria, the average baseline BMI was  
4  
5 235 ≥27 kg/m<sup>2</sup>, therefore categorized as overweight.  
6  
7

8 236

9  
10 237 **Risk of bias**

11  
12 238 **Supplemental Figures S1 and S2** show the individual Cochrane Risk of Bias tool assessments  
13  
14 239 for each of the included trials of the effect of pasta in the context of low-GI dietary patterns. No  
15  
16 240 serious risk of bias was detected.  
17  
18

19 241

20  
21 242 **Effect of Pasta in the Context of Low-GI dietary patterns and Body Weight**

22  
23 243 **Figure 2** shows the effect of pasta in the context of low-GI dietary patterns on the primary  
24  
25 244 outcome body weight. Pooled analyses showed pasta in the context of low-GI dietary patterns  
26  
27 245 had the effect of reducing body weight by -0.63 kg (95% CI:-0.84, -0.42 kg; P<0.001) compared  
28  
29 246 with higher GI control diets with no evidence of heterogeneity (I<sup>2</sup>=0%, P-heterogeneity=0.51).  
30  
31

32 247

33  
34 248 **Effect of Pasta in the Context of Low-GI dietary patterns on Markers of Global Adiposity**

35  
36 249 **Figure 3 and Supplemental Figure S3-S4** show the effect of pasta in the context of low-GI  
37  
38 250 dietary patterns on markers of global adiposity. Pooled analyses showed that pasta in the context  
39  
40 251 of low-GI dietary patterns had the effect of reducing BMI by -0.26kg/m<sup>2</sup> (n=18 trials; MD=-  
41  
42 252 0.26kg/m<sup>2</sup>; 95% CI:-0.36, -0.16 kg/m<sup>2</sup>; P<0.001) compared with higher GI control diets with no  
43  
44 253 evidence of heterogeneity (I<sup>2</sup>=0%, P-heterogeneity=0.90). There was no effect on body fat (n=10  
45  
46 254 trials; MD=-0.01%, 95% CI:-0.58, 0.56%; P=0.98) with evidence of substantial heterogeneity  
47  
48 255 (I<sup>2</sup>=65%, P-heterogeneity<0.01).  
49  
50  
51  
52  
53

54 256

1  
2  
3 **257 Effect of Pasta in the Context of Low-GI dietary patterns on Markers of Abdominal**  
4  
5 **258 Adiposity**

6  
7 **259 Figure 3 and Supplemental Figures S5-S7** show the pooled estimates for the markers of  
8  
9 abdominal adiposity. Pooled analyses did not show a significant effect of pasta in the context of  
10  
11 abdominal adiposity. Pooled analyses did not show a significant effect of pasta in the context of  
12  
13 low-GI dietary patterns compared with higher-GI control diets on waist circumference (n=18  
14  
15 trials; MD=-0.46cm, 95% CI:-1.05, 0.14cm; P=0.13), waist-to-hip ratio (n=6 trials; MD=-0.00,  
16  
17 95% CI:-0.01, 0.00; P=0.27), or sagittal abdominal diameter (n=3 trials, MD=-0.09cm, 95% CI:-  
18  
19 0.34, 0.16cm; P=0.48) There was only evidence of substantial heterogeneity in the analyses for  
20  
21 waist circumference ( $I^2=62%$ , P-heterogeneity<0.01).  
22  
23

24  
25  
26 **267 Sensitivity analyses**

27  
28 We conducted four sets of sensitivity analyses (**Supplemental Tables S5-6, Supplemental**  
29  
30 **Figures S8-9**). The systematic removal of each trial did not modify the direction or significance  
31  
32 of the effect estimates or the evidence of heterogeneity for any of the outcomes with the  
33  
34 exception of waist circumference (**Supplemental Table S5**). In the sensitivity analysis for waist  
35  
36 circumference, two studies were influential studies in that their removal altered the magnitude of  
37  
38 the pooled effect in the remaining studies by >10%, where the removal of the studies of  
39  
40 McMillan-Price et al. (high protein comparison)<sup>42</sup> and Jenkins et al.<sup>44</sup> rendered the results for  
41  
42 waist circumference statistically significant (MD= -0.62cm; 95% CI: -1.19, -0.05; P=0.03) and  
43  
44 (MD= -0.61cm; 95% CI: -1.18, -0.04; P=0.04), respectively; forest plots not shown).  
45  
46 Heterogeneity remained significant in both cases ( $I^2= 55%$ , P-heterogeneity<0.01 and  $I^2=50%$ , P-  
47  
48 heterogeneity=0.01, respectively). Sensitivity analyses using correlation coefficients of 0.25 and  
49  
50 0.75 for paired analyses of crossover trials also did not modify the results (**Supplemental Table**  
51  
52  
53  
54  
55  
56  
57  
58  
59  
60

1  
2  
3 280 **S6)**. In the sensitivity analyses where fixed effects models were applied (**Supplemental Figure**  
4  
5 281 **S8)**, the direction, magnitude and significance of the pooled estimates were very similar to those  
6  
7 282 produced by the random effects models with the exception of the sensitivity analysis for waist  
8  
9 283 circumference which was significant (MD= -0.62; 95% CI: -0.93, -0.32; P<0.001). Finally,  
10  
11 284 restricting analyses to the 11 trials for which pasta intake could be quantified (median pasta  
12  
13 285 intake, 3.33 servings/week [range, 1.75 – 7 servings/week]) showed a similar reduction in body  
14  
15 286 weight (MD= -0.70 kg; 95% CI:-1.10, -0.29 kg; P<0.001) when pasta was consumed in the  
16  
17 287 context of low-GI dietary patterns compared with the higher GI control arms without evidence of  
18  
19 288 heterogeneity ( $I^2=0\%$ , P-heterogeneity=0.68) (**Supplemental Figure S9**).

23

### 24 289

#### 25 290 **Subgroup analyses**

26  
27 291 We were only able to conduct a priori categorical and continuous subgroup analyses for body  
28  
29 292 weight, BMI, body fat and waist circumference. Subgroup analyses for waist-to-hip ratio and  
30  
31 293 sagittal abdominal diameter could not be assessed, owing to <10 trial comparisons in each case.

32  
33 294 **Supplemental Figures S10-S12** show the categorical a priori subgroup analyses for body  
34  
35 295 weight. There was no evidence of significant effect modification in any of the subgroup analyses  
36  
37 296 for body weight, including no effect modification of follow-up when comparing studies less than  
38  
39 297 24 weeks duration to those greater than or equal to 24 weeks (-0.63kg vs -0.57kg, respectively)  
40  
41 298 (**Supplemental Figure S10**). Neither was there evidence of significant effect modification in any  
42  
43 299 of the subgroup analyses for BMI, body fat or waist circumference (**Supplemental Figures S13-**  
44  
45 300 **20**).

46  
47 301



1  
2  
3 302 **Supplemental Table S7** and **Supplemental Figures S21-22** show the continuous subgroup  
4  
5 303 analyses for body weight. There was evidence of significant effect modification by carbohydrate  
6  
7 304 and protein intake, where an increase in carbohydrate intake in the intervention group in which  
8  
9 305 pasta was consumed in the context of low-GI dietary patterns was associated with weight loss  
10  
11 306 ( $\beta = -0.07$ , 95% CI: -0.12, -0.01,  $I^2 = 0.00\%$ ,  $P = 0.02$ ), and an increase in protein intake in the  
12  
13 307 intervention group in which pasta was consumed in the context of low-GI dietary patterns was  
14  
15 308 associated with weight gain ( $\beta = 0.15$ , 95% CI: 0.03, 0.27,  $I^2 = 0.00\%$ ,  $P = 0.02$ ). None of the other  
16  
17 309 continuous subgroup analyses were significant. There was no evidence of significant effect  
18  
19 310 modification in any of the continuous subgroup analyses for BMI (**Supplemental Table S8**). For  
20  
21 311 body fat, there was evidence of significant effect modification in the continuous meta-regression  
22  
23 312 subgroup analysis of difference in GI between intervention and control groups, where greater  
24  
25 313 difference in GI between the groups was associated with greater reduction in body fat in the  
26  
27 314 intervention group ( $\beta = -0.09$ , 95% CI: -0.15, -0.03,  $I^2 = 19.39\%$ ,  $P = 0.01$ ) (**Supplemental Table**  
28  
29 315 **S9**). None of the other continuous subgroup analyses were significant. For waist circumference,  
30  
31 316 there was evidence of significant effect modification in the continuous meta-regression subgroup  
32  
33 317 analysis of absolute carbohydrate level and absolute protein level, where greater carbohydrate  
34  
35 318 level in the intervention group in which pasta was consumed in the context of low-GI dietary  
36  
37 319 patterns was associated with greater loss in waist circumference ( $\beta = -0.11$ , 95% CI: -0.19, -0.04,  
38  
39 320  $I^2 = 27.06\%$ ,  $P < 0.01$ ) and a lower protein level in the intervention group in which pasta was  
40  
41 321 consumed in the context of low-GI dietary patterns was associated with an increase in waist  
42  
43 322 circumference ( $\beta = 0.20$ , 95% CI: 0.01, 0.38,  $I^2 = 43.92\%$ ,  $P = 0.04$ ) (**Supplemental Table S10**).  
44  
45 323 None of the other continuous subgroup analyses were significant.  
46  
47  
48  
49  
50  
51  
52  
53  
54 324

### 325 **Dose-response analyses**

326 **Supplemental Tables S7 and S11** and **Supplemental Figure S23** show the dose-response  
327 analysis for the 11 trials for which pasta intake could be quantified. No evidence of a linear dose  
328 response was seen for pasta intake by meta-regression analyses (**Supplemental Table S7**).  
329 There was also no evidence of a non-linear dose response by MKSPLINE (P=0.85)  
330 (**Supplemental Figure S23**) or piecewise linear meta-regression analyses (**Supplemental Table**  
331 **S7**).

### 333 **Publication Bias**

334 **Supplemental Figures S24-S27** shows the funnel plots for body weight, BMI, body fat and  
335 waist circumference. There was no evidence of funnel-plot asymmetry. Formal testing with the  
336 Egger and Begg tests did not show evidence of small-study effects (P>0.05 for both). Publication  
337 bias was not assessed for waist-to-hip ratio and sagittal abdominal diameter, owing to <10 trial  
338 comparisons.

### 340 **GRADE Assessment**

341 **Supplemental Table S12** shows a summary of the GRADE assessments for the effect of pasta in  
342 the context of low-GI dietary patterns on body weight and measures of adiposity. The evidence  
343 was graded as moderate for body weight, BMI, waist-to-hip ratio and sagittal abdominal  
344 diameter owing to downgrades for indirectness and low for waist circumference and body fat,  
345 owing to downgrades for indirectness and inconsistency ( $I^2=59%$ , P-heterogeneity<0.001;  
346  $I^2=66%$ , P-heterogeneity<0.01, respectively).

347

## DISCUSSION

348

349 The present systematic review and meta-analysis quantified the effect of pasta alone and pasta in  
350 the context of low-GI dietary patterns on body weight and other markers of adiposity. We  
351 identified no trial comparisons for the effect of pasta alone and 32 trial comparisons involving  
352 2448 participants who were predominantly middle-aged and overweight or obese for the effect of  
353 pasta in the context of low-GI dietary patterns. The primary pooled analysis demonstrated that  
354 pasta in the context of low-GI dietary patterns did not contribute to weight gain, resulting in a  
355 significant weight loss of -0.63kg when compared to diets higher in GI over a median follow-up  
356 of 12 weeks. The lack of harm was reflected in the established clinical secondary outcome  
357 measures of global (BMI and body fat) and abdominal adiposity (waist circumference, waist-to-  
358 hip ratio and sagittal abdominal diameter). These findings were robust across subgroups. The  
359 findings did not differ by metabolic phenotype in those who were overweight or obese or had  
360 diabetes, which is noteworthy since these are populations who would benefit from weight  
361 management strategies. There was also no effect modification by the energy balance of the  
362 design such that the weight loss was seen even under conditions of neutral energy balance (in  
363 which participants were instructed to consume dietary advice ad libitum), suggesting that  
364 encouragement of the consumption of pasta in the context of a low-GI dietary patterns does not  
365 cause harm and may even lead to spontaneous weight loss. There was also no effect modification  
366 by follow-up either in continuous meta-regression or categorical, where the 24 trials with  
367 <24weeks follow-up had a weight reduction similar to those 8 trials with ≥24weeks follow-up (-  
368 0.63kg vs -0.57kg, respectively). This is of relevance since many dietary studies are successful in  
369 demonstrating weight loss in the short term but not over the long term.

370

### 371 **Findings in the context of existing studies**

372 We are not aware of any RCTs directly assessing the effect of pasta intake on health parameters  
373 including body weight. Our findings, however, agree with earlier systematic reviews and meta-  
374 analyses of RCTs of the effect of low-GI dietary patterns irrespective of pasta intake on body  
375 weight and adiposity. The systematic review and meta-analysis by Thomas et al. in 2007 found a  
376 significant -1.1kg weight loss and -1.3kg/m<sup>2</sup> reduction in BMI favouring low-GI or glyceic  
377 load (GL) diets compared to control diets in 6 RCTs of 5 weeks to 6 months in duration in  
378 overweight or obese individuals<sup>13</sup>. Another systematic review and meta-analysis by  
379 Schwingshackl et al. in 2013 found a -0.62kg weight loss favouring low-GI/GL diets compared  
380 to higher GI/GL diets in 14 RCTs with greater than 6 months duration in overweight individuals  
381 (BMI>25kg/m<sup>2</sup>)<sup>14</sup>.

382  
383 Our findings also agree with trials in which pasta was emphasized in the context of other healthy  
384 dietary patterns. One trial done in children in Spain given Mediterranean dietary advice which  
385 included increasing the intake of pasta found that approximately 11.3% of the participants in the  
386 Mediterranean diet group who were classified as overweight and obese changed their weight  
387 status to normal weight compared to only approximately 2.6% of the participants in the control  
388 group<sup>55</sup>.

389  
390 Other lines of evidence from observational studies have demonstrated benefits of pasta  
391 consumption on body weight and adiposity. Pasta intake was recently assessed in the Moli-sani  
392 study and the Italian Nutrition & HEalth Survey (INHES), a cross-sectional study of over  
393 20,000 Italians from all over Italy<sup>56</sup>. The study demonstrated that higher pasta consumption was

1  
2  
3 394 associated with lower BMI, waist circumference and waist-to-hip ratio and with a lower  
4  
5 395 prevalence of overweight and obesity<sup>56</sup>. Furthermore, greater pasta intake was associated with  
6  
7 396 better adherence to the Mediterranean diet, a dietary pattern which has a demonstrated  
8  
9  
10 397 cardiovascular benefit<sup>57</sup>. Similar associations between greater pasta intake and lower body  
11  
12 398 weight have also been observed in prospective U.S. cohorts<sup>58</sup>. A pooled analysis of the 3  
13  
14 399 Harvard cohorts also showed that higher GI diets (which would preclude pasta) were associated  
15  
16  
17 400 with weight gain<sup>59</sup>.

18  
19 401  
20  
21 402 Although the product form of pasta can vary widely, including in shape (e.g. macaroni, spaghetti,  
22  
23 403 linguine), ingredients (e.g. type of wheat, egg content), and processing technique (e.g. drying  
24  
25 404 temperature), studies have demonstrated that when comparing pastas varying in these  
26  
27  
28 405 parameters, despite slight variations in glycemic response among pastas, glycemic responses are  
29  
30 406 still lower compared to a control, e.g. white bread<sup>60,61</sup>. One concern of the choice of pasta as a  
31  
32 407 carbohydrate food is that it is a refined food low in fibre. Although there are whole grain pasta  
33  
34 408 options available, studies have demonstrated that fiber added to pasta, does not significantly  
35  
36  
37 409 affect the glucose or insulin response, the secretion of gut hormones or satiety<sup>62,63</sup>. Furthermore,  
38  
39 410 pasta has a similar glycemic response compared to many fiber-rich carbohydrates, including  
40  
41 411 barley, legumes and steel cut oats, and still a lower glycemic response compared to other fiber-  
42  
43 412 rich foods including whole wheat bread, breakfast cereals like bran flakes and potatoes with  
44  
45 413 skin<sup>64</sup>. The typically consumed white wheat pasta also has a higher micronutrient content  
46  
47  
48 414 compared to other white wheat products like bread since it contains the aleurone layer which is  
49  
50 415 preserved as a result of the use of harder wheats (durum wheat); even when durum wheats are  
51  
52  
53 416 used in breads, pasta retains a lower glycemic response primarily because of the processing  
54  
55  
56  
57  
58  
59  
60

1  
2  
3 417 techniques used in pasta making which give pasta a compact structure and reduced starch  
4  
5 418 hydrolysis<sup>61</sup>.

6  
7  
8 419  
9  
10 420 The mechanism by which pasta in the context of low-GI dietary patterns lead to weight loss even  
11  
12 421 under conditions of ad libitum dietary advice is unclear. Lower GI diets may result in greater  
13  
14 422 body weight reduction compared to higher GI diets because lower GI foods may be more  
15  
16 423 satiating<sup>65</sup> and have been shown to delay hunger and decrease subsequent energy intake<sup>13</sup>. Low-  
17  
18 424 GI dietary patterns are also characterized by high fiber content<sup>64,66</sup> which may also contribute to  
19  
20 425 improvements in satiety and hunger<sup>17</sup>. Furthermore, studies which have compared ad libitum  
21  
22 426 low-GI dietary patterns to standard energy-restricted low-fat diets, demonstrated equivalency or  
23  
24 427 better weight loss when following the low-GI diet, despite the fact that they could eat as much as  
25  
26 428 they desired<sup>13,67</sup>. Thus, voluntary energy intake may be lower after low-GI meals, as has been  
27  
28 429 previously demonstrated<sup>68</sup>.

30  
31  
32  
33 430

### 34 35 431 **Strengths and limitations**

36  
37 432 The strengths of the present systematic review and meta-analysis include that it is  
38  
39 433 comprehensive, includes RCTs which protects against bias and uses GRADE to evaluate the  
40  
41 434 quality of evidence. Additionally, a large number of trials were identified (32 trials) for the  
42  
43 435 primary outcome of body weight, the median follow-up period was 12 weeks which allows for  
44  
45 436 the assessment of a moderate duration of intervention, none of the trials were rated as having a  
46  
47 437 serious risk of bias, and there was no evidence of publication bias.

48  
49  
50  
51 438  
52  
53  
54  
55  
56  
57  
58  
59  
60

1  
2  
3 439 There are several limitations. First, we downgraded the certainty of the evidence for serious  
4  
5 440 inconsistency in the treatment estimates across trials for some of the outcomes assessed. There  
6  
7 441 was evidence of unexplained heterogeneity in waist circumference ( $I^2=62\%$ ) and in body fat  
8  
9 442 ( $I^2=65\%$ ). Although the inconsistency in these outcomes may have related to measurement  
10  
11 443 error<sup>69</sup> in the different techniques for measuring waist circumference and body fat, we were  
12  
13 444 unable to conduct sensitivity or subgroup analyses to explore this source of heterogeneity.  
14  
15 445 Second, we downgraded the certainty of the evidence for serious indirectness. Most of the  
16  
17 446 available trials did not quantify the amount of pasta consumed in the context of the low-GI  
18  
19 447 dietary patterns. Although sensitivity analyses in which analyses were restricted to the 11 trials  
20  
21 448 that did quantify (providing a median 3.33 servings/week) pasta intake did not meaningfully alter  
22  
23 449 our estimates (-0.70kg versus -0.63kg), it is difficult to quantify the effect of pasta in these diets.  
24  
25 450 There is also the question of indirectness in the translation to other background diets. None of the  
26  
27 451 available trials evaluated the effect of pasta alone or in the context of other dietary patterns.  
28  
29 452 Whether the observed effect of pasta in the context of low-GI dietary patterns will hold in the  
30  
31 453 context of other healthy dietary patterns, such as Mediterranean and Vegetarian dietary patterns,  
32  
33 454 is unclear. Although there is no biological reason to doubt that the findings would hold across  
34  
35 455 different dietary patterns, there was no direct evidence to support this conclusion. If the question  
36  
37 456 had been asked from the perspective of benefit as opposed to that of harm, then the relatively  
38  
39 457 short duration of the included trials is another reason to downgrade for serious indirectness. In  
40  
41 458 the absence of long-term trials (>1 year diet duration), it is difficult to conclude with certainty  
42  
43 459 that the observed lack of harm implies an actual sustainable benefit. Finally, there was some  
44  
45 460 evidence of imprecision for benefit. Whereas the 95% CI of the pooled estimates did not overlap  
46  
47 461 with our pre-specified MID for harm (that is, they did not contain evidence for harm) and so  
48  
49  
50  
51  
52  
53  
54  
55  
56  
57  
58  
59  
60

1  
2  
3 462 were not downgraded for imprecision, the upper bound of the 95% CI did overlap with the lower  
4  
5 463 bound of the same MID to assess the precision of the evidence for benefit for some outcomes.  
6  
7  
8 464

9  
10 465 Balancing these strengths and limitations, GRADE assessed the overall quality and strength of  
11  
12 466 the available evidence of the effect of pasta in the context of low-GI dietary patterns as moderate  
13  
14 467 for the primary outcome of body weight and the secondary outcomes of BMI, waist-to-hip ratio  
15  
16 468 and sagittal abdominal diameter owing to downgrades for indirectness. The evidence was  
17  
18  
19 469 assessed as low for the other secondary outcomes of body fat and waist circumference owing to  
20  
21 470 downgrades for indirectness and inconsistency.  
22  
23  
24 471

## 25 26 472 **Implications**

27  
28 473 These results are important considering the negative messages directed at the public regarding  
29  
30 474 carbohydrates, which is influencing their food choices, as is evident in recent reductions in  
31  
32 475 carbohydrate intake<sup>70-72</sup>, and in particular reductions in pasta consumption<sup>70,73-76</sup>. Contrary to  
33  
34 476 these concerns, the available evidence shows that when pasta is consumed in the context of low-  
35  
36 477 GI dietary patterns that there is not weight gain but rather marginally clinically significant weight  
37  
38 478 loss (>0.5kg)<sup>77</sup>.  
39  
40  
41  
42 479

43  
44 480 Although we were able to approximate the amount of pasta consumed in one third of included  
45  
46 481 trials, it is unclear what the effect of pasta would be in the context of other dietary patterns. Low-  
47  
48 482 GI dietary patterns, however, shares many similarities with a Mediterranean diet, which  
49  
50 483 emphasizes many low-GI foods and has demonstrated a CVD benefit<sup>57</sup>.  
51  
52  
53  
54 484



1  
2  
3 485 Current clinical practice guidelines already suggest the replacement of high GI foods with low-  
4  
5 486 GI foods for improvement of glycemic control and cardiovascular risk factors<sup>78,79</sup>. The present  
6  
7 487 evidence means that pasta may be highlighted as an important example of a low-GI food which  
8  
9 488 can contribute to a low-GI dietary pattern, a pattern which in turn may potentially improve  
10  
11 489 cardio-metabolic risk without an adverse effect on weight control.  
12  
13  
14  
15  
16

## 17 491 CONCLUSIONS

18  
19 492 In conclusion, the available evidence from RCTs does not allow us to conclude that pasta  
20  
21 493 consumed in the context of low-GI dietary patterns has an adverse effect on body weight and  
22  
23 494 adiposity outcomes of importance in the prevention and management of overweight and obesity.  
24  
25 495 On the contrary, pasta in the context of low-GI dietary patterns reduces body weight and BMI  
26  
27 496 compared with higher-GI dietary patterns. The results are generalizable in the context of a high  
28  
29 497 carbohydrate dietary pattern composed of low-GI foods with or without the intention of weight  
30  
31 498 loss in middle-aged individuals who are overweight or obese or have diabetes. Although the  
32  
33 499 clinical significance of the observed weight loss is debatable, this finding increases our  
34  
35 500 confidence that pasta in the context of low-GI dietary patterns does not result in weight gain.  
36  
37 501 Further research may change our confidence in the estimates for our primary outcome body  
38  
39 502 weight and several key secondary outcomes including BMI and two measures of abdominal  
40  
41 503 adiposity, waist-to-hip ratio and sagittal abdominal diameter. More research is needed, to  
42  
43 504 improve our estimates for the secondary outcomes, body fat and waist circumference and assess  
44  
45 505 whether our findings extend to related cardio-metabolic outcomes. There is also a need for more  
46  
47 506 randomized trials of >1 year diet duration to clarify whether the lack of harm for pasta in the  
48  
49 507 context of low-GI dietary patterns will translate into meaningful long-term benefits. Other  
50  
51  
52  
53  
54  
55  
56  
57  
58  
59  
60

1  
2  
3 508 randomized trials should focus on whether pasta will have similar effects in the context of other  
4  
5 509 healthy dietary patterns such as a Mediterranean diet.  
6  
7

8 510

9  
10 511  
11  
12  
13  
14  
15  
16  
17  
18  
19  
20  
21  
22  
23  
24  
25  
26  
27  
28  
29  
30  
31  
32  
33  
34  
35  
36  
37  
38  
39  
40  
41  
42  
43  
44  
45  
46  
47  
48  
49  
50  
51  
52  
53  
54  
55  
56  
57  
58  
59  
60

For peer review only

1  
2  
3 512 **Figure Legend**  
4

5 513 **Figure 1:** Literature Search  
6

7 514 **Figure 2:** Forest plot of randomized controlled trials investigating the effects of pasta in the  
8 context of low-GI dietary patterns on body weight (kg). n = 2448. Data are expressed as mean  
9 differences represented by a square and 95% CIs by the line through the square. 95% CIs  
10 516 exceeding the plot's bounds are represented by an arrowhead. Pooled effect estimates are  
11 517 represented by diamonds and were estimated with the use of generic inverse variance random  
12 518 effects models. Between-study heterogeneity was detected with the use of the Cochran's Q  
13 519 statistic at a significance level of  $P < 0.10$  and quantified with the use of the  $I^2$  statistic where  
14 520  $I^2 \geq 50\%$  is considered to be evidence of substantial heterogeneity and  $\geq 75\%$  considerable  
15 521 heterogeneity.  
16 522

17 523 CHD, coronary heart disease; CHO, carbohydrate; CI, confidence interval; HGI, higher glycemic  
18 524 index diet; GI, glycemic index; LGI, low glycemic index diet; MUFA, monounsaturated fatty  
19 525 acids; Pro, protein.  
20 526  
21  
22

23 527 **Figure 3:** Plot of pooled effect estimates from randomized controlled trials investigating the  
24 528 effects of pasta in the context of low-GI dietary patterns on global and abdominal markers of  
25 529 adiposity. Pooled effect estimates are represented by diamonds and were estimated with the use  
26 530 of generic inverse variance random effects models. Between-study heterogeneity was detected  
27 531 with the use of the Cochran's Q statistic at a significance level of  $P < 0.10$  and quantified with the  
28 532 use of the  $I^2$  statistic where  $I^2 \geq 50\%$  is considered to be evidence of substantial heterogeneity and  
29 533  $\geq 75\%$  considerable heterogeneity.

30 534 BMI; body mass index; CI, confidence interval; HGI, higher glycemic index diet; GI, glycemic  
31 535 index; LGI, low glycemic index diet.  
32  
33  
34  
35

36 537  
37  
38  
39  
40  
41  
42  
43  
44  
45  
46  
47  
48  
49  
50  
51  
52  
53  
54  
55  
56  
57  
58  
59  
60

1  
2  
3 **538 Acknowledgements**  
4

5 539 We wish to thank Teruko Kishibe, an information specialist in the Scotiabank Health Sciences  
6  
7 540 Library, St Michael's Hospital, for her help in the development of search terms used. Aspects of  
8  
9  
10 541 this work were presented at the Società Italiana di Nutrizione Umana (SINU) Congress, in  
11  
12 542 Parma, Italy, on April 12, 2017 and at the 35th International Symposium on Diabetes and  
13  
14 543 Nutrition, of the Diabetes and Nutrition Study Group (DNSG) of the European Association for  
15  
16 544 the Study of Diabetes (EASD) in Skagen, Denmark, on June 20 and 21, 2017.  
17  
18  
19

20 **545 Data Sharing**  
21  
22

23 546 No additional data available.  
24  
25  
26 547  
27

28 **548 Exclusive License**  
29  
30

31 549 The Corresponding Author has the right to grant on behalf of all authors and does grant on behalf  
32  
33 550 of all authors, an exclusive license (or non-exclusive for government employees) on a worldwide  
34  
35 551 basis to the BMJ Publishing Group Ltd to permit this article (if accepted) to be published in BMJ  
36  
37 552 editions and any other BMJ PGL products and sublicenses such use and exploit all subsidiary  
38  
39 553 rights, as set out in our license.  
40  
41  
42  
43

44 **554 Ethics Approval**  
45  
46

47 555 Not required.  
48  
49

50 **556 Authorship:**  
51

52 557 All authors had full access to all of the data (including statistical reports and tables) in this study  
53  
54 558 and take full responsibility for the integrity of the data and the accuracy of the data analysis.  
55  
56  
57  
58  
59  
60

1  
2  
3 559 **Conception and design:** C.W.C. Kendall, J.L. Sievenpiper.  
4  
5

6 560 **Analysis and interpretation of the data:** L. Chiavaroli, C.W.C. Kendall, C.R. Braunstein, S.  
7

8 561 Blanco Mejia, L.A. Leiter, D.J.A. Jenkins, J.L. Sievenpiper.  
9  
10

11 562 **Drafting of the article:** L. Chiavaroli, J.L. Sievenpiper.  
12  
13

14 563 **Critical revision of the article for important intellectual content:** L. Chiavaroli, C.W.C.  
15

16 Kendall, C.R. Braunstein, S. Blanco Mejia, L.A. Leiter, D.J.A. Jenkins, J.L. Sievenpiper.  
17  
18

19 565 **Final approval of the article:** L. Chiavaroli, C.W.C. Kendall, C.R. Braunstein, S. Blanco Mejia,  
20

21 L.A. Leiter, D.J.A. Jenkins, J.L. Sievenpiper.  
22  
23

24 567 **Obtaining of funding:** C.W.C. Kendall, D.J.A. Jenkins, J.L. Sievenpiper.  
25  
26

27 568 **Administrative, technical, or logistic support:** S. Blanco Mejia.  
28  
29

30 569 **Collection and assembly of data:** L. Chiavaroli, C.R. Braunstein, S. Blanco Mejia.  
31  
32

33 570 **Guarantor:** J.L. Sievenpiper.  
34  
35

36 571 **Transparency declaration:** As guarantor, J.L. Sievenpiper affirms that the manuscript is an  
37

38 572 honest, accurate, and transparent account of the study being reported; that no important aspects  
39

40 573 of the study have been omitted; and that any discrepancies from the study as planned (and, if  
41

42 574 relevant, registered) have been explained.  
43  
44

45 575 **Funding:**  
46  
47

48 576 This work was funded by the Canadian Institutes of Health Research (funding reference  
49

50 577 number, 129920) through the Canada-wide Human Nutrition Trialists' Network (NTN). The  
51

52 578 Diet, Digestive tract, and Disease (3-D) Centre, funded through the Canada Foundation for  
53

54 579 Innovation (CFI) and the Ministry of Research and Innovation's Ontario Research Fund (ORF),  
55  
56  
57  
58  
59  
60

1  
2  
3 580 provided the infrastructure for the conduct of this project. **L Chiavaroli** was funded by a Toronto  
4  
5 581 3D Postdoctoral Fellowship Award. **DJA Jenkins** was funded by the Government of Canada  
6  
7 582 through the Canada Research Chair Endowment. **JL Sievenpiper** was funded by a PSI Graham  
8  
9 583 Farquharson Knowledge Translation Fellowship, Canadian Diabetes Association (CDA)  
10  
11 584 Clinician Scientist award, CIHR INMD/CNS New Investigator Partnership Prize, and Banting &  
12  
13 585 Best Diabetes Centre Sun Life Financial New Investigator Award. None of the sponsors had a  
14  
15 586 role in any aspect of the present study, including design and conduct of the study; collection,  
16  
17 587 management, analysis, and interpretation of the data; and preparation, review, approval of the  
18  
19 588 manuscript or decision to publish.  
20  
21  
22  
23

24 589

25  
26 590 **Conflicts of Interest:**

27  
28 591 All authors have completed the Unified Competing Interest form (available on request from the  
29  
30 592 corresponding author) and declare: **CWC Kendall** has received research support from the  
31  
32 593 Advanced Foods and Material Network, Agrifoods and Agriculture Canada, the Almond Board  
33  
34 594 of California, the American Pistachio Growers, Barilla, the California Strawberry Commission,  
35  
36 595 the Calorie Control Council, CIHR, the Canola Council of Canada, the Coca-Cola Company  
37  
38 596 (investigator initiated, unrestricted grant), Hain Celestial, the International Tree Nut Council  
39  
40 597 Nutrition Research and Education Foundation, Kellogg, Kraft, Loblaw Companies Ltd., Orafiti,  
41  
42 598 Pulse Canada, Saskatchewan Pulse Growers, Solae and Unilever. He has received travel funding,  
43  
44 599 consultant fees and/or honoraria from Abbott Laboratories, the Almond Board of California, the  
45  
46 600 American Peanut Council, the American Pistachio Growers, Barilla, Bayer, the Canola Council  
47  
48 601 of Canada, the Coca-Cola Company, Danone, General Mills, the International Tree Nut Council  
49  
50 602 Nutrition Research and Education Foundation, Kellogg, Loblaw Companies Ltd., the Nutrition  
51  
52 603 Foundation of Italy, Oldways Preservation Trust, Orafiti, Paramount Farms, the Peanut Institute,  
53  
54  
55  
56  
57  
58  
59  
60

1  
2  
3 604 PepsiCo, Pulse Canada, Sabra Dipping Co., Saskatchewan Pulse Growers, Solae, Sun-Maid, Tate  
4  
5 605 and Lyle, and Unilever. He is on the Clinical Practice Guidelines Expert Committee for Nutrition  
6  
7 606 Therapy of the European Association for the Study of Diabetes (EASD) and has served on the  
8  
9  
10 607 scientific advisory board for the Almond Board of California, the International Tree Nut Council,  
11  
12 608 Oldways Preservation Trust, Paramount Farms and Pulse Canada. **DJAJ** has received research  
13  
14 609 grants from Saskatchewan Pulse Growers, the Agricultural Bioproducts Innovation Program  
15  
16 610 through the Pulse Research Network, the Advanced Foods and Material Network, Loblaw  
17  
18 611 Companies Ltd., Unilever, Barilla, the Almond Board of California, Agriculture and Agri-food  
19  
20 612 Canada, Pulse Canada, Kellogg's Company, Canada, Quaker Oats, Canada, Procter & Gamble  
21  
22 613 Technical Centre Ltd., Bayer Consumer Care, Springfield, NJ, Pepsi/Quaker, International Nut  
23  
24 614 & Dried Fruit (INC), Soy Foods Association of North America, the Coca-Cola Company  
25  
26 615 (investigator initiated, unrestricted grant), Solae, Haine Celestial, the Sanitarium Company,  
27  
28 616 Orafiti, the International Tree Nut Council Nutrition Research and Education Foundation, the  
29  
30  
31 617 Peanut Institute, the Canola and Flax Councils of Canada, the Calorie Control Council (CCC),  
32  
33 618 the CIHR, the Canada Foundation for Innovation and the Ontario Research Fund. He has  
34  
35 619 received in-kind supplies for trial as a research support from the Almond board of California,  
36  
37 620 Walnut Council of California, American Peanut Council, Barilla, Unilever, Unico, Primo,  
38  
39 621 Loblaw Companies, Quaker (Pepsico), Pristine Gourmet, Bunge Limited, Kellogg Canada,  
40  
41 622 WhiteWave Foods. He has been on the speaker's panel, served on the scientific advisory board  
42  
43 623 and/or received travel support and/or honoraria from the Almond Board of California, Canadian  
44  
45 624 Agriculture Policy Institute, Loblaw Companies Ltd, the Griffin Hospital (for the development of  
46  
47 625 the NuVal scoring system, the Coca-Cola Company, EPICURE, Danone, Diet Quality Photo  
48  
49 626 Navigation (DQPN), FareWell, Verywell, True Health Initiative, Saskatchewan Pulse Growers,  
50  
51  
52  
53  
54  
55  
56  
57  
58  
59  
60

1  
2  
3 627 Sanitarium Company, Orafti, the Almond Board of California, the American Peanut Council, the  
4  
5 628 International Tree Nut Council Nutrition Research and Education Foundation, the Peanut  
6  
7 629 Institute, Herbalife International, Pacific Health Laboratories, Nutritional Fundamental for  
8  
9  
10 630 Health, Barilla, Metagenics, Bayer Consumer Care, Unilever Canada and Netherlands, Solae,  
11  
12 631 Kellogg, Quaker Oats, Procter & Gamble, the Coca-Cola Company, the Griffin Hospital, Abbott  
13  
14 632 Laboratories, the Canola Council of Canada, Dean Foods, the California Strawberry  
15  
16 633 Commission, Haine Celestial, PepsiCo, the Alpro Foundation, Pioneer Hi-Bred International,  
17  
18 634 DuPont Nutrition and Health, Spherix Consulting and WhiteWave Foods, the Advanced Foods  
19  
20 635 and Material Network, the Canola and Flax Councils of Canada, the Nutritional Fundamentals  
21  
22 636 for Health, Agri-Culture and Agri-Food Canada, the Canadian Agri-Food Policy Institute, Pulse  
23  
24 637 Canada, the Saskatchewan Pulse Growers, the Soy Foods Association of North America, the  
25  
26 638 Nutrition Foundation of Italy (NFI), Nutra-Source Diagnostics, the McDougall Program, the  
27  
28 639 Toronto Knowledge Translation Group (St. Michael's Hospital), the Canadian College of  
29  
30 640 Naturopathic Medicine, The Hospital for Sick Children, the Canadian Nutrition Society (CNS),  
31  
32 641 the American Society of Nutrition (ASN), Arizona State University, Paolo Sorbini Foundation  
33  
34 642 and the Institute of Nutrition, Metabolism and Diabetes. He received an honorarium from the  
35  
36 643 United States Department of Agriculture to present the 2013 W.O. Atwater Memorial Lecture.  
37  
38 644 He received the 2013 Award for Excellence in Research from the International Nut and Dried  
39  
40 645 Fruit Council. He received funding and travel support from the Canadian Society of  
41  
42 646 Endocrinology and Metabolism to produce mini cases for the Canadian Diabetes Association  
43  
44 647 (CDA). He is a member of the International Carbohydrate Quality Consortium (ICQC). His wife,  
45  
46 648 ALJ, is a director and partner of Glycemic Index Laboratories, Inc., and his sister received  
47  
48 649 funding through a grant from the St. Michael's Hospital Foundation to develop a cookbook for  
49  
50  
51  
52  
53  
54  
55  
56  
57  
58  
59  
60



1  
2  
3 650 one of his studies. **JL Sievenpiper** has received research support from the Canadian Institutes of  
4  
5 651 health Research (CIHR), Canadian Diabetes Association (CDA), PSI Foundation, Banting and  
6  
7 652 Best Diabetes Centre (BBDC), Canadian Nutrition Society (CNS), American Society for  
8  
9 653 Nutrition (ASN), Calorie Control Council, INC International Nut and Dried Fruit Council  
10  
11 654 Foundation, National Dried Fruit Trade Association, The Coca-Cola Company (investigator  
12  
13 655 initiated, unrestricted), Dr. Pepper Snapple Group (investigator initiated, unrestricted), The Tate  
14  
15 656 and Lyle Nutritional Research Fund at the University of Toronto, and The Alberta Pulse Growers  
16  
17 657 Glycemic Control and Cardiovascular Disease in Type 2 Diabetes Fund at the University of  
18  
19 658 Toronto. He has received in-kind research support from the Almond board of California, Walnut  
20  
21 659 Council of California, American Peanut Council, Barilla, Unilever, Unico, Primo, Loblaw  
22  
23 660 Companies, Quaker (Pepsico), Pristine Gourmet, Bunge Limited, Kellogg Canada, WhiteWave  
24  
25 661 Foods. He has received reimbursement of travel expenses, speaker fees, and/or honoraria from  
26  
27 662 the Canadian Diabetes Association (CDA), Canadian Nutrition Society (CNS), University of  
28  
29 663 Alabama at Birmingham, Oldways Preservation Trust, Nutrition Foundation of Italy (NFI),  
30  
31 664 Diabetes and Nutrition Study Group (DNSG) of the European Association for the Study of  
32  
33 665 Diabetes (EASD), International Life Sciences Institute (ILSI) North America, Dr. Pepper  
34  
35 666 Snapple Group, Corn Refiners Association, World Sugar Research Organization, Dairy Farmers  
36  
37 667 of Canada, Società Italiana di Nutrizione Umana (SINU), III World Congress of Public Health  
38  
39 668 Nutrition, C3 Collaborating for Health, Sprim Brasil, WhiteWave Foods, Rippe Lifestyle,  
40  
41 669 mdBriefcase, Federation of European Nutrition Societies (FENS), New York Academy of  
42  
43 670 Sciences, International Diabetes Federation, American Heart Association (AHA), American  
44  
45 671 Society for Nutrition (ASN), FoodMinds LLC, Memac Ogilvy & Mather LLC, Pulse Canada,  
46  
47 672 Pepsico, BCFN Foundation, The Ginger Network LLC, and Dietitians of Canada. He has ad hoc  
48  
49  
50  
51  
52  
53  
54  
55  
56  
57  
58  
59  
60

1  
2  
3 673 consulting arrangements with Winston & Strawn LLP, Perkins Coie LLP, and Tate & Lyle. He is  
4  
5 674 a member of the European Fruit Juice Association Scientific Expert Panel. He is on Clinical  
6  
7 675 Practice Guidelines Expert Committees of the Canadian Diabetes Association (CDA) European  
8  
9 676 Association for the study of Diabetes (EASD), and Canadian Cardiovascular Society (CCS), as  
10  
11 677 well as an expert writing panel of the American Society for Nutrition (ASN). He serves as an  
12  
13 678 unpaid scientific advisor for the Food, Nutrition, and Safety Program (FNSP) and the Technical  
14  
15 679 Committee on Carbohydrates of the International Life Science Institute (ILSI) North America.  
16  
17 680 He is a member of the International Carbohydrate Quality Consortium (ICQC), Executive Board  
18  
19 681 Member of the Diabetes and Nutrition Study Group (DNSG) of the EASD, and Director of the  
20  
21 682 Toronto 3D Knowledge Synthesis and Clinical Trials foundation. His wife is an employee of  
22  
23 683 Unilever Canada. No competing interests were declared by **CR Braunstein, S Blanco Mejia,**  
24  
25  
26  
27  
28 684 **and LA Leiter.**  
29  
30  
31  
32  
33  
34  
35  
36  
37  
38  
39  
40  
41  
42  
43  
44  
45  
46  
47  
48  
49  
50  
51  
52  
53  
54  
55  
56  
57  
58  
59  
60

698 **References**

- 699 1. Malhotra A. Eating MORE fat while cutting carbs and quitting sugar can help you lose weight and  
700 be happier, says top cardiologist. Mail Online 2016.
- 701 2. Taubes G. Diet Advice That Ignores Hunger. The New York Times. Sunday Review ed 2015.
- 702 3. Ludwig D. Always hungry? Conquer cravings, retrain your fat cells and lose weight permanently.  
703 New York: Grand Central Life & Style; 2016.
- 704 4. Taubes G. Why We Get Fat And What To Do About It. . New York: Alfred A Knopf; 2011.
- 705 5. Atkins R. Dr Atkins' Diet Revolution: The High Calorie Way to Stay Thin Forever. : Bantam Books;  
706 1973.
- 707 6. Perlmutter D. Grain Brain: The surprising truth about wheat, carbs, and sugar -- Your brain's  
708 silent killers: Little, Brown And Company; 2013.
- 709 7. David W. Wheat Belly: HarperCollins; 2012.
- 710 8. Cordain L. The Paleo Diet Revised: Lose weight and get healthy by eating the foods you were  
711 designed to eat: Houghton Mifflin Harcourt; 2010.
- 712 9. Teicholz N. The Big Fat Surprise: Why Butter, Meat and Cheese Belong in a Healthy Diet: Simon  
713 and Schuster; 2014.
- 714 10. National Obesity Forum, The Public Health Collaboration. Eat Fat, Cut The Carbs and Avoid  
715 Snacking To Reverse Obesity and Type 2 Diabetes.
- 716 11. Malhotra A. Saturated fat is not the major issue. BMJ 2013;347:f6340.
- 717 12. Malhotra A. Author's reply to Lichtenstein, Tedstone and Pyne, Mann and colleagues, Lim, and  
718 Clifton. BMJ 2013;347:f6855.
- 719 13. Thomas DE, Elliott EJ, Baur L. Low glycaemic index or low glycaemic load diets for overweight  
720 and obesity. Cochrane Database Syst Rev 2007:CD005105.
- 721 14. Schwingshackl L, Hoffmann G. Long-term effects of low glycemic index/load vs. high glycemic  
722 index/load diets on parameters of obesity and obesity-associated risks: a systematic review and meta-  
723 analysis. Nutr Metab Cardiovasc Dis 2013;23:699-706.
- 724 15. Pol K, Christensen R, Bartels EM, Raben A, Tetens I, Kristensen M. Whole grain and body weight  
725 changes in apparently healthy adults: a systematic review and meta-analysis of randomized controlled  
726 studies. Am J Clin Nutr 2013;98:872-84.
- 727 16. Harland JI, Garton LE. Whole-grain intake as a marker of healthy body weight and adiposity.  
728 Public Health Nutr 2008;11:554-63.
- 729 17. Slavin JL. Dietary fiber and body weight. Nutrition 2005;21:411-8.
- 730 18. Dahl WJ, Stewart ML. Position of the Academy of Nutrition and Dietetics: Health Implications of  
731 Dietary Fiber. J Acad Nutr Diet 2015;115:1861-70.
- 732 19. Higgins JP, Green S, eds. Cochrane Handbook for Systematic Reviews of Interventions [Internet].  
733 Version 5.1.0. The Cochrane Collaboration. Version current March 2011 [cited 2015 Sep 23]. Available  
734 from: [www.cochrane-handbook.org](http://www.cochrane-handbook.org).
- 735 20. Moher D, Liberati A, Tetzlaff J, Altman DG, Group P. Preferred reporting items for systematic  
736 reviews and meta-analyses: the PRISMA statement. Ann Intern Med 2009;151:264-9, W64.
- 737 21. Elbourne DR, Altman DG, Higgins JP, Curtin F, Worthington HV, Vail A. Meta-analyses involving  
738 cross-over trials: methodological issues. Int J Epidemiol 2002;31:140-9.
- 739 22. Egger M, Davey Smith G, Schneider M, Minder C. Bias in meta-analysis detected by a simple,  
740 graphical test. BMJ 1997;315:629-34.
- 741 23. Begg CB. A measure to aid in the interpretation of published clinical trials. Stat Med 1985;4:1-9.
- 742 24. Duval S, Tweedie R. Trim and fill: A simple funnel-plot-based method of testing and adjusting for  
743 publication bias in meta-analysis. Biometrics 2000;56:455-63.

- 1  
2  
3 744 25. Guyatt G, Oxman AD, Akl EA, et al. GRADE guidelines: 1. Introduction-GRADE evidence profiles  
4 745 and summary of findings tables. *J Clin Epidemiol* 2011;64:383-94.
- 5 746 26. Jebb SA, Lovegrove JA, Griffin BA, et al. Effect of changing the amount and type of fat and  
6 747 carbohydrate on insulin sensitivity and cardiovascular risk: the RISCK (Reading, Imperial, Surrey,  
7 748 Cambridge, and Kings) trial. *Am J Clin Nutr* 2010;92:748-58.
- 8 749 27. Philippou E, Bovill-Taylor C, Rajkumar C, et al. Preliminary report: the effect of a 6-month dietary  
9 750 glycemic index manipulation in addition to healthy eating advice and weight loss on arterial compliance  
10 751 and 24-hour ambulatory blood pressure in men: a pilot study. *Metabolism* 2009;58:1703-8.
- 11 752 28. Philippou E, McGowan BM, Brynes AE, Dornhorst A, Leeds AR, Frost GS. The effect of a 12-week  
12 753 low glycaemic index diet on heart disease risk factors and 24 h glycaemic response in healthy middle-  
13 754 aged volunteers at risk of heart disease: a pilot study. *Eur J Clin Nutr* 2008;62:145-9.
- 14 755 29. Sichieri R, Moura AS, Genelhu V, Hu F, Willett WC. An 18-mo randomized trial of a low-glycemic-  
15 756 index diet and weight change in Brazilian women. *Am J Clin Nutr* 2007;86:707-13.
- 16 757 30. Wolever TM, Mehling C. High-carbohydrate-low-glycaemic index dietary advice improves  
17 758 glucose disposition index in subjects with impaired glucose tolerance. *Br J Nutr* 2002;87:477-87.
- 18 759 31. Pereira EV, Costa Jde A, Alfenas Rde C. Effect of glycemic index on obesity control. *Arch*  
19 760 *Endocrinol Metab* 2015;59:245-51.
- 20 761 32. Karl JP, Roberts SB, Schaefer EJ, et al. Effects of carbohydrate quantity and glycemic index on  
21 762 resting metabolic rate and body composition during weight loss. *Obesity (Silver Spring)* 2015;23:2190-8.
- 22 763 33. Buscemi S, Cosentino L, Rosafio G, et al. Effects of hypocaloric diets with different glycemic  
23 764 indexes on endothelial function and glycemic variability in overweight and in obese adult patients at  
24 765 increased cardiovascular risk. *Clin Nutr* 2013;32:346-52.
- 25 766 34. Larsen TM, Dalskov SM, van Baak M, et al. Diets with high or low protein content and glycemic  
26 767 index for weight-loss maintenance. *N Engl J Med* 2010;363:2102-13.
- 27 768 35. Solomon TP, Haus JM, Kelly KR, et al. A low-glycemic index diet combined with exercise reduces  
28 769 insulin resistance, postprandial hyperinsulinemia, and glucose-dependent insulinotropic polypeptide  
29 770 responses in obese, prediabetic humans. *Am J Clin Nutr* 2010;92:1359-68.
- 30 771 36. Philippou E, Neary NM, Chaudhri O, et al. The effect of dietary glycemic index on weight  
31 772 maintenance in overweight subjects: a pilot study. *Obesity (Silver Spring)* 2009;17:396-401.
- 32 773 37. Abete I, Parra D, Martinez JA. Energy-restricted diets based on a distinct food selection affecting  
33 774 the glycemic index induce different weight loss and oxidative response. *Clin Nutr* 2008;27:545-51.
- 34 775 38. Aston LM, Stokes CS, Jebb SA. No effect of a diet with a reduced glycaemic index on satiety,  
35 776 energy intake and body weight in overweight and obese women. *Int J Obes (Lond)* 2008;32:160-5.
- 36 777 39. Jensen L, Sloth B, Krog-Mikkelsen I, et al. A low-glycemic-index diet reduces plasma plasminogen  
37 778 activator inhibitor-1 activity, but not tissue inhibitor of proteinases-1 or plasminogen activator inhibitor-  
38 779 1 protein, in overweight women. *Am J Clin Nutr* 2008;87:97-105.
- 39 780 40. Bellisle F, Dalix AM, De Assis MA, et al. Motivational effects of 12-week moderately restrictive  
40 781 diets with or without special attention to the Glycaemic Index of foods. *Br J Nutr* 2007;97:790-8.
- 41 782 41. de Rougemont A, Normand S, Nazare JA, et al. Beneficial effects of a 5-week low-glycaemic  
42 783 index regimen on weight control and cardiovascular risk factors in overweight non-diabetic subjects. *Br J*  
43 784 *Nutr* 2007;98:1288-98.
- 44 785 42. McMillan-Price J, Petocz P, Atkinson F, et al. Comparison of 4 diets of varying glycemic load on  
45 786 weight loss and cardiovascular risk reduction in overweight and obese young adults: a randomized  
46 787 controlled trial. *Arch Intern Med* 2006;166:1466-75.
- 47 788 43. Visek J, Lacigova S, Cechurova D, Rusavy Z. Comparison of a low-glycemic index vs standard  
48 789 diabetic diet. *Biomed Pap Med Fac Univ Palacky Olomouc Czech Repub* 2014;158:112-6.

- 1  
2  
3 790 44. Jenkins DJ, Kendall CW, Vuksan V, et al. Effect of lowering the glycemic load with canola oil on  
4 791 glycemic control and cardiovascular risk factors: a randomized controlled trial. *Diabetes Care*  
5 792 2014;37:1806-14.
- 6 793 45. Jenkins DJ, Kendall CW, Augustin LS, et al. Effect of legumes as part of a low glycemic index diet  
7 794 on glycemic control and cardiovascular risk factors in type 2 diabetes mellitus: a randomized controlled  
8 795 trial. *Arch Intern Med* 2012;172:1653-60.
- 9 796 46. Yusof BN, Talib RA, Kamaruddin NA, Karim NA, Chinna K, Gilbertson H. A low-GI diet is  
10 797 associated with a short-term improvement of glycaemic control in Asian patients with type 2 diabetes.  
11 798 *Diabetes Obes Metab* 2009;11:387-96.
- 12 799 47. Wolever TM, Gibbs AL, Mehling C, et al. The Canadian Trial of Carbohydrates in Diabetes (CCD),  
13 800 a 1-y controlled trial of low-glycemic-index dietary carbohydrate in type 2 diabetes: no effect on  
14 801 glycosylated hemoglobin but reduction in C-reactive protein. *Am J Clin Nutr* 2008;87:114-25.
- 15 802 48. Jenkins DJ, Kendall CW, McKeown-Eyssen G, et al. Effect of a low-glycemic index or a high-cereal  
16 803 fiber diet on type 2 diabetes: a randomized trial. *JAMA* 2008;300:2742-53.
- 17 804 49. Jimenez-Cruz A, Bacardi-Gascon M, Turnbull WH, Rosales-Garay P, Severino-Lugo I. A flexible,  
18 805 low-glycemic index mexican-style diet in overweight and obese subjects with type 2 diabetes improves  
19 806 metabolic parameters during a 6-week treatment period. *Diabetes Care* 2003;26:1967-70.
- 20 807 50. Heilbronn LK, Noakes M, Clifton PM. The effect of high- and low-glycemic index energy  
21 808 restricted diets on plasma lipid and glucose profiles in type 2 diabetic subjects with varying glycemic  
22 809 control. *J Am Coll Nutr* 2002;21:120-7.
- 23 810 51. Fontvieille AM, Acosta M, Rizkalla SW, et al. A moderate switch from high to low glycemic-index  
24 811 foods for 3 weeks improves metabolic control of type I (IDDM) diabetic subjects. . *Diabetes Nutr Metab*  
25 812 1988;1:139-43.
- 26 813 52. Frost GS, Brynes AE, Bovill-Taylor C, Dornhorst A. A prospective randomised trial to determine  
27 814 the efficacy of a low glycaemic index diet given in addition to healthy eating and weight loss advice in  
28 815 patients with coronary heart disease. *Eur J Clin Nutr* 2004;58:121-7.
- 29 816 53. de Assis Costa J, de Cassia Goncalves Alfensa R. The consumption of low glycemic meals reduces  
30 817 abdominal obesity in subjects with excess body weight. *Nutricio Hospitalaria* 2012;27:1178-83.
- 31 818 54. Fontvieille AM, Rizkalla SW, Penfornis A, Acosta M, Bornet FR, Slama G. The use of low  
32 819 glycaemic index foods improves metabolic control of diabetic patients over five weeks. *Diabet Med*  
33 820 1992;9:444-50.
- 34 821 55. Bibiloni MDM, Fernandez-Blanco J, Pujol-Plana N, et al. [Improving diet quality in children  
35 822 through a new nutritional education programme: INFADIMED]. *Gac Sanit* 2017.
- 36 823 56. Pounis G, Castelnuovo AD, Costanzo S, et al. Association of pasta consumption with body mass  
37 824 index and waist-to-hip ratio: results from Moli-sani and INHES studies. *Nutr Diabetes* 2016;6:e218.
- 38 825 57. Estruch R, Ros E, Salas-Salvado J, et al. Primary prevention of cardiovascular disease with a  
39 826 Mediterranean diet. *N Engl J Med* 2013;368:1279-90.
- 40 827 58. Shay CM, Van Horn L, Stamler J, et al. Food and nutrient intakes and their associations with  
41 828 lower BMI in middle-aged US adults: the International Study of Macro-/Micronutrients and Blood  
42 829 Pressure (INTERMAP). *Am J Clin Nutr* 2012;96:483-91.
- 43 830 59. Smith JD, Hou T, Ludwig DS, et al. Changes in intake of protein foods, carbohydrate amount and  
44 831 quality, and long-term weight change: results from 3 prospective cohorts. *Am J Clin Nutr* 2015;101:1216-  
45 832 24.
- 46 833 60. Granfeldt Y, Bjorck I. Glycemic response to starch in pasta: a study of mechanisms of limited  
47 834 enzyme availability. . *J Cereal Sci* 1991;14:47-61.
- 48 835 61. Granfeldt Y, Bjorck I, Hagander B. On the importance of processing conditions, product thickness  
49 836 and egg addition for the glycaemic and hormonal responses to pasta: a comparison with bread made  
50 837 from 'pasta ingredients'. *Eur J Clin Nutr* 1991;45:489-99.

- 1  
2  
3 838 62. Frost GS, Brynes AE, Dhillon WS, Bloom SR, McBurney MI. The effects of fiber enrichment of pasta  
4 839 and fat content on gastric emptying, GLP-1, glucose, and insulin responses to a meal. *Eur J Clin Nutr*  
5 840 2003;57:293-8.
- 6 841 63. Korczak R, Timm D, Ahnen R, Thomas W, Slavin JL. High Protein Pasta is Not More Satiating than  
7 842 High Fiber Pasta at a Lunch Meal, Nor Does it Decrease Mid-Afternoon Snacking in Healthy Men and  
8 843 Women. *J Food Sci* 2016;81:S2240-5.
- 9 844 64. Atkinson FS, Foster-Powell K, Brand-Miller JC. International tables of glycemic index and  
10 845 glycemic load values: 2008. *Diabetes Care* 2008;31:2281-3.
- 11 846 65. Ludwig DS. Dietary glycemic index and obesity. *J Nutr* 2000;130:280S-3S.
- 12 847 66. Riccardi G, Rivellese AA, Giacco R. Role of glycemic index and glycemic load in the healthy state,  
13 848 in prediabetes, and in diabetes. *Am J Clin Nutr* 2008;87:269S-74S.
- 14 849 67. Saris WH, Astrup A, Prentice AM, et al. Randomized controlled trial of changes in dietary  
15 850 carbohydrate/fat ratio and simple vs complex carbohydrates on body weight and blood lipids: the  
16 851 CARMEN study. The Carbohydrate Ratio Management in European National diets. *Int J Obes Relat*  
17 852 *Metab Disord* 2000;24:1310-8.
- 18 853 68. Ludwig DS, Majzoub JA, Al-Zahrani A, Dallal GE, Blanco I, Roberts SB. High glycemic index foods,  
19 854 overeating, and obesity. *Pediatrics* 1999;103:E26.
- 20 855 69. Wang J, Thornton JC, Bari S, et al. Comparisons of waist circumferences measured at 4 sites. *Am*  
21 856 *J Clin Nutr* 2003;77:379-84.
- 22 857 70. Makarem N, Scott M, Quatromoni P, Jacques P, Parekh N. Trends in dietary carbohydrate  
23 858 consumption from 1991 to 2008 in the Framingham Heart Study Offspring Cohort. *Br J Nutr*  
24 859 2014;111:2010-23.
- 25 860 71. Rehm CD, Penalvo JL, Afshin A, Mozaffarian D. Dietary Intake Among US Adults, 1999-2012.  
26 861 *JAMA* 2016;315:2542-53.
- 27 862 72. Golzarand M, Mirmiran P, Jessri M, Toolabi K, Mojarrad M, Azizi F. Dietary trends in the Middle  
28 863 East and North Africa: an ecological study (1961 to 2007). *Public Health Nutr* 2012;15:1835-44.
- 29 864 73. Leclercq C, Arcella D, Piccinelli R, et al. The Italian National Food Consumption Survey INRAN-  
30 865 SCAI 2005-06: main results in terms of food consumption. *Public Health Nutr* 2009;12:2504-32.
- 31 866 74. Bonaccio M, Di Castelnuovo A, Bonanni A, et al. Decline of the Mediterranean diet at a time of  
32 867 economic crisis. Results from the Moli-sani study. *Nutr Metab Cardiovasc Dis* 2014;24:853-60.
- 33 868 75. Sofi F, Innocenti G, Dini C, et al. Low adherence of a clinically healthy Italian population to  
34 869 nutritional recommendations for primary prevention of chronic diseases. *Nutr Metab Cardiovasc Dis*  
35 870 2006;16:436-44.
- 36 871 76. Ferdman RA. This is what happens when everyone is terrified of carbs. *The Washington Post*  
37 872 2015 September 2, 2015.
- 38 873 77. Johnston BC, Kanters S, Bandayrel K, et al. Comparison of weight loss among named diet  
39 874 programs in overweight and obese adults: a meta-analysis. *JAMA* 2014;312:923-33.
- 40 875 78. Stone NJ, Robinson JG, Lichtenstein AH, et al. 2013 ACC/AHA guideline on the treatment of  
41 876 blood cholesterol to reduce atherosclerotic cardiovascular risk in adults: a report of the American  
42 877 College of Cardiology/American Heart Association Task Force on Practice Guidelines. *Circulation*  
43 878 2014;129:S1-45.
- 44 879 79. Anderson TJ, Gregoire J, Hegele RA, et al. 2012 update of the Canadian Cardiovascular Society  
45 880 guidelines for the diagnosis and treatment of dyslipidemia for the prevention of cardiovascular disease  
46 881 in the adult. *The Canadian journal of cardiology* 2013;29:151-67.

882

883

884 **Table 1:** Summary of trial characteristics

| <b>Trial Characteristics*</b>                                  | <b>ALL</b>         | <b>Neutral Energy Balance</b> | <b>Negative Energy Balance</b> |
|----------------------------------------------------------------|--------------------|-------------------------------|--------------------------------|
| <b>Trial Number (n)</b>                                        | 32                 | 23                            | 9                              |
| <b>Trial Size (total, range)</b>                               | 2448 (8 - 250)     | 1989 (8 - 250)                | 459 (13 - 123)                 |
| <b>Male: Female<sup>a</sup> (%)</b>                            | 40:60              | 47:53                         | 27:73                          |
| <b>Age (years)</b>                                             | 50 (40 - 58)       | 52.0 (42.1 – 59.5)            | 49.5 (34.2 – 53.0)             |
| <b>Metabolic Phenotype (OW/OB:DM:CHD) (%)</b>                  | 66:31:3            | 57:39:4                       | 89:11:0                        |
| <b>Setting (IP:OP) (%)</b>                                     | 3:97               | 4:96                          | 0:100                          |
| <b>Baseline Body Weight (kg)<sup>b</sup></b>                   | 85.5 (80.0 - 91.9) | 84.1 (79.5 – 87.5)            | 92.5 (86.1 – 93.9)             |
| <b>Baseline BMI (kg/m<sup>2</sup>)<sup>c</sup></b>             | 30.4 (28.2 - 32.0) | 29.5 (27.4 – 31.4)            | 31.7 (30.1 – 32.9)             |
| <b>Study Design (C:P) (%)</b>                                  | 19:81              | 26:74                         | 0:100                          |
| <b>Dose Pasta (servings/week)<sup>d</sup></b>                  | 3.3 (2.3 - 3.5)    | 3.4 (2.9 – 4.1)               | 2.3 (2.3-3.5)                  |
| <b>GI in Pasta/LGI group</b>                                   | 49.0 (44.0 - 55.1) | 46.5 (49.9 – 55.5)            | 44.0 (42.3 - 49.4)             |
| <b>GI in Higher GI group</b>                                   | 62.5 (61.6 - 63.2) | 63.3 (60.1 – 64.4)            | 61.0 (59.2 – 66.6)             |
| <b>Calorie reduction in Pasta/LGI group (kcal)<sup>e</sup></b> | -179 (-90 - -448)  | -165 (-74 - -313)             | -447 (-134 - -594)             |
| <b>Calorie reduction in Higher GI group (kcal)<sup>e</sup></b> | -181 (-93 - -401)  | -160 (-40 - -248)             | -470 (-172 - -561)             |
| <b>Feeding Control (Met:Supp:DA) (%)</b>                       | 6:44:50            | 4:48:48                       | 11:33:56                       |
| <b>Follow-Up Duration (Weeks)</b>                              | 12 (9-21)          | 12 (6-24)                     | 12 (10 - 21)                   |
| <b>Funding Sources (A:I:AI:NR) (%)</b>                         | 47:9:25:19         | 44:13:26:17                   | 56:0:22:22                     |

885  
886 \* median (inter quartile range), unless otherwise indicated  
887 <sup>a</sup>24/32 trials provided data on sex  
888 <sup>b</sup> 30/32 trials reported baseline body weight  
889 <sup>c</sup> 28/32 trials reported baseline BMI  
890 <sup>d</sup> 11/32 trials provided data from which dose could be approximated  
891 <sup>e</sup> 20/32 trials provided data from which to approximate changes in caloric intake  
892 A, agency; AI, agency and industry; BMI, body mass index; C, crossover design; CHD, coronary  
893 heart disease; DA, dietary advice; DM, diabetes; GI, glycemic index; I, industry; IP, inpatient;  
894 LGI, low glycemic index; Met, metabolic; NR, not reported; OB, obese; OP, outpatient; OW,  
895 overweight; P, parallel design; Suppl, supplemented/provision of certain food

1  
2  
3  
4  
5  
6  
7  
8  
9  
10  
11  
12  
13  
14  
15  
16  
17  
18  
19  
20  
21  
22  
23  
24  
25  
26  
27  
28  
29  
30  
31  
32  
33  
34  
35  
36  
37  
38  
39  
40  
41  
42  
43  
44  
45  
46  
47  
48  
49  
50  
51  
52  
53  
54  
55  
56  
57  
58  
59  
60

For peer review only



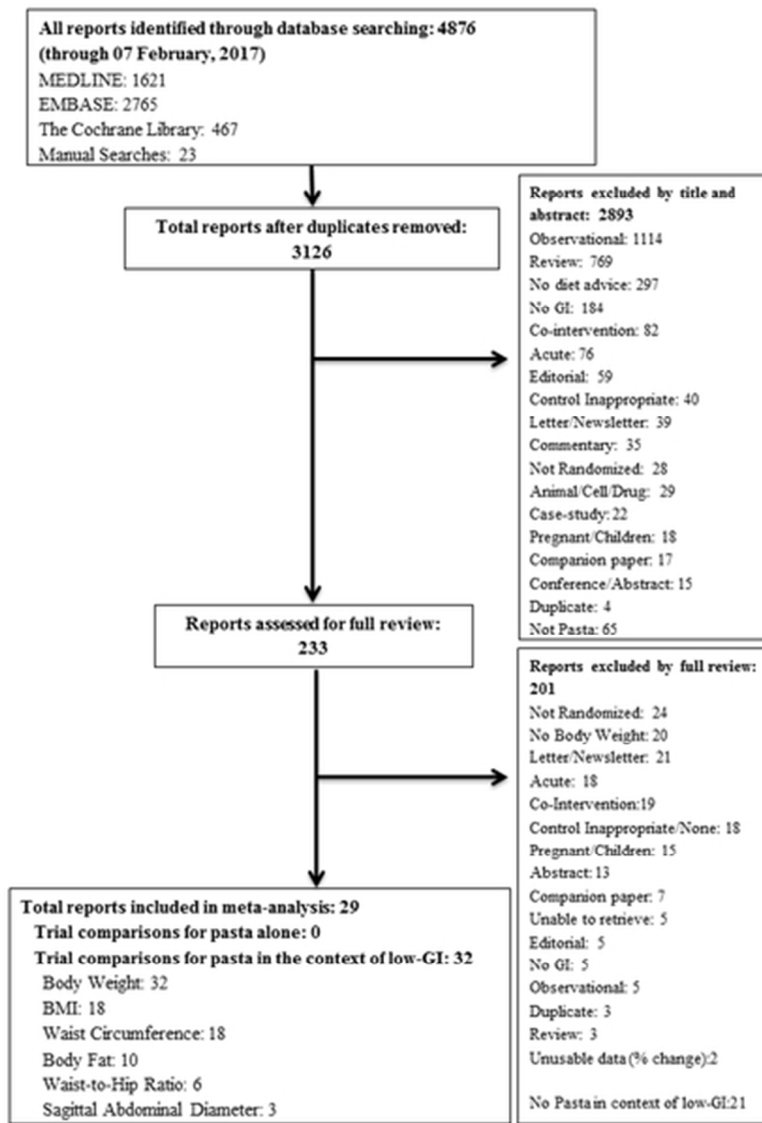

Figure 1: Literature Search

40x54mm (300 x 300 DPI)



Figure 2: Forest plot of randomized controlled trials investigating the effects of pasta in the context of low-GI dietary patterns on body weight (kg). n = 2448. Data are expressed as mean differences represented by a square and 95% CIs by the line through the square. 95% CIs exceeding the plot's bounds are represented by an arrowhead. Pooled effect estimates are represented by diamonds and were estimated with the use of generic inverse variance random effects models. Between-study heterogeneity was detected with the use of the Cochran's Q statistic at a significance level of P<0.10 and quantified with the use of the I<sup>2</sup> statistic where I<sup>2</sup>≥50% is considered to be evidence of substantial heterogeneity and ≥75% considerable heterogeneity.

CHD, coronary heart disease; CHO, carbohydrate; CI, confidence interval; HGI, higher glycemic index diet; GI, glycemic index; LGI, low glycemic index diet; MUFA, monounsaturated fatty acids; Pro, protein.

40x54mm (300 x 300 DPI)

1  
2  
3  
4  
5  
6  
7  
8  
9  
10  
11  
12  
13  
14  
15  
16  
17  
18  
19  
20  
21  
22  
23  
24  
25  
26  
27  
28  
29  
30  
31  
32  
33  
34  
35  
36  
37  
38  
39  
40  
41  
42  
43  
44  
45  
46  
47  
48  
49  
50  
51  
52  
53  
54  
55  
56  
57  
58  
59  
60

For peer review only

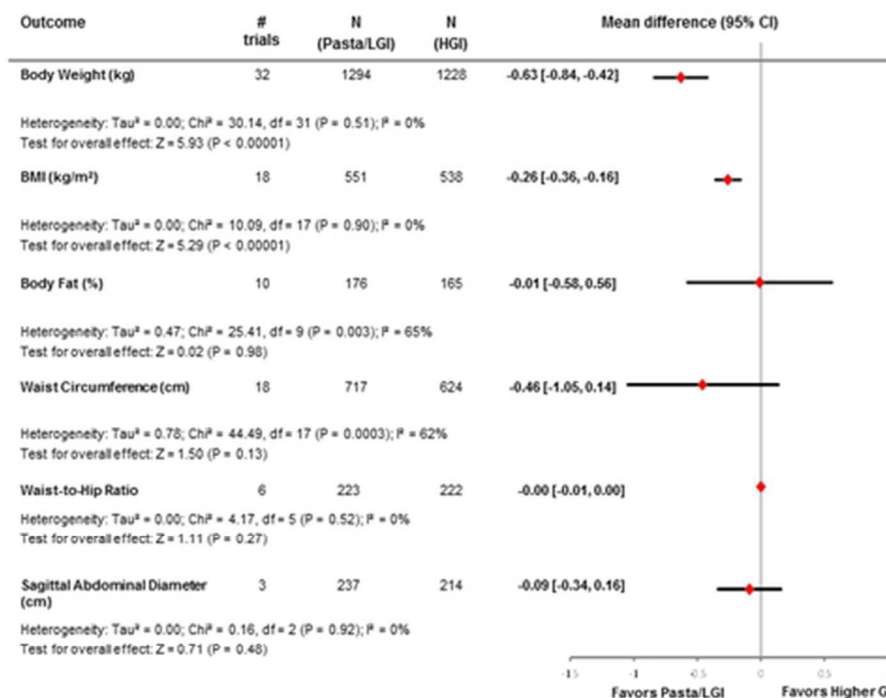

Figure 3: Plot of pooled effect estimates from randomized controlled trials investigating the effects of pasta in the context of low-GI dietary patterns on global and abdominal markers of adiposity. Pooled effect estimates are represented by diamonds and were estimated with the use of generic inverse variance random effects models. Between-study heterogeneity was detected with the use of the Cochran’s Q statistic at a significance level of  $P < 0.10$  and quantified with the use of the  $I^2$  statistic where  $I^2 \geq 50\%$  is considered to be evidence of substantial heterogeneity and  $\geq 75\%$  considerable heterogeneity.

BMI; body mass index; CI, confidence interval; HGI, higher glycemic index diet; LGI, low glycemic index diet.

40x54mm (300 x 300 DPI)

## Online Supplemental Information

### Table of Contents

|                                                                                                                                                                                                       |    |
|-------------------------------------------------------------------------------------------------------------------------------------------------------------------------------------------------------|----|
| Supplemental Tables.....                                                                                                                                                                              | 4  |
| Supplemental Table S1: PRISMA Checklist .....                                                                                                                                                         | 4  |
| Supplemental Table S2: Search strategy for studies assessing the effect of pasta in the context of low-GI dietary patterns on body weight in randomized controlled trials .....                       | 7  |
| Supplemental Table S3: PICO framework of the search strategy.....                                                                                                                                     | 9  |
| Supplement Table S4a: Trial characteristics .....                                                                                                                                                     | 10 |
| Supplement Table S4b: Trial characteristics continued.....                                                                                                                                            | 11 |
| Supplement Table S4c: Trial characteristics continued .....                                                                                                                                           | 12 |
| Supplement Table S4d: Trial characteristics continued.....                                                                                                                                            | 13 |
| Supplement Table S4e: Trial characteristics continued.....                                                                                                                                            | 14 |
| Supplemental Table S5: Sensitivity analysis of the systematic removal of each trial* .....                                                                                                            | 15 |
| Supplemental Table S6: Sensitivity analyses of the use of correlation coefficients of 0.25 and 0.75 for crossover trials.....                                                                         | 18 |
| Supplement Table S7. Continuous meta-regression analysis for the effect of pasta in the context of low-GI dietary patterns on body weight (kg) <sup>1</sup> .....                                     | 19 |
| Supplemental Table S8. Continuous meta-regression analysis for the effect of pasta in the context of low-GI dietary patterns on BMI (kg/m <sup>2</sup> ) <sup>1</sup> .....                           | 21 |
| Supplemental Table S9. Continuous meta-regression analysis for the effect of pasta in the context of low-GI dietary patterns on body fat (%) <sup>1</sup> .....                                       | 23 |
| Supplemental Table S10. Continuous meta-regression analysis for the effect of pasta in the context of low-GI dietary patterns on waist circumference (cm) <sup>1</sup> .....                          | 25 |
| Supplementary Table S11. Post-hoc piecewise linear continuous dose-response meta-regression analyses for the effect of pasta intake in the context of low-GI dietary patterns on body weight (kg). 27 |    |
| Supplementary Table S12: GRADE assessment of study quality .....                                                                                                                                      | 28 |
| Supplemental Figures .....                                                                                                                                                                            | 31 |
| Supplemental Figure S1: Cochrane risk of bias summary for all included trials.....                                                                                                                    | 32 |
| Supplemental Figure S2: Risk of bias proportion graph for all included trials.....                                                                                                                    | 32 |
| Supplemental Figure S3: Forest plot of randomized controlled trials investigating the effects of pasta in the context of low-GI dietary patterns on BMI (kg/m <sup>2</sup> ) (n= 1038) .....          | 34 |
| Supplemental Figure S4: Forest plot of randomized controlled trials investigating the effects of pasta in the context of low-GI dietary patterns on body fat (%) (n= 285) .....                       | 35 |

|    |                                                                                                                   |
|----|-------------------------------------------------------------------------------------------------------------------|
| 1  |                                                                                                                   |
| 2  |                                                                                                                   |
| 3  | Supplemental Figure S5: Forest plot of randomized controlled trials investigating the effects of pasta            |
| 4  | in the context of low-GI dietary patterns on waist circumference (cm) (n = 1380) ..... 36                         |
| 5  |                                                                                                                   |
| 6  | Supplemental Figure S6: Forest plot of randomized controlled trials investigating the effects of pasta            |
| 7  | in the context of low-GI dietary patterns on waist-to-hip ratio (n = 445) ..... 37                                |
| 8  |                                                                                                                   |
| 9  | Supplemental Figure S7: Forest plot of randomized controlled trials investigating the effects of pasta            |
| 10 | in the context of low-GI dietary patterns on sagittal abdominal diameter (cm) (n = 478) ..... 38                  |
| 11 |                                                                                                                   |
| 12 | Supplemental Figure S8: Forest plot of randomized controlled trials investigating the effects of pasta            |
| 13 | in the context of low-GI dietary patterns on body weight (kg) using fixed effects models (n = 2448) .. 39         |
| 14 |                                                                                                                   |
| 15 | Supplemental Figure S9: Forest plot of randomized controlled trials which contain data for                        |
| 16 | approximating pasta intake which are investigating the effects of pasta in the context of low-GI                  |
| 17 | dietary patterns on body weight (kg) (n = 740) ..... 40                                                           |
| 18 |                                                                                                                   |
| 19 | Supplemental Figure S10: Subgroup analysis for mean differences (95% CIs) of the effects of pasta in              |
| 20 | the context of low-GI dietary patterns on body weight (kg) (n = 2448) ..... 41                                    |
| 21 |                                                                                                                   |
| 22 | Supplemental Figure S11: Subgroup analysis for mean differences (95% CIs) of the effects of pasta in              |
| 23 | the context of low-GI dietary patterns on body weight (kg) continued (n = 2448) ..... 43                          |
| 24 |                                                                                                                   |
| 25 | Supplemental Figure S12: A priori subgroup analyses on risk of bias for mean differences (95% CIs) of             |
| 26 | the effect of pasta in the context of low-GI dietary patterns on body weight (kg) (n = 2448) ..... 45             |
| 27 |                                                                                                                   |
| 28 | Supplemental Figure S13: Subgroup analysis for mean differences (95% CIs) of the effects of pasta in              |
| 29 | the context of low-GI dietary patterns on body mass index, BMI (kg/m <sup>2</sup> ) (n = 1038) ..... 47           |
| 30 |                                                                                                                   |
| 31 | Supplemental Figure S14: Subgroup analysis for mean differences (95% CIs) of the effects of pasta in              |
| 32 | the context of low-GI dietary patterns on body mass index, BMI (kg/m <sup>2</sup> ) continued (n = 1038) ..... 49 |
| 33 |                                                                                                                   |
| 34 | Supplemental Figure S15: A priori subgroup analyses on risk of bias for mean differences (95% CIs) of             |
| 35 | the effect of pasta in the context of low-GI dietary patterns on body mass index, BMI (kg/m <sup>2</sup> ) (n =   |
| 36 | 1038) ..... 51                                                                                                    |
| 37 |                                                                                                                   |
| 38 | Supplemental Figure S16: Subgroup analysis for mean differences (95% CIs) of the effects of pasta in              |
| 39 | the context of low-GI dietary patterns on body fat (%) (n = 285) ..... 53                                         |
| 40 |                                                                                                                   |
| 41 | Supplemental Figure S17: A priori subgroup analyses on risk of bias for mean differences (95% CIs) of             |
| 42 | the effect of pasta in the context of low-GI dietary patterns on body fat (%) (n = 285) ..... 55                  |
| 43 |                                                                                                                   |
| 44 | Supplemental Figure S18: Subgroup analysis for mean differences (95% CIs) of the effects of pasta in              |
| 45 | the context of low-GI dietary patterns on waist circumference (cm) (n = 1380) ..... 57                            |
| 46 |                                                                                                                   |
| 47 | Supplemental Figure S19: Subgroup analysis for mean differences (95% CIs) of the effects of pasta in              |
| 48 | the context of low-GI dietary patterns on waist circumference (cm) continued (n = 1380) ..... 59                  |
| 49 |                                                                                                                   |
| 50 | Supplemental Figure S20: A priori subgroup analyses on risk of bias for mean differences (95% CIs) of             |
| 51 | the effect of pasta in the context of low-GI dietary patterns on waist circumference (cm) (n = 1380). 61          |
| 52 |                                                                                                                   |
| 53 | Supplemental Figure S21: Continuous meta-regression of change in carbohydrate intake in the low-GI                |
| 54 | dietary pattern intervention arms with change in body weight (n=19) ..... 63                                      |
| 55 |                                                                                                                   |
| 56 |                                                                                                                   |
| 57 |                                                                                                                   |
| 58 |                                                                                                                   |
| 59 |                                                                                                                   |
| 60 |                                                                                                                   |

1  
2  
3  
4  
5  
6  
7  
8  
9  
10  
11  
12  
13  
14  
15  
16  
17  
18  
19  
20  
21  
22  
23  
24  
25  
26  
27  
28  
29  
30  
31  
32  
33  
34  
35  
36  
37  
38  
39  
40  
41  
42  
43  
44  
45  
46  
47  
48  
49  
50  
51  
52  
53  
54  
55  
56  
57  
58  
59  
60

Supplemental Figure S22: Continuous meta-regression of change in protein intake in the low-GI dietary pattern intervention arms with change in body weight (n=19) ..... 64

Supplemental Figure S23: Pasta intake dose-response analyses by spline curve modeling (MKSPLINE procedure) ..... 65

Supplemental Figure S24: Funnel plot for the effect of pasta in the context of low-GI dietary patterns on body weight (kg) ..... 66

Supplemental Figure S25: Funnel plot for the effect of pasta in the context of low-GI dietary patterns on BMI (kg/m<sup>2</sup>)..... 67

Supplemental Figure S26: Funnel plot for the effect of pasta in the context of low-GI dietary patterns on body fat (%)..... 68

Supplemental Figure S27: Funnel plot for the effect of pasta in the context of low-GI dietary patterns on waist circumference (cm) ..... 69

For peer review only

## Supplemental Tables

### Supplemental Table S1: PRISMA Checklist

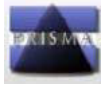

## PRISMA 2009 Checklist

| Section/topic             | #  | Checklist item                                                                                                                                                                                                                                                                                              | Reported on page #         |
|---------------------------|----|-------------------------------------------------------------------------------------------------------------------------------------------------------------------------------------------------------------------------------------------------------------------------------------------------------------|----------------------------|
| <b>TITLE</b>              |    |                                                                                                                                                                                                                                                                                                             |                            |
| Title                     | 1  | Identify the report as a systematic review, meta-analysis, or both.                                                                                                                                                                                                                                         | 1                          |
| <b>ABSTRACT</b>           |    |                                                                                                                                                                                                                                                                                                             |                            |
| Structured summary        | 2  | Provide a structured summary including, as applicable: background; objectives; data sources; study eligibility criteria, participants, and interventions; study appraisal and synthesis methods; results; limitations; conclusions and implications of key findings; systematic review registration number. | 2-3                        |
| <b>INTRODUCTION</b>       |    |                                                                                                                                                                                                                                                                                                             |                            |
| Rationale                 | 3  | Describe the rationale for the review in the context of what is already known.                                                                                                                                                                                                                              | 5                          |
| Objectives                | 4  | Provide an explicit statement of questions being addressed with reference to participants, interventions, comparisons, outcomes, and study design (PICOS).                                                                                                                                                  | 5                          |
| <b>METHODS</b>            |    |                                                                                                                                                                                                                                                                                                             |                            |
| Protocol and registration | 5  | Indicate if a review protocol exists, if and where it can be accessed (e.g., Web address), and, if available, provide registration information including registration number.                                                                                                                               | 6                          |
| Eligibility criteria      | 6  | Specify study characteristics (e.g., PICOS, length of follow-up) and report characteristics (e.g., years considered, language, publication status) used as criteria for eligibility, giving rationale.                                                                                                      | 6-7, Supplemental Table S2 |
| Information sources       | 7  | Describe all information sources (e.g., databases with dates of coverage, contact with study authors to identify additional studies) in the search and date last searched.                                                                                                                                  | 6, Supplemental Table S1   |
| Search                    | 8  | Present full electronic search strategy for at least one database, including any limits used, such that it could be repeated.                                                                                                                                                                               | Supplemental Table S1      |
| Study selection           | 9  | State the process for selecting studies (i.e., screening, eligibility, included in systematic review, and, if applicable, included in the meta-analysis).                                                                                                                                                   | 6-7, Figure 1              |
| Data collection process   | 10 | Describe method of data extraction from reports (e.g., piloted forms, independently, in duplicate) and any processes for obtaining and confirming data from investigators.                                                                                                                                  | 7                          |



|                                    |    |                                                                                                                                                                                                                        |                          |
|------------------------------------|----|------------------------------------------------------------------------------------------------------------------------------------------------------------------------------------------------------------------------|--------------------------|
| Data items                         | 11 | List and define all variables for which data were sought (e.g., PICOS, funding sources) and any assumptions and simplifications made.                                                                                  | 7, Supplemental Table S2 |
| Risk of bias in individual studies | 12 | Describe methods used for assessing risk of bias of individual studies (including specification of whether this was done at the study or outcome level), and how this information is to be used in any data synthesis. | 7                        |
| Summary measures                   | 13 | State the principal summary measures (e.g., risk ratio, difference in means).                                                                                                                                          | 8                        |
| Synthesis of results               | 14 | Describe the methods of handling data and combining results of studies, if done, including measures of consistency (e.g., $I^2$ ) for each meta-analysis.                                                              | 8-10                     |

| Section/topic                 | #  | Checklist item                                                                                                                                                                                           | Reported on page #                             |
|-------------------------------|----|----------------------------------------------------------------------------------------------------------------------------------------------------------------------------------------------------------|------------------------------------------------|
| Risk of bias across studies   | 15 | Specify any assessment of risk of bias that may affect the cumulative evidence (e.g., publication bias, selective reporting within studies).                                                             | 10                                             |
| Additional analyses           | 16 | Describe methods of additional analyses (e.g., sensitivity or subgroup analyses, meta-regression), if done, indicating which were pre-specified.                                                         | 8-10                                           |
| <b>RESULTS</b>                |    |                                                                                                                                                                                                          |                                                |
| Study selection               | 17 | Give numbers of studies screened, assessed for eligibility, and included in the review, with reasons for exclusions at each stage, ideally with a flow diagram.                                          | 11, Figure 1                                   |
| Study characteristics         | 18 | For each study, present characteristics for which data were extracted (e.g., study size, PICOS, follow-up period) and provide the citations.                                                             | 11-12, Table 1, Supplemental Tables S2-S3      |
| Risk of bias within studies   | 19 | Present data on risk of bias of each study and, if available, any outcome level assessment (see item 12).                                                                                                | 12, Supplemental Figures S1-S2                 |
| Results of individual studies | 20 | For all outcomes considered (benefits or harms), present, for each study: (a) simple summary data for each intervention group (b) effect estimates and confidence intervals, ideally with a forest plot. | 12-13, Figures 2-3, Supplemental Figures S3-S7 |
| Synthesis of results          | 21 | Present results of each meta-analysis done, including confidence intervals and measures of consistency.                                                                                                  | 12-13, Figures 2-3, Supplemental Figures S3-S7 |
| Risk of bias                  | 22 | Present results of any assessment of risk of bias across studies                                                                                                                                         | 12,16                                          |

|                     |    |                                                                                                                                                                                      |                                                                |
|---------------------|----|--------------------------------------------------------------------------------------------------------------------------------------------------------------------------------------|----------------------------------------------------------------|
| across studies      |    | (see Item 15).                                                                                                                                                                       | Supplemental Table S1, S2, S12, S15, S17, S20                  |
| Additional analysis | 23 | Give results of additional analyses, if done (e.g., sensitivity or subgroup analyses, meta-regression [see Item 16]).                                                                | 13-16, Supplemental Tables S4-S10, Supplemental Figures S8-S26 |
| <b>DISCUSSION</b>   |    |                                                                                                                                                                                      |                                                                |
| Summary of evidence | 24 | Summarize the main findings including the strength of evidence for each main outcome; consider their relevance to key groups (e.g., healthcare providers, users, and policy makers). | 17-20                                                          |
| Limitations         | 25 | Discuss limitations at study and outcome level (e.g., risk of bias), and at review-level (e.g., incomplete retrieval of identified research, reporting bias).                        | 20-22                                                          |
| Conclusions         | 26 | Provide a general interpretation of the results in the context of other evidence, and implications for future research.                                                              | 22-24                                                          |
| <b>FUNDING</b>      |    |                                                                                                                                                                                      |                                                                |
| Funding             | 27 | Describe sources of funding for the systematic review and other support (e.g., supply of data); role of funders for the systematic review.                                           | 27-28                                                          |

From: Moher D, Liberati A, Tetzlaff J, Altman DG, The PRISMA Group (2009). Preferred Reporting Items for Systematic Reviews and Meta-Analyses: The PRISMA Statement. PLoS Med 6(7): e1000097. doi:10.1371/journal.pmed1000097

For more information, visit: [www.prisma-statement.org](http://www.prisma-statement.org).

**Supplemental Table S2: Search strategy for studies assessing the effect of pasta in the context of low-GI dietary patterns on body weight in randomized controlled trials**

| Database | Search Period             | Search Terms                                                                                                                                                                                                                                                                                                                                                                                                                                                                                                                                                                                                                                                                                                                                     |
|----------|---------------------------|--------------------------------------------------------------------------------------------------------------------------------------------------------------------------------------------------------------------------------------------------------------------------------------------------------------------------------------------------------------------------------------------------------------------------------------------------------------------------------------------------------------------------------------------------------------------------------------------------------------------------------------------------------------------------------------------------------------------------------------------------|
| Medline  | 1946 to February 07, 2017 | <ol style="list-style-type: none"> <li>1. pasta/</li> <li>2. spaghetti/</li> <li>3. macaroni/</li> <li>4. lasagna/</li> <li>5. fusilli/</li> <li>6. noodle/</li> <li>7. glycaemic index.tw.</li> <li>8. glycemic index.tw.</li> <li>9. glycaemic ind*.tw.</li> <li>10. glycemic ind*.tw.</li> <li>11. glycemic load*.tw.</li> <li>12. glycaemic load*.tw.</li> <li>13. glycemic index/</li> <li>14. body mass index/</li> <li>15. body mass index.tw.</li> <li>16. BMI.tw.</li> <li>17. overweight.tw.</li> <li>18. weight*.tw.</li> <li>19. 1 or 2 or 3 or 4 or 5 or 6 or 7 or 8 or 9 or 10 or 11 or 12 or 13</li> <li>20. 14 or 15 or 16 or 17 or 18</li> <li>21. 19 and 20</li> <li>22. limit 21 to animals</li> <li>23. 21 not 22</li> </ol> |
| Embase   | 1946 to February 07, 2017 | <ol style="list-style-type: none"> <li>1. pasta/</li> <li>2. spaghetti/</li> <li>3. macaroni/</li> <li>4. lasagna/</li> <li>5. fusilli/</li> <li>6. noodle/</li> <li>7. glycaemic index.tw.</li> <li>8. glycemic index.tw.</li> <li>9. glycaemic ind*.tw.</li> <li>10. glycemic ind*.tw.</li> <li>11. glycemic load*.tw.</li> <li>12. glycaemic load*.tw.</li> <li>13. glycemic index/</li> <li>14. body mass index/</li> <li>15. body mass index.tw.</li> <li>16. BMI.tw.</li> <li>17. overweight.tw.</li> <li>18. weight*.tw.</li> </ol>                                                                                                                                                                                                       |

|                      |                           |                                                                                                                                                                                                                                                                                                                                                                                                                                                                                                                                                                            |
|----------------------|---------------------------|----------------------------------------------------------------------------------------------------------------------------------------------------------------------------------------------------------------------------------------------------------------------------------------------------------------------------------------------------------------------------------------------------------------------------------------------------------------------------------------------------------------------------------------------------------------------------|
|                      |                           | <p>19. 1 or 2 or 3 or 4 or 5 or 6 or 7 or 8 or 9 or 10 or 11 or 12 or 13<br/> 20. 14 or 15 or 16 or 17 or 18<br/> 21. 19 and 20<br/> 22. limit 21 to animals<br/> 23. 21 not 22</p>                                                                                                                                                                                                                                                                                                                                                                                        |
| The Cochrane Library | 1946 to February 07, 2017 | <p>1. pasta/<br/> 2. spaghetti/<br/> 3. macaroni/<br/> 4. lasagna/<br/> 5. fusilli/<br/> 6. noodle/<br/> 7. glycemic index/<br/> 8. glycaemic ind*.tw.<br/> 9. glycemic ind*.tw.<br/> 10. glycemic load*.tw.<br/> 11. glycaemic load*.tw.<br/> 12. exp body weight/<br/> 13. body weight*.tw.<br/> 14. BMI.tw.<br/> 15. body mass index/<br/> 16. body mass index.tw.<br/> 17. weight*.tw.<br/> 18. 1 or 2 or 3 or 4 or 5 or 6 or 7 or 8 or 9 or 10 or 11<br/> 19. 12 or 13 or 14 or 15 or 16 or 17<br/> 20. 18 and 19<br/> 21. limit 20 to animals<br/> 22. 20 not 21</p> |

1  
2  
3  
4  
5  
6  
7  
8  
9  
10  
11  
12  
13  
14  
15  
16  
17  
18  
19  
20  
21  
22  
23  
24  
25  
26  
27  
28  
29  
30  
31  
32  
33  
34  
35  
36  
37  
38  
39  
40  
41  
42  
43  
44  
45  
46  
47

**Supplemental Table S3: PICO framework of the search strategy**

| <b>PICO framework<sup>a</sup> defined in the present systematic review and meta-analysis</b> |                                                                                      |                                                                                     |                                                                                                   |
|----------------------------------------------------------------------------------------------|--------------------------------------------------------------------------------------|-------------------------------------------------------------------------------------|---------------------------------------------------------------------------------------------------|
| <b>Participants</b>                                                                          | <b>Interventions</b>                                                                 | <b>Comparators</b>                                                                  | <b>Outcomes</b>                                                                                   |
| Adult men and women excluding pregnant or breastfeeding women                                | Low glycemic index interventions where pasta is included as part of the intervention | Higher glycemic index diets where pasta is not included as part of the intervention | Body weight<br>Body mass index (BMI)<br>Body Fat (%)<br>Waist circumference<br>Waist-to-hip ratio |

a Moher D, Shamseer L, Clarke M, Ghersi D, Liberati A, Petticrew M, Shekelle P, Stewart LA and PRISMA-P Group. Preferred reporting items for systematic review and meta-analysis protocols (PRISMA-P) 2015 statement. Systematic Reviews 2015; 4:1. <https://doi.org/10.1186/2046-4053-4-1>

Supplement Table S4a: Trial characteristics

| Overweight/Obese Trials      |                |                              |                   |                                     |                                             |                               |                      |         |        |                   |                |                           |                                       |                           |
|------------------------------|----------------|------------------------------|-------------------|-------------------------------------|---------------------------------------------|-------------------------------|----------------------|---------|--------|-------------------|----------------|---------------------------|---------------------------------------|---------------------------|
| Study                        | Subjects       | Sample Description           | Mean Age (y) (SD) | Mean Baseline Body Weight (kg) (SD) | Mean Baseline BMI (kg/m <sup>2</sup> ) (SD) | Mean GI:GL of diet (SD) ¶ ¶ ¶ | Pasta Dose (serv/wk) | Setting | Design | Energy Balance§   | Duration (wks) | Diet Composition % (SD)§§ | Dietary Prescription                  | Funding Source            |
| Karl et al. 2015 †††         | 39 (19M:20F)** | OB, OP                       |                   |                                     |                                             |                               | 2.33                 | USA     | P      | Negative+ Neutral | 17             |                           | CR to 2/3kcal; Metabolic              | Agency                    |
| Low GI                       | 20             |                              | 56 (5)*           | 92.9 (13.6)*                        | 32.3 (3.4)*                                 | 42:133                        |                      |         |        |                   |                | 68:15:16                  |                                       |                           |
| Higher GI                    | 19             |                              | 56 (5)*           | 94 (9.7)*                           | 33.4 (2.6)*                                 | 61:201                        |                      |         |        |                   |                | 70:16:14                  |                                       |                           |
| Pereira et al. 2015          | 19 (4M:15F)**  | OW, IP/OP                    |                   |                                     |                                             |                               | NR                   | Brazil  | P      | Neutral           | 6.4            |                           | Ad libitum                            | Unknown                   |
| Low GI                       | 10             |                              | 28(5)             | 80.0(12.6)                          | 29.9 (2.1)                                  | 41.2(2.2) ¥ **                |                      |         |        |                   |                | 48.3:16.1:32.8            |                                       |                           |
| Higher GI                    | 9              |                              | 26(3)             | 79.1(12.2)                          | 29.1 (2.0)                                  | 74.1(2.9) ¥ **                |                      |         |        |                   |                | 54.6:12.7:34.4            |                                       |                           |
| Buscemi et al. 2013          | 40 (19M:21F)** | OW/OB, high CVD risk, OP     |                   |                                     |                                             |                               | NR                   | Italy   | P      | Negative          | 12             |                           | CR to 20kcal/kg/d; Ad libitum         | Unknown                   |
| Low GI                       | 19             |                              | 51 (8)            | 93.8 (17.3)                         | 34.3 (6.6)                                  | 48.1: 138                     |                      |         |        |                   |                | 56:18:26                  |                                       |                           |
| Higher GI                    | 21             |                              | 49 (8)            | 93.2 (14.4)                         | 34.5 (5.1)                                  | 59.3: 174                     |                      |         |        |                   |                | 57:16:27                  |                                       |                           |
| Costa et al. 2012            | 17 (7M:10F)    | OW, IP/OP                    | 25.4 (5.8)        | 84.1(16.3)                          | 26.3(3.2)                                   |                               | NR                   | Brazil  | C      | Neutral           | 4              |                           | Ab libitum,2 meals+3 fruit/d provided | NR                        |
| Low GI                       |                |                              |                   |                                     |                                             | 47.5(3.8)                     |                      |         |        |                   |                | 58.6:13.9:25.5            |                                       |                           |
| Higher GI                    |                |                              |                   |                                     |                                             | 61.6(2.8)                     |                      |         |        |                   |                | 55.4:14.2:30.3            |                                       |                           |
| Jebb et al. 2010 - High MUFA | 225**          | OH, some CV risk factors, OP | ~52               |                                     | ~28.5 <sup>+</sup>                          |                               | 1.75                 | UK      | P      | Neutral           | 24             |                           | Ad Libitum, key foods provided        | Agency, foods by industry |
| Low GI                       | 115            |                              |                   | 83.7 (69.6-93.1)¶¶¶                 |                                             | ~55.2                         |                      |         |        |                   |                | ~44.6:16.4:35.7****       |                                       |                           |
| Higher GI                    | 110            |                              |                   | 80.5 (70.0-92.1)¶¶¶                 |                                             | ~63.3                         |                      |         |        |                   |                | ~44.9:15.3:35.6****       |                                       |                           |
| Jebb et al. 2010 - Low Fat   | 250**          | OH, some CV risk factors, OP | ~52               |                                     | ~28.5 <sup>+</sup>                          |                               | 3.5                  | UK      | P      | Neutral           | 24             |                           | Ad Libitum, key foods provided        | Agency, foods by industry |
| Low GI                       | 117            |                              |                   | 79.4 (70.1- 91.8)¶¶¶                |                                             | ~56.3                         |                      |         |        |                   |                | ~51.5:14.2:26.1****       |                                       |                           |
| Higher GI                    | 111            |                              |                   | 80.7 (71.4- 91.4)¶¶¶                |                                             | ~64.4                         |                      |         |        |                   |                | ~51.1:15.7:27.5****       |                                       |                           |
| Larsen et al. 2010-High Pro  | 231**          | OW/OB, OP                    |                   |                                     | NR                                          |                               | NR                   | Europe  | P      | Neutral           | 26             |                           | Ad libitum                            | Agency                    |
| Low GI                       | 124            |                              | 42.1 (6.5)        | 88.5 (15.6)                         |                                             | ~56.5: 108.9                  |                      |         |        |                   |                | ~43:22:32                 |                                       |                           |
| Higher GI                    | 107            |                              | 42 (5.7)          | 89.5 (17.1)                         |                                             | ~61.4: 113.1                  |                      |         |        |                   |                | ~45:23:31                 |                                       |                           |
| Larsen et al. 2010 - Low Pro | 203 **         | OW/OB, OP                    |                   |                                     | NR                                          |                               | NR                   | Europe  | P      | Neutral           | 26             |                           | Ad libitum                            | Agency                    |
| Low GI                       | 106            |                              | 42.2 (5.7)        | 88.4 (15.7)                         |                                             | ~56.2: 121                    |                      |         |        |                   |                | ~51:18:30                 |                                       |                           |
| Higher GI                    | 97             |                              | 42 (5.9)          | 86.6 (13.8)                         |                                             | ~61.6: 137.9                  |                      |         |        |                   |                | ~51:17:31                 |                                       |                           |

## Supplement Table S4b: Trial characteristics continued

| Overweight/Obese Trials continued |               |                         |                   |                                     |                                             |                                          |                      |         |        |                            |                |                                                     |                                           |                  |  |
|-----------------------------------|---------------|-------------------------|-------------------|-------------------------------------|---------------------------------------------|------------------------------------------|----------------------|---------|--------|----------------------------|----------------|-----------------------------------------------------|-------------------------------------------|------------------|--|
| Study                             | Subjects      | Sample Description      | Mean Age (y) (SD) | Mean Baseline Body Weight (kg) (SD) | Mean Baseline BMI (kg/m <sup>2</sup> ) (SD) | Mean GI:GL of diet (SD) ¶ ¶ ¶            | Pasta Dose (serv/wk) | Setting | Design | Energy Balance§            | Duration (wks) | Diet Composition % (SD)§§                           | Dietary Prescription                      | Funding Source   |  |
| Solomon et al. 2010               | 22 (8M:14F)** | OB, Pre-T2DM, OP        |                   |                                     |                                             |                                          | 7                    | USA     | P      | Neutral                    | 12             |                                                     | Metabolic plus exercise program           | Agency           |  |
| Low GI                            | 10 (3M:7F)    |                         | 67 (6)            | 97.4 (12.0)                         | 34.9 (1.1)                                  | 39.8 (0.9)                               |                      |         |        |                            |                | 54.7(0.3):28.3(0.3):17.0(0.3)                       |                                           |                  |  |
| Higher GI                         | 12 (5M:7F)    |                         | 64 (3)            | 94.7 (15.2)                         | 34.1 (1.1)                                  | 80.0 (2.1)                               |                      |         |        |                            |                | 55.6(0.7):27.8(0.7):16.6(0.3)                       |                                           |                  |  |
| Philippou et al. 2009- 6 mo       | 38**          | ≥1 CHD risk factors, OP | (35-65) ¶         |                                     |                                             |                                          | NR                   | UK      | P      | Negative (for all but n=2) | 24             |                                                     | 500kcal CR; Ad libitum                    | Agency           |  |
| Low GI                            | 22            |                         |                   | 91.3(14.8)***                       | 29.1 (3.6)***                               | 50.6 (4.6):<br>114.4(31.5)               |                      |         |        |                            |                |                                                     |                                           |                  |  |
| Higher GI                         | 16            |                         |                   | 97.5(16.4)***                       | 30.5 (3.5)***                               | 63.2(5.6):<br>175.0(45.6)                |                      |         |        |                            |                |                                                     |                                           |                  |  |
| Philippou et al. 2009- 4 mo       | 42**          | OW, OP                  | (18-65)¶          |                                     |                                             |                                          | NR                   | UK      | P      | Neutral                    | 16             |                                                     | Ad libitum                                | Unknown          |  |
| Low GI                            | 23            |                         |                   | 87.2 (15.3)                         | 32.5 (4.8)                                  | 49.7(5.7):89.7(27.5)                     |                      |         |        |                            |                | 47.6(6.7):19.5(4.2):31.8(5.8)                       |                                           |                  |  |
| Higher GI                         | 19            |                         |                   | 83.6 (13.4)                         | 31.3 (4.8)                                  | 63.7(9.4):136.8(56.3)                    |                      |         |        |                            |                | 48.9(7):19.3(4.9):30.9(9)                           |                                           |                  |  |
| Abete et al. 2008                 | 32 (18M:14F)  | OB, OP                  | 36(7)             |                                     |                                             |                                          | 2.33                 | Spain   | P      | Negative                   | 8              |                                                     | 30% CR; Ad libitum, 3-day menus           | Agency           |  |
| Low GI                            | 16            |                         |                   | 94.3(16.1)                          | 32.8 (4.3)                                  | (40-45)¶                                 |                      |         |        |                            |                | 50.2 (1.8):18.3(1.6):31.5(1.6)                      |                                           |                  |  |
| Higher GI                         | 16            |                         |                   | 94.4(13.1)                          | 32.2 (4.4)                                  | (60-65)¶                                 |                      |         |        |                            |                | 47.8(6.8):19.6(5.6):32.6(4.3)                       |                                           |                  |  |
| Aston et al. 2008                 | 19 (0M:19F)** | OW/OB, OP               | 51.9(7.6)         | 87.5 (15)                           | 33.1 (4.9)                                  |                                          | 3.33                 | UK      | C      | Neutral                    | 12             |                                                     | Ad libitum, key CHO foods provided        | Agency           |  |
| Low GI                            |               |                         |                   |                                     |                                             | 55.5(3.8):<br>133.8(22.9)*****           |                      |         |        |                            |                | 51.4(6.0):17.0(2.4):32.2(5.1)*<br>***               |                                           |                  |  |
| Higher GI                         |               |                         |                   |                                     |                                             | 63.9(3):<br>138.8(30.5)*****             |                      |         |        |                            |                | 47.6(6.1):17.6(3.3):34.1(5.7)*<br>***               |                                           |                  |  |
| Jensen et al. 2008                | 44 (0M:44F)** | OW, OP                  | (20-40)¶          |                                     |                                             |                                          | 3                    | Denmark | P      | Neutral                    | 10             |                                                     | Ad libitum, partial provision, menu plans | Agency, Industry |  |
| Low GI                            | 22 (0M:22F)   |                         |                   | 77.9(6.9)                           | 27.4 (1.5)                                  | 72¥                                      |                      |         |        |                            |                | ~57(5):17(0):23(5) ‡                                |                                           |                  |  |
| Higher GI                         | 22 (0M:22F)   |                         |                   | 80.2(1.4)                           | 27.6 (0.3)                                  | 95¥                                      |                      |         |        |                            |                | ~57(5):17(0):22(5) ‡                                |                                           |                  |  |
| Philippou et al. 2008             | 13 (5M:8F)**  | ≥1 CHD risk factors, OP |                   |                                     |                                             |                                          | NR                   | UK      | P      | Negative                   | 12             |                                                     | 500kcal CR; Ad libitum                    | Agency           |  |
| Low GI                            | 7 (3M:4F)     |                         | 54 (49-58)¶¶      | 81.5 (4.7)***                       | 28.7 (2.1)***                               | 51.3(51.0-52.0):<br>105.6 (76.9-110.1)¶¶ |                      |         |        |                            |                | 46.0(37.8-51.0): 17.1(15.7-17.4): 32.8(31.3-37.1)¶¶ |                                           |                  |  |
| Higher GI                         | 6 (2M:4F)     |                         | 45 (39-50)¶¶      | 89.7 (12.8)***                      | 31.5 (4.4)***                               | 59.3(59.2-64.0):<br>114.7(98.5-134.9)¶¶  |                      |         |        |                            |                | 49.4(47.8-51.7):19.6(14.0-23.1):29.2(25.2-34.5)¶¶   |                                           |                  |  |

Supplement Table S4c: Trial characteristics continued

| Overweight/Obese Trials continued        |                 |                    |                   |                                     |                                             |                               |                      |         |           |                 |                |                                  |                                                      |                  |
|------------------------------------------|-----------------|--------------------|-------------------|-------------------------------------|---------------------------------------------|-------------------------------|----------------------|---------|-----------|-----------------|----------------|----------------------------------|------------------------------------------------------|------------------|
| Study                                    | Subjects        | Sample Description | Mean Age (y) (SD) | Mean Baseline Body Weight (kg) (SD) | Mean Baseline BMI (kg/m <sup>2</sup> ) (SD) | Mean GI:GL of diet (SD) ¶ ¶ ¶ | Pasta Dose (serv/wk) | Setting | Design    | Energy Balance§ | Duration (wks) | Diet Composition % (SD)§§        | Dietary Prescription                                 | Funding Source   |
| Bellisile et al. 2007                    | 65 (0M:65F)**   | OW/OB, OP          |                   |                                     |                                             |                               |                      | NR      | France    | P               | Neutral        | 12                               | Ad libitum                                           | Industry         |
| Low GI                                   | 35              |                    | 46.1 (13.6)       | 80 (13.2)                           | 30.2 (4.1)                                  | na                            |                      |         |           |                 |                |                                  |                                                      |                  |
| Higher GI                                | 30              |                    | 45.3 (12.0)       | 79 (13.1)                           | 30.4 (4.4)                                  | na                            |                      |         |           |                 |                |                                  |                                                      |                  |
| de Rougemont et al. 2007                 | 38 (22M:16F)**  | OW, OP             |                   |                                     |                                             |                               | 2.8                  | France  | P         | Neutral         | 5              |                                  | Ad libitum, some foods provided                      | Agency, Industry |
| Low GI                                   | 19              |                    | 36.3 (8.7)        | 77.2 (9.6)                          | 27.5 (1.3)                                  | 46.5 (1.3)                    |                      |         |           |                 |                | 42.6 (3.9):19.8 (1.7):37.7 (4.4) |                                                      |                  |
| Higher GI                                | 19              |                    | 40.4 (9.6)        | 77.3 (9.2)                          | 27.2 (1.3)                                  | 66.3 (2.6)                    |                      |         |           |                 |                | 44.1 (3.5):17.6 (1.7):38.4 (3.1) |                                                      |                  |
| Sichieri et al. 2007                     | 123 (0M:123F)** | OW, OP             |                   |                                     |                                             |                               |                      | NR      | Brazil    | P               | Negative       | 72                               | 100-300kcal CR; 6-d menu and exchange lists provided | Agency           |
| Low GI                                   | 63              |                    | 37.2 (5.4)*       | 67.7 (6.6)*                         | na                                          | 21(38): 74(84)                |                      |         |           |                 |                | 59.5 (6.3): 13.3: 27.2(4.6)      |                                                      |                  |
| Higher GI                                | 60              |                    | 37.5 (5.6)*       | 68.5 (7.5)*                         | na                                          | 51(28): 199(43)               |                      |         |           |                 |                | 61.6 (6.2): 12.3: 26.1(4.7)      |                                                      |                  |
| McMillian-Price et al. 2006-High Carb    | 64(16M:48F)     | OW/OB, OP          |                   |                                     |                                             |                               |                      | NR      | Australia | P               | Negative       | 12                               | Ad libitum, key foods and meals provided             | Agency-Industry  |
| Low GI                                   | 32              |                    | 30.5 (7.9)        | 87.1 (15.3)                         | 30.6 (4.5)                                  | 45 (6):89 (28)                |                      |         |           |                 |                | 56 (6):19 (0):22 (6)             |                                                      |                  |
| Higher GI                                | 32              |                    | 31.8 (9.6)        | 86 (10.7)                           | 30.9 (3.4)                                  | 70 (6):129 (45)               |                      |         |           |                 |                | 60 (6):18 (6):19 (6)             |                                                      |                  |
| McMillian-Price et al. 2006-High Protein | 65(15M:50F)     | OW/OB, OP          |                   |                                     |                                             |                               |                      | NR      | Australia | P               | Negative       | 12                               | Ad libitum, key foods and meals provided             | Agency-Industry  |
| Low GI                                   | 33              |                    | 34.6 (8.6)        | 88.4 (17.2)                         | 32.1 (5.2)                                  | 44 (6):59 (23)                |                      |         |           |                 |                | 40 (11):26 (6):28 (6)            |                                                      |                  |
| Higher GI                                | 32              |                    | 30.2 (8.5)        | 87.7 (16.4)                         | 31.3 (4.5)                                  | 59 (6):75 (17)                |                      |         |           |                 |                | 42 (6):28 (6):27 (6)             |                                                      |                  |
| Wolever et al. 2002                      | 24 (5M:19F)**   | IGT, OP            |                   |                                     |                                             |                               |                      | NR      | Canada    | P               | Neutral        | 16                               | Ad libitum, partial provision                        | Agency           |
| Low GI                                   | 13(3M:10F)      |                    | 55.2 (10.8)       | 79.7 (13.1)***                      | 29.7 (4.3)                                  | 54.4 (2.5):91.8 (9.4)         |                      |         |           |                 |                | 54.8 (6.1):19.4 (1.8):24.7 (5.8) |                                                      |                  |
| Higher GI                                | 11(2M:9F)       |                    | 58.8 (13.3)       | 76.4 (20.4)***                      | 29.3 (7.3)                                  | 59.3 (2.0):96.8 (11.6)        |                      |         |           |                 |                | 52.8 (6.6):17.4 (2.3):27.9 (6.3) |                                                      |                  |



Supplement Table S4d: Trial characteristics continued

| Diabetes Trials     |                |                    |                   |                                     |                                             |                               |                      |         |                |                 |                |                                  |                      |                                                         |
|---------------------|----------------|--------------------|-------------------|-------------------------------------|---------------------------------------------|-------------------------------|----------------------|---------|----------------|-----------------|----------------|----------------------------------|----------------------|---------------------------------------------------------|
| Study               | Subjects       | Sample Description | Mean Age (y) (SD) | Mean Baseline Body Weight (kg) (SD) | Mean Baseline BMI (kg/m <sup>2</sup> ) (SD) | Mean GI:GL of diet (SD) ¶ ¶ ¶ | Pasta Dose (serv/wk) | Setting | Design         | Energy Balance§ | Duration (wks) | Diet Composition % (SD)§§        | Dietary Prescription | Funding Source                                          |
| Jenkins et al. 2014 | 141(77M:64F)   | T2DM, OP           |                   |                                     |                                             |                               |                      | NR      | Canada         | P               | Neutral        | 12                               |                      | Ad libitum, bread supplement<br>Industry Association    |
| Low GI              | 70 (38M:32F)   |                    | 59 (10)           | 85 (20)                             | 30 (5)                                      | ~51:53                        |                      |         |                |                 |                | ~38.5:19.8:37.2                  |                      |                                                         |
| Higher GI           | 71 (39M:32F)   |                    | 59 (10)           | 84 (19)                             | 31 (6)                                      | ~62:89                        |                      |         |                |                 |                | ~49.2:19.8:27.4                  |                      |                                                         |
| Visek et al. 2014   | 20 (12M:8F)    | T2DM, OP           | 62.7 (5.8)        | 91.9 (14.1)                         | 32 (4.2)                                    |                               |                      | NR      | Czech Republic | C               | Neutral        | 12                               |                      | Ad libitum<br>Agency                                    |
| Low GI              |                |                    |                   |                                     |                                             | 49 (48-51)¶¶¶                 |                      |         |                |                 |                | ~37.2:18.0:36.0                  |                      |                                                         |
| Higher GI           |                |                    |                   |                                     |                                             | 68 (61-72)¶¶¶                 |                      |         |                |                 |                | ~36.2:17.3:40.0                  |                      |                                                         |
| Jenkins et al. 2012 | 121 (61M: 60F) | T2DM, OP           |                   |                                     |                                             |                               |                      | NR      | Canada         | P               | Neutral        | 12                               |                      | Ad libitum<br>Agency                                    |
| Low GI              | 60             |                    | 58 (10.1)         | 85.6 (20.1)                         | 31.4 (7.0)                                  | 47: 80                        |                      |         |                |                 |                | 45.4:22.8:30.5                   |                      |                                                         |
| Higher GI           | 61             |                    | 61 (7.8)          | 82.5 (17.2)                         | 29.9 (5.5)                                  | 58: 100                       |                      |         |                |                 |                | 48.3:21.4:28.5                   |                      |                                                         |
| Yusof et al. 2009   | 100**          | T2DM, OP           | NR                |                                     |                                             |                               |                      | NR      | Malaysia       | P               | Neutral        | 12                               |                      | Ad libitum, key foods provided to lowGI group<br>Agency |
| Low GI              | 51             |                    |                   | 69.12 (13.33)                       | 27.05 (4.91)                                | 57(6): 108(32)                |                      |         |                |                 |                | 52(4):18(3):30(4)                |                      |                                                         |
| Higher GI           | 49             |                    |                   | 66.83 (11.50)                       | 26.79 (4.65)                                | 64(5): 131(30)                |                      |         |                |                 |                | 54(4):17(3):28(5)                |                      |                                                         |
| Jenkins et al 2008  | 210 (125M:82F) | T2DM, OP           |                   |                                     |                                             |                               |                      | NR      | Canada         | P               | Neutral        | 24                               |                      | Ad libitum<br>Agency                                    |
| Low GI              | 106 (65M:41F)  |                    | 60 (10)           | 87.0 (20.0)                         | 30.6 (6.0)                                  | 49.4: 91.5                    |                      |         |                |                 |                | 44.0:21.2:33.3                   |                      |                                                         |
| Higher GI           | 104 (63M:41F)  |                    | 61 (9)            | 87.8 (19.4)                         | 31.2 (5.8)                                  | 59.3: 117.9                   |                      |         |                |                 |                | 47.5:20.7:30.5                   |                      |                                                         |
| Wolever et al. 2008 | 103            | T2DM, OW/OB, OP    |                   |                                     |                                             |                               |                      | NR      | Canada         | P               | Neutral        | 52                               |                      | Ad libitum, key foods provided<br>Agency                |
| Low GI              | 55             |                    | 60.6 (7.5)*       | 81.1 (18.7)*                        | 31.6 (4.5)*                                 | 55.1 (3.0): 133 (14.8)        |                      |         |                |                 |                | 51.9 (6.7):20.6(3.0):26.5 (5.9)  |                      |                                                         |
| Higher GI           | 48             |                    | 60.4 (7.9)*       | 84.4(18.0)*                         | 30.1 (4.3)*                                 | 63.2 (2.8): 135 (20.8)        |                      |         |                |                 |                | 46.5 (6.2):20.4 (2.8):30.8 (4.8) |                      |                                                         |

Supplement Table S4e: Trial characteristics continued

| Diabetes Trials continued |                |                    |                   |                                     |                                             |                              |                      |         |           |                 |                |                                  |                      |                                                |                  |
|---------------------------|----------------|--------------------|-------------------|-------------------------------------|---------------------------------------------|------------------------------|----------------------|---------|-----------|-----------------|----------------|----------------------------------|----------------------|------------------------------------------------|------------------|
| Study                     | Subjects       | Sample Description | Mean Age (y) (SD) | Mean Baseline Body Weight (kg) (SD) | Mean Baseline BMI (kg/m <sup>2</sup> ) (SD) | Mean GI:GL of diet (SD) ¶¶¶¶ | Pasta Dose (serv/wk) | Setting | Design    | Energy Balance§ | Duration (wks) | Diet Composition % (SD)§§        | Dietary Prescription | Funding Source                                 |                  |
| Jimenez-Cruz et al. 2003  | 14 (6M:8F)**   | T2DM, OP           | 59 (34)           |                                     |                                             |                              |                      | NR      | Mexico    | C               | Neutral        | 6                                |                      | Ad libitum                                     | Industry         |
| Low GI                    |                |                    |                   | 91.6 (24.3)                         | 32.4 (6.0)                                  | 44(3.4): 86(19.8)            |                      |         |           |                 |                | 60:21:23                         |                      |                                                |                  |
| Higher GI                 |                |                    |                   | 92.6 (25.4)                         | 32.3 (6.0)                                  | 56(4.9): 139(27.3)           |                      |         |           |                 |                | 64:18:20                         |                      |                                                |                  |
| Heilbronn et al. 2002     | 45 (23M:22F)** | T2DM, OW, OP       |                   |                                     |                                             |                              |                      | 3.5     | Australia | P               | Negative       | 8                                |                      | CR to1500kcal/d; Ad libitum, partial provision | Unknown          |
| Low GI                    | 24 (11M:13F)   |                    | 56.0(9.4)         | 91.7(16.2)                          |                                             | 43                           |                      |         |           |                 |                | 58.9 (2.9):22.2 (1.5):17.9 (3.9) |                      |                                                |                  |
| Higher GI                 | 21 (12M:9F)    |                    | 57.5(9.6)         | 93.2 (13.3)                         |                                             | 75                           |                      |         |           |                 |                | 60.8 (2.3):21.7 (0.9):17.1 (2.3) |                      |                                                |                  |
| Fontvieille et al. 1992   | 18 (12M:6F)    | T1DM/T2DM, OP      | 47.2(11.6)        |                                     | 24.8(2.6)                                   |                              |                      | 4.7     | France    | C               | Neutral        | 5                                |                      | Ad libitum                                     | Agency, Industry |
| Low GI                    |                |                    |                   |                                     |                                             | 38.1(5.3)                    |                      |         |           |                 |                | 45.8(7.2):18.0(2.5):36.2(6.8)    |                      |                                                |                  |
| Higher GI                 |                |                    |                   |                                     |                                             | 64.2(3.1)                    |                      |         |           |                 |                | 44.9(7.3):18.8(1.6):36.3(6.0)    |                      |                                                |                  |
| Fontvieille et al. 1988   | 8 (4M:4F)      | T1DM, OP           | 43.5 (9.9)        |                                     | 24.1 (6.8)                                  |                              |                      | 3.5     | France    | C               | Neutral        | 3                                |                      | Ad libitum, partial provision                  | Agency, Industry |
| Low GI                    |                |                    |                   |                                     |                                             | 46.5(2.5)                    |                      |         |           |                 |                | 46.1 (4.5):17.4 (1.4):35.0 (2.8) |                      |                                                |                  |
| Higher GI                 |                |                    |                   |                                     |                                             | 60.1 (5.1)                   |                      |         |           |                 |                | 45.4 (4.5):16.9 (1.7):36.0 (2.8) |                      |                                                |                  |
| <b>CHD Trial</b>          |                |                    |                   |                                     |                                             |                              |                      |         |           |                 |                |                                  |                      |                                                |                  |
| Frost et al. 2004         | 55 (48M:7F)**  | CHD, OP            |                   |                                     |                                             |                              |                      | NR      | UK        | P               | Neutral §§§    | 12                               |                      | Ad Libitum                                     | Unknown          |
| Low GI                    | 26 (23M:3F)    |                    | 63.6 (9.4)        | 81.2 (12.2)                         | 26.9 (3.3)                                  | 50(4):115(39)                |                      |         |           |                 |                | 49 (5):18 (5):31 (5)             |                      |                                                |                  |
| Higher GI                 | 29 (25M:4F)    |                    | 61.8 (9)          | 81.7 (16.7)                         | 28.7 (4.6)                                  | 57(4):106(34)                |                      |         |           |                 |                | 47 (10):18 (5):32 (10)           |                      |                                                |                  |

Abbreviations: BMI=Body Mass Index; C=Crossover design; Carb=Carbohydrate; CED= carbohydrate exchange diet; CHD= Coronary Heart Disease; CR= calorie restriction; CV=cardiovascular; GI= glycemic index; GL=glycemic load; IGT= impaired glucose tolerance; IP=inpatient; IR= insulin resistant; High Carb= high carbohydrate; HI= hyperinsulinemic; M = male; mo=months; MUFA=monounsaturated fatty acids; na=not available; T1DM=type 1 diabetes mellitus; T2DM = type 2 diabetes mellitus; OB= obese; OH=otherwise healthy; OP = outpatient; OW= overweight; P=Parallel design; SD= standard deviation; F = female; UK= United Kingdom; USA= United States of America; wks=weeks; y= years

§Negative energy balance diets were designed for weight loss, Neutral energy balance diets for weight maintenance, where all diets are isocaloric between test and control groups; §§Energy from carbohydrate: protein: fat for the planned diet or if not planned; §§§ Participants were advised to lose weight if they had a BMI>28kg/m2.

¶ Range of values; ¶¶ median and interquartile range (IQR); ¶¶¶ Actual GI/GL or if not available, planned;

\* Calculated before dropout; \*\*Completer Analysis, as used in data analysis; \*\*\* completer analysis, data obtained from authors; \*\*\*\* based on less participants than in analysis;

+ approximate based on all study arms; ¥ approximate based on test meals; ‡ approximate based on n=45 from Sloth et al. 2004, the original publication of this study;

‡‡‡ analysis includes weight loss and weight maintenance phases

**Supplemental Table S5: Sensitivity analysis of the systematic removal of each trial\***

|                              | MD [95% CI], P-value<br>I <sup>2</sup> , P-value |                                                  |                                                |                                               |                                                 |                                                 |
|------------------------------|--------------------------------------------------|--------------------------------------------------|------------------------------------------------|-----------------------------------------------|-------------------------------------------------|-------------------------------------------------|
|                              | Body Weight (kg)<br>N=32                         | BMI (kg/m <sup>2</sup> )<br>N=18                 | Body Fat (%)<br>N=10                           | Waist<br>Circumference<br>(cm)<br>N=18        | Waist-to-hip Ratio<br>N=6                       | Sagittal Abdominal<br>Diameter (cm)<br>N=3      |
| All studies                  | -0.63 [-0.84, -0.42],<br>P<0.01<br>0.00%, P=0.51 | -0.26 [-0.36, -0.16],<br>P<0.01<br>0.00%, P=0.91 | -0.01 [-0.58, 0.56],<br>P=0.98<br>65%, P=0.003 | -0.46 [-1.05, 0.14],<br>P=0.13<br>62%, P<0.01 | -0.00 [-0.01, 0.00],<br>P=0.27<br>0.00%, P=0.52 | -0.09 [-0.34, 0.16],<br>P=0.48<br>0.00%, P=0.92 |
| <b>Removal of:</b>           |                                                  |                                                  |                                                |                                               |                                                 |                                                 |
| OW/OB                        |                                                  |                                                  |                                                |                                               |                                                 |                                                 |
| Pereira et al. 2015          | -0.61 [-0.82, -0.39],<br>P<0.01<br>0.00%, P=0.54 | -0.24 [-0.34, -0.14],<br>P<0.01<br>0.00%, P=0.93 | 0.19 [-0.25, 0.63],<br>P=0.39<br>36%, P=0.13   | -0.37 [-1.04, 0.31],<br>P=0.28<br>62%, P<0.01 | -0.00 [-0.01, 0.01],<br>P=0.67<br>0.00%, P=0.58 | n/a                                             |
| Karl et al. 2015             | -0.62 [-0.83, -0.41],<br>P<0.01<br>0.00%, P=0.50 | -0.25 [-0.35, -0.16],<br>P<0.01<br>0.00%, P=0.91 | 0.10 [-0.51, 0.71],<br>P=0.74<br>64%, P<0.01   | n/a                                           | n/a                                             | n/a                                             |
| Buscemi et al. 2013          | -0.63 [-0.84, -0.42],<br>P<0.01<br>0.00%, P=0.46 | -0.26 [-0.36, -0.16],<br>P<0.01<br>0.00%, P=0.86 | -0.08 [-0.63, 0.48],<br>P=0.79<br>64%, P<0.01  | -0.46 [-1.06, 0.15],<br>P=0.14<br>64%, P<0.01 | n/a                                             | n/a                                             |
| Costa et al. 2012            | -0.62 [-0.84, -0.41],<br>P<0.01<br>0.00%, P=0.46 | -0.26 [-0.37, -0.16],<br>P<0.01<br>0.00%, P=0.86 | -0.06 [-0.73, 0.61],<br>P=0.86<br>66%, P<0.01  | -0.33 [-0.94, 0.28],<br>P=0.29<br>59%, P<0.01 | n/a                                             | n/a                                             |
| Jebb et al. 2010 - LowFat    | -0.63 [-0.84, -0.42],<br>P<0.01<br>0.00%, P=0.46 | n/a                                              | n/a                                            | n/a                                           | n/a                                             | n/a                                             |
| Larsen et al. 2010 - LowPro  | -0.60 [-0.81, -0.38],<br>P<0.01<br>0.00%, P=0.57 | n/a                                              | n/a                                            | -0.45 [-1.09, 0.18],<br>P=0.16<br>64%, P<0.01 | n/a                                             | -0.05 [-0.39, 0.29],<br>P=0.79<br>0.00%, P=0.86 |
| Jebb et al. 2010- HighMUFA   | -0.64 [-0.85, -0.43],<br>P<0.01<br>0.00%, P=0.65 | n/a                                              | n/a                                            | n/a                                           | n/a                                             | n/a                                             |
| Larsen et al. 2010 - HighPro | -0.62 [-0.83, -0.41],<br>P<0.01<br>0.00%, P=0.48 | n/a                                              | n/a                                            | -0.37 [-1.00, 0.26],<br>P=0.26<br>62%, P<0.01 | n/a                                             | -0.13 [-0.45, 0.19],<br>P=0.42<br>0.00%, P=0.92 |
| Solomon et al. 2010          | -0.63 [-0.84, -0.42],<br>P<0.01                  | -0.26 [-0.36, -0.16],<br>P<0.01                  | n/a                                            | n/a                                           | n/a                                             | n/a                                             |

|                                      |                                                  |                                                  |                                               |                                                            |                                                 |                                                 |
|--------------------------------------|--------------------------------------------------|--------------------------------------------------|-----------------------------------------------|------------------------------------------------------------|-------------------------------------------------|-------------------------------------------------|
|                                      | 0.00%, P=0.47                                    | 0.00%, P=0.88                                    |                                               |                                                            |                                                 |                                                 |
| Philippou et al. 2009 - 6mth         | -0.65 [-0.86, -0.44],<br>P<0.01<br>0.00%, P=0.59 | -0.28 [-0.37, -0.18],<br>P<0.01<br>0.00%, P=0.97 | -0.12 [-0.71, 0.48],<br>P=0.70<br>65%, P<0.01 | -0.55 [-1.15, 0.04],<br>P=0.07<br>61%, P<0.01              | n/a                                             | n/a                                             |
| Philippou et al. 2009 - 4mth         | -0.61 [-0.83, -0.40],<br>P<0.01<br>0.00%, P=0.48 | -0.25 [-0.35, -0.15],<br>P<0.01<br>0.00%, P=0.89 | -0.09 [-0.72, 0.54],<br>P=0.78<br>66%, P<0.01 | -0.44 [-1.08, 0.19],<br>P=0.17<br>64%, P<0.01              | n/a                                             | n/a                                             |
| Abete et al. 2008                    | -0.63 [-0.84, -0.42],<br>P<0.01<br>0.00%, P=0.47 | n/a                                              | n/a                                           | n/a                                                        | n/a                                             | n/a                                             |
| Philippou et al. 2008                | -0.62 [-0.83, -0.42],<br>P<0.01<br>0.00%, P=0.48 | -0.26 [-0.35, -0.16],<br>P<0.01<br>0.00%, P=0.89 | -0.06 [-0.68, 0.55],<br>P=0.84<br>68%, P<0.01 | -0.41 [-1.02, 0.19],<br>P=0.18<br>63%, P<0.01              | n/a                                             | n/a                                             |
| Aston et al. 2008                    | -0.66 [-0.87, -0.44],<br>P<0.01<br>0.00%, P=0.52 | n/a                                              | -0.00 [-0.70, 0.69],<br>P=0.99<br>68%, P<0.01 | -0.54 [-1.14, 0.07],<br>P=0.08<br>62%, P<0.01              | n/a                                             | n/a                                             |
| Jensen et al. 2008                   | -0.63 [-0.84, -0.42],<br>P<0.01<br>0.00%, P=0.46 | -0.27 [-0.36, -0.17],<br>P<0.01<br>0.00%, P=0.88 | n/a                                           | -0.44 [-1.05, 0.18],<br>P=0.16<br>64%, P<0.01              | -0.00 [-0.01, 0.00],<br>P=0.24<br>0.00%, P=0.41 | -0.09 [-0.35, 0.18],<br>P=0.51<br>0.00%, P=0.69 |
| de Rougemont et al. 2007             | -0.57 [-0.80, -0.34],<br>P<0.01<br>0.00%, P=0.53 | -0.25 [-0.36, -0.14],<br>P<0.01<br>0.00%, P=0.87 | 0.06 [-0.57, 0.70],<br>P=0.84<br>67%, P<0.01  | n/a                                                        | n/a                                             | n/a                                             |
| Sichieri et al. 2007                 | -0.66 [-0.88, -0.45],<br>P<0.01<br>0.00%, P=0.53 | n/a                                              | n/a                                           | n/a                                                        | n/a                                             | n/a                                             |
| Bellisle et al. 2007                 | -0.63 [-0.84, -0.42],<br>P<0.01<br>0.00%, P=0.47 | -0.26 [-0.36, -0.16],<br>P<0.01<br>0.00%, P=0.88 | n/a                                           | -0.47 [-1.08, 0.13],<br>P=0.13<br>64%, P<0.01              | -0.00 [-0.01, 0.00],<br>P=0.14<br>0.00%, P=0.70 | n/a                                             |
| McMillan-Price et al. 2006 - HighCHO | -0.61 [-0.82, -0.39],<br>P<0.01<br>0.00%, P=0.51 | n/a                                              | n/a                                           | -0.38 [-1.01, 0.25],<br>P=0.23<br>63%, P<0.01              | n/a                                             | n/a                                             |
| McMillan-Price et al. 2006 - HighPro | -0.70 [-0.91, -0.49],<br>P<0.01<br>0.00%, P=0.91 | n/a                                              | n/a                                           | <b>-0.62 [-1.19, -0.05],<br/>P=0.03<br/>55%, P&lt;0.01</b> | n/a                                             | n/a                                             |
| Wolever et al. 2002                  | -0.63 [-0.84, -0.42],<br>P<0.01<br>0.00%, P=0.46 | n/a                                              | n/a                                           | n/a                                                        | n/a                                             | n/a                                             |
| Diabetes:                            |                                                  |                                                  |                                               |                                                            |                                                 |                                                 |
| Visek et al. 2014                    | -0.63 [-0.84, -0.42],<br>P<0.01                  | -0.26 [-0.36, -0.16],<br>P<0.01                  | 0.01 [-0.57, 0.60],<br>P=0.96                 | n/a                                                        | n/a                                             | n/a                                             |

1  
2  
3  
4  
5  
6  
7  
8  
9  
10  
11  
12  
13  
14  
15  
16  
17  
18  
19  
20  
21  
22  
23  
24  
25  
26  
27  
28  
29  
30  
31  
32  
33  
34  
35  
36  
37  
38  
39  
40  
41  
42  
43  
44  
45  
46  
47

|                          |                                                  |                                                  |             |                                                         |                                                 |     |
|--------------------------|--------------------------------------------------|--------------------------------------------------|-------------|---------------------------------------------------------|-------------------------------------------------|-----|
|                          | 0.00%, P=0.46                                    | 0.00%, P=0.86                                    | 68%, P<0.01 |                                                         |                                                 |     |
| Jenkins et al. 2014      | -0.66 [-0.88, -0.43],<br>P<0.01<br>0.00%, P=0.47 | -0.29 [-0.39, -0.18],<br>P<0.01<br>0.00%, P=0.94 | n/a         | <b>-0.61 [-1.18, -0.04],<br/>P=0.04<br/>50%, P=0.01</b> | -0.00 [-0.01, 0.00],<br>P=0.21<br>0.00%, P=0.43 | n/a |
| Jenkins et al. 2012      | -0.62 [-0.84, -0.40],<br>P<0.01<br>0.00%, P=0.46 | -0.25 [-0.35, -0.15],<br>P<0.01<br>0.00%, P=0.87 | n/a         | -0.44 [-1.05, 0.17],<br>P=0.16<br>64%, P<0.01           | -0.00 [-0.01, 0.01],<br>P=0.64<br>0.00%, P=0.53 | n/a |
| Yusof et al. 2009        | -0.63 [-0.84, -0.42],<br>P<0.01<br>0.00%, P=0.46 | -0.26 [-0.36, -0.16],<br>P<0.01<br>0.00%, P=0.87 | n/a         | -0.33 [-0.95, 0.28],<br>P=0.29<br>58%, P<0.01           | n/a                                             | n/a |
| Jenkins et al. 2008      | -0.61 [-0.83, -0.40],<br>P<0.01<br>0.00%, P=0.48 | -0.25 [-0.36, -0.15],<br>P<0.01<br>0.00%, P=0.87 | n/a         | n/a                                                     | n/a                                             | n/a |
| Wolever et al. 2008      | -0.64 [-0.84, -0.43],<br>P<0.01<br>0.00%, P=0.57 | n/a                                              | n/a         | -0.50 [-1.10, 0.09],<br>P=0.10<br>62%, P<0.01           | n/a                                             | n/a |
| Jimenez-Cruz et al. 2003 | -0.63 [-0.84, -0.42],<br>P<0.01<br>0.00%, P=0.46 | -0.26 [-0.35, -0.16],<br>P<0.01<br>0.00%, P=0.86 | n/a         | n/a                                                     | n/a                                             | n/a |
| Heilbronn et al. 2002    | -0.63 [-0.84, -0.42],<br>P<0.01<br>0.00%, P=0.47 | n/a                                              | n/a         | n/a                                                     | n/a                                             | n/a |
| Fontvieille et al. 1992  | -0.63 [-0.84, -0.42],<br>P<0.01<br>0.00%, P=0.46 | n/a                                              | n/a         | n/a                                                     | n/a                                             | n/a |
| Fontvielle et al. 1988   | -0.63 [-0.84, -0.42],<br>P<0.01<br>0.00%, P=0.46 | n/a                                              | n/a         | n/a                                                     | n/a                                             | n/a |
| <b>CHD</b>               |                                                  |                                                  |             |                                                         |                                                 |     |
| Frost et al. 2004        | -0.63 [-0.84, -0.42],<br>P<0.01<br>0.00%, P=0.47 | -0.26 [-0.36, -0.17],<br>P<0.01<br>0.00%, P=0.89 | n/a         | -0.48 [-1.09, 0.12],<br>P=0.12<br>63%, P<0.01           | -0.00 [-0.01, 0.00],<br>P=0.25<br>1%, P=0.40    | n/a |

\*Sensitivity analysis included the removal of each single study from the meta-analyses one at a time and the summary effect was recalculated. An influential outlier was considered a study whose removal changed the magnitude of the pooled effect by >10%.

BMI, body mass index; CHD, coronary heart disease; CHO, carbohydrate; CI, confidence interval; MD, mean difference; mnth, month; MUFA, monounsaturated fatty acids; n/a, not applicable; OB, obese; OW, overweight; Pro, protein

**Supplemental Table S6: Sensitivity analyses of the use of correlation coefficients of 0.25 and 0.75 for crossover trials**

| Outcome (no. crossover trials/total)  | MD (95% CI), P-value<br>I <sup>2</sup> , P-value        |                                                         |                                               |
|---------------------------------------|---------------------------------------------------------|---------------------------------------------------------|-----------------------------------------------|
|                                       | Correlation Coefficient<br>used in the Primary Analysis | Correlation Coefficient used in<br>Sensitivity Analyses |                                               |
|                                       | 0.5                                                     | 0.25                                                    | 0.75                                          |
| Body Weight, kg (6*/32)               | -0.63 [-0.84, -0.42], P<0.01<br>0.00%, P=0.51           | -0.63 [-0.84, -0.42], P<0.01<br>0.00%, P=0.51           | -0.63 [-0.84, -0.43], P<0.01<br>0.00%, P=0.51 |
| BMI, kg/m <sup>2</sup> (3/18)         | -0.26 [-0.36, -0.16], P<0.01<br>0.00%, P=0.91           | -0.26 [-0.36, -0.16], P<0.01<br>0.00%, P=0.90           | -0.26 [-0.35, -0.17], P<0.01<br>0.00%, P=0.90 |
| Body Fat, % (3*/10)                   | -0.01 [-0.58, 0.56], P=0.98<br>65%, P<0.01              | -0.00 [-0.58, 0.58], P=0.99<br>64%, P<0.01              | -0.02 [-0.57, 0.54], P=0.96<br>66%, P<0.01    |
| Waist Circumference, cm (2*/18)       | -0.46 [-1.05, 0.14], P=0.13<br>62%, P<0.01              | -0.44 [-1.04, 0.15], P=0.14<br>60%, P<0.01              | -0.46 [-1.07, 0.14], P=0.13<br>65%, P<0.01    |
| Waist-to-hip Ratio (0/6)              | -0.00 [-0.01, 0.00], P=0.27<br>0.00%, P=0.52            | n/a                                                     | n/a                                           |
| Sagittal Abdominal Diameter, cm (0/6) | -0.09 [-0.34, 0.16], P=0.48<br>0.00%, P=0.92            | n/a                                                     | n/a                                           |

\* one of these crossover trials, however, did not require the use of a correlation coefficient as complete data was available

BMI, body mass index; CI, confidence interval; MD, mean difference; no., number

**Supplement Table S7. Continuous meta-regression analysis for the effect of pasta in the context of low-GI dietary patterns on body weight (kg)<sup>1</sup>**

| Subgroup                                 | Range                         | No. trials | N    | $\beta$ (95% CI)     | Residual I <sup>2</sup> | P value      |
|------------------------------------------|-------------------------------|------------|------|----------------------|-------------------------|--------------|
| Baseline BMI                             | 24.1 – 37.1 kg/m <sup>2</sup> | 32         | 2448 | -0.04 (-0.13, 0.06)  | 0.00%                   | 0.454        |
| Follow-up                                | 3 – 72 wks                    | 32         | 2448 | 0.01 (-0.01, 0.02)   | 0.00%                   | 0.314        |
| Dose Pasta                               | 1.75 – 7.0 serv/wk            | 11         | 740  | 0.29 (-0.91, 1.50)   | 0.00%                   | 0.595        |
| GI <sup>3</sup>                          | 21 - 72                       | 31         | 2383 | -0.01 (-0.04, 0.02)  | 0.45%                   | 0.482        |
| Difference in GI <sup>2</sup>            | 4.9 - 40.2                    | 31         | 2383 | -0.00 (-0.04, 0.03)  | 2.75%                   | 0.811        |
| Fiber <sup>3</sup>                       | 8.0 - 39.4g/d                 | 27         | 1851 | 0.02 (-0.01, 0.06)   | 0.00%                   | 0.221        |
| Change in Fiber <sup>4</sup>             | -7.5 - +13.8g/d               | 17         | 1571 | -0.02 (-0.07, 0.04)  | 23.13%                  | 0.595        |
| Difference in Fiber <sup>2</sup>         | -8.5 - +15.3g/d               | 27         | 1851 | -0.01 (-0.06, 0.04)  | 0.00%                   | 0.701        |
| Saturated Fat <sup>3</sup>               | 5.1 - 12.5%                   | 14         | 1396 | -0.05 (-0.30, 0.20)  | 34.32%                  | 0.648        |
| Change in Saturated Fat <sup>4</sup>     | -8.2 - -1.2%                  | 12         | 1309 | -0.01 (-0.29, 0.28)  | 46.27%                  | 0.965        |
| Difference in Saturated Fat <sup>2</sup> | -2.0 - +2.3%                  | 14         | 1396 | -0.34 (-1.08, 0.39)  | 32.80%                  | 0.329        |
| CHO <sup>3</sup>                         | 37.2 - 68.0%                  | 30         | 2345 | -0.01 (-0.05, 0.03)  | 0.00%                   | 0.541        |
| Change in CHO <sup>4</sup>               | -7.2 - +10.1%                 | 19         | 2046 | -0.07 (-0.12, -0.01) | 0.00%                   | <b>0.016</b> |
| Difference in CHO <sup>2</sup>           | -11.1 - +5.4%                 | 30         | 2345 | 0.02 (-0.05, 0.10)   | 0.00%                   | 0.547        |
| Protein <sup>3</sup>                     | 13.3 - 26.1%                  | 30         | 2345 | 0.04 (-0.04, 0.12)   | 0.00%                   | 0.332        |

|                                    |               |    |      |                     |        |              |
|------------------------------------|---------------|----|------|---------------------|--------|--------------|
| Change in Protein <sup>4</sup>     | -0.5 - +8.6%  | 19 | 2046 | 0.15 (0.03, 0.27)   | 0.00%  | <b>0.017</b> |
| Difference in Protein <sup>2</sup> | -2.5 - +3.4%  | 30 | 2345 | -0.18 (-0.38, 0.02) | 0.00%  | 0.069        |
| Fat <sup>3</sup>                   | 16.0 - 37.7%  | 30 | 2345 | 0.01 (-0.05, 0.06)  | 0.00%  | 0.852        |
| Change in Fat <sup>4</sup>         | -12.2 - +5.4% | 19 | 2046 | 0.05 (-0.02, 0.12)  | 17.73% | 0.122        |
| Difference in Fat <sup>2</sup>     | -4.4 - +10.6% | 30 | 2345 | 0.02 (-0.05, 0.09)  | 0.00%  | 0.610        |

1 Data is presented as between group mean difference (95% CI) for a 1-unit change in the predictor variable.  $\beta$ -coefficients were estimated using continuous meta-regression analysis. A positive  $\beta$ -coefficient implies an increase in body weight on the pasta/low-GI intervention as the subgroup variable increases, and a negative  $\beta$ -coefficient implies a decrease in body weight. Residual  $I^2$  reports inter-study heterogeneity not explained by the subgroup and was estimated using the Cochran's Q statistic.

2 Difference in diet variable between the intervention and control arms

3 Intake at the end of study in the intervention arm

4 Change in intake from end of study from baseline in intervention arm

BMI, body mass index; CHO, carbohydrate; GI, glycemic index



**Supplemental Table S8. Continuous meta-regression analysis for the effect of pasta in the context of low-GI dietary patterns on BMI (kg/m<sup>2</sup>)<sup>1</sup>**

| Subgroup                                  | Range                         | No. trials | N    | $\beta$ (95% CI)    | Residual I <sup>2</sup> | P value |
|-------------------------------------------|-------------------------------|------------|------|---------------------|-------------------------|---------|
| Baseline BMI                              | 26.3 – 37.1 kg/m <sup>2</sup> | 18         | 1038 | -0.01 (-0.06, 0.03) | 0.00%                   | 0.559   |
| Follow-up                                 | 4 – 24 wks                    | 18         | 1038 | 0.00 (-0.01, 0.02)  | 0.00%                   | 0.559   |
| Dose Pasta*                               | 2.33 – 7.0 serv/wk            | 4          | 143  |                     |                         |         |
| GI <sup>3</sup>                           | 39.8 - 72                     | 17         | 973  | 0.01 (-0.01, 0.03)  | 0.00%                   | 0.153   |
| Difference in GI <sup>2</sup>             | 7.0 - 40.2                    | 17         | 973  | -0.01 (-0.03, 0.01) | 0.00%                   | 0.275   |
| Fiber <sup>3</sup>                        | 8.0 - 39.4g/d                 | 16         | 935  | 0.01 (-0.01, 0.02)  | 0.00%                   | 0.366   |
| Change in Fiber <sup>4</sup>              | -1.8 - +12.4g/d               | 10         | 758  | 0.00 (-0.03, 0.03)  | 0.00%                   | 0.846   |
| Difference in Fiber <sup>2</sup>          | -4.9 - +13.0g/d               | 16         | 935  | -0.00 (-0.02, 0.02) | 0.00%                   | 0.821   |
| Saturated Fat* <sup>3</sup>               | 7.6 - 12.5%                   | 7          |      |                     |                         |         |
| Change in Saturated Fat* <sup>4</sup>     | -2.4 - -1.2%                  | 6          |      |                     |                         |         |
| Difference in Saturated Fat* <sup>2</sup> | -1.0 - +2.3%                  | 7          |      |                     |                         |         |
| CHO <sup>3</sup>                          | 37.2 - 68.0%                  | 16         | 935  | -0.00 (-0.02, 0.01) | 0.00%                   | 0.594   |
| Change in CHO <sup>4</sup>                | -5.6 - +3.2%                  | 10         | 758  | -0.02 (-0.06, 0.02) | 0.00%                   | 0.325   |
| Difference in CHO <sup>2</sup>            | -11.1 - +2.0%                 | 16         | 935  | -0.01 (-0.03, 0.02) | 0.00%                   | 0.531   |
| Protein <sup>3</sup>                      | 13.9 – 22.8%                  | 16         | 935  | 0.00 (-0.04, 0.04)  | 0.00%                   | 0.905   |

|                                    |               |    |     |                     |       |       |
|------------------------------------|---------------|----|-----|---------------------|-------|-------|
| Change in Protein <sup>4</sup>     | -0.2 - +3.0%  | 10 | 758 | 0.01 (-0.11, 0.14)  | 0.00% | 0.786 |
| Difference in Protein <sup>2</sup> | -2.5 - +3.4%  | 16 | 935 | -0.03 (-0.12, 0.06) | 0.00% | 0.441 |
| Fat <sup>3</sup>                   | 16.0 - 37.7%  | 16 | 935 | 0.00 (-0.02, 0.02)  | 0.00% | 0.717 |
| Change in Fat <sup>4</sup>         | -4.8 - +5.4%  | 10 | 758 | 0.02 (-0.02, 0.06)  | 0.00% | 0.240 |
| Difference in Fat <sup>2</sup>     | -4.4 - +10.6% | 16 | 935 | 0.01 (-0.01, 0.04)  | 0.00% | 0.299 |

\*For Dose, there were <10 trials so subgroup analyses were not performed.

1 Data is presented as between group mean difference (95% CI) for a 1-unit change in the predictor variable.  $\beta$ -coefficients were estimated using continuous meta-regression analysis. A positive  $\beta$ -coefficient implies an increase in BMI on the pasta/low-GI intervention as the subgroup variable increases, and a negative  $\beta$ -coefficient implies a decrease in BMI. Residual  $I^2$  reports inter-study heterogeneity not explained by the subgroup and was estimated using the Cochran's Q statistic.

2 Difference in diet variable between the intervention and control arms

3 Intake at the end of study in the intervention arm

4 Change in intake from end of study from baseline in intervention arm

BMI, body mass index; CHO, carbohydrate; GI, glycemic index; wk, week

**Supplemental Table S9. Continuous meta-regression analysis for the effect of pasta in the context of low-GI dietary patterns on body fat (%)<sup>1</sup>**

| Subgroup                                  | Range                         | No. trials | N   | $\beta$ (95% CI)     | Residual I <sup>2</sup> | P value      |
|-------------------------------------------|-------------------------------|------------|-----|----------------------|-------------------------|--------------|
| Baseline BMI                              | 26.3 – 36.0 kg/m <sup>2</sup> | 10         | 285 | -0.02 (-0.26, 0.23)  | 67.69%                  | 0.890        |
| Follow-up                                 | 4 – 24 wks                    | 10         | 285 | 0.06 (-0.06, 0.17)   | 66.00%                  | 0.303        |
| Dose Pasta*                               | 2.33 - 3.33 serv/wk           | 3          | 96  |                      |                         |              |
| GI <sup>3</sup>                           | 39.8 - 72                     | 10         | 285 | 0.12 (-0.00, 0.25)   | 52.21%                  | 0.053        |
| Difference in GI <sup>2</sup>             | 7.0 - 40.2                    | 10         | 285 | -0.09 (-0.15, -0.03) | 19.39%                  | <b>0.008</b> |
| Fiber* <sup>3</sup>                       | 8.0 - 39.4g/d                 | 8          | 228 |                      |                         |              |
| Change in Fiber* <sup>4</sup>             | -1.8 - +12.4g/d               | 4          | 87  |                      |                         |              |
| Difference in Fiber* <sup>2</sup>         | -4.9 - +13.0g/d               | 8          | 228 |                      |                         |              |
| Saturated Fat* <sup>3</sup>               | 7.6 - 12.5%                   | 3          | 93  |                      |                         |              |
| Change in Saturated Fat* <sup>4</sup>     | -2.4 - -1.2%                  | 2          | 51  |                      |                         |              |
| Difference in Saturated Fat* <sup>2</sup> | -1.0 - +2.3%                  | 3          | 93  |                      |                         |              |
| CHO* <sup>3</sup>                         | 37.2 - 68.0%                  | 9          | 247 |                      |                         |              |
| Change in CHO* <sup>4</sup>               | -5.6 - +3.2%                  | 4          | 87  |                      |                         |              |
| Difference in CHO* <sup>2</sup>           | -11.1 - +2.0%                 | 9          | 247 |                      |                         |              |
| Protein* <sup>3</sup>                     | 13.9 – 22.8%                  | 9          | 247 |                      |                         |              |

|                                     |               |   |     |  |  |
|-------------------------------------|---------------|---|-----|--|--|
| Change in Protein* <sup>4</sup>     | -0.2 - +3.0%  | 4 | 87  |  |  |
| Difference in Protein* <sup>2</sup> | -2.5 - +3.4%  | 9 | 247 |  |  |
| Fat* <sup>3</sup>                   | 16.0 - 37.7%  | 9 | 247 |  |  |
| Change in Fat* <sup>4</sup>         | -4.8 - +5.4%  | 4 | 87  |  |  |
| Difference in Fat* <sup>2</sup>     | -4.4 - +10.6% | 9 | 247 |  |  |

\*There were <10 trials so subgroup analyses were not performed.

1 Data is presented as between group mean difference (95% CI) for a 1-unit change in the predictor variable.  $\beta$ -coefficients were estimated using continuous meta-regression analysis. A positive  $\beta$ -coefficient implies an increase in body fat on the pasta/low-GI intervention as the subgroup variable increases, and a negative  $\beta$ -coefficient implies a decrease in body fat. Residual  $I^2$  reports inter-study heterogeneity not explained by the subgroup and was estimated using the Cochran's Q statistic.

2 Difference in diet variable between the intervention and control arms

3 Intake at the end of study in the intervention arm

4 Change in intake from end of study from baseline in intervention arm

BMI, body mass index; CHO, carbohydrate; GI, glycemic index; wk, week

**Supplemental Table S10. Continuous meta-regression analysis for the effect of pasta in the context of low-GI dietary patterns on waist circumference (cm)<sup>1</sup>**

| Subgroup                                  | Range                         | No. trials | N    | $\beta$ (95% CI)     | Residual I <sup>2</sup> | P value      |
|-------------------------------------------|-------------------------------|------------|------|----------------------|-------------------------|--------------|
| Baseline BMI                              | 26.3 – 36.0 kg/m <sup>2</sup> | 18         | 1380 | 0.10 (-0.13, 0.32)   | 59.02%                  | 0.372        |
| Follow-up                                 | 4 – 52 wks                    | 18         | 1380 | 0.05 (-0.03, 0.13)   | 60.50%                  | 0.225        |
| Dose Pasta*                               | 3.0 – 3.33 serv/wk            | 2          | 63   |                      |                         |              |
| GI <sup>3</sup>                           | 41.2 – 72.0                   | 17         | 1315 | -0.01 (-0.12, 0.10)  | 66.00%                  | 0.841        |
| Difference in GI <sup>2</sup>             | 4.9 – 32.9                    | 17         | 1315 | -0.02 (-0.10, 0.06)  | 64.51%                  | 0.596        |
| Fiber <sup>3</sup>                        | 8.0 - 39.4g/d                 | 15         | 1258 | 0.05 (-0.05, 0.14)   | 59.60%                  | 0.342        |
| Change in Fiber <sup>4</sup>              | -1.8 - +13.8g/d               | 13         | 1176 | 0.01 (-0.17, 0.20)   | 70.59%                  | 0.861        |
| Difference in Fiber <sup>2</sup>          | -4.9 - +15.3g/d               | 15         | 1258 | -0.00 (-0.14, 0.13)  | 64.86%                  | 0.939        |
| Saturated Fat* <sup>3</sup>               | 6.1 – 10.1%                   | 8          | 604  |                      |                         |              |
| Change in Saturated Fat* <sup>4</sup>     | -7.6 - -1.2%                  | 7          | 562  |                      |                         |              |
| Difference in Saturated Fat* <sup>2</sup> | -2.0 - +2.3%                  | 8          | 604  |                      |                         |              |
| CHO <sup>3</sup>                          | 38.5 - 58.6%                  | 16         | 1277 | -0.11 (-0.19, -0.04) | 27.06%                  | <b>0.007</b> |
| Change in CHO <sup>4</sup>                | -7.2 - +10.1%                 | 13         | 1176 | -0.09 (-0.23, 0.04)  | 57.19%                  | 0.148        |
| Difference in CHO <sup>2</sup>            | -11.1 - +5.4%                 | 16         | 1277 | -0.01 (-0.18, 0.17)  | 60.81%                  | 0.947        |
| Protein <sup>3</sup>                      | 13.9 – 26.1%                  | 16         | 1277 | 0.20 (0.01, 0.38)    | 43.92%                  | <b>0.038</b> |

|                                    |               |    |      |                     |        |       |
|------------------------------------|---------------|----|------|---------------------|--------|-------|
| Change in Protein <sup>4</sup>     | -0.3 - +8.6%  | 13 | 1176 | 0.19 (-0.09, 0.46)  | 63.38% | 0.165 |
| Difference in Protein <sup>2</sup> | -2.5 - +3.4%  | 16 | 1277 | -0.14 (-0.66, 0.38) | 62.79% | 0.570 |
| Fat <sup>3</sup>                   | 22.0 - 37.2%  | 16 | 1277 | 0.10 (-0.05, 0.26)  | 53.48% | 0.185 |
| Change in Fat <sup>4</sup>         | -12.2 - +5.4% | 13 | 1176 | 0.08 (-0.07, 0.24)  | 61.15% | 0.274 |
| Difference in Fat <sup>2</sup>     | -4.4 - +10.6% | 16 | 1277 | 0.09 (-0.06, 0.25)  | 47.17% | 0.220 |

\*There were <10 trials so subgroup analyses were not performed.

1 Data is presented as between group mean difference (95% CI) for a 1-unit change in the predictor variable.  $\beta$ -coefficients were estimated using continuous meta-regression analysis. A positive  $\beta$ -coefficient implies an increase in waist circumference on the pasta/low-GI intervention as the subgroup variable increases, and a negative  $\beta$ -coefficient implies a decrease in waist circumference. Residual  $I^2$  reports inter-study heterogeneity not explained by the subgroup and was estimated using the Cochran's Q statistic.

2 Difference in diet variable between the intervention and control arms

3 Intake at the end of study in the intervention arm

4 Change in intake from end of study from baseline in intervention arm

BMI, body mass index; CHO, carbohydrate; GI, glycemic index; wk, week

**Supplementary Table S11. Post-hoc piecewise linear continuous dose-response meta-regression analyses for the effect of pasta intake in the context of low-GI dietary patterns on body weight (kg)**

| <b>Dose threshold of servings of pasta consumed per week</b> | <b>Dose ranges of servings of pasta consumed per week</b> | <b><math>\beta</math> (95% CIs) *</b> | <b>Residual <math>I^2</math> †</b> | <b><i>p</i>-value</b> |
|--------------------------------------------------------------|-----------------------------------------------------------|---------------------------------------|------------------------------------|-----------------------|
| 3.0                                                          | $\leq 3.0$                                                | -0.70 (-3.27, 1.86)                   | 0.00%                              | 0.890                 |
|                                                              | $> 3.0$                                                   | 0.91 (-0.89, 2.70)                    |                                    |                       |
| 3.33                                                         | $\leq 3.33$                                               | 0.05 (-1.80, 1.89)                    | 0.00%                              | 0.518                 |
|                                                              | $> 3.33$                                                  | 0.44 (-1.75, 2.63)                    |                                    |                       |
| 3.5                                                          | $\leq 3.5$                                                | 0.09 (-1.65, 1.82)                    | 0.00%                              | 0.888                 |
|                                                              | $> 3.5$                                                   | 0.46 (-1.89, 2.81)                    |                                    |                       |

\*  $\beta$  is the slope derived from the piecewise linear meta-regression analyses and represents the treatment effect on body weight for doses above and below each dose-threshold representing servings of pasta consumption per week; † The residual  $I^2$  value indicates heterogeneity unexplained by each dose-threshold.

Supplementary Table S12: GRADE assessment of study quality

| Quality assessment*                                     |                   |              |                      |                      |             |                  | № of patients  |                | Effect                                               | Quality Importance                                                                |
|---------------------------------------------------------|-------------------|--------------|----------------------|----------------------|-------------|------------------|----------------|----------------|------------------------------------------------------|-----------------------------------------------------------------------------------|
| № of studies                                            | Design            | Risk of bias | Inconsistency        | Indirectness         | Imprecision | Publication Bias | Pasta/LGI diet | Higher GI diet | Absolute (95% CI)                                    |                                                                                   |
| <b>Body Weight (follow up: median 12 weeks)</b>         |                   |              |                      |                      |             |                  |                |                |                                                      |                                                                                   |
| 32                                                      | randomised trials | not serious  | not serious          | serious <sup>a</sup> | not serious | none             | 1294           | 1228           | MD <b>-0.63 kg</b><br>(-0.84 to -0.42)               | ⊕⊕⊕○<br>MODERATE <sup>a</sup><br>Due to downgrade for indirectness                |
| <b>BMI (follow up: median 12 weeks)</b>                 |                   |              |                      |                      |             |                  |                |                |                                                      |                                                                                   |
| 18                                                      | randomised trials | not serious  | not serious          | serious <sup>a</sup> | not serious | none             | 551            | 538            | MD <b>-0.26 kg/m<sup>2</sup></b><br>(-0.36 to -0.16) | ⊕⊕⊕○<br>MODERATE <sup>a</sup><br>Due to downgrade for indirectness                |
| <b>Waist Circumference (follow up: median 12 weeks)</b> |                   |              |                      |                      |             |                  |                |                |                                                      |                                                                                   |
| 18                                                      | randomised trials | not serious  | serious <sup>b</sup> | serious <sup>a</sup> | not serious | none             | 717            | 624            | MD <b>-0.46 cm</b><br>(-1.05 to 0.14)                | ⊕⊕○○<br>LOW <sup>a,b</sup><br>Due to downgrade for inconsistency and indirectness |



| Quality assessment*                                             |                   |              |                      |                      |             |                   | № of patients  |                | Effect                                | Quality Importance                                                                |
|-----------------------------------------------------------------|-------------------|--------------|----------------------|----------------------|-------------|-------------------|----------------|----------------|---------------------------------------|-----------------------------------------------------------------------------------|
| № of studies                                                    | Design            | Risk of bias | Inconsistency        | Indirectness         | Imprecision | Publication Bias  | Pasta/LGI diet | Higher GI diet | Absolute (95% CI)                     |                                                                                   |
| <b>Body Fat (follow up: median 12 weeks)</b>                    |                   |              |                      |                      |             |                   |                |                |                                       |                                                                                   |
| 10                                                              | randomised trials | not serious  | serious <sup>c</sup> | serious <sup>a</sup> | not serious | none              | 176            | 165            | MD <b>-0.01 %</b><br>(-0.58 to 0.56)  | ⊕⊕○○<br>LOW <sup>a,c</sup><br>Due to downgrade for inconsistency and indirectness |
| <b>Waist-to-hip Ratio (follow up: median 12 weeks)</b>          |                   |              |                      |                      |             |                   |                |                |                                       |                                                                                   |
| 6                                                               | randomised trials | not serious  | not serious          | serious <sup>a</sup> | not serious | none <sup>d</sup> | 223            | 222            | MD <b>-0.00</b><br>(-0.01 to 0.00)    | ⊕⊕⊕○<br>MODERATE <sup>a</sup><br>Due to downgrade for indirectness                |
| <b>Sagittal Abdominal Diameter (follow up: median 26 weeks)</b> |                   |              |                      |                      |             |                   |                |                |                                       |                                                                                   |
| 3                                                               | randomised trials | not serious  | not serious          | serious <sup>a</sup> | not serious | none <sup>d</sup> | 237            | 214            | MD <b>-0.09 cm</b><br>(-0.34 to 0.16) | ⊕⊕⊕○<br>MODERATE <sup>a</sup><br>Due to downgrade for indirectness                |

1  
2  
3 CI, Confidence interval; GI, glycemic index; LGI, low glycemic index; MD, Mean difference  
4

5  
6 \*All outcomes started with high quality evidence since all studies were randomized controlled trials. Risk of Bias –We rated down for  
7 risk of bias if the majority of studies were considered to be at high risk of bias. Inconsistency – We assessed inconsistency using  $I^2$   
8 estimates where an  $I^2$  of 50% or higher indicates substantial heterogeneity.  $I^2$  is the percentage of variability in the treatment estimates  
9 that is attributable to heterogeneity between studies. We rated down for inconsistency if there was substantial heterogeneity that was  
10 unexplained by any a priori sensitivity or subgroup analyses. Indirectness – We rated down for indirectness if there were factors  
11 present relating to the population, interventions, and outcomes that limited the generalizability of the results. Imprecision – We rated  
12 down for imprecision if the 95% confidence interval (95% CI) crossed the minimally important difference (MID) for harm. MIDs used  
13 for each outcome are: 0.5kg for body weight (based on Johnston et al. JAMA 2014;312(9):923-33); 0.2kg/m<sup>2</sup> for BMI; 2.0cm for  
14 waist circumference; 2.0% for body fat; 0.02 for waist-to-hip ratio; 2.0cm for sagittal abdominal diameter.  
15

16  
17 a. Downgrade for serious indirectness, since most of the available trials did not quantify the amount of pasta consumed in the context  
18 of the low-GI dietary patterns  
19

20 b. Downgrade for serious inconsistency, as there was evidence of substantial inter-study ( $I^2=62%$ , P-heterogeneity<0.001), which  
21 could not be explained  
22

23 c. Downgrade for serious inconsistency, as there was evidence of substantial inter-study ( $I^2= 65%$ , P-heterogeneity=0.003), which  
24 could not be explained  
25

26 d. No downgrade for publication bias, as publication bias could not be assessed due to lack of power for assessing funnel plot  
27 asymmetry and small study effects (<10 trials included in the meta-analysis)  
28  
29  
30  
31  
32  
33  
34  
35  
36  
37  
38  
39  
40  
41  
42  
43  
44  
45  
46  
47

1  
2  
3  
4  
5  
6  
7  
8  
9  
10  
11  
12  
13  
14  
15  
16  
17  
18  
19  
20  
21  
22  
23  
24  
25  
26  
27  
28  
29  
30  
31  
32  
33  
34  
35  
36  
37  
38  
39  
40  
41  
42  
43  
44  
45  
46  
47

**Supplemental Figures**

|                             | Random Sequence Generation | Allocation Concealment | Blinding of Participants, Personnel and Outcome Assessment | Incomplete Outcome Data | Selective Reporting |                                     | Random Sequence Generation | Allocation Concealment | Blinding of Participants, Personnel and Outcome Assessment | Incomplete Outcome Data | Selective Reporting |
|-----------------------------|----------------------------|------------------------|------------------------------------------------------------|-------------------------|---------------------|-------------------------------------|----------------------------|------------------------|------------------------------------------------------------|-------------------------|---------------------|
| Abete et al. 2008           | ?                          | ?                      | ?                                                          | +                       | +                   | Jimenez-Cruz et al. 2003            | ?                          | ?                      | ?                                                          | ?                       | +                   |
| Aston et al. 2008           | +                          | ?                      | +                                                          | +                       | +                   | Karl et al. 2015                    | +                          | +                      | +                                                          | +                       | +                   |
| Bellisle et al. 2007        | ?                          | ?                      | ?                                                          | ?                       | +                   | Larsen et al. 2010 -LowPro          | +                          | +                      | +                                                          | +                       | +                   |
| Buscemi et al. 2012         | +                          | +                      | +                                                          | ?                       | +                   | Larsen et al. 2010 -HighPro         | +                          | +                      | +                                                          | +                       | +                   |
| Cost et al. 2012            | ?                          | ?                      | +                                                          | +                       | +                   | McMillan-Price et al. 2006- HighCHO | ?                          | ?                      | +                                                          | +                       | +                   |
| de Rougemont et al. 2007    | ?                          | +                      | +                                                          | +                       | +                   | McMillan-Price et al. 2006- HighPro | ?                          | ?                      | +                                                          | +                       | +                   |
| Fontvielle et al. 1992      | ?                          | ?                      | +                                                          | +                       | +                   | Pereira et al. 2015                 | ?                          | ?                      | +                                                          | ?                       | +                   |
| Fontvielle et al. 1988      | ?                          | ?                      | +                                                          | +                       | +                   | Philippou et al. 2008               | ?                          | ?                      | +                                                          | ?                       | +                   |
| Frost et al. 2004           | ?                          | ?                      | +                                                          | +                       | +                   | Philippou et al. 2009-4mo           | ?                          | ?                      | +                                                          | ?                       | +                   |
| Heilbronn et al. 2002       | ?                          | ?                      | +                                                          | ?                       | +                   | Philippou et al. 2009-6mo           | ?                          | ?                      | ?                                                          | ?                       | +                   |
| Jebb et al. 2010 - HighMUFA | +                          | ?                      | +                                                          | ?                       | +                   | Sicheri et al. 2007                 | +                          | ?                      | +                                                          | ?                       | +                   |
| Jebb et al. 2010 - LowFat   | +                          | ?                      | +                                                          | ?                       | +                   | Solomon et al. 2010                 | ?                          | ?                      | +                                                          | +                       | +                   |
| Jenkins et al. 2014         | +                          | +                      | +                                                          | +                       | +                   | Visek et al. 2014                   | ?                          | ?                      | +                                                          | +                       | +                   |
| Jenkins et al. 2012         | +                          | +                      | +                                                          | +                       | +                   | Wolever et al. 2008                 | +                          | +                      | ?                                                          | +                       | +                   |
| Jenkins et al. 2008         | +                          | +                      | +                                                          | +                       | +                   | Wolever et al. 2002                 | +                          | +                      | +                                                          | +                       | +                   |
| Jensen et al. 2008          | ?                          | ?                      | +                                                          | +                       | +                   | Yusof et al. 2009                   | +                          | ?                      | +                                                          | +                       | +                   |

**Supplemental Figure S1: Cochrane risk of bias summary for all included trials**

Summary of risk of bias ratings for each individual study included in the meta-analysis.

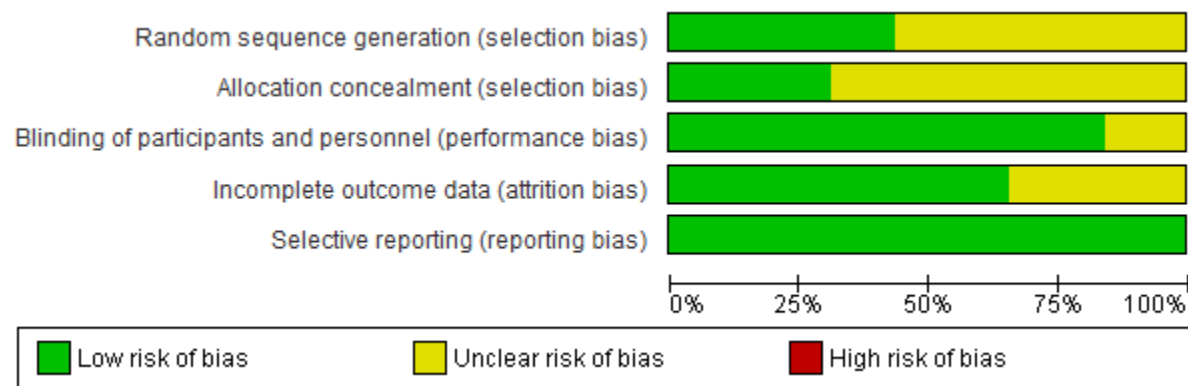

**Supplemental Figure S2: Risk of bias proportion graph for all included trials**

1  
2  
3  
4  
5  
6  
7  
8  
9  
10  
11  
12  
13  
14  
15  
16  
17  
18  
19  
20  
21  
22  
23  
24  
25  
26  
27  
28  
29  
30  
31  
32  
33  
34  
35  
36  
37  
38  
39  
40  
41  
42  
43  
44  
45  
46  
47

For peer review only

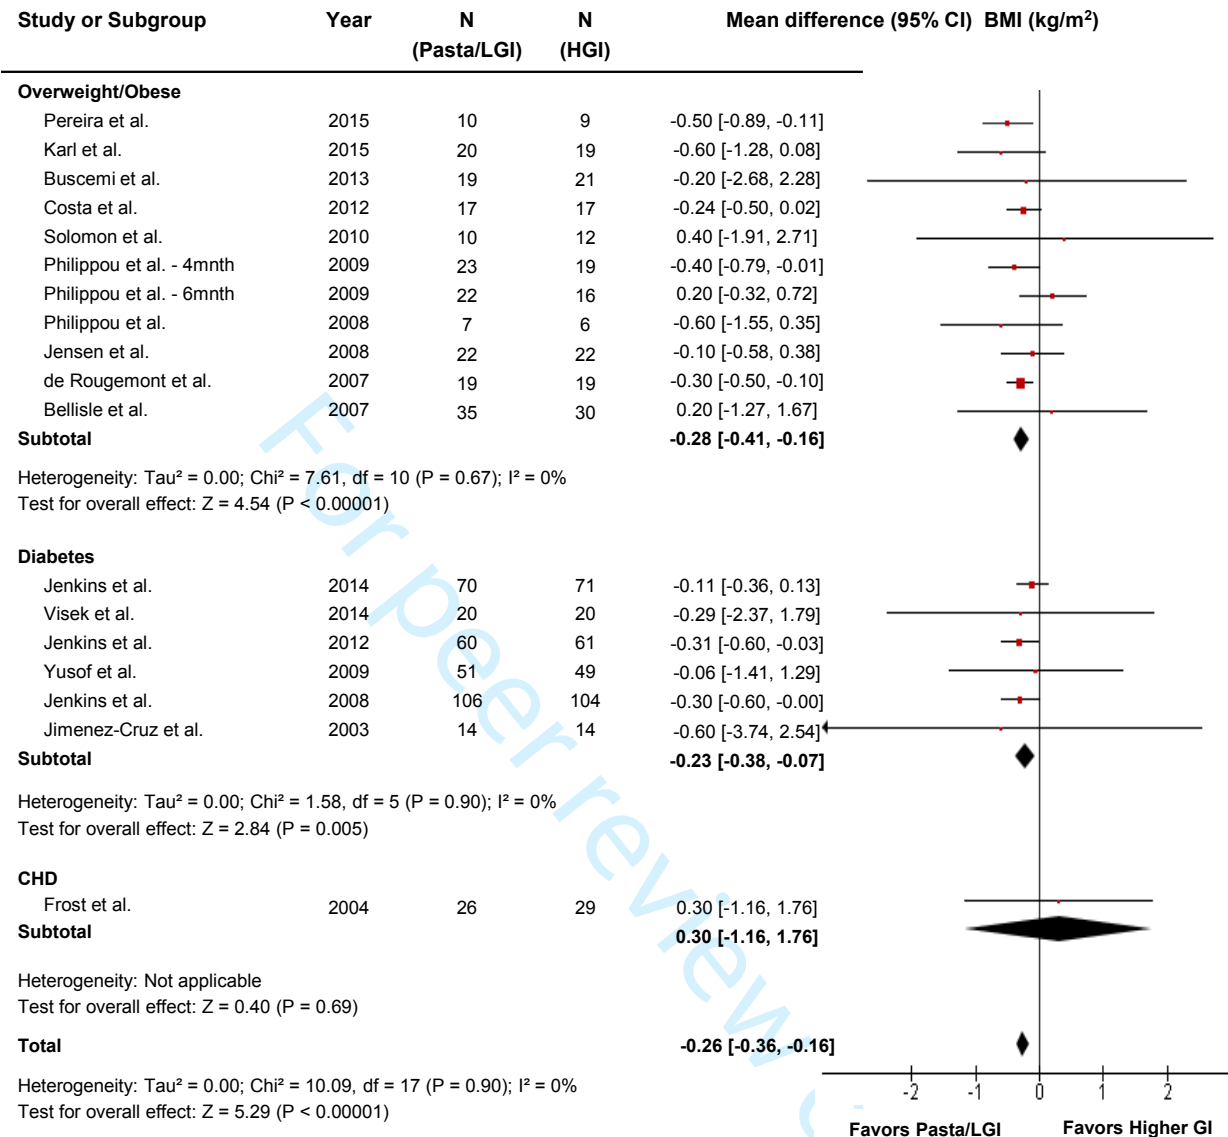

### Supplemental Figure S3: Forest plot of randomized controlled trials investigating the effects of pasta in the context of low-GI dietary patterns on BMI (kg/m<sup>2</sup>) (n= 1038)

Data are expressed as mean differences represented by a square and 95% CIs by the line through the square. 95% CIs exceeding the plot's bounds are represented by an arrowhead. Pooled effect estimates are represented by diamonds and were estimated with the use of generic inverse variance random effects models. Between-study heterogeneity was detected with the use of the Cochran's Q statistic at a significance level of  $P < 0.10$  and quantified with the use of the  $I^2$  statistic where  $I^2 \geq 50\%$  is considered to be evidence of substantial heterogeneity and  $\geq 75\%$  considerable heterogeneity.

BMI, body mass index; CHD, coronary heart disease; CI, confidence interval; HGI, higher glycemic index diet; GI, glycemic index; LGI, low glycemic index diet

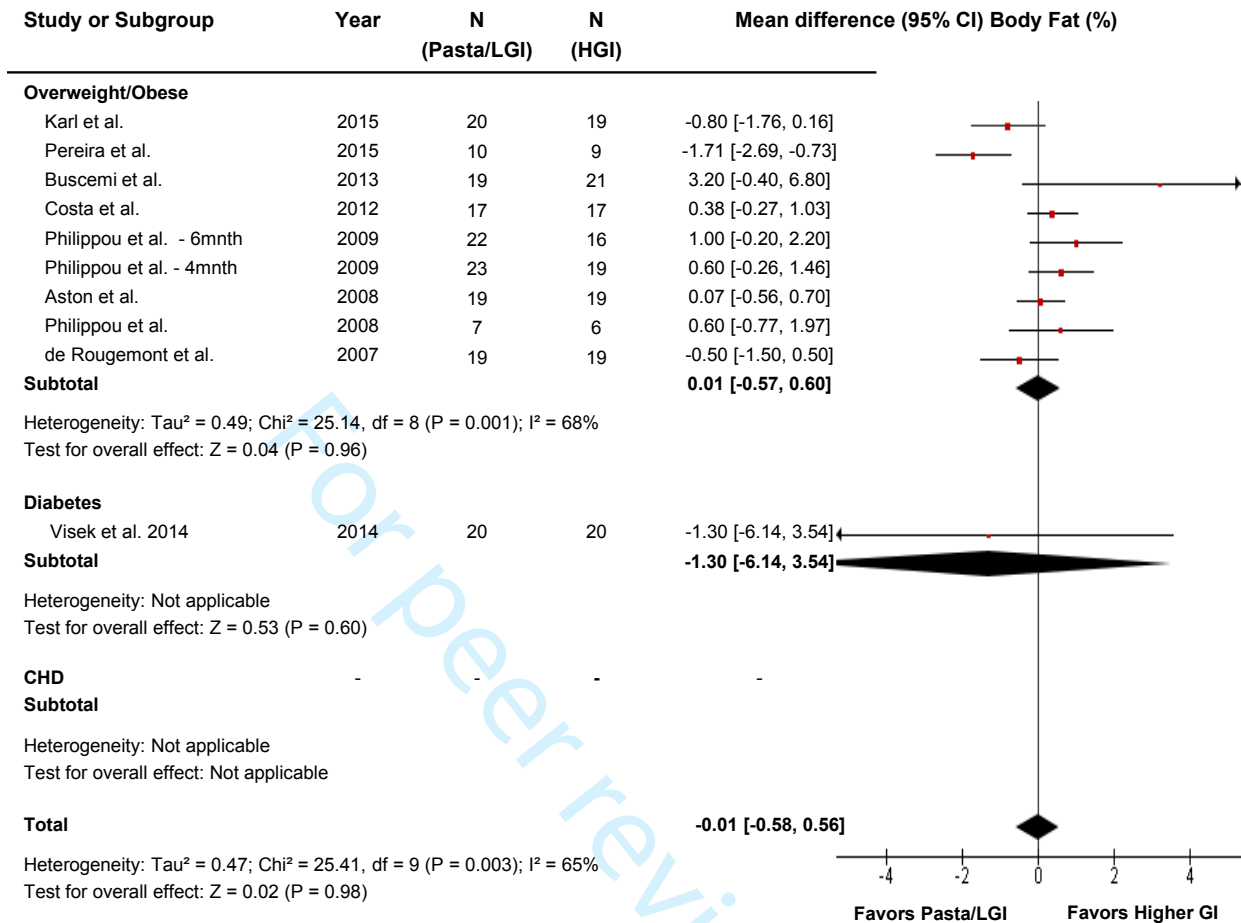

### Supplemental Figure S4: Forest plot of randomized controlled trials investigating the effects of pasta in the context of low-GI dietary patterns on body fat (%) (n= 285)

Data are expressed as mean differences represented by a square and 95% CIs by the line through the square. 95% CIs exceeding the plot's bounds are represented by an arrowhead. Pooled effect estimates are represented by diamonds and were estimated with the use of generic inverse variance random effects models. Between-study heterogeneity was detected with the use of the Cochran's Q statistic at a significance level of  $P < 0.10$  and quantified with the use of the  $I^2$  statistic where  $I^2 \geq 50\%$  is considered to be evidence of substantial heterogeneity and  $\geq 75\%$  considerable heterogeneity.

CHD, coronary heart disease; CI, confidence interval; HGI, higher glycemic index diet; GI, glycemic index; LGI, low glycemic index diet

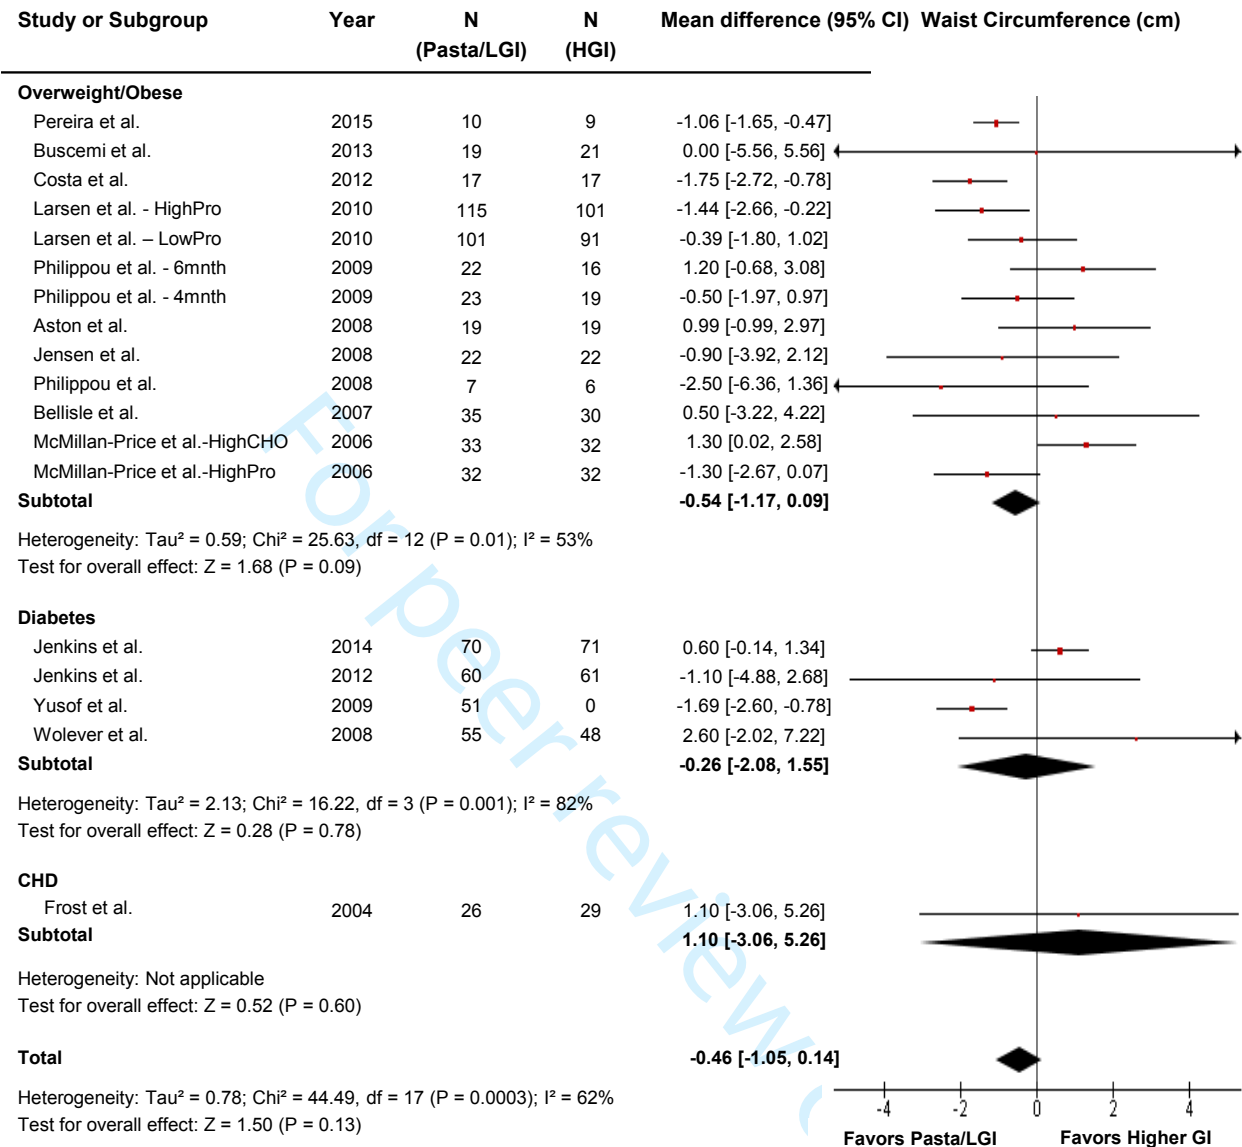

### Supplemental Figure S5: Forest plot of randomized controlled trials investigating the effects of pasta in the context of low-GI dietary patterns on waist circumference (cm) (n = 1380)

Data are expressed as mean differences represented by a square and 95% CIs by the line through the square. 95% CIs exceeding the plot's bounds are represented by an arrowhead. Pooled effect estimates are represented by diamonds and were estimated with the use of generic inverse variance random effects models. Between-study heterogeneity was detected with the use of the Cochran's Q statistic at a significance level of  $P < 0.10$  and quantified with the use of the  $I^2$  statistic where  $I^2 \geq 50\%$  is considered to be evidence of substantial heterogeneity and  $\geq 75\%$  considerable heterogeneity.

CHD, coronary heart disease; CHO, carbohydrate; CI, confidence interval; HGI, higher glycemic index diet; GI, glycemic index; LGI, low glycemic index diet; Pro, protein



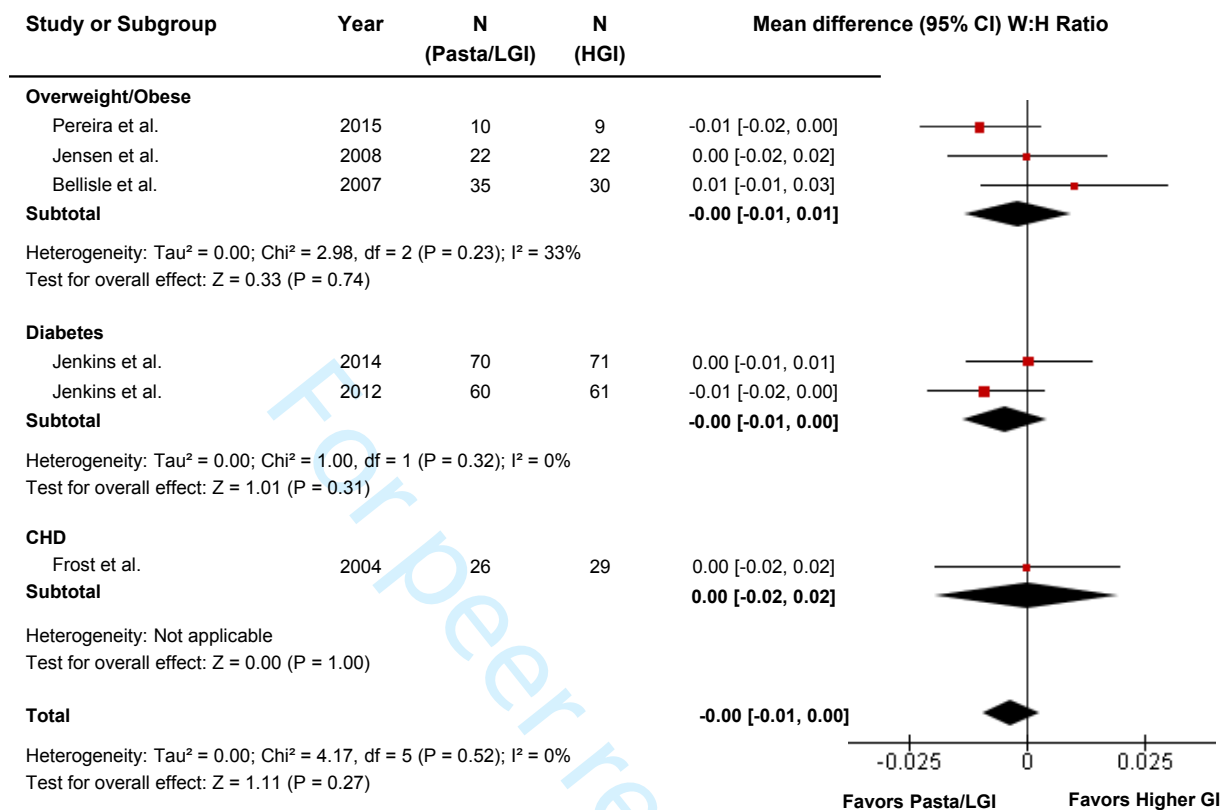

### Supplemental Figure S6: Forest plot of randomized controlled trials investigating the effects of pasta in the context of low-GI dietary patterns on waist-to-hip ratio (n = 445)

Data are expressed as mean differences represented by a square and 95% CIs by the line through the square. 95% CIs exceeding the plot's bounds are represented by an arrowhead. Pooled effect estimates are represented by diamonds and were estimated with the use of generic inverse variance random effects models. Between-study heterogeneity was detected with the use of the Cochran's Q statistic at a significance level of  $P < 0.10$  and quantified with the use of the  $I^2$  statistic where  $I^2 \geq 50\%$  is considered to be evidence of substantial heterogeneity and  $\geq 75\%$  considerable heterogeneity.

CHD, coronary heart disease; CI, confidence interval; HGI, higher glycemic index diet; GI, glycemic index; LGI, low glycemic index diet

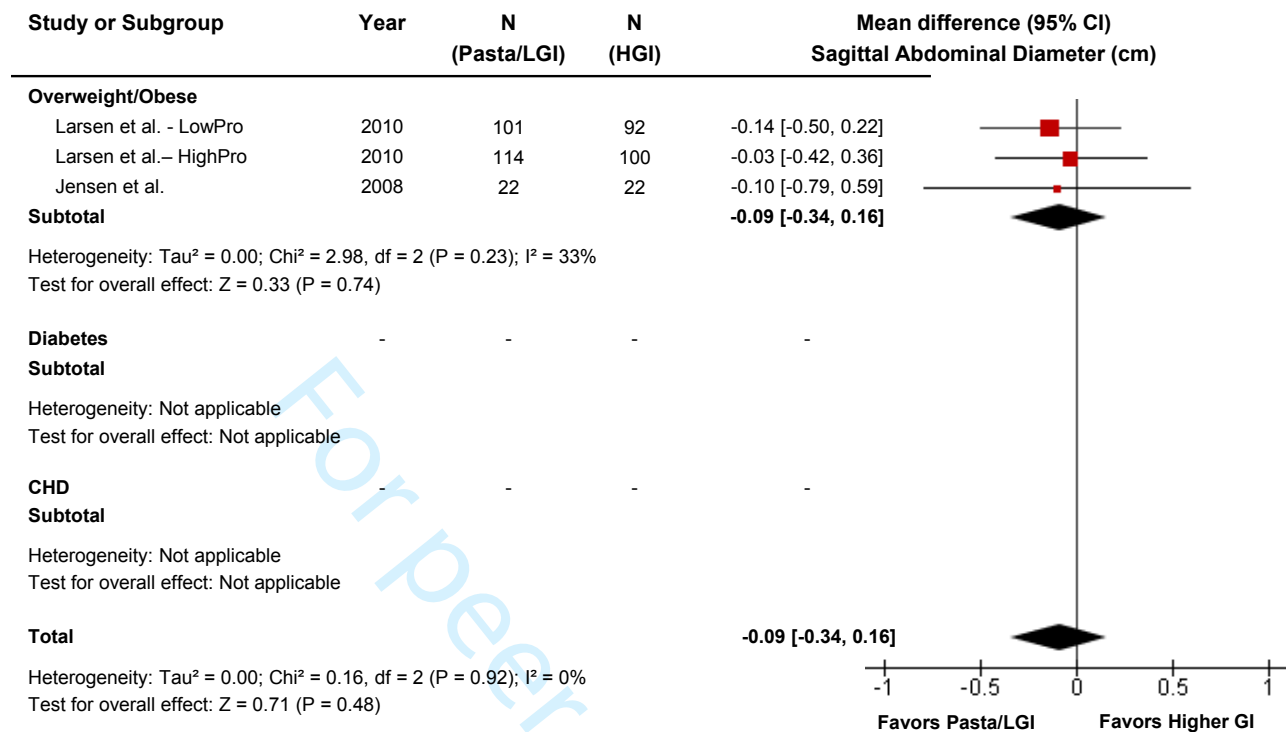

**Supplemental Figure S7: Forest plot of randomized controlled trials investigating the effects of pasta in the context of low-GI dietary patterns on sagittal abdominal diameter (cm) (n = 478)**

Data are expressed as mean differences represented by a square and 95% CIs by the line through the square. 95% CIs exceeding the plot's bounds are represented by an arrowhead. Pooled effect estimates are represented by diamonds and were estimated with the use of generic inverse variance random effects models. Between-study heterogeneity was detected with the use of the Cochran's Q statistic at a significance level of P<0.10 and quantified with the use of the I<sup>2</sup> statistic where I<sup>2</sup>≥50% is considered to be evidence of substantial heterogeneity and ≥75% considerable heterogeneity.

CHD, coronary heart disease; CI, confidence interval; HGI, higher glycemic index diet; GI, glycemic index; LGI, low glycemic index diet; Pro, protein

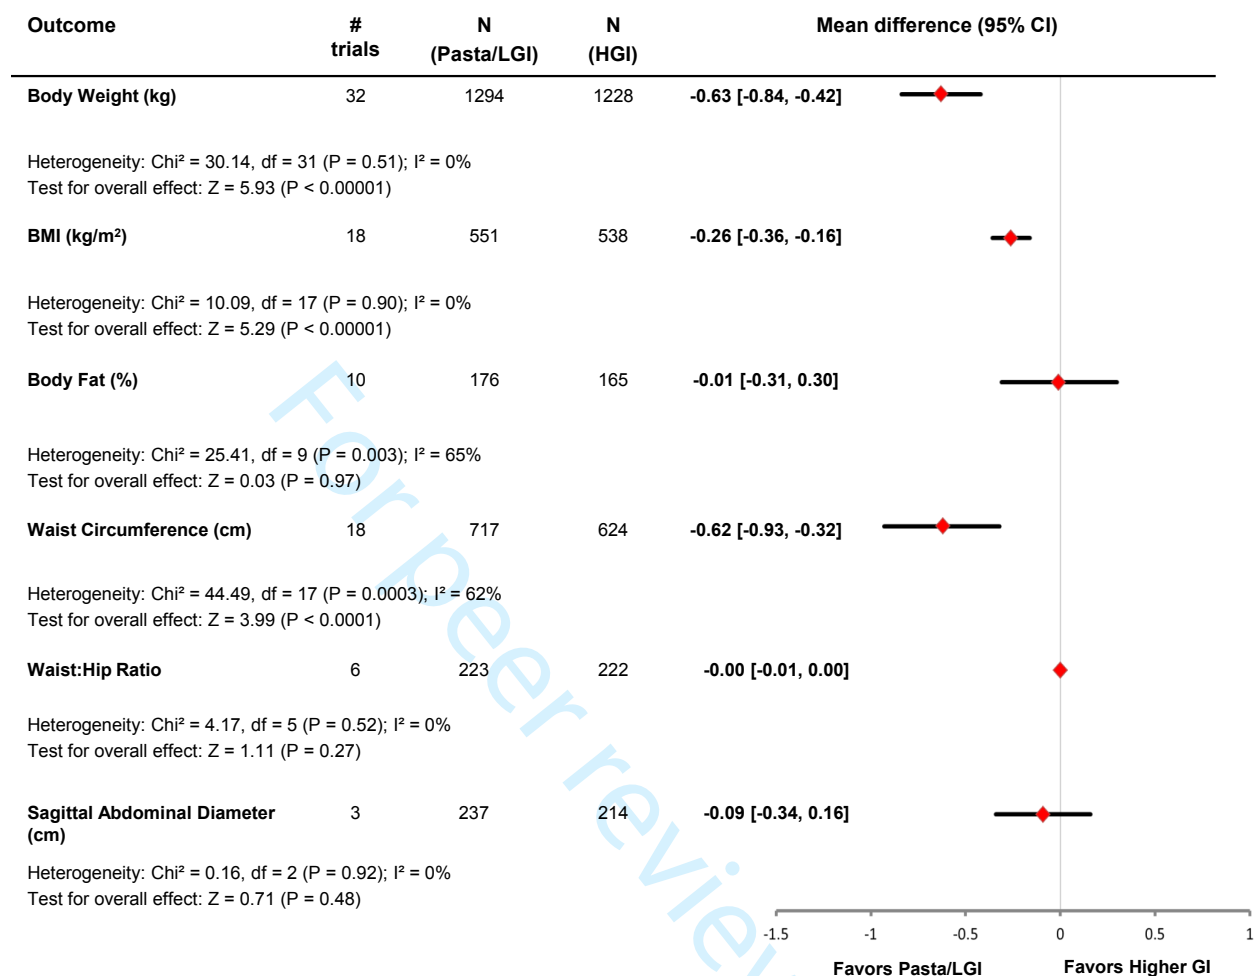

### Supplemental Figure S8: Forest plot of randomized controlled trials investigating the effects of pasta in the context of low-GI dietary patterns on body weight (kg) using fixed effects models (n = 2448)

Data are expressed as mean differences represented by a square and 95% CIs by the line through the square. 95% CIs exceeding the plot's bounds are represented by an arrowhead. Pooled effect estimates are represented by diamonds and were estimated with the use of generic inverse variance fixed effects models. Between-study heterogeneity was detected with the use of the Cochran's Q statistic at a significance level of  $P < 0.10$  and quantified with the use of the  $I^2$  statistic where  $I^2 \geq 50\%$  is considered to be evidence of substantial heterogeneity and  $\geq 75\%$  considerable heterogeneity.

CHD, coronary heart disease; CHO, carbohydrate; CI, confidence interval; HGI, higher glycemic index diet; GI, glycemic index; LGI, low glycemic index diet; MUFA, monounsaturated fatty acids; Pro, protein.

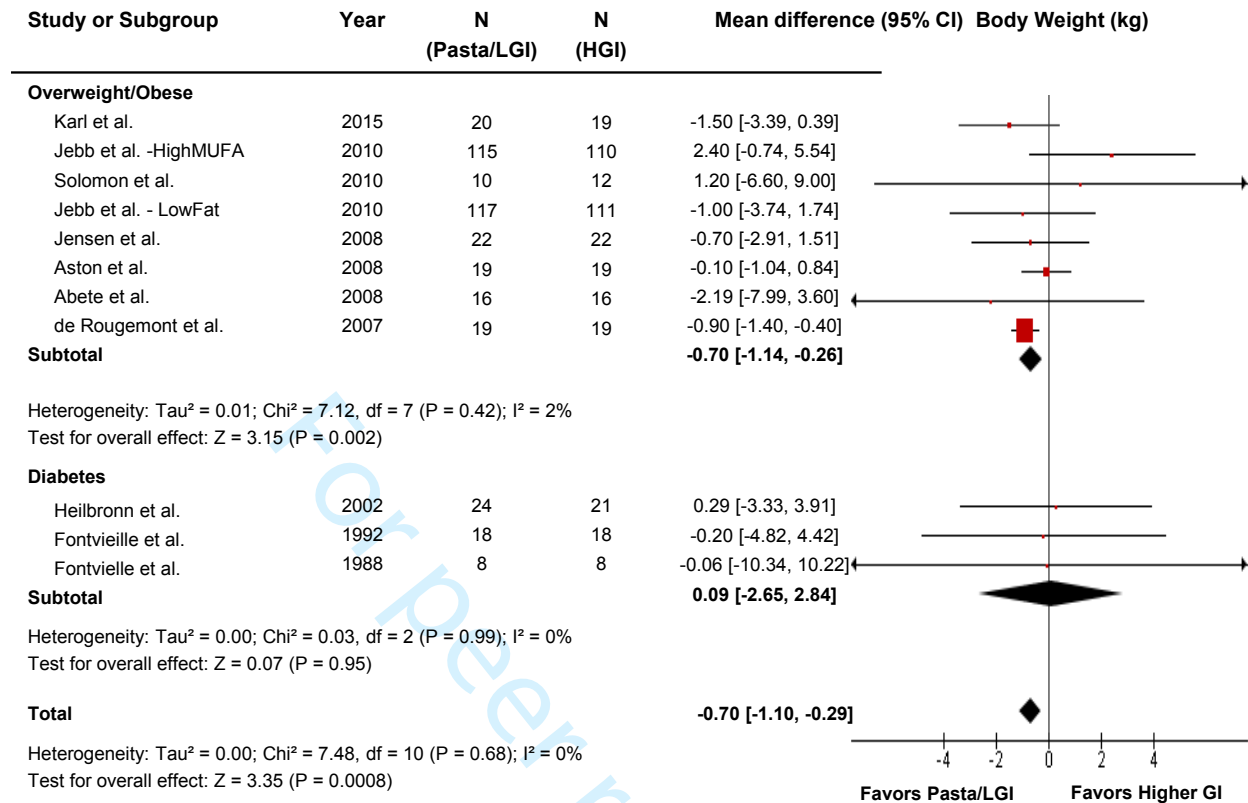

**Supplemental Figure S9: Forest plot of randomized controlled trials which contain data for approximating pasta intake which are investigating the effects of pasta in the context of low-GI dietary patterns on body weight (kg) (n = 740)**

Data are expressed as mean differences represented by a square and 95% CIs by the line through the square. 95% CIs exceeding the plot’s bounds are represented by an arrowhead. Pooled effect estimates are represented by diamonds and were estimated with the use of generic inverse variance random effects models. Between-study heterogeneity was detected with the use of the Cochran’s Q statistic at a significance level of P<0.10 and quantified with the use of the I<sup>2</sup> statistic where I<sup>2</sup>≥50% is considered to be evidence of substantial heterogeneity and ≥75% considerable heterogeneity.

CI, confidence interval; HGI, higher glycemic index diet; GI, glycemic index; LGI, low glycemic index diet; MUFA, monounsaturated fatty acids

1  
2  
3  
4  
5  
6  
7  
8  
9  
10  
11  
12  
13  
14  
15  
16  
17  
18  
19  
20  
21  
22  
23  
24  
25  
26  
27  
28  
29  
30  
31  
32  
33  
34  
35  
36  
37  
38  
39  
40  
41  
42  
43  
44  
45  
46  
47

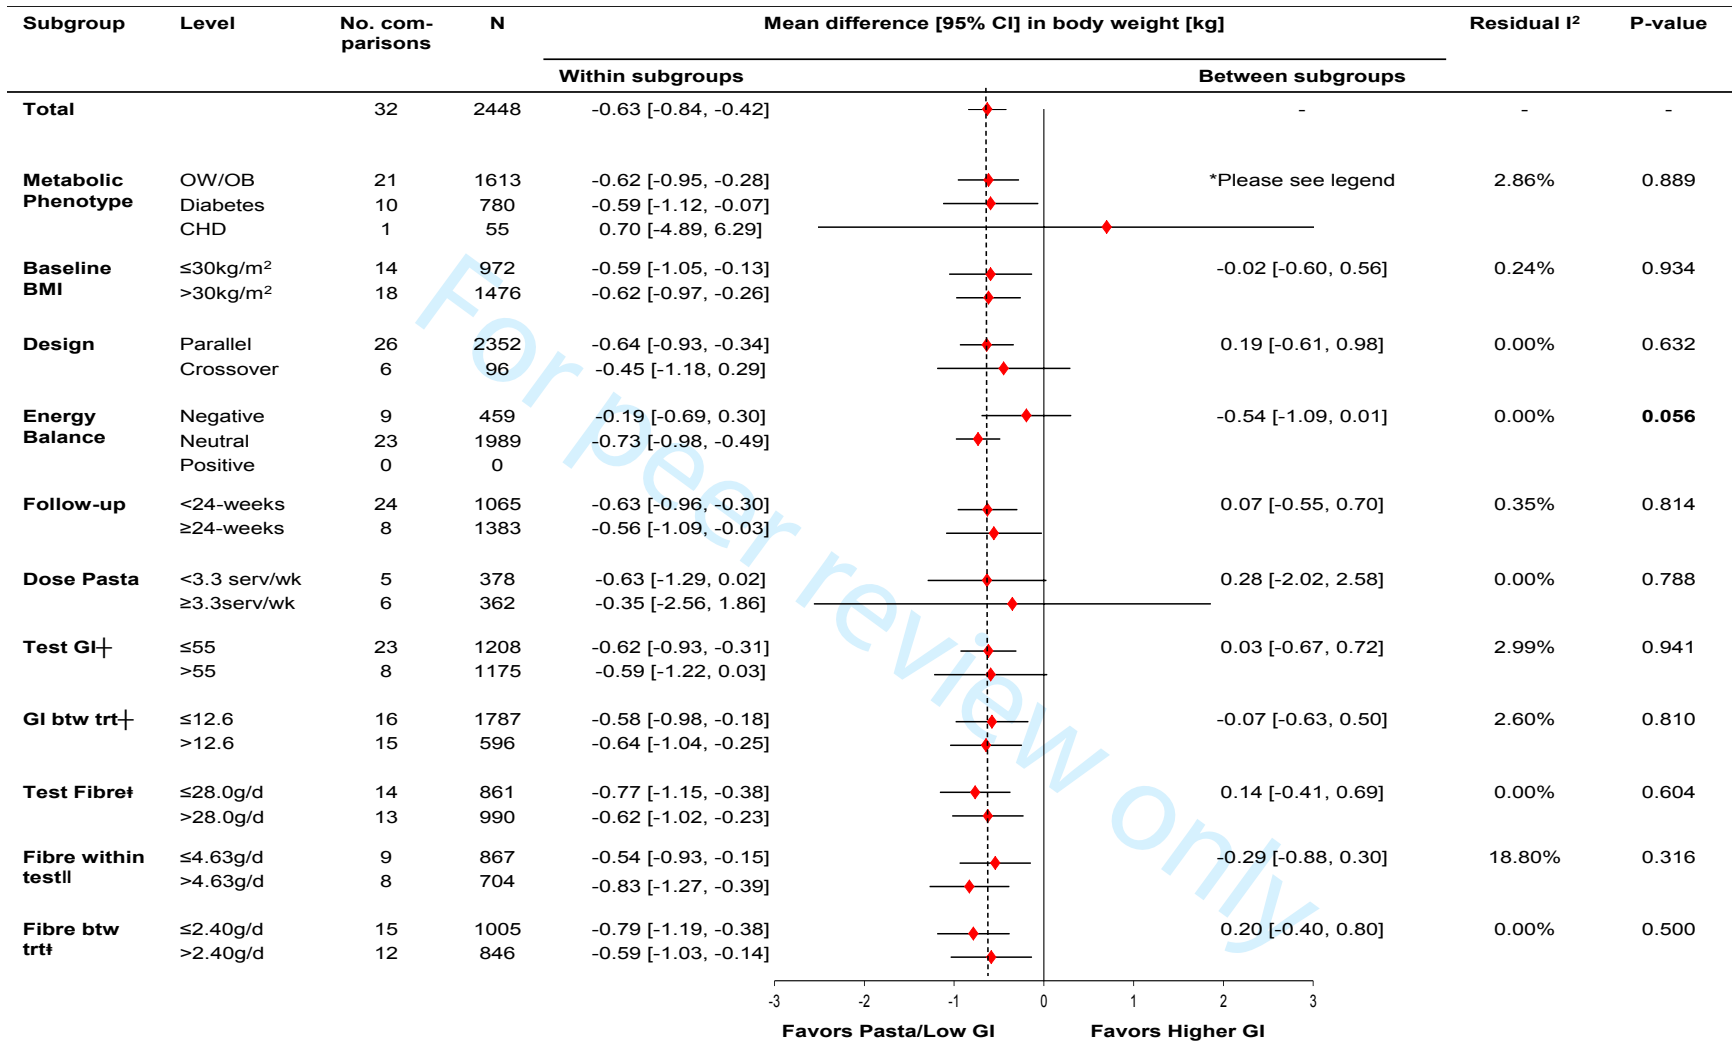

Supplemental Figure S10: Subgroup analysis for mean differences (95% CIs) of the effects of pasta in the context of low-GI dietary patterns on body weight (kg) (n = 2448)

1  
2  
3 The dashed line represents the pooled estimate for the overall primary analysis of pasta in the context of low-GI dietary patterns on  
4 body weight. Within subgroup mean differences are the pooled effect estimates represented by a diamond. 95% CIs are represented by  
5 the line through the square. The residual  $I^2$  was estimated with the use of the Cochran's Q statistic and indicates the between study  
6 heterogeneity unexplained by the variability in response because of the specific between studies factor.  $P < 0.05$  indicated that the  
7 effect size differed between levels of the subgroup. Within and between-treatment changes were categorically assessed based on the  
8 median intakes.  
9

10  
11 BMI, body mass index; btw, between; CHD, coronary heart disease; CI, confidence interval; GI, glycemic index (glucose scale); OB,  
12 obese; OW, overweight; serv, serving; trt, treatment; wk, week.  
13

14  
15 \*Pairwise between-subgroup mean differences (95% CIs) for Metabolic Phenotype were as follows: 0.02kg (-0.08, 0.65) (1 vs. 2) to  
16 1.32kg (-4.28, 6.91) (1 vs. 3) to -1.29kg (-6.91, 4.32) (2 vs. 3).

17 † data available on 31 studies

18 ‡ data available on 17 studies

19 † data available on 27 studies  
20  
21  
22  
23  
24  
25  
26  
27  
28  
29  
30  
31  
32  
33  
34  
35  
36  
37  
38  
39  
40  
41  
42  
43  
44  
45  
46  
47

1  
2  
3  
4  
5  
6  
7  
8  
9  
10  
11  
12  
13  
14  
15  
16  
17  
18  
19  
20  
21  
22  
23  
24  
25  
26  
27  
28  
29  
30  
31  
32  
33  
34  
35  
36  
37  
38  
39  
40  
41  
42  
43  
44  
45  
46  
47

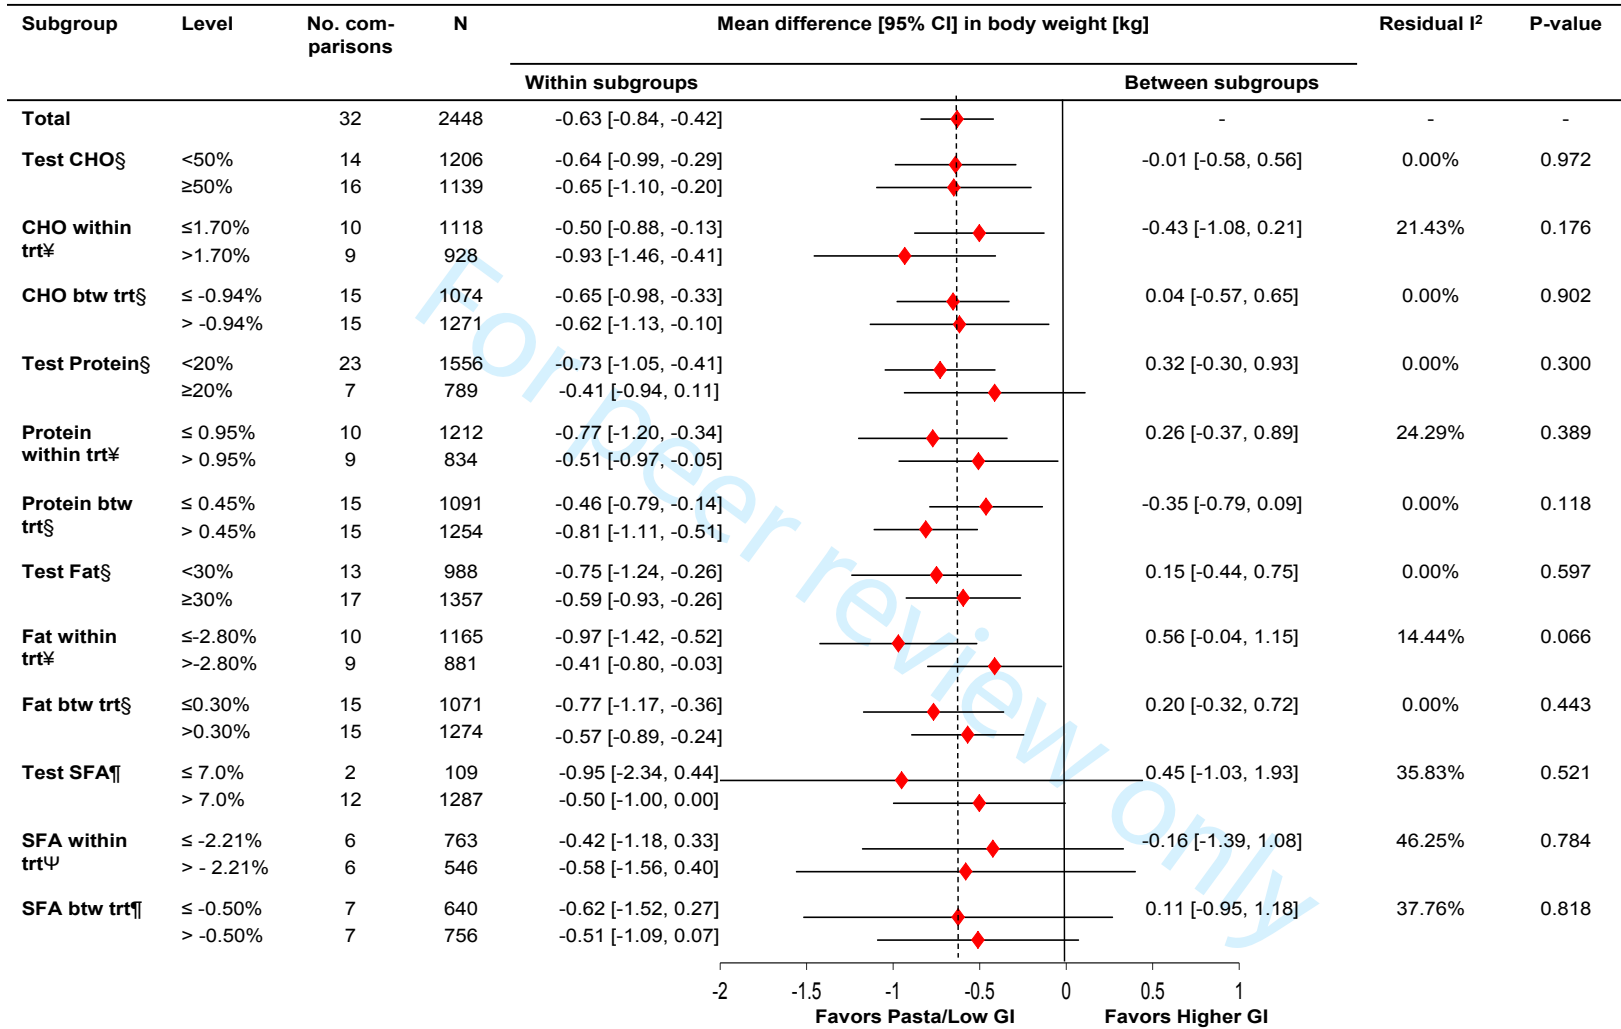

**Supplemental Figure S11: Subgroup analysis for mean differences (95% CIs) of the effects of pasta in the context of low-GI dietary patterns on body weight (kg) continued (n = 2448)**

1  
2  
3 The dashed line represents the pooled estimate for the overall primary analysis of pasta in the context of low-GI dietary patterns on  
4 body weight. Within subgroup mean differences are the pooled effect estimates represented by a diamond. 95% CIs are represented by  
5 the line through the square. The residual  $I^2$  was estimated with the use of the Cochran's Q statistic and indicates the between study  
6 heterogeneity unexplained by the variability in response because of the specific between studies factor.  $P < 0.05$  indicated that the  
7 effect size differed between levels of the subgroup. Within and between-treatment changes were categorically assessed based on the  
8 median intakes.  
9

10  
11 BMI, body mass index; btw, between; CI, confidence interval; GI, glycemic index (glucose scale); trt, treatment.

12 § data available on 30 studies

13 ¥ data available on 19 studies

14 ¶ data available on 14 studies

15 Ψ data available on 12 studies  
16  
17  
18  
19  
20  
21  
22  
23  
24  
25  
26  
27  
28  
29  
30  
31  
32  
33  
34  
35  
36  
37  
38  
39  
40  
41  
42  
43  
44  
45  
46  
47



1  
2  
3  
4  
5  
6  
7  
8  
9  
10  
11  
12  
13  
14  
15  
16  
17  
18  
19  
20  
21  
22  
23  
24  
25  
26  
27  
28  
29  
30  
31  
32  
33  
34  
35  
36  
37  
38  
39  
40  
41  
42  
43  
44  
45  
46  
47

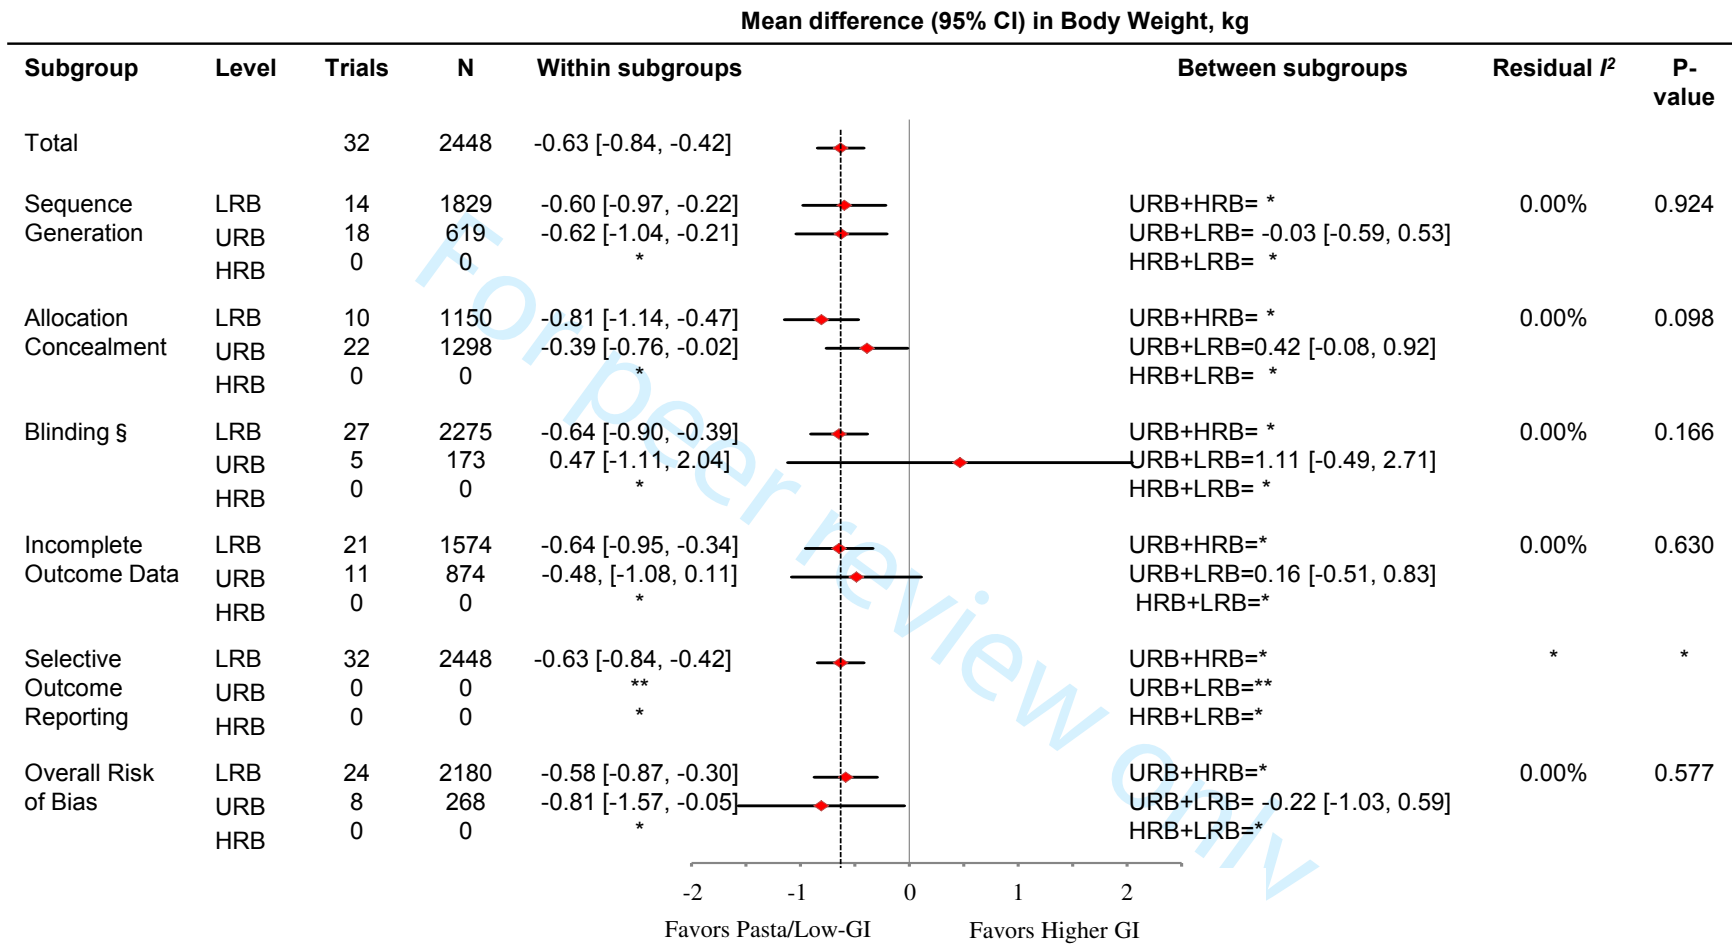

**Supplemental Figure S12: A priori subgroup analyses on risk of bias for mean differences (95% CIs) of the effect of pasta in the context of low-GI dietary patterns on body weight (kg) (n = 2448)**

1  
2  
3 The dashed line represents the pooled estimate for the overall primary analysis of pasta in the context of low-GI dietary patterns on  
4 body weight. Within subgroup mean differences are the pooled effect estimates represented by a diamond. 95% CIs are represented by  
5 the line through the square. The residual  $I^2$  was estimated with the use of the Cochran's Q statistic and indicates the between study  
6 heterogeneity unexplained by the variability in response because of the specific between studies factor.  $P < 0.05$  indicated that the  
7 effect size differed between levels of the subgroup.  
8  
9

10 LRB=Low Risk of Bias, URB= Unclear Risk of Bias, HRB=High Risk of Bias. \*Within and between subgroup analysis could not be  
11 performed against HRB since no values for HRB subgroup. \*\* no values for URB subgroup. § Blinding of Participants, Personnel,  
12 and Outcome Assessors.  
13  
14  
15  
16  
17  
18  
19  
20  
21  
22  
23  
24  
25  
26  
27  
28  
29  
30  
31  
32  
33  
34  
35  
36  
37  
38  
39  
40  
41  
42  
43  
44  
45  
46  
47

1  
2  
3  
4  
5  
6  
7  
8  
9  
10  
11  
12  
13  
14  
15  
16  
17  
18  
19  
20  
21  
22  
23  
24  
25  
26  
27  
28  
29  
30  
31  
32  
33  
34  
35  
36  
37  
38  
39  
40  
41  
42  
43  
44  
45  
46  
47

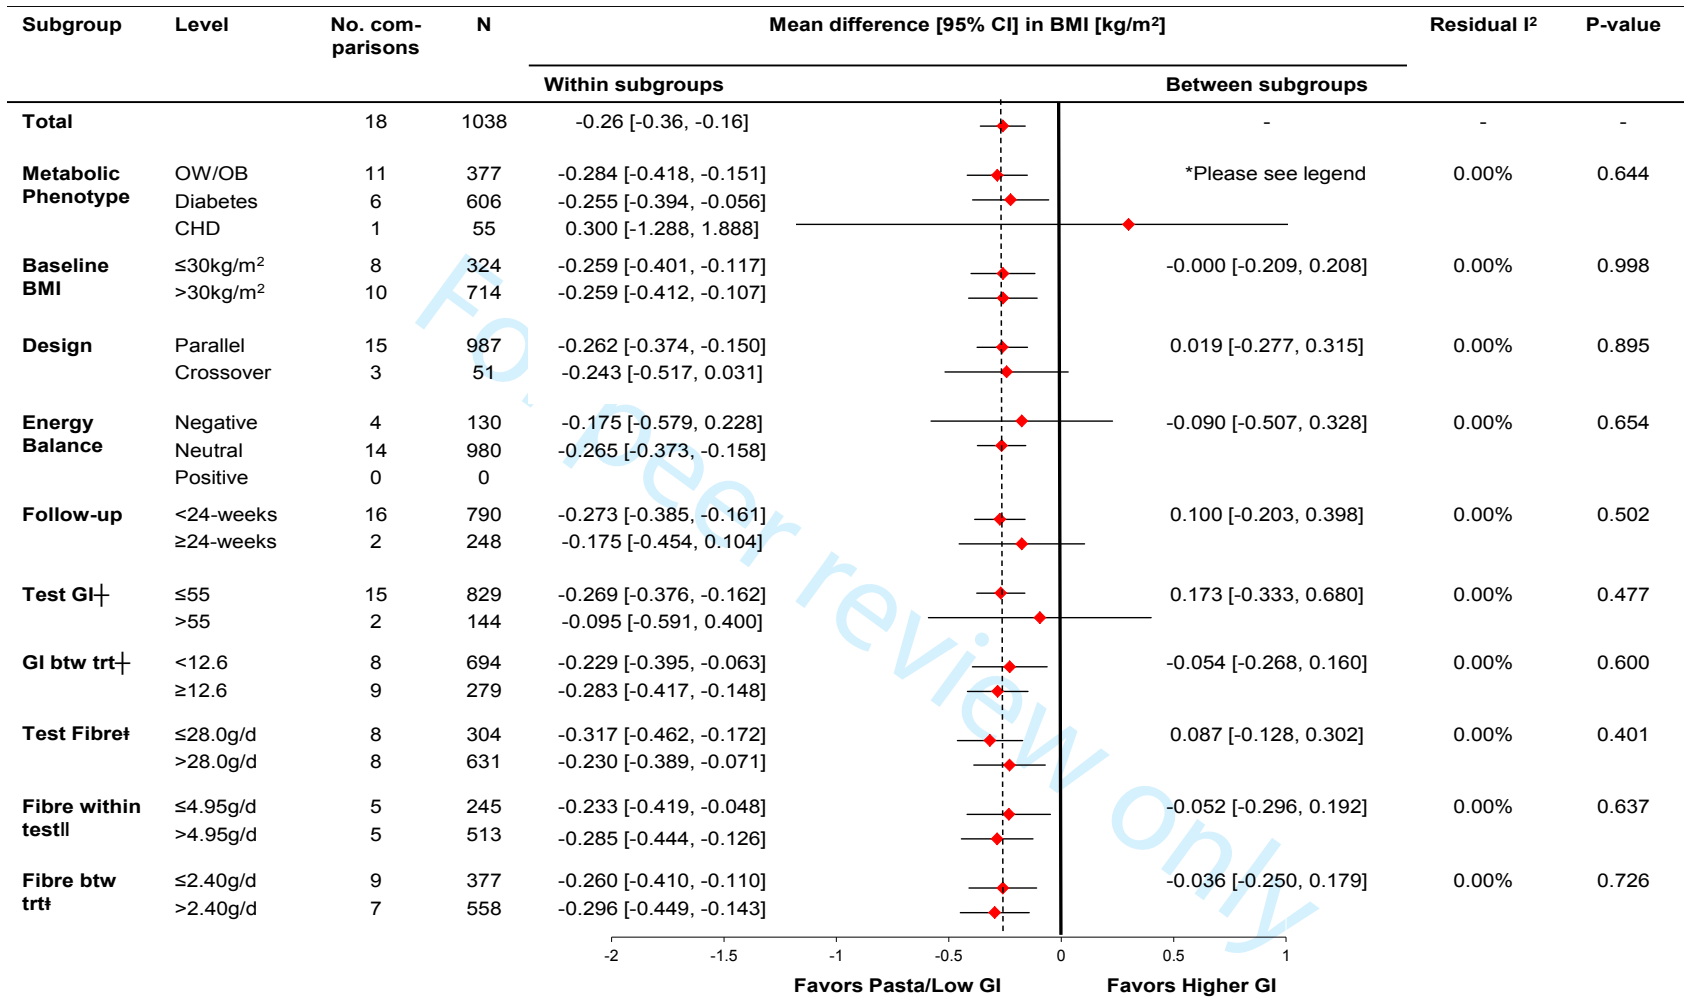

**Supplemental Figure S13: Subgroup analysis for mean differences (95% CIs) of the effects of pasta in the context of low-GI dietary patterns on body mass index, BMI (kg/m<sup>2</sup>) (n = 1038)**

The dashed line represents the pooled estimate for the overall primary analysis of pasta in the context of low-GI dietary patterns on BMI. Within subgroup mean differences are the pooled effect estimates represented by a diamond. 95% CIs are represented by the line through the square. The residual I<sup>2</sup> was estimated with the use of the Cochran’s Q statistic and indicates the between study

1  
2  
3 heterogeneity unexplained by the variability in response because of the specific between studies factor.  $P < 0.05$  indicated that the  
4 effect size differed between levels of the subgroup. Within and between-treatment changes were categorically assessed based on the  
5 median intakes. There were less than 10 trials available for categorical subgroup assessment for dose (n=3 trials), therefore analyses  
6 were not performed.  
7  
8

9 \*Pairwise between-subgroup mean differences (95% CIs) for Metabolic Phenotype were as follows:  $0.059\text{kg/m}^2$  (-0.156, 0.274) (1 vs.  
10 2) to  $0.584\text{kg/m}^2$  (-1.009, 2.178) (1 vs. 3) to  $-0.525\text{kg/m}^2$  (-2.122, 1.072) (2 vs. 3).  
11

12 † data available on 17 studies

13 ‡ data available on 16 studies

14 ‖ data available on 10 studies  
15

16 BMI, body mass index; btw, between; CI, confidence interval; GI, glycemic index (glucose scale); OB, obese; OW, overweight; trt,  
17 treatment.  
18  
19  
20  
21  
22  
23  
24  
25  
26  
27  
28  
29  
30  
31  
32  
33  
34  
35  
36  
37  
38  
39  
40  
41  
42  
43  
44  
45  
46  
47

1  
2  
3  
4  
5  
6  
7  
8  
9  
10  
11  
12  
13  
14  
15  
16  
17  
18  
19  
20  
21  
22  
23  
24  
25  
26  
27  
28  
29  
30  
31  
32  
33  
34  
35  
36  
37  
38  
39  
40  
41  
42  
43  
44  
45  
46  
47

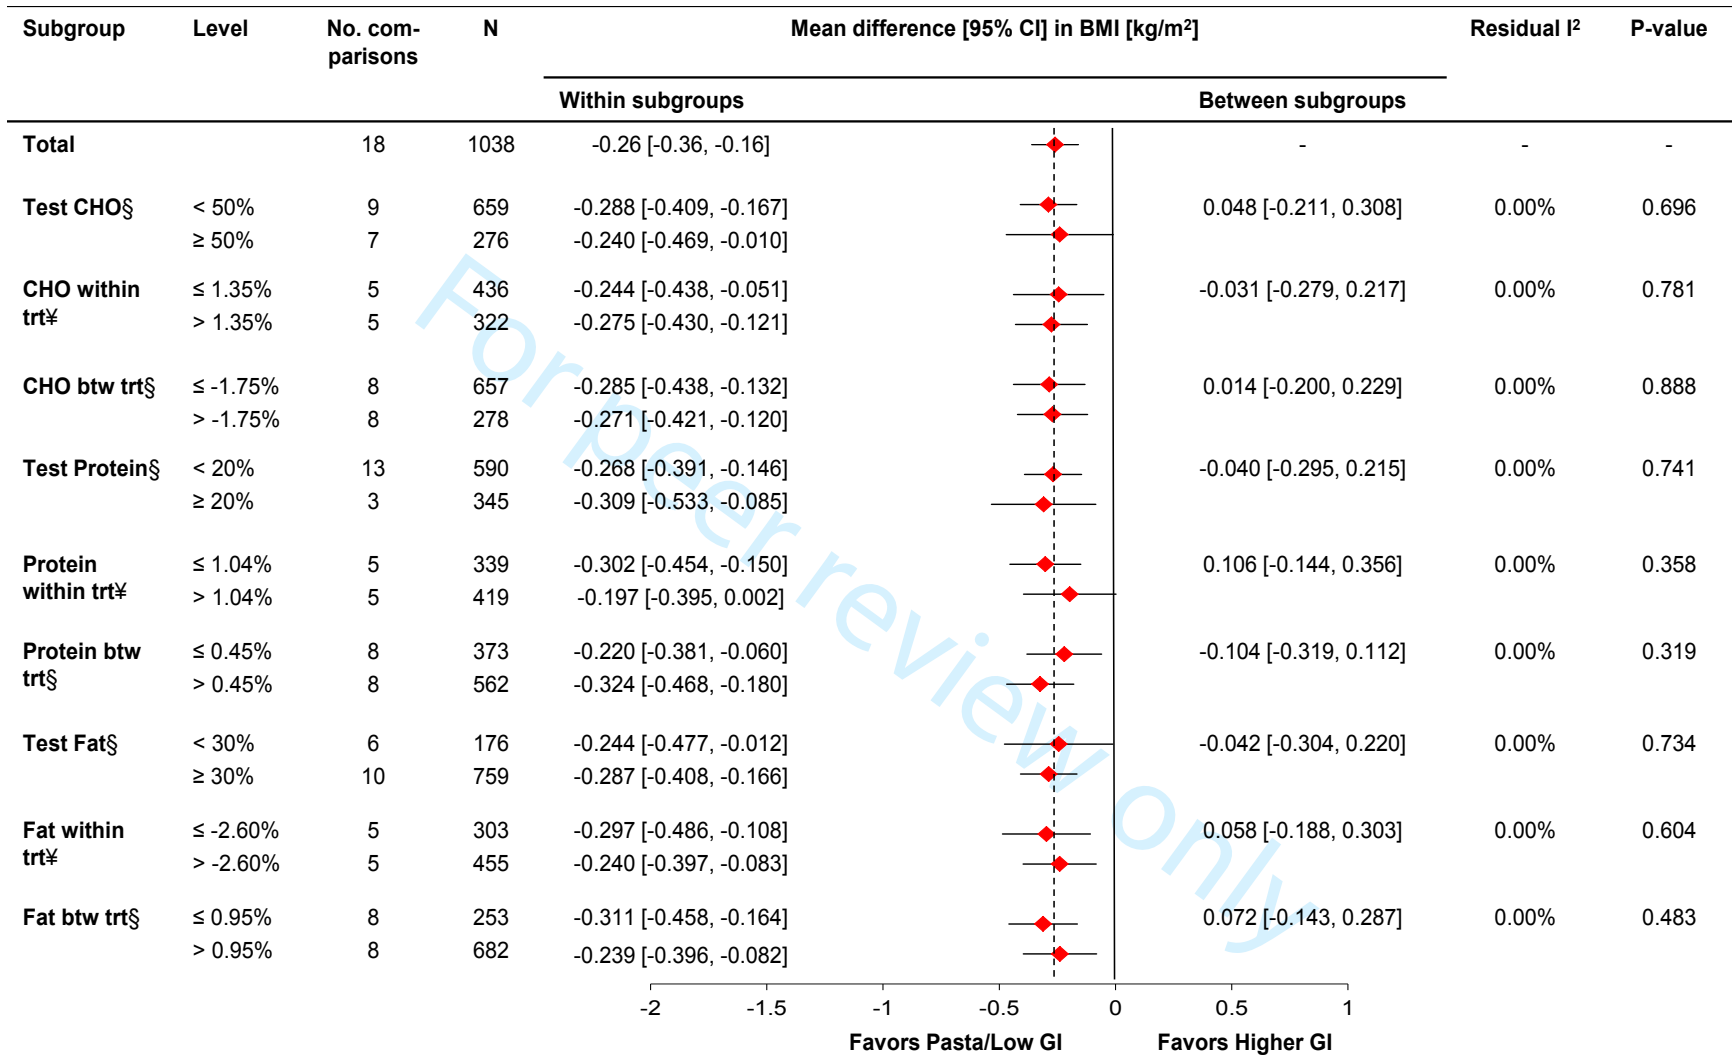

**Supplemental Figure S14: Subgroup analysis for mean differences (95% CIs) of the effects of pasta in the context of low-GI dietary patterns on body mass index, BMI (kg/m<sup>2</sup>) continued (n = 1038)**

1  
2  
3 The dashed line represents the pooled estimate for the overall primary analysis of pasta in the context of low-GI dietary patterns on  
4 BMI. Within subgroup mean differences are the pooled effect estimates represented by a diamond. 95% CIs are represented by the line  
5 through the square. The residual  $I^2$  was estimated with the use of the Cochran's Q statistic and indicates the between study  
6 heterogeneity unexplained by the variability in response because of the specific between studies factor.  $P < 0.05$  indicated that the  
7 effect size differed between levels of the subgroup. Within and between-treatment changes were categorically assessed based on the  
8 median intakes. There were less than 10 trials available for categorical subgroup assessment for test saturated fat (n=7 trials), saturated  
9 fat within treatment (n=6 trials) and saturated fat between treatments (n=7 trials), therefore analyses were not performed.

10  
11 § data available on 16 studies

12 ¥ data available on 10 studies  
13

14  
15 BMI, body mass index; btw, between; CHO, carbohydrate; CI = confidence interval; GI, glycemic index (glucose scale); trt, treatment.  
16  
17  
18  
19  
20  
21  
22  
23  
24  
25  
26  
27  
28  
29  
30  
31  
32  
33  
34  
35  
36  
37  
38  
39  
40  
41  
42  
43  
44  
45  
46  
47

1  
2  
3  
4  
5  
6  
7  
8  
9  
10  
11  
12  
13  
14  
15  
16  
17  
18  
19  
20  
21  
22  
23  
24  
25  
26  
27  
28  
29  
30  
31  
32  
33  
34  
35  
36  
37  
38  
39  
40  
41  
42  
43  
44  
45  
46  
47

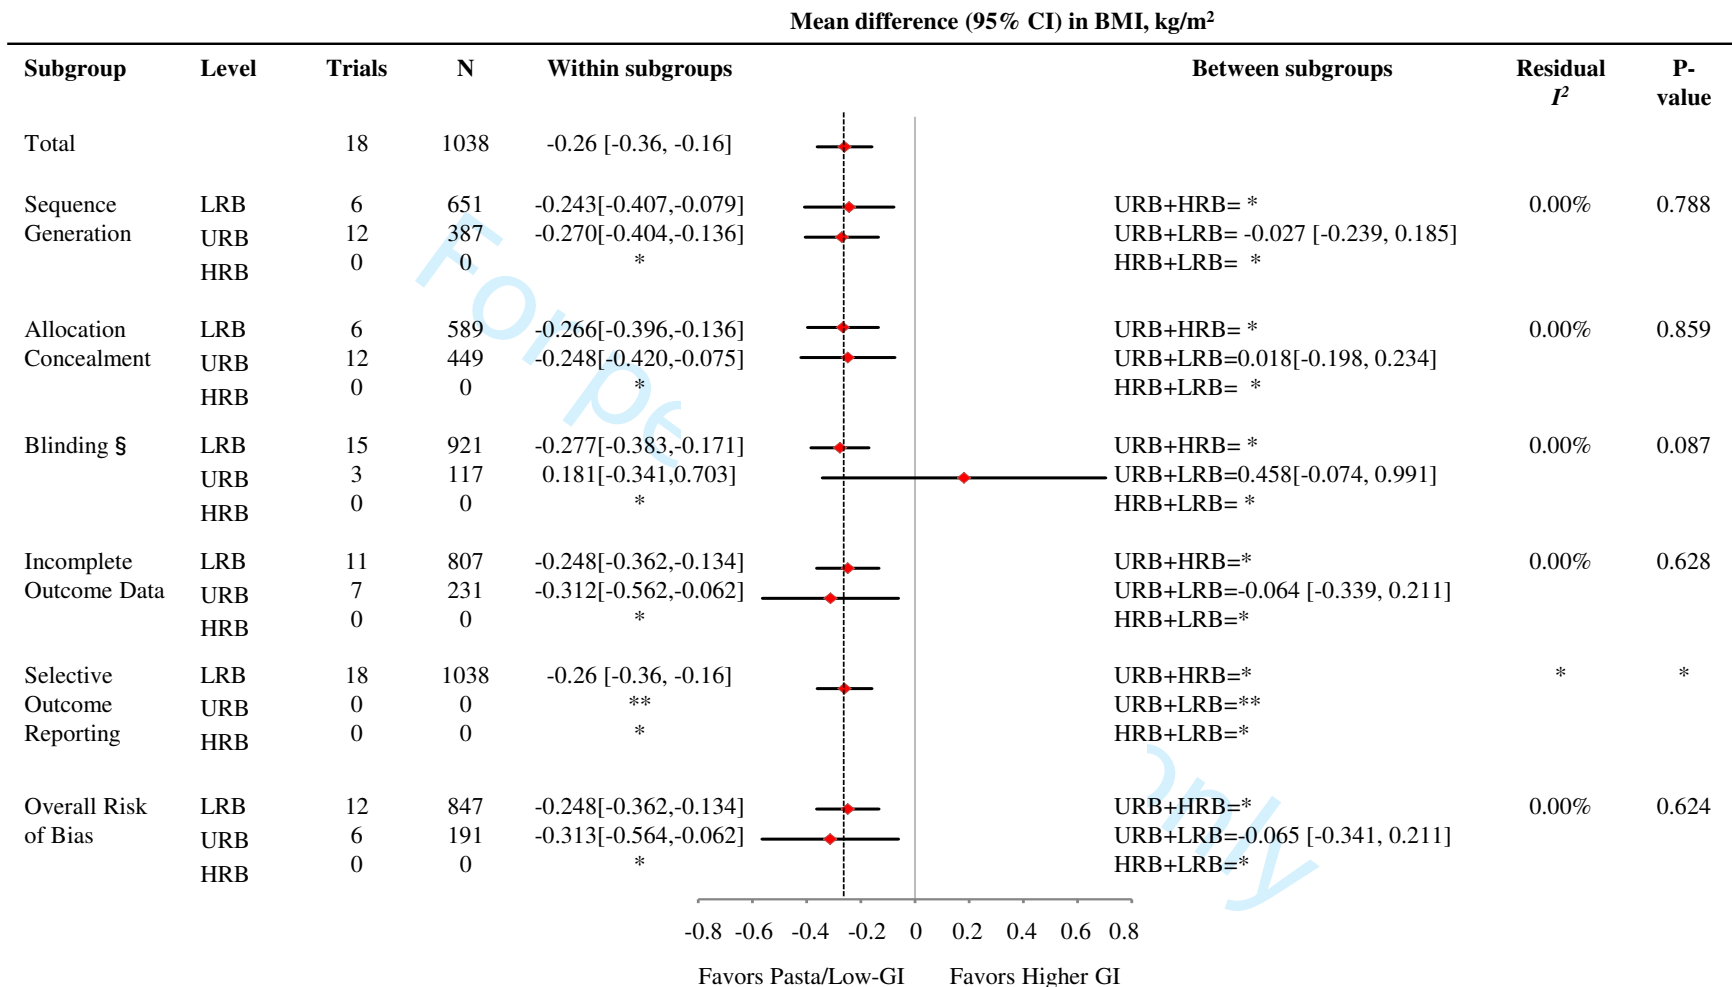

**Supplemental Figure S15: A priori subgroup analyses on risk of bias for mean differences (95% CIs) of the effect of pasta in the context of low-GI dietary patterns on body mass index, BMI (kg/m<sup>2</sup>) (n = 1038)**

1  
2  
3 The dashed line represents the pooled estimate for the overall primary analysis of pasta in the context of low-GI dietary patterns on  
4 BMI. Within subgroup mean differences are the pooled effect estimates represented by a diamond. 95% CIs are represented by the line  
5 through the square. The residual  $I^2$  was estimated with the use of the Cochran's Q statistic and indicates the between study  
6 heterogeneity unexplained by the variability in response because of the specific between studies factor.  $P < 0.05$  indicated that the  
7 effect size differed between levels of the subgroup.  
8  
9

10 \*Within and between subgroup analyses could not be performed against HRB since no values for HRB subgroup.

11 \*\* no values for URB subgroup.

12 § Blinding of Participants, Personnel, and Outcome Assessors.  
13  
14

15 BMI, body mass index; CI, confidence interval; HRB, High Risk of Bias; GI, glycemic index; LRB, Low Risk of Bias; URB, Unclear  
16 Risk of Bias.  
17  
18  
19  
20  
21  
22  
23  
24  
25  
26  
27  
28  
29  
30  
31  
32  
33  
34  
35  
36  
37  
38  
39  
40  
41  
42  
43  
44  
45  
46  
47



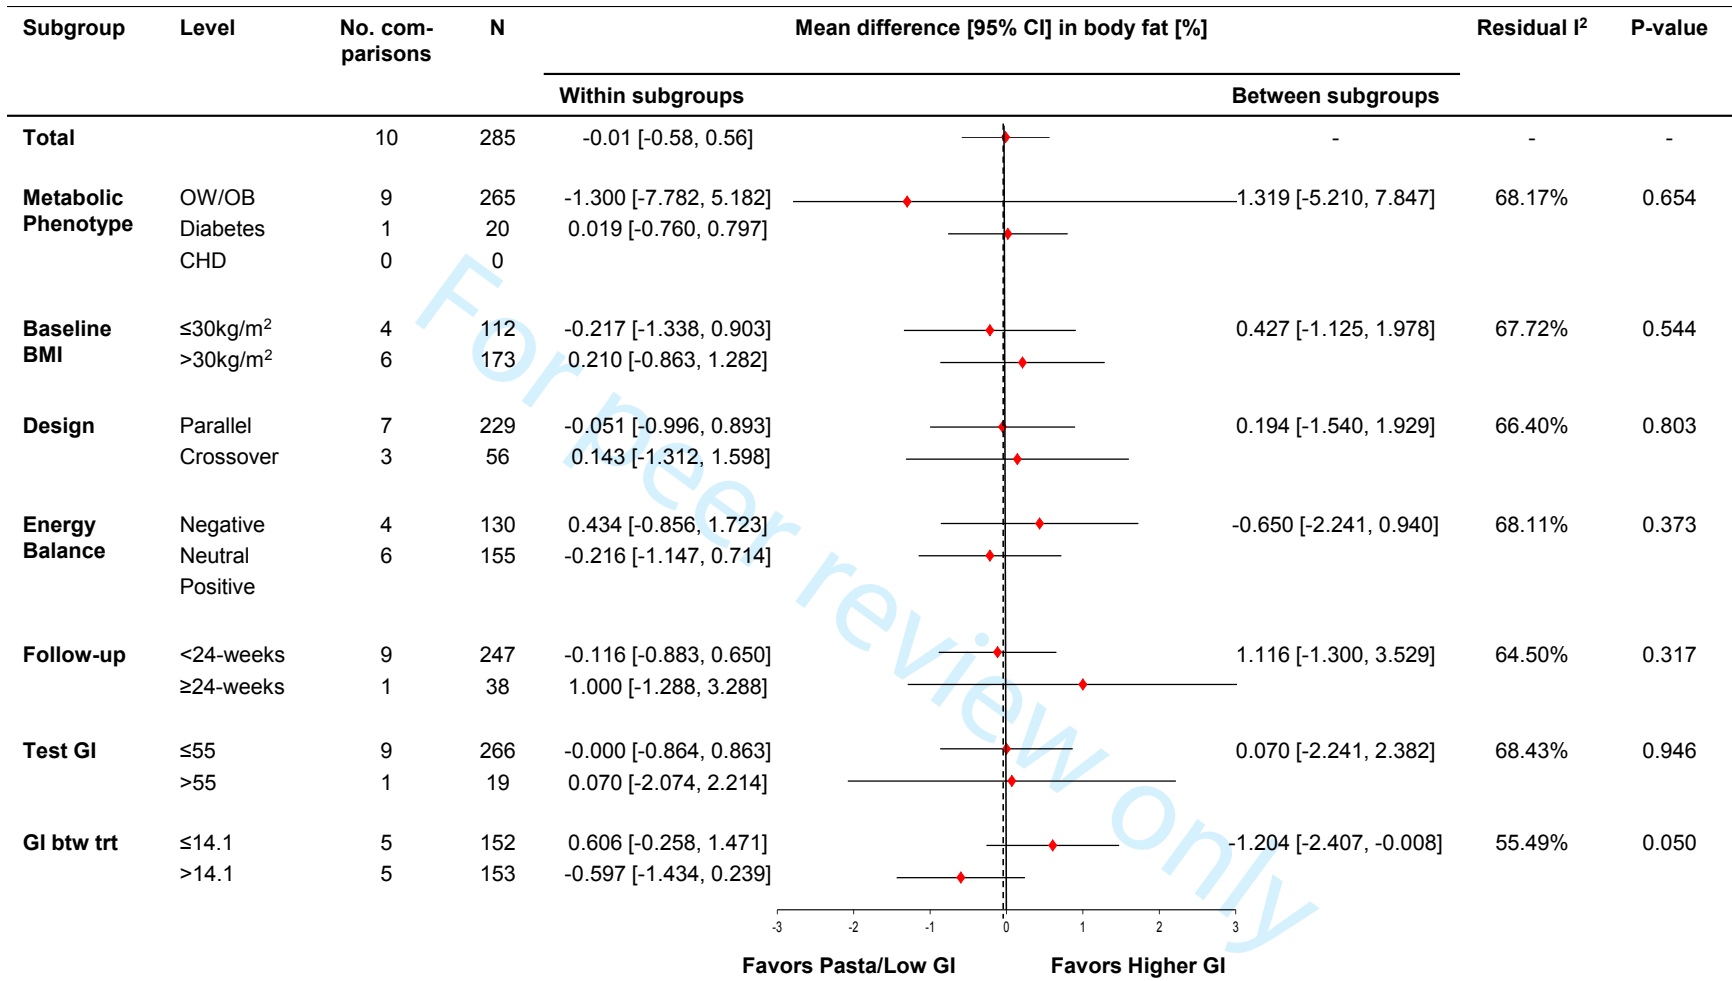

Supplemental Figure S16: Subgroup analysis for mean differences (95% CIs) of the effects of pasta in the context of low-GI dietary patterns on body fat (%) (n = 285)

1  
2  
3 The dashed line represents the pooled estimate for the overall primary analysis of pasta in the context of low-GI dietary patterns on  
4 body fat. Within subgroup mean differences are the pooled effect estimates represented by a diamond. 95% CIs are represented by the  
5 line through the square. The residual  $I^2$  was estimated with the use of the Cochran's Q statistic and indicates the between study  
6 heterogeneity unexplained by the variability in response because of the specific between studies factor.  $P < 0.05$  indicated that the  
7 effect size differed between levels of the subgroup. Within and between-treatment changes were categorically assessed based on the  
8 median intakes. There were less than 10 trials available for categorical subgroup assessment for dose (n=3), test carbohydrate, protein  
9 and fat (n=9), carbohydrate, protein and fat within treatment (n=4), carbohydrate, protein and fat between treatment (n=9), test fibre  
10 (n=8), fibre within treatment (n=4), fibre between treatment (n=8), test saturated fat (n=3 trials), saturated fat within treatment (n=2  
11 trials) and saturated fat between treatments (n=3 trials), therefore analyses were not performed.  
12  
13  
14  
15

16 BMI, body mass index; btw, between; CHO, carbohydrate; CI = confidence interval; GI, glycemic index (glucose scale); OB, obese;  
17 OW, overweight; trt, treatment.  
18  
19  
20  
21  
22  
23  
24  
25  
26  
27  
28  
29  
30  
31  
32  
33  
34  
35  
36  
37  
38  
39  
40  
41  
42  
43  
44  
45  
46  
47

1  
2  
3  
4  
5  
6  
7  
8  
9  
10  
11  
12  
13  
14  
15  
16  
17  
18  
19  
20  
21  
22  
23  
24  
25  
26  
27  
28  
29  
30  
31  
32  
33  
34  
35  
36  
37  
38  
39  
40  
41  
42  
43  
44  
45  
46  
47

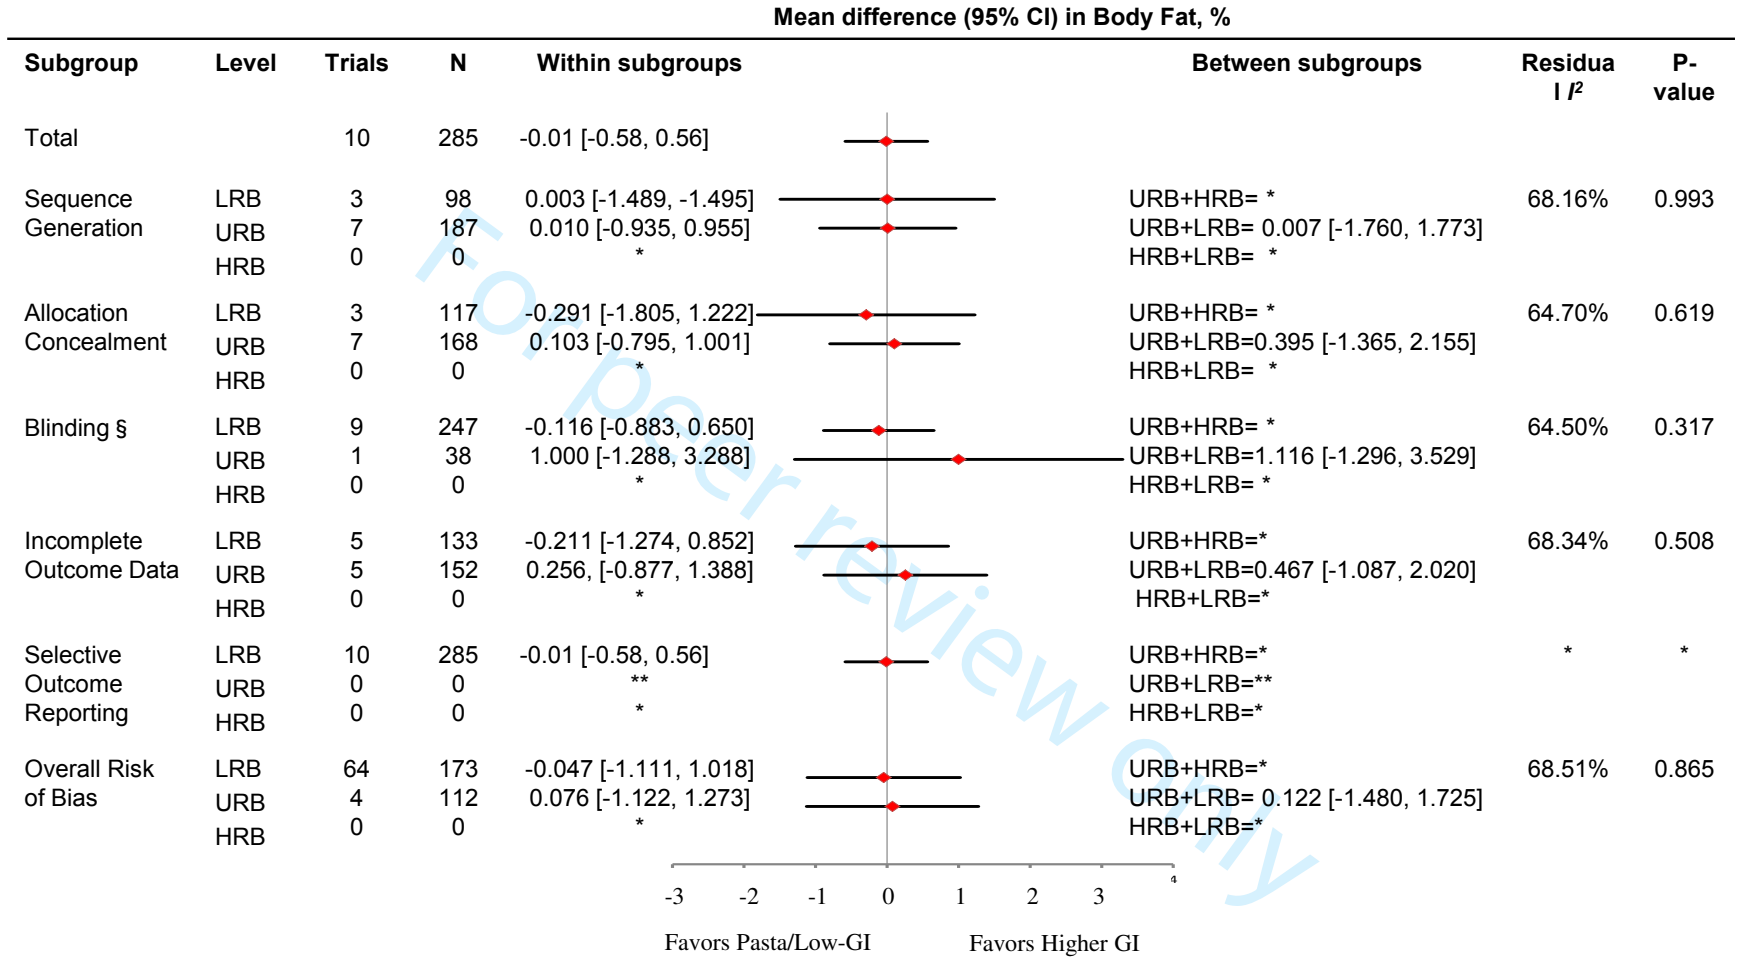

**Supplemental Figure S17: A priori subgroup analyses on risk of bias for mean differences (95% CIs) of the effect of pasta in the context of low-GI dietary patterns on body fat (%) (n = 285)**

1  
2  
3 The dashed line represents the pooled estimate for the overall primary analysis of pasta in the context of low-GI dietary patterns on  
4 body fat. Within subgroup mean differences are the pooled effect estimates represented by a diamond. 95% CIs are represented by the  
5 line through the square. The residual  $I^2$  was estimated with the use of the Cochran's Q statistic and indicates the between study  
6 heterogeneity unexplained by the variability in response because of the specific between studies factor.  $P < 0.05$  indicated that the  
7 effect size differed between levels of the subgroup.  
8  
9

10 \*Within and between subgroup analyses could not be performed against HRB since no values for HRB subgroup.

11 \*\* no values for URB subgroup.

12 § Blinding of Participants, Personnel, and Outcome Assessors.  
13  
14

15 CI, confidence interval; HRB, High Risk of Bias; GI, glycemic index; LRB, Low Risk of Bias; URB, Unclear Risk of Bias  
16  
17  
18  
19  
20  
21  
22  
23  
24  
25  
26  
27  
28  
29  
30  
31  
32  
33  
34  
35  
36  
37  
38  
39  
40  
41  
42  
43  
44  
45  
46  
47

1  
2  
3  
4  
5  
6  
7  
8  
9  
10  
11  
12  
13  
14  
15  
16  
17  
18  
19  
20  
21  
22  
23  
24  
25  
26  
27  
28  
29  
30  
31  
32  
33  
34  
35  
36  
37  
38  
39  
40  
41  
42  
43  
44  
45  
46  
47

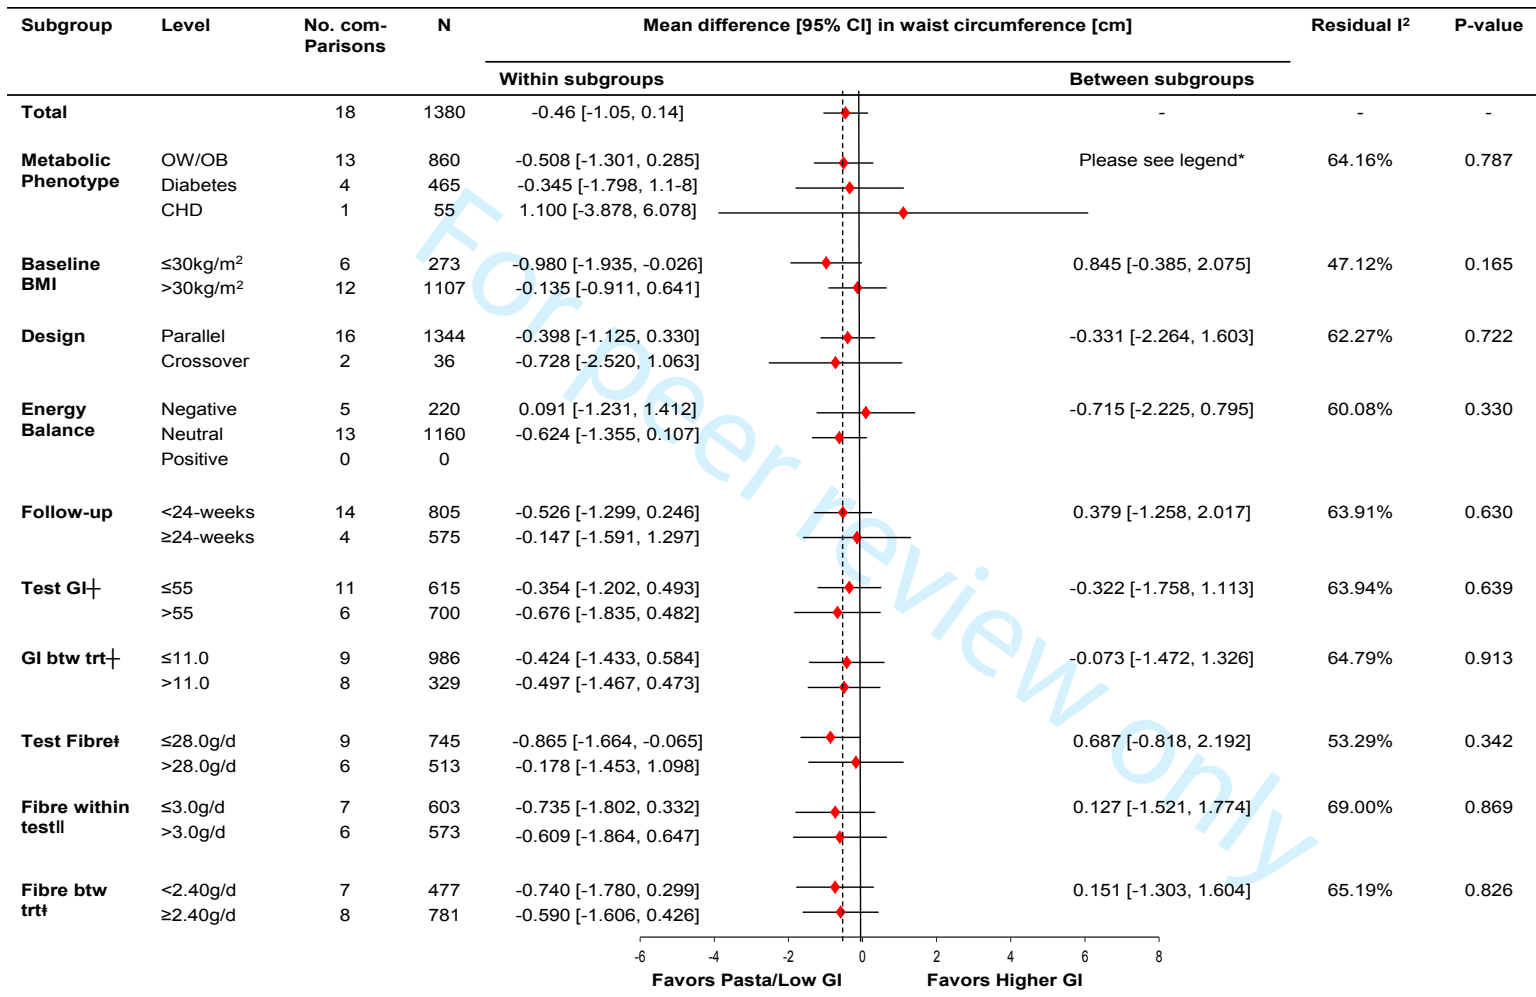

**Supplemental Figure S18: Subgroup analysis for mean differences (95% CIs) of the effects of pasta in the context of low-GI dietary patterns on waist circumference (cm) (n = 1380)**

1  
2  
3 The dashed line represents the pooled estimate for the overall primary analysis of pasta in the context of low-GI dietary patterns on  
4 waist circumference. Within subgroup mean differences are the pooled effect estimates represented by a diamond. 95% CIs are  
5 represented by the line through the square. The residual  $I^2$  was estimated with the use of the Cochran's Q statistic and indicates the  
6 between study heterogeneity unexplained by the variability in response because of the specific between studies factor.  $P < 0.05$   
7 indicated that the effect size differed between levels of the subgroup. Within and between-treatment changes were categorically  
8 assessed based on the median intakes. There were less than 10 trials available for categorical subgroup assessment for dose (n=2  
9 trials), therefore analyses were not performed.  
10  
11

12 \*Pairwise between-subgroup mean differences (95% CIs) for Metabolic Phenotype were as follows: 0.163cm (-1.492, 1.818) (1 vs. 2)  
13 to 1.608cm (-3.432, 6.648) (1 vs. 3) to -1.445cm (-6.630, 3.740) (2 vs. 3).

14 † data available on 17 studies

15 ‡ data available on 15 studies  
16  
17

18 BMI, body mass index; btw, between; CI = confidence interval; GI, glycemic index (glucose scale); OB, obese; OW, overweight; trt,  
19 treatment.  
20  
21  
22  
23  
24  
25  
26  
27  
28  
29  
30  
31  
32  
33  
34  
35  
36  
37  
38  
39  
40  
41  
42  
43  
44  
45  
46  
47

1  
2  
3  
4  
5  
6  
7  
8  
9  
10  
11  
12  
13  
14  
15  
16  
17  
18  
19  
20  
21  
22  
23  
24  
25  
26  
27  
28  
29  
30  
31  
32  
33  
34  
35  
36  
37  
38  
39  
40  
41  
42  
43  
44  
45  
46  
47

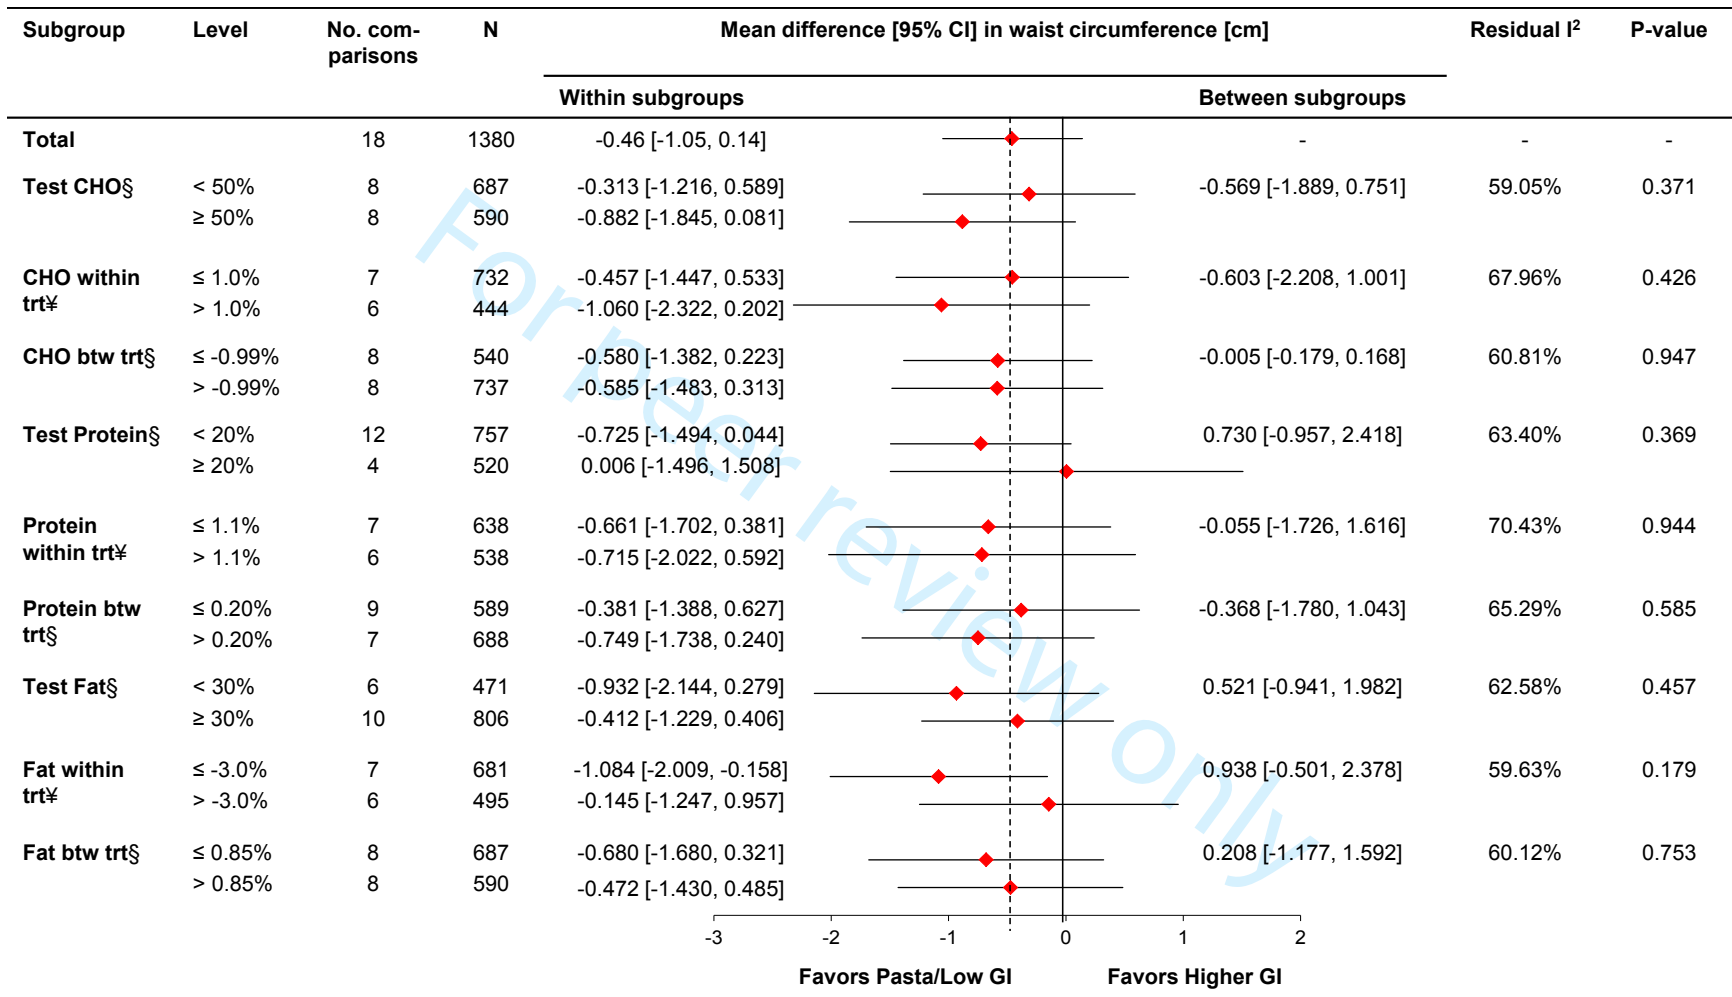

**Supplemental Figure S19: Subgroup analysis for mean differences (95% CIs) of the effects of pasta in the context of low-GI dietary patterns on waist circumference (cm) continued (n = 1380)**

1  
2  
3 The dashed line represents the pooled estimate for the overall primary analysis of pasta in the context of low-GI dietary patterns on  
4 waist circumference. Within subgroup mean differences are the pooled effect estimates represented by a diamond. 95% CIs are  
5 represented by the line through the square. The residual  $I^2$  was estimated with the use of the Cochran's Q statistic and indicates the  
6 between study heterogeneity unexplained by the variability in response because of the specific between studies factor.  $P < 0.05$   
7 indicated that the effect size differed between levels of the subgroup. Within and between-treatment changes were categorically  
8 assessed based on the median intakes. There were less than 10 trials available for categorical subgroup assessment for test saturated fat  
9 (n=8 trials), saturated fat within treatment (n=7 trials) and saturated fat between treatments (n=8 trials), therefore analyses were not  
10 performed.  
11  
12

13 § data available on 16 studies

14 ¥ data available on 13 studies

15  
16  
17 BMI, body mass index; btw, between; CHO, carbohydrate; CI = confidence interval; GI, glycemic index (glucose scale); trt, treatment.  
18  
19  
20  
21  
22  
23  
24  
25  
26  
27  
28  
29  
30  
31  
32  
33  
34  
35  
36  
37  
38  
39  
40  
41  
42  
43  
44  
45  
46  
47



1  
2  
3  
4  
5  
6  
7  
8  
9  
10  
11  
12  
13  
14  
15  
16  
17  
18  
19  
20  
21  
22  
23  
24  
25  
26  
27  
28  
29  
30  
31  
32  
33  
34  
35  
36  
37  
38  
39  
40  
41  
42  
43  
44  
45  
46  
47

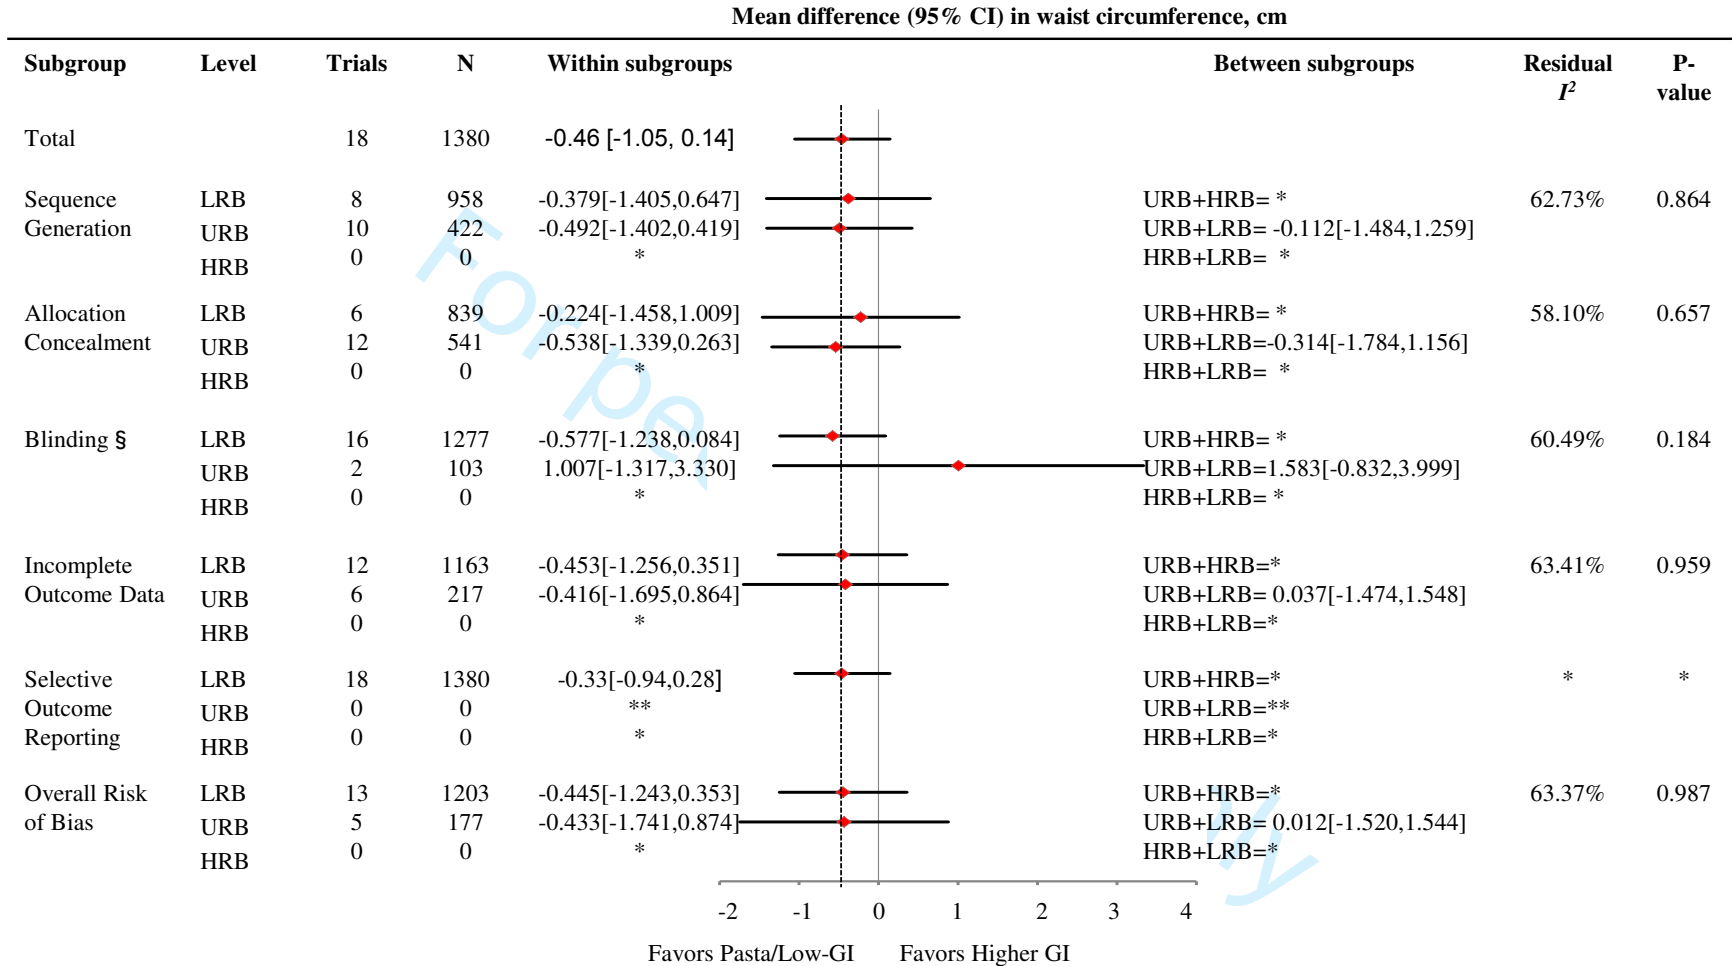

**Supplemental Figure S20: A priori subgroup analyses on risk of bias for mean differences (95% CIs) of the effect of pasta in the context of low-GI dietary patterns on waist circumference (cm) (n = 1380)**

1  
2  
3 The dashed line represents the pooled estimate for the overall primary analysis of pasta in the context of low-GI dietary patterns on  
4 waist circumference. Within subgroup mean differences are the pooled effect estimates represented by a diamond. 95% CIs are  
5 represented by the line through the square. The residual  $I^2$  was estimated with the use of the Cochran's Q statistic and indicates the  
6 between study heterogeneity unexplained by the variability in response because of the specific between studies factor.  $P < 0.05$   
7 indicated that the effect size differed between levels of the subgroup.  
8  
9

10 \*Within and between subgroup analyses could not be performed against HRB since no values for HRB subgroup.

11 \*\* no values for URB subgroup.

12 § Blinding of Participants, Personnel, and Outcome Assessors.  
13  
14

15 CI, confidence interval; HRB, High Risk of Bias; GI, glycemic index; LRB, Low Risk of Bias; URB, Unclear Risk of Bias  
16  
17  
18  
19  
20  
21  
22  
23  
24  
25  
26  
27  
28  
29  
30  
31  
32  
33  
34  
35  
36  
37  
38  
39  
40  
41  
42  
43  
44  
45  
46  
47

1  
2  
3  
4  
5  
6  
7  
8  
9  
10  
11  
12  
13  
14  
15  
16  
17  
18  
19  
20  
21  
22  
23  
24  
25  
26  
27  
28  
29  
30  
31  
32  
33  
34  
35  
36  
37  
38  
39  
40  
41  
42  
43  
44  
45  
46  
47  
48  
49  
50  
51  
52  
53  
54  
55  
56  
57  
58  
59  
60

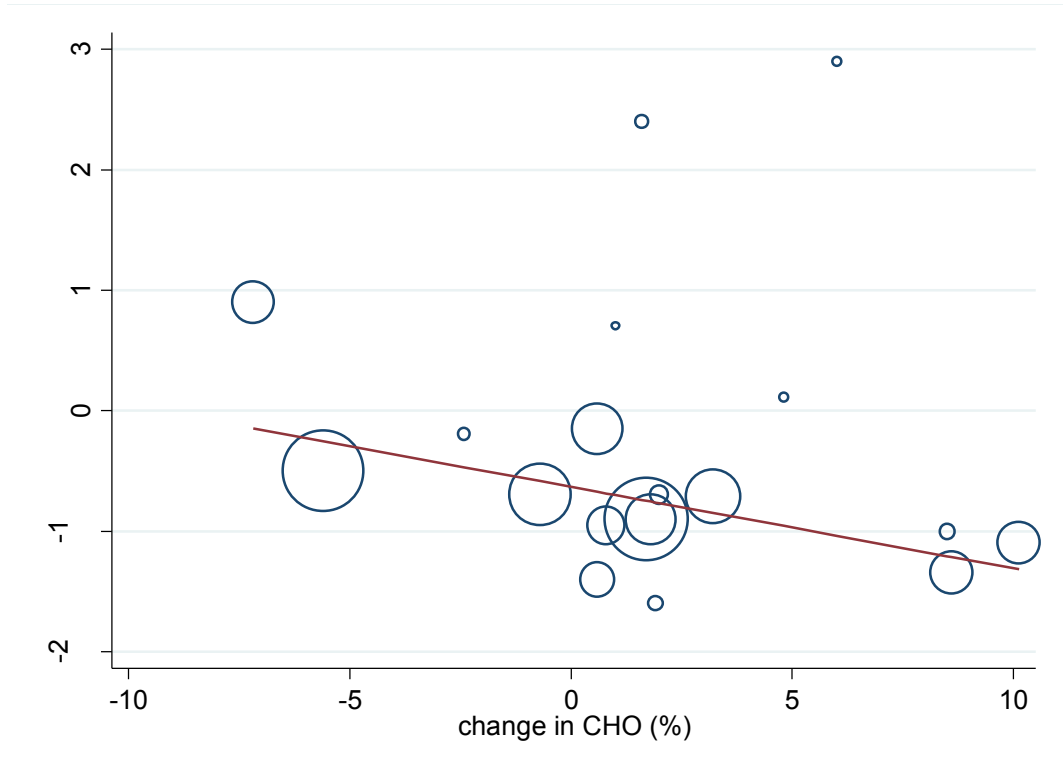

**Supplemental Figure S21: Continuous meta-regression of change in carbohydrate intake in the low-GI dietary pattern intervention arms with change in body weight (n=19)**  
CHO, carbohydrate; MD, mean difference

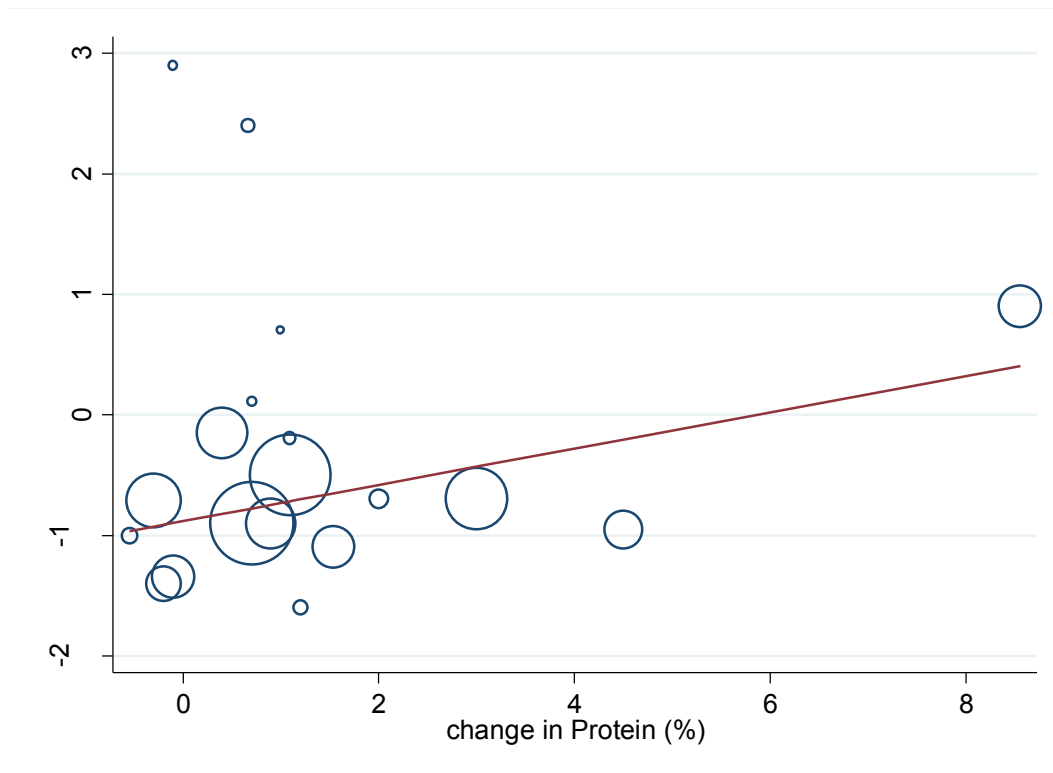

**Supplemental Figure S22: Continuous meta-regression of change in protein intake in the low-GI dietary pattern intervention arms with change in body weight (n=19)**  
 MD, mean difference

review only

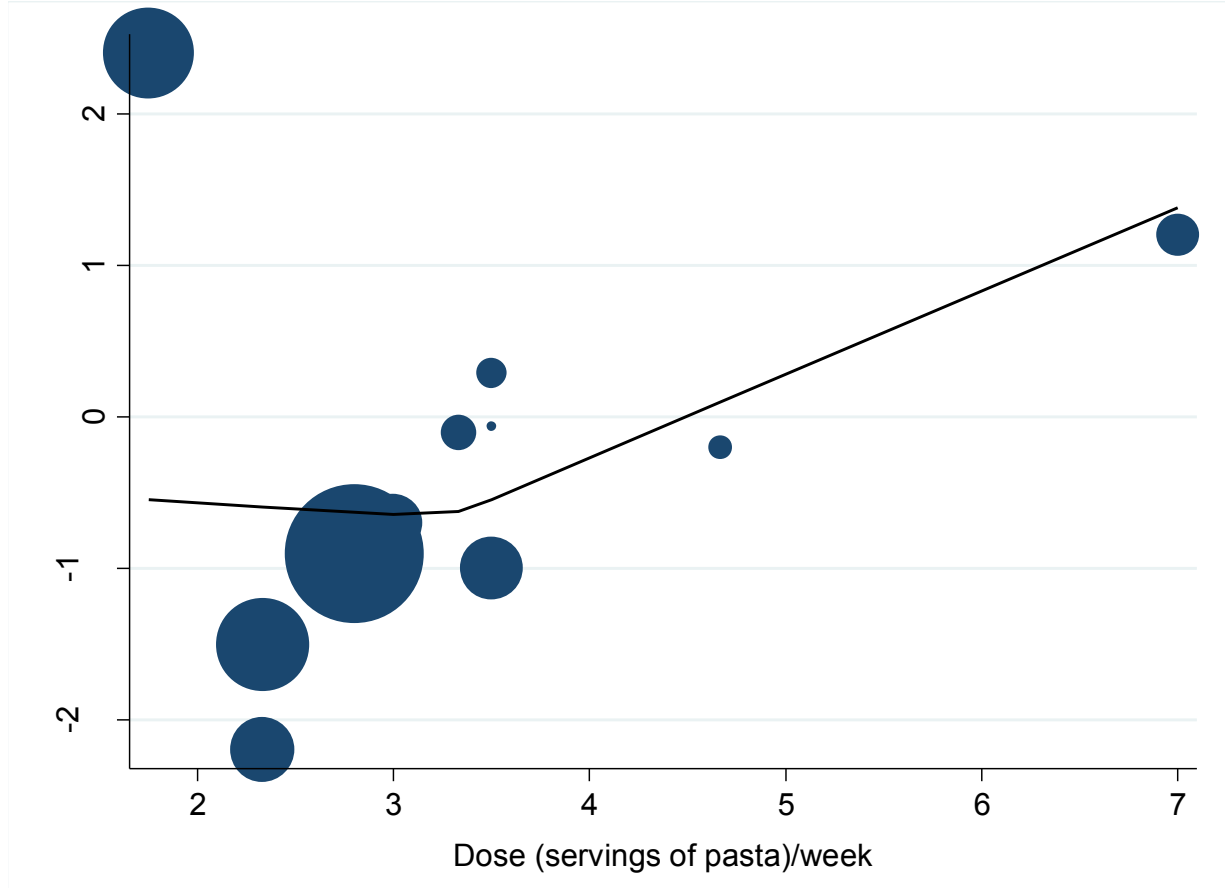

**Supplemental Figure S23: Pasta intake dose-response analyses by spline curve modeling (MKSPLINE procedure)**

view only

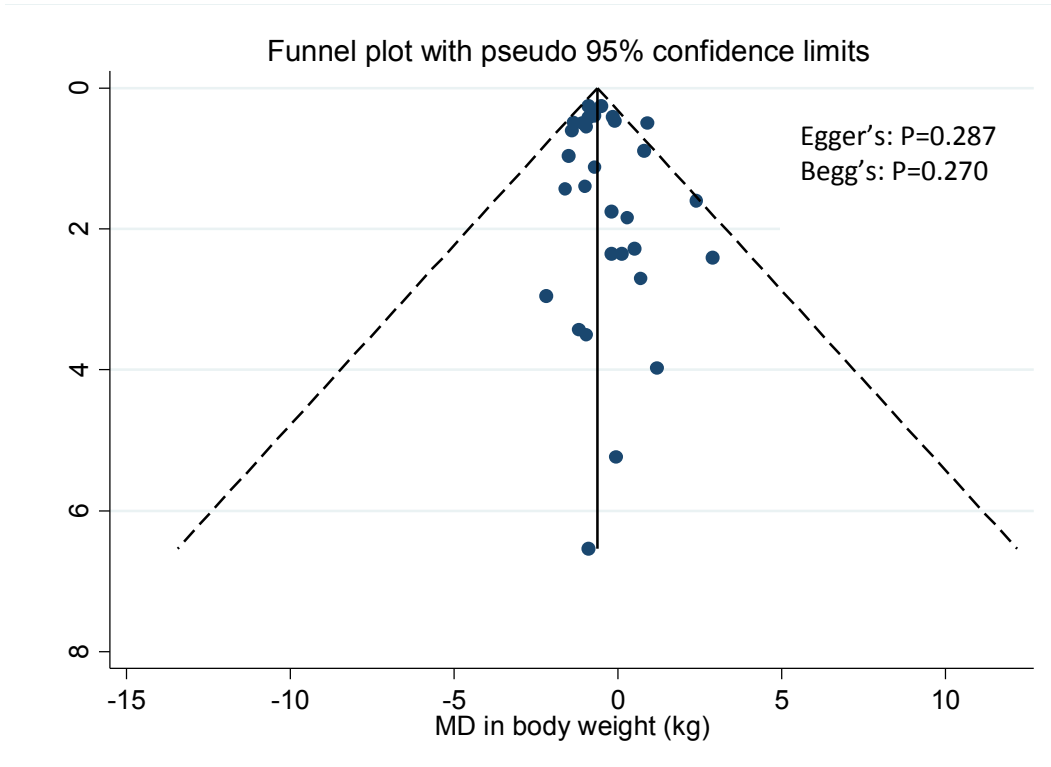

28  
29  
30

**Supplemental Figure S24: Funnel plot for the effect of pasta in the context of low-GI dietary patterns on body weight (kg)**

31  
32  
33  
34  
35  
36  
37  
38  
39  
40  
41  
42  
43  
44  
45  
46  
47  
48  
49  
50  
51  
52  
53  
54  
55  
56  
57  
58  
59  
60

The solid line represents the overall pooled estimate for all studies included in the meta-analysis expressed as a weighted mean difference. Dashed lines represent 95% CIs. P values are derived from the quantitative assessment of publication bias by Egger's and Begg's tests.

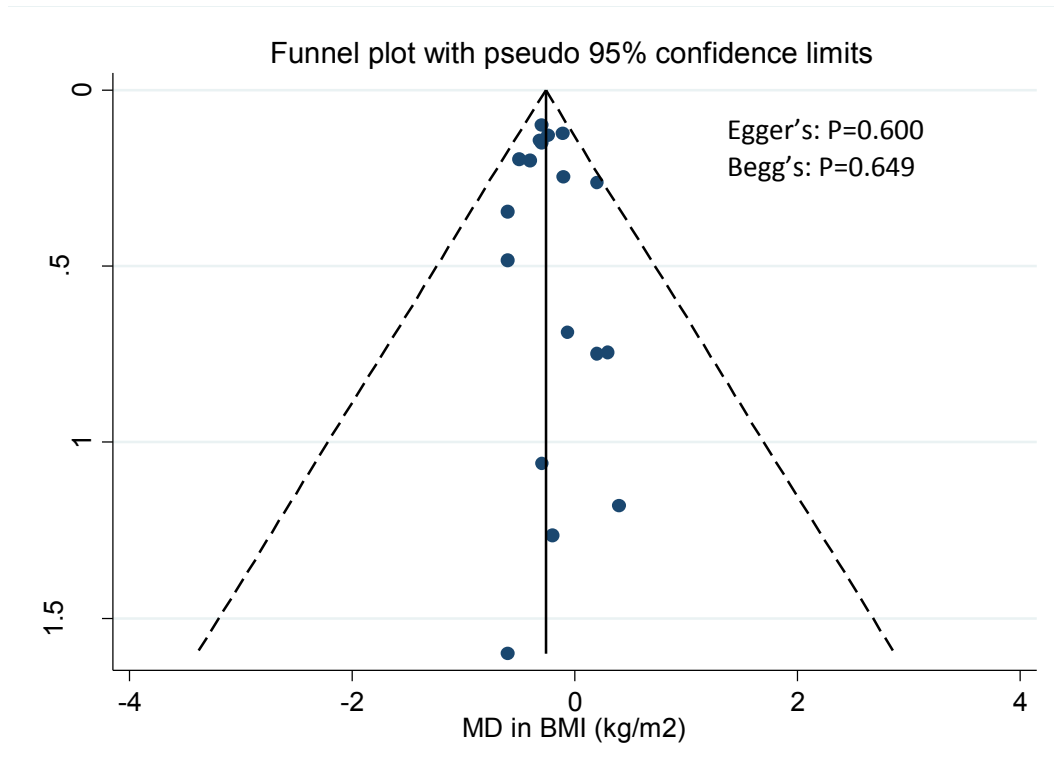

28  
29  
30  
31

**Supplemental Figure S25: Funnel plot for the effect of pasta in the context of low-GI dietary patterns on BMI (kg/m<sup>2</sup>)**

32  
33  
34  
35  
36  
37  
38  
39  
40  
41  
42  
43  
44  
45  
46  
47  
48  
49  
50  
51  
52  
53  
54  
55  
56  
57

The solid line represents the overall pooled estimate for all studies included in the meta-analysis expressed as a weighted mean difference. Dashed lines represent 95% CIs. P values are derived from the quantitative assessment of publication bias by Egger's and Begg's tests.

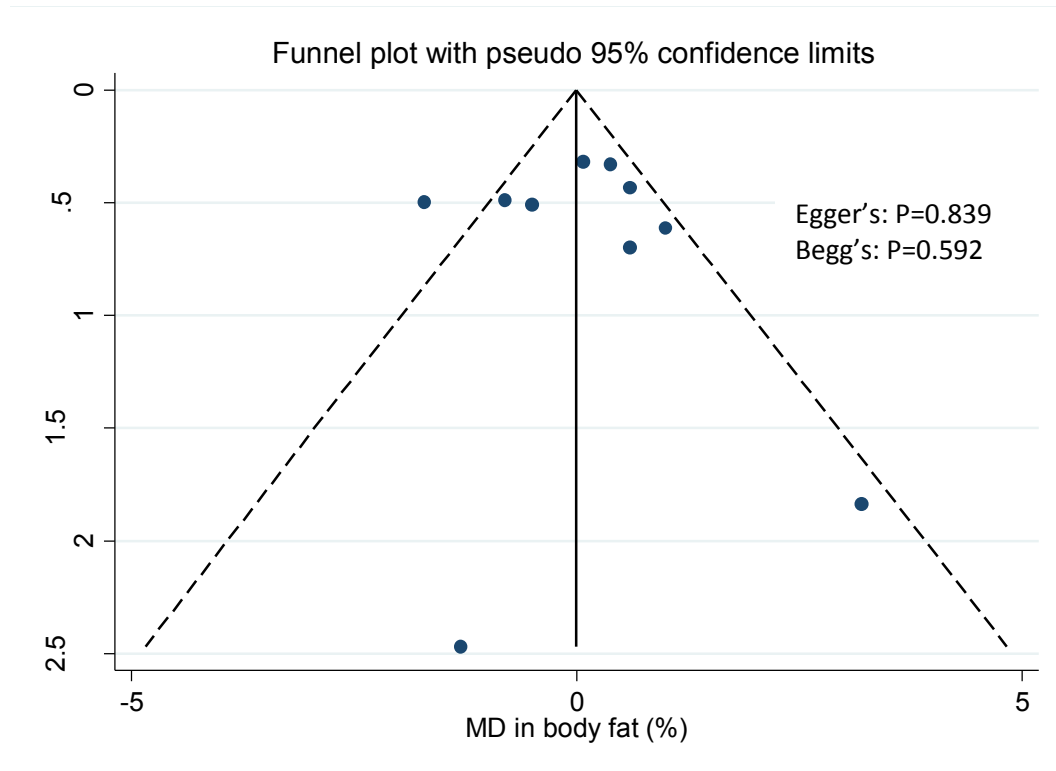

28  
29  
30  
31  
32

**Supplemental Figure S26: Funnel plot for the effect of pasta in the context of low-GI dietary patterns on body fat (%)**

33  
34  
35  
36  
37  
38  
39  
40  
41  
42  
43  
44  
45  
46  
47  
48  
49  
50  
51  
52  
53  
54  
55  
56  
57  
58  
59  
60

The solid line represents the overall pooled estimate for all studies included in the meta-analysis expressed as a weighted mean difference. Dashed lines represent 95% CIs. P values are derived from the quantitative assessment of publication bias by Egger's and Begg's tests.



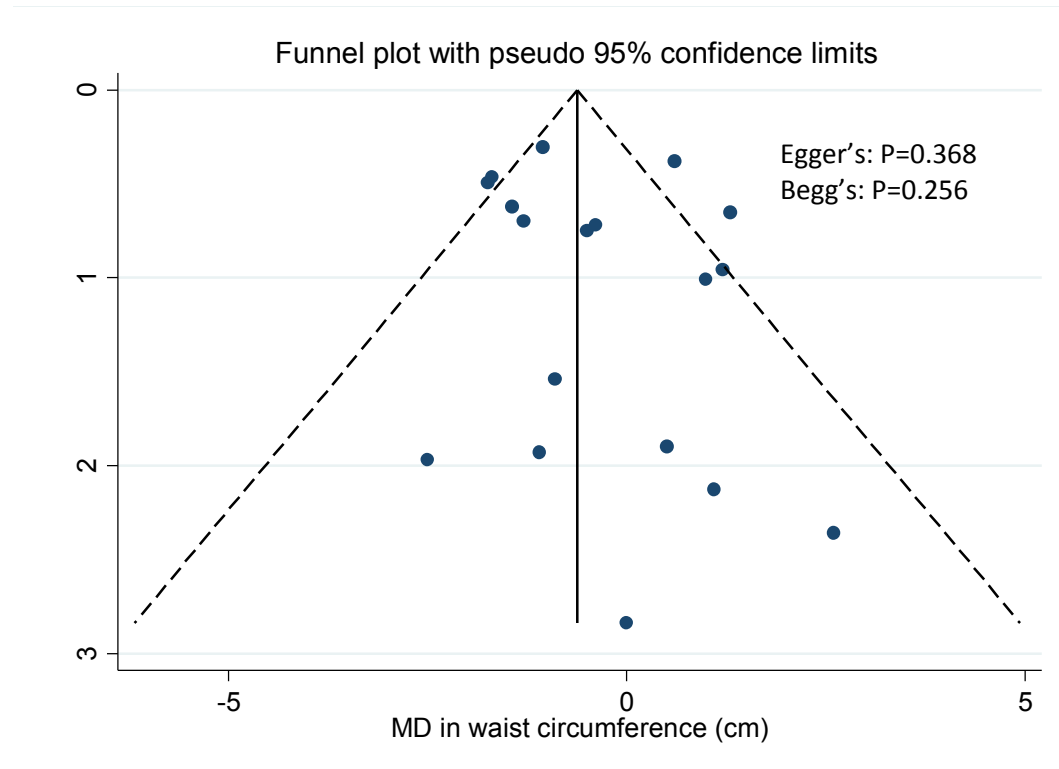

29  
30  
31  
32

**Supplemental Figure S27: Funnel plot for the effect of pasta in the context of low-GI dietary patterns on waist circumference (cm)**

33  
34  
35  
36  
37  
38  
39  
40  
41  
42  
43  
44  
45  
46  
47  
48  
49  
50  
51  
52  
53  
54  
55  
56  
57  
58  
59  
60

The solid line represents the overall pooled estimate for all studies included in the meta-analysis expressed as a weighted mean difference. Dashed lines represent 95% CIs. P values are derived from the quantitative assessment of publication bias by Egger's and Begg's tests.

## Supplemental Table S1: PRISMA Checklist

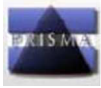

## PRISMA 2009 Checklist

| Section/topic             | #  | Checklist item                                                                                                                                                                                                                                                                                              | Reported on page #         |
|---------------------------|----|-------------------------------------------------------------------------------------------------------------------------------------------------------------------------------------------------------------------------------------------------------------------------------------------------------------|----------------------------|
| <b>TITLE</b>              |    |                                                                                                                                                                                                                                                                                                             |                            |
| Title                     | 1  | Identify the report as a systematic review, meta-analysis, or both.                                                                                                                                                                                                                                         | 1                          |
| <b>ABSTRACT</b>           |    |                                                                                                                                                                                                                                                                                                             |                            |
| Structured summary        | 2  | Provide a structured summary including, as applicable: background; objectives; data sources; study eligibility criteria, participants, and interventions; study appraisal and synthesis methods; results; limitations; conclusions and implications of key findings; systematic review registration number. | 2-3                        |
| <b>INTRODUCTION</b>       |    |                                                                                                                                                                                                                                                                                                             |                            |
| Rationale                 | 3  | Describe the rationale for the review in the context of what is already known.                                                                                                                                                                                                                              | 5                          |
| Objectives                | 4  | Provide an explicit statement of questions being addressed with reference to participants, interventions, comparisons, outcomes, and study design (PICOS).                                                                                                                                                  | 5                          |
| <b>METHODS</b>            |    |                                                                                                                                                                                                                                                                                                             |                            |
| Protocol and registration | 5  | Indicate if a review protocol exists, if and where it can be accessed (e.g., Web address), and, if available, provide registration information including registration number.                                                                                                                               | 6                          |
| Eligibility criteria      | 6  | Specify study characteristics (e.g., PICOS, length of follow-up) and report characteristics (e.g., years considered, language, publication status) used as criteria for eligibility, giving rationale.                                                                                                      | 6-7, Supplemental Table S2 |
| Information sources       | 7  | Describe all information sources (e.g., databases with dates of coverage, contact with study authors to identify additional studies) in the search and date last searched.                                                                                                                                  | 6, Supplemental Table S1   |
| Search                    | 8  | Present full electronic search strategy for at least one database, including any limits used, such that it could be repeated.                                                                                                                                                                               | Supplemental Table S1      |
| Study selection           | 9  | State the process for selecting studies (i.e., screening, eligibility, included in systematic review, and, if applicable, included in the meta-analysis).                                                                                                                                                   | 6-7, Figure 1              |
| Data collection process   | 10 | Describe method of data extraction from reports (e.g., piloted forms, independently, in duplicate) and any processes for obtaining and confirming data from investigators.                                                                                                                                  | 7                          |
| Data items                | 11 | List and define all variables for which data were sought (e.g., PICOS, funding sources) and any assumptions and                                                                                                                                                                                             | 7, Supplemental            |

|                                    |    |                                                                                                                                                                                                                        |          |
|------------------------------------|----|------------------------------------------------------------------------------------------------------------------------------------------------------------------------------------------------------------------------|----------|
|                                    |    | simplifications made.                                                                                                                                                                                                  | Table S2 |
| Risk of bias in individual studies | 12 | Describe methods used for assessing risk of bias of individual studies (including specification of whether this was done at the study or outcome level), and how this information is to be used in any data synthesis. | 7        |
| Summary measures                   | 13 | State the principal summary measures (e.g., risk ratio, difference in means).                                                                                                                                          | 8        |
| Synthesis of results               | 14 | Describe the methods of handling data and combining results of studies, if done, including measures of consistency (e.g., $I^2$ ) for each meta-analysis.                                                              | 8-10     |

| Section/topic                 | #  | Checklist item                                                                                                                                                                                           | Reported on page #                             |
|-------------------------------|----|----------------------------------------------------------------------------------------------------------------------------------------------------------------------------------------------------------|------------------------------------------------|
| Risk of bias across studies   | 15 | Specify any assessment of risk of bias that may affect the cumulative evidence (e.g., publication bias, selective reporting within studies).                                                             | 10                                             |
| Additional analyses           | 16 | Describe methods of additional analyses (e.g., sensitivity or subgroup analyses, meta-regression), if done, indicating which were pre-specified.                                                         | 8-10                                           |
| <b>RESULTS</b>                |    |                                                                                                                                                                                                          |                                                |
| Study selection               | 17 | Give numbers of studies screened, assessed for eligibility, and included in the review, with reasons for exclusions at each stage, ideally with a flow diagram.                                          | 11, Figure 1                                   |
| Study characteristics         | 18 | For each study, present characteristics for which data were extracted (e.g., study size, PICOS, follow-up period) and provide the citations.                                                             | 11-12, Table 1, Supplemental Tables S2-S3      |
| Risk of bias within studies   | 19 | Present data on risk of bias of each study and, if available, any outcome level assessment (see item 12).                                                                                                | 12, Supplemental Figures S1-S2                 |
| Results of individual studies | 20 | For all outcomes considered (benefits or harms), present, for each study: (a) simple summary data for each intervention group (b) effect estimates and confidence intervals, ideally with a forest plot. | 12-13, Figures 2-3, Supplemental Figures S3-S7 |
| Synthesis of results          | 21 | Present results of each meta-analysis done, including confidence intervals and measures of consistency.                                                                                                  | 12-13, Figures 2-3, Supplemental Figures S3-S7 |
| Risk of bias across studies   | 22 | Present results of any assessment of risk of bias across studies (see item 15).                                                                                                                          | 12,16 Supplemental                             |

|                     |    |                                                                                                                                                                                      |                                                                |
|---------------------|----|--------------------------------------------------------------------------------------------------------------------------------------------------------------------------------------|----------------------------------------------------------------|
|                     |    |                                                                                                                                                                                      | Table S1, S2, S12, S15, S17, S20                               |
| Additional analysis | 23 | Give results of additional analyses, if done (e.g., sensitivity or subgroup analyses, meta-regression [see Item 16]).                                                                | 13-16, Supplemental Tables S4-S10, Supplemental Figures S8-S26 |
| <b>DISCUSSION</b>   |    |                                                                                                                                                                                      |                                                                |
| Summary of evidence | 24 | Summarize the main findings including the strength of evidence for each main outcome; consider their relevance to key groups (e.g., healthcare providers, users, and policy makers). | 17-20                                                          |
| Limitations         | 25 | Discuss limitations at study and outcome level (e.g., risk of bias), and at review-level (e.g., incomplete retrieval of identified research, reporting bias).                        | 20-22                                                          |
| Conclusions         | 26 | Provide a general interpretation of the results in the context of other evidence, and implications for future research.                                                              | 22-24                                                          |
| <b>FUNDING</b>      |    |                                                                                                                                                                                      |                                                                |
| Funding             | 27 | Describe sources of funding for the systematic review and other support (e.g., supply of data); role of funders for the systematic review.                                           | 27-28                                                          |

From: Moher D, Liberati A, Tetzlaff J, Altman DG, The PRISMA Group (2009). Preferred Reporting Items for Systematic Reviews and Meta-Analyses: The PRISMA Statement. PLoS Med 6(7): e1000097. doi:10.1371/journal.pmed1000097

For more information, visit: [www.prisma-statement.org](http://www.prisma-statement.org).

# BMJ Open

## Effect of Pasta in the Context of Low Glycemic Index Dietary Patterns on Body Weight and Markers of Adiposity: A Systematic Review and Meta-analysis of Randomized Controlled Trials in Adults

|                                 |                                                                                                                                                                                                                                                                                                                                                                                                                                                                                                                                                                                                                                                                                                                                                                                                                                                                                                                                                                                                |
|---------------------------------|------------------------------------------------------------------------------------------------------------------------------------------------------------------------------------------------------------------------------------------------------------------------------------------------------------------------------------------------------------------------------------------------------------------------------------------------------------------------------------------------------------------------------------------------------------------------------------------------------------------------------------------------------------------------------------------------------------------------------------------------------------------------------------------------------------------------------------------------------------------------------------------------------------------------------------------------------------------------------------------------|
| Journal:                        | <i>BMJ Open</i>                                                                                                                                                                                                                                                                                                                                                                                                                                                                                                                                                                                                                                                                                                                                                                                                                                                                                                                                                                                |
| Manuscript ID                   | bmjopen-2017-019438.R2                                                                                                                                                                                                                                                                                                                                                                                                                                                                                                                                                                                                                                                                                                                                                                                                                                                                                                                                                                         |
| Article Type:                   | Research                                                                                                                                                                                                                                                                                                                                                                                                                                                                                                                                                                                                                                                                                                                                                                                                                                                                                                                                                                                       |
| Date Submitted by the Author:   | 26-Jan-2018                                                                                                                                                                                                                                                                                                                                                                                                                                                                                                                                                                                                                                                                                                                                                                                                                                                                                                                                                                                    |
| Complete List of Authors:       | Chiavaroli, Laura; St. Michael's Hospital, Toronto 3D Knowledge Synthesis and Clinical Trials Unit; University of Toronto, Nutritional Sciences<br>Kendall, Cyril; University of Toronto, Nutritional Sciences<br>Braunstein, Catherine; University of Toronto, Nutritional Sciences; St. Michael's Hospital, Toronto 3D Knowledge Synthesis and Clinical Trials Unit<br>Blanco Mejia, Sonia; Clinical Nutrition and Risk Factor Modification Centre, St. Michael's Hospital; Toronto 3D Knowledge Synthesis and Clinical Trials Unit, St. Michael's Hospital<br>Leiter, Lawrence; St. Michael's Hospital, Endocrinology; University of Toronto, Nutritional Sciences<br>Jenkins, David; St. Michael's Hospital, Clinical Nutrition and Risk Factor Modification Center; University of Toronto, Nutritional Sciences<br>Sievenpiper, John; McMaster University, Department of Pathology and Molecular Medicine; St. Michael's Hospital, Clinical Nutrition and Risk Factor Modification Centre |
| <b>Primary Subject Heading</b>: | Nutrition and metabolism                                                                                                                                                                                                                                                                                                                                                                                                                                                                                                                                                                                                                                                                                                                                                                                                                                                                                                                                                                       |
| Secondary Subject Heading:      | Cardiovascular medicine                                                                                                                                                                                                                                                                                                                                                                                                                                                                                                                                                                                                                                                                                                                                                                                                                                                                                                                                                                        |
| Keywords:                       | body weight, pasta, glycemic index, glycaemic index, systematic review and meta-analysis, weight loss                                                                                                                                                                                                                                                                                                                                                                                                                                                                                                                                                                                                                                                                                                                                                                                                                                                                                          |
|                                 |                                                                                                                                                                                                                                                                                                                                                                                                                                                                                                                                                                                                                                                                                                                                                                                                                                                                                                                                                                                                |

SCHOLARONE™  
Manuscripts

1  
2  
3 **1 Effect of Pasta in the Context of Low Glycemic Index Dietary Patterns on Body Weight**  
4 **2 and Markers of Adiposity: A Systematic Review and Meta-analysis of Randomized**  
5 **3 Controlled Trials in Adults**

6  
7  
8 4 Laura Chiavaroli<sup>1,2</sup>, Cyril WC Kendall<sup>1,2,3</sup>, Catherine R Braunstein<sup>1,2</sup>, Sonia Blanco Mejia<sup>1,2</sup>,  
9 5 Lawrence A Leiter<sup>1,2,4-6</sup>, David JA Jenkins<sup>1,2,4-6</sup>, John L Sievenpiper<sup>1,2,4-6</sup>

10  
11 6 1 Department of Nutritional Sciences, University of Toronto, Toronto, Canada

12  
13 7 2 Toronto 3D Knowledge Synthesis and Clinical Trials Unit, St. Michael's Hospital, Toronto,  
14 8 Canada

15  
16 9 3 College of Pharmacy and Nutrition, University of Saskatchewan, Saskatoon, Canada

17  
18 10 4 Department of Medicine, University of Toronto, Toronto, Canada

19  
20 11 5 Li Ka Shing Knowledge Institute, St. Michael's Hospital, Toronto, Canada

21  
22 12 6 Division of Endocrinology and Metabolism, St. Michael's Hospital, Toronto, Canada

23  
24  
25  
26 13

27  
28 14 Corresponding Author:

29  
30 15 Dr. John L Sievenpiper, MD, PhD, FRCPC, St. Michael's Hospital, #6137-61 Queen Street East,  
31 16 Toronto, ON, M5C 2T2, CANADA

32 17 Telephone: +1 416 867 7475; Fax: +1 416 867 7495; Email: [john.sievenpiper@utoronto.ca](mailto:john.sievenpiper@utoronto.ca)

33  
34 18

35  
36 19 Word Count: 5,061

37  
38 20 Tables: 1

39  
40 21 Figures: 3

41  
42 22 Online only supplementary material included

43  
44  
45 23

46 24 **Keywords:** body weight, pasta, glycemic index, glycaemic index, systematic review and meta-

47  
48  
49 25 analysis, weight loss

50  
51 26

52  
53 27

54  
55 28

1  
2  
3 **29 ABSTRACT**  
4

5 **30 Objective:** Carbohydrate staples such as pasta have been implicated in the obesity epidemic. It  
6  
7  
8 **31** is unclear whether pasta contributes to weight gain or like other low-glycemic index (GI) foods  
9  
10 **32** contributes to weight loss. We synthesized the evidence of the effect of pasta on measures of  
11  
12 **33** adiposity.

13  
14 **34 Design:** Systematic review and meta-analysis using the GRADE approach.

15  
16 **35 Data sources:** MEDLINE, Embase, CINAHL, and the Cochrane Library were searched through  
17  
18  
19 **36** 07 February 2017.

20  
21 **37 Eligibility criteria for selecting studies:** We included randomized controlled trials  $\geq 3$ -weeks  
22  
23 **38** assessing the effect of pasta alone or in the context of low-GI dietary patterns on measures of  
24  
25 **39** global (body weight, BMI, body fat) and regional (waist circumference, waist-to-hip ratio,  
26  
27 **40** sagittal abdominal diameter) adiposity in adults.

28  
29 **41 Data extraction and synthesis:** Two independent reviewers extracted data and assessed risk of  
30  
31 **42** bias. Data were pooled using the generic inverse-variance method and expressed as mean  
32  
33 **43** differences (MDs) with 95% confidence intervals (95% CIs). Heterogeneity was assessed  
34  
35 **44** (Cochran Q statistic) and quantified ( $I^2$ -statistic). GRADE assessed the certainty of the evidence.  
36  
37

38  
39 **45 Results:** We identified no trials of the effect of pasta alone and 32 trial comparisons (n=2,448  
40  
41 **46** participants) of the effect of pasta in the context of low-GI dietary patterns. Pasta in the context  
42  
43 **47** of low-GI dietary patterns significantly reduced body weight (MD=-0.63kg [95% CIs,-0.84,-  
44  
45 **48** 0.42kg]) and BMI (MD=-0.26kg/m<sup>2</sup> [95% CIs,-0.36,-0.16kg/m<sup>2</sup>]) compared with higher-GI  
46  
47 **49** dietary patterns. There was no effect on other measures of adiposity. The certainty of the  
48  
49 **50** evidence was graded as moderate for body weight, BMI, WHR, and SAD and low for WC and  
50  
51 **51** body fat.

1  
2  
3 52 **Conclusions:** Pasta in the context of low-GI dietary patterns does not adversely affect adiposity  
4  
5 53 and even reduces body weight and BMI compared to higher GI dietary patterns. Future trials  
6  
7 54 should assess the effect of pasta in the context of other healthy dietary patterns.  
8  
9

10 55 **Protocol registration:** ClinicalTrials.gov Identifier, NCT02961088  
11  
12 56  
13  
14 57  
15  
16

### 17 58 **Strengths and limitations of this study**

- 19 59 - The present systematic review and meta-analysis was based on a comprehensive search  
20  
21 60 and includes a large number of randomized controlled trials which provide the best  
22  
23 61 protection against bias.  
24  
25  
26 62 - We used the Grading of Recommendations Assessment, Development, and Evaluation  
27  
28 63 (GRADE) approach to evaluate the strength and quality of the evidence.  
29  
30  
31 64 - There was evidence of unexplained inconsistency in the intervention estimates across  
32  
33 65 trials for waist circumference and body fat.  
34  
35 66 - The generalizability of our results is questionable with evidence of indirectness in the  
36  
37 67 pooled estimates for all body and adiposity outcomes, as all of the trials assessed pasta in  
38  
39 68 the context of low-GI dietary patterns (no trials assessed the effect of pasta alone or in the  
40  
41 69 context of other dietary patterns) and most of the available trials did not quantify the  
42  
43  
44 70 amount of pasta consumed.  
45  
46  
47  
48  
49  
50  
51  
52  
53  
54  
55  
56  
57  
58  
59  
60



## 71 INTRODUCTION

72 As the role of saturated fat in chronic disease has been called into question, carbohydrates have  
73 come under attack in the media<sup>1,2</sup>, popular books<sup>3-9</sup>, statements of health advocacy groups<sup>10</sup> and  
74 commentaries in leading medical journals<sup>11,12</sup>. Much of the attention has focused on sugars but  
75 traditional carbohydrate staples like pasta, rice, and breads are increasingly being implicated in  
76 the epidemics of overweight and obesity<sup>1,7</sup>. Although systematic reviews and meta-analyses of  
77 randomized controlled trials of dietary patterns that are high in these foods but low in glycemic  
78 index (GI)<sup>13,14</sup>, high in whole grains<sup>15,16</sup>, and/or high in dietary fibre have shown advantages for  
79 weight related outcomes<sup>17,18</sup>, there has been a general lack of recognition of the importance of  
80 carbohydrate quality.

81 Pasta is an important example of a food which is considered a refined carbohydrate but has a  
82 low-GI, a property that has been exploited extensively in studies of low-GI dietary patterns. It  
83 remains unclear whether pasta alone or in the context of a low-GI dietary pattern shares the  
84 advantages of other low-GI foods or on the contrary contributes to weight gain. We are not  
85 aware of any systematic reviews and meta-analyses which have synthesized the evidence of the  
86 effect of pasta on body weight outcomes. We undertook a systematic review and meta-analysis  
87 of randomized controlled trials (RCTs) using the GRADE approach to quantify the effect of  
88 pasta alone or in the context of low-GI dietary patterns on body weight and measures of  
89 adiposity relevant to the prevention and management of overweight and obesity.

90

## 91 METHODS

### 92 Design

1  
2  
3 93 Our protocol followed the guideline of the Cochrane Handbook for Systematic Reviews of  
4  
5 94 Interventions<sup>19</sup>, and findings are reported according to the guidelines of the Preferred Reporting  
6  
7 95 Items for Systematic Reviews and Meta-Analyses<sup>20</sup> (**Supplemental Table S1**). The protocol is  
8  
9 96 registered at clinicaltrials.gov (identifier, NCT02961088).  
10  
11  
12  
13

### 14 98 **Data sources and searches**

15  
16 99 We searched MEDLINE (<http://www.nlm.nih.gov/bsd/pmresources.html>), Embase  
17  
18  
19 100 (<https://www.embase.com>), CINAHL (<https://health.ebsco.com/products/the-cinahl-database>),  
20  
21 101 and the Cochrane Library (<http://www.cochranelibrary.com/>) from inception through 07  
22  
23 102 February 2017. The full search terms used in this study are presented in **Supplemental Tables**  
24  
25 103 **S2-S3**. Briefly, we searched using variations of the terms pasta and glycemic index and glycemic  
26  
27 104 load and body weight and BMI. The search was limited to human studies and had no language  
28  
29 105 restrictions. Reference lists of selected studies and reviews were also searched to identify  
30  
31 106 additional articles.  
32  
33  
34

### 35 107 36 37 108 **Study selection**

38  
39 109 We include RCTs that investigated the effect of pasta consumed alone or in the context of low-  
40  
41 110 GI dietary patterns that emphasized pasta in comparison with higher GI diets that did not include  
42  
43 111 pasta on body weight or other measures of global (BMI, body fat) or abdominal (waist  
44  
45 112 circumference, waist-to-hip ratio, sagittal abdominal diameter, or visceral adipose tissue assessed  
46  
47 113 by imaging modalities) adiposity in participants of all health backgrounds. Trials were included  
48  
49 114 if the intervention arm assessed the effect of pasta consumed alone or assessed the effect of a low  
50  
51 115 GI diet which emphasized pasta as part of the low GI dietary advice. Trials were excluded if they  
52  
53  
54  
55  
56  
57  
58  
59  
60

1  
2  
3 116 had diet duration of <3 weeks, did not intend to use a calorie- and macronutrient-matched  
4  
5 117 comparator arm that was higher in GI; included pregnant or breast-feeding women or children; or  
6  
7  
8 118 did not provide suitable end-point data. When multiple publications existed for the same study,  
9  
10 119 the article with the most information was included (n=6). Published abstracts were not included.  
11  
12  
13

## 14 121 **Data extraction**

16  
17 122 Two reviewers (LC, CB) assessed the titles and abstracts of all identified studies and  
18  
19 123 independently reviewed and extracted relevant data from each report, including study design,  
20  
21 124 blinding, sample size, participant characteristics, follow-up duration, identification of pasta in the  
22  
23 125 low-GI diet only, comparator diet, macronutrient profile, funding source, and outcome data. The  
24  
25 126 primary outcome was body weight, and secondary outcomes included markers of global (BMI,  
26  
27 127 body fat) and abdominal (waist circumference, waist-to-hip ratio, sagittal abdominal diameter, or  
28  
29 128 visceral adipose tissue assessed by imaging modalities) adiposity. Mean±SD differences between  
30  
31 129 test and control arms were extracted for each outcome.  
32  
33

34  
35 130 In those trials where the data were included in figures and not provided numerically, we used the  
36  
37 131 software program Plot Digitizer version 2.6.8 (<http://plotdigitizer.sourceforge.net/>) to extract the  
38  
39 132 data. This program is a JAVA program that digitizes scanned figures of X and Y plots from GIF,  
40  
41 133 JPEG, or PNG image file formats and allows one to calibrate the X and Y axes for the estimation  
42  
43 134 data points. Additional information was requested from the authors of all included trials.  
44  
45

46  
47 135 Disagreement were resolved by consensus or where necessary by a third author (SBM).  
48  
49

50 136

## 51 137 **Risk of bias assessment**

1  
2  
3 138 Risk of bias for each individual study was assessed using the Cochrane Risk of Bias tool<sup>19</sup>. The  
4  
5 139 level of bias was evaluated for sequence generation, allocation concealment, blinding,  
6  
7  
8 140 incomplete outcome data, and selective reporting and determined overall as either low (proper  
9  
10 141 methods taken to reduce bias), high (improper methods creating bias), or unclear (insufficient  
11  
12 142 information provided to determine the bias level).  
13  
14  
15 143

### 16 17 144 **Statistical analysis**

18  
19 145 Baseline, end-of-study, and between-treatment differences in body weight, BMI, waist  
20  
21 146 circumference, body fat, waist-to-hip ratio, sagittal abdominal diameter or visceral adipose tissue  
22  
23  
24 147 assessed by imaging modalities were recorded as means±SDs. If not provided, between-  
25  
26 148 treatment differences in change-from-baseline or end differences were calculated by subtracting  
27  
28 149 means and variance measures such as SEs were imputed with the use of published formulas<sup>19</sup>.  
29  
30  
31 150 Missing SDs were imputed with the use of the pooled SD from other studies included in the  
32  
33 151 analysis<sup>19</sup>.  
34  
35 152 Data analyses were conducted using Review Manager (RevMan) version 5.3 (Copenhagen,  
36  
37  
38 153 Denmark: The Nordic Cochrane Centre, The Cochrane Collaboration, 2014) for primary  
39  
40 154 analyses and Stata version 13 (College Station, TX: StataCorp LP) for subgroup analyses. A  
41  
42 155 generic inverse-variance method with random-effects models was used to calculate pooled mean  
43  
44  
45 156 differences and 95% confidence intervals (CIs). Random-effects models were used even in the  
46  
47 157 absence of statistically significant inter-study heterogeneity, as they yield more conservative  
48  
49 158 summary effect estimates in the presence of residual heterogeneity. Change-from-baseline  
50  
51 159 differences were preferred over end differences and paired analyses were applied to all crossover  
52  
53  
54  
55  
56  
57  
58  
59  
60

1  
2  
3 160 trials with the use of a within-individual correlation coefficient between treatments of 0.5 as  
4  
5 161 described by Elbourne et al.<sup>21</sup>  
6  
7 162 Inter-study heterogeneity was assessed by the Cochran Q statistic, where  $P < 0.10$  was considered  
8  
9 163 statistically significant, and quantified by the  $I^2$  statistic, where  $I^2 \geq 50\%$  indicates substantial  
10  
11 164 heterogeneity<sup>19</sup>. Sensitivity analysis were performed which included the removal of each single  
12  
13 165 study from the meta-analyses one at a time and recalculation of the summary effect. An  
14  
15 166 influential study was considered a study whose removal changed the magnitude of the pooled  
16  
17 167 effect by  $>10\%$ . Sensitivity analysis were also conducted using different correlation coefficient  
18  
19 168 values for crossover trials (0.25 and 0.75) to test for the robustness of the effect size, conducting  
20  
21 169 analyses using fixed effects models and restricting analyses to those trials for which pasta intake  
22  
23 170 could be quantified.  
24  
25  
26  
27  
28 171 If  $\geq 10$  trial comparisons were available, then sources of heterogeneity were explored by  
29  
30 172 subgroup analyses. A priori categorical subgroups analyses were assessed by meta-regression  
31  
32 173 analyses. These included patient type (normal body weight, overweight or obese [average  
33  
34 174 baseline BMI  $>27\text{kg/m}^2$ ]), diabetes, coronary heart disease), follow-up ( $<24$ -weeks,  $\geq 24$  weeks),  
35  
36 175 baseline BMI (BMI  $\leq 30$ ,  $>30\text{kg/m}^2$ ), design (parallel, crossover), energy balance (negative on  
37  
38 176 both arms [weight loss diets], neutral on both arms [weight maintaining diets]) and dose of pasta  
39  
40 177 (based on the median). A priori categorical subgroup analyses also included the following dietary  
41  
42 178 factors: GI (absolute level [ $\leq 55$ ,  $>55$ ; glucose scale], within-treatment change, between-treatment  
43  
44 179 change), fat intake (absolute level [ $<30\%$ ,  $\geq 30\%$  energy], within-treatment change, between-  
45  
46 180 treatment change), carbohydrate intake (absolute level [ $<50\%$ ,  $\geq 50\%$  energy], within-treatment  
47  
48 181 change, between-treatment change), protein intake (absolute level [ $<20\%$ ,  $\geq 20\%$  energy], within-  
49  
50 182 treatment change, between-treatment change), dietary fibre intake (absolute level [ $<28\text{g/day}$ ,  
51  
52  
53  
54  
55  
56  
57  
58  
59  
60

1  
2  
3 183  $\geq 28$ g/day], within-treatment change, between-treatment change), and risk of bias. A priori  
4  
5 184 continuous meta-regression analyses were conducted on the absolute levels and within- and  
6  
7  
8 185 between-treatment changes of these same dietary factors in the intervention arms of pasta in the  
9  
10 186 context of low-GI dietary patterns. Linear and non-linear pasta intake dose-response analyses  
11  
12 187 were assessed by using continuous meta-regression analyses and spline curve modeling  
13  
14 188 (MKSPLINE procedure), respectively. Publication bias was assessed by visual inspection of  
15  
16 189 funnel plots and the Egger<sup>22</sup> and Begg<sup>23</sup> tests, when  $\geq 10$  trial comparisons were available. If  
17  
18 190 publication bias was suspected, then adjustment for funnel plot asymmetry was done by imputing  
19  
20 191 missing study data using the Duval and Tweedie trim and fill method<sup>24</sup>.  
21  
22  
23  
24  
25

### 26 193 **Grading the evidence**

27  
28 194 The grading of recommendations assessment, development, and evaluation (GRADE) approach  
29  
30 195 was used to assess the certainty of the evidence<sup>25</sup>. Evidence was graded as high, moderate, low  
31  
32 196 or very low quality. The included RCTs were graded as high quality evidence by default and  
33  
34 197 downgraded based on pre-specified criteria. Criteria to downgrade evidence included risk of bias  
35  
36 198 (weight of studies show risk of bias assessed by the Cochrane Risk of Bias tool), inconsistency  
37  
38 199 (substantial unexplained heterogeneity,  $I^2 > 50\%$ ,  $P < 0.10$ ), indirectness (presence of factors that  
39  
40 200 limited the generalizability of the results), imprecision (the 95% CI for effect estimates were  
41  
42 201 wide or crossed pre-specified minimally important differences [MIDs] for harm), and publication  
43  
44 202 bias (significant evidence of small-study effects).  
45  
46  
47  
48  
49  
50  
51

### 52 204 **Patient involvement**

1  
2  
3 205 No patients were directly involved in the development of the research question, selection of the  
4  
5 206 outcome measures, design and implementation of the study, or interpretation of the results.  
6  
7

8 207

## 9 10 208 **RESULTS**

11  
12 209

### 13 14 210 **Search results**

15  
16  
17 211 **Figure 1** shows the flow of the literature. We identified 4876 reports of which 29 met eligibility  
18  
19 212 criteria. No reports were identified that assessed the effect of pasta alone, while 29 reports  
20  
21 213 (including 32 trial comparisons involving 2448 participants) were identified that assessed the  
22  
23 214 effect of pasta in the context of low-GI dietary patterns on any adiposity outcome in adults<sup>26-54</sup>.  
24  
25 215 Of the 32 trial comparisons that assessed the effect of pasta in the context of a low-GI dietary  
26  
27 216 pattern, there were 32 trial comparisons for body weight, 18 trial comparisons for BMI<sup>27,28,31-  
28  
29 33,35,36,39-41,43-46,48,49,52,53</sup>, 18 trial comparisons for waist circumference<sup>27,28,31,33,34,36,38-40,42,44-47,52,53</sup>,  
30  
31 217 10 trial comparisons for body fat<sup>27,28,31-33,36,38,41,43,53</sup>, 6 trial comparisons for waist-to-hip  
32  
33 218 ratio<sup>31,39,40,44,45,52</sup>, and 3 trial comparisons for sagittal abdominal diameter<sup>34,39</sup>. There was only  
34  
35 219 one trial comparison identified<sup>35</sup> for visceral adipose tissue assessed by imaging modalities, thus  
36  
37 220 a meta-analysis could not be undertaken for this outcome.  
38  
39 221  
40  
41  
42 222

### 43 44 223 **Trial characteristics**

45  
46  
47 224 **Table 1** and **Supplemental Table S4** show the characteristics of all included trials of the effect  
48  
49 225 of pasta in the context of low-GI dietary patterns. The majority of trials had a parallel design  
50  
51 226 (26/32) with a median follow-up of 12 weeks (IQR: 9–21 weeks) and a median number of  
52  
53 227 participants per trial of 43 (IQR: 21–112). Most participants were middle aged (median age: 50  
54  
55  
56  
57  
58  
59  
60

1  
2  
3 228 y; IQR: 40-58 y) men and women (median ratio of men to women: 0.4:1 in available trials). The  
4  
5 229 median baseline BMI across studies was 30.4kg/m<sup>2</sup> (IQR: 28.2–32.0). Regarding metabolic  
6  
7 230 phenotype, 21 (66%) trials included participants who were overweight or obese (had a baseline  
8  
9 231 BMI≥27kg/m<sup>2</sup>), 10 (31%) had diabetes and one trial (3%) with coronary heart disease (CHD).  
10  
11 232 We did not retrieve any trials where participants had a normal BMI at baseline (≤25kg/m<sup>2</sup>),  
12  
13 233 although 6 trials did not include BMI >25 kg/m<sup>2</sup> as part of criteria, the average baseline BMI was  
14  
15 234 ≥27 kg/m<sup>2</sup>, therefore categorized as overweight.  
16  
17  
18  
19  
20  
21

235

### 236 **Risk of bias**

237 **Supplemental Figures S1 and S2** show the individual Cochrane Risk of Bias tool assessments  
238 for each of the included trials of the effect of pasta in the context of low-GI dietary patterns. No  
239 serious risk of bias was detected.  
240

241

### 241 **Effect of Pasta in the Context of Low-GI dietary patterns and Body Weight**

242 **Figure 2** shows the effect of pasta in the context of low-GI dietary patterns on the primary  
243 outcome body weight. Pooled analyses showed pasta in the context of low-GI dietary patterns  
244 had the effect of reducing body weight by -0.63 kg (95% CI:-0.84, -0.42 kg; P<0.001) compared  
245 with higher GI control diets with no evidence of heterogeneity (I<sup>2</sup>=0%, P-heterogeneity=0.51).  
246

247

### 247 **Effect of Pasta in the Context of Low-GI dietary patterns on Markers of Global Adiposity**

248 **Figure 3 and Supplemental Figure S3-S4** show the effect of pasta in the context of low-GI  
249 dietary patterns on markers of global adiposity. Pooled analyses showed that pasta in the context  
250 of low-GI dietary patterns had the effect of reducing BMI by -0.26kg/m<sup>2</sup> (n=18 trials; MD=-



1  
2  
3 251 0.26kg/m<sup>2</sup>; 95% CI:-0.36, -0.16 kg/m<sup>2</sup>; P<0.001) compared with higher GI control diets with no  
4  
5 252 evidence of heterogeneity (I<sup>2</sup>=0%, P-heterogeneity=0.90). There was no effect on body fat (n=10  
6  
7 253 trials; MD=-0.01%, 95% CI:-0.58, 0.56%; P=0.98) with evidence of substantial heterogeneity  
8  
9 254 (I<sup>2</sup>=65%, P-heterogeneity<0.01).  
10  
11  
12  
13

## 14 256 **Effect of Pasta in the Context of Low-GI dietary patterns on Markers of Abdominal** 15 16 17 257 **Adiposity**

18  
19 258 **Figure 3 and Supplemental Figures S5-S7** show the pooled estimates for the markers of  
20  
21 259 abdominal adiposity. Pooled analyses did not show a significant effect of pasta in the context of  
22  
23 260 low-GI dietary patterns compared with higher-GI control diets on waist circumference (n=18  
24  
25 261 trials; MD=-0.46cm, 95% CI:-1.05, 0.14cm; P=0.13), waist-to-hip ratio (n=6 trials; MD=-0.00,  
26  
27 262 95% CI:-0.01, 0.00; P=0.27), or sagittal abdominal diameter (n=3 trials, MD=-0.09cm, 95% CI:-  
28  
29 263 0.34, 0.16cm; P=0.48) There was only evidence of substantial heterogeneity in the analyses for  
30  
31 264 waist circumference (I<sup>2</sup>=62%, P-heterogeneity<0.01).  
32  
33  
34  
35  
36  
37

## 38 266 **Sensitivity analyses**

39  
40 267 We conducted four sets of sensitivity analyses (**Supplemental Tables S5-6, Supplemental**  
41  
42 268 **Figures S8-9**). The systematic removal of each trial did not modify the direction or significance  
43  
44 269 of the effect estimates or the evidence of heterogeneity for any of the outcomes with the  
45  
46 270 exception of waist circumference (**Supplemental Table S5**). In the sensitivity analysis for waist  
47  
48 271 circumference, two studies were influential studies in that their removal altered the magnitude of  
49  
50 272 the pooled effect in the remaining studies by >10%, where the removal of the studies of  
51  
52 273 McMillan-Price et al. (high protein comparison)<sup>42</sup> and Jenkins et al.<sup>44</sup> rendered the results for  
53  
54  
55  
56  
57  
58  
59  
60

1  
2  
3 274 waist circumference statistically significant (MD= -0.62cm; 95% CI: -1.19, -0.05; P=0.03) and  
4  
5 275 (MD= -0.61cm; 95% CI: -1.18, -0.04; P=0.04), respectively; forest plots not shown).  
6  
7 276 Heterogeneity remained significant in both cases ( $I^2= 55%$ , P-heterogeneity<0.01 and  $I^2=50%$ , P-  
8  
9 277 heterogeneity=0.01, respectively). Sensitivity analyses using correlation coefficients of 0.25 and  
10  
11 278 0.75 for paired analyses of crossover trials also did not modify the results (**Supplemental Table**  
12  
13 279 **S6**). In the sensitivity analyses where fixed effects models were applied (**Supplemental Figure**  
14  
15 280 **S8**), the direction, magnitude and significance of the pooled estimates were very similar to those  
16  
17 281 produced by the random effects models with the exception of the sensitivity analysis for waist  
18  
19 282 circumference which was significant (MD= -0.62; 95% CI: -0.93, -0.32; P<0.001). Finally,  
20  
21 283 restricting analyses to the 11 trials for which pasta intake could be quantified (median pasta  
22  
23 284 intake, 3.33 servings/week [range, 1.75 – 7 servings/week]) showed a similar reduction in body  
24  
25 285 weight (MD= -0.70 kg; 95% CI:-1.10, -0.29 kg; P<0.001) when pasta was consumed in the  
26  
27 286 context of low-GI dietary patterns compared with the higher GI control arms without evidence of  
28  
29 287 heterogeneity ( $I^2=0%$ , P-heterogeneity=0.68) (**Supplemental Figure S9**).  
30  
31  
32  
33  
34  
35  
36  
37

### 288 289 **Subgroup analyses**

38 290 We were only able to conduct a priori categorical and continuous subgroup analyses for body  
39  
40 291 weight, BMI, body fat and waist circumference. Subgroup analyses for waist-to-hip ratio and  
41  
42 292 sagittal abdominal diameter could not be assessed, owing to <10 trial comparisons in each case.  
43  
44 293 **Supplemental Figures S10-S12** show the categorical a priori subgroup analyses for body  
45  
46 294 weight. There was no evidence of significant effect modification in any of the subgroup analyses  
47  
48 295 for body weight, including no effect modification of follow-up when comparing studies less than  
49  
50 296 24 weeks duration to those greater than or equal to 24 weeks (-0.63kg vs -0.57kg, respectively)  
51  
52  
53  
54  
55  
56  
57  
58  
59  
60

1  
2  
3 297 **(Supplemental Figure S10)**. Neither was there evidence of significant effect modification in any  
4  
5 298 of the subgroup analyses for BMI, body fat or waist circumference **(Supplemental Figures S13-**  
6  
7 299 **20)**.  
8  
9

10 300  
11  
12 301 **Supplemental Table S7** and **Supplemental Figures S21-22** show the continuous subgroup  
13  
14 302 analyses for body weight. There was evidence of significant effect modification by carbohydrate  
15 303 and protein intake, where an increase in carbohydrate intake in the intervention group in which  
16 304 pasta was consumed in the context of low-GI dietary patterns was associated with weight loss  
17 305 ( $\beta = -0.07$ , 95% CI: -0.12, -0.01,  $I^2 = 0.00\%$ ,  $P = 0.02$ ), and an increase in protein intake in the  
18 306 intervention group in which pasta was consumed in the context of low-GI dietary patterns was  
19 307 associated with weight gain ( $\beta = 0.15$ , 95% CI: 0.03, 0.27,  $I^2 = 0.00\%$ ,  $P = 0.02$ ). None of the other  
20 308 continuous subgroup analyses were significant. There was no evidence of significant effect  
21 309 modification in any of the continuous subgroup analyses for BMI **(Supplemental Table S8)**. For  
22 310 body fat, there was evidence of significant effect modification in the continuous meta-regression  
23 311 subgroup analysis of difference in GI between intervention and control groups, where greater  
24 312 difference in GI between the groups was associated with greater reduction in body fat in the  
25 313 intervention group ( $\beta = -0.09$ , 95% CI: -0.15, -0.03,  $I^2 = 19.39\%$ ,  $P = 0.01$ ) **(Supplemental Table**  
26 314 **S9)**. None of the other continuous subgroup analyses were significant. For waist circumference,  
27 315 there was evidence of significant effect modification in the continuous meta-regression subgroup  
28 316 analysis of absolute carbohydrate level and absolute protein level, where greater carbohydrate  
29 317 level in the intervention group in which pasta was consumed in the context of low-GI dietary  
30 318 patterns was associated with greater loss in waist circumference ( $\beta = -0.11$ , 95% CI: -0.19, -0.04,  
31 319  $I^2 = 27.06\%$ ,  $P < 0.01$ ) and a lower protein level in the intervention group in which pasta was  
32  
33  
34  
35  
36  
37  
38  
39  
40  
41  
42  
43  
44  
45  
46  
47  
48  
49  
50  
51  
52  
53  
54  
55  
56  
57  
58  
59  
60

1  
2  
3 320 consumed in the context of low-GI dietary patterns was associated with an increase in waist  
4  
5 321 circumference ( $\beta= 0.20$ , 95% CI: 0.01, 0.38,  $I^2=43.92\%$ ,  $P=0.04$ ) (**Supplemental Table S10**).  
6  
7  
8 322 None of the other continuous subgroup analyses were significant.  
9

10 323

### 11 324 **Dose-response analyses**

12  
13  
14 325 **Supplemental Tables S7 and S11** and **Supplemental Figure S23** show the dose-response  
15  
16 326 analysis for the 11 trials for which pasta intake could be quantified. No evidence of a linear dose  
17  
18 327 response was seen for pasta intake by meta-regression analyses (**Supplemental Table S7**).  
19  
20 328 There was also no evidence of a non-linear dose response by MKSPLINE ( $P=0.85$ )  
21  
22 329 (**Supplemental Figure S23**) or piecewise linear meta-regression analyses (**Supplemental Table**  
23  
24 330 **S11**).  
25  
26 331

### 27 332 **Publication Bias**

28  
29 333 **Supplemental Figures S24-S27** shows the funnel plots for body weight, BMI, body fat and  
30  
31 334 waist circumference. There was no evidence of funnel-plot asymmetry. Formal testing with the  
32  
33 335 Egger and Begg tests did not show evidence of small-study effects ( $P>0.05$  for both). Publication  
34  
35 336 bias was not assessed for waist-to-hip ratio and sagittal abdominal diameter, owing to  $<10$  trial  
36  
37 337 comparisons.  
38  
39 338

### 40 339 **GRADE Assessment**

41  
42 340 **Supplemental Table S12** shows a summary of the GRADE assessments for the effect of pasta in  
43  
44 341 the context of low-GI dietary patterns on body weight and measures of adiposity. The evidence  
45  
46 342 was graded as moderate for body weight, BMI, waist-to-hip ratio and sagittal abdominal  
47  
48  
49  
50  
51  
52  
53  
54  
55  
56  
57  
58  
59  
60

1  
2  
3 343 diameter owing to downgrades for indirectness and low for waist circumference and body fat,  
4  
5 344 owing to downgrades for indirectness and inconsistency ( $I^2=59%$ ,  $P$ -heterogeneity $<0.001$ ;  
6  
7 345  $I^2=66%$ ,  $P$ -heterogeneity $<0.01$ , respectively).  
8  
9

10 346

## 11 347 **DISCUSSION**

12  
13  
14 348 The present systematic review and meta-analysis quantified the effect of pasta alone and pasta in  
15  
16 349 the context of low-GI dietary patterns on body weight and other markers of adiposity. We failed  
17  
18 350 to identify any trial comparisons for the effect of pasta alone but did identify 32 trial comparisons  
19  
20 351 for the effect of pasta in the context of low-GI dietary patterns in 2448 participants who were  
21  
22 352 predominantly middle-aged and overweight or obese. The primary pooled analysis demonstrated  
23  
24 353 that pasta in the context of low-GI dietary patterns did not contribute to weight gain, resulting in  
25  
26 354 a significant weight loss of -0.63kg when compared to diets higher in GI over a median follow-  
27  
28 355 up of 12 weeks. The lack of harm was reflected in the established clinical secondary outcome  
29  
30 356 measures of global (BMI and body fat) and abdominal adiposity (waist circumference, waist-to-  
31  
32 357 hip ratio and sagittal abdominal diameter). These findings were robust across subgroups. The  
33  
34 358 findings did not differ by metabolic phenotype in those who were overweight or obese or had  
35  
36 359 diabetes, which is noteworthy since these are populations who would benefit from weight  
37  
38 360 management strategies. There was also no effect modification by the energy balance of the  
39  
40 361 design such that the weight loss was seen even under conditions of neutral energy balance (in  
41  
42 362 which participants were instructed to consume dietary advice ad libitum), suggesting that  
43  
44 363 encouragement of the consumption of pasta in the context of a low-GI dietary patterns does not  
45  
46 364 cause harm and may even lead to spontaneous weight loss. There was also no effect modification  
47  
48 365 by follow-up either in continuous meta-regression or categorical, where the 24 trials with  
49  
50  
51  
52  
53  
54  
55  
56  
57  
58  
59  
60

1  
2  
3 366 <24weeks follow-up had a weight reduction similar to those 8 trials with  $\geq 24$ weeks follow-up (-  
4  
5 367 0.63kg vs -0.57kg, respectively). This is of relevance since many dietary studies are successful in  
6  
7  
8 368 demonstrating weight loss in the short term but not over the long term.  
9

10 369

### 11 12 370 **Findings in the context of existing studies**

13  
14 371 We are not aware of any RCTs directly assessing the effect of pasta intake on any health  
15  
16 372 parameters including body weight. Our findings, however, agree with earlier systematic reviews  
17  
18 373 and meta-analyses of RCTs of the effect of low-GI dietary patterns irrespective of pasta intake  
19  
20 374 on body weight and adiposity. The systematic review and meta-analysis by Thomas et al. in 2007  
21  
22 375 found a significant -1.1kg weight loss and  $-1.3\text{kg}/\text{m}^2$  reduction in BMI favouring low-GI or  
23  
24 376 glycemic load (GL) diets compared to control diets in 6 RCTs of 5 weeks to 6 months in duration  
25  
26 377 in overweight or obese individuals<sup>13</sup>. Another systematic review and meta-analysis by  
27  
28 378 Schwingshackl et al. in 2013 found a -0.62kg weight loss favouring low-GI/GL diets compared  
29  
30 379 to higher GI/GL diets in 14 RCTs with greater than 6 months duration in overweight individuals  
31  
32 380 ( $\text{BMI} > 25\text{kg}/\text{m}^2$ )<sup>14</sup>.  
33  
34  
35  
36  
37

38 381

39  
40 382 Our findings also agree with trials in which pasta was emphasized in the context of other healthy  
41  
42 383 dietary patterns. One trial done in children in Spain given Mediterranean dietary advice which  
43  
44 384 included increasing the intake of pasta found that approximately 11.3% of the participants in the  
45  
46 385 Mediterranean diet group who were classified as overweight and obese changed their weight  
47  
48 386 status to normal weight compared to only approximately 2.6% of the participants in the control  
49  
50 387 group<sup>55</sup>.  
51  
52  
53

54 388

1  
2  
3 389 Other lines of evidence from observational studies have demonstrated benefits of pasta  
4  
5 390 consumption on body weight and adiposity. Pasta intake was recently assessed in the Moli-sani  
6  
7 391 study and the Italian Nutrition & HEalth Survey (INHES), a cross-sectional study of over  
8  
9 392 20,000 Italians from all over Italy<sup>56</sup>. The study demonstrated that higher pasta consumption was  
10  
11 393 associated with lower BMI, waist circumference and waist-to-hip ratio and with a lower  
12  
13 394 prevalence of overweight and obesity<sup>56</sup>. Furthermore, greater pasta intake was associated with  
14  
15 395 better adherence to the Mediterranean diet, a dietary pattern which has a demonstrated  
16  
17 396 cardiovascular benefit<sup>57</sup>. Similar associations between greater pasta intake and lower body  
18  
19 397 weight have also been observed in prospective U.S. cohorts<sup>58</sup>. A pooled analysis of the 3  
20  
21 398 Harvard cohorts also showed that higher GI diets (which would preclude pasta) were associated  
22  
23 399 with weight gain<sup>59</sup>.

24  
25  
26  
27  
28 400  
29  
30  
31 401 Although the product form of pasta can vary widely, including in shape (e.g. macaroni, spaghetti,  
32  
33 402 linguine), ingredients (e.g. type of wheat, egg content), and processing technique (e.g. drying  
34  
35 403 temperature), studies have demonstrated that when comparing pastas varying in these  
36  
37 404 parameters, despite slight variations in glycemic response among pastas, glycemic responses are  
38  
39 405 still lower compared to a control, e.g. white bread<sup>60,61</sup>. One concern of the choice of pasta as a  
40  
41 406 carbohydrate food is that it is a refined food low in fibre. Although there are whole grain pasta  
42  
43 407 options available, studies have demonstrated that fiber added to pasta, does not significantly  
44  
45 408 affect the glucose or insulin response, the secretion of gut hormones or satiety<sup>62,63</sup>. Furthermore,  
46  
47 409 pasta has a similar glycemic response compared to many fiber-rich carbohydrates, including  
48  
49 410 barley, legumes and steel cut oats, and still a lower glycemic response compared to other fiber-  
50  
51 411 rich foods including whole wheat bread, breakfast cereals like bran flakes and potatoes with  
52  
53  
54  
55  
56  
57  
58  
59

1  
2  
3 412 skin<sup>64</sup>. The typically consumed white wheat pasta also has a higher micronutrient content  
4  
5 413 compared to other white wheat products like bread since it contains the aleurone layer which is  
6  
7 414 preserved as a result of the use of harder wheats (durum wheat); even when durum wheats are  
8  
9 415 used in breads, pasta retains a lower glycemic response primarily because of the processing  
10  
11 416 techniques used in pasta making which give pasta a compact structure and reduced starch  
12  
13  
14 417 hydrolysis<sup>61</sup>.

16  
17 418  
18  
19 419 The mechanism by which pasta in the context of low-GI dietary patterns lead to weight loss even  
20  
21 420 under conditions of ad libitum dietary advice is unclear. Lower GI diets may result in greater  
22  
23 421 body weight reduction compared to higher GI diets because lower GI foods may be more  
24  
25 422 satiating<sup>65</sup> and have been shown to delay hunger and decrease subsequent energy intake<sup>13</sup>. Low-  
26  
27 423 GI dietary patterns are also characterized by high fiber content<sup>64,66</sup> which may also contribute to  
28  
29 424 improvements in satiety and hunger<sup>17</sup>. Furthermore, studies which have compared ad libitum  
30  
31 425 low-GI dietary patterns to standard energy-restricted low-fat diets, demonstrated equivalency or  
32  
33 426 better weight loss when following the low-GI diet, despite the fact that they could eat as much as  
34  
35 427 they desired<sup>13,67</sup>. Thus, voluntary energy intake may be lower after low-GI meals, as has been  
36  
37 428 previously demonstrated<sup>68</sup>.

38  
39  
40  
41  
42 429

### 43 430 **Strengths and limitations**

44  
45 431 The strengths of the present systematic review and meta-analysis include that it is  
46  
47 432 comprehensive, includes RCTs which protects against bias and uses the GRADE approach to  
48  
49 433 evaluate the quality of evidence. Additionally, a large number of trials were identified (32 trials)  
50  
51 434 for the primary outcome of body weight, the median follow-up period was 12 weeks which  
52  
53  
54  
55  
56  
57  
58  
59  
60



1  
2  
3 435 allows for the assessment of a moderate duration of intervention, none of the trials were rated as  
4  
5 436 having a serious risk of bias, and there was no evidence of publication bias.  
6  
7

8 437  
9  
10 438 There are several limitations. First, we downgraded the certainty of the evidence for serious  
11  
12 439 inconsistency in the treatment estimates across trials for some of the outcomes assessed. There  
13  
14 440 was evidence of unexplained heterogeneity in waist circumference ( $I^2=62\%$ ) and in body fat  
15  
16 441 ( $I^2=65\%$ ). Although the inconsistency in these outcomes may have related to measurement  
17  
18 442 error<sup>69</sup> in the different techniques for measuring waist circumference and body fat, we were  
19  
20 443 unable to conduct sensitivity or subgroup analyses to explore this source of heterogeneity.  
21  
22 444 Second, we downgraded the certainty of the evidence for serious indirectness. Most of the  
23  
24 445 available trials did not quantify the amount of pasta consumed in the context of the low-GI  
25  
26 446 dietary patterns. Although sensitivity analyses in which analyses were restricted to the 11 trials  
27  
28 447 that did quantify (providing a median 3.33 servings/week) pasta intake did not meaningfully alter  
29  
30 448 our estimates (-0.70kg versus -0.63kg), it is difficult to quantify the effect of pasta in these diets.  
31  
32 449 There is also the question of indirectness in the translation to other background diets. None of the  
33  
34 450 available trials evaluated the effect of pasta alone or in the context of other dietary patterns.  
35  
36 451 Whether the observed effect of pasta in the context of low-GI dietary patterns will hold in the  
37  
38 452 context of other healthy dietary patterns, such as Mediterranean and Vegetarian dietary patterns,  
39  
40 453 is unclear. Although there is no biological reason to doubt that the findings would hold across  
41  
42 454 different dietary patterns, there was no direct evidence to support this conclusion. If the question  
43  
44 455 had been asked from the perspective of benefit as opposed to that of harm, then the relatively  
45  
46 456 short duration of the included trials is another reason to downgrade for serious indirectness. In  
47  
48 457 the absence of long-term trials (>1 year diet duration), it is difficult to conclude with certainty  
49  
50  
51  
52  
53  
54  
55  
56  
57  
58  
59  
60

1  
2  
3 458 that the observed lack of harm implies an actual sustainable benefit. Finally, there was some  
4  
5 459 evidence of imprecision for benefit. Whereas the 95% CI of the pooled estimates did not overlap  
6  
7 460 with our pre-specified MID for harm (that is, they did not contain evidence for harm) and so  
8  
9 461 were not downgraded for imprecision, the upper bound of the 95% CI did overlap with the lower  
10  
11 462 bound of the same MID to assess the precision of the evidence for benefit for some outcomes.  
12  
13  
14  
15 463

16  
17 464 Balancing these strengths and limitations, the GRADE approach assessed the overall quality and  
18  
19 465 strength of the available evidence of the effect of pasta in the context of low-GI dietary patterns  
20  
21 466 as moderate for the primary outcome of body weight and the secondary outcomes of BMI, waist-  
22  
23 467 to-hip ratio and sagittal abdominal diameter owing to downgrades for indirectness. The evidence  
24  
25 468 was assessed as low for the other secondary outcomes of body fat and waist circumference  
26  
27 469 owing to downgrades for indirectness and inconsistency.  
28  
29  
30  
31 470

### 32 33 471 **Implications**

34  
35 472 These results are important considering the negative messages directed at the public regarding  
36  
37 473 carbohydrates, which is influencing their food choices, as is evident in recent reductions in  
38  
39 474 carbohydrate intake<sup>70-72</sup>, and in particular reductions in pasta consumption<sup>70,73-76</sup>. Contrary to  
40  
41 475 these concerns, the available evidence shows that when pasta is consumed in the context of low-  
42  
43 476 GI dietary patterns that there is not weight gain but rather marginally clinically significant weight  
44  
45 477 loss (>0.5kg)<sup>77</sup>.  
46  
47  
48  
49 478

50  
51 479 Although we were able to approximate the amount of pasta consumed in one third of included  
52  
53 480 trials, it is unclear what the effect of pasta would be in the context of other dietary patterns. Low-  
54  
55  
56  
57  
58  
59  
60

1  
2  
3 481 GI dietary patterns, however, shares many similarities with a Mediterranean diet, which  
4  
5 482 emphasizes many low-GI foods and has demonstrated a CVD benefit<sup>57</sup>.

6  
7 483  
8  
9  
10 484 Current clinical practice guidelines already suggest the replacement of high GI foods with low-  
11  
12 485 GI foods for improvement of glycemic control and cardiovascular risk factors<sup>78,79</sup>. The present  
13  
14 486 evidence means that pasta may be highlighted as an important example of a low-GI food which  
15  
16 487 can contribute to a low-GI dietary pattern, a pattern which in turn may potentially improve  
17  
18  
19 488 cardio-metabolic risk without an adverse effect on weight control.  
20

21  
22 489

## 23 24 490 **CONCLUSIONS**

25  
26 491 In conclusion, the available evidence from RCTs does not allow us to conclude that pasta  
27  
28 492 consumed in the context of low-GI dietary patterns has an adverse effect on body weight and  
29  
30 493 adiposity outcomes of importance in the prevention and management of overweight and obesity.

31  
32  
33 494 On the contrary, pasta in the context of low-GI dietary patterns reduces body weight and BMI  
34  
35 495 compared with higher-GI dietary patterns. The results are generalizable in the context of a high  
36  
37 496 carbohydrate dietary pattern composed of low-GI foods with or without the intention of weight  
38  
39 497 loss in middle-aged individuals who are overweight or obese or have diabetes. Although the  
40  
41 498 clinical significance of the observed weight loss is debatable, this finding increases our  
42  
43 499 confidence that pasta in the context of low-GI dietary patterns does not result in weight gain.

44  
45 500 Further research may change our confidence in the estimates for our primary outcome body  
46  
47 501 weight and several key secondary outcomes including BMI and two measures of abdominal  
48  
49 502 adiposity, waist-to-hip ratio and sagittal abdominal diameter. More research is needed, to  
50  
51 503 improve our estimates for the secondary outcomes, body fat and waist circumference and assess  
52  
53  
54  
55  
56  
57  
58  
59  
60

1  
2  
3 504 whether our findings extend to related cardio-metabolic outcomes. There is also a need for more  
4  
5 505 randomized trials of >1 year diet duration to clarify whether the lack of harm for pasta in the  
6  
7 506 context of low-GI dietary patterns will translate into meaningful long-term benefits. Other  
8  
9  
10 507 randomized trials should focus on whether pasta will have similar effects in the context of other  
11  
12 508 healthy dietary patterns such as a Mediterranean diet.  
13  
14  
15  
16 509

### 17 510 **Acknowledgements**

19  
20 511 We wish to thank Teruko Kishibe, an information specialist in the Scotiabank Health Sciences  
21  
22 512 Library, St Michael's Hospital, for her help in the development of search terms used. Aspects of  
23  
24 513 this work were presented at the Società Italiana di Nutrizione Umana (SINU) Congress, in  
25  
26 514 Parma, Italy, on April 12, 2017 and at the 35th International Symposium on Diabetes and  
27  
28 515 Nutrition, of the Diabetes and Nutrition Study Group (DNSG) of the European Association for  
29  
30 516 the Study of Diabetes (EASD) in Skagen, Denmark, on June 20 and 21, 2017.  
31  
32  
33

### 34 517 **Data Sharing**

35  
36  
37 518 No additional data available.  
38  
39  
40 519

### 41 42 520 **Exclusive License**

43  
44  
45  
46 521 The Corresponding Author has the right to grant on behalf of all authors and does grant on behalf  
47  
48 522 of all authors, an exclusive license (or non-exclusive for government employees) on a worldwide  
49  
50 523 basis to the BMJ Publishing Group Ltd to permit this article (if accepted) to be published in BMJ  
51  
52 524 editions and any other BMJ PGL products and sublicenses such use and exploit all subsidiary  
53  
54 525 rights, as set out in our license.  
55  
56  
57  
58  
59  
60

1  
2  
3 526 **Ethics Approval**  
4  
5

6 527 Not required.  
7  
8

9 528 **Authorship:**  
10

11 529 All authors had full access to all of the data (including statistical reports and tables) in this study  
12  
13 530 and take full responsibility for the integrity of the data and the accuracy of the data analysis.  
14  
15

16  
17 531 **Conception and design:** C.W.C. Kendall, J.L. Sievenpiper.  
18  
19

20 532 **Analysis and interpretation of the data:** L. Chiavaroli, C.W.C. Kendall, C.R. Braunstein, S.  
21

22 533 Blanco Mejia, L.A. Leiter, D.J.A. Jenkins, J.L. Sievenpiper.  
23  
24

25 534 **Drafting of the article:** L. Chiavaroli, J.L. Sievenpiper.  
26  
27

28 535 **Critical revision of the article for important intellectual content:** L. Chiavaroli, C.W.C.  
29

30 Kendall, C.R. Braunstein, S. Blanco Mejia, L.A. Leiter, D.J.A. Jenkins, J.L. Sievenpiper.  
31  
32

33 537 **Final approval of the article:** L. Chiavaroli, C.W.C. Kendall, C.R. Braunstein, S. Blanco Mejia,  
34

35 L.A. Leiter, D.J.A. Jenkins, J.L. Sievenpiper.  
36  
37

38 539 **Obtaining of funding:** C.W.C. Kendall, D.J.A. Jenkins, J.L. Sievenpiper.  
39  
40

41 540 **Administrative, technical, or logistic support:** S. Blanco Mejia.  
42  
43

44 541 **Collection and assembly of data:** L. Chiavaroli, C.R. Braunstein, S. Blanco Mejia.  
45  
46

47 542 **Guarantor:** J.L. Sievenpiper.  
48  
49

50 543 **Transparency declaration:** As guarantor, J.L. Sievenpiper affirms that the manuscript is an  
51

52 544 honest, accurate, and transparent account of the study being reported; that no important aspects  
53  
54  
55  
56  
57  
58  
59  
60

1  
2  
3 545 of the study have been omitted; and that any discrepancies from the study as planned (and, if  
4  
5 546 relevant, registered) have been explained.  
6  
7

8  
9 547 **Funding:**

10 548 This work was funded by the Canadian Institutes of Health Research (funding reference  
11  
12 number, 129920) through the Canada-wide Human Nutrition Trialists' Network (NTN). The  
13 549 Diet, Digestive tract, and Disease (3-D) Centre, funded through the Canada Foundation for  
14  
15 550 Innovation (CFI) and the Ministry of Research and Innovation's Ontario Research Fund (ORF),  
16  
17 551 provided the infrastructure for the conduct of this project. **L Chiavaroli** was funded by a Toronto  
18  
19 552 3D Postdoctoral Fellowship Award. **DJA Jenkins** was funded by the Government of Canada  
20  
21 553 through the Canada Research Chair Endowment. **JL Sievenpiper** was funded by a PSI Graham  
22  
23 554 Farquharson Knowledge Translation Fellowship, Canadian Diabetes Association (CDA)  
24  
25 555 Clinician Scientist award, CIHR INMD/CNS New Investigator Partnership Prize, and Banting &  
26  
27 556 Best Diabetes Centre Sun Life Financial New Investigator Award. None of the sponsors had a  
28  
29 557 role in any aspect of the present study, including design and conduct of the study; collection,  
30  
31 558 management, analysis, and interpretation of the data; and preparation, review, approval of the  
32  
33 559 manuscript or decision to publish.  
34  
35 560  
36  
37  
38  
39  
40  
41  
42

43 562 **Conflicts of Interest:**

44  
45 563 All authors have completed the Unified Competing Interest form (available on request from the  
46  
47 564 corresponding author) and declare: **CWC Kendall** has received research support from the  
48  
49 565 Advanced Foods and Material Network, Agrifoods and Agriculture Canada, the Almond Board  
50  
51 566 of California, the American Pistachio Growers, Barilla, the California Strawberry Commission,  
52  
53 567 the Calorie Control Council, CIHR, the Canola Council of Canada, the Coca-Cola Company  
54  
55 568 (investigator initiated, unrestricted grant), Hain Celestial, the International Tree Nut Council  
56  
57 569 Nutrition Research and Education Foundation, Kellogg, Kraft, Loblaw Companies Ltd., Orafiti,  
58  
59 570 Pulse Canada, Saskatchewan Pulse Growers, Solae and Unilever. He has received travel funding,  
60  
571 consultant fees and/or honoraria from Abbott Laboratories, the Almond Board of California, the  
572  
573 American Peanut Council, the American Pistachio Growers, Barilla, Bayer, the Canola Council

1  
2  
3 573 of Canada, the Coca-Cola Company, Danone, General Mills, the International Tree Nut Council  
4 574 Nutrition Research and Education Foundation, Kellogg, Loblaw Companies Ltd., the Nutrition  
5 575 Foundation of Italy, Oldways Preservation Trust, Orafti, Paramount Farms, the Peanut Institute,  
6 576 PepsiCo, Pulse Canada, Sabra Dipping Co., Saskatchewan Pulse Growers, Solae, Sun-Maid, Tate  
7 577 and Lyle, and Unilever. He is on the Clinical Practice Guidelines Expert Committee for Nutrition  
8 578 Therapy of the European Association for the Study of Diabetes (EASD) and has served on the  
9 579 scientific advisory board for the Almond Board of California, the International Tree Nut Council,  
10 580 Oldways Preservation Trust, Paramount Farms and Pulse Canada. **DJAJ** has received research  
11 581 grants from Saskatchewan Pulse Growers, the Agricultural Bioproducts Innovation Program  
12 582 through the Pulse Research Network, the Advanced Foods and Material Network, Loblaw  
13 583 Companies Ltd., Unilever, Barilla, the Almond Board of California, Agriculture and Agri-food  
14 584 Canada, Pulse Canada, Kellogg's Company, Canada, Quaker Oats, Canada, Procter & Gamble  
15 585 Technical Centre Ltd., Bayer Consumer Care, Springfield, NJ, Pepsi/Quaker, International Nut  
16 586 & Dried Fruit (INC), Soy Foods Association of North America, the Coca-Cola Company  
17 587 (investigator initiated, unrestricted grant), Solae, Haine Celestial, the Sanitarium Company,  
18 588 Orafti, the International Tree Nut Council Nutrition Research and Education Foundation, the  
19 589 Peanut Institute, the Canola and Flax Councils of Canada, the Calorie Control Council (CCC),  
20 590 the CIHR, the Canada Foundation for Innovation and the Ontario Research Fund. He has  
21 591 received in-kind supplies for trial as a research support from the Almond board of California,  
22 592 Walnut Council of California, American Peanut Council, Barilla, Unilever, Unico, Primo,  
23 593 Loblaw Companies, Quaker (Pepsico), Pristine Gourmet, Bunge Limited, Kellogg Canada,  
24 594 WhiteWave Foods. He has been on the speaker's panel, served on the scientific advisory board  
25 595 and/or received travel support and/or honoraria from the Almond Board of California, Canadian  
26 596 Agriculture Policy Institute, Loblaw Companies Ltd, the Griffin Hospital (for the development of  
27 597 the NuVal scoring system, the Coca-Cola Company, EPICURE, Danone, Diet Quality Photo  
28 598 Navigation (DQPN), FareWell, Verywell, True Health Initiative, Saskatchewan Pulse Growers,  
29 599 Sanitarium Company, Orafti, the Almond Board of California, the American Peanut Council, the  
30 600 International Tree Nut Council Nutrition Research and Education Foundation, the Peanut  
31 601 Institute, Herbalife International, Pacific Health Laboratories, Nutritional Fundamental for  
32 602 Health, Barilla, Metagenics, Bayer Consumer Care, Unilever Canada and Netherlands, Solae,  
33 603 Kellogg, Quaker Oats, Procter & Gamble, the Coca-Cola Company, the Griffin Hospital, Abbott  
34 604 Laboratories, the Canola Council of Canada, Dean Foods, the California Strawberry  
35 605 Commission, Haine Celestial, PepsiCo, the Alpro Foundation, Pioneer Hi-Bred International,  
36 606 DuPont Nutrition and Health, Spherix Consulting and WhiteWave Foods, the Advanced Foods  
37 607 and Material Network, the Canola and Flax Councils of Canada, the Nutritional Fundamentals  
38 608 for Health, Agri-Culture and Agri-Food Canada, the Canadian Agri-Food Policy Institute, Pulse  
39 609 Canada, the Saskatchewan Pulse Growers, the Soy Foods Association of North America, the  
40 610 Nutrition Foundation of Italy (NFI), Nutra-Source Diagnostics, the McDougall Program, the  
41 611 Toronto Knowledge Translation Group (St. Michael's Hospital), the Canadian College of  
42 612 Naturopathic Medicine, The Hospital for Sick Children, the Canadian Nutrition Society (CNS),  
43 613 the American Society of Nutrition (ASN), Arizona State University, Paolo Sorbini Foundation  
44 614 and the Institute of Nutrition, Metabolism and Diabetes. He received an honorarium from the  
45 615 United States Department of Agriculture to present the 2013 W.O. Atwater Memorial Lecture.  
46 616 He received the 2013 Award for Excellence in Research from the International Nut and Dried  
47 617 Fruit Council. He received funding and travel support from the Canadian Society of  
48 618 Endocrinology and Metabolism to produce mini cases for the Canadian Diabetes Association

1  
2  
3 619 (CDA). He is a member of the International Carbohydrate Quality Consortium (ICQC). His wife,  
4 620 ALJ, is a director and partner of Glycemic Index Laboratories, Inc., and his sister received  
5 621 funding through a grant from the St. Michael's Hospital Foundation to develop a cookbook for  
6 622 one of his studies. **JL Sievenpiper** has received research support from the Canadian Institutes of  
7 623 health Research (CIHR), Canadian Diabetes Association (CDA), PSI Foundation, Banting and  
8 624 Best Diabetes Centre (BBDC), Canadian Nutrition Society (CNS), American Society for  
9 625 Nutrition (ASN), Calorie Control Council, INC International Nut and Dried Fruit Council  
10 626 Foundation, National Dried Fruit Trade Association, The Coca-Cola Company (investigator  
11 627 initiated, unrestricted), Dr. Pepper Snapple Group (investigator initiated, unrestricted), The Tate  
12 628 and Lyle Nutritional Research Fund at the University of Toronto, and The Alberta Pulse Growers  
13 629 Glycemic Control and Cardiovascular Disease in Type 2 Diabetes Fund at the University of  
14 630 Toronto. He has received in-kind research support from the Almond board of California, Walnut  
15 631 Council of California, American Peanut Council, Barilla, Unilever, Unico, Primo, Loblaw  
16 632 Companies, Quaker (Pepsico), Pristine Gourmet, Bunge Limited, Kellogg Canada, WhiteWave  
17 633 Foods. He has received reimbursement of travel expenses, speaker fees, and/or honoraria from  
18 634 the Canadian Diabetes Association (CDA), Canadian Nutrition Society (CNS), University of  
19 635 Alabama at Birmingham, Oldways Preservation Trust, Nutrition Foundation of Italy (NFI),  
20 636 Diabetes and Nutrition Study Group (DNSG) of the European Association for the Study of  
21 637 Diabetes (EASD), International Life Sciences Institute (ILSI) North America, Dr. Pepper  
22 638 Snapple Group, Corn Refiners Association, World Sugar Research Organization, Dairy Farmers  
23 639 of Canada, Società Italiana di Nutrizione Umana (SINU), III World Congress of Public Health  
24 640 Nutrition, C3 Collaborating for Health, Sprim Brasil, WhiteWave Foods, Rippe Lifestyle,  
25 641 mdBriefcase, Federation of European Nutrition Societies (FENS), New York Academy of  
26 642 Sciences, International Diabetes Federation, American Heart Association (AHA), American  
27 643 Society for Nutrition (ASN), FoodMinds LLC, Memac Ogilvy & Mather LLC, Pulse Canada,  
28 644 Pepsico, BCFN Foundation, The Ginger Network LLC, and Dietitians of Canada. He has ad hoc  
29 645 consulting arrangements with Winston & Strawn LLP, Perkins Coie LLP, and Tate & Lyle. He is  
30 646 a member of the European Fruit Juice Association Scientific Expert Panel. He is on Clinical  
31 647 Practice Guidelines Expert Committees of the Canadian Diabetes Association (CDA) European  
32 648 Association for the study of Diabetes (EASD), and Canadian Cardiovascular Society (CCS), as  
33 649 well as an expert writing panel of the American Society for Nutrition (ASN). He serves as an  
34 650 unpaid scientific advisor for the Food, Nutrition, and Safety Program (FNSP) and the Technical  
35 651 Committee on Carbohydrates of the International Life Science Institute (ILSI) North America.  
36 652 He is a member of the International Carbohydrate Quality Consortium (ICQC), Executive Board  
37 653 Member of the Diabetes and Nutrition Study Group (DNSG) of the EASD, and Director of the  
38 654 Toronto 3D Knowledge Synthesis and Clinical Trials foundation. His wife is an employee of  
39 655 Unilever Canada. No competing interests were declared by **CR Braunstein, S Blanco Mejia,**  
40 656 **and LA Leiter.**

41  
42  
43  
44  
45  
46  
47  
48 657  
49  
50  
51  
52  
53  
54  
55  
56  
57  
58  
59  
60



658 **References**

- 659 1. Malhotra A. Eating MORE fat while cutting carbs and quitting sugar can help you lose weight and  
660 be happier, says top cardiologist. Mail Online 2016.
- 661 2. Taubes G. Diet Advice That Ignores Hunger. The New York Times. Sunday Review ed 2015.
- 662 3. Ludwig D. Always hungry? Conquer cravings, retrain your fat cells and lose weight permanently.  
663 New York: Grand Central Life & Style; 2016.
- 664 4. Taubes G. Why We Get Fat And What To Do About It. . New York: Alfred A Knopf; 2011.
- 665 5. Atkins R. Dr Atkins' Diet Revolution: The High Calorie Way to Stay Thin Forever. : Bantam Books;  
666 1973.
- 667 6. Perlmutter D. Grain Brain: The surprising truth about wheat, carbs, and sugar -- Your brain's  
668 silent killers: Little, Brown And Company; 2013.
- 669 7. David W. Wheat Belly: HarperCollins; 2012.
- 670 8. Cordain L. The Paleo Diet Revised: Lose weight and get healthy by eating the foods you were  
671 designed to eat: Houghton Mifflin Harcourt; 2010.
- 672 9. Teicholz N. The Big Fat Surprise: Why Butter, Meat and Cheese Belong in a Healthy Diet: Simon  
673 and Schuster; 2014.
- 674 10. National Obesity Forum, The Public Health Collaboration. Eat Fat, Cut The Carbs and Avoid  
675 Snacking To Reverse Obesity and Type 2 Diabetes.
- 676 11. Malhotra A. Saturated fat is not the major issue. BMJ 2013;347:f6340.
- 677 12. Malhotra A. Author's reply to Lichtenstein, Tedstone and Pyne, Mann and colleagues, Lim, and  
678 Clifton. BMJ 2013;347:f6855.
- 679 13. Thomas DE, Elliott EJ, Baur L. Low glycaemic index or low glycaemic load diets for overweight  
680 and obesity. Cochrane Database Syst Rev 2007:CD005105.
- 681 14. Schwingshackl L, Hoffmann G. Long-term effects of low glycemic index/load vs. high glycemic  
682 index/load diets on parameters of obesity and obesity-associated risks: a systematic review and meta-  
683 analysis. Nutr Metab Cardiovasc Dis 2013;23:699-706.
- 684 15. Pol K, Christensen R, Bartels EM, Raben A, Tetens I, Kristensen M. Whole grain and body weight  
685 changes in apparently healthy adults: a systematic review and meta-analysis of randomized controlled  
686 studies. Am J Clin Nutr 2013;98:872-84.
- 687 16. Harland JI, Garton LE. Whole-grain intake as a marker of healthy body weight and adiposity.  
688 Public Health Nutr 2008;11:554-63.
- 689 17. Slavin JL. Dietary fiber and body weight. Nutrition 2005;21:411-8.
- 690 18. Dahl WJ, Stewart ML. Position of the Academy of Nutrition and Dietetics: Health Implications of  
691 Dietary Fiber. J Acad Nutr Diet 2015;115:1861-70.
- 692 19. Higgins JP, Green S, eds. Cochrane Handbook for Systematic Reviews of Interventions [Internet].  
693 Version 5.1.0. The Cochrane Collaboration. Version current March 2011 [cited 2015 Sep 23]. Available  
694 from: [www.cochrane-handbook.org](http://www.cochrane-handbook.org).
- 695 20. Moher D, Liberati A, Tetzlaff J, Altman DG, Group P. Preferred reporting items for systematic  
696 reviews and meta-analyses: the PRISMA statement. Ann Intern Med 2009;151:264-9, W64.
- 697 21. Elbourne DR, Altman DG, Higgins JP, Curtin F, Worthington HV, Vail A. Meta-analyses involving  
698 cross-over trials: methodological issues. Int J Epidemiol 2002;31:140-9.
- 699 22. Egger M, Davey Smith G, Schneider M, Minder C. Bias in meta-analysis detected by a simple,  
700 graphical test. BMJ 1997;315:629-34.
- 701 23. Begg CB. A measure to aid in the interpretation of published clinical trials. Stat Med 1985;4:1-9.
- 702 24. Duval S, Tweedie R. Trim and fill: A simple funnel-plot-based method of testing and adjusting for  
703 publication bias in meta-analysis. Biometrics 2000;56:455-63.

- 1  
2  
3 704 25. Guyatt G, Oxman AD, Akl EA, et al. GRADE guidelines: 1. Introduction-GRADE evidence profiles  
4 705 and summary of findings tables. *J Clin Epidemiol* 2011;64:383-94.
- 5 706 26. Jebb SA, Lovegrove JA, Griffin BA, et al. Effect of changing the amount and type of fat and  
6 707 carbohydrate on insulin sensitivity and cardiovascular risk: the RISCK (Reading, Imperial, Surrey,  
7 708 Cambridge, and Kings) trial. *Am J Clin Nutr* 2010;92:748-58.
- 8 709 27. Philippou E, Bovill-Taylor C, Rajkumar C, et al. Preliminary report: the effect of a 6-month dietary  
9 710 glycemic index manipulation in addition to healthy eating advice and weight loss on arterial compliance  
10 711 and 24-hour ambulatory blood pressure in men: a pilot study. *Metabolism* 2009;58:1703-8.
- 11 712 28. Philippou E, McGowan BM, Brynes AE, Dornhorst A, Leeds AR, Frost GS. The effect of a 12-week  
12 713 low glycaemic index diet on heart disease risk factors and 24 h glycaemic response in healthy middle-  
13 714 aged volunteers at risk of heart disease: a pilot study. *Eur J Clin Nutr* 2008;62:145-9.
- 14 715 29. Sichieri R, Moura AS, Genelhu V, Hu F, Willett WC. An 18-mo randomized trial of a low-glycemic-  
15 716 index diet and weight change in Brazilian women. *Am J Clin Nutr* 2007;86:707-13.
- 16 717 30. Wolever TM, Mehling C. High-carbohydrate-low-glycaemic index dietary advice improves  
17 718 glucose disposition index in subjects with impaired glucose tolerance. *Br J Nutr* 2002;87:477-87.
- 18 719 31. Pereira EV, Costa Jde A, Alfenas Rde C. Effect of glycemic index on obesity control. *Arch*  
19 720 *Endocrinol Metab* 2015;59:245-51.
- 20 721 32. Karl JP, Roberts SB, Schaefer EJ, et al. Effects of carbohydrate quantity and glycemic index on  
21 722 resting metabolic rate and body composition during weight loss. *Obesity (Silver Spring)* 2015;23:2190-8.
- 22 723 33. Buscemi S, Cosentino L, Rosafio G, et al. Effects of hypocaloric diets with different glycemic  
23 724 indexes on endothelial function and glycemic variability in overweight and in obese adult patients at  
24 725 increased cardiovascular risk. *Clin Nutr* 2013;32:346-52.
- 25 726 34. Larsen TM, Dalskov SM, van Baak M, et al. Diets with high or low protein content and glycemic  
26 727 index for weight-loss maintenance. *N Engl J Med* 2010;363:2102-13.
- 27 728 35. Solomon TP, Haus JM, Kelly KR, et al. A low-glycemic index diet combined with exercise reduces  
28 729 insulin resistance, postprandial hyperinsulinemia, and glucose-dependent insulinotropic polypeptide  
29 730 responses in obese, prediabetic humans. *Am J Clin Nutr* 2010;92:1359-68.
- 30 731 36. Philippou E, Neary NM, Chaudhri O, et al. The effect of dietary glycemic index on weight  
31 732 maintenance in overweight subjects: a pilot study. *Obesity (Silver Spring)* 2009;17:396-401.
- 32 733 37. Abete I, Parra D, Martinez JA. Energy-restricted diets based on a distinct food selection affecting  
33 734 the glycemic index induce different weight loss and oxidative response. *Clin Nutr* 2008;27:545-51.
- 34 735 38. Aston LM, Stokes CS, Jebb SA. No effect of a diet with a reduced glycaemic index on satiety,  
35 736 energy intake and body weight in overweight and obese women. *Int J Obes (Lond)* 2008;32:160-5.
- 36 737 39. Jensen L, Sloth B, Krog-Mikkelsen I, et al. A low-glycemic-index diet reduces plasma plasminogen  
37 738 activator inhibitor-1 activity, but not tissue inhibitor of proteinases-1 or plasminogen activator inhibitor-  
38 739 1 protein, in overweight women. *Am J Clin Nutr* 2008;87:97-105.
- 39 740 40. Bellisle F, Dalix AM, De Assis MA, et al. Motivational effects of 12-week moderately restrictive  
40 741 diets with or without special attention to the Glycaemic Index of foods. *Br J Nutr* 2007;97:790-8.
- 41 742 41. de Rougemont A, Normand S, Nazare JA, et al. Beneficial effects of a 5-week low-glycaemic  
42 743 index regimen on weight control and cardiovascular risk factors in overweight non-diabetic subjects. *Br J*  
43 744 *Nutr* 2007;98:1288-98.
- 44 745 42. McMillan-Price J, Petocz P, Atkinson F, et al. Comparison of 4 diets of varying glycemic load on  
45 746 weight loss and cardiovascular risk reduction in overweight and obese young adults: a randomized  
46 747 controlled trial. *Arch Intern Med* 2006;166:1466-75.
- 47 748 43. Visek J, Lacigova S, Cechurova D, Rusavy Z. Comparison of a low-glycemic index vs standard  
48 749 diabetic diet. *Biomed Pap Med Fac Univ Palacky Olomouc Czech Repub* 2014;158:112-6.

- 1  
2  
3 750 44. Jenkins DJ, Kendall CW, Vuksan V, et al. Effect of lowering the glycemic load with canola oil on  
4 751 glycemic control and cardiovascular risk factors: a randomized controlled trial. *Diabetes Care*  
5 752 2014;37:1806-14.
- 6 753 45. Jenkins DJ, Kendall CW, Augustin LS, et al. Effect of legumes as part of a low glycemic index diet  
7 754 on glycemic control and cardiovascular risk factors in type 2 diabetes mellitus: a randomized controlled  
8 755 trial. *Arch Intern Med* 2012;172:1653-60.
- 9 756 46. Yusof BN, Talib RA, Kamaruddin NA, Karim NA, Chinna K, Gilbertson H. A low-GI diet is  
10 757 associated with a short-term improvement of glycaemic control in Asian patients with type 2 diabetes.  
11 758 *Diabetes Obes Metab* 2009;11:387-96.
- 12 759 47. Wolever TM, Gibbs AL, Mehling C, et al. The Canadian Trial of Carbohydrates in Diabetes (CCD),  
13 760 a 1-y controlled trial of low-glycemic-index dietary carbohydrate in type 2 diabetes: no effect on  
14 761 glycosylated hemoglobin but reduction in C-reactive protein. *Am J Clin Nutr* 2008;87:114-25.
- 15 762 48. Jenkins DJ, Kendall CW, McKeown-Eyssen G, et al. Effect of a low-glycemic index or a high-cereal  
16 763 fiber diet on type 2 diabetes: a randomized trial. *JAMA* 2008;300:2742-53.
- 17 764 49. Jimenez-Cruz A, Bacardi-Gascon M, Turnbull WH, Rosales-Garay P, Severino-Lugo I. A flexible,  
18 765 low-glycemic index mexican-style diet in overweight and obese subjects with type 2 diabetes improves  
19 766 metabolic parameters during a 6-week treatment period. *Diabetes Care* 2003;26:1967-70.
- 20 767 50. Heilbronn LK, Noakes M, Clifton PM. The effect of high- and low-glycemic index energy  
21 768 restricted diets on plasma lipid and glucose profiles in type 2 diabetic subjects with varying glycemic  
22 769 control. *J Am Coll Nutr* 2002;21:120-7.
- 23 770 51. Fontvieille AM, Acosta M, Rizkalla SW, et al. A moderate switch from high to low glycemic-index  
24 771 foods for 3 weeks improves metabolic control of type I (IDDM) diabetic subjects. . *Diabetes Nutr Metab*  
25 772 1988;1:139-43.
- 26 773 52. Frost GS, Brynes AE, Bovill-Taylor C, Dornhorst A. A prospective randomised trial to determine  
27 774 the efficacy of a low glycaemic index diet given in addition to healthy eating and weight loss advice in  
28 775 patients with coronary heart disease. *Eur J Clin Nutr* 2004;58:121-7.
- 29 776 53. de Assis Costa J, de Cassia Goncalves Alfensa R. The consumption of low glycemic meals reduces  
30 777 abdominal obesity in subjects with excess body weight. *Nutricion Hospitalaria* 2012;27:1178-83.
- 31 778 54. Fontvieille AM, Rizkalla SW, Penfornis A, Acosta M, Bornet FR, Slama G. The use of low  
32 779 glycaemic index foods improves metabolic control of diabetic patients over five weeks. *Diabet Med*  
33 780 1992;9:444-50.
- 34 781 55. Bibiloni MDM, Fernandez-Blanco J, Pujol-Plana N, et al. [Improving diet quality in children  
35 782 through a new nutritional education programme: INFADIMED]. *Gac Sanit* 2017.
- 36 783 56. Pounis G, Castelnuovo AD, Costanzo S, et al. Association of pasta consumption with body mass  
37 784 index and waist-to-hip ratio: results from Moli-sani and INHES studies. *Nutr Diabetes* 2016;6:e218.
- 38 785 57. Estruch R, Ros E, Salas-Salvado J, et al. Primary prevention of cardiovascular disease with a  
39 786 Mediterranean diet. *N Engl J Med* 2013;368:1279-90.
- 40 787 58. Shay CM, Van Horn L, Stamler J, et al. Food and nutrient intakes and their associations with  
41 788 lower BMI in middle-aged US adults: the International Study of Macro-/Micronutrients and Blood  
42 789 Pressure (INTERMAP). *Am J Clin Nutr* 2012;96:483-91.
- 43 790 59. Smith JD, Hou T, Ludwig DS, et al. Changes in intake of protein foods, carbohydrate amount and  
44 791 quality, and long-term weight change: results from 3 prospective cohorts. *Am J Clin Nutr* 2015;101:1216-  
45 792 24.
- 46 793 60. Granfeldt Y, Bjorck I. Glycemic response to starch in pasta: a study of mechanisms of limited  
47 794 enzyme availability. . *J Cereal Sci* 1991;14:47-61.
- 48 795 61. Granfeldt Y, Bjorck I, Hagander B. On the importance of processing conditions, product thickness  
49 796 and egg addition for the glycaemic and hormonal responses to pasta: a comparison with bread made  
50 797 from 'pasta ingredients'. *Eur J Clin Nutr* 1991;45:489-99.

- 1  
2  
3 798 62. Frost GS, Brynes AE, Dhillon WS, Bloom SR, McBurney MI. The effects of fiber enrichment of pasta  
4 799 and fat content on gastric emptying, GLP-1, glucose, and insulin responses to a meal. *Eur J Clin Nutr*  
5 800 2003;57:293-8.
- 6 801 63. Korczak R, Timm D, Ahnen R, Thomas W, Slavin JL. High Protein Pasta is Not More Satiating than  
7 802 High Fiber Pasta at a Lunch Meal, Nor Does it Decrease Mid-Afternoon Snacking in Healthy Men and  
8 803 Women. *J Food Sci* 2016;81:S2240-5.
- 9 804 64. Atkinson FS, Foster-Powell K, Brand-Miller JC. International tables of glycemic index and  
10 805 glycemic load values: 2008. *Diabetes Care* 2008;31:2281-3.
- 11 806 65. Ludwig DS. Dietary glycemic index and obesity. *J Nutr* 2000;130:280S-3S.
- 12 807 66. Riccardi G, Rivellese AA, Giacco R. Role of glycemic index and glycemic load in the healthy state,  
13 808 in prediabetes, and in diabetes. *Am J Clin Nutr* 2008;87:269S-74S.
- 14 809 67. Saris WH, Astrup A, Prentice AM, et al. Randomized controlled trial of changes in dietary  
15 810 carbohydrate/fat ratio and simple vs complex carbohydrates on body weight and blood lipids: the  
16 811 CARMEN study. The Carbohydrate Ratio Management in European National diets. *Int J Obes Relat*  
17 812 *Metab Disord* 2000;24:1310-8.
- 18 813 68. Ludwig DS, Majzoub JA, Al-Zahrani A, Dallal GE, Blanco I, Roberts SB. High glycemic index foods,  
19 814 overeating, and obesity. *Pediatrics* 1999;103:E26.
- 20 815 69. Wang J, Thornton JC, Bari S, et al. Comparisons of waist circumferences measured at 4 sites. *Am*  
21 816 *J Clin Nutr* 2003;77:379-84.
- 22 817 70. Makarem N, Scott M, Quatromoni P, Jacques P, Parekh N. Trends in dietary carbohydrate  
23 818 consumption from 1991 to 2008 in the Framingham Heart Study Offspring Cohort. *Br J Nutr*  
24 819 2014;111:2010-23.
- 25 820 71. Rehm CD, Penalvo JL, Afshin A, Mozaffarian D. Dietary Intake Among US Adults, 1999-2012.  
26 821 *JAMA* 2016;315:2542-53.
- 27 822 72. Golzarand M, Mirmiran P, Jessri M, Toolabi K, Mojarrad M, Azizi F. Dietary trends in the Middle  
28 823 East and North Africa: an ecological study (1961 to 2007). *Public Health Nutr* 2012;15:1835-44.
- 29 824 73. Leclercq C, Arcella D, Piccinelli R, et al. The Italian National Food Consumption Survey INRAN-  
30 825 SCAI 2005-06: main results in terms of food consumption. *Public Health Nutr* 2009;12:2504-32.
- 31 826 74. Bonaccio M, Di Castelnuovo A, Bonanni A, et al. Decline of the Mediterranean diet at a time of  
32 827 economic crisis. Results from the Moli-sani study. *Nutr Metab Cardiovasc Dis* 2014;24:853-60.
- 33 828 75. Sofi F, Innocenti G, Dini C, et al. Low adherence of a clinically healthy Italian population to  
34 829 nutritional recommendations for primary prevention of chronic diseases. *Nutr Metab Cardiovasc Dis*  
35 830 2006;16:436-44.
- 36 831 76. Ferdman RA. This is what happens when everyone is terrified of carbs. *The Washington Post*  
37 832 2015 September 2, 2015.
- 38 833 77. Johnston BC, Kanters S, Bandayrel K, et al. Comparison of weight loss among named diet  
39 834 programs in overweight and obese adults: a meta-analysis. *JAMA* 2014;312:923-33.
- 40 835 78. Stone NJ, Robinson JG, Lichtenstein AH, et al. 2013 ACC/AHA guideline on the treatment of  
41 836 blood cholesterol to reduce atherosclerotic cardiovascular risk in adults: a report of the American  
42 837 College of Cardiology/American Heart Association Task Force on Practice Guidelines. *Circulation*  
43 838 2014;129:S1-45.
- 44 839 79. Anderson TJ, Gregoire J, Hegele RA, et al. 2012 update of the Canadian Cardiovascular Society  
45 840 guidelines for the diagnosis and treatment of dyslipidemia for the prevention of cardiovascular disease  
46 841 in the adult. *The Canadian journal of cardiology* 2013;29:151-67.

842

843

1  
2  
3 844 **Figure Legend**  
4

5 845 **Figure 1:** Literature Search  
6

7 846 **Figure 2:** Forest plot of randomized controlled trials investigating the effects of pasta in the  
8 847 context of low-GI dietary patterns on body weight (kg). n = 2448. Data are expressed as mean  
9 848 differences represented by a square and 95% CIs by the line through the square. 95% CIs  
10 849 exceeding the plot's bounds are represented by an arrowhead. Pooled effect estimates are  
11 850 represented by diamonds and were estimated with the use of generic inverse variance random  
12 851 effects models. Between-study heterogeneity was detected with the use of the Cochran's Q  
13 852 statistic at a significance level of  $P < 0.10$  and quantified with the use of the  $I^2$  statistic where  
14 853  $I^2 \geq 50\%$  is considered to be evidence of substantial heterogeneity and  $\geq 75\%$  considerable  
15 854 heterogeneity.

16 855 CHD, coronary heart disease; CHO, carbohydrate; CI, confidence interval; HGI, higher glycemic  
17 856 index diet; GI, glycemic index; LGI, low glycemic index diet; MUFA, monounsaturated fatty  
18 857 acids; Pro, protein.  
19  
20  
21 858  
22

23 859 **Figure 3:** Plot of pooled effect estimates from randomized controlled trials investigating the  
24 860 effects of pasta in the context of low-GI dietary patterns on global and abdominal markers of  
25 861 adiposity. Pooled effect estimates are represented by diamonds and were estimated with the use  
26 862 of generic inverse variance random effects models. Between-study heterogeneity was detected  
27 863 with the use of the Cochran's Q statistic at a significance level of  $P < 0.10$  and quantified with the  
28 864 use of the  $I^2$  statistic where  $I^2 \geq 50\%$  is considered to be evidence of substantial heterogeneity and  
29 865  $\geq 75\%$  considerable heterogeneity.

30 866 BMI; body mass index; CI, confidence interval; HGI, higher glycemic index diet; GI, glycemic  
31 867 index; LGI, low glycemic index diet.  
32  
33  
34  
35  
36  
37  
38  
39  
40  
41  
42  
43  
44  
45  
46  
47  
48  
49  
50  
51  
52  
53  
54  
55  
56  
57  
58  
59  
60

868 **Table 1:** Summary of trial characteristics

| <b>Trial Characteristics*</b>                                  | <b>ALL</b>         | <b>Neutral Energy Balance</b> | <b>Negative Energy Balance</b> |
|----------------------------------------------------------------|--------------------|-------------------------------|--------------------------------|
| <b>Trial Number (n)</b>                                        | 32                 | 23                            | 9                              |
| <b>Trial Size (total, range)</b>                               | 2448 (8 - 250)     | 1989 (8 - 250)                | 459 (13 - 123)                 |
| <b>Male: Female<sup>a</sup> (%)</b>                            | 40:60              | 47:53                         | 27:73                          |
| <b>Age (years)</b>                                             | 50 (40 - 58)       | 52.0 (42.1 – 59.5)            | 49.5 (34.2 – 53.0)             |
| <b>Metabolic Phenotype (OW/OB:DM:CHD) (%)</b>                  | 66:31:3            | 57:39:4                       | 89:11:0                        |
| <b>Setting (IP:OP) (%)</b>                                     | 3:97               | 4:96                          | 0:100                          |
| <b>Baseline Body Weight (kg)<sup>b</sup></b>                   | 85.5 (80.0 - 91.9) | 84.1 (79.5 – 87.5)            | 92.5 (86.1 – 93.9)             |
| <b>Baseline BMI (kg/m<sup>2</sup>)<sup>c</sup></b>             | 30.4 (28.2 - 32.0) | 29.5 (27.4 – 31.4)            | 31.7 (30.1 – 32.9)             |
| <b>Study Design (C:P) (%)</b>                                  | 19:81              | 26:74                         | 0:100                          |
| <b>Dose Pasta (servings/week)<sup>d</sup></b>                  | 3.3 (2.3 - 3.5)    | 3.4 (2.9 – 4.1)               | 2.3 (2.3-3.5)                  |
| <b>GI in Pasta/LGI group</b>                                   | 49.0 (44.0 - 55.1) | 46.5 (49.9 – 55.5)            | 44.0 (42.3 - 49.4)             |
| <b>GI in Higher GI group</b>                                   | 62.5 (61.6 - 63.2) | 63.3 (60.1 – 64.4)            | 61.0 (59.2 – 66.6)             |
| <b>Calorie reduction in Pasta/LGI group (kcal)<sup>e</sup></b> | -179 (-90 - -448)  | -165 (-74 - -313)             | -447 (-134 - -594)             |
| <b>Calorie reduction in Higher GI group (kcal)<sup>e</sup></b> | -181 (-93 - -401)  | -160 (-40 - -248)             | -470 (-172 - -561)             |
| <b>Feeding Control (Met:Supp:DA) (%)</b>                       | 6:44:50            | 4:48:48                       | 11:33:56                       |
| <b>Follow-Up Duration (Weeks)</b>                              | 12 (9-21)          | 12 (6-24)                     | 12 (10 - 21)                   |
| <b>Funding Sources (A:I:AI:NR) (%)</b>                         | 47:9:25:19         | 44:13:26:17                   | 56:0:22:22                     |

869  
870 \* median (inter quartile range), unless otherwise indicated

871 <sup>a</sup>24/32 trials provided data on sex

872 <sup>b</sup> 30/32 trials reported baseline body weight

873 <sup>c</sup> 28/32 trials reported baseline BMI

874 <sup>d</sup> 11/32 trials provided data from which dose could be approximated

875 <sup>e</sup> 20/32 trials provided data from which to approximate changes in caloric intake

876 A, agency; AI, agency and industry; BMI, body mass index; C, crossover design; CHD, coronary  
877 heart disease; DA, dietary advice; DM, diabetes; GI, glycemic index; I, industry; IP, inpatient;  
878 LGI, low glycemic index; Met, metabolic; NR, not reported; OB, obese; OP, outpatient; OW,  
879 overweight; P, parallel design; Suppl, supplemented/provision of certain food

1  
2  
3  
4  
5  
6  
7  
8  
9  
10  
11  
12  
13  
14  
15  
16  
17  
18  
19  
20  
21  
22  
23  
24  
25  
26  
27  
28  
29  
30  
31  
32  
33  
34  
35  
36  
37  
38  
39  
40  
41  
42  
43  
44  
45  
46  
47  
48  
49  
50  
51  
52  
53  
54  
55  
56  
57  
58  
59  
60

For peer review only

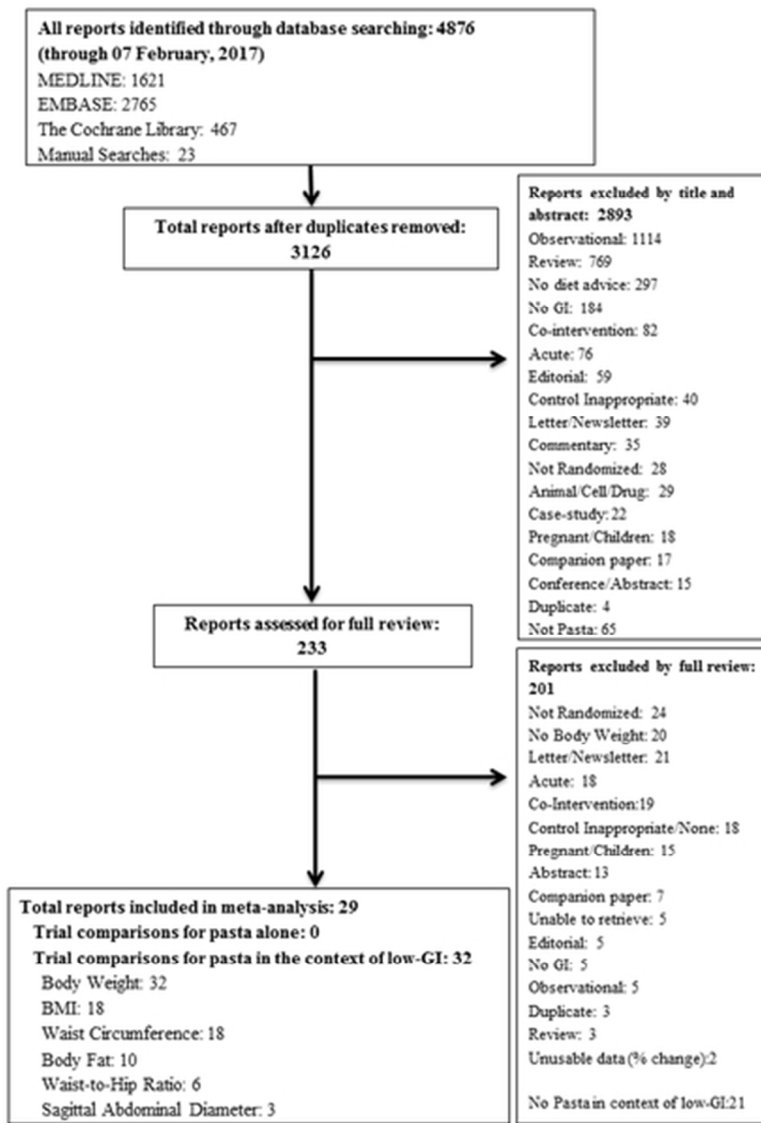

Figure 1: Literature Search

40x54mm (300 x 300 DPI)





Figure 2: Forest plot of randomized controlled trials investigating the effects of pasta in the context of low-GI dietary patterns on body weight (kg). n = 2448. Data are expressed as mean differences represented by a square and 95% CIs by the line through the square. 95% CIs exceeding the plot's bounds are represented by an arrowhead. Pooled effect estimates are represented by diamonds and were estimated with the use of generic inverse variance random effects models. Between-study heterogeneity was detected with the use of the Cochran's Q statistic at a significance level of P<0.10 and quantified with the use of the I<sup>2</sup> statistic where I<sup>2</sup>≥50% is considered to be evidence of substantial heterogeneity and ≥75% considerable heterogeneity.

CHD, coronary heart disease; CHO, carbohydrate; CI, confidence interval; HGI, higher glycemic index diet; GI, glycemic index; LGI, low glycemic index diet; MUFA, monounsaturated fatty acids; Pro, protein.

40x54mm (300 x 300 DPI)

1  
2  
3  
4  
5  
6  
7  
8  
9  
10  
11  
12  
13  
14  
15  
16  
17  
18  
19  
20  
21  
22  
23  
24  
25  
26  
27  
28  
29  
30  
31  
32  
33  
34  
35  
36  
37  
38  
39  
40  
41  
42  
43  
44  
45  
46  
47  
48  
49  
50  
51  
52  
53  
54  
55  
56  
57  
58  
59  
60

For peer review only

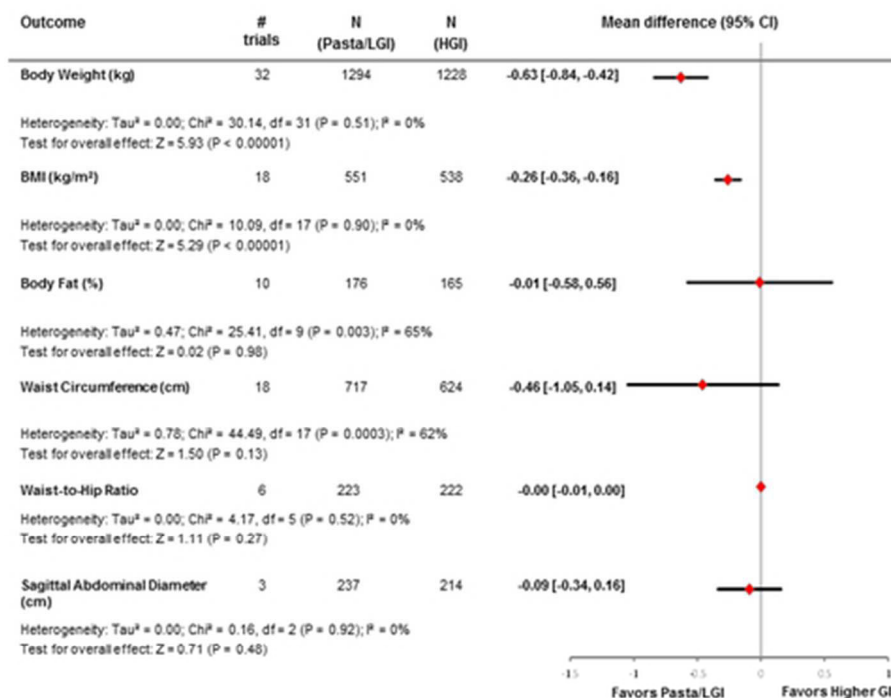

Figure 3: Plot of pooled effect estimates from randomized controlled trials investigating the effects of pasta in the context of low-GI dietary patterns on global and abdominal markers of adiposity. Pooled effect estimates are represented by diamonds and were estimated with the use of generic inverse variance random effects models. Between-study heterogeneity was detected with the use of the Cochran’s Q statistic at a significance level of  $P < 0.10$  and quantified with the use of the I<sup>2</sup> statistic where  $I^2 \geq 50\%$  is considered to be evidence of substantial heterogeneity and  $\geq 75\%$  considerable heterogeneity.

BMI; body mass index; CI, confidence interval; HGI, higher glycemic index diet; LGI, low glycemic index diet.

40x54mm (300 x 300 DPI)

## Online Supplemental Information

### Table of Contents

|                                                                                                                                                                                                       |    |
|-------------------------------------------------------------------------------------------------------------------------------------------------------------------------------------------------------|----|
| Supplemental Tables.....                                                                                                                                                                              | 4  |
| Supplemental Table S1: PRISMA Checklist .....                                                                                                                                                         | 4  |
| Supplemental Table S2: Search strategy for studies assessing the effect of pasta in the context of low-GI dietary patterns on body weight in randomized controlled trials .....                       | 7  |
| Supplemental Table S3: PICO framework of the search strategy.....                                                                                                                                     | 9  |
| Supplement Table S4a: Trial characteristics .....                                                                                                                                                     | 10 |
| Supplement Table S4b: Trial characteristics continued.....                                                                                                                                            | 11 |
| Supplement Table S4c: Trial characteristics continued .....                                                                                                                                           | 12 |
| Supplement Table S4d: Trial characteristics continued.....                                                                                                                                            | 13 |
| Supplement Table S4e: Trial characteristics continued.....                                                                                                                                            | 14 |
| Supplemental Table S5: Sensitivity analysis of the systematic removal of each trial* .....                                                                                                            | 15 |
| Supplemental Table S6: Sensitivity analyses of the use of correlation coefficients of 0.25 and 0.75 for crossover trials.....                                                                         | 18 |
| Supplement Table S7. Continuous meta-regression analysis for the effect of pasta in the context of low-GI dietary patterns on body weight (kg) <sup>1</sup> .....                                     | 19 |
| Supplemental Table S8. Continuous meta-regression analysis for the effect of pasta in the context of low-GI dietary patterns on BMI (kg/m <sup>2</sup> ) <sup>1</sup> .....                           | 21 |
| Supplemental Table S9. Continuous meta-regression analysis for the effect of pasta in the context of low-GI dietary patterns on body fat (%) <sup>1</sup> .....                                       | 23 |
| Supplemental Table S10. Continuous meta-regression analysis for the effect of pasta in the context of low-GI dietary patterns on waist circumference (cm) <sup>1</sup> .....                          | 25 |
| Supplementary Table S11. Post-hoc piecewise linear continuous dose-response meta-regression analyses for the effect of pasta intake in the context of low-GI dietary patterns on body weight (kg). 27 |    |
| Supplementary Table S12: GRADE assessment of study quality .....                                                                                                                                      | 28 |
| Supplemental Figures .....                                                                                                                                                                            | 32 |
| Supplemental Figure S1: Cochrane risk of bias summary for all included trials.....                                                                                                                    | 32 |
| Supplemental Figure S2: Risk of bias proportion graph for all included trials.....                                                                                                                    | 33 |
| Supplemental Figure S3: Forest plot of randomized controlled trials investigating the effects of pasta in the context of low-GI dietary patterns on BMI (kg/m <sup>2</sup> ) (n= 1038) .....          | 34 |
| Supplemental Figure S4: Forest plot of randomized controlled trials investigating the effects of pasta in the context of low-GI dietary patterns on body fat (%) (n= 285) .....                       | 35 |

|    |                                                                                                                 |    |
|----|-----------------------------------------------------------------------------------------------------------------|----|
| 1  |                                                                                                                 |    |
| 2  |                                                                                                                 |    |
| 3  | Supplemental Figure S5: Forest plot of randomized controlled trials investigating the effects of pasta          |    |
| 4  | in the context of low-GI dietary patterns on waist circumference (cm) (n = 1380) .....                          | 36 |
| 5  |                                                                                                                 |    |
| 6  | Supplemental Figure S6: Forest plot of randomized controlled trials investigating the effects of pasta          |    |
| 7  | in the context of low-GI dietary patterns on waist-to-hip ratio (n = 445) .....                                 | 37 |
| 8  |                                                                                                                 |    |
| 9  | Supplemental Figure S7: Forest plot of randomized controlled trials investigating the effects of pasta          |    |
| 10 | in the context of low-GI dietary patterns on sagittal abdominal diameter (cm) (n = 478) .....                   | 38 |
| 11 |                                                                                                                 |    |
| 12 | Supplemental Figure S8: Forest plot of randomized controlled trials investigating the effects of pasta          |    |
| 13 | in the context of low-GI dietary patterns on body weight (kg) using fixed effects models (n = 2448) ..          | 39 |
| 14 |                                                                                                                 |    |
| 15 | Supplemental Figure S9: Forest plot of randomized controlled trials which contain data for                      |    |
| 16 | approximating pasta intake which are investigating the effects of pasta in the context of low-GI                |    |
| 17 | dietary patterns on body weight (kg) (n = 740) .....                                                            | 40 |
| 18 |                                                                                                                 |    |
| 19 | Supplemental Figure S10: Subgroup analysis for mean differences (95% CIs) of the effects of pasta in            |    |
| 20 | the context of low-GI dietary patterns on body weight (kg) (n = 2448) .....                                     | 41 |
| 21 |                                                                                                                 |    |
| 22 | Supplemental Figure S11: Subgroup analysis for mean differences (95% CIs) of the effects of pasta in            |    |
| 23 | the context of low-GI dietary patterns on body weight (kg) continued (n = 2448) .....                           | 43 |
| 24 |                                                                                                                 |    |
| 25 | Supplemental Figure S12: A priori subgroup analyses on risk of bias for mean differences (95% CIs) of           |    |
| 26 | the effect of pasta in the context of low-GI dietary patterns on body weight (kg) (n = 2448) .....              | 45 |
| 27 |                                                                                                                 |    |
| 28 | Supplemental Figure S13: Subgroup analysis for mean differences (95% CIs) of the effects of pasta in            |    |
| 29 | the context of low-GI dietary patterns on body mass index, BMI (kg/m <sup>2</sup> ) (n = 1038) .....            | 47 |
| 30 |                                                                                                                 |    |
| 31 | Supplemental Figure S14: Subgroup analysis for mean differences (95% CIs) of the effects of pasta in            |    |
| 32 | the context of low-GI dietary patterns on body mass index, BMI (kg/m <sup>2</sup> ) continued (n = 1038) .....  | 49 |
| 33 |                                                                                                                 |    |
| 34 | Supplemental Figure S15: A priori subgroup analyses on risk of bias for mean differences (95% CIs) of           |    |
| 35 | the effect of pasta in the context of low-GI dietary patterns on body mass index, BMI (kg/m <sup>2</sup> ) (n = |    |
| 36 | 1038) .....                                                                                                     | 51 |
| 37 |                                                                                                                 |    |
| 38 | Supplemental Figure S16: Subgroup analysis for mean differences (95% CIs) of the effects of pasta in            |    |
| 39 | the context of low-GI dietary patterns on body fat (%) (n = 285) .....                                          | 53 |
| 40 |                                                                                                                 |    |
| 41 | Supplemental Figure S17: A priori subgroup analyses on risk of bias for mean differences (95% CIs) of           |    |
| 42 | the effect of pasta in the context of low-GI dietary patterns on body fat (%) (n = 285) .....                   | 55 |
| 43 |                                                                                                                 |    |
| 44 | Supplemental Figure S18: Subgroup analysis for mean differences (95% CIs) of the effects of pasta in            |    |
| 45 | the context of low-GI dietary patterns on waist circumference (cm) (n = 1380) .....                             | 57 |
| 46 |                                                                                                                 |    |
| 47 | Supplemental Figure S19: Subgroup analysis for mean differences (95% CIs) of the effects of pasta in            |    |
| 48 | the context of low-GI dietary patterns on waist circumference (cm) continued (n = 1380) .....                   | 59 |
| 49 |                                                                                                                 |    |
| 50 | Supplemental Figure S20: A priori subgroup analyses on risk of bias for mean differences (95% CIs) of           |    |
| 51 | the effect of pasta in the context of low-GI dietary patterns on waist circumference (cm) (n = 1380). 61        |    |
| 52 |                                                                                                                 |    |
| 53 | Supplemental Figure S21: Continuous meta-regression of change in carbohydrate intake in the low-GI              |    |
| 54 | dietary pattern intervention arms with change in body weight (n=19) .....                                       | 63 |
| 55 |                                                                                                                 |    |
| 56 |                                                                                                                 |    |
| 57 |                                                                                                                 |    |
| 58 |                                                                                                                 |    |
| 59 |                                                                                                                 |    |
| 60 |                                                                                                                 |    |

|    |                                                                                                        |
|----|--------------------------------------------------------------------------------------------------------|
| 1  |                                                                                                        |
| 2  |                                                                                                        |
| 3  | Supplemental Figure S22: Continuous meta-regression of change in protein intake in the low-GI          |
| 4  | dietary pattern intervention arms with change in body weight (n=19) ..... 64                           |
| 5  |                                                                                                        |
| 6  | Supplemental Figure S23: Pasta intake dose-response analyses by spline curve modeling (MKSPLINE        |
| 7  | procedure) ..... 65                                                                                    |
| 8  |                                                                                                        |
| 9  | Supplemental Figure S24: Funnel plot for the effect of pasta in the context of low-GI dietary patterns |
| 10 | on body weight (kg) ..... 66                                                                           |
| 11 |                                                                                                        |
| 12 | Supplemental Figure S25: Funnel plot for the effect of pasta in the context of low-GI dietary patterns |
| 13 | on BMI (kg/m <sup>2</sup> ) ..... 67                                                                   |
| 14 |                                                                                                        |
| 15 | Supplemental Figure S26: Funnel plot for the effect of pasta in the context of low-GI dietary patterns |
| 16 | on body fat (%) ..... 68                                                                               |
| 17 |                                                                                                        |
| 18 | Supplemental Figure S27: Funnel plot for the effect of pasta in the context of low-GI dietary patterns |
| 19 | on waist circumference (cm) ..... 69                                                                   |
| 20 |                                                                                                        |
| 21 |                                                                                                        |
| 22 |                                                                                                        |
| 23 |                                                                                                        |
| 24 |                                                                                                        |
| 25 |                                                                                                        |
| 26 |                                                                                                        |
| 27 |                                                                                                        |
| 28 |                                                                                                        |
| 29 |                                                                                                        |
| 30 |                                                                                                        |
| 31 |                                                                                                        |
| 32 |                                                                                                        |
| 33 |                                                                                                        |
| 34 |                                                                                                        |
| 35 |                                                                                                        |
| 36 |                                                                                                        |
| 37 |                                                                                                        |
| 38 |                                                                                                        |
| 39 |                                                                                                        |
| 40 |                                                                                                        |
| 41 |                                                                                                        |
| 42 |                                                                                                        |
| 43 |                                                                                                        |
| 44 |                                                                                                        |
| 45 |                                                                                                        |
| 46 |                                                                                                        |
| 47 |                                                                                                        |
| 48 |                                                                                                        |
| 49 |                                                                                                        |
| 50 |                                                                                                        |
| 51 |                                                                                                        |
| 52 |                                                                                                        |
| 53 |                                                                                                        |
| 54 |                                                                                                        |
| 55 |                                                                                                        |
| 56 |                                                                                                        |
| 57 |                                                                                                        |
| 58 |                                                                                                        |
| 59 |                                                                                                        |
| 60 |                                                                                                        |

## Supplemental Tables

### Supplemental Table S1: PRISMA Checklist

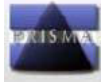

## PRISMA 2009 Checklist

| Section/topic             | #  | Checklist item                                                                                                                                                                                                                                                                                              | Reported on page #         |
|---------------------------|----|-------------------------------------------------------------------------------------------------------------------------------------------------------------------------------------------------------------------------------------------------------------------------------------------------------------|----------------------------|
| <b>TITLE</b>              |    |                                                                                                                                                                                                                                                                                                             |                            |
| Title                     | 1  | Identify the report as a systematic review, meta-analysis, or both.                                                                                                                                                                                                                                         | 1                          |
| <b>ABSTRACT</b>           |    |                                                                                                                                                                                                                                                                                                             |                            |
| Structured summary        | 2  | Provide a structured summary including, as applicable: background; objectives; data sources; study eligibility criteria, participants, and interventions; study appraisal and synthesis methods; results; limitations; conclusions and implications of key findings; systematic review registration number. | 2-3                        |
| <b>INTRODUCTION</b>       |    |                                                                                                                                                                                                                                                                                                             |                            |
| Rationale                 | 3  | Describe the rationale for the review in the context of what is already known.                                                                                                                                                                                                                              | 4                          |
| Objectives                | 4  | Provide an explicit statement of questions being addressed with reference to participants, interventions, comparisons, outcomes, and study design (PICOS).                                                                                                                                                  | 4                          |
| <b>METHODS</b>            |    |                                                                                                                                                                                                                                                                                                             |                            |
| Protocol and registration | 5  | Indicate if a review protocol exists, if and where it can be accessed (e.g., Web address), and, if available, provide registration information including registration number.                                                                                                                               | 5                          |
| Eligibility criteria      | 6  | Specify study characteristics (e.g., PICOS, length of follow-up) and report characteristics (e.g., years considered, language, publication status) used as criteria for eligibility, giving rationale.                                                                                                      | 5-6, Supplemental Table S2 |
| Information sources       | 7  | Describe all information sources (e.g., databases with dates of coverage, contact with study authors to identify additional studies) in the search and date last searched.                                                                                                                                  | 5, Supplemental Table S1   |
| Search                    | 8  | Present full electronic search strategy for at least one database, including any limits used, such that it could be repeated.                                                                                                                                                                               | Supplemental Table S1      |
| Study selection           | 9  | State the process for selecting studies (i.e., screening, eligibility, included in systematic review, and, if applicable, included in the meta-analysis).                                                                                                                                                   | 5-6, Figure 1              |
| Data collection process   | 10 | Describe method of data extraction from reports (e.g., piloted forms, independently, in duplicate) and any processes for obtaining and confirming data from investigators.                                                                                                                                  | 6                          |

|                                    |          |                                                                                                                                                                                                                        |                                                |
|------------------------------------|----------|------------------------------------------------------------------------------------------------------------------------------------------------------------------------------------------------------------------------|------------------------------------------------|
| Data items                         | 11       | List and define all variables for which data were sought (e.g., PICOS, funding sources) and any assumptions and simplifications made.                                                                                  | 6, Supplemental Table S2                       |
| Risk of bias in individual studies | 12       | Describe methods used for assessing risk of bias of individual studies (including specification of whether this was done at the study or outcome level), and how this information is to be used in any data synthesis. | 6-7                                            |
| Summary measures                   | 13       | State the principal summary measures (e.g., risk ratio, difference in means).                                                                                                                                          | 7-8                                            |
| Synthesis of results               | 14       | Describe the methods of handling data and combining results of studies, if done, including measures of consistency (e.g., $I^2$ ) for each meta-analysis.                                                              | 8                                              |
| <b>Section/topic</b>               | <b>#</b> | <b>Checklist item</b>                                                                                                                                                                                                  | <b>Reported on page #</b>                      |
| Risk of bias across studies        | 15       | Specify any assessment of risk of bias that may affect the cumulative evidence (e.g., publication bias, selective reporting within studies).                                                                           | 9                                              |
| Additional analyses                | 16       | Describe methods of additional analyses (e.g., sensitivity or subgroup analyses, meta-regression), if done, indicating which were pre-specified.                                                                       | 7-10                                           |
| <b>RESULTS</b>                     |          |                                                                                                                                                                                                                        |                                                |
| Study selection                    | 17       | Give numbers of studies screened, assessed for eligibility, and included in the review, with reasons for exclusions at each stage, ideally with a flow diagram.                                                        | 10, Figure 1                                   |
| Study characteristics              | 18       | For each study, present characteristics for which data were extracted (e.g., study size, PICOS, follow-up period) and provide the citations.                                                                           | 10-11, Table 1, Supplemental Tables S2-S3      |
| Risk of bias within studies        | 19       | Present data on risk of bias of each study and, if available, any outcome level assessment (see item 12).                                                                                                              | 11, Supplemental Figures S1-S2                 |
| Results of individual studies      | 20       | For all outcomes considered (benefits or harms), present, for each study: (a) simple summary data for each intervention group (b) effect estimates and confidence intervals, ideally with a forest plot.               | 11-13, Figures 2-3, Supplemental Figures S3-S7 |
| Synthesis of results               | 21       | Present results of each meta-analysis done, including confidence intervals and measures of consistency.                                                                                                                | 11-13, Figures 2-3, Supplemental Figures S3-S7 |
| Risk of bias across studies        | 22       | Present results of any assessment of risk of bias across studies (see Item 15).                                                                                                                                        | 11,15 Supplemental                             |



|                     |    |                                                                                                                                                                                      |                                                                |
|---------------------|----|--------------------------------------------------------------------------------------------------------------------------------------------------------------------------------------|----------------------------------------------------------------|
|                     |    |                                                                                                                                                                                      | Table S1, S2, S12, S15, S17, S20                               |
| Additional analysis | 23 | Give results of additional analyses, if done (e.g., sensitivity or subgroup analyses, meta-regression [see Item 16]).                                                                | 12-16, Supplemental Tables S4-S10, Supplemental Figures S8-S26 |
| <b>DISCUSSION</b>   |    |                                                                                                                                                                                      |                                                                |
| Summary of evidence | 24 | Summarize the main findings including the strength of evidence for each main outcome; consider their relevance to key groups (e.g., healthcare providers, users, and policy makers). | 16-22                                                          |
| Limitations         | 25 | Discuss limitations at study and outcome level (e.g., risk of bias), and at review-level (e.g., incomplete retrieval of identified research, reporting bias).                        | 19-21                                                          |
| Conclusions         | 26 | Provide a general interpretation of the results in the context of other evidence, and implications for future research.                                                              | 22-23                                                          |
| <b>FUNDING</b>      |    |                                                                                                                                                                                      |                                                                |
| Funding             | 27 | Describe sources of funding for the systematic review and other support (e.g., supply of data); role of funders for the systematic review.                                           | 26-31                                                          |

From: Moher D, Liberati A, Tetzlaff J, Altman DG, The PRISMA Group (2009). Preferred Reporting Items for Systematic Reviews and Meta-Analyses: The PRISMA Statement. PLoS Med 6(7): e1000097. doi:10.1371/journal.pmed1000097

For more information, visit: [www.prisma-statement.org](http://www.prisma-statement.org).

**Supplemental Table S2: Search strategy for studies assessing the effect of pasta in the context of low-GI dietary patterns on body weight in randomized controlled trials**

| Database | Search Period             | Search Terms                                                                                                                                                                                                                                                                                                                                                                                                                                                                                                                                                                                                                                                                                                                                     |
|----------|---------------------------|--------------------------------------------------------------------------------------------------------------------------------------------------------------------------------------------------------------------------------------------------------------------------------------------------------------------------------------------------------------------------------------------------------------------------------------------------------------------------------------------------------------------------------------------------------------------------------------------------------------------------------------------------------------------------------------------------------------------------------------------------|
| Medline  | 1946 to February 07, 2017 | <ol style="list-style-type: none"> <li>1. pasta/</li> <li>2. spaghetti/</li> <li>3. macaroni/</li> <li>4. lasagna/</li> <li>5. fusilli/</li> <li>6. noodle/</li> <li>7. glycaemic index.tw.</li> <li>8. glycemic index.tw.</li> <li>9. glycaemic ind*.tw.</li> <li>10. glycemic ind*.tw.</li> <li>11. glycemic load*.tw.</li> <li>12. glycaemic load*.tw.</li> <li>13. glycemic index/</li> <li>14. body mass index/</li> <li>15. body mass index.tw.</li> <li>16. BMI.tw.</li> <li>17. overweight.tw.</li> <li>18. weight*.tw.</li> <li>19. 1 or 2 or 3 or 4 or 5 or 6 or 7 or 8 or 9 or 10 or 11 or 12 or 13</li> <li>20. 14 or 15 or 16 or 17 or 18</li> <li>21. 19 and 20</li> <li>22. limit 21 to animals</li> <li>23. 21 not 22</li> </ol> |
| Embase   | 1946 to February 07, 2017 | <ol style="list-style-type: none"> <li>1. pasta/</li> <li>2. spaghetti/</li> <li>3. macaroni/</li> <li>4. lasagna/</li> <li>5. fusilli/</li> <li>6. noodle/</li> <li>7. glycaemic index.tw.</li> <li>8. glycemic index.tw.</li> <li>9. glycaemic ind*.tw.</li> <li>10. glycemic ind*.tw.</li> <li>11. glycemic load*.tw.</li> <li>12. glycaemic load*.tw.</li> <li>13. glycemic index/</li> <li>14. body mass index/</li> <li>15. body mass index.tw.</li> <li>16. BMI.tw.</li> <li>17. overweight.tw.</li> <li>18. weight*.tw.</li> </ol>                                                                                                                                                                                                       |

|                      |                           |                                                                                                                                                                                                                                                                                                                                                                                                                                                                                                                                                                            |
|----------------------|---------------------------|----------------------------------------------------------------------------------------------------------------------------------------------------------------------------------------------------------------------------------------------------------------------------------------------------------------------------------------------------------------------------------------------------------------------------------------------------------------------------------------------------------------------------------------------------------------------------|
|                      |                           | <p>19. 1 or 2 or 3 or 4 or 5 or 6 or 7 or 8 or 9 or 10 or 11 or 12 or 13<br/> 20. 14 or 15 or 16 or 17 or 18<br/> 21. 19 and 20<br/> 22. limit 21 to animals<br/> 23. 21 not 22</p>                                                                                                                                                                                                                                                                                                                                                                                        |
| The Cochrane Library | 1946 to February 07, 2017 | <p>1. pasta/<br/> 2. spaghetti/<br/> 3. macaroni/<br/> 4. lasagna/<br/> 5. fusilli/<br/> 6. noodle/<br/> 7. glycemic index/<br/> 8. glycaemic ind*.tw.<br/> 9. glycemic ind*.tw.<br/> 10. glycemic load*.tw.<br/> 11. glycaemic load*.tw.<br/> 12. exp body weight/<br/> 13. body weight*.tw.<br/> 14. BMI.tw.<br/> 15. body mass index/<br/> 16. body mass index.tw.<br/> 17. weight*.tw.<br/> 18. 1 or 2 or 3 or 4 or 5 or 6 or 7 or 8 or 9 or 10 or 11<br/> 19. 12 or 13 or 14 or 15 or 16 or 17<br/> 20. 18 and 19<br/> 21. limit 20 to animals<br/> 22. 20 not 21</p> |

1  
2  
3  
4  
5  
6  
7  
8  
9  
10  
11  
12  
13  
14  
15  
16  
17  
18  
19  
20  
21  
22  
23  
24  
25  
26  
27  
28  
29  
30  
31  
32  
33  
34  
35  
36  
37  
38  
39  
40  
41  
42  
43  
44  
45  
46  
47

**Supplemental Table S3: PICO framework of the search strategy**

| <b>PICO framework<sup>a</sup> defined in the present systematic review and meta-analysis</b> |                                                                                     |                                                                                    |                                                                                                   |
|----------------------------------------------------------------------------------------------|-------------------------------------------------------------------------------------|------------------------------------------------------------------------------------|---------------------------------------------------------------------------------------------------|
| <b>Participants</b>                                                                          | <b>Interventions</b>                                                                | <b>Comparators</b>                                                                 | <b>Outcomes</b>                                                                                   |
| Adult men and women excluding pregnant or breastfeeding women                                | Low glyceic index interventions where pasta is included as part of the intervention | Higher glyceic index diets where pasta is not included as part of the intervention | Body weight<br>Body mass index (BMI)<br>Body Fat (%)<br>Waist circumference<br>Waist-to-hip ratio |

a Moher D, Shamseer L, Clarke M, Ghersi D, Liberati A, Petticrew M, Shekelle P, Stewart LA and PRISMA-P Group. Preferred reporting items for systematic review and meta-analysis protocols (PRISMA-P) 2015 statement. Systematic Reviews 2015; 4:1. <https://doi.org/10.1186/2046-4053-4-1>

Supplement Table S4a: Trial characteristics

| Overweight/Obese Trials      |                |                              |                   |                                     |                                             |                               |                      |         |        |                   |                |                           |                                       |                           |
|------------------------------|----------------|------------------------------|-------------------|-------------------------------------|---------------------------------------------|-------------------------------|----------------------|---------|--------|-------------------|----------------|---------------------------|---------------------------------------|---------------------------|
| Study                        | Subjects       | Sample Description           | Mean Age (y) (SD) | Mean Baseline Body Weight (kg) (SD) | Mean Baseline BMI (kg/m <sup>2</sup> ) (SD) | Mean GI:GL of diet (SD) ¶ ¶ ¶ | Pasta Dose (serv/wk) | Setting | Design | Energy Balance§   | Duration (wks) | Diet Composition % (SD)§§ | Dietary Prescription                  | Funding Source            |
| Karl et al. 2015 †††         | 39 (19M:20F)** | OB, OP                       |                   |                                     |                                             |                               | 2.33                 | USA     | P      | Negative+ Neutral | 17             |                           | CR to 2/3kcal; Metabolic              | Agency                    |
| Low GI                       | 20             |                              | 56 (5)*           | 92.9 (13.6)*                        | 32.3 (3.4)*                                 | 42:133                        |                      |         |        |                   |                | 68:15:16                  |                                       |                           |
| Higher GI                    | 19             |                              | 56 (5)*           | 94 (9.7)*                           | 33.4 (2.6)*                                 | 61:201                        |                      |         |        |                   |                | 70:16:14                  |                                       |                           |
| Pereira et al. 2015          | 19 (4M:15F)**  | OW, IP/OP                    |                   |                                     |                                             |                               | NR                   | Brazil  | P      | Neutral           | 6.4            |                           | Ad libitum                            | Unknown                   |
| Low GI                       | 10             |                              | 28(5)             | 80.0(12.6)                          | 29.9 (2.1)                                  | 41.2(2.2) ¥ **                |                      |         |        |                   |                | 48.3:16.1:32.8            |                                       |                           |
| Higher GI                    | 9              |                              | 26(3)             | 79.1(12.2)                          | 29.1 (2.0)                                  | 74.1(2.9) ¥ **                |                      |         |        |                   |                | 54.6:12.7:34.4            |                                       |                           |
| Buscemi et al. 2013          | 40 (19M:21F)** | OW/OB, high CVD risk, OP     |                   |                                     |                                             |                               | NR                   | Italy   | P      | Negative          | 12             |                           | CR to 20kcal/kg/d; Ad libitum         | Unknown                   |
| Low GI                       | 19             |                              | 51 (8)            | 93.8 (17.3)                         | 34.3 (6.6)                                  | 48.1: 138                     |                      |         |        |                   |                | 56:18:26                  |                                       |                           |
| Higher GI                    | 21             |                              | 49 (8)            | 93.2 (14.4)                         | 34.5 (5.1)                                  | 59.3: 174                     |                      |         |        |                   |                | 57:16:27                  |                                       |                           |
| Costa et al. 2012            | 17 (7M:10F)    | OW, IP/OP                    | 25.4 (5.8)        | 84.1(16.3)                          | 26.3(3.2)                                   |                               | NR                   | Brazil  | C      | Neutral           | 4              |                           | Ab libitum,2 meals+3 fruit/d provided | NR                        |
| Low GI                       |                |                              |                   |                                     |                                             | 47.5(3.8)                     |                      |         |        |                   |                | 58.6:13.9:25.5            |                                       |                           |
| Higher GI                    |                |                              |                   |                                     |                                             | 61.6(2.8)                     |                      |         |        |                   |                | 55.4:14.2:30.3            |                                       |                           |
| Jebb et al. 2010 - High MUFA | 225**          | OH, some CV risk factors, OP | ~52               |                                     | ~28.5 <sup>+</sup>                          |                               | 1.75                 | UK      | P      | Neutral           | 24             |                           | Ad Libitum, key foods provided        | Agency, foods by industry |
| Low GI                       | 115            |                              |                   | 83.7 (69.6-93.1)¶¶¶                 |                                             | ~55.2                         |                      |         |        |                   |                | ~44.6:16.4:35.7****       |                                       |                           |
| Higher GI                    | 110            |                              |                   | 80.5 (70.0-92.1)¶¶¶                 |                                             | ~63.3                         |                      |         |        |                   |                | ~44.9:15.3:35.6****       |                                       |                           |
| Jebb et al. 2010 - Low Fat   | 250**          | OH, some CV risk factors, OP | ~52               |                                     | ~28.5 <sup>+</sup>                          |                               | 3.5                  | UK      | P      | Neutral           | 24             |                           | Ad Libitum, key foods provided        | Agency, foods by industry |
| Low GI                       | 117            |                              |                   | 79.4 (70.1- 91.8)¶¶¶                |                                             | ~56.3                         |                      |         |        |                   |                | ~51.5:14.2:26.1****       |                                       |                           |
| Higher GI                    | 111            |                              |                   | 80.7 (71.4- 91.4)¶¶¶                |                                             | ~64.4                         |                      |         |        |                   |                | ~51.1:15.7:27.5****       |                                       |                           |
| Larsen et al. 2010-High Pro  | 231**          | OW/OB, OP                    |                   |                                     | NR                                          |                               | NR                   | Europe  | P      | Neutral           | 26             |                           | Ad libitum                            | Agency                    |
| Low GI                       | 124            |                              | 42.1 (6.5)        | 88.5 (15.6)                         |                                             | ~56.5: 108.9                  |                      |         |        |                   |                | ~43:22:32                 |                                       |                           |
| Higher GI                    | 107            |                              | 42 (5.7)          | 89.5 (17.1)                         |                                             | ~61.4: 113.1                  |                      |         |        |                   |                | ~45:23:31                 |                                       |                           |
| Larsen et al. 2010 - Low Pro | 203 **         | OW/OB, OP                    |                   |                                     | NR                                          |                               | NR                   | Europe  | P      | Neutral           | 26             |                           | Ad libitum                            | Agency                    |
| Low GI                       | 106            |                              | 42.2 (5.7)        | 88.4 (15.7)                         |                                             | ~56.2: 121                    |                      |         |        |                   |                | ~51:18:30                 |                                       |                           |
| Higher GI                    | 97             |                              | 42 (5.9)          | 86.6 (13.8)                         |                                             | ~61.6: 137.9                  |                      |         |        |                   |                | ~51:17:31                 |                                       |                           |

Supplement Table S4b: Trial characteristics continued

| Overweight/Obese Trials continued |               |                         |                   |                                     |                                             |                                          |                      |         |        |                            |                |                                                     |                                           |                  |  |
|-----------------------------------|---------------|-------------------------|-------------------|-------------------------------------|---------------------------------------------|------------------------------------------|----------------------|---------|--------|----------------------------|----------------|-----------------------------------------------------|-------------------------------------------|------------------|--|
| Study                             | Subjects      | Sample Description      | Mean Age (y) (SD) | Mean Baseline Body Weight (kg) (SD) | Mean Baseline BMI (kg/m <sup>2</sup> ) (SD) | Mean GI:GL of diet (SD) ¶ ¶ ¶            | Pasta Dose (serv/wk) | Setting | Design | Energy Balance§            | Duration (wks) | Diet Composition % (SD)§§                           | Dietary Prescription                      | Funding Source   |  |
| Solomon et al. 2010               | 22 (8M:14F)** | OB, Pre-T2DM, OP        |                   |                                     |                                             |                                          | 7                    | USA     | P      | Neutral                    | 12             |                                                     | Metabolic plus exercise program           | Agency           |  |
| Low GI                            | 10 (3M:7F)    |                         | 67 (6)            | 97.4 (12.0)                         | 34.9 (1.1)                                  | 39.8 (0.9)                               |                      |         |        |                            |                | 54.7(0.3):28.3(0.3):17.0(0.3)                       |                                           |                  |  |
| Higher GI                         | 12 (5M:7F)    |                         | 64 (3)            | 94.7 (15.2)                         | 34.1 (1.1)                                  | 80.0 (2.1)                               |                      |         |        |                            |                | 55.6(0.7):27.8(0.7):16.6(0.3)                       |                                           |                  |  |
| Philippou et al. 2009- 6 mo       | 38**          | ≥1 CHD risk factors, OP | (35-65) ¶         |                                     |                                             |                                          | NR                   | UK      | P      | Negative (for all but n=2) | 24             |                                                     | 500kcal CR; Ad libitum                    | Agency           |  |
| Low GI                            | 22            |                         |                   | 91.3(14.8)***                       | 29.1 (3.6)***                               | 50.6 (4.6):<br>114.4(31.5)               |                      |         |        |                            |                |                                                     |                                           |                  |  |
| Higher GI                         | 16            |                         |                   | 97.5(16.4)***                       | 30.5 (3.5)***                               | 63.2(5.6):<br>175.0(45.6)                |                      |         |        |                            |                |                                                     |                                           |                  |  |
| Philippou et al. 2009- 4 mo       | 42**          | OW, OP                  | (18-65)¶          |                                     |                                             |                                          | NR                   | UK      | P      | Neutral                    | 16             |                                                     | Ad libitum                                | Unknown          |  |
| Low GI                            | 23            |                         |                   | 87.2 (15.3)                         | 32.5 (4.8)                                  | 49.7(5.7):89.7(27.5)                     |                      |         |        |                            |                | 47.6(6.7):19.5(4.2):31.8(5.8)                       |                                           |                  |  |
| Higher GI                         | 19            |                         |                   | 83.6 (13.4)                         | 31.3 (4.8)                                  | 63.7(9.4):136.8(56.3)                    |                      |         |        |                            |                | 48.9(7):19.3(4.9):30.9(9)                           |                                           |                  |  |
| Abete et al. 2008                 | 32 (18M:14F)  | OB, OP                  | 36(7)             |                                     |                                             |                                          | 2.33                 | Spain   | P      | Negative                   | 8              |                                                     | 30% CR; Ad libitum, 3-day menus           | Agency           |  |
| Low GI                            | 16            |                         |                   | 94.3(16.1)                          | 32.8 (4.3)                                  | (40-45)¶                                 |                      |         |        |                            |                | 50.2 (1.8):18.3(1.6):31.5(1.6)                      |                                           |                  |  |
| Higher GI                         | 16            |                         |                   | 94.4(13.1)                          | 32.2 (4.4)                                  | (60-65)¶                                 |                      |         |        |                            |                | 47.8(6.8):19.6(5.6):32.6(4.3)                       |                                           |                  |  |
| Aston et al. 2008                 | 19 (0M:19F)** | OW/OB, OP               | 51.9(7.6)         | 87.5 (15)                           | 33.1 (4.9)                                  |                                          | 3.33                 | UK      | C      | Neutral                    | 12             |                                                     | Ad libitum, key CHO foods provided        | Agency           |  |
| Low GI                            |               |                         |                   |                                     |                                             | 55.5(3.8):<br>133.8(22.9)*****           |                      |         |        |                            |                | 51.4(6.0):17.0(2.4):32.2(5.1)*<br>***               |                                           |                  |  |
| Higher GI                         |               |                         |                   |                                     |                                             | 63.9(3):<br>138.8(30.5)*****             |                      |         |        |                            |                | 47.6(6.1):17.6(3.3):34.1(5.7)*<br>***               |                                           |                  |  |
| Jensen et al. 2008                | 44 (0M:44F)** | OW, OP                  | (20-40)¶          |                                     |                                             |                                          | 3                    | Denmark | P      | Neutral                    | 10             |                                                     | Ad libitum, partial provision, menu plans | Agency, Industry |  |
| Low GI                            | 22 (0M:22F)   |                         |                   | 77.9(6.9)                           | 27.4 (1.5)                                  | 72¥                                      |                      |         |        |                            |                | ~57(5):17(0):23(5) ‡                                |                                           |                  |  |
| Higher GI                         | 22 (0M:22F)   |                         |                   | 80.2(1.4)                           | 27.6 (0.3)                                  | 95¥                                      |                      |         |        |                            |                | ~57(5):17(0):22(5) ‡                                |                                           |                  |  |
| Philippou et al. 2008             | 13 (5M:8F)**  | ≥1 CHD risk factors, OP |                   |                                     |                                             |                                          | NR                   | UK      | P      | Negative                   | 12             |                                                     | 500kcal CR; Ad libitum                    | Agency           |  |
| Low GI                            | 7 (3M:4F)     |                         | 54 (49-58)¶¶      | 81.5 (4.7)***                       | 28.7 (2.1)***                               | 51.3(51.0-52.0):<br>105.6 (76.9-110.1)¶¶ |                      |         |        |                            |                | 46.0(37.8-51.0): 17.1(15.7-17.4): 32.8(31.3-37.1)¶¶ |                                           |                  |  |
| Higher GI                         | 6 (2M:4F)     |                         | 45 (39-50)¶¶      | 89.7 (12.8)***                      | 31.5 (4.4)***                               | 59.3(59.2-64.0):<br>114.7(98.5-134.9)¶¶  |                      |         |        |                            |                | 49.4(47.8-51.7):19.6(14.0-23.1):29.2(25.2-34.5)¶¶   |                                           |                  |  |

Supplement Table S4c: Trial characteristics continued

| Overweight/Obese Trials continued        |                 |                    |                   |                                     |                                             |                               |                      |           |        |                 |                |                                  |                                                      |                  |
|------------------------------------------|-----------------|--------------------|-------------------|-------------------------------------|---------------------------------------------|-------------------------------|----------------------|-----------|--------|-----------------|----------------|----------------------------------|------------------------------------------------------|------------------|
| Study                                    | Subjects        | Sample Description | Mean Age (y) (SD) | Mean Baseline Body Weight (kg) (SD) | Mean Baseline BMI (kg/m <sup>2</sup> ) (SD) | Mean GI:GL of diet (SD) ¶ ¶ ¶ | Pasta Dose (serv/wk) | Setting   | Design | Energy Balance§ | Duration (wks) | Diet Composition % (SD)§§        | Dietary Prescription                                 | Funding Source   |
| Bellisile et al. 2007                    | 65 (0M:65F)**   | OW/OB, OP          |                   |                                     |                                             |                               | NR                   | France    | P      | Neutral         | 12             |                                  | Ad libitum                                           | Industry         |
| Low GI                                   | 35              |                    | 46.1 (13.6)       | 80 (13.2)                           | 30.2 (4.1)                                  | na                            |                      |           |        |                 |                |                                  |                                                      |                  |
| Higher GI                                | 30              |                    | 45.3 (12.0)       | 79 (13.1)                           | 30.4 (4.4)                                  | na                            |                      |           |        |                 |                |                                  |                                                      |                  |
| de Rougemont et al. 2007                 | 38 (22M:16F)**  | OW, OP             |                   |                                     |                                             |                               | 2.8                  | France    | P      | Neutral         | 5              |                                  | Ad libitum, some foods provided                      | Agency, Industry |
| Low GI                                   | 19              |                    | 36.3 (8.7)        | 77.2 (9.6)                          | 27.5 (1.3)                                  | 46.5 (1.3)                    |                      |           |        |                 |                | 42.6 (3.9):19.8 (1.7):37.7 (4.4) |                                                      |                  |
| Higher GI                                | 19              |                    | 40.4 (9.6)        | 77.3 (9.2)                          | 27.2 (1.3)                                  | 66.3 (2.6)                    |                      |           |        |                 |                | 44.1 (3.5):17.6 (1.7):38.4 (3.1) |                                                      |                  |
| Sichieri et al. 2007                     | 123 (0M:123F)** | OW, OP             |                   |                                     |                                             |                               | NR                   | Brazil    | P      | Negative        | 72             |                                  | 100-300kcal CR; 6-d menu and exchange lists provided | Agency           |
| Low GI                                   | 63              |                    | 37.2 (5.4)*       | 67.7 (6.6)*                         | na                                          | 21(38): 74(84)                |                      |           |        |                 |                | 59.5 (6.3): 13.3: 27.2(4.6)      |                                                      |                  |
| Higher GI                                | 60              |                    | 37.5 (5.6)*       | 68.5 (7.5)*                         | na                                          | 51(28): 199(43)               |                      |           |        |                 |                | 61.6 (6.2): 12.3: 26.1(4.7)      |                                                      |                  |
| McMillian-Price et al. 2006-High Carb    | 64(16M:48F)     | OW/OB, OP          |                   |                                     |                                             |                               | NR                   | Australia | P      | Negative        | 12             |                                  | Ad libitum, key foods and meals provided             | Agency-Industry  |
| Low GI                                   | 32              |                    | 30.5 (7.9)        | 87.1 (15.3)                         | 30.6 (4.5)                                  | 45 (6):89 (28)                |                      |           |        |                 |                | 56 (6):19 (0):22 (6)             |                                                      |                  |
| Higher GI                                | 32              |                    | 31.8 (9.6)        | 86 (10.7)                           | 30.9 (3.4)                                  | 70 (6):129 (45)               |                      |           |        |                 |                | 60 (6):18 (6):19 (6)             |                                                      |                  |
| McMillian-Price et al. 2006-High Protein | 65(15M:50F)     | OW/OB, OP          |                   |                                     |                                             |                               | NR                   | Australia | P      | Negative        | 12             |                                  | Ad libitum, key foods and meals provided             | Agency-Industry  |
| Low GI                                   | 33              |                    | 34.6 (8.6)        | 88.4 (17.2)                         | 32.1 (5.2)                                  | 44 (6):59 (23)                |                      |           |        |                 |                | 40 (11):26 (6):28 (6)            |                                                      |                  |
| Higher GI                                | 32              |                    | 30.2 (8.5)        | 87.7 (16.4)                         | 31.3 (4.5)                                  | 59 (6):75 (17)                |                      |           |        |                 |                | 42 (6):28 (6):27 (6)             |                                                      |                  |
| Wolever et al. 2002                      | 24 (5M:19F)**   | IGT, OP            |                   |                                     |                                             |                               | NR                   | Canada    | P      | Neutral         | 16             |                                  | Ad libitum, partial provision                        | Agency           |
| Low GI                                   | 13(3M:10F)      |                    | 55.2 (10.8)       | 79.7 (13.1)***                      | 29.7 (4.3)                                  | 54.4 (2.5):91.8 (9.4)         |                      |           |        |                 |                | 54.8 (6.1):19.4 (1.8):24.7 (5.8) |                                                      |                  |
| Higher GI                                | 11(2M:9F)       |                    | 58.8 (13.3)       | 76.4 (20.4)***                      | 29.3 (7.3)                                  | 59.3 (2.0):96.8 (11.6)        |                      |           |        |                 |                | 52.8 (6.6):17.4 (2.3):27.9 (6.3) |                                                      |                  |

Supplement Table S4d: Trial characteristics continued

| Diabetes Trials     |                |                    |                   |                                     |                                             |                               |                      |         |                |                 |                |                                  |                      |                                                         |
|---------------------|----------------|--------------------|-------------------|-------------------------------------|---------------------------------------------|-------------------------------|----------------------|---------|----------------|-----------------|----------------|----------------------------------|----------------------|---------------------------------------------------------|
| Study               | Subjects       | Sample Description | Mean Age (y) (SD) | Mean Baseline Body Weight (kg) (SD) | Mean Baseline BMI (kg/m <sup>2</sup> ) (SD) | Mean GI:GL of diet (SD) ¶ ¶ ¶ | Pasta Dose (serv/wk) | Setting | Design         | Energy Balance§ | Duration (wks) | Diet Composition % (SD)§§        | Dietary Prescription | Funding Source                                          |
| Jenkins et al. 2014 | 141(77M:64F)   | T2DM, OP           |                   |                                     |                                             |                               |                      | NR      | Canada         | P               | Neutral        | 12                               |                      | Ad libitum, bread supplement<br>Industry Association    |
| Low GI              | 70 (38M:32F)   |                    | 59 (10)           | 85 (20)                             | 30 (5)                                      | ~51:53                        |                      |         |                |                 |                | ~38.5:19.8:37.2                  |                      |                                                         |
| Higher GI           | 71 (39M:32F)   |                    | 59 (10)           | 84 (19)                             | 31 (6)                                      | ~62:89                        |                      |         |                |                 |                | ~49.2:19.8:27.4                  |                      |                                                         |
| Visek et al. 2014   | 20 (12M:8F)    | T2DM, OP           | 62.7 (5.8)        | 91.9 (14.1)                         | 32 (4.2)                                    |                               |                      | NR      | Czech Republic | C               | Neutral        | 12                               |                      | Ad libitum<br>Agency                                    |
| Low GI              |                |                    |                   |                                     |                                             | 49 (48-51)¶¶¶                 |                      |         |                |                 |                | ~37.2:18.0:36.0                  |                      |                                                         |
| Higher GI           |                |                    |                   |                                     |                                             | 68 (61-72)¶¶¶                 |                      |         |                |                 |                | ~36.2:17.3:40.0                  |                      |                                                         |
| Jenkins et al. 2012 | 121 (61M: 60F) | T2DM, OP           |                   |                                     |                                             |                               |                      | NR      | Canada         | P               | Neutral        | 12                               |                      | Ad libitum<br>Agency                                    |
| Low GI              | 60             |                    | 58 (10.1)         | 85.6 (20.1)                         | 31.4 (7.0)                                  | 47: 80                        |                      |         |                |                 |                | 45.4:22.8:30.5                   |                      |                                                         |
| Higher GI           | 61             |                    | 61 (7.8)          | 82.5 (17.2)                         | 29.9 (5.5)                                  | 58: 100                       |                      |         |                |                 |                | 48.3:21.4:28.5                   |                      |                                                         |
| Yusof et al. 2009   | 100**          | T2DM, OP           | NR                |                                     |                                             |                               |                      | NR      | Malaysia       | P               | Neutral        | 12                               |                      | Ad libitum, key foods provided to lowGI group<br>Agency |
| Low GI              | 51             |                    |                   | 69.12 (13.33)                       | 27.05 (4.91)                                | 57(6): 108(32)                |                      |         |                |                 |                | 52(4):18(3):30(4)                |                      |                                                         |
| Higher GI           | 49             |                    |                   | 66.83 (11.50)                       | 26.79 (4.65)                                | 64(5): 131(30)                |                      |         |                |                 |                | 54(4):17(3):28(5)                |                      |                                                         |
| Jenkins et al 2008  | 210 (125M:82F) | T2DM, OP           |                   |                                     |                                             |                               |                      | NR      | Canada         | P               | Neutral        | 24                               |                      | Ad libitum<br>Agency                                    |
| Low GI              | 106 (65M:41F)  |                    | 60 (10)           | 87.0 (20.0)                         | 30.6 (6.0)                                  | 49.4: 91.5                    |                      |         |                |                 |                | 44.0:21.2:33.3                   |                      |                                                         |
| Higher GI           | 104 (63M:41F)  |                    | 61 (9)            | 87.8 (19.4)                         | 31.2 (5.8)                                  | 59.3: 117.9                   |                      |         |                |                 |                | 47.5:20.7:30.5                   |                      |                                                         |
| Wolever et al. 2008 | 103            | T2DM, OW/OB, OP    |                   |                                     |                                             |                               |                      | NR      | Canada         | P               | Neutral        | 52                               |                      | Ad libitum, key foods provided<br>Agency                |
| Low GI              | 55             |                    | 60.6 (7.5)*       | 81.1 (18.7)*                        | 31.6 (4.5)*                                 | 55.1 (3.0): 133 (14.8)        |                      |         |                |                 |                | 51.9 (6.7):20.6(3.0):26.5 (5.9)  |                      |                                                         |
| Higher GI           | 48             |                    | 60.4 (7.9)*       | 84.4(18.0)*                         | 30.1 (4.3)*                                 | 63.2 (2.8): 135 (20.8)        |                      |         |                |                 |                | 46.5 (6.2):20.4 (2.8):30.8 (4.8) |                      |                                                         |



Supplement Table S4e: Trial characteristics continued

| Diabetes Trials continued |                |                    |                   |                                     |                                             |                             |                      |         |           |                 |                |                                  |                      |                                                |                  |
|---------------------------|----------------|--------------------|-------------------|-------------------------------------|---------------------------------------------|-----------------------------|----------------------|---------|-----------|-----------------|----------------|----------------------------------|----------------------|------------------------------------------------|------------------|
| Study                     | Subjects       | Sample Description | Mean Age (y) (SD) | Mean Baseline Body Weight (kg) (SD) | Mean Baseline BMI (kg/m <sup>2</sup> ) (SD) | Mean GI:GL of diet (SD) ¶¶¶ | Pasta Dose (serv/wk) | Setting | Design    | Energy Balance§ | Duration (wks) | Diet Composition % (SD)§§        | Dietary Prescription | Funding Source                                 |                  |
| Jimenez-Cruz et al. 2003  | 14 (6M:8F)**   | T2DM, OP           | 59 (34)           |                                     |                                             |                             |                      | NR      | Mexico    | C               | Neutral        | 6                                | 60:21:23             | Ad libitum                                     | Industry         |
| Low GI                    |                |                    |                   | 91.6 (24.3)                         | 32.4 (6.0)                                  | 44(3.4): 86(19.8)           |                      |         |           |                 |                |                                  |                      |                                                |                  |
| Higher GI                 |                |                    |                   | 92.6 (25.4)                         | 32.3 (6.0)                                  | 56(4.9): 139(27.3)          |                      |         |           |                 |                | 64:18:20                         |                      |                                                |                  |
| Heilbronn et al. 2002     | 45 (23M:22F)** | T2DM, OW, OP       |                   |                                     |                                             |                             |                      | 3.5     | Australia | P               | Negative       | 8                                |                      | CR to1500kcal/d; Ad libitum, partial provision | Unknown          |
| Low GI                    | 24 (11M:13F)   |                    | 56.0(9.4)         | 91.7(16.2)                          |                                             | 43                          |                      |         |           |                 |                | 58.9 (2.9):22.2 (1.5):17.9 (3.9) |                      |                                                |                  |
| Higher GI                 | 21 (12M:9F)    |                    | 57.5(9.6)         | 93.2 (13.3)                         |                                             | 75                          |                      |         |           |                 |                | 60.8 (2.3):21.7 (0.9):17.1 (2.3) |                      |                                                |                  |
| Fontvieille et al. 1992   | 18 (12M:6F)    | T1DM/T2DM, OP      | 47.2(11.6)        |                                     | 24.8(2.6)                                   |                             |                      | 4.7     | France    | C               | Neutral        | 5                                |                      | Ad libitum                                     | Agency, Industry |
| Low GI                    |                |                    |                   |                                     |                                             | 38.1(5.3)                   |                      |         |           |                 |                | 45.8(7.2):18.0(2.5):36.2(6.8)    |                      |                                                |                  |
| Higher GI                 |                |                    |                   |                                     |                                             | 64.2(3.1)                   |                      |         |           |                 |                | 44.9(7.3):18.8(1.6):36.3(6.0)    |                      |                                                |                  |
| Fontvieille et al. 1988   | 8 (4M:4F)      | T1DM, OP           | 43.5 (9.9)        |                                     | 24.1 (6.8)                                  |                             |                      | 3.5     | France    | C               | Neutral        | 3                                |                      | Ad libitum, partial provision                  | Agency, Industry |
| Low GI                    |                |                    |                   |                                     |                                             | 46.5(2.5)                   |                      |         |           |                 |                | 46.1 (4.5):17.4 (1.4):35.0 (2.8) |                      |                                                |                  |
| Higher GI                 |                |                    |                   |                                     |                                             | 60.1 (5.1)                  |                      |         |           |                 |                | 45.4 (4.5):16.9 (1.7):36.0 (2.8) |                      |                                                |                  |
| <b>CHD Trial</b>          |                |                    |                   |                                     |                                             |                             |                      |         |           |                 |                |                                  |                      |                                                |                  |
| Frost et al. 2004         | 55 (48M:7F)**  | CHD, OP            |                   |                                     |                                             |                             |                      | NR      | UK        | P               | Neutral §§§    | 12                               |                      | Ad Libitum                                     | Unknown          |
| Low GI                    | 26 (23M:3F)    |                    | 63.6 (9.4)        | 81.2 (12.2)                         | 26.9 (3.3)                                  | 50(4):115(39)               |                      |         |           |                 |                | 49 (5):18 (5):31 (5)             |                      |                                                |                  |
| Higher GI                 | 29 (25M:4F)    |                    | 61.8 (9)          | 81.7 (16.7)                         | 28.7 (4.6)                                  | 57(4):106(34)               |                      |         |           |                 |                | 47 (10):18 (5):32 (10)           |                      |                                                |                  |

Abbreviations: BMI=Body Mass Index; C=Crossover design; Carb=Carbohydrate; CED= carbohydrate exchange diet; CHD= Coronary Heart Disease; CR= calorie restriction; CV=cardiovascular; GI= glycemic index; GL=glycemic load; IGT= impaired glucose tolerance; IP=inpatient; IR= insulin resistant; High Carb= high carbohydrate; HI= hyperinsulinemic; M = male; mo=months; MUFA=monounsaturated fatty acids; na=not available; T1DM=type 1 diabetes mellitus; T2DM = type 2 diabetes mellitus; OB= obese; OH=otherwise healthy; OP = outpatient; OW= overweight; P=Parallel design; SD= standard deviation; F = female; UK= United Kingdom; USA= United States of America; wks=weeks; y= years

§Negative energy balance diets were designed for weight loss, Neutral energy balance diets for weight maintenance, where all diets are isocaloric between test and control groups; §§Energy from carbohydrate: protein: fat for the planned diet or if not planned; §§§ Participants were advised to lose weight if they had a BMI>28kg/m2.

¶ Range of values; ¶¶ median and interquartile range (IQR); ¶¶¶ Actual GI/GL or if not available, planned;

\* Calculated before dropout; \*\*Completer Analysis, as used in data analysis; \*\*\* completer analysis, data obtained from authors; \*\*\*\* based on less participants than in analysis;

+ approximate based on all study arms; ¥ approximate based on test meals; ‡ approximate based on n=45 from Sloth et al. 2004, the original publication of this study;

‡‡‡ analysis includes weight loss and weight maintenance phases

**Supplemental Table S5: Sensitivity analysis of the systematic removal of each trial\***

|                              | MD [95% CI], P-value<br>I <sup>2</sup> , P-value |                                                  |                                                |                                               |                                                 |                                                 |
|------------------------------|--------------------------------------------------|--------------------------------------------------|------------------------------------------------|-----------------------------------------------|-------------------------------------------------|-------------------------------------------------|
|                              | Body Weight (kg)<br>N=32                         | BMI (kg/m <sup>2</sup> )<br>N=18                 | Body Fat (%)<br>N=10                           | Waist Circumference (cm)<br>N=18              | Waist-to-hip Ratio<br>N=6                       | Sagittal Abdominal Diameter (cm)<br>N=3         |
| All studies                  | -0.63 [-0.84, -0.42],<br>P<0.01<br>0.00%, P=0.51 | -0.26 [-0.36, -0.16],<br>P<0.01<br>0.00%, P=0.91 | -0.01 [-0.58, 0.56],<br>P=0.98<br>65%, P=0.003 | -0.46 [-1.05, 0.14],<br>P=0.13<br>62%, P<0.01 | -0.00 [-0.01, 0.00],<br>P=0.27<br>0.00%, P=0.52 | -0.09 [-0.34, 0.16],<br>P=0.48<br>0.00%, P=0.92 |
| <b>Removal of:</b>           |                                                  |                                                  |                                                |                                               |                                                 |                                                 |
| OW/OB                        |                                                  |                                                  |                                                |                                               |                                                 |                                                 |
| Pereira et al. 2015          | -0.61 [-0.82, -0.39],<br>P<0.01<br>0.00%, P=0.54 | -0.24 [-0.34, -0.14],<br>P<0.01<br>0.00%, P=0.93 | 0.19 [-0.25, 0.63],<br>P=0.39<br>36%, P=0.13   | -0.37 [-1.04, 0.31],<br>P=0.28<br>62%, P<0.01 | -0.00 [-0.01, 0.01],<br>P=0.67<br>0.00%, P=0.58 | n/a                                             |
| Karl et al. 2015             | -0.62 [-0.83, -0.41],<br>P<0.01<br>0.00%, P=0.50 | -0.25 [-0.35, -0.16],<br>P<0.01<br>0.00%, P=0.91 | 0.10 [-0.51, 0.71],<br>P=0.74<br>64%, P<0.01   | n/a                                           | n/a                                             | n/a                                             |
| Buscemi et al. 2013          | -0.63 [-0.84, -0.42],<br>P<0.01<br>0.00%, P=0.46 | -0.26 [-0.36, -0.16],<br>P<0.01<br>0.00%, P=0.86 | -0.08 [-0.63, 0.48],<br>P=0.79<br>64%, P<0.01  | -0.46 [-1.06, 0.15],<br>P=0.14<br>64%, P<0.01 | n/a                                             | n/a                                             |
| Costa et al. 2012            | -0.62 [-0.84, -0.41],<br>P<0.01<br>0.00%, P=0.46 | -0.26 [-0.37, -0.16],<br>P<0.01<br>0.00%, P=0.86 | -0.06 [-0.73, 0.61],<br>P=0.86<br>66%, P<0.01  | -0.33 [-0.94, 0.28],<br>P=0.29<br>59%, P<0.01 | n/a                                             | n/a                                             |
| Jebb et al. 2010 - LowFat    | -0.63 [-0.84, -0.42],<br>P<0.01<br>0.00%, P=0.46 | n/a                                              | n/a                                            | n/a                                           | n/a                                             | n/a                                             |
| Larsen et al. 2010 - LowPro  | -0.60 [-0.81, -0.38],<br>P<0.01<br>0.00%, P=0.57 | n/a                                              | n/a                                            | -0.45 [-1.09, 0.18],<br>P=0.16<br>64%, P<0.01 | n/a                                             | -0.05 [-0.39, 0.29],<br>P=0.79<br>0.00%, P=0.86 |
| Jebb et al. 2010- HighMUFA   | -0.64 [-0.85, -0.43],<br>P<0.01<br>0.00%, P=0.65 | n/a                                              | n/a                                            | n/a                                           | n/a                                             | n/a                                             |
| Larsen et al. 2010 - HighPro | -0.62 [-0.83, -0.41],<br>P<0.01<br>0.00%, P=0.48 | n/a                                              | n/a                                            | -0.37 [-1.00, 0.26],<br>P=0.26<br>62%, P<0.01 | n/a                                             | -0.13 [-0.45, 0.19],<br>P=0.42<br>0.00%, P=0.92 |
| Solomon et al. 2010          | -0.63 [-0.84, -0.42],<br>P<0.01                  | -0.26 [-0.36, -0.16],<br>P<0.01                  | n/a                                            | n/a                                           | n/a                                             | n/a                                             |

|                                      |                                                  |                                                  |                                               |                                                            |                                                 |                                                 |
|--------------------------------------|--------------------------------------------------|--------------------------------------------------|-----------------------------------------------|------------------------------------------------------------|-------------------------------------------------|-------------------------------------------------|
|                                      | 0.00%, P=0.47                                    | 0.00%, P=0.88                                    |                                               |                                                            |                                                 |                                                 |
| Philippou et al. 2009 - 6mnth        | -0.65 [-0.86, -0.44],<br>P<0.01<br>0.00%, P=0.59 | -0.28 [-0.37, -0.18],<br>P<0.01<br>0.00%, P=0.97 | -0.12 [-0.71, 0.48],<br>P=0.70<br>65%, P<0.01 | -0.55 [-1.15, 0.04],<br>P=0.07<br>61%, P<0.01              | n/a                                             | n/a                                             |
| Philippou et al. 2009 - 4mnth        | -0.61 [-0.83, -0.40],<br>P<0.01<br>0.00%, P=0.48 | -0.25 [-0.35, -0.15],<br>P<0.01<br>0.00%, P=0.89 | -0.09 [-0.72, 0.54],<br>P=0.78<br>66%, P<0.01 | -0.44 [-1.08, 0.19],<br>P=0.17<br>64%, P<0.01              | n/a                                             | n/a                                             |
| Abete et al. 2008                    | -0.63 [-0.84, -0.42],<br>P<0.01<br>0.00%, P=0.47 | n/a                                              | n/a                                           | n/a                                                        | n/a                                             | n/a                                             |
| Philippou et al. 2008                | -0.62 [-0.83, -0.42],<br>P<0.01<br>0.00%, P=0.48 | -0.26 [-0.35, -0.16],<br>P<0.01<br>0.00%, P=0.89 | -0.06 [-0.68, 0.55],<br>P=0.84<br>68%, P<0.01 | -0.41 [-1.02, 0.19],<br>P=0.18<br>63%, P<0.01              | n/a                                             | n/a                                             |
| Aston et al. 2008                    | -0.66 [-0.87, -0.44],<br>P<0.01<br>0.00%, P=0.52 | n/a                                              | -0.00 [-0.70, 0.69],<br>P=0.99<br>68%, P<0.01 | -0.54 [-1.14, 0.07],<br>P=0.08<br>62%, P<0.01              | n/a                                             | n/a                                             |
| Jensen et al. 2008                   | -0.63 [-0.84, -0.42],<br>P<0.01<br>0.00%, P=0.46 | -0.27 [-0.36, -0.17],<br>P<0.01<br>0.00%, P=0.88 | n/a                                           | -0.44 [-1.05, 0.18],<br>P=0.16<br>64%, P<0.01              | -0.00 [-0.01, 0.00],<br>P=0.24<br>0.00%, P=0.41 | -0.09 [-0.35, 0.18],<br>P=0.51<br>0.00%, P=0.69 |
| de Rougemont et al. 2007             | -0.57 [-0.80, -0.34],<br>P<0.01<br>0.00%, P=0.53 | -0.25 [-0.36, -0.14],<br>P<0.01<br>0.00%, P=0.87 | 0.06 [-0.57, 0.70],<br>P=0.84<br>67%, P<0.01  | n/a                                                        | n/a                                             | n/a                                             |
| Sichieri et al. 2007                 | -0.66 [-0.88, -0.45],<br>P<0.01<br>0.00%, P=0.53 | n/a                                              | n/a                                           | n/a                                                        | n/a                                             | n/a                                             |
| Bellisle et al. 2007                 | -0.63 [-0.84, -0.42],<br>P<0.01<br>0.00%, P=0.47 | -0.26 [-0.36, -0.16],<br>P<0.01<br>0.00%, P=0.88 | n/a                                           | -0.47 [-1.08, 0.13],<br>P=0.13<br>64%, P<0.01              | -0.00 [-0.01, 0.00],<br>P=0.14<br>0.00%, P=0.70 | n/a                                             |
| McMillan-Price et al. 2006 - HighCHO | -0.61 [-0.82, -0.39],<br>P<0.01<br>0.00%, P=0.51 | n/a                                              | n/a                                           | -0.38 [-1.01, 0.25],<br>P=0.23<br>63%, P<0.01              | n/a                                             | n/a                                             |
| McMillan-Price et al. 2006 - HighPro | -0.70 [-0.91, -0.49],<br>P<0.01<br>0.00%, P=0.91 | n/a                                              | n/a                                           | <b>-0.62 [-1.19, -0.05],<br/>P=0.03<br/>55%, P&lt;0.01</b> | n/a                                             | n/a                                             |
| Wolever et al. 2002                  | -0.63 [-0.84, -0.42],<br>P<0.01<br>0.00%, P=0.46 | n/a                                              | n/a                                           | n/a                                                        | n/a                                             | n/a                                             |
| <b>Diabetes:</b>                     |                                                  |                                                  |                                               |                                                            |                                                 |                                                 |
| Vissek et al. 2014                   | -0.63 [-0.84, -0.42],<br>P<0.01                  | -0.26 [-0.36, -0.16],<br>P<0.01                  | 0.01 [-0.57, 0.60],<br>P=0.96                 | n/a                                                        | n/a                                             | n/a                                             |

|                          |                                                  |                                                  |             |                                                         |                                                 |     |
|--------------------------|--------------------------------------------------|--------------------------------------------------|-------------|---------------------------------------------------------|-------------------------------------------------|-----|
|                          | 0.00%, P=0.46                                    | 0.00%, P=0.86                                    | 68%, P<0.01 |                                                         |                                                 |     |
| Jenkins et al. 2014      | -0.66 [-0.88, -0.43],<br>P<0.01<br>0.00%, P=0.47 | -0.29 [-0.39, -0.18],<br>P<0.01<br>0.00%, P=0.94 | n/a         | <b>-0.61 [-1.18, -0.04],<br/>P=0.04<br/>50%, P=0.01</b> | -0.00 [-0.01, 0.00],<br>P=0.21<br>0.00%, P=0.43 | n/a |
| Jenkins et al. 2012      | -0.62 [-0.84, -0.40],<br>P<0.01<br>0.00%, P=0.46 | -0.25 [-0.35, -0.15],<br>P<0.01<br>0.00%, P=0.87 | n/a         | -0.44 [-1.05, 0.17],<br>P=0.16<br>64%, P<0.01           | -0.00 [-0.01, 0.01],<br>P=0.64<br>0.00%, P=0.53 | n/a |
| Yusof et al. 2009        | -0.63 [-0.84, -0.42],<br>P<0.01<br>0.00%, P=0.46 | -0.26 [-0.36, -0.16],<br>P<0.01<br>0.00%, P=0.87 | n/a         | -0.33 [-0.95, 0.28],<br>P=0.29<br>58%, P<0.01           | n/a                                             | n/a |
| Jenkins et al. 2008      | -0.61 [-0.83, -0.40],<br>P<0.01<br>0.00%, P=0.48 | -0.25 [-0.36, -0.15],<br>P<0.01<br>0.00%, P=0.87 | n/a         | n/a                                                     | n/a                                             | n/a |
| Wolever et al. 2008      | -0.64 [-0.84, -0.43],<br>P<0.01<br>0.00%, P=0.57 | n/a                                              | n/a         | -0.50 [-1.10, 0.09],<br>P=0.10<br>62%, P<0.01           | n/a                                             | n/a |
| Jimenez-Cruz et al. 2003 | -0.63 [-0.84, -0.42],<br>P<0.01<br>0.00%, P=0.46 | -0.26 [-0.35, -0.16],<br>P<0.01<br>0.00%, P=0.86 | n/a         | n/a                                                     | n/a                                             | n/a |
| Heilbronn et al. 2002    | -0.63 [-0.84, -0.42],<br>P<0.01<br>0.00%, P=0.47 | n/a                                              | n/a         | n/a                                                     | n/a                                             | n/a |
| Fontvieille et al. 1992  | -0.63 [-0.84, -0.42],<br>P<0.01<br>0.00%, P=0.46 | n/a                                              | n/a         | n/a                                                     | n/a                                             | n/a |
| Fontvieille et al. 1988  | -0.63 [-0.84, -0.42],<br>P<0.01<br>0.00%, P=0.46 | n/a                                              | n/a         | n/a                                                     | n/a                                             | n/a |
| <b>CHD</b>               |                                                  |                                                  |             |                                                         |                                                 |     |
| Frost et al. 2004        | -0.63 [-0.84, -0.42],<br>P<0.01<br>0.00%, P=0.47 | -0.26 [-0.36, -0.17],<br>P<0.01<br>0.00%, P=0.89 | n/a         | -0.48 [-1.09, 0.12],<br>P=0.12<br>63%, P<0.01           | -0.00 [-0.01, 0.00],<br>P=0.25<br>1%, P=0.40    | n/a |

\*Sensitivity analysis included the removal of each single study from the meta-analyses one at a time and the summary effect was recalculated. An influential outlier was considered a study whose removal changed the magnitude of the pooled effect by >10%.

BMI, body mass index; CHD, coronary heart disease; CHO, carbohydrate; CI, confidence interval; MD, mean difference; mnth, month; MUFA, monounsaturated fatty acids; n/a, not applicable; OB, obese; OW, overweight; Pro, protein

**Supplemental Table S6: Sensitivity analyses of the use of correlation coefficients of 0.25 and 0.75 for crossover trials**

| Outcome (no. crossover trials/total)  | MD (95% CI), P-value<br>I <sup>2</sup> , P-value        |                                                         |                                               |
|---------------------------------------|---------------------------------------------------------|---------------------------------------------------------|-----------------------------------------------|
|                                       | Correlation Coefficient<br>used in the Primary Analysis | Correlation Coefficient used in<br>Sensitivity Analyses |                                               |
|                                       | 0.5                                                     | 0.25                                                    | 0.75                                          |
| Body Weight, kg (6*/32)               | -0.63 [-0.84, -0.42], P<0.01<br>0.00%, P=0.51           | -0.63 [-0.84, -0.42], P<0.01<br>0.00%, P=0.51           | -0.63 [-0.84, -0.43], P<0.01<br>0.00%, P=0.51 |
| BMI, kg/m <sup>2</sup> (3/18)         | -0.26 [-0.36, -0.16], P<0.01<br>0.00%, P=0.91           | -0.26 [-0.36, -0.16], P<0.01<br>0.00%, P=0.90           | -0.26 [-0.35, -0.17], P<0.01<br>0.00%, P=0.90 |
| Body Fat, % (3*/10)                   | -0.01 [-0.58, 0.56], P=0.98<br>65%, P<0.01              | -0.00 [-0.58, 0.58], P=0.99<br>64%, P<0.01              | -0.02 [-0.57, 0.54], P=0.96<br>66%, P<0.01    |
| Waist Circumference, cm (2*/18)       | -0.46 [-1.05, 0.14], P=0.13<br>62%, P<0.01              | -0.44 [-1.04, 0.15], P=0.14<br>60%, P<0.01              | -0.46 [-1.07, 0.14], P=0.13<br>65%, P<0.01    |
| Waist-to-hip Ratio (0/6)              | -0.00 [-0.01, 0.00], P=0.27<br>0.00%, P=0.52            | n/a                                                     | n/a                                           |
| Sagittal Abdominal Diameter, cm (0/6) | -0.09 [-0.34, 0.16], P=0.48<br>0.00%, P=0.92            | n/a                                                     | n/a                                           |

\* one of these crossover trials, however, did not require the use of a correlation coefficient as complete data was available

BMI, body mass index; CI, confidence interval; MD, mean difference; no., number

Supplement Table S7. Continuous meta-regression analysis for the effect of pasta in the context of low-GI dietary patterns on body weight (kg)<sup>1</sup>

| Subgroup                                 | Range                         | No. trials | N    | $\beta$ (95% CI)     | Residual I <sup>2</sup> | P value      |
|------------------------------------------|-------------------------------|------------|------|----------------------|-------------------------|--------------|
| Baseline BMI                             | 24.1 – 37.1 kg/m <sup>2</sup> | 32         | 2448 | -0.04 (-0.13, 0.06)  | 0.00%                   | 0.454        |
| Follow-up                                | 3 – 72 wks                    | 32         | 2448 | 0.01 (-0.01, 0.02)   | 0.00%                   | 0.314        |
| Dose Pasta                               | 1.75 – 7.0 serv/wk            | 11         | 740  | 0.29 (-0.91, 1.50)   | 0.00%                   | 0.595        |
| GI <sup>3</sup>                          | 21 - 72                       | 31         | 2383 | -0.01 (-0.04, 0.02)  | 0.45%                   | 0.482        |
| Difference in GI <sup>2</sup>            | 4.9 - 40.2                    | 31         | 2383 | -0.00 (-0.04, 0.03)  | 2.75%                   | 0.811        |
| Fiber <sup>3</sup>                       | 8.0 - 39.4g/d                 | 27         | 1851 | 0.02 (-0.01, 0.06)   | 0.00%                   | 0.221        |
| Change in Fiber <sup>4</sup>             | -7.5 - +13.8g/d               | 17         | 1571 | -0.02 (-0.07, 0.04)  | 23.13%                  | 0.595        |
| Difference in Fiber <sup>2</sup>         | -8.5 - +15.3g/d               | 27         | 1851 | -0.01 (-0.06, 0.04)  | 0.00%                   | 0.701        |
| Saturated Fat <sup>3</sup>               | 5.1 - 12.5%                   | 14         | 1396 | -0.05 (-0.30, 0.20)  | 34.32%                  | 0.648        |
| Change in Saturated Fat <sup>4</sup>     | -8.2 - -1.2%                  | 12         | 1309 | -0.01 (-0.29, 0.28)  | 46.27%                  | 0.965        |
| Difference in Saturated Fat <sup>2</sup> | -2.0 - +2.3%                  | 14         | 1396 | -0.34 (-1.08, 0.39)  | 32.80%                  | 0.329        |
| CHO <sup>3</sup>                         | 37.2 - 68.0%                  | 30         | 2345 | -0.01 (-0.05, 0.03)  | 0.00%                   | 0.541        |
| Change in CHO <sup>4</sup>               | -7.2 - +10.1%                 | 19         | 2046 | -0.07 (-0.12, -0.01) | 0.00%                   | <b>0.016</b> |
| Difference in CHO <sup>2</sup>           | -11.1 - +5.4%                 | 30         | 2345 | 0.02 (-0.05, 0.10)   | 0.00%                   | 0.547        |
| Protein <sup>3</sup>                     | 13.3 - 26.1%                  | 30         | 2345 | 0.04 (-0.04, 0.12)   | 0.00%                   | 0.332        |

|                                    |               |    |      |                     |        |              |
|------------------------------------|---------------|----|------|---------------------|--------|--------------|
| Change in Protein <sup>4</sup>     | -0.5 - +8.6%  | 19 | 2046 | 0.15 (0.03, 0.27)   | 0.00%  | <b>0.017</b> |
| Difference in Protein <sup>2</sup> | -2.5 - +3.4%  | 30 | 2345 | -0.18 (-0.38, 0.02) | 0.00%  | 0.069        |
| Fat <sup>3</sup>                   | 16.0 - 37.7%  | 30 | 2345 | 0.01 (-0.05, 0.06)  | 0.00%  | 0.852        |
| Change in Fat <sup>4</sup>         | -12.2 - +5.4% | 19 | 2046 | 0.05 (-0.02, 0.12)  | 17.73% | 0.122        |
| Difference in Fat <sup>2</sup>     | -4.4 - +10.6% | 30 | 2345 | 0.02 (-0.05, 0.09)  | 0.00%  | 0.610        |

1 Data is presented as between group mean difference (95% CI) for a 1-unit change in the predictor variable.  $\beta$ -coefficients were estimated using continuous meta-regression analysis. A positive  $\beta$ -coefficient implies an increase in body weight on the pasta/low-GI intervention as the subgroup variable increases, and a negative  $\beta$ -coefficient implies a decrease in body weight. Residual  $I^2$  reports inter-study heterogeneity not explained by the subgroup and was estimated using the Cochran's Q statistic.

2 Difference in diet variable between the intervention and control arms

3 Intake at the end of study in the intervention arm

4 Change in intake from end of study from baseline in intervention arm

BMI, body mass index; CHO, carbohydrate; GI, glycemic index

**Supplemental Table S8. Continuous meta-regression analysis for the effect of pasta in the context of low-GI dietary patterns on BMI (kg/m<sup>2</sup>)<sup>1</sup>**

| Subgroup                                  | Range                         | No. trials | N    | $\beta$ (95% CI)    | Residual I <sup>2</sup> | P value |
|-------------------------------------------|-------------------------------|------------|------|---------------------|-------------------------|---------|
| Baseline BMI                              | 26.3 – 37.1 kg/m <sup>2</sup> | 18         | 1038 | -0.01 (-0.06, 0.03) | 0.00%                   | 0.559   |
| Follow-up                                 | 4 – 24 wks                    | 18         | 1038 | 0.00 (-0.01, 0.02)  | 0.00%                   | 0.559   |
| Dose Pasta*                               | 2.33 – 7.0 serv/wk            | 4          | 143  |                     |                         |         |
| GI <sup>3</sup>                           | 39.8 - 72                     | 17         | 973  | 0.01 (-0.01, 0.03)  | 0.00%                   | 0.153   |
| Difference in GI <sup>2</sup>             | 7.0 - 40.2                    | 17         | 973  | -0.01 (-0.03, 0.01) | 0.00%                   | 0.275   |
| Fiber <sup>3</sup>                        | 8.0 - 39.4g/d                 | 16         | 935  | 0.01 (-0.01, 0.02)  | 0.00%                   | 0.366   |
| Change in Fiber <sup>4</sup>              | -1.8 - +12.4g/d               | 10         | 758  | 0.00 (-0.03, 0.03)  | 0.00%                   | 0.846   |
| Difference in Fiber <sup>2</sup>          | -4.9 - +13.0g/d               | 16         | 935  | -0.00 (-0.02, 0.02) | 0.00%                   | 0.821   |
| Saturated Fat* <sup>3</sup>               | 7.6 - 12.5%                   | 7          |      |                     |                         |         |
| Change in Saturated Fat* <sup>4</sup>     | -2.4 - -1.2%                  | 6          |      |                     |                         |         |
| Difference in Saturated Fat* <sup>2</sup> | -1.0 - +2.3%                  | 7          |      |                     |                         |         |
| CHO <sup>3</sup>                          | 37.2 - 68.0%                  | 16         | 935  | -0.00 (-0.02, 0.01) | 0.00%                   | 0.594   |
| Change in CHO <sup>4</sup>                | -5.6 - +3.2%                  | 10         | 758  | -0.02 (-0.06, 0.02) | 0.00%                   | 0.325   |
| Difference in CHO <sup>2</sup>            | -11.1 - +2.0%                 | 16         | 935  | -0.01 (-0.03, 0.02) | 0.00%                   | 0.531   |
| Protein <sup>3</sup>                      | 13.9 – 22.8%                  | 16         | 935  | 0.00 (-0.04, 0.04)  | 0.00%                   | 0.905   |



|                                    |               |    |     |                     |       |       |
|------------------------------------|---------------|----|-----|---------------------|-------|-------|
| Change in Protein <sup>4</sup>     | -0.2 - +3.0%  | 10 | 758 | 0.01 (-0.11, 0.14)  | 0.00% | 0.786 |
| Difference in Protein <sup>2</sup> | -2.5 - +3.4%  | 16 | 935 | -0.03 (-0.12, 0.06) | 0.00% | 0.441 |
| Fat <sup>3</sup>                   | 16.0 - 37.7%  | 16 | 935 | 0.00 (-0.02, 0.02)  | 0.00% | 0.717 |
| Change in Fat <sup>4</sup>         | -4.8 - +5.4%  | 10 | 758 | 0.02 (-0.02, 0.06)  | 0.00% | 0.240 |
| Difference in Fat <sup>2</sup>     | -4.4 - +10.6% | 16 | 935 | 0.01 (-0.01, 0.04)  | 0.00% | 0.299 |

\*For Dose, there were <10 trials so subgroup analyses were not performed.

1 Data is presented as between group mean difference (95% CI) for a 1-unit change in the predictor variable.  $\beta$ -coefficients were estimated using continuous meta-regression analysis. A positive  $\beta$ -coefficient implies an increase in BMI on the pasta/low-GI intervention as the subgroup variable increases, and a negative  $\beta$ -coefficient implies a decrease in BMI. Residual  $I^2$  reports inter-study heterogeneity not explained by the subgroup and was estimated using the Cochran's Q statistic.

2 Difference in diet variable between the intervention and control arms

3 Intake at the end of study in the intervention arm

4 Change in intake from end of study from baseline in intervention arm

BMI, body mass index; CHO, carbohydrate; GI, glycemic index; wk, week

**Supplemental Table S9. Continuous meta-regression analysis for the effect of pasta in the context of low-GI dietary patterns on body fat (%)<sup>1</sup>**

| Subgroup                                  | Range                         | No. trials | N   | $\beta$ (95% CI)     | Residual I <sup>2</sup> | P value      |
|-------------------------------------------|-------------------------------|------------|-----|----------------------|-------------------------|--------------|
| Baseline BMI                              | 26.3 – 36.0 kg/m <sup>2</sup> | 10         | 285 | -0.02 (-0.26, 0.23)  | 67.69%                  | 0.890        |
| Follow-up                                 | 4 – 24 wks                    | 10         | 285 | 0.06 (-0.06, 0.17)   | 66.00%                  | 0.303        |
| Dose Pasta*                               | 2.33 - 3.33 serv/wk           | 3          | 96  |                      |                         |              |
| GI <sup>3</sup>                           | 39.8 - 72                     | 10         | 285 | 0.12 (-0.00, 0.25)   | 52.21%                  | 0.053        |
| Difference in GI <sup>2</sup>             | 7.0 - 40.2                    | 10         | 285 | -0.09 (-0.15, -0.03) | 19.39%                  | <b>0.008</b> |
| Fiber* <sup>3</sup>                       | 8.0 - 39.4g/d                 | 8          | 228 |                      |                         |              |
| Change in Fiber* <sup>4</sup>             | -1.8 - +12.4g/d               | 4          | 87  |                      |                         |              |
| Difference in Fiber* <sup>2</sup>         | -4.9 - +13.0g/d               | 8          | 228 |                      |                         |              |
| Saturated Fat* <sup>3</sup>               | 7.6 - 12.5%                   | 3          | 93  |                      |                         |              |
| Change in Saturated Fat* <sup>4</sup>     | -2.4 - -1.2%                  | 2          | 51  |                      |                         |              |
| Difference in Saturated Fat* <sup>2</sup> | -1.0 - +2.3%                  | 3          | 93  |                      |                         |              |
| CHO* <sup>3</sup>                         | 37.2 - 68.0%                  | 9          | 247 |                      |                         |              |
| Change in CHO* <sup>4</sup>               | -5.6 - +3.2%                  | 4          | 87  |                      |                         |              |
| Difference in CHO* <sup>2</sup>           | -11.1 - +2.0%                 | 9          | 247 |                      |                         |              |
| Protein* <sup>3</sup>                     | 13.9 – 22.8%                  | 9          | 247 |                      |                         |              |

|                                     |               |   |     |  |  |  |
|-------------------------------------|---------------|---|-----|--|--|--|
| Change in Protein* <sup>4</sup>     | -0.2 - +3.0%  | 4 | 87  |  |  |  |
| Difference in Protein* <sup>2</sup> | -2.5 - +3.4%  | 9 | 247 |  |  |  |
| Fat* <sup>3</sup>                   | 16.0 - 37.7%  | 9 | 247 |  |  |  |
| Change in Fat* <sup>4</sup>         | -4.8 - +5.4%  | 4 | 87  |  |  |  |
| Difference in Fat* <sup>2</sup>     | -4.4 - +10.6% | 9 | 247 |  |  |  |

\*There were <10 trials so subgroup analyses were not performed.

1 Data is presented as between group mean difference (95% CI) for a 1-unit change in the predictor variable.  $\beta$  -coefficients were estimated using continuous meta-regression analysis. A positive  $\beta$  -coefficient implies an increase in body fat on the pasta/low-GI intervention as the subgroup variable increases, and a negative  $\beta$  -coefficient implies a decrease in body fat. Residual  $I^2$  reports inter-study heterogeneity not explained by the subgroup and was estimated using the Cochran's Q statistic.

2 Difference in diet variable between the intervention and control arms

3 Intake at the end of study in the intervention arm

4 Change in intake from end of study from baseline in intervention arm

BMI, body mass index; CHO, carbohydrate; GI, glycemic index; wk, week

**Supplemental Table S10. Continuous meta-regression analysis for the effect of pasta in the context of low-GI dietary patterns on waist circumference (cm)<sup>1</sup>**

| Subgroup                                  | Range                         | No. trials | N    | $\beta$ (95% CI)     | Residual I <sup>2</sup> | P value      |
|-------------------------------------------|-------------------------------|------------|------|----------------------|-------------------------|--------------|
| Baseline BMI                              | 26.3 – 36.0 kg/m <sup>2</sup> | 18         | 1380 | 0.10 (-0.13, 0.32)   | 59.02%                  | 0.372        |
| Follow-up                                 | 4 – 52 wks                    | 18         | 1380 | 0.05 (-0.03, 0.13)   | 60.50%                  | 0.225        |
| Dose Pasta*                               | 3.0 – 3.33 serv/wk            | 2          | 63   |                      |                         |              |
| GI <sup>3</sup>                           | 41.2 – 72.0                   | 17         | 1315 | -0.01 (-0.12, 0.10)  | 66.00%                  | 0.841        |
| Difference in GI <sup>2</sup>             | 4.9 – 32.9                    | 17         | 1315 | -0.02 (-0.10, 0.06)  | 64.51%                  | 0.596        |
| Fiber <sup>3</sup>                        | 8.0 - 39.4g/d                 | 15         | 1258 | 0.05 (-0.05, 0.14)   | 59.60%                  | 0.342        |
| Change in Fiber <sup>4</sup>              | -1.8 - +13.8g/d               | 13         | 1176 | 0.01 (-0.17, 0.20)   | 70.59%                  | 0.861        |
| Difference in Fiber <sup>2</sup>          | -4.9 - +15.3g/d               | 15         | 1258 | -0.00 (-0.14, 0.13)  | 64.86%                  | 0.939        |
| Saturated Fat* <sup>3</sup>               | 6.1 – 10.1%                   | 8          | 604  |                      |                         |              |
| Change in Saturated Fat* <sup>4</sup>     | -7.6 - -1.2%                  | 7          | 562  |                      |                         |              |
| Difference in Saturated Fat* <sup>2</sup> | -2.0 - +2.3%                  | 8          | 604  |                      |                         |              |
| CHO <sup>3</sup>                          | 38.5 - 58.6%                  | 16         | 1277 | -0.11 (-0.19, -0.04) | 27.06%                  | <b>0.007</b> |
| Change in CHO <sup>4</sup>                | -7.2 - +10.1%                 | 13         | 1176 | -0.09 (-0.23, 0.04)  | 57.19%                  | 0.148        |
| Difference in CHO <sup>2</sup>            | -11.1 - +5.4%                 | 16         | 1277 | -0.01 (-0.18, 0.17)  | 60.81%                  | 0.947        |
| Protein <sup>3</sup>                      | 13.9 – 26.1%                  | 16         | 1277 | 0.20 (0.01, 0.38)    | 43.92%                  | <b>0.038</b> |

|                                    |               |    |      |                     |        |       |
|------------------------------------|---------------|----|------|---------------------|--------|-------|
| Change in Protein <sup>4</sup>     | -0.3 - +8.6%  | 13 | 1176 | 0.19 (-0.09, 0.46)  | 63.38% | 0.165 |
| Difference in Protein <sup>2</sup> | -2.5 - +3.4%  | 16 | 1277 | -0.14 (-0.66, 0.38) | 62.79% | 0.570 |
| Fat <sup>3</sup>                   | 22.0 - 37.2%  | 16 | 1277 | 0.10 (-0.05, 0.26)  | 53.48% | 0.185 |
| Change in Fat <sup>4</sup>         | -12.2 - +5.4% | 13 | 1176 | 0.08 (-0.07, 0.24)  | 61.15% | 0.274 |
| Difference in Fat <sup>2</sup>     | -4.4 - +10.6% | 16 | 1277 | 0.09 (-0.06, 0.25)  | 47.17% | 0.220 |

\*There were <10 trials so subgroup analyses were not performed.

1 Data is presented as between group mean difference (95% CI) for a 1-unit change in the predictor variable.  $\beta$ -coefficients were estimated using continuous meta-regression analysis. A positive  $\beta$ -coefficient implies an increase in waist circumference on the pasta/low-GI intervention as the subgroup variable increases, and a negative  $\beta$ -coefficient implies a decrease in waist circumference. Residual  $I^2$  reports inter-study heterogeneity not explained by the subgroup and was estimated using the Cochran's Q statistic.

2 Difference in diet variable between the intervention and control arms

3 Intake at the end of study in the intervention arm

4 Change in intake from end of study from baseline in intervention arm

BMI, body mass index; CHO, carbohydrate; GI, glycemic index; wk, week

**Supplementary Table S11. Post-hoc piecewise linear continuous dose-response meta-regression analyses for the effect of pasta intake in the context of low-GI dietary patterns on body weight (kg)**

| Dose threshold of servings of pasta consumed per week | Dose ranges of servings of pasta consumed per week | $\beta$ (95% CIs) * | Residual $I^2$ † | $p$ -value |
|-------------------------------------------------------|----------------------------------------------------|---------------------|------------------|------------|
| 3.0                                                   | $\leq 3.0$                                         | -0.70 (-3.27, 1.86) | 0.00%            | 0.890      |
|                                                       | $> 3.0$                                            | 0.91 (-0.89, 2.70)  |                  |            |
| 3.33                                                  | $\leq 3.33$                                        | 0.05 (-1.80, 1.89)  | 0.00%            | 0.518      |
|                                                       | $> 3.33$                                           | 0.44 (-1.75, 2.63)  |                  |            |
| 3.5                                                   | $\leq 3.5$                                         | 0.09 (-1.65, 1.82)  | 0.00%            | 0.888      |
|                                                       | $> 3.5$                                            | 0.46 (-1.89, 2.81)  |                  |            |

\*  $\beta$  is the slope derived from the piecewise linear meta-regression analyses and represents the treatment effect on body weight for doses above and below each dose-threshold representing servings of pasta consumption per week; † The residual  $I^2$  value indicates heterogeneity unexplained by each dose-threshold.

Supplementary Table S12: GRADE assessment of study quality

| Quality assessment*                                     |                   |              |               |                      |             |                  | № of patients  |                | Effect                                               | Quality Importance                                                 |
|---------------------------------------------------------|-------------------|--------------|---------------|----------------------|-------------|------------------|----------------|----------------|------------------------------------------------------|--------------------------------------------------------------------|
| № of studies                                            | Design            | Risk of bias | Inconsistency | Indirectness         | Imprecision | Publication Bias | Pasta/LGI diet | Higher GI diet | Absolute (95% CI)                                    |                                                                    |
| <b>Body Weight (follow up: median 12 weeks)</b>         |                   |              |               |                      |             |                  |                |                |                                                      |                                                                    |
| 32                                                      | randomised trials | not serious  | not serious   | serious <sup>a</sup> | not serious | none             | 1294           | 1228           | MD <b>-0.63 kg</b><br>(-0.84 to -0.42)               | ⊕⊕⊕○<br>MODERATE <sup>a</sup><br>Due to downgrade for indirectness |
| <b>BMI (follow up: median 12 weeks)</b>                 |                   |              |               |                      |             |                  |                |                |                                                      |                                                                    |
| 18                                                      | randomised trials | not serious  | not serious   | serious <sup>a</sup> | not serious | none             | 551            | 538            | MD <b>-0.26 kg/m<sup>2</sup></b><br>(-0.36 to -0.16) | ⊕⊕⊕○<br>MODERATE <sup>a</sup><br>Due to downgrade for indirectness |
| <b>Waist Circumference (follow up: median 12 weeks)</b> |                   |              |               |                      |             |                  |                |                |                                                      |                                                                    |

1  
2  
3  
4  
5  
6  
7  
8  
9  
10  
11  
12  
13  
14  
15  
16  
17  
18  
19  
20  
21  
22  
23  
24  
25  
26  
27  
28  
29  
30  
31  
32  
33  
34  
35  
36  
37  
38  
39  
40  
41  
42  
43  
44  
45  
46  
47

| Quality assessment*                                    |                   |              |                      |                      |             |                  | № of patients  |                | Effect                                | Quality Importance                                                                |
|--------------------------------------------------------|-------------------|--------------|----------------------|----------------------|-------------|------------------|----------------|----------------|---------------------------------------|-----------------------------------------------------------------------------------|
| № of studies                                           | Design            | Risk of bias | Inconsistency        | Indirectness         | Imprecision | Publication Bias | Pasta/LGI diet | Higher GI diet | Absolute (95% CI)                     |                                                                                   |
| 18                                                     | randomised trials | not serious  | serious <sup>b</sup> | serious <sup>a</sup> | not serious | none             | 717            | 624            | MD <b>-0.46 cm</b><br>(-1.05 to 0.14) | ⊕⊕○○<br>LOW <sup>a,b</sup><br>Due to downgrade for inconsistency and indirectness |
| <b>Body Fat (follow up: median 12 weeks)</b>           |                   |              |                      |                      |             |                  |                |                |                                       |                                                                                   |
| 10                                                     | randomised trials | not serious  | serious <sup>c</sup> | serious <sup>a</sup> | not serious | none             | 176            | 165            | MD <b>-0.01 %</b><br>(-0.58 to 0.56)  | ⊕⊕○○<br>LOW <sup>a,c</sup><br>Due to downgrade for inconsistency and indirectness |
| <b>Waist-to-hip Ratio (follow up: median 12 weeks)</b> |                   |              |                      |                      |             |                  |                |                |                                       |                                                                                   |



| Quality assessment*                                             |                   |              |               |                      |             |                   | № of patients  |                | Effect                                | Quality Importance                                                       |
|-----------------------------------------------------------------|-------------------|--------------|---------------|----------------------|-------------|-------------------|----------------|----------------|---------------------------------------|--------------------------------------------------------------------------|
| № of studies                                                    | Design            | Risk of bias | Inconsistency | Indirectness         | Imprecision | Publication Bias  | Pasta/LGI diet | Higher GI diet | Absolute (95% CI)                     |                                                                          |
| 6                                                               | randomised trials | not serious  | not serious   | serious <sup>a</sup> | not serious | none <sup>d</sup> | 223            | 222            | MD <b>-0.00</b><br>(-0.01 to 0.00)    | ⊕⊕⊕○<br>MODERATE <sup>a</sup><br>Due to<br>downgrade for<br>indirectness |
| <b>Sagittal Abdominal Diameter (follow up: median 26 weeks)</b> |                   |              |               |                      |             |                   |                |                |                                       |                                                                          |
| 3                                                               | randomised trials | not serious  | not serious   | serious <sup>a</sup> | not serious | none <sup>d</sup> | 237            | 214            | MD <b>-0.09 cm</b><br>(-0.34 to 0.16) | ⊕⊕⊕○<br>MODERATE <sup>a</sup><br>Due to<br>downgrade for<br>indirectness |

CI, Confidence interval; GI, glycemic index; LGI, low glycemic index; MD, Mean difference

\*All outcomes started with high quality evidence since all studies were randomized controlled trials. Risk of Bias – We rated down for risk of bias if the majority of studies were considered to be at high risk of bias. Inconsistency – We assessed inconsistency using  $I^2$  estimates where an  $I^2$  of 50% or higher indicates substantial heterogeneity.  $I^2$  is the percentage of variability in the treatment estimates that is attributable to heterogeneity between studies. We rated down for inconsistency if there was substantial heterogeneity that was unexplained by any a priori sensitivity or subgroup analyses. Indirectness – We rated down for indirectness if there were factors present relating to the population, interventions, and outcomes that limited the generalizability of the results. Imprecision – We rated down for imprecision if the 95% confidence interval (95% CI) crossed the minimally important difference (MID) for harm. MIDs used for each outcome are: 0.5kg for body weight (based on Johnston et al. JAMA 2014;312(9):923-33); 0.2kg/m<sup>2</sup> for BMI; 2.0cm for waist circumference; 2.0% for body fat; 0.02 for waist-to-hip ratio; 2.0cm for sagittal abdominal diameter.

1  
2  
3 a. Downgrade for serious indirectness, since most of the available trials did not quantify the amount of pasta consumed in the context  
4 of the low-GI dietary patterns  
5

6 b. Downgrade for serious inconsistency, as there was evidence of substantial inter-study ( $I^2=62\%$ , P-heterogeneity<0.001), which  
7 could not be explained  
8

9 c. Downgrade for serious inconsistency, as there was evidence of substantial inter-study ( $I^2= 65\%$ , P-heterogeneity=0.003), which  
10 could not be explained  
11

12 d. No downgrade for publication bias, as publication bias could not be assessed due to lack of power for assessing funnel plot  
13 asymmetry and small study effects (<10 trials included in the meta-analysis)  
14  
15  
16  
17  
18  
19  
20  
21  
22  
23  
24  
25  
26  
27  
28  
29  
30  
31  
32  
33  
34  
35  
36  
37  
38  
39  
40  
41  
42  
43  
44  
45  
46  
47

**Supplemental Figures**

|                             | Random Sequence Generation | Allocation Concealment | Blinding of Participants, Personnel and Outcome Assessment | Incomplete Outcome Data | Selective Reporting |                                     | Random Sequence Generation | Allocation Concealment | Blinding of Participants, Personnel and Outcome Assessment | Incomplete Outcome Data | Selective Reporting |
|-----------------------------|----------------------------|------------------------|------------------------------------------------------------|-------------------------|---------------------|-------------------------------------|----------------------------|------------------------|------------------------------------------------------------|-------------------------|---------------------|
| Abete et al. 2008           | ?                          | ?                      | ?                                                          | +                       | +                   | Jimenez-Cruz et al. 2003            | ?                          | ?                      | ?                                                          | ?                       | +                   |
| Aston et al. 2008           | +                          | ?                      | +                                                          | +                       | +                   | Karl et al. 2015                    | +                          | +                      | +                                                          | +                       | +                   |
| Bellisle et al. 2007        | ?                          | ?                      | ?                                                          | ?                       | +                   | Larsen et al. 2010 -LowPro          | +                          | +                      | +                                                          | +                       | +                   |
| Buscemi et al. 2012         | +                          | +                      | +                                                          | ?                       | +                   | Larsen et al. 2010 -HighPro         | +                          | +                      | +                                                          | +                       | +                   |
| Cost et al. 2012            | ?                          | ?                      | +                                                          | +                       | +                   | McMillan-Price et al. 2006- HighCHO | ?                          | ?                      | +                                                          | +                       | +                   |
| de Rougemont et al. 2007    | ?                          | +                      | +                                                          | +                       | +                   | McMillan-Price et al. 2006- HighPro | ?                          | ?                      | +                                                          | +                       | +                   |
| Fontvielle et al. 1992      | ?                          | ?                      | +                                                          | +                       | +                   | Pereira et al. 2015                 | ?                          | ?                      | +                                                          | ?                       | +                   |
| Fontvielle et al. 1988      | ?                          | ?                      | +                                                          | +                       | +                   | Philippou et al. 2008               | ?                          | ?                      | +                                                          | ?                       | +                   |
| Frost et al. 2004           | ?                          | ?                      | +                                                          | +                       | +                   | Philippou et al. 2009-4mo           | ?                          | ?                      | +                                                          | ?                       | +                   |
| Heilbronn et al. 2002       | ?                          | ?                      | +                                                          | ?                       | +                   | Philippou et al. 2009-6mo           | ?                          | ?                      | ?                                                          | ?                       | +                   |
| Jebb et al. 2010 - HighMUFA | +                          | ?                      | +                                                          | ?                       | +                   | Sicheri et al. 2007                 | +                          | ?                      | +                                                          | ?                       | +                   |
| Jebb et al. 2010 - LowFat   | +                          | ?                      | +                                                          | ?                       | +                   | Solomon et al. 2010                 | ?                          | ?                      | +                                                          | +                       | +                   |
| Jenkins et al. 2014         | +                          | +                      | +                                                          | +                       | +                   | Visek et al. 2014                   | ?                          | ?                      | +                                                          | +                       | +                   |
| Jenkins et al. 2012         | +                          | +                      | +                                                          | +                       | +                   | Wolever et al. 2008                 | +                          | +                      | ?                                                          | +                       | +                   |
| Jenkins et al. 2008         | +                          | +                      | +                                                          | +                       | +                   | Wolever et al. 2002                 | +                          | +                      | +                                                          | +                       | +                   |
| Jensen et al. 2008          | ?                          | ?                      | +                                                          | +                       | +                   | Yusof et al. 2009                   | +                          | ?                      | +                                                          | +                       | +                   |

**Supplemental Figure S1: Cochrane risk of bias summary for all included trials**

Summary of risk of bias ratings for each individual study included in the meta-analysis.

1  
2  
3  
4  
5  
6  
7  
8  
9  
10  
11  
12  
13  
14  
15  
16  
17  
18  
19  
20  
21  
22  
23  
24  
25  
26  
27  
28  
29  
30  
31  
32  
33  
34  
35  
36  
37  
38  
39  
40  
41  
42  
43  
44  
45  
46  
47

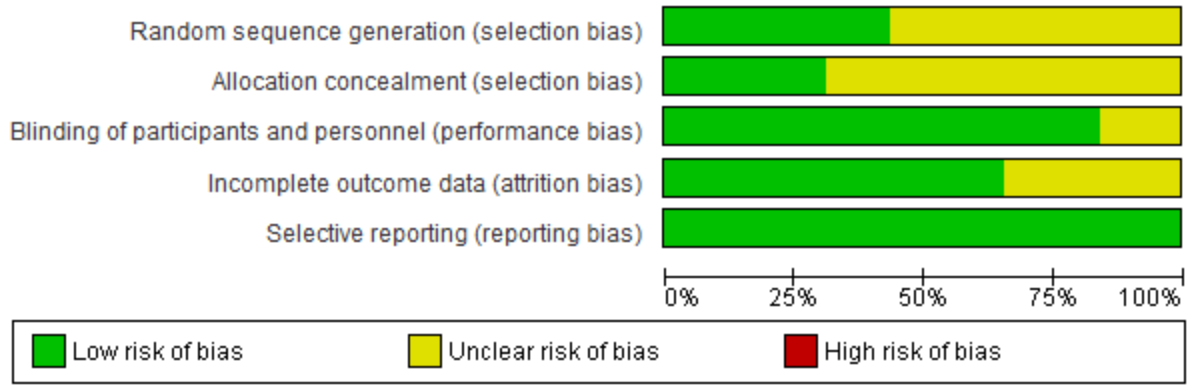

**Supplemental Figure S2: Risk of bias proportion graph for all included trials**

Peer review only

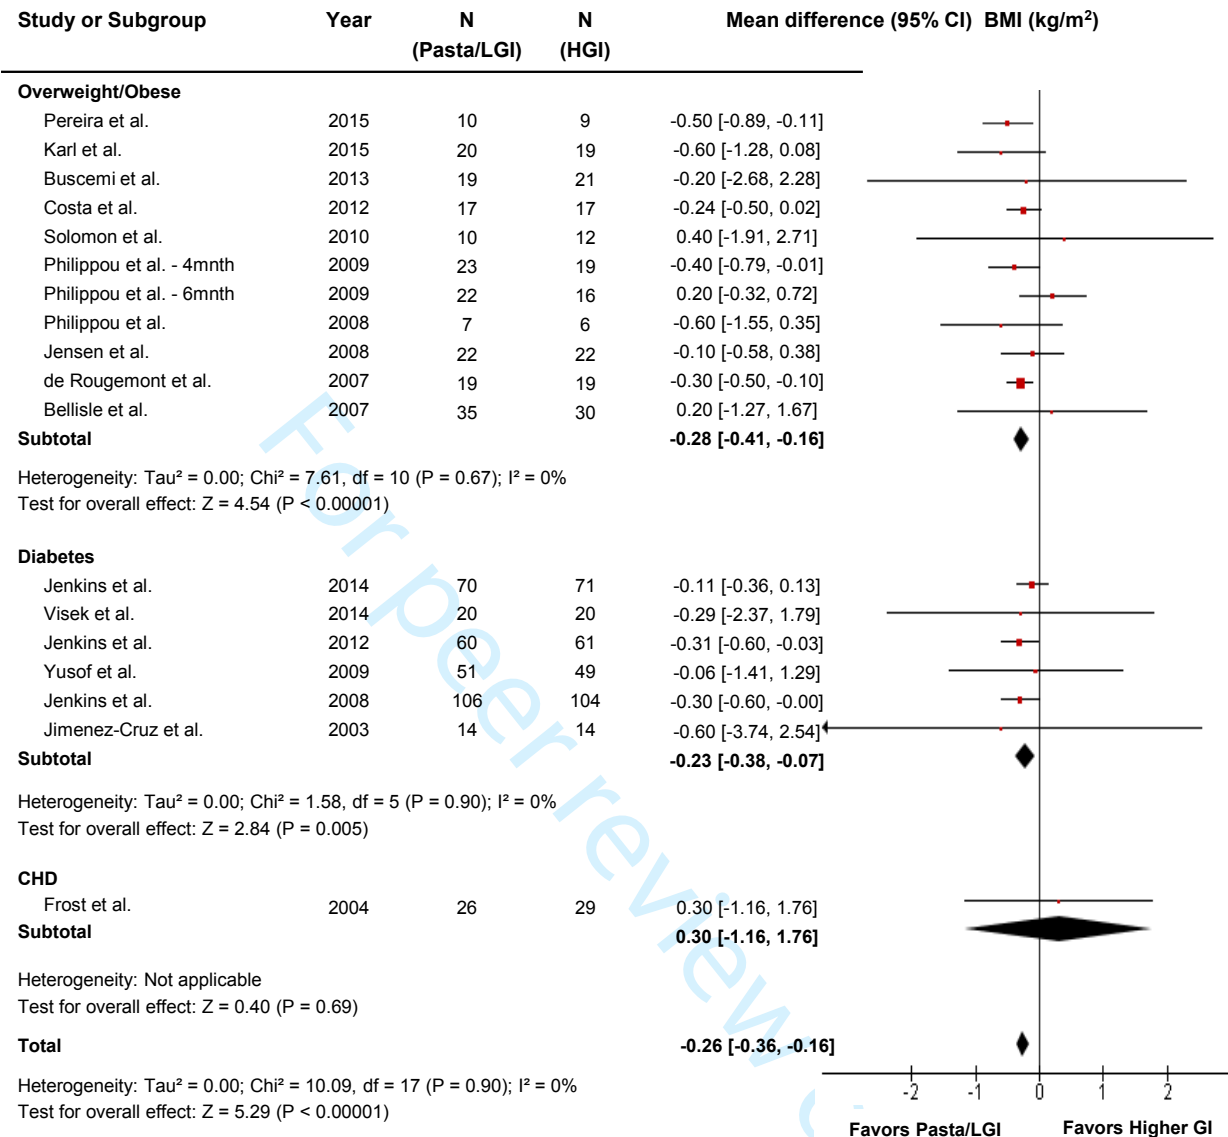

### Supplemental Figure S3: Forest plot of randomized controlled trials investigating the effects of pasta in the context of low-GI dietary patterns on BMI (kg/m<sup>2</sup>) (n= 1038)

Data are expressed as mean differences represented by a square and 95% CIs by the line through the square. 95% CIs exceeding the plot's bounds are represented by an arrowhead. Pooled effect estimates are represented by diamonds and were estimated with the use of generic inverse variance random effects models. Between-study heterogeneity was detected with the use of the Cochran's Q statistic at a significance level of  $P < 0.10$  and quantified with the use of the  $I^2$  statistic where  $I^2 \geq 50\%$  is considered to be evidence of substantial heterogeneity and  $\geq 75\%$  considerable heterogeneity.

BMI, body mass index; CHD, coronary heart disease; CI, confidence interval; HGI, higher glycemic index diet; GI, glycemic index; LGI, low glycemic index diet

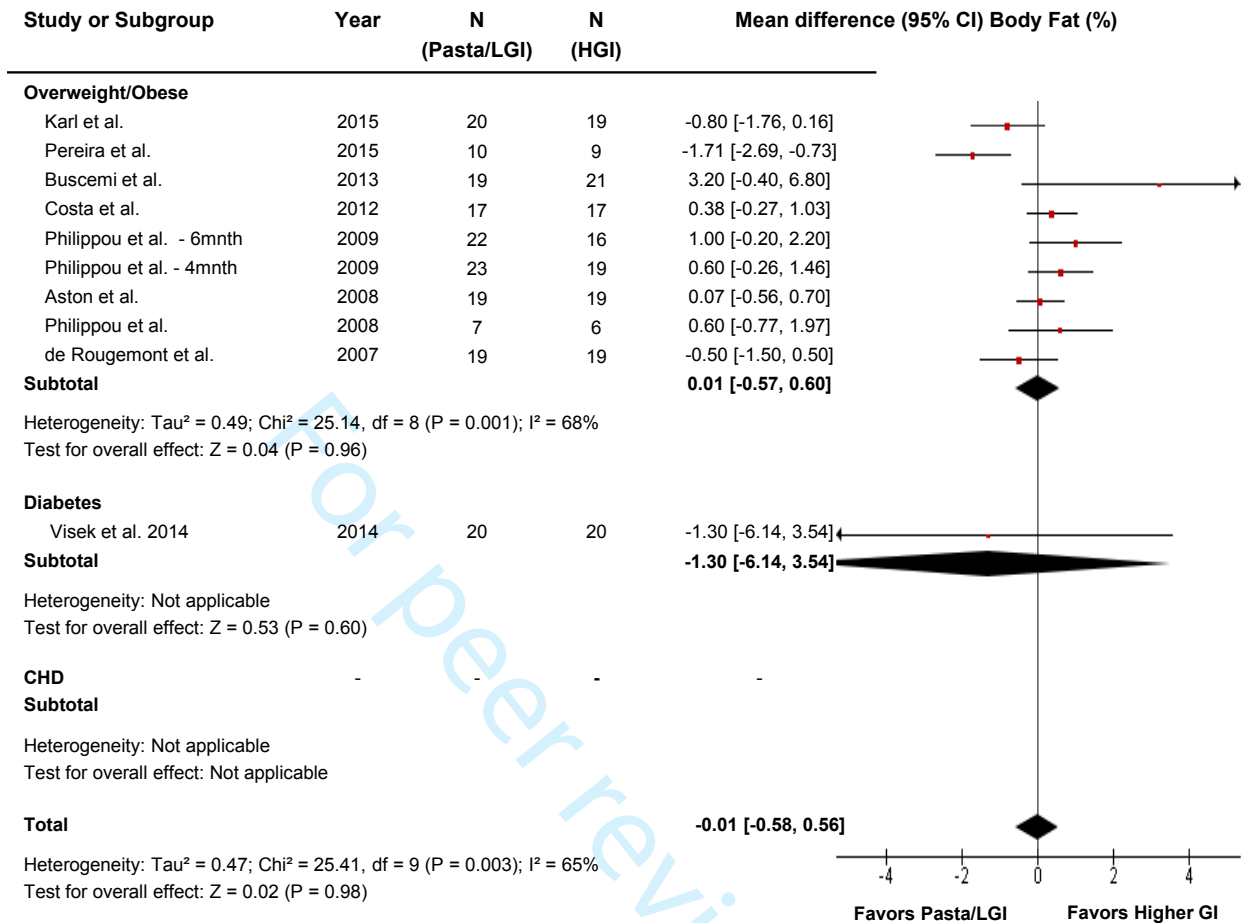

### Supplemental Figure S4: Forest plot of randomized controlled trials investigating the effects of pasta in the context of low-GI dietary patterns on body fat (%) (n= 285)

Data are expressed as mean differences represented by a square and 95% CIs by the line through the square. 95% CIs exceeding the plot's bounds are represented by an arrowhead. Pooled effect estimates are represented by diamonds and were estimated with the use of generic inverse variance random effects models. Between-study heterogeneity was detected with the use of the Cochran's Q statistic at a significance level of  $P < 0.10$  and quantified with the use of the  $I^2$  statistic where  $I^2 \geq 50\%$  is considered to be evidence of substantial heterogeneity and  $\geq 75\%$  considerable heterogeneity.

CHD, coronary heart disease; CI, confidence interval; HGI, higher glycemic index diet; GI, glycemic index; LGI, low glycemic index diet

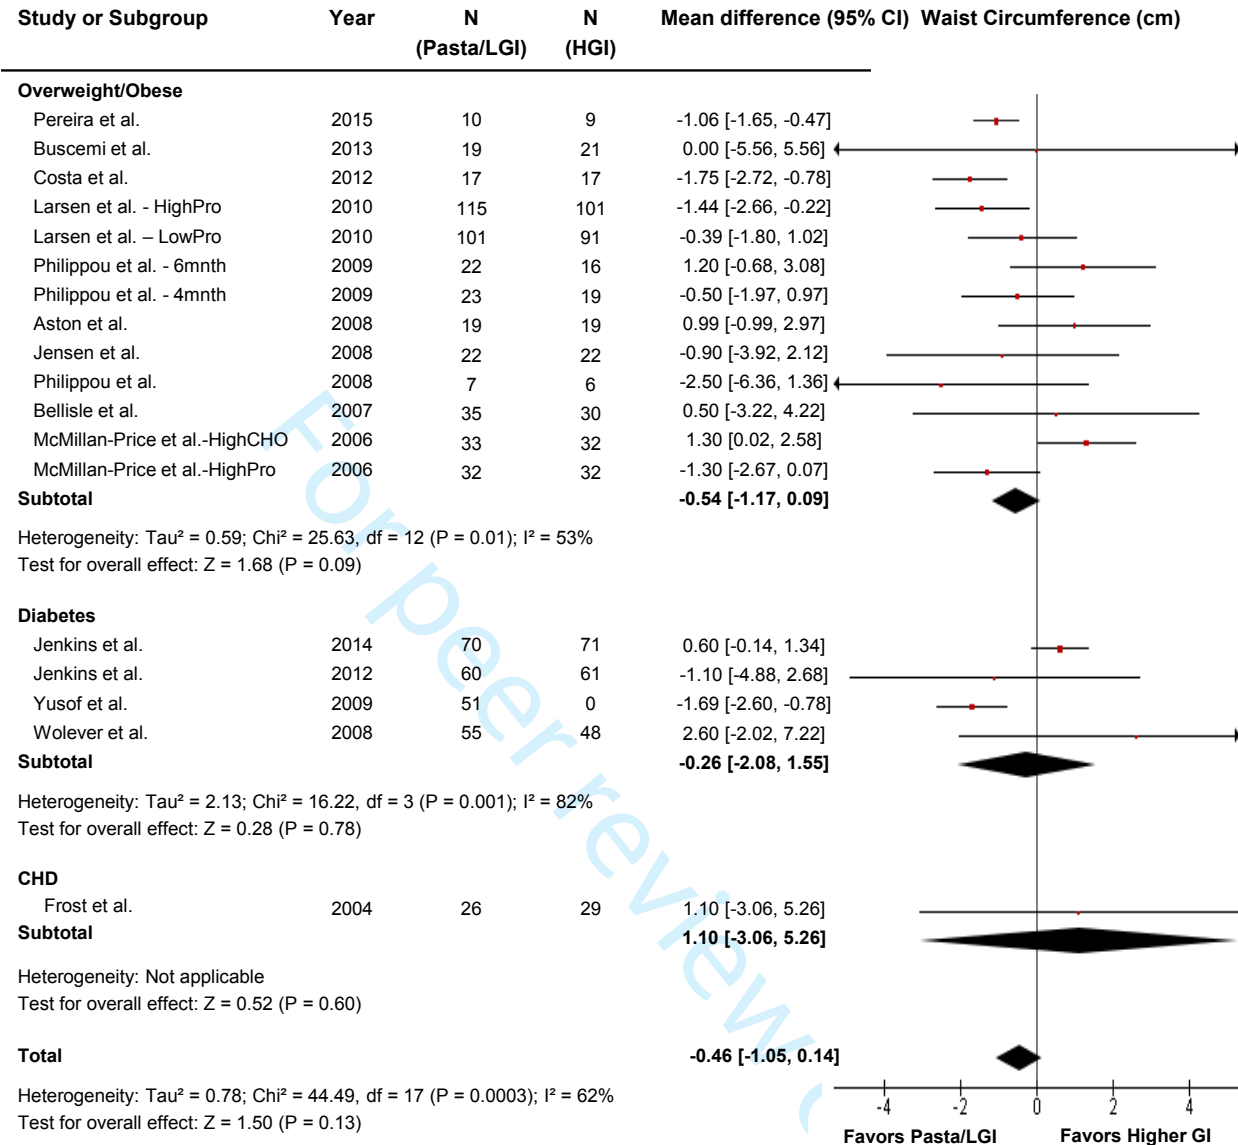

**Supplemental Figure S5: Forest plot of randomized controlled trials investigating the effects of pasta in the context of low-GI dietary patterns on waist circumference (cm) (n = 1380)**

Data are expressed as mean differences represented by a square and 95% CIs by the line through the square. 95% CIs exceeding the plot’s bounds are represented by an arrowhead. Pooled effect estimates are represented by diamonds and were estimated with the use of generic inverse variance random effects models. Between-study heterogeneity was detected with the use of the Cochran’s Q statistic at a significance level of P<0.10 and quantified with the use of the I<sup>2</sup> statistic where I<sup>2</sup>≥50% is considered to be evidence of substantial heterogeneity and ≥75% considerable heterogeneity.

CHD, coronary heart disease; CHO, carbohydrate; CI, confidence interval; HGI, higher glycemic index diet; GI, glycemic index; LGI, low glycemic index diet; Pro, protein

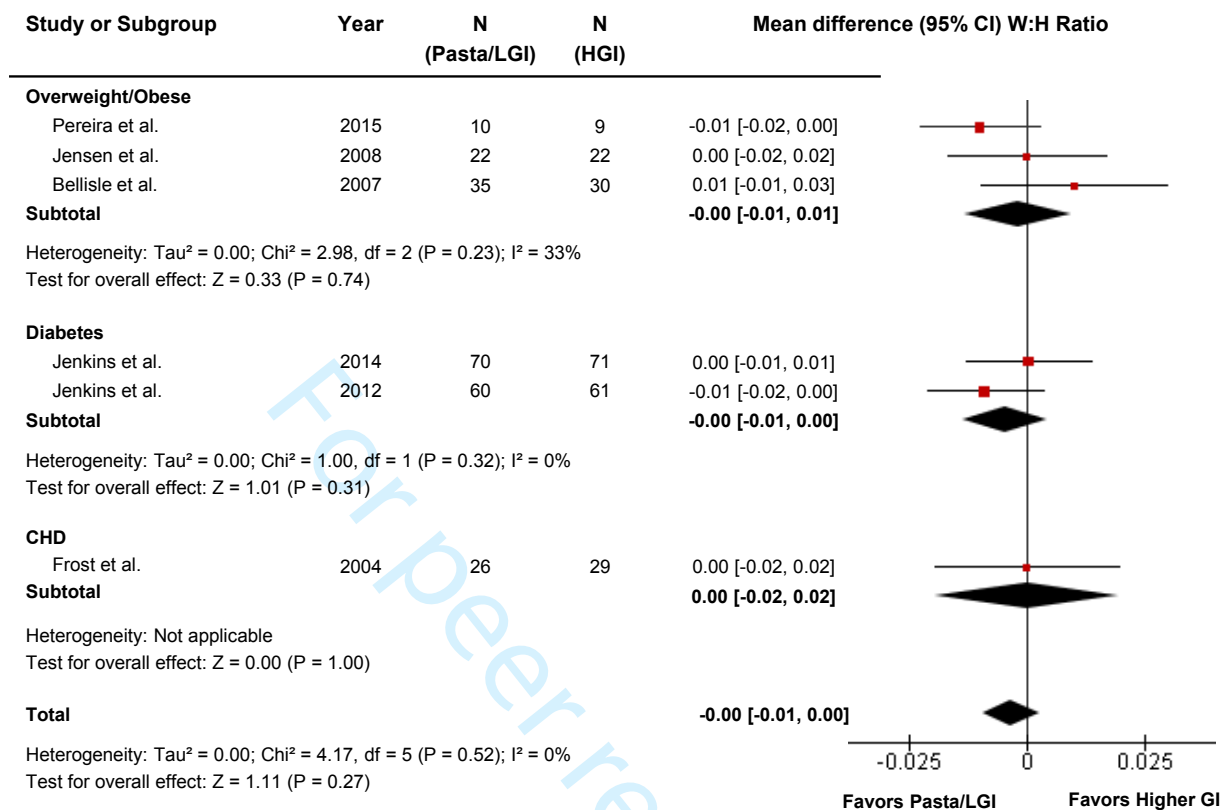

### Supplemental Figure S6: Forest plot of randomized controlled trials investigating the effects of pasta in the context of low-GI dietary patterns on waist-to-hip ratio (n = 445)

Data are expressed as mean differences represented by a square and 95% CIs by the line through the square. 95% CIs exceeding the plot's bounds are represented by an arrowhead. Pooled effect estimates are represented by diamonds and were estimated with the use of generic inverse variance random effects models. Between-study heterogeneity was detected with the use of the Cochran's Q statistic at a significance level of  $P < 0.10$  and quantified with the use of the  $I^2$  statistic where  $I^2 \geq 50\%$  is considered to be evidence of substantial heterogeneity and  $\geq 75\%$  considerable heterogeneity.

CHD, coronary heart disease; CI, confidence interval; HGI, higher glycemic index diet; GI, glycemic index; LGI, low glycemic index diet



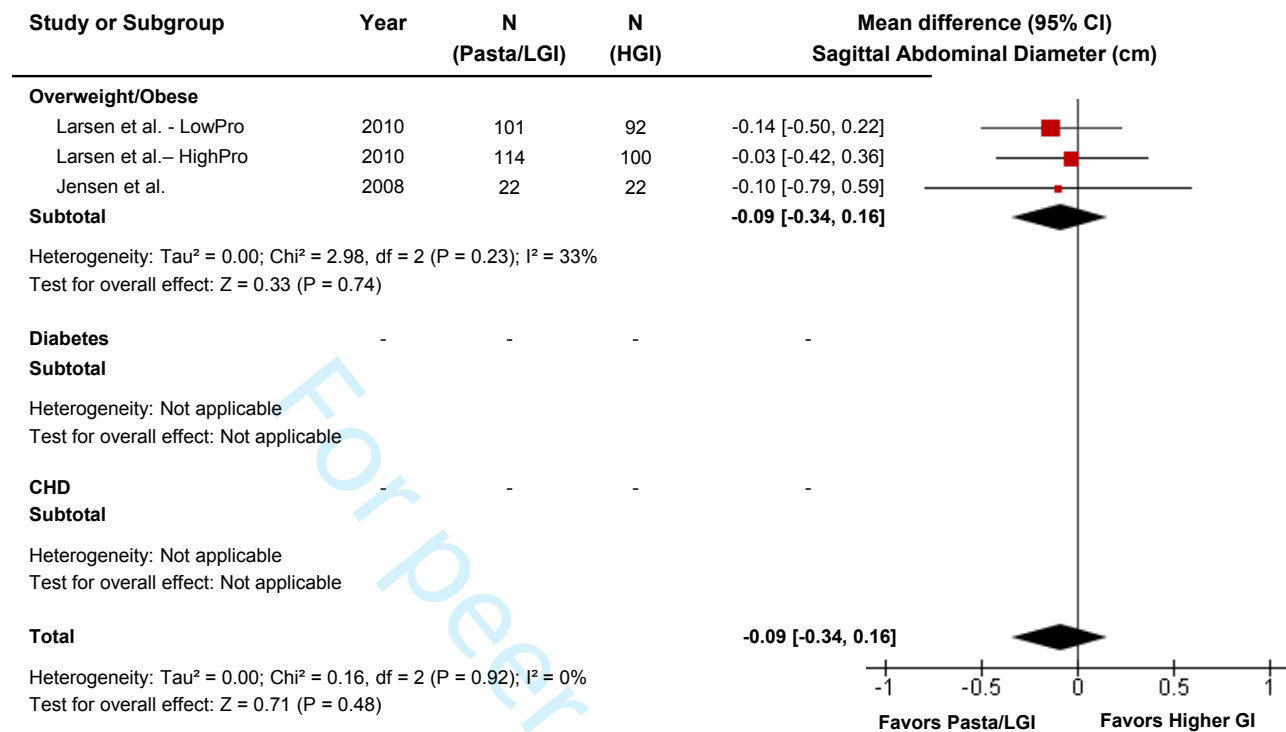

### Supplemental Figure S7: Forest plot of randomized controlled trials investigating the effects of pasta in the context of low-GI dietary patterns on sagittal abdominal diameter (cm) (n = 478)

Data are expressed as mean differences represented by a square and 95% CIs by the line through the square. 95% CIs exceeding the plot's bounds are represented by an arrowhead. Pooled effect estimates are represented by diamonds and were estimated with the use of generic inverse variance random effects models. Between-study heterogeneity was detected with the use of the Cochran's Q statistic at a significance level of  $P < 0.10$  and quantified with the use of the  $I^2$  statistic where  $I^2 \geq 50\%$  is considered to be evidence of substantial heterogeneity and  $\geq 75\%$  considerable heterogeneity.

CHD, coronary heart disease; CI, confidence interval; HGI, higher glycemic index diet; GI, glycemic index; LGI, low glycemic index diet; Pro, protein

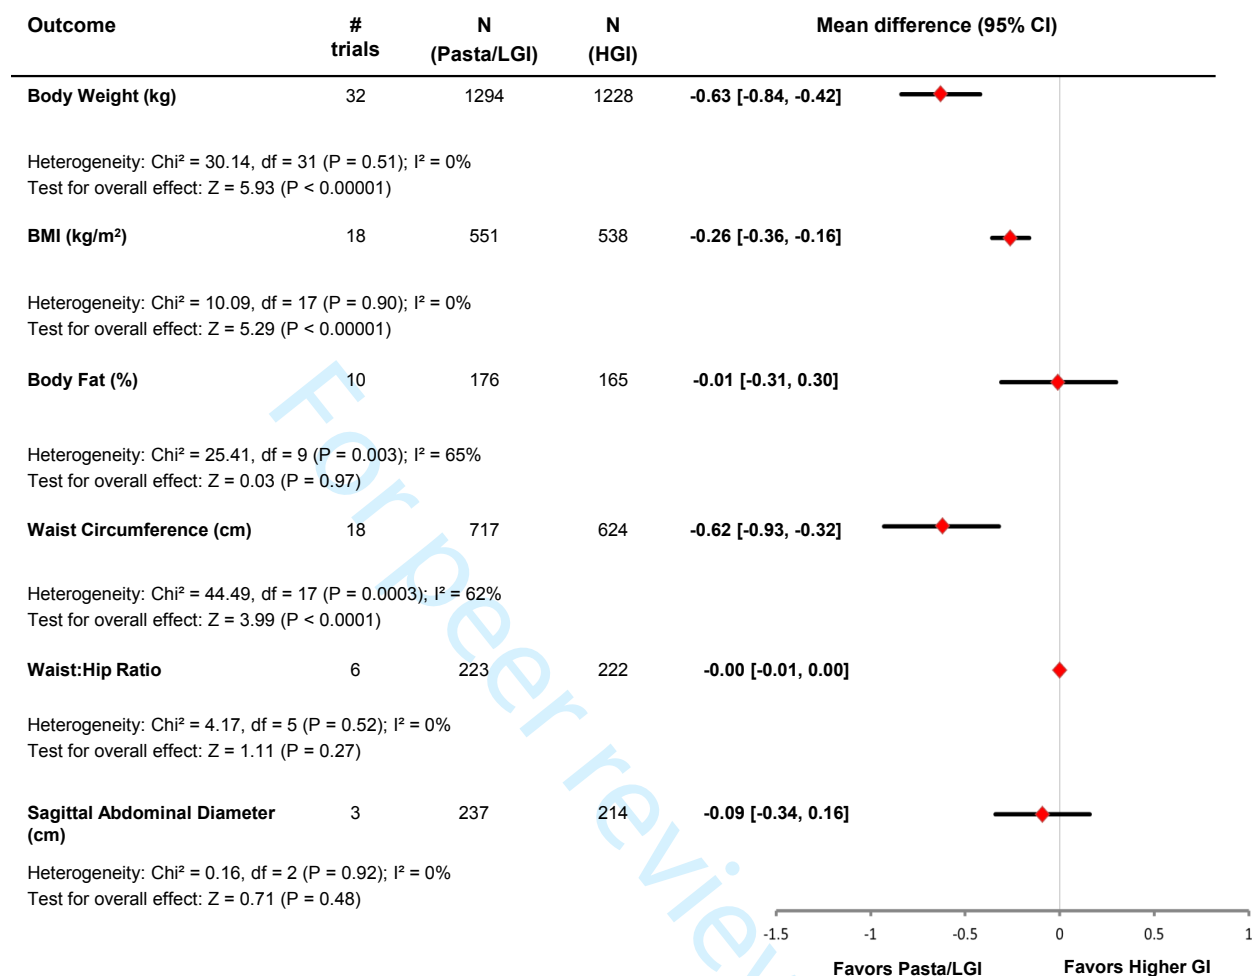

**Supplemental Figure S8: Forest plot of randomized controlled trials investigating the effects of pasta in the context of low-GI dietary patterns on body weight (kg) using fixed effects models (n = 2448)**

Data are expressed as mean differences represented by a square and 95% CIs by the line through the square. 95% CIs exceeding the plot's bounds are represented by an arrowhead. Pooled effect estimates are represented by diamonds and were estimated with the use of generic inverse variance fixed effects models. Between-study heterogeneity was detected with the use of the Cochran's Q statistic at a significance level of  $P < 0.10$  and quantified with the use of the  $I^2$  statistic where  $I^2 \geq 50\%$  is considered to be evidence of substantial heterogeneity and  $\geq 75\%$  considerable heterogeneity.

CHD, coronary heart disease; CHO, carbohydrate; CI, confidence interval; HGI, higher glycemic index diet; GI, glycemic index; LGI, low glycemic index diet; MUFA, monounsaturated fatty acids; Pro, protein.

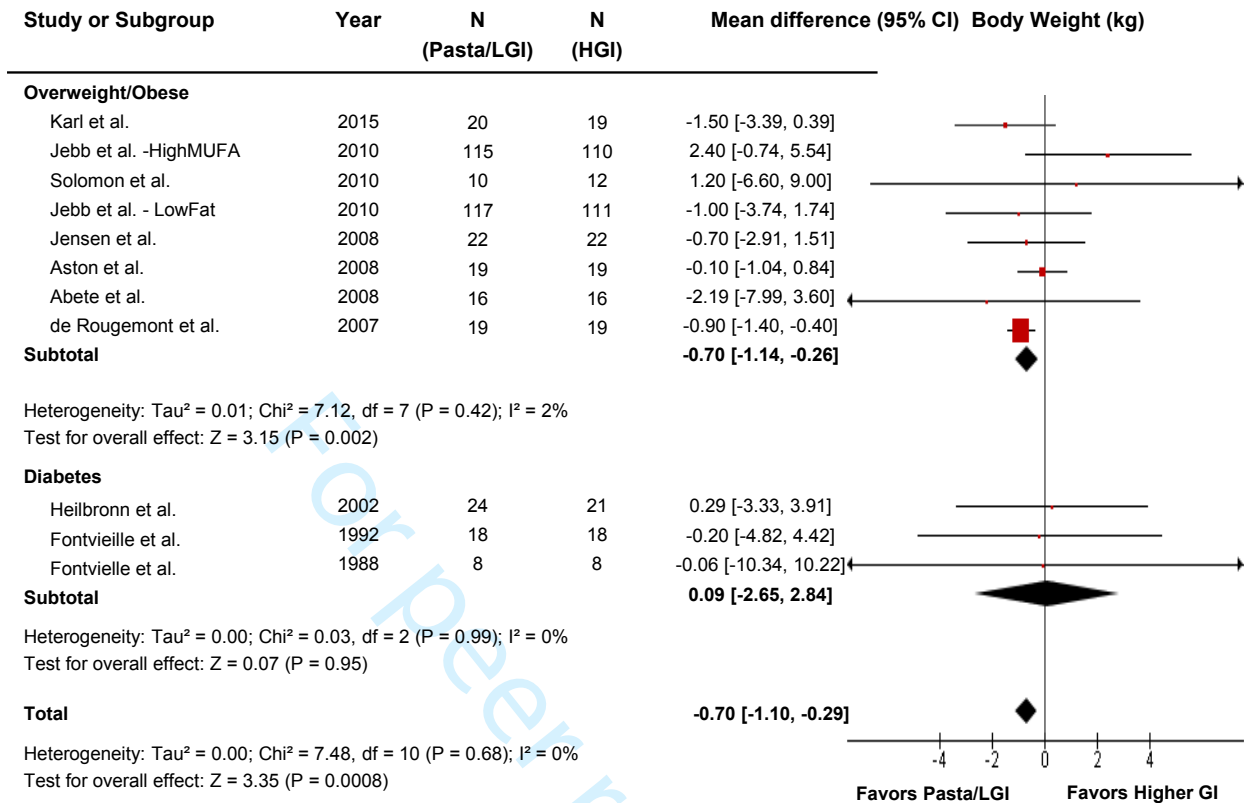

### Supplemental Figure S9: Forest plot of randomized controlled trials which contain data for approximating pasta intake which are investigating the effects of pasta in the context of low-GI dietary patterns on body weight (kg) (n = 740)

Data are expressed as mean differences represented by a square and 95% CIs by the line through the square. 95% CIs exceeding the plot's bounds are represented by an arrowhead. Pooled effect estimates are represented by diamonds and were estimated with the use of generic inverse variance random effects models. Between-study heterogeneity was detected with the use of the Cochran's Q statistic at a significance level of  $P < 0.10$  and quantified with the use of the  $I^2$  statistic where  $I^2 \geq 50\%$  is considered to be evidence of substantial heterogeneity and  $\geq 75\%$  considerable heterogeneity.

CI, confidence interval; HGI, higher glycemic index diet; GI, glycemic index; LGI, low glycemic index diet; MUFA, monounsaturated fatty acids

1  
2  
3  
4  
5  
6  
7  
8  
9  
10  
11  
12  
13  
14  
15  
16  
17  
18  
19  
20  
21  
22  
23  
24  
25  
26  
27  
28  
29  
30  
31  
32  
33  
34  
35  
36  
37  
38  
39  
40  
41  
42  
43  
44  
45  
46  
47

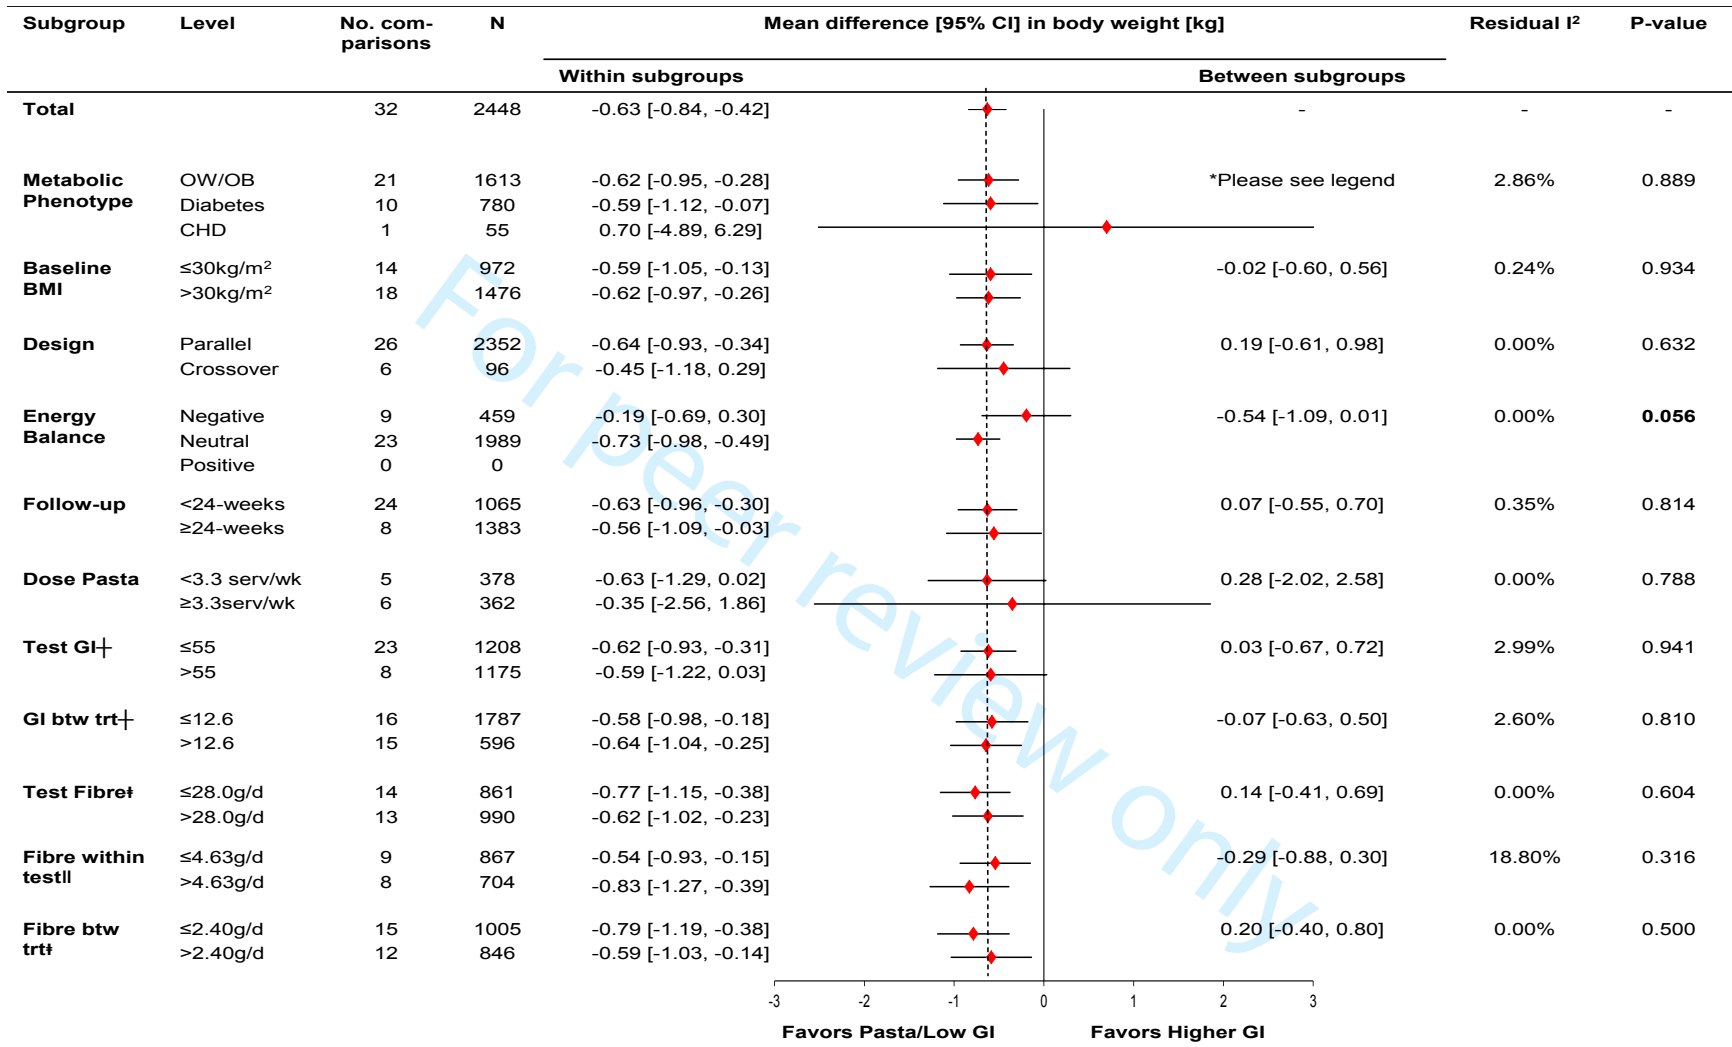

Supplemental Figure S10: Subgroup analysis for mean differences (95% CIs) of the effects of pasta in the context of low-GI dietary patterns on body weight (kg) (n = 2448)

1  
2  
3 The dashed line represents the pooled estimate for the overall primary analysis of pasta in the context of low-GI dietary patterns on  
4 body weight. Within subgroup mean differences are the pooled effect estimates represented by a diamond. 95% CIs are represented by  
5 the line through the square. The residual  $I^2$  was estimated with the use of the Cochran's Q statistic and indicates the between study  
6 heterogeneity unexplained by the variability in response because of the specific between studies factor.  $P < 0.05$  indicated that the  
7 effect size differed between levels of the subgroup. Within and between-treatment changes were categorically assessed based on the  
8 median intakes.  
9

10  
11 BMI, body mass index; btw, between; CHD, coronary heart disease; CI, confidence interval; GI, glycemic index (glucose scale); OB,  
12 obese; OW, overweight; serv, serving; trt, treatment; wk, week.  
13

14  
15 \*Pairwise between-subgroup mean differences (95% CIs) for Metabolic Phenotype were as follows: 0.02kg (-0.08, 0.65) (1 vs. 2) to  
16 1.32kg (-4.28, 6.91) (1 vs. 3) to -1.29kg (-6.91, 4.32) (2 vs. 3).

17 † data available on 31 studies

18 ‖ data available on 17 studies

19 ‡ data available on 27 studies  
20  
21  
22  
23  
24  
25  
26  
27  
28  
29  
30  
31  
32  
33  
34  
35  
36  
37  
38  
39  
40  
41  
42  
43  
44  
45  
46  
47

1  
2  
3  
4  
5  
6  
7  
8  
9  
10  
11  
12  
13  
14  
15  
16  
17  
18  
19  
20  
21  
22  
23  
24  
25  
26  
27  
28  
29  
30  
31  
32  
33  
34  
35  
36  
37  
38  
39  
40  
41  
42  
43  
44  
45  
46  
47

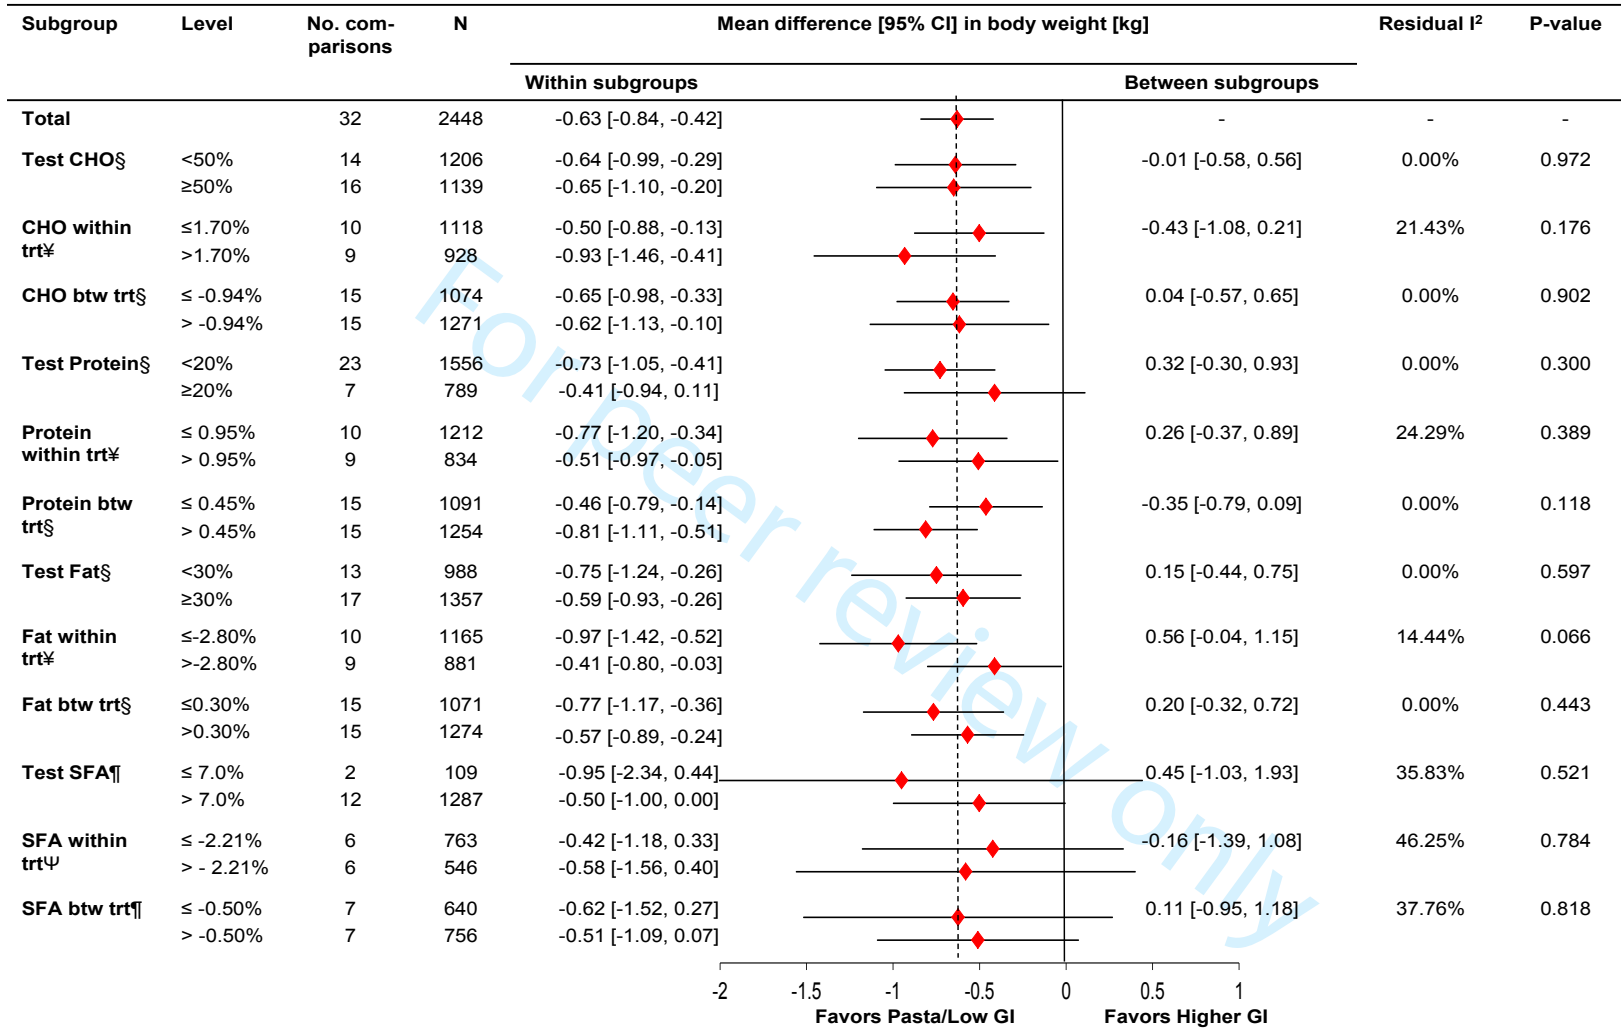

Supplemental Figure S11: Subgroup analysis for mean differences (95% CIs) of the effects of pasta in the context of low-GI dietary patterns on body weight (kg) continued (n = 2448)

1  
2  
3 The dashed line represents the pooled estimate for the overall primary analysis of pasta in the context of low-GI dietary patterns on  
4 body weight. Within subgroup mean differences are the pooled effect estimates represented by a diamond. 95% CIs are represented by  
5 the line through the square. The residual  $I^2$  was estimated with the use of the Cochran's Q statistic and indicates the between study  
6 heterogeneity unexplained by the variability in response because of the specific between studies factor.  $P < 0.05$  indicated that the  
7 effect size differed between levels of the subgroup. Within and between-treatment changes were categorically assessed based on the  
8 median intakes.  
9

10  
11 BMI, body mass index; btw, between; CI, confidence interval; GI, glycemic index (glucose scale); trt, treatment.

12 § data available on 30 studies

13 ¥ data available on 19 studies

14 ¶ data available on 14 studies

15 Ψ data available on 12 studies  
16  
17  
18  
19  
20  
21  
22  
23  
24  
25  
26  
27  
28  
29  
30  
31  
32  
33  
34  
35  
36  
37  
38  
39  
40  
41  
42  
43  
44  
45  
46  
47

1  
2  
3  
4  
5  
6  
7  
8  
9  
10  
11  
12  
13  
14  
15  
16  
17  
18  
19  
20  
21  
22  
23  
24  
25  
26  
27  
28  
29  
30  
31  
32  
33  
34  
35  
36  
37  
38  
39  
40  
41  
42  
43  
44  
45  
46  
47

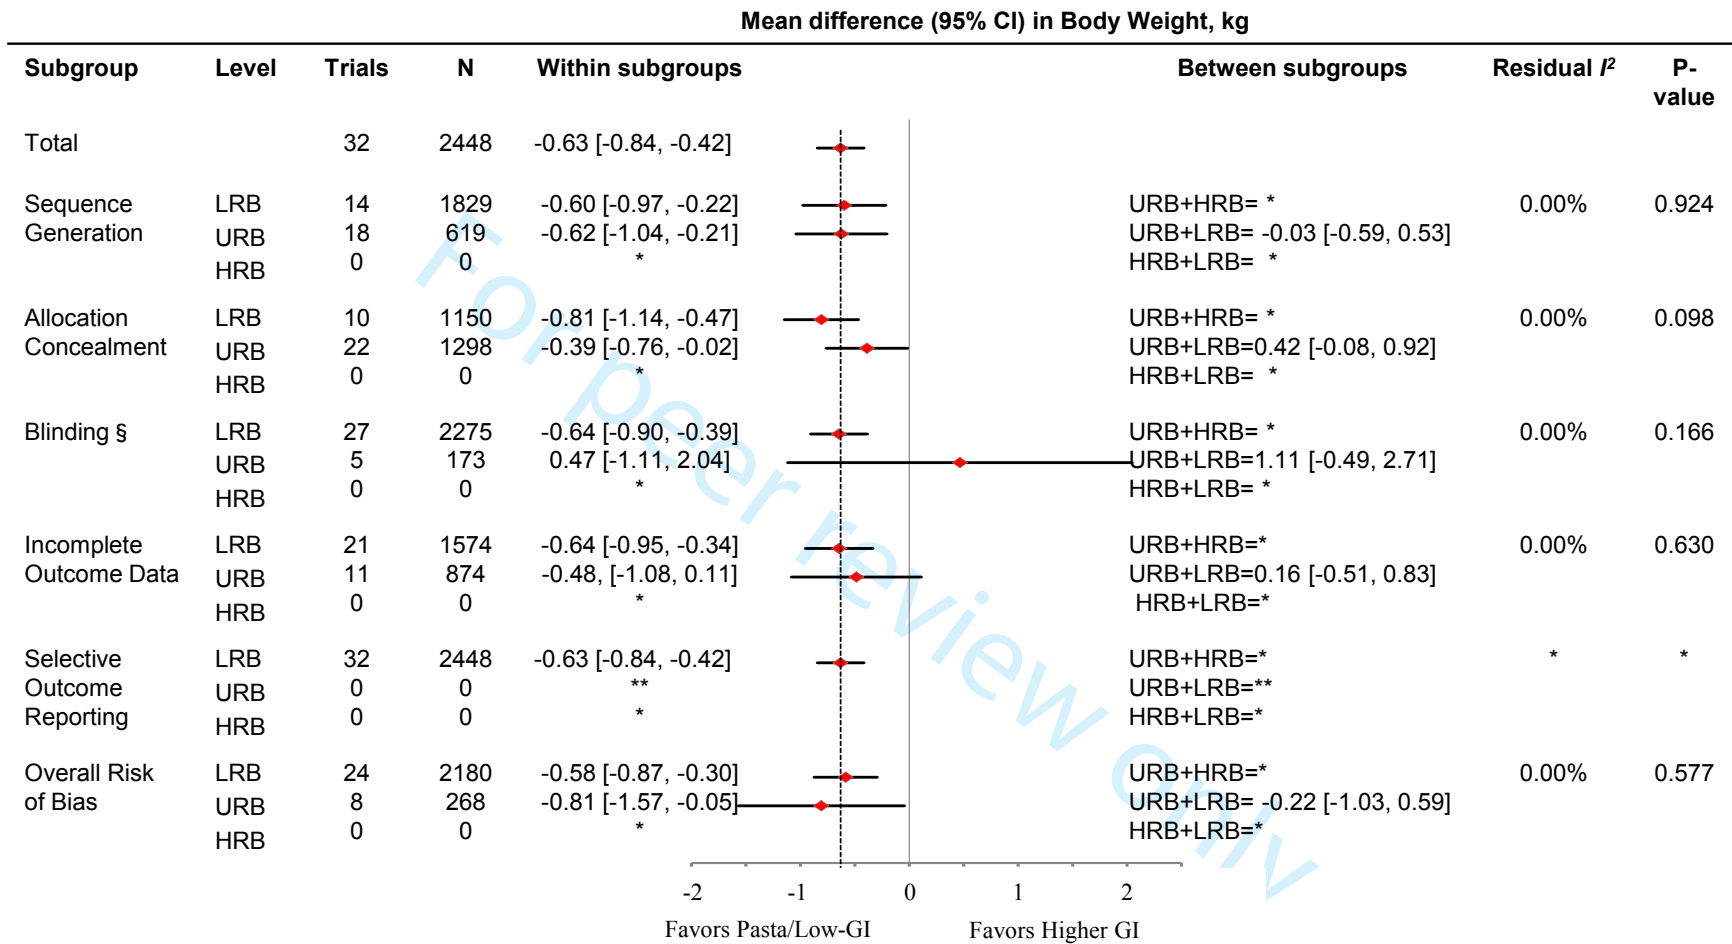

**Supplemental Figure S12: A priori subgroup analyses on risk of bias for mean differences (95% CIs) of the effect of pasta in the context of low-GI dietary patterns on body weight (kg) (n = 2448)**



1  
2  
3 The dashed line represents the pooled estimate for the overall primary analysis of pasta in the context of low-GI dietary patterns on  
4 body weight. Within subgroup mean differences are the pooled effect estimates represented by a diamond. 95% CIs are represented by  
5 the line through the square. The residual  $I^2$  was estimated with the use of the Cochran's Q statistic and indicates the between study  
6 heterogeneity unexplained by the variability in response because of the specific between studies factor.  $P < 0.05$  indicated that the  
7 effect size differed between levels of the subgroup.  
8  
9

10 LRB=Low Risk of Bias, URB= Unclear Risk of Bias, HRB=High Risk of Bias. \*Within and between subgroup analysis could not be  
11 performed against HRB since no values for HRB subgroup. \*\* no values for URB subgroup. § Blinding of Participants, Personnel,  
12 and Outcome Assessors.  
13  
14  
15  
16  
17  
18  
19  
20  
21  
22  
23  
24  
25  
26  
27  
28  
29  
30  
31  
32  
33  
34  
35  
36  
37  
38  
39  
40  
41  
42  
43  
44  
45  
46  
47

1  
2  
3  
4  
5  
6  
7  
8  
9  
10  
11  
12  
13  
14  
15  
16  
17  
18  
19  
20  
21  
22  
23  
24  
25  
26  
27  
28  
29  
30  
31  
32  
33  
34  
35  
36  
37  
38  
39  
40  
41  
42  
43  
44  
45  
46  
47

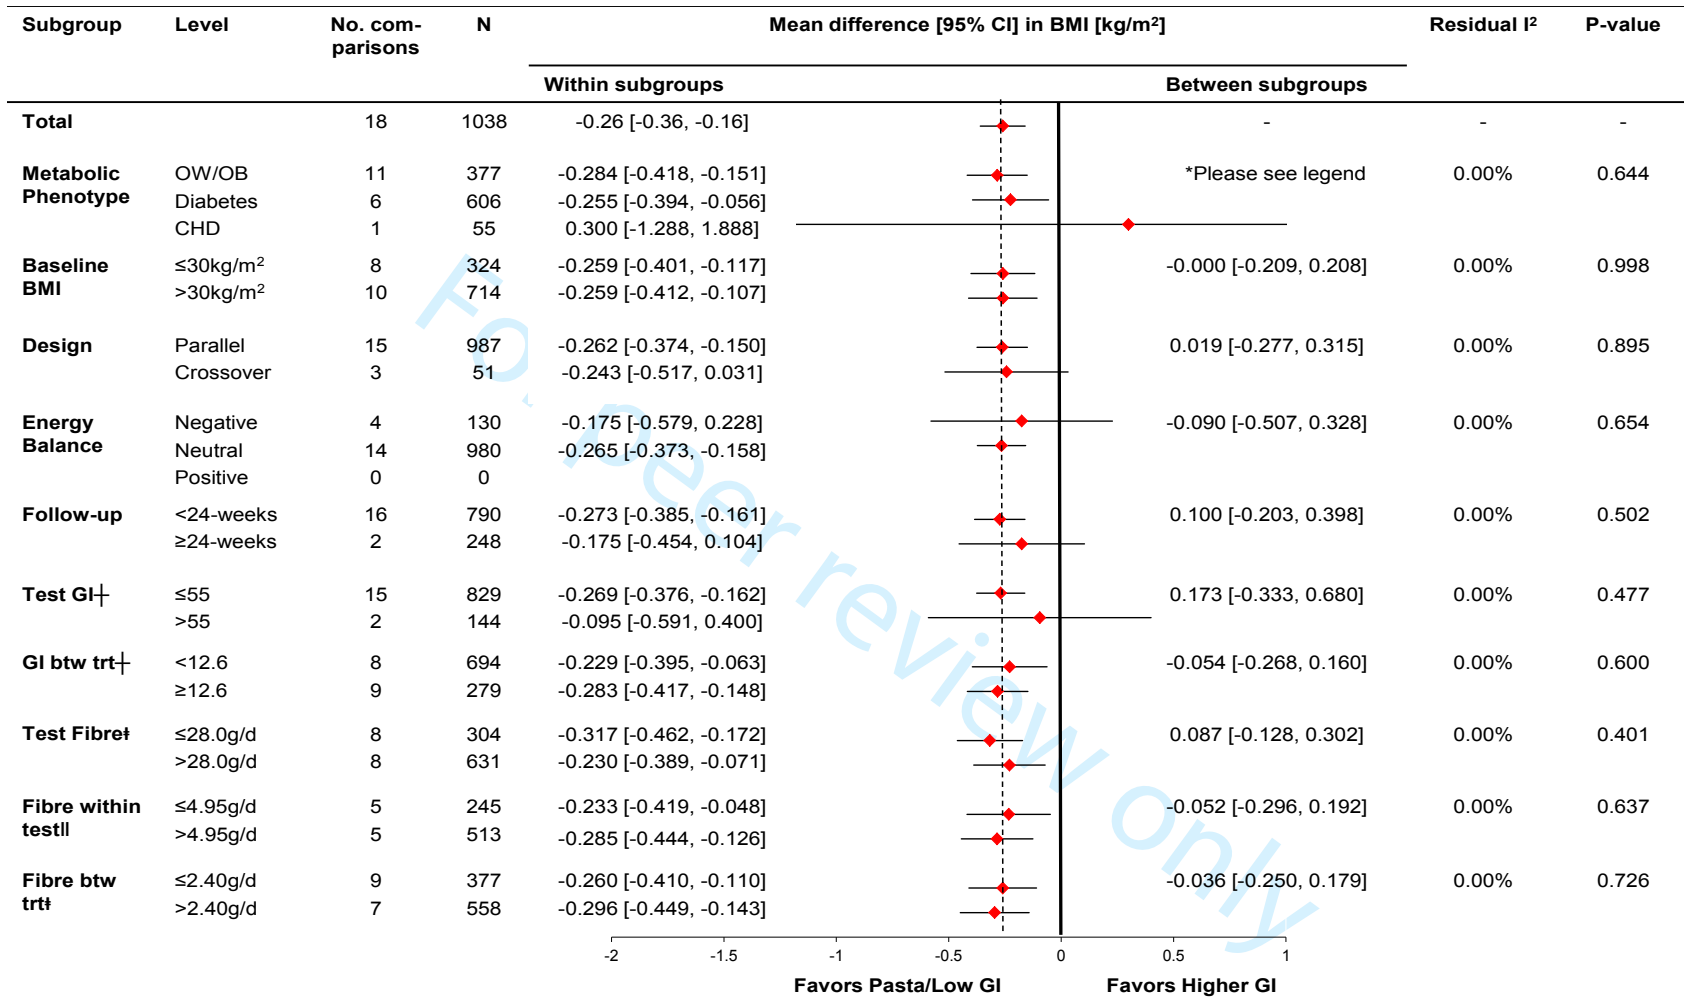

**Supplemental Figure S13: Subgroup analysis for mean differences (95% CIs) of the effects of pasta in the context of low-GI dietary patterns on body mass index, BMI (kg/m<sup>2</sup>) (n = 1038)**

The dashed line represents the pooled estimate for the overall primary analysis of pasta in the context of low-GI dietary patterns on BMI. Within subgroup mean differences are the pooled effect estimates represented by a diamond. 95% CIs are represented by the line through the square. The residual I<sup>2</sup> was estimated with the use of the Cochran’s Q statistic and indicates the between study

1  
2  
3 heterogeneity unexplained by the variability in response because of the specific between studies factor.  $P < 0.05$  indicated that the  
4 effect size differed between levels of the subgroup. Within and between-treatment changes were categorically assessed based on the  
5 median intakes. There were less than 10 trials available for categorical subgroup assessment for dose (n=3 trials), therefore analyses  
6 were not performed.  
7  
8

9 \*Pairwise between-subgroup mean differences (95% CIs) for Metabolic Phenotype were as follows:  $0.059\text{kg/m}^2$  (-0.156, 0.274) (1 vs.  
10 2) to  $0.584\text{kg/m}^2$  (-1.009, 2.178) (1 vs. 3) to  $-0.525\text{kg/m}^2$  (-2.122, 1.072) (2 vs. 3).  
11

12 † data available on 17 studies

13 ‡ data available on 16 studies

14 § data available on 10 studies  
15

16 BMI, body mass index; btw, between; CI, confidence interval; GI, glycemic index (glucose scale); OB, obese; OW, overweight; trt,  
17 treatment.  
18  
19  
20  
21  
22  
23  
24  
25  
26  
27  
28  
29  
30  
31  
32  
33  
34  
35  
36  
37  
38  
39  
40  
41  
42  
43  
44  
45  
46  
47

1  
2  
3  
4  
5  
6  
7  
8  
9  
10  
11  
12  
13  
14  
15  
16  
17  
18  
19  
20  
21  
22  
23  
24  
25  
26  
27  
28  
29  
30  
31  
32  
33  
34  
35  
36  
37  
38  
39  
40  
41  
42  
43  
44  
45  
46  
47

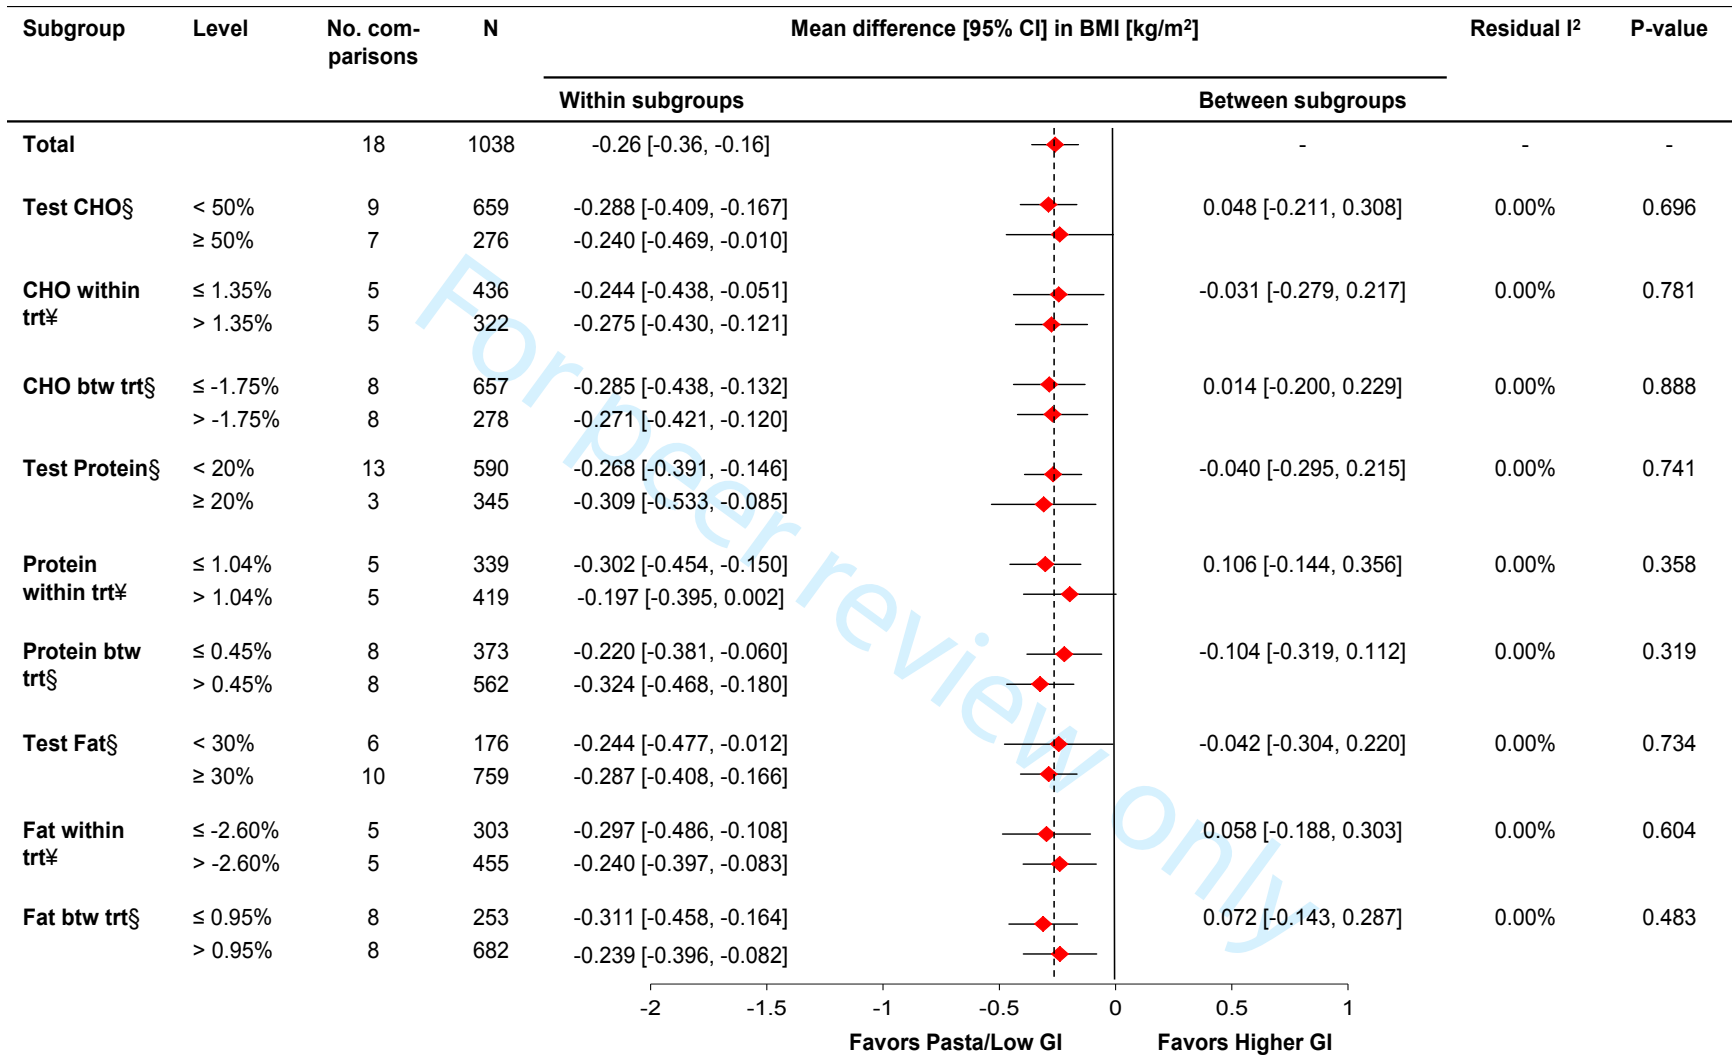

**Supplemental Figure S14: Subgroup analysis for mean differences (95% CIs) of the effects of pasta in the context of low-GI dietary patterns on body mass index, BMI (kg/m<sup>2</sup>) continued (n = 1038)**

1  
2  
3 The dashed line represents the pooled estimate for the overall primary analysis of pasta in the context of low-GI dietary patterns on  
4 BMI. Within subgroup mean differences are the pooled effect estimates represented by a diamond. 95% CIs are represented by the line  
5 through the square. The residual  $I^2$  was estimated with the use of the Cochran's Q statistic and indicates the between study  
6 heterogeneity unexplained by the variability in response because of the specific between studies factor.  $P < 0.05$  indicated that the  
7 effect size differed between levels of the subgroup. Within and between-treatment changes were categorically assessed based on the  
8 median intakes. There were less than 10 trials available for categorical subgroup assessment for test saturated fat (n=7 trials), saturated  
9 fat within treatment (n=6 trials) and saturated fat between treatments (n=7 trials), therefore analyses were not performed.

10  
11 § data available on 16 studies

12 ¥ data available on 10 studies  
13

14  
15 BMI, body mass index; btw, between; CHO, carbohydrate; CI = confidence interval; GI, glycemic index (glucose scale); trt, treatment.  
16  
17  
18  
19  
20  
21  
22  
23  
24  
25  
26  
27  
28  
29  
30  
31  
32  
33  
34  
35  
36  
37  
38  
39  
40  
41  
42  
43  
44  
45  
46  
47

1  
2  
3  
4  
5  
6  
7  
8  
9  
10  
11  
12  
13  
14  
15  
16  
17  
18  
19  
20  
21  
22  
23  
24  
25  
26  
27  
28  
29  
30  
31  
32  
33  
34  
35  
36  
37  
38  
39  
40  
41  
42  
43  
44  
45  
46  
47

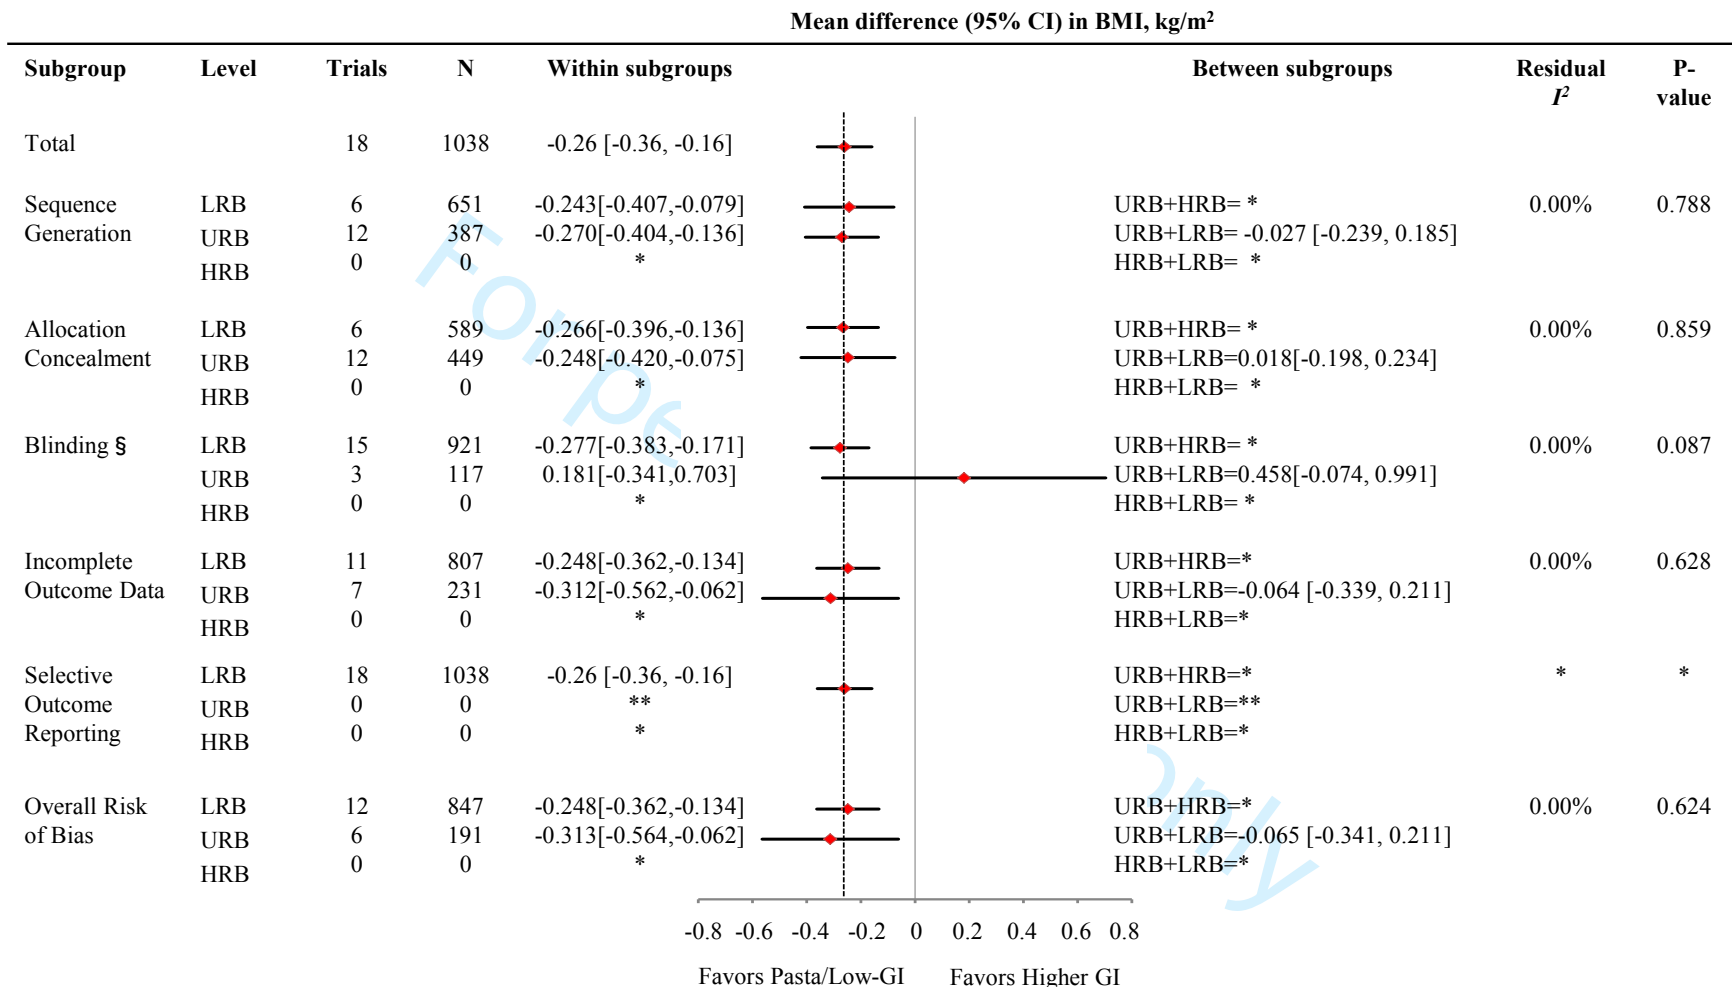

**Supplemental Figure S15: A priori subgroup analyses on risk of bias for mean differences (95% CIs) of the effect of pasta in the context of low-GI dietary patterns on body mass index, BMI (kg/m<sup>2</sup>) (n = 1038)**

1  
2  
3 The dashed line represents the pooled estimate for the overall primary analysis of pasta in the context of low-GI dietary patterns on  
4 BMI. Within subgroup mean differences are the pooled effect estimates represented by a diamond. 95% CIs are represented by the line  
5 through the square. The residual  $I^2$  was estimated with the use of the Cochran's Q statistic and indicates the between study  
6 heterogeneity unexplained by the variability in response because of the specific between studies factor.  $P < 0.05$  indicated that the  
7 effect size differed between levels of the subgroup.  
8  
9

10 \*Within and between subgroup analyses could not be performed against HRB since no values for HRB subgroup.

11 \*\* no values for URB subgroup.

12 § Blinding of Participants, Personnel, and Outcome Assessors.

13  
14  
15 BMI, body mass index; CI, confidence interval; HRB, High Risk of Bias; GI, glycemic index; LRB, Low Risk of Bias; URB, Unclear  
16 Risk of Bias.  
17  
18  
19  
20  
21  
22  
23  
24  
25  
26  
27  
28  
29  
30  
31  
32  
33  
34  
35  
36  
37  
38  
39  
40  
41  
42  
43  
44  
45  
46  
47

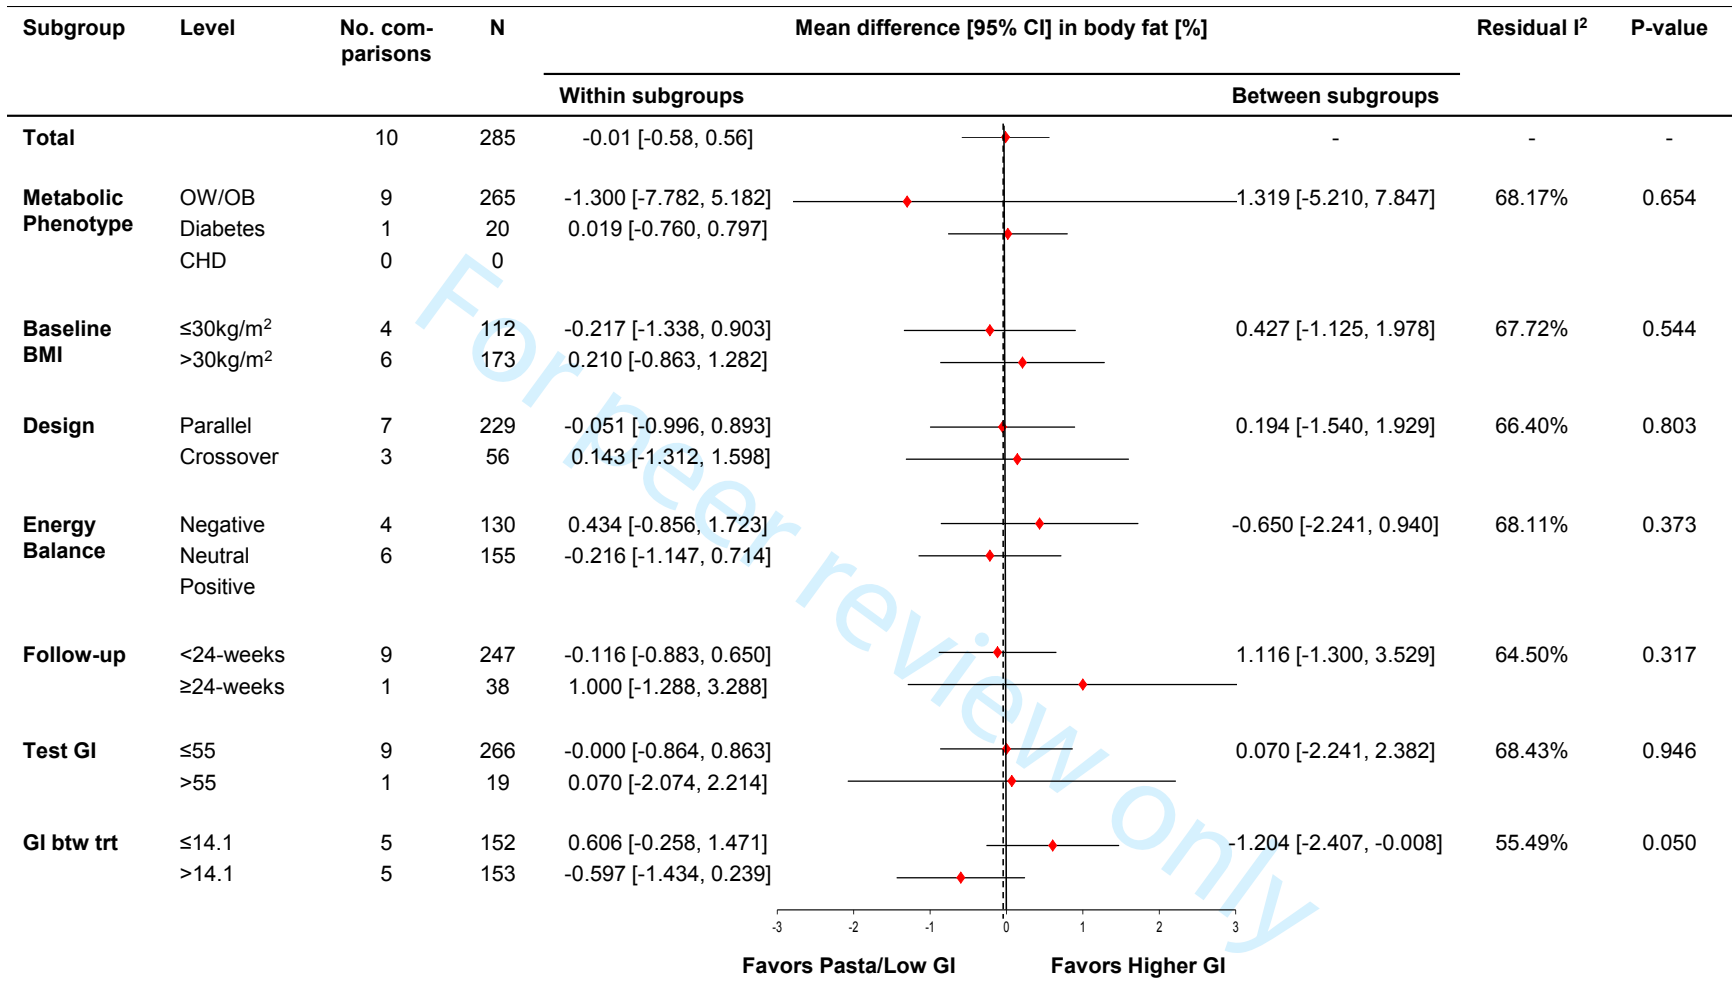

Supplemental Figure S16: Subgroup analysis for mean differences (95% CIs) of the effects of pasta in the context of low-GI dietary patterns on body fat (%) (n = 285)



1  
2  
3 The dashed line represents the pooled estimate for the overall primary analysis of pasta in the context of low-GI dietary patterns on  
4 body fat. Within subgroup mean differences are the pooled effect estimates represented by a diamond. 95% CIs are represented by the  
5 line through the square. The residual  $I^2$  was estimated with the use of the Cochran's Q statistic and indicates the between study  
6 heterogeneity unexplained by the variability in response because of the specific between studies factor.  $P < 0.05$  indicated that the  
7 effect size differed between levels of the subgroup. Within and between-treatment changes were categorically assessed based on the  
8 median intakes. There were less than 10 trials available for categorical subgroup assessment for dose (n=3), test carbohydrate, protein  
9 and fat (n=9), carbohydrate, protein and fat within treatment (n=4), carbohydrate, protein and fat between treatment (n=9), test fibre  
10 (n=8), fibre within treatment (n=4), fibre between treatment (n=8), test saturated fat (n=3 trials), saturated fat within treatment (n=2  
11 trials) and saturated fat between treatments (n=3 trials), therefore analyses were not performed.  
12  
13  
14  
15

16 BMI, body mass index; btw, between; CHO, carbohydrate; CI = confidence interval; GI, glycemic index (glucose scale); OB, obese;  
17 OW, overweight; trt, treatment.  
18  
19  
20  
21  
22  
23  
24  
25  
26  
27  
28  
29  
30  
31  
32  
33  
34  
35  
36  
37  
38  
39  
40  
41  
42  
43  
44  
45  
46  
47

1  
2  
3  
4  
5  
6  
7  
8  
9  
10  
11  
12  
13  
14  
15  
16  
17  
18  
19  
20  
21  
22  
23  
24  
25  
26  
27  
28  
29  
30  
31  
32  
33  
34  
35  
36  
37  
38  
39  
40  
41  
42  
43  
44  
45  
46  
47

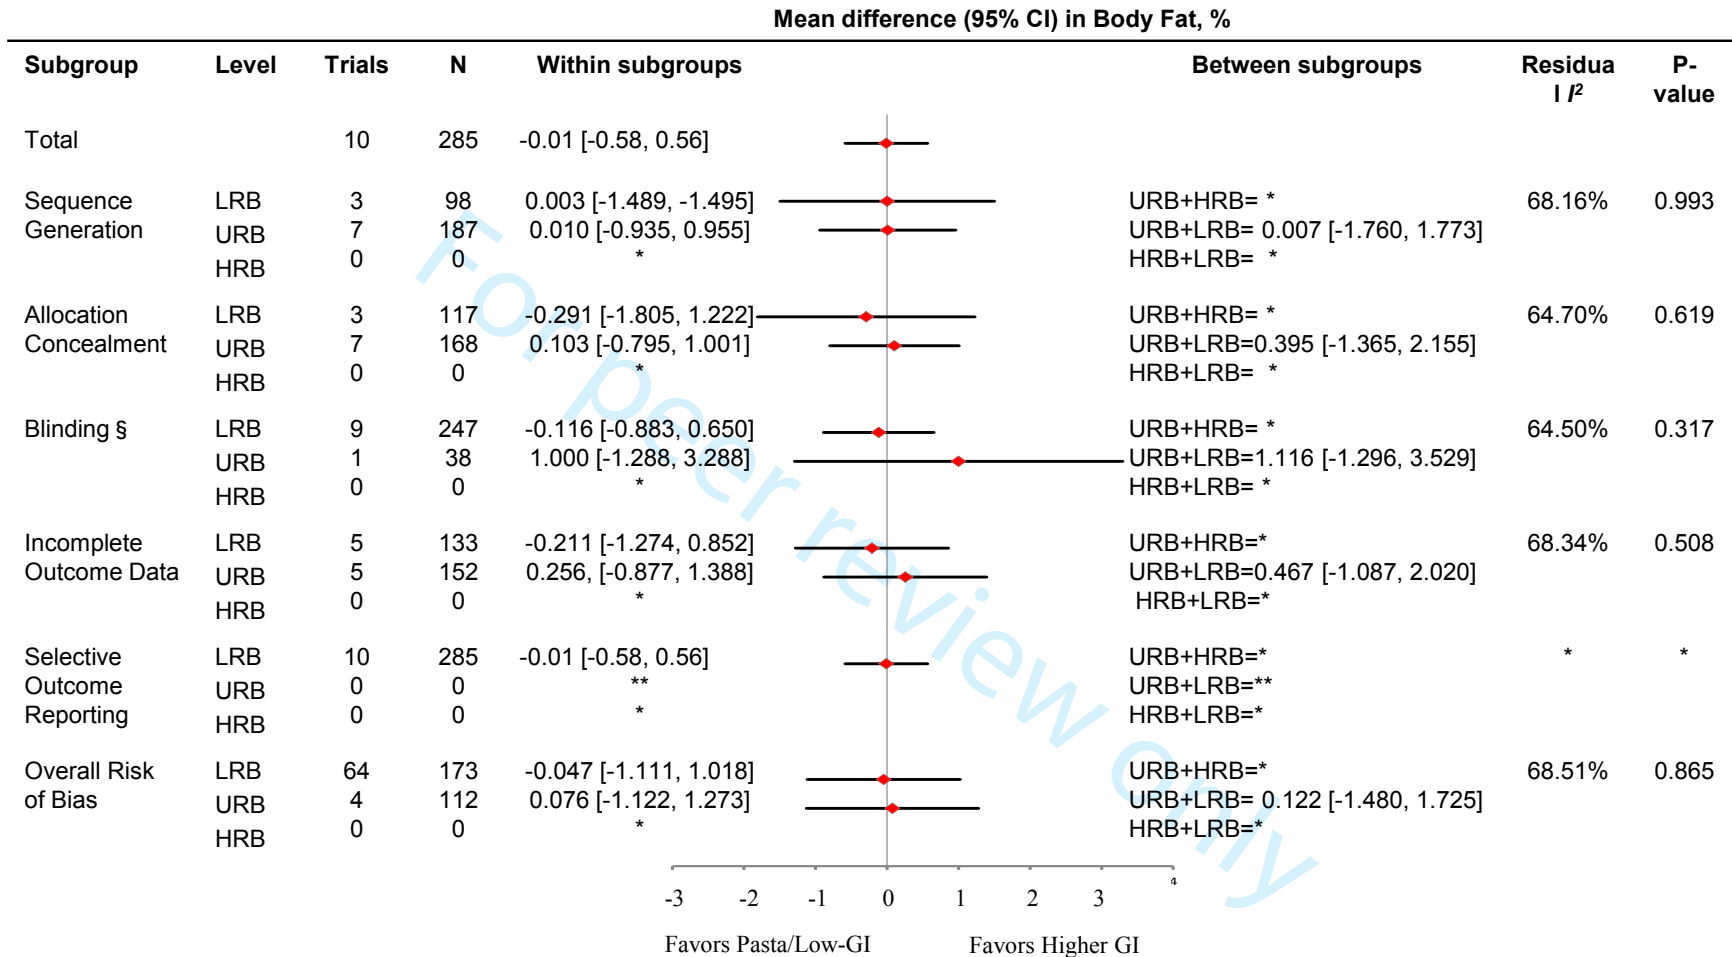

**Supplemental Figure S17: A priori subgroup analyses on risk of bias for mean differences (95% CIs) of the effect of pasta in the context of low-GI dietary patterns on body fat (%) (n = 285)**

1  
2  
3 The dashed line represents the pooled estimate for the overall primary analysis of pasta in the context of low-GI dietary patterns on  
4 body fat. Within subgroup mean differences are the pooled effect estimates represented by a diamond. 95% CIs are represented by the  
5 line through the square. The residual  $I^2$  was estimated with the use of the Cochran's Q statistic and indicates the between study  
6 heterogeneity unexplained by the variability in response because of the specific between studies factor.  $P < 0.05$  indicated that the  
7 effect size differed between levels of the subgroup.  
8  
9

10 \*Within and between subgroup analyses could not be performed against HRB since no values for HRB subgroup.

11 \*\* no values for URB subgroup.

12 § Blinding of Participants, Personnel, and Outcome Assessors.  
13  
14

15 CI, confidence interval; HRB, High Risk of Bias; GI, glycemic index; LRB, Low Risk of Bias; URB, Unclear Risk of Bias  
16  
17  
18  
19  
20  
21  
22  
23  
24  
25  
26  
27  
28  
29  
30  
31  
32  
33  
34  
35  
36  
37  
38  
39  
40  
41  
42  
43  
44  
45  
46  
47

1  
2  
3  
4  
5  
6  
7  
8  
9  
10  
11  
12  
13  
14  
15  
16  
17  
18  
19  
20  
21  
22  
23  
24  
25  
26  
27  
28  
29  
30  
31  
32  
33  
34  
35  
36  
37  
38  
39  
40  
41  
42  
43  
44  
45  
46  
47

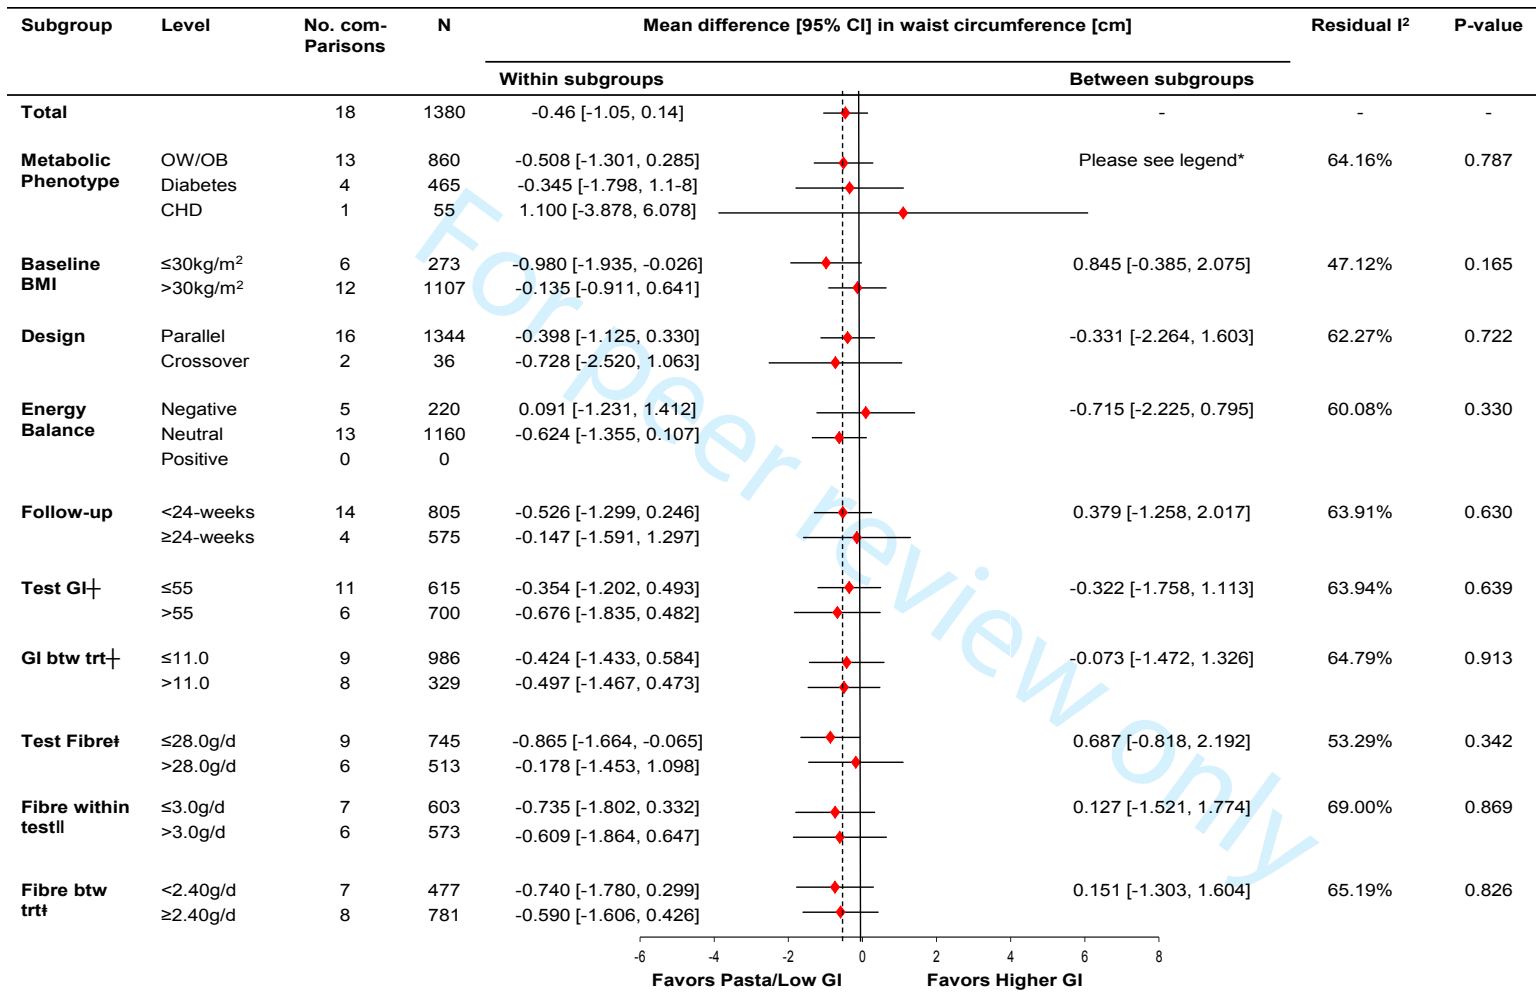

Supplemental Figure S18: Subgroup analysis for mean differences (95% CIs) of the effects of pasta in the context of low-GI dietary patterns on waist circumference (cm) (n = 1380)

1  
2  
3 The dashed line represents the pooled estimate for the overall primary analysis of pasta in the context of low-GI dietary patterns on  
4 waist circumference. Within subgroup mean differences are the pooled effect estimates represented by a diamond. 95% CIs are  
5 represented by the line through the square. The residual  $I^2$  was estimated with the use of the Cochran's Q statistic and indicates the  
6 between study heterogeneity unexplained by the variability in response because of the specific between studies factor.  $P < 0.05$   
7 indicated that the effect size differed between levels of the subgroup. Within and between-treatment changes were categorically  
8 assessed based on the median intakes. There were less than 10 trials available for categorical subgroup assessment for dose (n=2  
9 trials), therefore analyses were not performed.  
10  
11

12 \*Pairwise between-subgroup mean differences (95% CIs) for Metabolic Phenotype were as follows: 0.163cm (-1.492, 1.818) (1 vs. 2)  
13 to 1.608cm (-3.432, 6.648) (1 vs. 3) to -1.445cm (-6.630, 3.740) (2 vs. 3).

14 † data available on 17 studies

15 ‡ data available on 15 studies  
16  
17

18 BMI, body mass index; btw, between; CI = confidence interval; GI, glycemic index (glucose scale); OB, obese; OW, overweight; trt,  
19 treatment.  
20  
21  
22  
23  
24  
25  
26  
27  
28  
29  
30  
31  
32  
33  
34  
35  
36  
37  
38  
39  
40  
41  
42  
43  
44  
45  
46  
47

1  
2  
3  
4  
5  
6  
7  
8  
9  
10  
11  
12  
13  
14  
15  
16  
17  
18  
19  
20  
21  
22  
23  
24  
25  
26  
27  
28  
29  
30  
31  
32  
33  
34  
35  
36  
37  
38  
39  
40  
41  
42  
43  
44  
45  
46  
47

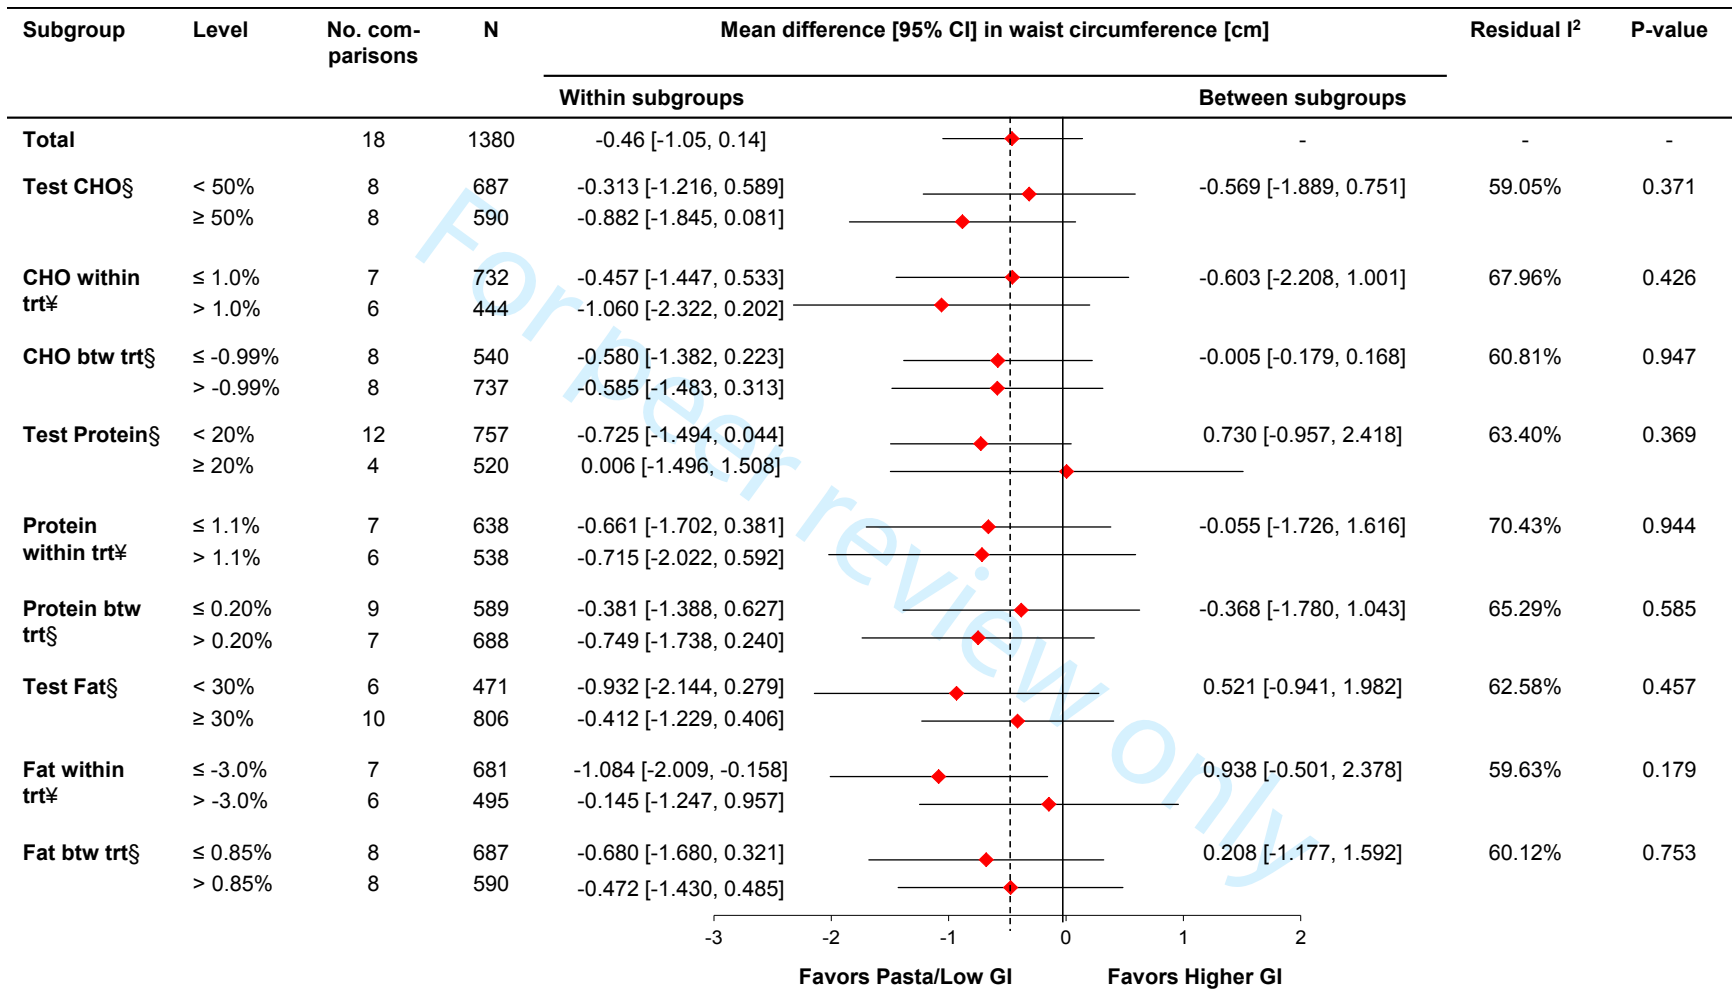

**Supplemental Figure S19: Subgroup analysis for mean differences (95% CIs) of the effects of pasta in the context of low-GI dietary patterns on waist circumference (cm) continued (n = 1380)**

1  
2  
3 The dashed line represents the pooled estimate for the overall primary analysis of pasta in the context of low-GI dietary patterns on  
4 waist circumference. Within subgroup mean differences are the pooled effect estimates represented by a diamond. 95% CIs are  
5 represented by the line through the square. The residual  $I^2$  was estimated with the use of the Cochran's Q statistic and indicates the  
6 between study heterogeneity unexplained by the variability in response because of the specific between studies factor.  $P < 0.05$   
7 indicated that the effect size differed between levels of the subgroup. Within and between-treatment changes were categorically  
8 assessed based on the median intakes. There were less than 10 trials available for categorical subgroup assessment for test saturated fat  
9 (n=8 trials), saturated fat within treatment (n=7 trials) and saturated fat between treatments (n=8 trials), therefore analyses were not  
10 performed.  
11  
12

13 § data available on 16 studies

14 ¥ data available on 13 studies

15  
16  
17 BMI, body mass index; btw, between; CHO, carbohydrate; CI = confidence interval; GI, glycemic index (glucose scale); trt, treatment.  
18  
19  
20  
21  
22  
23  
24  
25  
26  
27  
28  
29  
30  
31  
32  
33  
34  
35  
36  
37  
38  
39  
40  
41  
42  
43  
44  
45  
46  
47

1  
2  
3  
4  
5  
6  
7  
8  
9  
10  
11  
12  
13  
14  
15  
16  
17  
18  
19  
20  
21  
22  
23  
24  
25  
26  
27  
28  
29  
30  
31  
32  
33  
34  
35  
36  
37  
38  
39  
40  
41  
42  
43  
44  
45  
46  
47

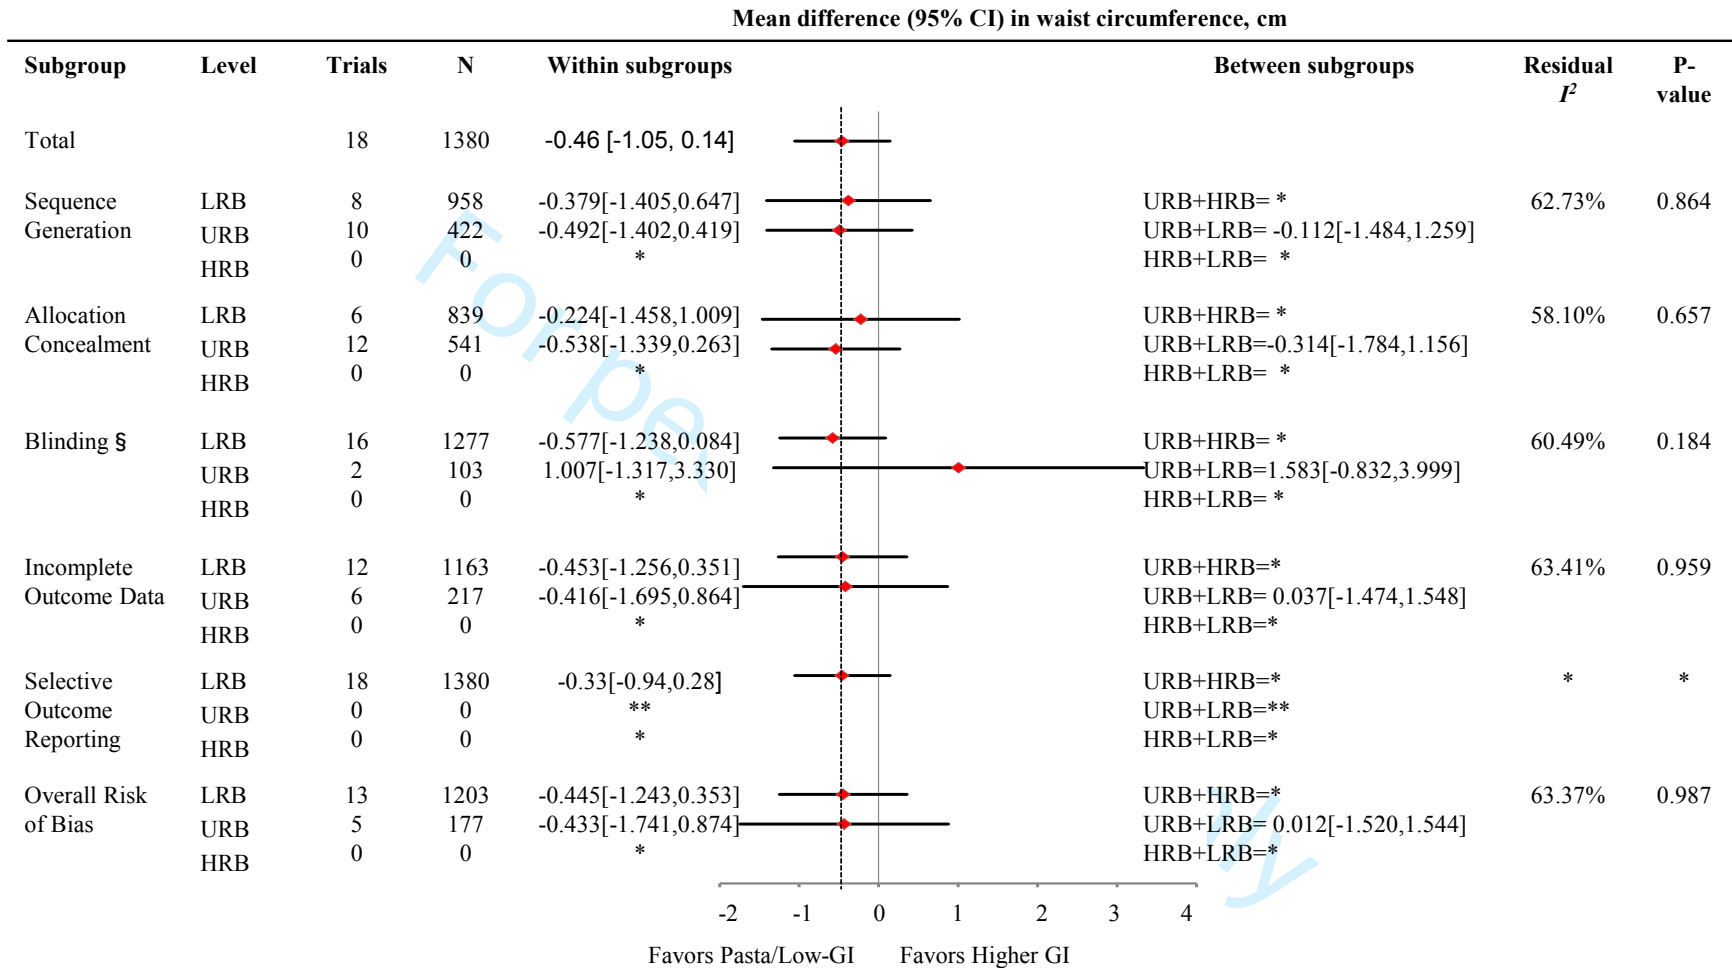

**Supplemental Figure S20: A priori subgroup analyses on risk of bias for mean differences (95% CIs) of the effect of pasta in the context of low-GI dietary patterns on waist circumference (cm) (n = 1380)**



1  
2  
3 The dashed line represents the pooled estimate for the overall primary analysis of pasta in the context of low-GI dietary patterns on  
4 waist circumference. Within subgroup mean differences are the pooled effect estimates represented by a diamond. 95% CIs are  
5 represented by the line through the square. The residual  $I^2$  was estimated with the use of the Cochran's Q statistic and indicates the  
6 between study heterogeneity unexplained by the variability in response because of the specific between studies factor.  $P < 0.05$   
7 indicated that the effect size differed between levels of the subgroup.  
8  
9

10 \*Within and between subgroup analyses could not be performed against HRB since no values for HRB subgroup.

11 \*\* no values for URB subgroup.

12 § Blinding of Participants, Personnel, and Outcome Assessors.

13  
14  
15 CI, confidence interval; HRB, High Risk of Bias; GI, glycemic index; LRB, Low Risk of Bias; URB, Unclear Risk of Bias  
16  
17  
18  
19  
20  
21  
22  
23  
24  
25  
26  
27  
28  
29  
30  
31  
32  
33  
34  
35  
36  
37  
38  
39  
40  
41  
42  
43  
44  
45  
46  
47

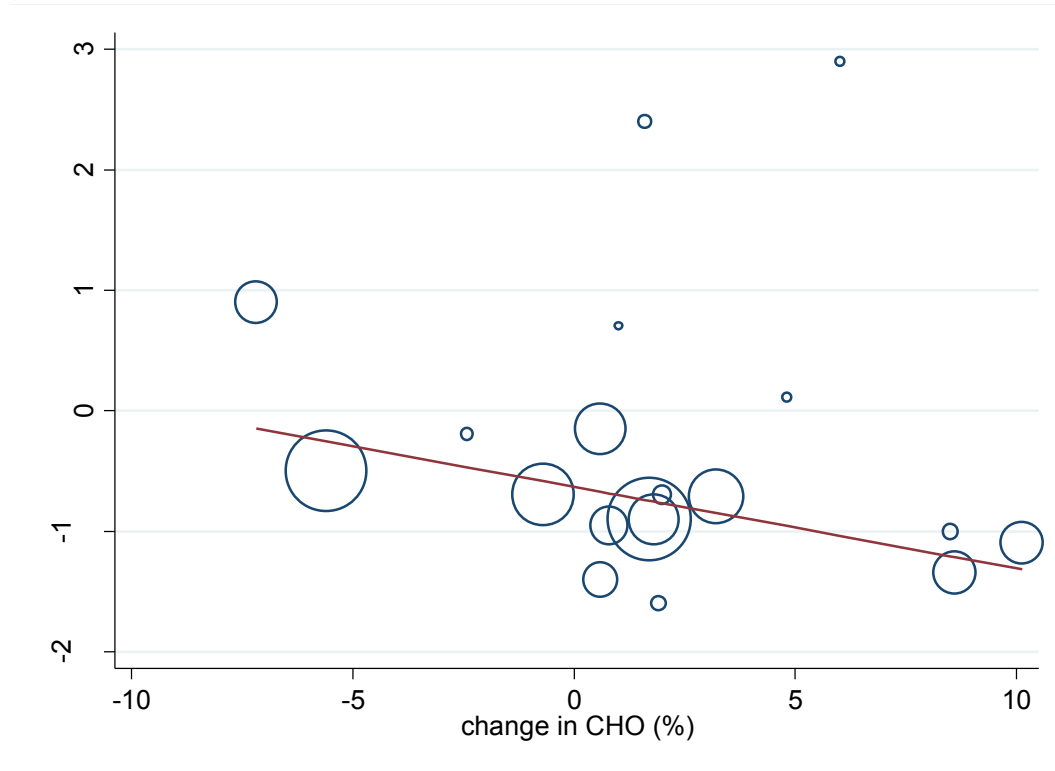

**Supplemental Figure S21: Continuous meta-regression of change in carbohydrate intake in the low-GI dietary pattern intervention arms with change in body weight (n=19)**  
CHO, carbohydrate; MD, mean difference

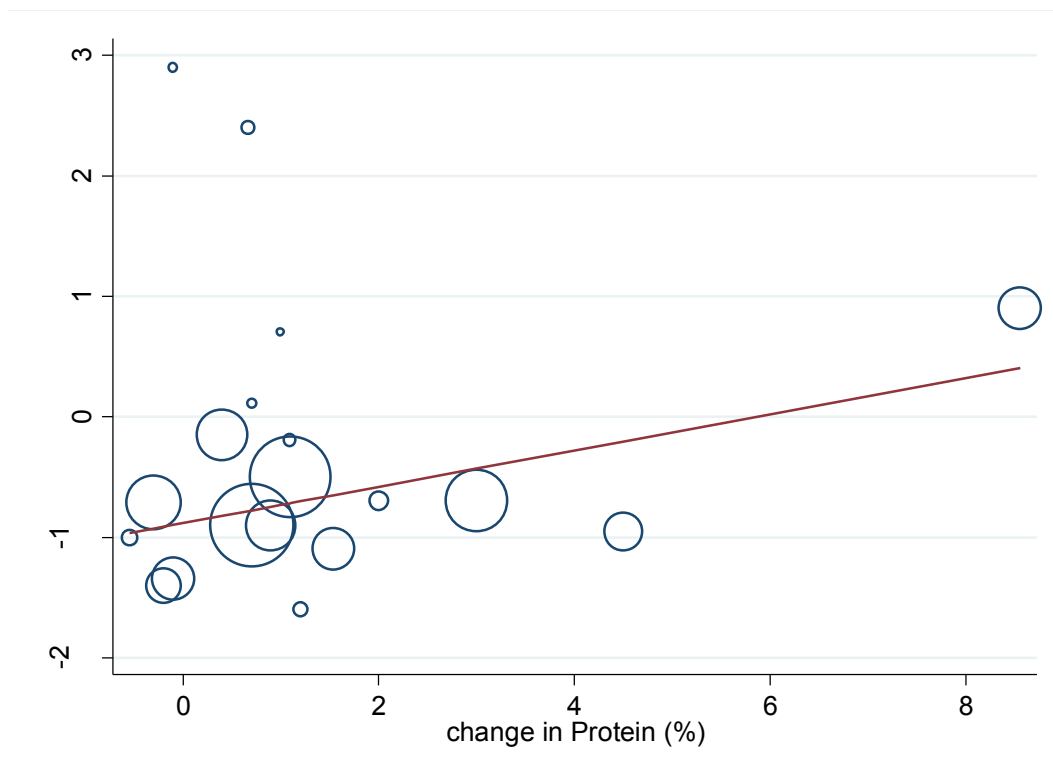

**Supplemental Figure S22: Continuous meta-regression of change in protein intake in the low-GI dietary pattern intervention arms with change in body weight (n=19)**  
 MD, mean difference

review only

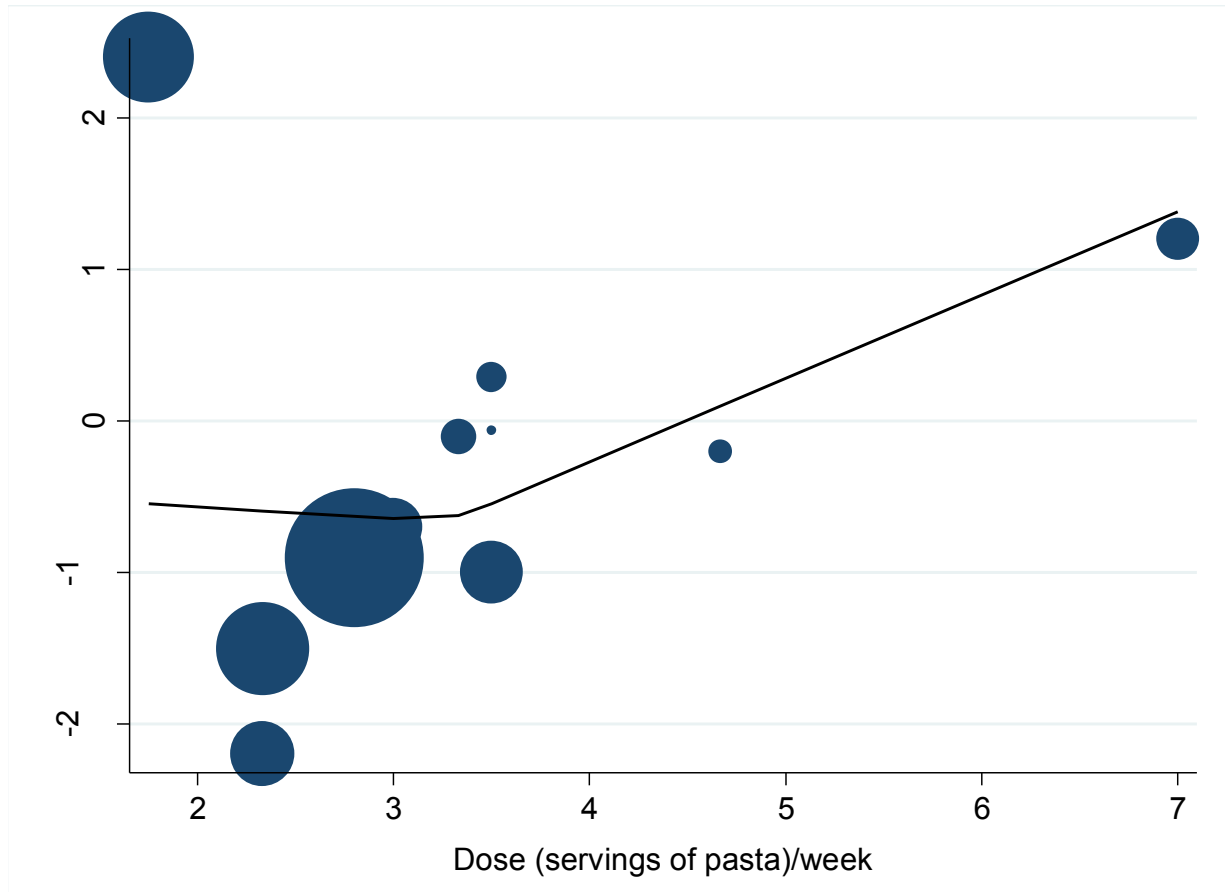

**Supplemental Figure S23: Pasta intake dose-response analyses by spline curve modeling (MKSPLINE procedure)**

view only

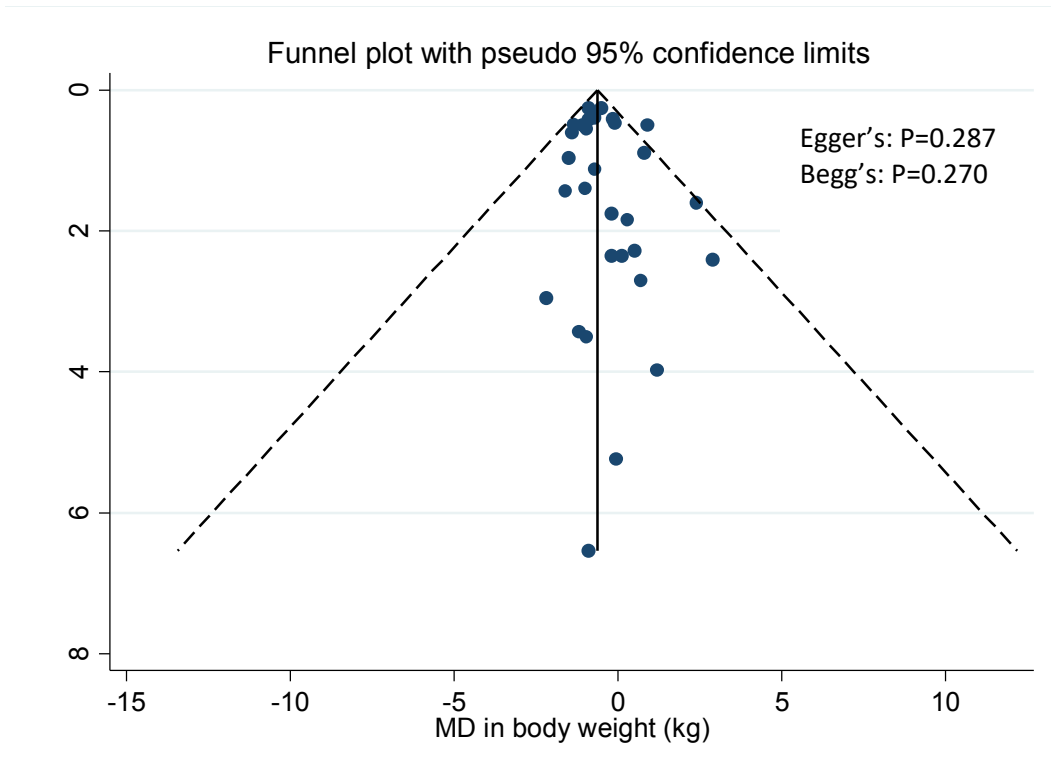

28  
29  
30

**Supplemental Figure S24: Funnel plot for the effect of pasta in the context of low-GI dietary patterns on body weight (kg)**

31  
32  
33  
34  
35  
36  
37  
38  
39  
40  
41  
42  
43  
44  
45  
46  
47  
48  
49  
50  
51  
52  
53  
54  
55  
56  
57  
58  
59  
60

The solid line represents the overall pooled estimate for all studies included in the meta-analysis expressed as a weighted mean difference. Dashed lines represent 95% CIs. P values are derived from the quantitative assessment of publication bias by Egger's and Begg's tests.

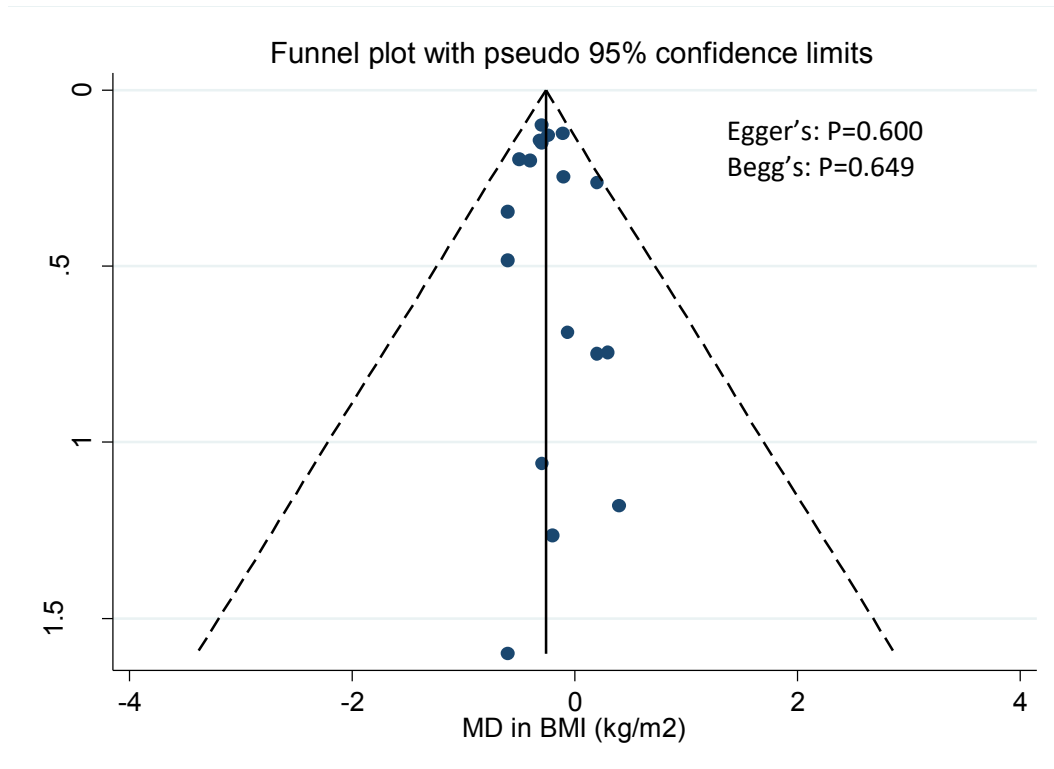

29 **Supplemental Figure S25: Funnel plot for the effect of pasta in the context of low-GI**  
30 **dietary patterns on BMI (kg/m<sup>2</sup>)**

31 The solid line represents the overall pooled estimate for all studies included in the meta-analysis  
32 expressed as a weighted mean difference. Dashed lines represent 95% CIs. P values are derived  
33 from the quantitative assessment of publication bias by Egger's and Begg's tests.  
34  
35  
36  
37  
38  
39  
40  
41  
42  
43  
44  
45  
46  
47  
48  
49  
50  
51  
52  
53  
54  
55  
56  
57  
58  
59  
60

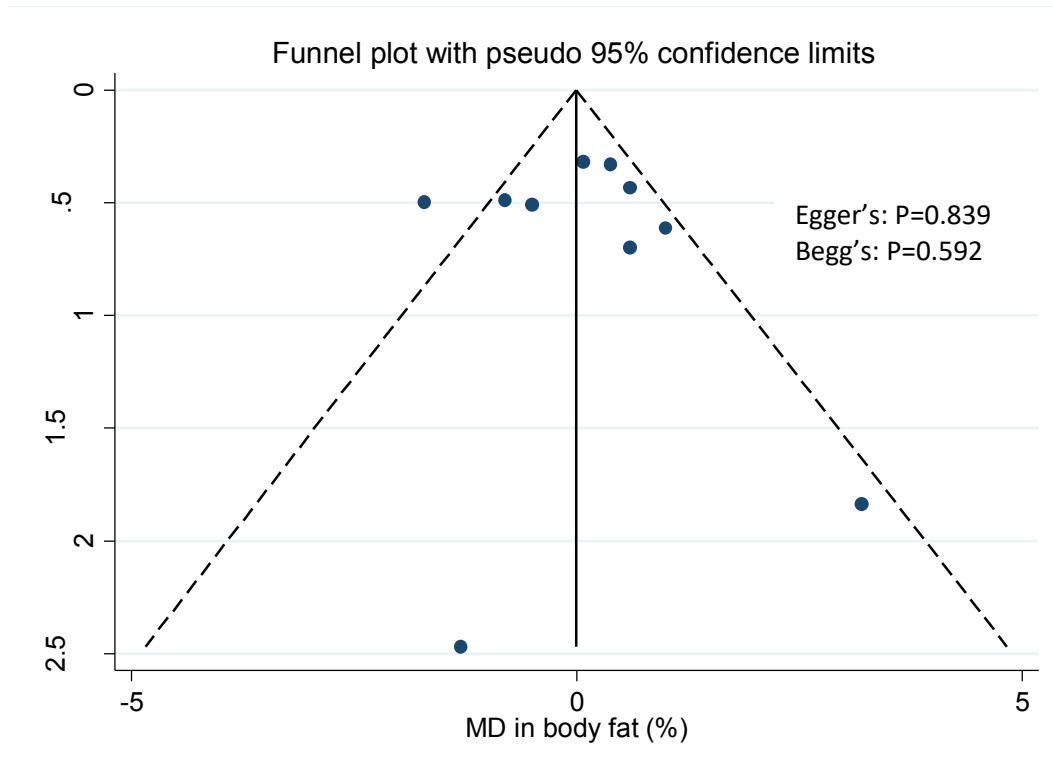

28  
29  
30  
31  
32

**Supplemental Figure S26: Funnel plot for the effect of pasta in the context of low-GI dietary patterns on body fat (%)**

33  
34  
35  
36  
37  
38  
39  
40  
41  
42  
43  
44  
45  
46  
47  
48  
49  
50  
51  
52  
53  
54  
55  
56  
57  
58  
59  
60

The solid line represents the overall pooled estimate for all studies included in the meta-analysis expressed as a weighted mean difference. Dashed lines represent 95% CIs. P values are derived from the quantitative assessment of publication bias by Egger's and Begg's tests.

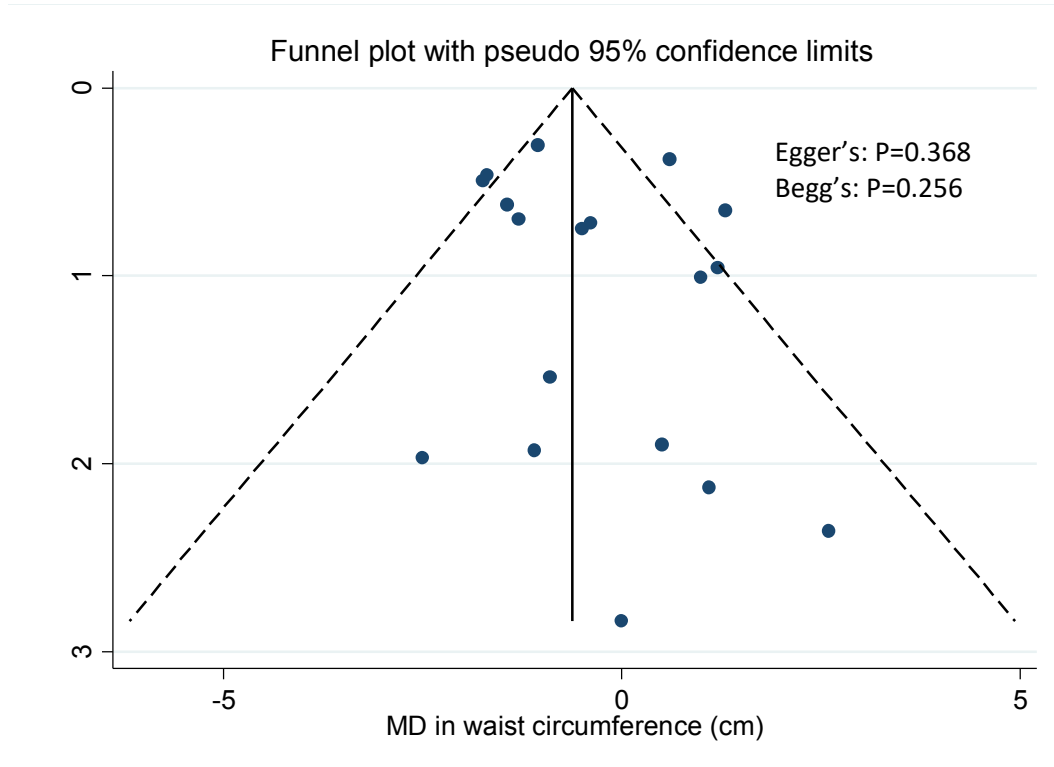

28  
29  
30  
31  
32

**Supplemental Figure S27: Funnel plot for the effect of pasta in the context of low-GI dietary patterns on waist circumference (cm)**

33  
34  
35  
36  
37  
38  
39  
40  
41  
42  
43  
44  
45  
46  
47  
48  
49  
50  
51  
52  
53  
54  
55  
56  
57  
58  
59  
60

The solid line represents the overall pooled estimate for all studies included in the meta-analysis expressed as a weighted mean difference. Dashed lines represent 95% CIs. P values are derived from the quantitative assessment of publication bias by Egger's and Begg's tests.



## Supplemental Table S1: PRISMA Checklist

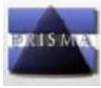

## PRISMA 2009 Checklist

| Section/topic             | #  | Checklist item                                                                                                                                                                                                                                                                                              | Reported on page #         |
|---------------------------|----|-------------------------------------------------------------------------------------------------------------------------------------------------------------------------------------------------------------------------------------------------------------------------------------------------------------|----------------------------|
| <b>TITLE</b>              |    |                                                                                                                                                                                                                                                                                                             |                            |
| Title                     | 1  | Identify the report as a systematic review, meta-analysis, or both.                                                                                                                                                                                                                                         | 1                          |
| <b>ABSTRACT</b>           |    |                                                                                                                                                                                                                                                                                                             |                            |
| Structured summary        | 2  | Provide a structured summary including, as applicable: background; objectives; data sources; study eligibility criteria, participants, and interventions; study appraisal and synthesis methods; results; limitations; conclusions and implications of key findings; systematic review registration number. | 2-3                        |
| <b>INTRODUCTION</b>       |    |                                                                                                                                                                                                                                                                                                             |                            |
| Rationale                 | 3  | Describe the rationale for the review in the context of what is already known.                                                                                                                                                                                                                              | 4                          |
| Objectives                | 4  | Provide an explicit statement of questions being addressed with reference to participants, interventions, comparisons, outcomes, and study design (PICOS).                                                                                                                                                  | 4                          |
| <b>METHODS</b>            |    |                                                                                                                                                                                                                                                                                                             |                            |
| Protocol and registration | 5  | Indicate if a review protocol exists, if and where it can be accessed (e.g., Web address), and, if available, provide registration information including registration number.                                                                                                                               | 5                          |
| Eligibility criteria      | 6  | Specify study characteristics (e.g., PICOS, length of follow-up) and report characteristics (e.g., years considered, language, publication status) used as criteria for eligibility, giving rationale.                                                                                                      | 5-6, Supplemental Table S2 |
| Information sources       | 7  | Describe all information sources (e.g., databases with dates of coverage, contact with study authors to identify additional studies) in the search and date last searched.                                                                                                                                  | 5, Supplemental Table S1   |
| Search                    | 8  | Present full electronic search strategy for at least one database, including any limits used, such that it could be repeated.                                                                                                                                                                               | Supplemental Table S1      |
| Study selection           | 9  | State the process for selecting studies (i.e., screening, eligibility, included in systematic review, and, if applicable, included in the meta-analysis).                                                                                                                                                   | 5-6, Figure 1              |
| Data collection process   | 10 | Describe method of data extraction from reports (e.g., piloted forms, independently, in duplicate) and any processes for obtaining and confirming data from investigators.                                                                                                                                  | 6                          |
| Data items                | 11 | List and define all variables for which data were sought (e.g., PICOS, funding sources) and any assumptions and                                                                                                                                                                                             | 6, Supplemental            |

|                                    |    |                                                                                                                                                                                                                        |          |
|------------------------------------|----|------------------------------------------------------------------------------------------------------------------------------------------------------------------------------------------------------------------------|----------|
|                                    |    | simplifications made.                                                                                                                                                                                                  | Table S2 |
| Risk of bias in individual studies | 12 | Describe methods used for assessing risk of bias of individual studies (including specification of whether this was done at the study or outcome level), and how this information is to be used in any data synthesis. | 6-7      |
| Summary measures                   | 13 | State the principal summary measures (e.g., risk ratio, difference in means).                                                                                                                                          | 7-8      |
| Synthesis of results               | 14 | Describe the methods of handling data and combining results of studies, if done, including measures of consistency (e.g., $I^2$ ) for each meta-analysis.                                                              | 8        |

| Section/topic                 | #  | Checklist item                                                                                                                                                                                           | Reported on page #                             |
|-------------------------------|----|----------------------------------------------------------------------------------------------------------------------------------------------------------------------------------------------------------|------------------------------------------------|
| Risk of bias across studies   | 15 | Specify any assessment of risk of bias that may affect the cumulative evidence (e.g., publication bias, selective reporting within studies).                                                             | 9                                              |
| Additional analyses           | 16 | Describe methods of additional analyses (e.g., sensitivity or subgroup analyses, meta-regression), if done, indicating which were pre-specified.                                                         | 7-10                                           |
| <b>RESULTS</b>                |    |                                                                                                                                                                                                          |                                                |
| Study selection               | 17 | Give numbers of studies screened, assessed for eligibility, and included in the review, with reasons for exclusions at each stage, ideally with a flow diagram.                                          | 10, Figure 1                                   |
| Study characteristics         | 18 | For each study, present characteristics for which data were extracted (e.g., study size, PICOS, follow-up period) and provide the citations.                                                             | 10-11, Table 1, Supplemental Tables S2-S3      |
| Risk of bias within studies   | 19 | Present data on risk of bias of each study and, if available, any outcome level assessment (see item 12).                                                                                                | 11, Supplemental Figures S1-S2                 |
| Results of individual studies | 20 | For all outcomes considered (benefits or harms), present, for each study: (a) simple summary data for each intervention group (b) effect estimates and confidence intervals, ideally with a forest plot. | 11-13, Figures 2-3, Supplemental Figures S3-S7 |
| Synthesis of results          | 21 | Present results of each meta-analysis done, including confidence intervals and measures of consistency.                                                                                                  | 11-13, Figures 2-3, Supplemental Figures S3-S7 |
| Risk of bias across studies   | 22 | Present results of any assessment of risk of bias across studies (see item 15).                                                                                                                          | 11,15 Supplemental                             |

|                     |    |                                                                                                                                                                                      |                                                                |
|---------------------|----|--------------------------------------------------------------------------------------------------------------------------------------------------------------------------------------|----------------------------------------------------------------|
|                     |    |                                                                                                                                                                                      | Table S1, S2, S12, S15, S17, S20                               |
| Additional analysis | 23 | Give results of additional analyses, if done (e.g., sensitivity or subgroup analyses, meta-regression [see Item 16]).                                                                | 12-16, Supplemental Tables S4-S10, Supplemental Figures S8-S26 |
| <b>DISCUSSION</b>   |    |                                                                                                                                                                                      |                                                                |
| Summary of evidence | 24 | Summarize the main findings including the strength of evidence for each main outcome; consider their relevance to key groups (e.g., healthcare providers, users, and policy makers). | 16-22                                                          |
| Limitations         | 25 | Discuss limitations at study and outcome level (e.g., risk of bias), and at review-level (e.g., incomplete retrieval of identified research, reporting bias).                        | 19-21                                                          |
| Conclusions         | 26 | Provide a general interpretation of the results in the context of other evidence, and implications for future research.                                                              | 22-23                                                          |
| <b>FUNDING</b>      |    |                                                                                                                                                                                      |                                                                |
| Funding             | 27 | Describe sources of funding for the systematic review and other support (e.g., supply of data); role of funders for the systematic review.                                           | 26-31                                                          |

From: Moher D, Liberati A, Tetzlaff J, Altman DG, The PRISMA Group (2009). Preferred Reporting Items for Systematic Reviews and Meta-Analyses: The PRISMA Statement. PLoS Med 6(7): e1000097. doi:10.1371/journal.pmed1000097

For more information, visit: [www.prisma-statement.org](http://www.prisma-statement.org).
