# Supplementary material for: Effect of pasta in the context of low-glycaemic index dietary patterns on body weight and markers of adiposity: a systematic review and meta-analysis of randomised controlled trials in adults
Source: PubMed Central journal article supplement — BMJ Open. 2018 Apr 2;8(3):e019438. doi: 10.1136/bmjopen-2017-019438 (PMC5884373; doi:10.1136/bmjopen-2017-019438), 2018-04-02
Supplement: bmjopen-2017-019438supp001.pdf [file bmjopen-2017-019438supp001.pdf]

## Online Supplemental Information

### Table of Contents

|                                                                                                                                                                                                      |    |
|------------------------------------------------------------------------------------------------------------------------------------------------------------------------------------------------------|----|
| Supplemental Tables.....                                                                                                                                                                             | 3  |
| Supplemental Table S1: PRISMA Checklist.....                                                                                                                                                         | 3  |
| Supplemental Table S2: Search strategy for studies assessing the effect of pasta in the context of low-GI dietary patterns on body weight in randomized controlled trials .....                      | 6  |
| Supplemental Table S3: PICO framework of the search strategy .....                                                                                                                                   | 8  |
| Supplement Table S4a: Trial characteristics.....                                                                                                                                                     | 9  |
| Supplement Table S4b: Trial characteristics continued.....                                                                                                                                           | 10 |
| Supplement Table S4c: Trial characteristics continued .....                                                                                                                                          | 11 |
| Supplement Table S4d: Trial characteristics continued.....                                                                                                                                           | 12 |
| Supplement Table S4e: Trial characteristics continued.....                                                                                                                                           | 13 |
| Supplemental Table S5: Sensitivity analysis of the systematic removal of each trial*.....                                                                                                            | 14 |
| Supplemental Table S6: Sensitivity analyses of the use of correlation coefficients of 0.25 and 0.75 for crossover trials .....                                                                       | 17 |
| Supplement Table S7. Continuous meta-regression analysis for the effect of pasta in the context of low-GI dietary patterns on body weight (kg) <sup>1</sup> .....                                    | 18 |
| Supplemental Table S8. Continuous meta-regression analysis for the effect of pasta in the context of low-GI dietary patterns on BMI (kg/m <sup>2</sup> ) <sup>1</sup> .....                          | 20 |
| Supplemental Table S9. Continuous meta-regression analysis for the effect of pasta in the context of low-GI dietary patterns on body fat (%) <sup>1</sup> .....                                      | 22 |
| Supplemental Table S10. Continuous meta-regression analysis for the effect of pasta in the context of low-GI dietary patterns on waist circumference (cm) <sup>1</sup> .....                         | 24 |
| Supplementary Table S11. Post-hoc piecewise linear continuous dose-response meta-regression analyses for the effect of pasta intake in the context of low-GI dietary patterns on body weight (kg).26 |    |
| Supplementary Table S12: GRADE assessment of study quality.....                                                                                                                                      | 27 |
| Supplemental Figures .....                                                                                                                                                                           | 30 |
| Supplemental Figure S1: Cochrane risk of bias summary for all included trials.....                                                                                                                   | 30 |
| Supplemental Figure S2: Risk of bias proportion graph for all included trials.....                                                                                                                   | 31 |
| Supplemental Figure S3: Forest plot of randomized controlled trials of the effect of pasta in the context of low-GI dietary patterns on BMI (kg/m <sup>2</sup> ) (n= 1038).....                      | 32 |
| Supplemental Figure S4: Forest plot of randomized controlled trials of the effect of pasta in the context of low-GI dietary patterns on body fat (%) (n= 285).....                                   | 33 |

|                                                                                                                                                                                                                                      |    |
|--------------------------------------------------------------------------------------------------------------------------------------------------------------------------------------------------------------------------------------|----|
| Supplemental Figure S5: Forest plot of randomized controlled trials of the effect of pasta in the context of low-GI dietary patterns on waist circumference (cm) (n = 1380). .....                                                   | 34 |
| Supplemental Figure S6: Forest plot of randomized controlled trials of the effect of pasta in the context of low-GI dietary patterns on waist-to-hip ratio (n = 445). .....                                                          | 35 |
| Supplemental Figure S7: Forest plot of randomized controlled trials of the effect of pasta in the context of low-GI dietary patterns on sagittal abdominal diameter (cm) (n = 478). .....                                            | 36 |
| Supplemental Figure S8: Forest plot of randomized controlled trials of the effect of pasta in the context of low-GI dietary patterns on body weight (kg) using fixed effects models (n = 2448).....                                  | 37 |
| Supplemental Figure S9: Forest plot of the randomized controlled trials of the effect of pasta in the context of low-GI dietary patterns on body weight (kg) which contain data for the approximation of pasta intake (n = 740)..... | 38 |
| Supplemental Figure S21: Continuous meta-regression for change in carbohydrate intake in the low-GI dietary pattern intervention arms by change in body weight (n=19) .....                                                          | 61 |
| Supplemental Figure S22: Continuous meta-regression for change in protein intake in the low-GI dietary pattern intervention arms by change in body weight (n=19) .....                                                               | 62 |
| Supplemental Figure S23: Pasta intake dose-response analyses by spline curve modeling (MKSPLINE procedure) .....                                                                                                                     | 63 |
| Supplemental Figure S24: Funnel plot for the effect of pasta in the context of low-GI dietary patterns on body weight (kg) .....                                                                                                     | 64 |
| Supplemental Figure S25: Funnel plot for the effect of pasta in the context of low-GI dietary patterns on BMI (kg/m <sup>2</sup> ).....                                                                                              | 65 |
| Supplemental Figure S26: Funnel plot for the effect of pasta in the context of low-GI dietary patterns on body fat (%). .....                                                                                                        | 66 |
| Supplemental Figure S27: Funnel plot for the effect of pasta in the context of low-GI dietary patterns on waist circumference (cm).....                                                                                              | 67 |

## Supplemental Tables

### Supplemental Table S1: PRISMA Checklist

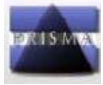

## PRISMA 2009 Checklist

| Section/topic             | #  | Checklist item                                                                                                                                                                                                                                                                                              | Reported on page #         |
|---------------------------|----|-------------------------------------------------------------------------------------------------------------------------------------------------------------------------------------------------------------------------------------------------------------------------------------------------------------|----------------------------|
| <b>TITLE</b>              |    |                                                                                                                                                                                                                                                                                                             |                            |
| Title                     | 1  | Identify the report as a systematic review, meta-analysis, or both.                                                                                                                                                                                                                                         | 1                          |
| <b>ABSTRACT</b>           |    |                                                                                                                                                                                                                                                                                                             |                            |
| Structured summary        | 2  | Provide a structured summary including, as applicable: background; objectives; data sources; study eligibility criteria, participants, and interventions; study appraisal and synthesis methods; results; limitations; conclusions and implications of key findings; systematic review registration number. | 2-3                        |
| <b>INTRODUCTION</b>       |    |                                                                                                                                                                                                                                                                                                             |                            |
| Rationale                 | 3  | Describe the rationale for the review in the context of what is already known.                                                                                                                                                                                                                              | 4                          |
| Objectives                | 4  | Provide an explicit statement of questions being addressed with reference to participants, interventions, comparisons, outcomes, and study design (PICOS).                                                                                                                                                  | 4                          |
| <b>METHODS</b>            |    |                                                                                                                                                                                                                                                                                                             |                            |
| Protocol and registration | 5  | Indicate if a review protocol exists, if and where it can be accessed (e.g., Web address), and, if available, provide registration information including registration number.                                                                                                                               | 5                          |
| Eligibility criteria      | 6  | Specify study characteristics (e.g., PICOS, length of follow-up) and report characteristics (e.g., years considered, language, publication status) used as criteria for eligibility, giving rationale.                                                                                                      | 5-6, Supplemental Table S2 |
| Information sources       | 7  | Describe all information sources (e.g., databases with dates of coverage, contact with study authors to identify additional studies) in the search and date last searched.                                                                                                                                  | 5, Supplemental Table S1   |
| Search                    | 8  | Present full electronic search strategy for at least one database, including any limits used, such that it could be repeated.                                                                                                                                                                               | Supplemental Table S1      |
| Study selection           | 9  | State the process for selecting studies (i.e., screening, eligibility, included in systematic review, and, if applicable, included in the meta-analysis).                                                                                                                                                   | 5-6, Figure 1              |
| Data collection process   | 10 | Describe method of data extraction from reports (e.g., piloted forms, independently, in duplicate) and any processes for obtaining and confirming data from investigators.                                                                                                                                  | 6                          |

|                                    |          |                                                                                                                                                                                                                        |                                                |
|------------------------------------|----------|------------------------------------------------------------------------------------------------------------------------------------------------------------------------------------------------------------------------|------------------------------------------------|
| Data items                         | 11       | List and define all variables for which data were sought (e.g., PICOS, funding sources) and any assumptions and simplifications made.                                                                                  | 6, Supplemental Table S2                       |
| Risk of bias in individual studies | 12       | Describe methods used for assessing risk of bias of individual studies (including specification of whether this was done at the study or outcome level), and how this information is to be used in any data synthesis. | 6-7                                            |
| Summary measures                   | 13       | State the principal summary measures (e.g., risk ratio, difference in means).                                                                                                                                          | 7-8                                            |
| Synthesis of results               | 14       | Describe the methods of handling data and combining results of studies, if done, including measures of consistency (e.g., $I^2$ ) for each meta-analysis.                                                              | 8                                              |
| <b>Section/topic</b>               | <b>#</b> | <b>Checklist item</b>                                                                                                                                                                                                  | <b>Reported on page #</b>                      |
| Risk of bias across studies        | 15       | Specify any assessment of risk of bias that may affect the cumulative evidence (e.g., publication bias, selective reporting within studies).                                                                           | 9                                              |
| Additional analyses                | 16       | Describe methods of additional analyses (e.g., sensitivity or subgroup analyses, meta-regression), if done, indicating which were pre-specified.                                                                       | 7-10                                           |
| <b>RESULTS</b>                     |          |                                                                                                                                                                                                                        |                                                |
| Study selection                    | 17       | Give numbers of studies screened, assessed for eligibility, and included in the review, with reasons for exclusions at each stage, ideally with a flow diagram.                                                        | 10, Figure 1                                   |
| Study characteristics              | 18       | For each study, present characteristics for which data were extracted (e.g., study size, PICOS, follow-up period) and provide the citations.                                                                           | 10-11, Table 1, Supplemental Tables S2-S3      |
| Risk of bias within studies        | 19       | Present data on risk of bias of each study and, if available, any outcome level assessment (see item 12).                                                                                                              | 11, Supplemental Figures S1-S2                 |
| Results of individual studies      | 20       | For all outcomes considered (benefits or harms), present, for each study: (a) simple summary data for each intervention group (b) effect estimates and confidence intervals, ideally with a forest plot.               | 11-13, Figures 2-3, Supplemental Figures S3-S7 |
| Synthesis of results               | 21       | Present results of each meta-analysis done, including confidence intervals and measures of consistency.                                                                                                                | 11-13, Figures 2-3, Supplemental Figures S3-S7 |
| Risk of bias across studies        | 22       | Present results of any assessment of risk of bias across studies (see Item 15).                                                                                                                                        | 11,15 Supplemental                             |

|                     |    |                                                                                                                                                                                      |                                                                |
|---------------------|----|--------------------------------------------------------------------------------------------------------------------------------------------------------------------------------------|----------------------------------------------------------------|
|                     |    |                                                                                                                                                                                      | Table S1, S2, S12, S15, S17, S20                               |
| Additional analysis | 23 | Give results of additional analyses, if done (e.g., sensitivity or subgroup analyses, meta-regression [see Item 16]).                                                                | 12-16, Supplemental Tables S4-S10, Supplemental Figures S8-S26 |
| <b>DISCUSSION</b>   |    |                                                                                                                                                                                      |                                                                |
| Summary of evidence | 24 | Summarize the main findings including the strength of evidence for each main outcome; consider their relevance to key groups (e.g., healthcare providers, users, and policy makers). | 16-22                                                          |
| Limitations         | 25 | Discuss limitations at study and outcome level (e.g., risk of bias), and at review-level (e.g., incomplete retrieval of identified research, reporting bias).                        | 19-21                                                          |
| Conclusions         | 26 | Provide a general interpretation of the results in the context of other evidence, and implications for future research.                                                              | 22-23                                                          |
| <b>FUNDING</b>      |    |                                                                                                                                                                                      |                                                                |
| Funding             | 27 | Describe sources of funding for the systematic review and other support (e.g., supply of data); role of funders for the systematic review.                                           | 26-31                                                          |

From: Moher D, Liberati A, Tetzlaff J, Altman DG, The PRISMA Group (2009). Preferred Reporting Items for Systematic Reviews and Meta-Analyses: The PRISMA Statement. PLoS Med 6(7): e1000097. doi:10.1371/journal.pmed1000097

For more information, visit: [www.prisma-statement.org](http://www.prisma-statement.org).

**Supplemental Table S2: Search strategy for studies assessing the effect of pasta in the context of low-GI dietary patterns on body weight in randomized controlled trials**

| Database | Search Period             | Search Terms                                                                                                                                                                                                                                                                                                                                                                                                                                                                                                                                                                                                                                                                                                                                     |
|----------|---------------------------|--------------------------------------------------------------------------------------------------------------------------------------------------------------------------------------------------------------------------------------------------------------------------------------------------------------------------------------------------------------------------------------------------------------------------------------------------------------------------------------------------------------------------------------------------------------------------------------------------------------------------------------------------------------------------------------------------------------------------------------------------|
| Medline  | 1946 to February 07, 2017 | <ol style="list-style-type: none"> <li>1. pasta/</li> <li>2. spaghetti/</li> <li>3. macaroni/</li> <li>4. lasagna/</li> <li>5. fusilli/</li> <li>6. noodle/</li> <li>7. glycaemic index.tw.</li> <li>8. glycemic index.tw.</li> <li>9. glycaemic ind*.tw.</li> <li>10. glycemic ind*.tw.</li> <li>11. glycemic load*.tw.</li> <li>12. glycaemic load*.tw.</li> <li>13. glycemic index/</li> <li>14. body mass index/</li> <li>15. body mass index.tw.</li> <li>16. BMI.tw.</li> <li>17. overweight.tw.</li> <li>18. weight*.tw.</li> <li>19. 1 or 2 or 3 or 4 or 5 or 6 or 7 or 8 or 9 or 10 or 11 or 12 or 13</li> <li>20. 14 or 15 or 16 or 17 or 18</li> <li>21. 19 and 20</li> <li>22. limit 21 to animals</li> <li>23. 21 not 22</li> </ol> |
| Embase   | 1946 to February 07, 2017 | <ol style="list-style-type: none"> <li>1. pasta/</li> <li>2. spaghetti/</li> <li>3. macaroni/</li> <li>4. lasagna/</li> <li>5. fusilli/</li> <li>6. noodle/</li> <li>7. glycaemic index.tw.</li> <li>8. glycemic index.tw.</li> <li>9. glycaemic ind*.tw.</li> <li>10. glycemic ind*.tw.</li> <li>11. glycemic load*.tw.</li> <li>12. glycaemic load*.tw.</li> <li>13. glycemic index/</li> <li>14. body mass index/</li> <li>15. body mass index.tw.</li> <li>16. BMI.tw.</li> <li>17. overweight.tw.</li> <li>18. weight*.tw.</li> </ol>                                                                                                                                                                                                       |

|                            |                              |                                                                                                                                                                                                                                                                                                                                                                                                                                                                                                                                                                                                                      |
|----------------------------|------------------------------|----------------------------------------------------------------------------------------------------------------------------------------------------------------------------------------------------------------------------------------------------------------------------------------------------------------------------------------------------------------------------------------------------------------------------------------------------------------------------------------------------------------------------------------------------------------------------------------------------------------------|
|                            |                              | <p>19. 1 or 2 or 3 or 4 or 5 or 6 or 7 or 8 or 9 or 10 or 11 or 12 or 13</p> <p>20. 14 or 15 or 16 or 17 or 18</p> <p>21. 19 and 20</p> <p>22. limit 21 to animals</p> <p>23. 21 not 22</p>                                                                                                                                                                                                                                                                                                                                                                                                                          |
| The<br>Cochrane<br>Library | 1946 to February<br>07, 2017 | <p>1. pasta/</p> <p>2. spaghetti/</p> <p>3. macaroni/</p> <p>4. lasagna/</p> <p>5. fusilli/</p> <p>6. noodle/</p> <p>7. glycemic index/</p> <p>8. glycaemic ind*.tw.</p> <p>9. glycemic ind*.tw.</p> <p>10. glycemic load*.tw.</p> <p>11. glycaemic load*.tw.</p> <p>12. exp body weight/</p> <p>13. body weight*.tw.</p> <p>14. BMI.tw.</p> <p>15. body mass index/</p> <p>16. body mass index.tw.</p> <p>17. weight*.tw.</p> <p>18. 1 or 2 or 3 or 4 or 5 or 6 or 7 or 8 or 9 or 10 or 11</p> <p>19. 12 or 13 or 14 or 15 or 16 or 17</p> <p>20. 18 and 19</p> <p>21. limit 20 to animals</p> <p>22. 20 not 21</p> |

**Supplemental Table S3: PICO framework of the search strategy**

| <b>PICO framework<sup>a</sup> defined in the present systematic review and meta-analysis</b> |                                                                                      |                                                                                     |                                                                                                   |
|----------------------------------------------------------------------------------------------|--------------------------------------------------------------------------------------|-------------------------------------------------------------------------------------|---------------------------------------------------------------------------------------------------|
| <b>Participants</b>                                                                          | <b>Interventions</b>                                                                 | <b>Comparators</b>                                                                  | <b>Outcomes</b>                                                                                   |
| Adult men and women excluding pregnant or breastfeeding women                                | Low glycemic index interventions where pasta is included as part of the intervention | Higher glycemic index diets where pasta is not included as part of the intervention | Body weight<br>Body mass index (BMI)<br>Body Fat (%)<br>Waist circumference<br>Waist-to-hip ratio |

<sup>a</sup>Moher D, Shamseer L, Clarke M, Ghersi D, Liberati A, Petticrew M, Shekelle P, Stewart LA and PRISMA-P Group. Preferred reporting items for systematic review and meta-analysis protocols (PRISMA-P) 2015 statement. *Systematic Reviews* 2015; 4:1. <https://doi.org/10.1186/2046-4053-4-1>



## Supplement Table S4a: Trial characteristics

| Overweight/Obese Trials      |                |                              |                   |                                     |                                             |                               |                      |         |        |                   |                |                           |                                        |                           |
|------------------------------|----------------|------------------------------|-------------------|-------------------------------------|---------------------------------------------|-------------------------------|----------------------|---------|--------|-------------------|----------------|---------------------------|----------------------------------------|---------------------------|
| Study                        | Subjects       | Sample Description           | Mean Age (y) (SD) | Mean Baseline Body Weight (kg) (SD) | Mean Baseline BMI (kg/m <sup>2</sup> ) (SD) | Mean GI:GL of diet (SD) ¶ ¶ ¶ | Pasta Dose (serv/wk) | Setting | Design | Energy Balance§   | Duration (wks) | Diet Composition % (SD)§§ | Dietary Prescription                   | Funding Source            |
| Karl et al. 2015 †††         | 39 (19M:20F)** | OB, OP                       |                   |                                     |                                             |                               | 2.33                 | USA     | P      | Negative+ Neutral | 17             |                           | CR to 2/3kcal; Metabolic               | Agency                    |
| Low GI                       | 20             |                              | 56 (5)*           | 92.9 (13.6)*                        | 32.3 (3.4)*                                 | 42:133                        |                      |         |        |                   |                | 68:15:16                  |                                        |                           |
| Higher GI                    | 19             |                              | 56 (5)*           | 94 (9.7)*                           | 33.4 (2.6)*                                 | 61:201                        |                      |         |        |                   |                | 70:16:14                  |                                        |                           |
| Pereira et al. 2015          | 19 (4M:15F)**  | OW, IP/OP                    |                   |                                     |                                             |                               | NR                   | Brazil  | P      | Neutral           | 6.4            |                           | Ad libitum                             | Unknown                   |
| Low GI                       | 10             |                              | 28(5)             | 80.0(12.6)                          | 29.9 (2.1)                                  | 41.2(2.2) ¥ **                |                      |         |        |                   |                | 48.3:16.1:32.8            |                                        |                           |
| Higher GI                    | 9              |                              | 26(3)             | 79.1(12.2)                          | 29.1 (2.0)                                  | 74.1(2.9) ¥ **                |                      |         |        |                   |                | 54.6:12.7:34.4            |                                        |                           |
| Buscemi et al. 2013          | 40 (19M:21F)** | OW/OB, high CVD risk, OP     |                   |                                     |                                             |                               | NR                   | Italy   | P      | Negative          | 12             |                           | CR to 20kcal/kg/d; Ad libitum          | Unknown                   |
| Low GI                       | 19             |                              | 51 (8)            | 93.8 (17.3)                         | 34.3 (6.6)                                  | 48.1: 138                     |                      |         |        |                   |                | 56:18:26                  |                                        |                           |
| Higher GI                    | 21             |                              | 49 (8)            | 93.2 (14.4)                         | 34.5 (5.1)                                  | 59.3: 174                     |                      |         |        |                   |                | 57:16:27                  |                                        |                           |
| Costa et al. 2012            | 17 (7M:10F)    | OW, IP/OP                    | 25.4 (5.8)        | 84.1(16.3)                          | 26.3(3.2)                                   |                               | NR                   | Brazil  | C      | Neutral           | 4              |                           | Ab libitum, 2 meals+3 fruit/d provided | NR                        |
| Low GI                       |                |                              |                   |                                     |                                             | 47.5(3.8)                     |                      |         |        |                   |                | 58.6:13.9:25.5            |                                        |                           |
| Higher GI                    |                |                              |                   |                                     |                                             | 61.6(2.8)                     |                      |         |        |                   |                | 55.4:14.2:30.3            |                                        |                           |
| Jebb et al. 2010 - High MUFA | 225**          | OH, some CV risk factors, OP | ~52               |                                     | ~28.5 <sup>+</sup>                          |                               | 1.75                 | UK      | P      | Neutral           | 24             |                           | Ad Libitum, key foods provided         | Agency, foods by industry |
| Low GI                       | 115            |                              |                   | 83.7 (69.6-93.1)¶¶¶                 |                                             | ~55.2                         |                      |         |        |                   |                | ~44.6:16.4:35.7****       |                                        |                           |
| Higher GI                    | 110            |                              |                   | 80.5 (70.0-92.1)¶¶¶                 |                                             | ~63.3                         |                      |         |        |                   |                | ~44.9:15.3:35.6****       |                                        |                           |
| Jebb et al. 2010 - Low Fat   | 250**          | OH, some CV risk factors, OP | ~52               |                                     | ~28.5 <sup>+</sup>                          |                               | 3.5                  | UK      | P      | Neutral           | 24             |                           | Ad Libitum, key foods provided         | Agency, foods by industry |
| Low GI                       | 117            |                              |                   | 79.4 (70.1- 91.8)¶¶¶                |                                             | ~56.3                         |                      |         |        |                   |                | ~51.5:14.2:26.1****       |                                        |                           |
| Higher GI                    | 111            |                              |                   | 80.7 (71.4- 91.4)¶¶¶                |                                             | ~64.4                         |                      |         |        |                   |                | ~51.1:15.7:27.5****       |                                        |                           |
| Larsen et al. 2010-High Pro  | 231**          | OW/OB, OP                    |                   |                                     | NR                                          |                               | NR                   | Europe  | P      | Neutral           | 26             |                           | Ad libitum                             | Agency                    |
| Low GI                       | 124            |                              | 42.1 (6.5)        | 88.5 (15.6)                         |                                             | ~56.5: 108.9                  |                      |         |        |                   |                | ~43:22:32                 |                                        |                           |
| Higher GI                    | 107            |                              | 42 (5.7)          | 89.5 (17.1)                         |                                             | ~61.4: 113.1                  |                      |         |        |                   |                | ~45:23:31                 |                                        |                           |
| Larsen et al. 2010 - Low Pro | 203 **         | OW/OB, OP                    |                   |                                     | NR                                          |                               | NR                   | Europe  | P      | Neutral           | 26             |                           | Ad libitum                             | Agency                    |
| Low GI                       | 106            |                              | 42.2 (5.7)        | 88.4 (15.7)                         |                                             | ~56.2: 121                    |                      |         |        |                   |                | ~51:18:30                 |                                        |                           |
| Higher GI                    | 97             |                              | 42 (5.9)          | 86.6 (13.8)                         |                                             | ~61.6: 137.9                  |                      |         |        |                   |                | ~51:17:31                 |                                        |                           |

## Supplement Table S4b: Trial characteristics continued

| Overweight/Obese Trials continued |               |                         |                   |                                     |                                             |                                          |                      |         |        |                            |                |                                                     |                                           |                  |  |
|-----------------------------------|---------------|-------------------------|-------------------|-------------------------------------|---------------------------------------------|------------------------------------------|----------------------|---------|--------|----------------------------|----------------|-----------------------------------------------------|-------------------------------------------|------------------|--|
| Study                             | Subjects      | Sample Description      | Mean Age (y) (SD) | Mean Baseline Body Weight (kg) (SD) | Mean Baseline BMI (kg/m <sup>2</sup> ) (SD) | Mean GI:GL of diet (SD) ¶ ¶ ¶            | Pasta Dose (serv/wk) | Setting | Design | Energy Balance§            | Duration (wks) | Diet Composition % (SD)§§                           | Dietary Prescription                      | Funding Source   |  |
| Solomon et al. 2010               | 22 (8M:14F)** | OB, Pre-T2DM, OP        |                   |                                     |                                             |                                          | 7                    | USA     | P      | Neutral                    | 12             |                                                     | Metabolic plus exercise program           | Agency           |  |
| Low GI                            | 10 (3M:7F)    |                         | 67 (6)            | 97.4 (12.0)                         | 34.9 (1.1)                                  | 39.8 (0.9)                               |                      |         |        |                            |                | 54.7(0.3):28.3(0.3):17.0(0.3)                       |                                           |                  |  |
| Higher GI                         | 12 (5M:7F)    |                         | 64 (3)            | 94.7 (15.2)                         | 34.1 (1.1)                                  | 80.0 (2.1)                               |                      |         |        |                            |                | 55.6(0.7):27.8(0.7):16.6(0.3)                       |                                           |                  |  |
| Philippou et al. 2009- 6 mo       | 38**          | ≥1 CHD risk factors, OP | (35-65) ¶         |                                     |                                             |                                          | NR                   | UK      | P      | Negative (for all but n=2) | 24             |                                                     | 500kcal CR; Ad libitum                    | Agency           |  |
| Low GI                            | 22            |                         |                   | 91.3(14.8)***                       | 29.1 (3.6)***                               | 50.6 (4.6):<br>114.4(31.5)               |                      |         |        |                            |                |                                                     |                                           |                  |  |
| Higher GI                         | 16            |                         |                   | 97.5(16.4)***                       | 30.5 (3.5)***                               | 63.2(5.6):<br>175.0(45.6)                |                      |         |        |                            |                |                                                     |                                           |                  |  |
| Philippou et al. 2009- 4 mo       | 42**          | OW, OP                  | (18-65)¶          |                                     |                                             |                                          | NR                   | UK      | P      | Neutral                    | 16             |                                                     | Ad libitum                                | Unknown          |  |
| Low GI                            | 23            |                         |                   | 87.2 (15.3)                         | 32.5 (4.8)                                  | 49.7(5.7):89.7(27.5)                     |                      |         |        |                            |                | 47.6(6.7):19.5(4.2):31.8(5.8)                       |                                           |                  |  |
| Higher GI                         | 19            |                         |                   | 83.6 (13.4)                         | 31.3 (4.8)                                  | 63.7(9.4):136.8(56.3)                    |                      |         |        |                            |                | 48.9(7):19.3(4.9):30.9(9)                           |                                           |                  |  |
| Abete et al. 2008                 | 32 (18M:14F)  | OB, OP                  | 36(7)             |                                     |                                             |                                          | 2.33                 | Spain   | P      | Negative                   | 8              |                                                     | 30% CR; Ad libitum, 3-day menus           | Agency           |  |
| Low GI                            | 16            |                         |                   | 94.3(16.1)                          | 32.8 (4.3)                                  | (40-45)¶                                 |                      |         |        |                            |                | 50.2 (1.8):18.3(1.6):31.5(1.6)                      |                                           |                  |  |
| Higher GI                         | 16            |                         |                   | 94.4(13.1)                          | 32.2 (4.4)                                  | (60-65)¶                                 |                      |         |        |                            |                | 47.8(6.8):19.6(5.6):32.6(4.3)                       |                                           |                  |  |
| Aston et al. 2008                 | 19 (0M:19F)** | OW/OB, OP               | 51.9(7.6)         | 87.5 (15)                           | 33.1 (4.9)                                  |                                          | 3.33                 | UK      | C      | Neutral                    | 12             |                                                     | Ad libitum, key CHO foods provided        | Agency           |  |
| Low GI                            |               |                         |                   |                                     |                                             | 55.5(3.8):<br>133.8(22.9)*****           |                      |         |        |                            |                | 51.4(6.0):17.0(2.4):32.2(5.1)*<br>***               |                                           |                  |  |
| Higher GI                         |               |                         |                   |                                     |                                             | 63.9(3):<br>138.8(30.5)*****             |                      |         |        |                            |                | 47.6(6.1):17.6(3.3):34.1(5.7)*<br>***               |                                           |                  |  |
| Jensen et al. 2008                | 44 (0M:44F)** | OW, OP                  | (20-40)¶          |                                     |                                             |                                          | 3                    | Denmark | P      | Neutral                    | 10             |                                                     | Ad libitum, partial provision, menu plans | Agency, Industry |  |
| Low GI                            | 22 (0M:22F)   |                         |                   | 77.9(6.9)                           | 27.4 (1.5)                                  | 72¥                                      |                      |         |        |                            |                | ~57(5):17(0):23(5) ‡                                |                                           |                  |  |
| Higher GI                         | 22 (0M:22F)   |                         |                   | 80.2(1.4)                           | 27.6 (0.3)                                  | 95¥                                      |                      |         |        |                            |                | ~57(5):17(0):22(5) ‡                                |                                           |                  |  |
| Philippou et al. 2008             | 13 (5M:8F)**  | ≥1 CHD risk factors, OP |                   |                                     |                                             |                                          | NR                   | UK      | P      | Negative                   | 12             |                                                     | 500kcal CR; Ad libitum                    | Agency           |  |
| Low GI                            | 7 (3M:4F)     |                         | 54 (49-58)¶¶      | 81.5 (4.7)***                       | 28.7 (2.1)***                               | 51.3(51.0-52.0):<br>105.6 (76.9-110.1)¶¶ |                      |         |        |                            |                | 46.0(37.8-51.0): 17.1(15.7-17.4): 32.8(31.3-37.1)¶¶ |                                           |                  |  |
| Higher GI                         | 6 (2M:4F)     |                         | 45 (39-50)¶¶      | 89.7 (12.8)***                      | 31.5 (4.4)***                               | 59.3(59.2-64.0):<br>114.7(98.5-134.9)¶¶  |                      |         |        |                            |                | 49.4(47.8-51.7):19.6(14.0-23.1):29.2(25.2-34.5)¶¶   |                                           |                  |  |

## Supplement Table S4c: Trial characteristics continued

| Overweight/Obese Trials continued        |                 |                    |                   |                                     |                                             |                               |                      |         |           |                 |                |                                  |                                                      |                  |
|------------------------------------------|-----------------|--------------------|-------------------|-------------------------------------|---------------------------------------------|-------------------------------|----------------------|---------|-----------|-----------------|----------------|----------------------------------|------------------------------------------------------|------------------|
| Study                                    | Subjects        | Sample Description | Mean Age (y) (SD) | Mean Baseline Body Weight (kg) (SD) | Mean Baseline BMI (kg/m <sup>2</sup> ) (SD) | Mean GI:GL of diet (SD) ¶ ¶ ¶ | Pasta Dose (serv/wk) | Setting | Design    | Energy Balance§ | Duration (wks) | Diet Composition % (SD)§§        | Dietary Prescription                                 | Funding Source   |
| Bellisle et al. 2007                     | 65 (0M:65F)**   | OW/OB, OP          |                   |                                     |                                             |                               |                      | NR      | France    | P               | Neutral        | 12                               | Ad libitum                                           | Industry         |
| Low GI                                   | 35              |                    | 46.1 (13.6)       | 80 (13.2)                           | 30.2 (4.1)                                  | na                            |                      |         |           |                 |                |                                  |                                                      |                  |
| Higher GI                                | 30              |                    | 45.3 (12.0)       | 79 (13.1)                           | 30.4 (4.4)                                  | na                            |                      |         |           |                 |                |                                  |                                                      |                  |
| de Rougemont et al. 2007                 | 38 (22M:16F)**  | OW, OP             |                   |                                     |                                             |                               | 2.8                  | France  | P         | Neutral         | 5              |                                  | Ad libitum, some foods provided                      | Agency, Industry |
| Low GI                                   | 19              |                    | 36.3 (8.7)        | 77.2 (9.6)                          | 27.5 (1.3)                                  | 46.5 (1.3)                    |                      |         |           |                 |                | 42.6 (3.9):19.8 (1.7):37.7 (4.4) |                                                      |                  |
| Higher GI                                | 19              |                    | 40.4 (9.6)        | 77.3 (9.2)                          | 27.2 (1.3)                                  | 66.3 (2.6)                    |                      |         |           |                 |                | 44.1 (3.5):17.6 (1.7):38.4 (3.1) |                                                      |                  |
| Sichieri et al. 2007                     | 123 (0M:123F)** | OW, OP             |                   |                                     |                                             |                               |                      | NR      | Brazil    | P               | Negative       | 72                               | 100-300kcal CR; 6-d menu and exchange lists provided | Agency           |
| Low GI                                   | 63              |                    | 37.2 (5.4)*       | 67.7 (6.6)*                         | na                                          | 21(38): 74(84)                |                      |         |           |                 |                | 59.5 (6.3): 13.3: 27.2(4.6)      |                                                      |                  |
| Higher GI                                | 60              |                    | 37.5 (5.6)*       | 68.5 (7.5)*                         | na                                          | 51(28): 199(43)               |                      |         |           |                 |                | 61.6 (6.2): 12.3: 26.1(4.7)      |                                                      |                  |
| McMillian-Price et al. 2006-High Carb    | 64(16M:48F)     | OW/OB, OP          |                   |                                     |                                             |                               |                      | NR      | Australia | P               | Negative       | 12                               | Ad libitum, key foods and meals provided             | Agency-Industry  |
| Low GI                                   | 32              |                    | 30.5 (7.9)        | 87.1 (15.3)                         | 30.6 (4.5)                                  | 45 (6):89 (28)                |                      |         |           |                 |                | 56 (6):19 (0):22 (6)             |                                                      |                  |
| Higher GI                                | 32              |                    | 31.8 (9.6)        | 86 (10.7)                           | 30.9 (3.4)                                  | 70 (6):129 (45)               |                      |         |           |                 |                | 60 (6):18 (6):19 (6)             |                                                      |                  |
| McMillian-Price et al. 2006-High Protein | 65(15M:50F)     | OW/OB, OP          |                   |                                     |                                             |                               |                      | NR      | Australia | P               | Negative       | 12                               | Ad libitum, key foods and meals provided             | Agency-Industry  |
| Low GI                                   | 33              |                    | 34.6 (8.6)        | 88.4 (17.2)                         | 32.1 (5.2)                                  | 44 (6):59 (23)                |                      |         |           |                 |                | 40 (11):26 (6):28 (6)            |                                                      |                  |
| Higher GI                                | 32              |                    | 30.2 (8.5)        | 87.7 (16.4)                         | 31.3 (4.5)                                  | 59 (6):75 (17)                |                      |         |           |                 |                | 42 (6):28 (6):27 (6)             |                                                      |                  |
| Wolever et al. 2002                      | 24 (5M:19F)**   | IGT, OP            |                   |                                     |                                             |                               |                      | NR      | Canada    | P               | Neutral        | 16                               | Ad libitum, partial provision                        | Agency           |
| Low GI                                   | 13(3M:10F)      |                    | 55.2 (10.8)       | 79.7 (13.1)***                      | 29.7 (4.3)                                  | 54.4 (2.5):91.8 (9.4)         |                      |         |           |                 |                | 54.8 (6.1):19.4 (1.8):24.7 (5.8) |                                                      |                  |
| Higher GI                                | 11(2M:9F)       |                    | 58.8 (13.3)       | 76.4 (20.4)***                      | 29.3 (7.3)                                  | 59.3 (2.0):96.8 (11.6)        |                      |         |           |                 |                | 52.8 (6.6):17.4 (2.3):27.9 (6.3) |                                                      |                  |

**Supplement Table S4d: Trial characteristics continued**

| Diabetes Trials     |                |                    |                   |                                     |                                             |                               |                      |         |                |                 |                |                                  |                      |                                                         |
|---------------------|----------------|--------------------|-------------------|-------------------------------------|---------------------------------------------|-------------------------------|----------------------|---------|----------------|-----------------|----------------|----------------------------------|----------------------|---------------------------------------------------------|
| Study               | Subjects       | Sample Description | Mean Age (y) (SD) | Mean Baseline Body Weight (kg) (SD) | Mean Baseline BMI (kg/m <sup>2</sup> ) (SD) | Mean GI:GL of diet (SD) ¶ ¶ ¶ | Pasta Dose (serv/wk) | Setting | Design         | Energy Balance§ | Duration (wks) | Diet Composition % (SD)§§        | Dietary Prescription | Funding Source                                          |
| Jenkins et al. 2014 | 141(77M:64F)   | T2DM, OP           |                   |                                     |                                             |                               |                      | NR      | Canada         | P               | Neutral        | 12                               |                      | Ad libitum, bread supplement<br>Industry Association    |
| Low GI              | 70 (38M:32F)   |                    | 59 (10)           | 85 (20)                             | 30 (5)                                      | ~51:53                        |                      |         |                |                 |                | ~38.5:19.8:37.2                  |                      |                                                         |
| Higher GI           | 71 (39M:32F)   |                    | 59 (10)           | 84 (19)                             | 31 (6)                                      | ~62:89                        |                      |         |                |                 |                | ~49.2:19.8:27.4                  |                      |                                                         |
| Visek et al. 2014   | 20 (12M:8F)    | T2DM, OP           | 62.7 (5.8)        | 91.9 (14.1)                         | 32 (4.2)                                    |                               |                      | NR      | Czech Republic | C               | Neutral        | 12                               |                      | Ad libitum<br>Agency                                    |
| Low GI              |                |                    |                   |                                     |                                             | 49 (48-51)¶¶¶                 |                      |         |                |                 |                | ~37.2:18.0:36.0                  |                      |                                                         |
| Higher GI           |                |                    |                   |                                     |                                             | 68 (61-72)¶¶¶                 |                      |         |                |                 |                | ~36.2:17.3:40.0                  |                      |                                                         |
| Jenkins et al. 2012 | 121 (61M: 60F) | T2DM, OP           |                   |                                     |                                             |                               |                      | NR      | Canada         | P               | Neutral        | 12                               |                      | Ad libitum<br>Agency                                    |
| Low GI              | 60             |                    | 58 (10.1)         | 85.6 (20.1)                         | 31.4 (7.0)                                  | 47: 80                        |                      |         |                |                 |                | 45.4:22.8:30.5                   |                      |                                                         |
| Higher GI           | 61             |                    | 61 (7.8)          | 82.5 (17.2)                         | 29.9 (5.5)                                  | 58: 100                       |                      |         |                |                 |                | 48.3:21.4:28.5                   |                      |                                                         |
| Yusof et al. 2009   | 100**          | T2DM, OP           | NR                |                                     |                                             |                               |                      | NR      | Malaysia       | P               | Neutral        | 12                               |                      | Ad libitum, key foods provided to lowGI group<br>Agency |
| Low GI              | 51             |                    |                   | 69.12 (13.33)                       | 27.05 (4.91)                                | 57(6): 108(32)                |                      |         |                |                 |                | 52(4):18(3):30(4)                |                      |                                                         |
| Higher GI           | 49             |                    |                   | 66.83 (11.50)                       | 26.79 (4.65)                                | 64(5): 131(30)                |                      |         |                |                 |                | 54(4):17(3):28(5)                |                      |                                                         |
| Jenkins et al 2008  | 210 (125M:82F) | T2DM, OP           |                   |                                     |                                             |                               |                      | NR      | Canada         | P               | Neutral        | 24                               |                      | Ad libitum<br>Agency                                    |
| Low GI              | 106 (65M:41F)  |                    | 60 (10)           | 87.0 (20.0)                         | 30.6 (6.0)                                  | 49.4: 91.5                    |                      |         |                |                 |                | 44.0:21.2:33.3                   |                      |                                                         |
| Higher GI           | 104 (63M:41F)  |                    | 61 (9)            | 87.8 (19.4)                         | 31.2 (5.8)                                  | 59.3: 117.9                   |                      |         |                |                 |                | 47.5:20.7:30.5                   |                      |                                                         |
| Wolever et al. 2008 | 103            | T2DM, OW/OB, OP    |                   |                                     |                                             |                               |                      | NR      | Canada         | P               | Neutral        | 52                               |                      | Ad libitum, key foods provided<br>Agency                |
| Low GI              | 55             |                    | 60.6 (7.5)*       | 81.1 (18.7)*                        | 31.6 (4.5)*                                 | 55.1 (3.0): 133 (14.8)        |                      |         |                |                 |                | 51.9 (6.7):20.6(3.0):26.5 (5.9)  |                      |                                                         |
| Higher GI           | 48             |                    | 60.4 (7.9)*       | 84.4(18.0)*                         | 30.1 (4.3)*                                 | 63.2 (2.8): 135 (20.8)        |                      |         |                |                 |                | 46.5 (6.2):20.4 (2.8):30.8 (4.8) |                      |                                                         |

## Supplement Table S4e: Trial characteristics continued

| Diabetes Trials continued |                |                    |                   |                                     |                                             |                               |                      |         |           |                 |                |                                  |                                                |                  |
|---------------------------|----------------|--------------------|-------------------|-------------------------------------|---------------------------------------------|-------------------------------|----------------------|---------|-----------|-----------------|----------------|----------------------------------|------------------------------------------------|------------------|
| Study                     | Subjects       | Sample Description | Mean Age (y) (SD) | Mean Baseline Body Weight (kg) (SD) | Mean Baseline BMI (kg/m <sup>2</sup> ) (SD) | Mean GI:GL of diet (SD) ¶ ¶ ¶ | Pasta Dose (serv/wk) | Setting | Design    | Energy Balance§ | Duration (wks) | Diet Composition % (SD)§§        | Dietary Prescription                           | Funding Source   |
| Jimenez-Cruz et al. 2003  | 14 (6M:8F)**   | T2DM, OP           | 59 (34)           |                                     |                                             |                               |                      | NR      | Mexico    | C               | Neutral        | 6                                |                                                | Industry         |
| Low GI                    |                |                    |                   | 91.6 (24.3)                         | 32.4 (6.0)                                  | 44(3.4): 86(19.8)             |                      |         |           |                 |                | 60:21:23                         | Ad libitum                                     |                  |
| Higher GI                 |                |                    |                   | 92.6 (25.4)                         | 32.3 (6.0)                                  | 56(4.9): 139(27.3)            |                      |         |           |                 |                | 64:18:20                         |                                                |                  |
| Heilbronn et al. 2002     | 45 (23M:22F)** | T2DM, OW, OP       |                   |                                     | NR                                          |                               |                      | 3.5     | Australia | P               | Negative       | 8                                | CR to1500kcal/d; Ad libitum, partial provision | Unknown          |
| Low GI                    | 24 (11M:13F)   |                    | 56.0(9.4)         | 91.7(16.2)                          |                                             | 43                            |                      |         |           |                 |                | 58.9 (2.9):22.2 (1.5):17.9 (3.9) |                                                |                  |
| Higher GI                 | 21 (12M:9F)    |                    | 57.5(9.6)         | 93.2 (13.3)                         |                                             | 75                            |                      |         |           |                 |                | 60.8 (2.3):21.7 (0.9):17.1 (2.3) |                                                |                  |
| Fontvieille et al. 1992   | 18 (12M:6F)    | T1DM/T2DM, OP      | 47.2(11.6)        | NR                                  | 24.8(2.6)                                   |                               |                      | 4.7     | France    | C               | Neutral        | 5                                | Ad libitum                                     | Agency, Industry |
| Low GI                    |                |                    |                   |                                     |                                             | 38.1(5.3)                     |                      |         |           |                 |                | 45.8(7.2):18.0(2.5):36.2(6.8)    |                                                |                  |
| Higher GI                 |                |                    |                   |                                     |                                             | 64.2(3.1)                     |                      |         |           |                 |                | 44.9(7.3):18.8(1.6):36.3(6.0)    |                                                |                  |
| Fontvieille et al. 1988   | 8 (4M:4F)      | T1DM, OP           | 43.5 (9.9)        | NR                                  | 24.1 (6.8)                                  |                               |                      | 3.5     | France    | C               | Neutral        | 3                                | Ad libitum, partial provision                  | Agency, Industry |
| Low GI                    |                |                    |                   |                                     |                                             | 46.5(2.5)                     |                      |         |           |                 |                | 46.1 (4.5):17.4 (1.4):35.0 (2.8) |                                                |                  |
| Higher GI                 |                |                    |                   |                                     |                                             | 60.1 (5.1)                    |                      |         |           |                 |                | 45.4 (4.5):16.9 (1.7):36.0 (2.8) |                                                |                  |
| <b>CHD Trial</b>          |                |                    |                   |                                     |                                             |                               |                      |         |           |                 |                |                                  |                                                |                  |
| Frost et al. 2004         | 55 (48M:7F)**  | CHD, OP            |                   |                                     |                                             |                               |                      | NR      | UK        | P               | Neutral §§§    | 12                               | Ad Libitum                                     | Unknown          |
| Low GI                    | 26 (23M:3F)    |                    | 63.6 (9.4)        | 81.2 (12.2)                         | 26.9 (3.3)                                  | 50(4):115(39)                 |                      |         |           |                 |                | 49 (5):18 (5):31 (5)             |                                                |                  |
| Higher GI                 | 29 (25M:4F)    |                    | 61.8 (9)          | 81.7 (16.7)                         | 28.7 (4.6)                                  | 57(4):106(34)                 |                      |         |           |                 |                | 47 (10):18 (5):32 (10)           |                                                |                  |

Abbreviations: BMI=Body Mass Index; C=Crossover design; Carb=Carbohydrate; CED= carbohydrate exchange diet; CHD= Coronary Heart Disease; CR= calorie restriction; CV=cardiovascular; GI= glycemic index; GL=glycemic load; IGT= impaired glucose tolerance; IP=inpatient; IR= insulin resistant; High Carb= high carbohydrate; HI= hyperinsulinemic; M= male; mo=months; MUFA=monounsaturated fatty acids; na=not available; T1DM=type 1 diabetes mellitus; T2DM = type 2 diabetes mellitus; OB= obese; OH=otherwise healthy; OP = outpatient; OW= overweight; P=Parallel design; SD= standard deviation; F = female; UK= United Kingdom; USA= United States of America; wks=weeks; y= years

§Negative energy balance diets were designed for weight loss, Neutral energy balance diets for weight maintenance, where all diets are isocaloric between test and control groups; §§Energy from carbohydrate: protein: fat for the planned diet or if not planned; §§§ Participants were advised to lose weight if they had a BMI>28kg/m<sup>2</sup>.

¶ Range of values; ¶¶ median and interquartile range (IQR); ¶¶¶ Actual GI/GL or if not available, planned;

\* Calculated before dropout; \*\*Completer Analysis, as used in data analysis; \*\*\* completer analysis, data obtained from authors; \*\*\*\* based on less participants than in analysis;

+ approximate based on all study arms; ¥ approximate based on test meals; ‡ approximate based on n=45 from Sloth et al. 2004, the original publication of this study;

‡‡‡ analysis includes weight loss and weight maintenance phases

**Supplemental Table S5: Sensitivity analysis of the systematic removal of each trial\***

|                              | MD [95% CI], P-value<br>I <sup>2</sup> , P-value |                                                  |                                                |                                               |                                                 |                                                 |
|------------------------------|--------------------------------------------------|--------------------------------------------------|------------------------------------------------|-----------------------------------------------|-------------------------------------------------|-------------------------------------------------|
|                              | Body Weight (kg)<br>N=32                         | BMI (kg/m <sup>2</sup> )<br>N=18                 | Body Fat (%)<br>N=10                           | Waist Circumference (cm)<br>N=18              | Waist-to-hip Ratio<br>N=6                       | Sagittal Abdominal Diameter (cm)<br>N=3         |
| All studies                  | -0.63 [-0.84, -0.42],<br>P<0.01<br>0.00%, P=0.51 | -0.26 [-0.36, -0.16],<br>P<0.01<br>0.00%, P=0.91 | -0.01 [-0.58, 0.56],<br>P=0.98<br>65%, P=0.003 | -0.46 [-1.05, 0.14],<br>P=0.13<br>62%, P<0.01 | -0.00 [-0.01, 0.00],<br>P=0.27<br>0.00%, P=0.52 | -0.09 [-0.34, 0.16],<br>P=0.48<br>0.00%, P=0.92 |
| <b>Removal of:</b>           |                                                  |                                                  |                                                |                                               |                                                 |                                                 |
| OW/OB                        |                                                  |                                                  |                                                |                                               |                                                 |                                                 |
| Pereira et al. 2015          | -0.61 [-0.82, -0.39],<br>P<0.01<br>0.00%, P=0.54 | -0.24 [-0.34, -0.14],<br>P<0.01<br>0.00%, P=0.93 | 0.19 [-0.25, 0.63],<br>P=0.39<br>36%, P=0.13   | -0.37 [-1.04, 0.31],<br>P=0.28<br>62%, P<0.01 | -0.00 [-0.01, 0.01],<br>P=0.67<br>0.00%, P=0.58 | n/a                                             |
| Karl et al. 2015             | -0.62 [-0.83, -0.41],<br>P<0.01<br>0.00%, P=0.50 | -0.25 [-0.35, -0.16],<br>P<0.01<br>0.00%, P=0.91 | 0.10 [-0.51, 0.71],<br>P=0.74<br>64%, P<0.01   | n/a                                           | n/a                                             | n/a                                             |
| Buscemi et al. 2013          | -0.63 [-0.84, -0.42],<br>P<0.01<br>0.00%, P=0.46 | -0.26 [-0.36, -0.16],<br>P<0.01<br>0.00%, P=0.86 | -0.08 [-0.63, 0.48],<br>P=0.79<br>64%, P<0.01  | -0.46 [-1.06, 0.15],<br>P=0.14<br>64%, P<0.01 | n/a                                             | n/a                                             |
| Costa et al. 2012            | -0.62 [-0.84, -0.41],<br>P<0.01<br>0.00%, P=0.46 | -0.26 [-0.37, -0.16],<br>P<0.01<br>0.00%, P=0.86 | -0.06 [-0.73, 0.61],<br>P=0.86<br>66%, P<0.01  | -0.33 [-0.94, 0.28],<br>P=0.29<br>59%, P<0.01 | n/a                                             | n/a                                             |
| Jebb et al. 2010 - LowFat    | -0.63 [-0.84, -0.42],<br>P<0.01<br>0.00%, P=0.46 | n/a                                              | n/a                                            | n/a                                           | n/a                                             | n/a                                             |
| Larsen et al. 2010 - LowPro  | -0.60 [-0.81, -0.38],<br>P<0.01<br>0.00%, P=0.57 | n/a                                              | n/a                                            | -0.45 [-1.09, 0.18],<br>P=0.16<br>64%, P<0.01 | n/a                                             | -0.05 [-0.39, 0.29],<br>P=0.79<br>0.00%, P=0.86 |
| Jebb et al. 2010- HighMUFA   | -0.64 [-0.85, -0.43],<br>P<0.01<br>0.00%, P=0.65 | n/a                                              | n/a                                            | n/a                                           | n/a                                             | n/a                                             |
| Larsen et al. 2010 - HighPro | -0.62 [-0.83, -0.41],<br>P<0.01<br>0.00%, P=0.48 | n/a                                              | n/a                                            | -0.37 [-1.00, 0.26],<br>P=0.26<br>62%, P<0.01 | n/a                                             | -0.13 [-0.45, 0.19],<br>P=0.42<br>0.00%, P=0.92 |
| Solomon et al. 2010          | -0.63 [-0.84, -0.42],<br>P<0.01                  | -0.26 [-0.36, -0.16],<br>P<0.01                  | n/a                                            | n/a                                           | n/a                                             | n/a                                             |

|                                      |                                                  |                                                  |                                               |                                                            |                                                 |                                                 |
|--------------------------------------|--------------------------------------------------|--------------------------------------------------|-----------------------------------------------|------------------------------------------------------------|-------------------------------------------------|-------------------------------------------------|
|                                      | 0.00%, P=0.47                                    | 0.00%, P=0.88                                    |                                               |                                                            |                                                 |                                                 |
| Philippou et al. 2009 - 6mth         | -0.65 [-0.86, -0.44],<br>P<0.01<br>0.00%, P=0.59 | -0.28 [-0.37, -0.18],<br>P<0.01<br>0.00%, P=0.97 | -0.12 [-0.71, 0.48],<br>P=0.70<br>65%, P<0.01 | -0.55 [-1.15, 0.04],<br>P=0.07<br>61%, P<0.01              | n/a                                             | n/a                                             |
| Philippou et al. 2009 - 4mth         | -0.61 [-0.83, -0.40],<br>P<0.01<br>0.00%, P=0.48 | -0.25 [-0.35, -0.15],<br>P<0.01<br>0.00%, P=0.89 | -0.09 [-0.72, 0.54],<br>P=0.78<br>66%, P<0.01 | -0.44 [-1.08, 0.19],<br>P=0.17<br>64%, P<0.01              | n/a                                             | n/a                                             |
| Abete et al. 2008                    | -0.63 [-0.84, -0.42],<br>P<0.01<br>0.00%, P=0.47 | n/a                                              | n/a                                           | n/a                                                        | n/a                                             | n/a                                             |
| Philippou et al. 2008                | -0.62 [-0.83, -0.42],<br>P<0.01<br>0.00%, P=0.48 | -0.26 [-0.35, -0.16],<br>P<0.01<br>0.00%, P=0.89 | -0.06 [-0.68, 0.55],<br>P=0.84<br>68%, P<0.01 | -0.41 [-1.02, 0.19],<br>P=0.18<br>63%, P<0.01              | n/a                                             | n/a                                             |
| Aston et al. 2008                    | -0.66 [-0.87, -0.44],<br>P<0.01<br>0.00%, P=0.52 | n/a                                              | -0.00 [-0.70, 0.69],<br>P=0.99<br>68%, P<0.01 | -0.54 [-1.14, 0.07],<br>P=0.08<br>62%, P<0.01              | n/a                                             | n/a                                             |
| Jensen et al. 2008                   | -0.63 [-0.84, -0.42],<br>P<0.01<br>0.00%, P=0.46 | -0.27 [-0.36, -0.17],<br>P<0.01<br>0.00%, P=0.88 | n/a                                           | -0.44 [-1.05, 0.18],<br>P=0.16<br>64%, P<0.01              | -0.00 [-0.01, 0.00],<br>P=0.24<br>0.00%, P=0.41 | -0.09 [-0.35, 0.18],<br>P=0.51<br>0.00%, P=0.69 |
| de Rougemont et al. 2007             | -0.57 [-0.80, -0.34],<br>P<0.01<br>0.00%, P=0.53 | -0.25 [-0.36, -0.14],<br>P<0.01<br>0.00%, P=0.87 | 0.06 [-0.57, 0.70],<br>P=0.84<br>67%, P<0.01  | n/a                                                        | n/a                                             | n/a                                             |
| Sichieri et al. 2007                 | -0.66 [-0.88, -0.45],<br>P<0.01<br>0.00%, P=0.53 | n/a                                              | n/a                                           | n/a                                                        | n/a                                             | n/a                                             |
| Bellisle et al. 2007                 | -0.63 [-0.84, -0.42],<br>P<0.01<br>0.00%, P=0.47 | -0.26 [-0.36, -0.16],<br>P<0.01<br>0.00%, P=0.88 | n/a                                           | -0.47 [-1.08, 0.13],<br>P=0.13<br>64%, P<0.01              | -0.00 [-0.01, 0.00],<br>P=0.14<br>0.00%, P=0.70 | n/a                                             |
| McMillan-Price et al. 2006 - HighCHO | -0.61 [-0.82, -0.39],<br>P<0.01<br>0.00%, P=0.51 | n/a                                              | n/a                                           | -0.38 [-1.01, 0.25],<br>P=0.23<br>63%, P<0.01              | n/a                                             | n/a                                             |
| McMillan-Price et al. 2006 - HighPro | -0.70 [-0.91, -0.49],<br>P<0.01<br>0.00%, P=0.91 | n/a                                              | n/a                                           | <b>-0.62 [-1.19, -0.05],<br/>P=0.03<br/>55%, P&lt;0.01</b> | n/a                                             | n/a                                             |
| Wolever et al. 2002                  | -0.63 [-0.84, -0.42],<br>P<0.01<br>0.00%, P=0.46 | n/a                                              | n/a                                           | n/a                                                        | n/a                                             | n/a                                             |
| Diabetes:                            |                                                  |                                                  |                                               |                                                            |                                                 |                                                 |
| Visek et al. 2014                    | -0.63 [-0.84, -0.42],<br>P<0.01                  | -0.26 [-0.36, -0.16],<br>P<0.01                  | 0.01 [-0.57, 0.60],<br>P=0.96                 | n/a                                                        | n/a                                             | n/a                                             |

|                          |                                                  |                                                  |             |                                                         |                                                 |     |
|--------------------------|--------------------------------------------------|--------------------------------------------------|-------------|---------------------------------------------------------|-------------------------------------------------|-----|
|                          | 0.00%, P=0.46                                    | 0.00%, P=0.86                                    | 68%, P<0.01 |                                                         |                                                 |     |
| Jenkins et al. 2014      | -0.66 [-0.88, -0.43],<br>P<0.01<br>0.00%, P=0.47 | -0.29 [-0.39, -0.18],<br>P<0.01<br>0.00%, P=0.94 | n/a         | <b>-0.61 [-1.18, -0.04],<br/>P=0.04<br/>50%, P=0.01</b> | -0.00 [-0.01, 0.00],<br>P=0.21<br>0.00%, P=0.43 | n/a |
| Jenkins et al. 2012      | -0.62 [-0.84, -0.40],<br>P<0.01<br>0.00%, P=0.46 | -0.25 [-0.35, -0.15],<br>P<0.01<br>0.00%, P=0.87 | n/a         | -0.44 [-1.05, 0.17],<br>P=0.16<br>64%, P<0.01           | -0.00 [-0.01, 0.01],<br>P=0.64<br>0.00%, P=0.53 | n/a |
| Yusof et al. 2009        | -0.63 [-0.84, -0.42],<br>P<0.01<br>0.00%, P=0.46 | -0.26 [-0.36, -0.16],<br>P<0.01<br>0.00%, P=0.87 | n/a         | -0.33 [-0.95, 0.28],<br>P=0.29<br>58%, P<0.01           | n/a                                             | n/a |
| Jenkins et al. 2008      | -0.61 [-0.83, -0.40],<br>P<0.01<br>0.00%, P=0.48 | -0.25 [-0.36, -0.15],<br>P<0.01<br>0.00%, P=0.87 | n/a         | n/a                                                     | n/a                                             | n/a |
| Wolever et al. 2008      | -0.64 [-0.84, -0.43],<br>P<0.01<br>0.00%, P=0.57 | n/a                                              | n/a         | -0.50 [-1.10, 0.09],<br>P=0.10<br>62%, P<0.01           | n/a                                             | n/a |
| Jimenez-Cruz et al. 2003 | -0.63 [-0.84, -0.42],<br>P<0.01<br>0.00%, P=0.46 | -0.26 [-0.35, -0.16],<br>P<0.01<br>0.00%, P=0.86 | n/a         | n/a                                                     | n/a                                             | n/a |
| Heilbronn et al. 2002    | -0.63 [-0.84, -0.42],<br>P<0.01<br>0.00%, P=0.47 | n/a                                              | n/a         | n/a                                                     | n/a                                             | n/a |
| Fontvieille et al. 1992  | -0.63 [-0.84, -0.42],<br>P<0.01<br>0.00%, P=0.46 | n/a                                              | n/a         | n/a                                                     | n/a                                             | n/a |
| Fontvielle et al. 1988   | -0.63 [-0.84, -0.42],<br>P<0.01<br>0.00%, P=0.46 | n/a                                              | n/a         | n/a                                                     | n/a                                             | n/a |
| <b>CHD</b>               |                                                  |                                                  |             |                                                         |                                                 |     |
| Frost et al. 2004        | -0.63 [-0.84, -0.42],<br>P<0.01<br>0.00%, P=0.47 | -0.26 [-0.36, -0.17],<br>P<0.01<br>0.00%, P=0.89 | n/a         | -0.48 [-1.09, 0.12],<br>P=0.12<br>63%, P<0.01           | -0.00 [-0.01, 0.00],<br>P=0.25<br>1%, P=0.40    | n/a |

\*Sensitivity analysis included the removal of each single study from the meta-analyses one at a time and the summary effect was recalculated. An influential outlier was considered a study whose removal changed the magnitude of the pooled effect by >10%. BMI, body mass index; CHD, coronary heart disease; CHO, carbohydrate; CI, confidence interval; MD, mean difference; mnth, month; MUFA, monounsaturated fatty acids; n/a, not applicable; OB, obese; OW, overweight; Pro, protein



**Supplemental Table S6: Sensitivity analyses of the use of correlation coefficients of 0.25 and 0.75 for crossover trials**

|                                       | MD (95% CI), P-value<br>I <sup>2</sup> , P-value        |                                                         |                                               |
|---------------------------------------|---------------------------------------------------------|---------------------------------------------------------|-----------------------------------------------|
|                                       | Correlation Coefficient<br>used in the Primary Analysis | Correlation Coefficient used in<br>Sensitivity Analyses |                                               |
| Outcome (no. crossover trials/total)  | 0.5                                                     | 0.25                                                    | 0.75                                          |
| Body Weight, kg (6*/32)               | -0.63 [-0.84, -0.42], P<0.01<br>0.00%, P=0.51           | -0.63 [-0.84, -0.42], P<0.01<br>0.00%, P=0.51           | -0.63 [-0.84, -0.43], P<0.01<br>0.00%, P=0.51 |
| BMI, kg/m <sup>2</sup> (3/18)         | -0.26 [-0.36, -0.16], P<0.01<br>0.00%, P=0.91           | -0.26 [-0.36, -0.16], P<0.01<br>0.00%, P=0.90           | -0.26 [-0.35, -0.17], P<0.01<br>0.00%, P=0.90 |
| Body Fat, % (3*/10)                   | -0.01 [-0.58, 0.56], P=0.98<br>65%, P<0.01              | -0.00 [-0.58, 0.58], P=0.99<br>64%, P<0.01              | -0.02 [-0.57, 0.54], P=0.96<br>66%, P<0.01    |
| Waist Circumference, cm (2*/18)       | -0.46 [-1.05, 0.14], P=0.13<br>62%, P<0.01              | -0.44 [-1.04, 0.15], P=0.14<br>60%, P<0.01              | -0.46 [-1.07, 0.14], P=0.13<br>65%, P<0.01    |
| Waist-to-hip Ratio (0/6)              | -0.00 [-0.01, 0.00], P=0.27<br>0.00%, P=0.52            | n/a                                                     | n/a                                           |
| Sagittal Abdominal Diameter, cm (0/6) | -0.09 [-0.34, 0.16], P=0.48<br>0.00%, P=0.92            | n/a                                                     | n/a                                           |

\*One of these crossover trials did not require the use of a correlation coefficient as complete data was available

BMI, body mass index; CI, confidence interval; MD, mean difference; no., number

**Supplement Table S7. Continuous meta-regression analysis for the effect of pasta in the context of low-GI dietary patterns on body weight (kg)<sup>1</sup>**

| Subgroup                                 | Range                         | No. trials | N    | $\beta$ (95% CI)     | Residual I <sup>2</sup> | P value      |
|------------------------------------------|-------------------------------|------------|------|----------------------|-------------------------|--------------|
| Baseline BMI                             | 24.1 – 37.1 kg/m <sup>2</sup> | 32         | 2448 | -0.04 (-0.13, 0.06)  | 0.00%                   | 0.454        |
| Follow-up                                | 3 – 72 wks                    | 32         | 2448 | 0.01 (-0.01, 0.02)   | 0.00%                   | 0.314        |
| Dose Pasta                               | 1.75 – 7.0 serv/wk            | 11         | 740  | 0.29 (-0.91, 1.50)   | 0.00%                   | 0.595        |
| GI <sup>3</sup>                          | 21 - 72                       | 31         | 2383 | -0.01 (-0.04, 0.02)  | 0.45%                   | 0.482        |
| Difference in GI <sup>2</sup>            | 4.9 - 40.2                    | 31         | 2383 | -0.00 (-0.04, 0.03)  | 2.75%                   | 0.811        |
| Fiber <sup>3</sup>                       | 8.0 - 39.4g/d                 | 27         | 1851 | 0.02 (-0.01, 0.06)   | 0.00%                   | 0.221        |
| Change in Fiber <sup>4</sup>             | -7.5 - +13.8g/d               | 17         | 1571 | -0.02 (-0.07, 0.04)  | 23.13%                  | 0.595        |
| Difference in Fiber <sup>2</sup>         | -8.5 - +15.3g/d               | 27         | 1851 | -0.01 (-0.06, 0.04)  | 0.00%                   | 0.701        |
| Saturated Fat <sup>3</sup>               | 5.1 - 12.5%                   | 14         | 1396 | -0.05 (-0.30, 0.20)  | 34.32%                  | 0.648        |
| Change in Saturated Fat <sup>4</sup>     | -8.2 - -1.2%                  | 12         | 1309 | -0.01 (-0.29, 0.28)  | 46.27%                  | 0.965        |
| Difference in Saturated Fat <sup>2</sup> | -2.0 - +2.3%                  | 14         | 1396 | -0.34 (-1.08, 0.39)  | 32.80%                  | 0.329        |
| CHO <sup>3</sup>                         | 37.2 - 68.0%                  | 30         | 2345 | -0.01 (-0.05, 0.03)  | 0.00%                   | 0.541        |
| Change in CHO <sup>4</sup>               | -7.2 - +10.1%                 | 19         | 2046 | -0.07 (-0.12, -0.01) | 0.00%                   | <b>0.016</b> |
| Difference in CHO <sup>2</sup>           | -11.1 - +5.4%                 | 30         | 2345 | 0.02 (-0.05, 0.10)   | 0.00%                   | 0.547        |
| Protein <sup>3</sup>                     | 13.3 - 26.1%                  | 30         | 2345 | 0.04 (-0.04, 0.12)   | 0.00%                   | 0.332        |

|                                    |               |    |      |                     |        |              |
|------------------------------------|---------------|----|------|---------------------|--------|--------------|
| Change in Protein <sup>4</sup>     | -0.5 - +8.6%  | 19 | 2046 | 0.15 (0.03, 0.27)   | 0.00%  | <b>0.017</b> |
| Difference in Protein <sup>2</sup> | -2.5 - +3.4%  | 30 | 2345 | -0.18 (-0.38, 0.02) | 0.00%  | 0.069        |
| Fat <sup>3</sup>                   | 16.0 - 37.7%  | 30 | 2345 | 0.01 (-0.05, 0.06)  | 0.00%  | 0.852        |
| Change in Fat <sup>4</sup>         | -12.2 - +5.4% | 19 | 2046 | 0.05 (-0.02, 0.12)  | 17.73% | 0.122        |
| Difference in Fat <sup>2</sup>     | -4.4 - +10.6% | 30 | 2345 | 0.02 (-0.05, 0.09)  | 0.00%  | 0.610        |

1 Data is presented as between group mean difference (95% CI) for a 1-unit change in the predictor variable.  $\beta$ -coefficients were estimated using continuous meta-regression analysis. A positive  $\beta$ -coefficient implies an increase in body weight on the pasta/low-GI intervention as the subgroup variable increases, and a negative  $\beta$ -coefficient implies a decrease in body weight. Residual  $I^2$  reports inter-study heterogeneity not explained by the subgroup and was estimated using the Cochran Q statistic. BMI, body mass index; CHO, carbohydrate; GI, glycemic index

2 Difference in diet variable between the intervention and control arms

3 Intake at the end of study in the intervention arm

4 Change in intake from end of study from baseline in intervention arm

**Supplemental Table S8. Continuous meta-regression analysis for the effect of pasta in the context of low-GI dietary patterns on BMI (kg/m<sup>2</sup>)<sup>1</sup>**

| <b>Subgroup</b>                           | <b>Range</b>                  | <b>No. trials</b> | <b>N</b> | <b>β (95% CI)</b>   | <b>Residual I<sup>2</sup></b> | <b>P value</b> |
|-------------------------------------------|-------------------------------|-------------------|----------|---------------------|-------------------------------|----------------|
| Baseline BMI                              | 26.3 – 37.1 kg/m <sup>2</sup> | 18                | 1038     | -0.01 (-0.06, 0.03) | 0.00%                         | 0.559          |
| Follow-up                                 | 4 – 24 wks                    | 18                | 1038     | 0.00 (-0.01, 0.02)  | 0.00%                         | 0.559          |
| Dose Pasta*                               | 2.33 – 7.0 serv/wk            | 4                 | 143      |                     |                               |                |
| GI <sup>3</sup>                           | 39.8 - 72                     | 17                | 973      | 0.01 (-0.01, 0.03)  | 0.00%                         | 0.153          |
| Difference in GI <sup>2</sup>             | 7.0 - 40.2                    | 17                | 973      | -0.01 (-0.03, 0.01) | 0.00%                         | 0.275          |
| Fiber <sup>3</sup>                        | 8.0 - 39.4g/d                 | 16                | 935      | 0.01 (-0.01, 0.02)  | 0.00%                         | 0.366          |
| Change in Fiber <sup>4</sup>              | -1.8 - +12.4g/d               | 10                | 758      | 0.00 (-0.03, 0.03)  | 0.00%                         | 0.846          |
| Difference in Fiber <sup>2</sup>          | -4.9 - +13.0g/d               | 16                | 935      | -0.00 (-0.02, 0.02) | 0.00%                         | 0.821          |
| Saturated Fat* <sup>3</sup>               | 7.6 - 12.5%                   | 7                 |          |                     |                               |                |
| Change in Saturated Fat* <sup>4</sup>     | -2.4 - -1.2%                  | 6                 |          |                     |                               |                |
| Difference in Saturated Fat* <sup>2</sup> | -1.0 - +2.3%                  | 7                 |          |                     |                               |                |
| CHO <sup>3</sup>                          | 37.2 - 68.0%                  | 16                | 935      | -0.00 (-0.02, 0.01) | 0.00%                         | 0.594          |
| Change in CHO <sup>4</sup>                | -5.6 - +3.2%                  | 10                | 758      | -0.02 (-0.06, 0.02) | 0.00%                         | 0.325          |
| Difference in CHO <sup>2</sup>            | -11.1 - +2.0%                 | 16                | 935      | -0.01 (-0.03, 0.02) | 0.00%                         | 0.531          |
| Protein <sup>3</sup>                      | 13.9 – 22.8%                  | 16                | 935      | 0.00 (-0.04, 0.04)  | 0.00%                         | 0.905          |

|                                    |               |    |     |                     |       |       |
|------------------------------------|---------------|----|-----|---------------------|-------|-------|
| Change in Protein <sup>4</sup>     | -0.2 - +3.0%  | 10 | 758 | 0.01 (-0.11, 0.14)  | 0.00% | 0.786 |
| Difference in Protein <sup>2</sup> | -2.5 - +3.4%  | 16 | 935 | -0.03 (-0.12, 0.06) | 0.00% | 0.441 |
| Fat <sup>3</sup>                   | 16.0 - 37.7%  | 16 | 935 | 0.00 (-0.02, 0.02)  | 0.00% | 0.717 |
| Change in Fat <sup>4</sup>         | -4.8 - +5.4%  | 10 | 758 | 0.02 (-0.02, 0.06)  | 0.00% | 0.240 |
| Difference in Fat <sup>2</sup>     | -4.4 - +10.6% | 16 | 935 | 0.01 (-0.01, 0.04)  | 0.00% | 0.299 |

\*For Dose, there were <10 trials so subgroup analyses were not performed.

1 Data is presented as between group mean difference (95% CI) for a 1-unit change in the predictor variable.  $\beta$ -coefficients were estimated using continuous meta-regression analysis. A positive  $\beta$ -coefficient implies an increase in BMI on the pasta/low-GI intervention as the subgroup variable increases, and a negative  $\beta$ -coefficient implies a decrease in BMI. Residual  $I^2$  reports inter-study heterogeneity not explained by the subgroup and was estimated using the Cochran Q statistic. BMI, body mass index; CHO, carbohydrate; GI, glycemic index; wk, week

2 Difference in diet variable between the intervention and control arms

3 Intake at the end of study in the intervention arm

4 Change in intake from end of study from baseline in intervention arm

**Supplemental Table S9. Continuous meta-regression analysis for the effect of pasta in the context of low-GI dietary patterns on body fat (%)<sup>1</sup>**

| Subgroup                                  | Range                            | No. trials | N   | $\beta$ (95% CI)     | Residual I <sup>2</sup> | P value      |
|-------------------------------------------|----------------------------------|------------|-----|----------------------|-------------------------|--------------|
| Baseline BMI                              | 26.3 – 36.0<br>kg/m <sup>2</sup> | 10         | 285 | -0.02 (-0.26, 0.23)  | 67.69%                  | 0.890        |
| Follow-up                                 | 4 – 24 wks                       | 10         | 285 | 0.06 (-0.06, 0.17)   | 66.00%                  | 0.303        |
| Dose Pasta*                               | 2.33 - 3.33<br>serv/wk           | 3          | 96  |                      |                         |              |
| GI <sup>3</sup>                           | 39.8 - 72                        | 10         | 285 | 0.12 (-0.00, 0.25)   | 52.21%                  | 0.053        |
| Difference in GI <sup>2</sup>             | 7.0 - 40.2                       | 10         | 285 | -0.09 (-0.15, -0.03) | 19.39%                  | <b>0.008</b> |
| Fiber* <sup>3</sup>                       | 8.0 - 39.4g/d                    | 8          | 228 |                      |                         |              |
| Change in Fiber* <sup>4</sup>             | -1.8 - +12.4g/d                  | 4          | 87  |                      |                         |              |
| Difference in Fiber* <sup>2</sup>         | -4.9 - +13.0g/d                  | 8          | 228 |                      |                         |              |
| Saturated Fat* <sup>3</sup>               | 7.6 - 12.5%                      | 3          | 93  |                      |                         |              |
| Change in Saturated Fat* <sup>4</sup>     | -2.4 - -1.2%                     | 2          | 51  |                      |                         |              |
| Difference in Saturated Fat* <sup>2</sup> | -1.0 - +2.3%                     | 3          | 93  |                      |                         |              |
| CHO* <sup>3</sup>                         | 37.2 - 68.0%                     | 9          | 247 |                      |                         |              |
| Change in CHO* <sup>4</sup>               | -5.6 - +3.2%                     | 4          | 87  |                      |                         |              |
| Difference in CHO* <sup>2</sup>           | -11.1 - +2.0%                    | 9          | 247 |                      |                         |              |
| Protein* <sup>3</sup>                     | 13.9 – 22.8%                     | 9          | 247 |                      |                         |              |

|                                     |               |   |     |  |  |  |
|-------------------------------------|---------------|---|-----|--|--|--|
| Change in Protein* <sup>4</sup>     | -0.2 - +3.0%  | 4 | 87  |  |  |  |
| Difference in Protein* <sup>2</sup> | -2.5 - +3.4%  | 9 | 247 |  |  |  |
| Fat* <sup>3</sup>                   | 16.0 - 37.7%  | 9 | 247 |  |  |  |
| Change in Fat* <sup>4</sup>         | -4.8 - +5.4%  | 4 | 87  |  |  |  |
| Difference in Fat* <sup>2</sup>     | -4.4 - +10.6% | 9 | 247 |  |  |  |

\*There were <10 trials so subgroup analyses were not performed.

1 Data is presented as between group mean difference (95% CI) for a 1-unit change in the predictor variable.  $\beta$ -coefficients were estimated using continuous meta-regression analysis. A positive  $\beta$ -coefficient implies an increase in body fat on the pasta/low-GI intervention as the subgroup variable increases, and a negative  $\beta$ -coefficient implies a decrease in body fat. Residual  $I^2$  reports inter-study heterogeneity not explained by the subgroup and was estimated using the Cochran Q statistic. BMI, body mass index; CHO, carbohydrate; GI, glycemic index; wk, week

2 Difference in diet variable between the intervention and control arms

3 Intake at the end of study in the intervention arm

4 Change in intake from end of study from baseline in intervention arm

**Supplemental Table S10. Continuous meta-regression analysis for the effect of pasta in the context of low-GI dietary patterns on waist circumference (cm)<sup>1</sup>**

| Subgroup                                  | Range                         | No. trials | N    | $\beta$ (95% CI)     | Residual I <sup>2</sup> | P value      |
|-------------------------------------------|-------------------------------|------------|------|----------------------|-------------------------|--------------|
| Baseline BMI                              | 26.3 – 36.0 kg/m <sup>2</sup> | 18         | 1380 | 0.10 (-0.13, 0.32)   | 59.02%                  | 0.372        |
| Follow-up                                 | 4 – 52 wks                    | 18         | 1380 | 0.05 (-0.03, 0.13)   | 60.50%                  | 0.225        |
| Dose Pasta*                               | 3.0 – 3.33 serv/wk            | 2          | 63   |                      |                         |              |
| GI <sup>3</sup>                           | 41.2 – 72.0                   | 17         | 1315 | -0.01 (-0.12, 0.10)  | 66.00%                  | 0.841        |
| Difference in GI <sup>2</sup>             | 4.9 – 32.9                    | 17         | 1315 | -0.02 (-0.10, 0.06)  | 64.51%                  | 0.596        |
| Fiber <sup>3</sup>                        | 8.0 - 39.4g/d                 | 15         | 1258 | 0.05 (-0.05, 0.14)   | 59.60%                  | 0.342        |
| Change in Fiber <sup>4</sup>              | -1.8 - +13.8g/d               | 13         | 1176 | 0.01 (-0.17, 0.20)   | 70.59%                  | 0.861        |
| Difference in Fiber <sup>2</sup>          | -4.9 - +15.3g/d               | 15         | 1258 | -0.00 (-0.14, 0.13)  | 64.86%                  | 0.939        |
| Saturated Fat* <sup>3</sup>               | 6.1 – 10.1%                   | 8          | 604  |                      |                         |              |
| Change in Saturated Fat* <sup>4</sup>     | -7.6 - -1.2%                  | 7          | 562  |                      |                         |              |
| Difference in Saturated Fat* <sup>2</sup> | -2.0 - +2.3%                  | 8          | 604  |                      |                         |              |
| CHO <sup>3</sup>                          | 38.5 - 58.6%                  | 16         | 1277 | -0.11 (-0.19, -0.04) | 27.06%                  | <b>0.007</b> |
| Change in CHO <sup>4</sup>                | -7.2 - +10.1%                 | 13         | 1176 | -0.09 (-0.23, 0.04)  | 57.19%                  | 0.148        |
| Difference in CHO <sup>2</sup>            | -11.1 - +5.4%                 | 16         | 1277 | -0.01 (-0.18, 0.17)  | 60.81%                  | 0.947        |
| Protein <sup>3</sup>                      | 13.9 – 26.1%                  | 16         | 1277 | 0.20 (0.01, 0.38)    | 43.92%                  | <b>0.038</b> |



|                                    |               |    |      |                     |        |       |
|------------------------------------|---------------|----|------|---------------------|--------|-------|
| Change in Protein <sup>4</sup>     | -0.3 - +8.6%  | 13 | 1176 | 0.19 (-0.09, 0.46)  | 63.38% | 0.165 |
| Difference in Protein <sup>2</sup> | -2.5 - +3.4%  | 16 | 1277 | -0.14 (-0.66, 0.38) | 62.79% | 0.570 |
| Fat <sup>3</sup>                   | 22.0 - 37.2%  | 16 | 1277 | 0.10 (-0.05, 0.26)  | 53.48% | 0.185 |
| Change in Fat <sup>4</sup>         | -12.2 - +5.4% | 13 | 1176 | 0.08 (-0.07, 0.24)  | 61.15% | 0.274 |
| Difference in Fat <sup>2</sup>     | -4.4 - +10.6% | 16 | 1277 | 0.09 (-0.06, 0.25)  | 47.17% | 0.220 |

\*There were <10 trials so subgroup analyses were not performed.

1 Data is presented as between group mean difference (95% CI) for a 1-unit change in the predictor variable.  $\beta$ -coefficients were estimated using continuous meta-regression analysis. A positive  $\beta$ -coefficient implies an increase in waist circumference on the pasta/low-GI intervention as the subgroup variable increases, and a negative  $\beta$ -coefficient implies a decrease in waist circumference. Residual  $I^2$  reports inter-study heterogeneity not explained by the subgroup and was estimated using the Cochran Q statistic. BMI, body mass index; CHO, carbohydrate; GI, glycemic index; wk, week

2 Difference in diet variable between the intervention and control arms

3 Intake at the end of study in the intervention arm

4 Change in intake from end of study from baseline in intervention arm

**Supplementary Table S11. Post-hoc piecewise linear continuous dose-response meta-regression analyses for the effect of pasta intake in the context of low-GI dietary patterns on body weight (kg)**

| <b>Dose threshold of servings of pasta consumed per week</b> | <b>Dose ranges of servings of pasta consumed per week</b> | <b><math>\beta</math> (95% CIs) *</b> | <b>Residual <math>I^2</math> †</b> | <b><i>p</i>-value</b> |
|--------------------------------------------------------------|-----------------------------------------------------------|---------------------------------------|------------------------------------|-----------------------|
| 3.0                                                          | $\leq 3.0$                                                | -0.70 (-3.27, 1.86)                   | 0.00%                              | 0.890                 |
|                                                              | $> 3.0$                                                   | 0.91 (-0.89, 2.70)                    |                                    |                       |
| 3.33                                                         | $\leq 3.33$                                               | 0.05 (-1.80, 1.89)                    | 0.00%                              | 0.518                 |
|                                                              | $> 3.33$                                                  | 0.44 (-1.75, 2.63)                    |                                    |                       |
| 3.5                                                          | $\leq 3.5$                                                | 0.09 (-1.65, 1.82)                    | 0.00%                              | 0.888                 |
|                                                              | $> 3.5$                                                   | 0.46 (-1.89, 2.81)                    |                                    |                       |

\*  $\beta$  is the slope derived from the piecewise linear meta-regression analyses and represents the treatment effect on body weight for doses above and below each dose-threshold representing servings of pasta consumption per week; † The residual  $I^2$  value indicates heterogeneity unexplained by each dose-threshold.

**Supplementary Table S12: GRADE assessment of study quality**

| Quality assessment*                                     |                   |              |                      |                      |             |                  | № of patients  |                | Effect                                               | Quality Importance                                                                |
|---------------------------------------------------------|-------------------|--------------|----------------------|----------------------|-------------|------------------|----------------|----------------|------------------------------------------------------|-----------------------------------------------------------------------------------|
| № of studies                                            | Design            | Risk of bias | Inconsistency        | Indirectness         | Imprecision | Publication Bias | Pasta/LGI diet | Higher GI diet | Absolute (95% CI)                                    |                                                                                   |
| <b>Body Weight (follow up: median 12 weeks)</b>         |                   |              |                      |                      |             |                  |                |                |                                                      |                                                                                   |
| 32                                                      | randomised trials | not serious  | not serious          | serious <sup>a</sup> | not serious | none             | 1294           | 1228           | MD <b>-0.63 kg</b><br>(-0.84 to -0.42)               | ⊕⊕⊕○<br>MODERATE <sup>a</sup><br>Due to downgrade for indirectness                |
| <b>BMI (follow up: median 12 weeks)</b>                 |                   |              |                      |                      |             |                  |                |                |                                                      |                                                                                   |
| 18                                                      | randomised trials | not serious  | not serious          | serious <sup>a</sup> | not serious | none             | 551            | 538            | MD <b>-0.26 kg/m<sup>2</sup></b><br>(-0.36 to -0.16) | ⊕⊕⊕○<br>MODERATE <sup>a</sup><br>Due to downgrade for indirectness                |
| <b>Waist Circumference (follow up: median 12 weeks)</b> |                   |              |                      |                      |             |                  |                |                |                                                      |                                                                                   |
| 18                                                      | randomised trials | not serious  | serious <sup>b</sup> | serious <sup>a</sup> | not serious | none             | 717            | 624            | MD <b>-0.46 cm</b><br>(-1.05 to 0.14)                | ⊕⊕○○<br>LOW <sup>a,b</sup><br>Due to downgrade for inconsistency and indirectness |

| Quality assessment*                                             |                   |              |                      |                      |             |                   | Nº of patients |                | Effect                                | Quality Importance                                                                |
|-----------------------------------------------------------------|-------------------|--------------|----------------------|----------------------|-------------|-------------------|----------------|----------------|---------------------------------------|-----------------------------------------------------------------------------------|
| Nº of studies                                                   | Design            | Risk of bias | Inconsistency        | Indirectness         | Imprecision | Publication Bias  | Pasta/LGI diet | Higher GI diet | Absolute (95% CI)                     |                                                                                   |
| <b>Body Fat (follow up: median 12 weeks)</b>                    |                   |              |                      |                      |             |                   |                |                |                                       |                                                                                   |
| 10                                                              | randomised trials | not serious  | serious <sup>c</sup> | serious <sup>a</sup> | not serious | none              | 176            | 165            | MD <b>-0.01 %</b><br>(-0.58 to 0.56)  | ⊕⊕○○<br>LOW <sup>a,c</sup><br>Due to downgrade for inconsistency and indirectness |
| <b>Waist-to-hip Ratio (follow up: median 12 weeks)</b>          |                   |              |                      |                      |             |                   |                |                |                                       |                                                                                   |
| 6                                                               | randomised trials | not serious  | not serious          | serious <sup>a</sup> | not serious | none <sup>d</sup> | 223            | 222            | MD <b>-0.00</b><br>(-0.01 to 0.00)    | ⊕⊕⊕○<br>MODERATE <sup>a</sup><br>Due to downgrade for indirectness                |
| <b>Sagittal Abdominal Diameter (follow up: median 26 weeks)</b> |                   |              |                      |                      |             |                   |                |                |                                       |                                                                                   |
| 3                                                               | randomised trials | not serious  | not serious          | serious <sup>a</sup> | not serious | none <sup>d</sup> | 237            | 214            | MD <b>-0.09 cm</b><br>(-0.34 to 0.16) | ⊕⊕⊕○<br>MODERATE <sup>a</sup><br>Due to downgrade for indirectness                |

CI, Confidence interval; GI, glycemic index; LGI, low glycemic index; MD, Mean difference

\*All outcomes started with high quality evidence since all studies were randomized controlled trials. Risk of Bias –We rated down for risk of bias if the majority of studies were considered to be at high risk of bias. Inconsistency – We assessed inconsistency using  $I^2$  estimates where an  $I^2=50\%$ ,  $P<0.10$  or higher indicates substantial heterogeneity.  $I^2$  is the percentage of variability in the treatment estimates that is attributable to heterogeneity between studies. We rated down for inconsistency if there was substantial heterogeneity that was unexplained by any a priori sensitivity or subgroup analyses. Indirectness – We rated down for indirectness if there were factors present relating to the participants, interventions, or outcomes that limited the generalizability of the results. Imprecision – We rated down for imprecision if the 95% confidence interval (95% CI) crossed the minimally important difference (MID) for harm. MIDs used for each outcome were: 0.5kg for body weight (based on Johnston et al. JAMA 2014;312(9):923-33);  $0.2\text{kg/m}^2$  for BMI; 2.0cm for waist circumference; 2.0% for body fat; 0.02 for waist-to-hip ratio; 2.0cm for sagittal abdominal diameter.

a. Downgrade for serious indirectness, since most of the available trials did not quantify the amount of pasta consumed in the context of the low-GI dietary patterns

b. Downgrade for serious inconsistency, as there was evidence of substantial inter-study ( $I^2=62\%$ ,  $P\text{-heterogeneity}<0.001$ ), which could not be explained

c. Downgrade for serious inconsistency, as there was evidence of substantial inter-study ( $I^2=65\%$ ,  $P\text{-heterogeneity}=0.003$ ), which could not be explained

d. No downgrade for publication bias, as publication bias could not be assessed due to lack of power for assessing funnel plot asymmetry and small study effects (<10 trials included in the meta-analysis)

## Supplemental Figures

Supplemental Figure S1: Cochrane risk of bias summary for all included trials

|                             | Random Sequence Generation | Allocation Concealment | Blinding of Participants, Personnel and Outcome Assessment | Incomplete Outcome Data | Selective Reporting |                                     | Random Sequence Generation | Allocation Concealment | Blinding of Participants, Personnel and Outcome Assessment | Incomplete Outcome Data | Selective Reporting |
|-----------------------------|----------------------------|------------------------|------------------------------------------------------------|-------------------------|---------------------|-------------------------------------|----------------------------|------------------------|------------------------------------------------------------|-------------------------|---------------------|
| Abete et al. 2008           | ?                          | ?                      | ?                                                          | +                       | +                   | Jimenez-Cruz et al. 2003            | ?                          | ?                      | ?                                                          | ?                       | +                   |
| Aston et al. 2008           | +                          | ?                      | +                                                          | +                       | +                   | Karl et al. 2015                    | +                          | +                      | +                                                          | +                       | +                   |
| Bellisle et al. 2007        | ?                          | ?                      | ?                                                          | ?                       | +                   | Larsen et al. 2010 -LowPro          | +                          | +                      | +                                                          | +                       | +                   |
| Buscemi et al. 2012         | +                          | +                      | +                                                          | ?                       | +                   | Larsen et al. 2010 -HighPro         | +                          | +                      | +                                                          | +                       | +                   |
| Cost et al. 2012            | ?                          | ?                      | +                                                          | +                       | +                   | McMillan-Price et al. 2006- HighCHO | ?                          | ?                      | +                                                          | +                       | +                   |
| de Rougemont et al. 2007    | ?                          | +                      | +                                                          | +                       | +                   | McMillan-Price et al. 2006- HighPro | ?                          | ?                      | +                                                          | +                       | +                   |
| Fontvielle et al. 1992      | ?                          | ?                      | +                                                          | +                       | +                   | Pereira et al. 2015                 | ?                          | ?                      | +                                                          | ?                       | +                   |
| Fontvielle et al. 1988      | ?                          | ?                      | +                                                          | +                       | +                   | Philippou et al. 2008               | ?                          | ?                      | +                                                          | ?                       | +                   |
| Frost et al. 2004           | ?                          | ?                      | +                                                          | +                       | +                   | Philippou et al. 2009-4mo           | ?                          | ?                      | +                                                          | ?                       | +                   |
| Heilbronn et al. 2002       | ?                          | ?                      | +                                                          | ?                       | +                   | Philippou et al. 2009-6mo           | ?                          | ?                      | ?                                                          | ?                       | +                   |
| Jebb et al. 2010 - HighMUFA | +                          | ?                      | +                                                          | ?                       | +                   | Sicheri et al. 2007                 | +                          | ?                      | +                                                          | ?                       | +                   |
| Jebb et al. 2010 - LowFat   | +                          | ?                      | +                                                          | ?                       | +                   | Solomon et al. 2010                 | ?                          | ?                      | +                                                          | +                       | +                   |
| Jenkins et al. 2014         | +                          | +                      | +                                                          | +                       | +                   | Visek et al. 2014                   | ?                          | ?                      | +                                                          | +                       | +                   |
| Jenkins et al. 2012         | +                          | +                      | +                                                          | +                       | +                   | Wolever et al. 2008                 | +                          | +                      | ?                                                          | +                       | +                   |
| Jenkins et al. 2008         | +                          | +                      | +                                                          | +                       | +                   | Wolever et al. 2002                 | +                          | +                      | +                                                          | +                       | +                   |
| Jensen et al. 2008          | ?                          | ?                      | +                                                          | +                       | +                   | Yusof et al. 2009                   | +                          | ?                      | +                                                          | +                       | +                   |

Summary of risk of bias ratings for each individual trial included in the meta-analysis.

**Supplemental Figure S2: Risk of bias proportion graph for all included trials**

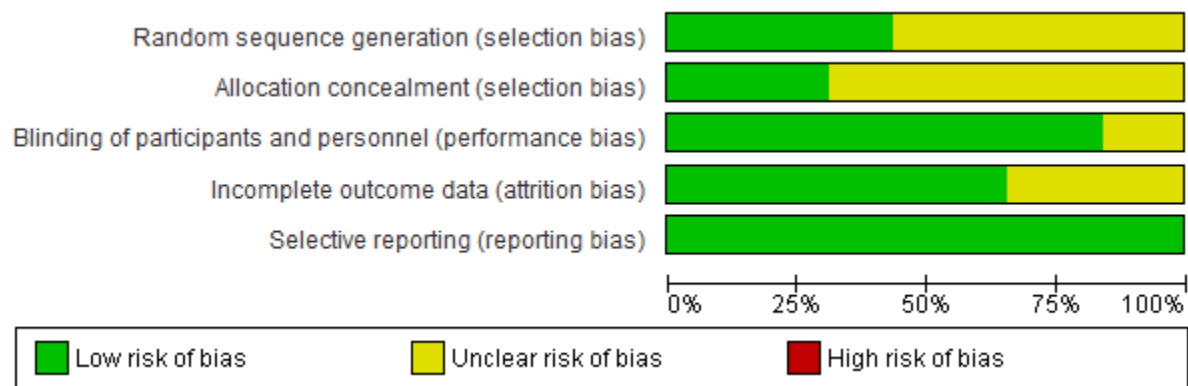

**Supplemental Figure S3: Forest plot of randomized controlled trials of the effect of pasta in the context of low-GI dietary patterns on BMI (kg/m<sup>2</sup>) (n= 1038).**

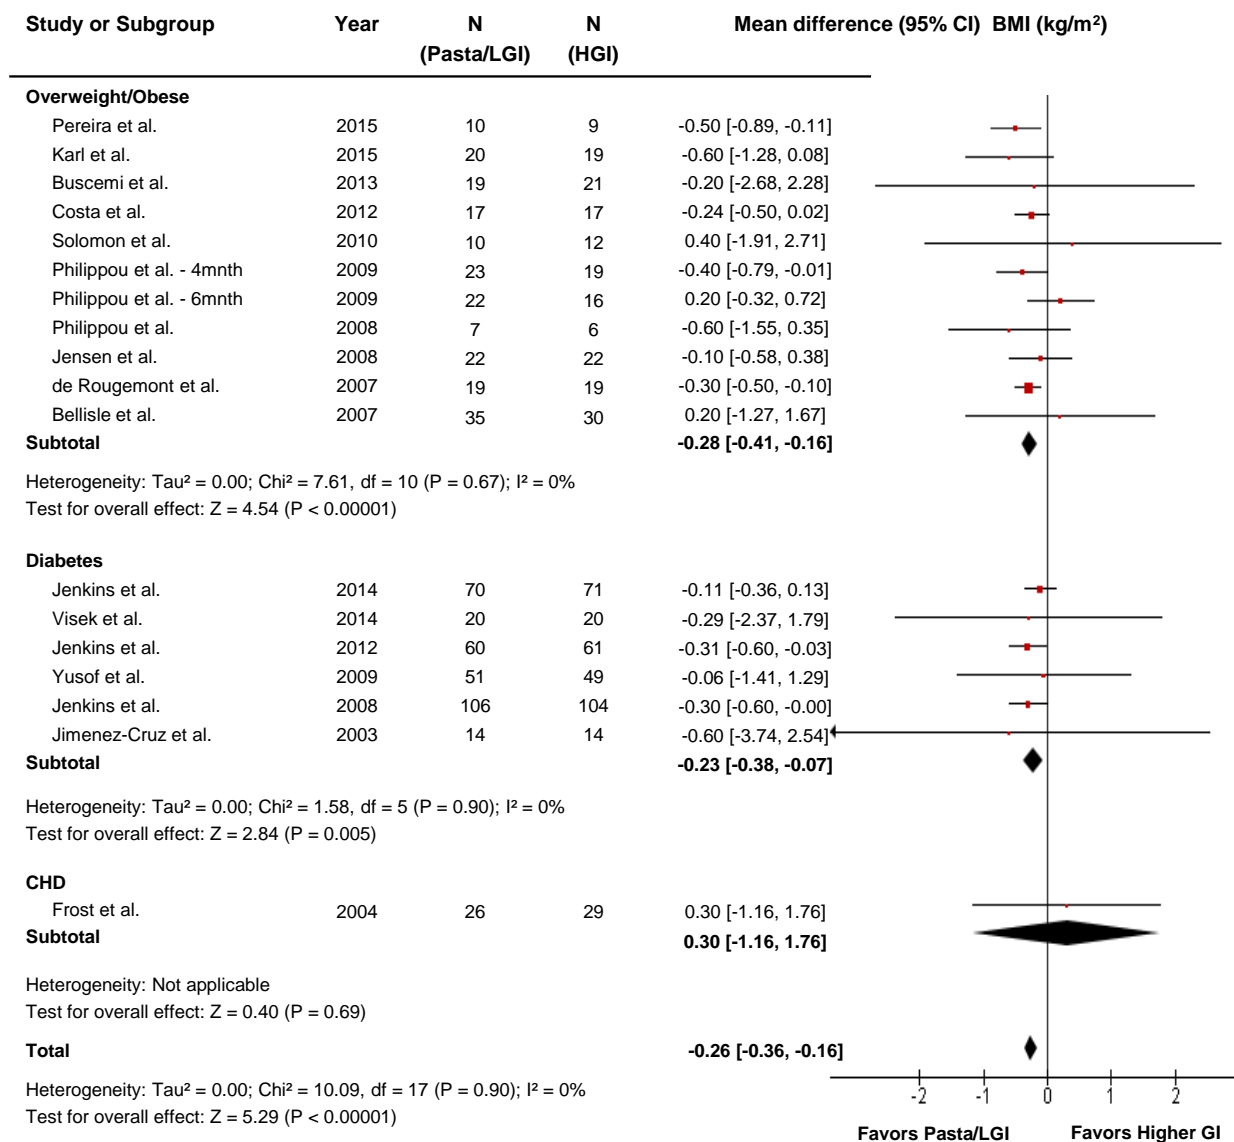

Data are expressed as mean differences represented by a square and 95% CIs by the line through the square. 95% CIs exceeding the plot's bounds are represented by an arrowhead. Pooled effect estimates are represented by diamonds and were estimated with the use of generic inverse variance random effects models. Between-study heterogeneity was assessed by the Cochran Q statistic, where P<0.10 is considered statistically significant, and quantified by the I<sup>2</sup> statistic, where I<sup>2</sup>≥50% is considered evidence of substantial heterogeneity. BMI, body mass index; CHD, coronary heart disease; CI, confidence interval; HGI, higher glycemic index diet; GI, glycemic index; LGI, low glycemic index diet



**Supplemental Figure S4: Forest plot of randomized controlled trials of the effect of pasta in the context of low-GI dietary patterns on body fat (%) (n= 285).**

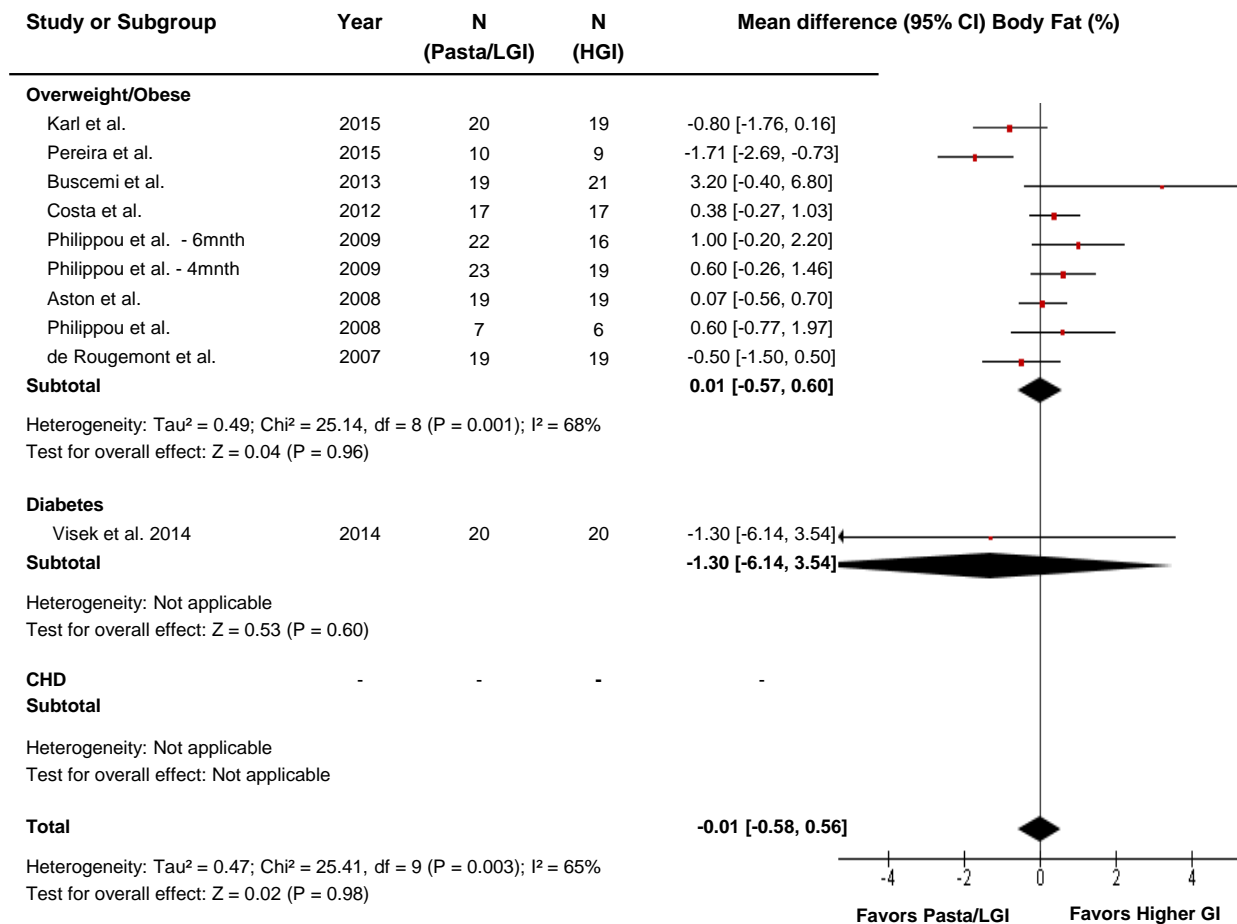

Data are expressed as mean differences represented by a square and 95% CIs by the line through the square. 95% CIs exceeding the plot's bounds are represented by an arrowhead. Pooled effect estimates are represented by diamonds and were estimated with the use of generic inverse variance random effects models. Between-study heterogeneity was assessed by the Cochran Q statistic, where  $P < 0.10$  is considered statistically significant and quantified by the  $I^2$  statistic, where  $I^2 \geq 50\%$  is considered evidence of substantial heterogeneity. CHD, coronary heart disease; CI, confidence interval; HGI, higher glycemic index diet; GI, glycemic index; LGI, low glycemic index diet

**Supplemental Figure S5: Forest plot of randomized controlled trials of the effect of pasta in the context of low-GI dietary patterns on waist circumference (cm) (n = 1380).**

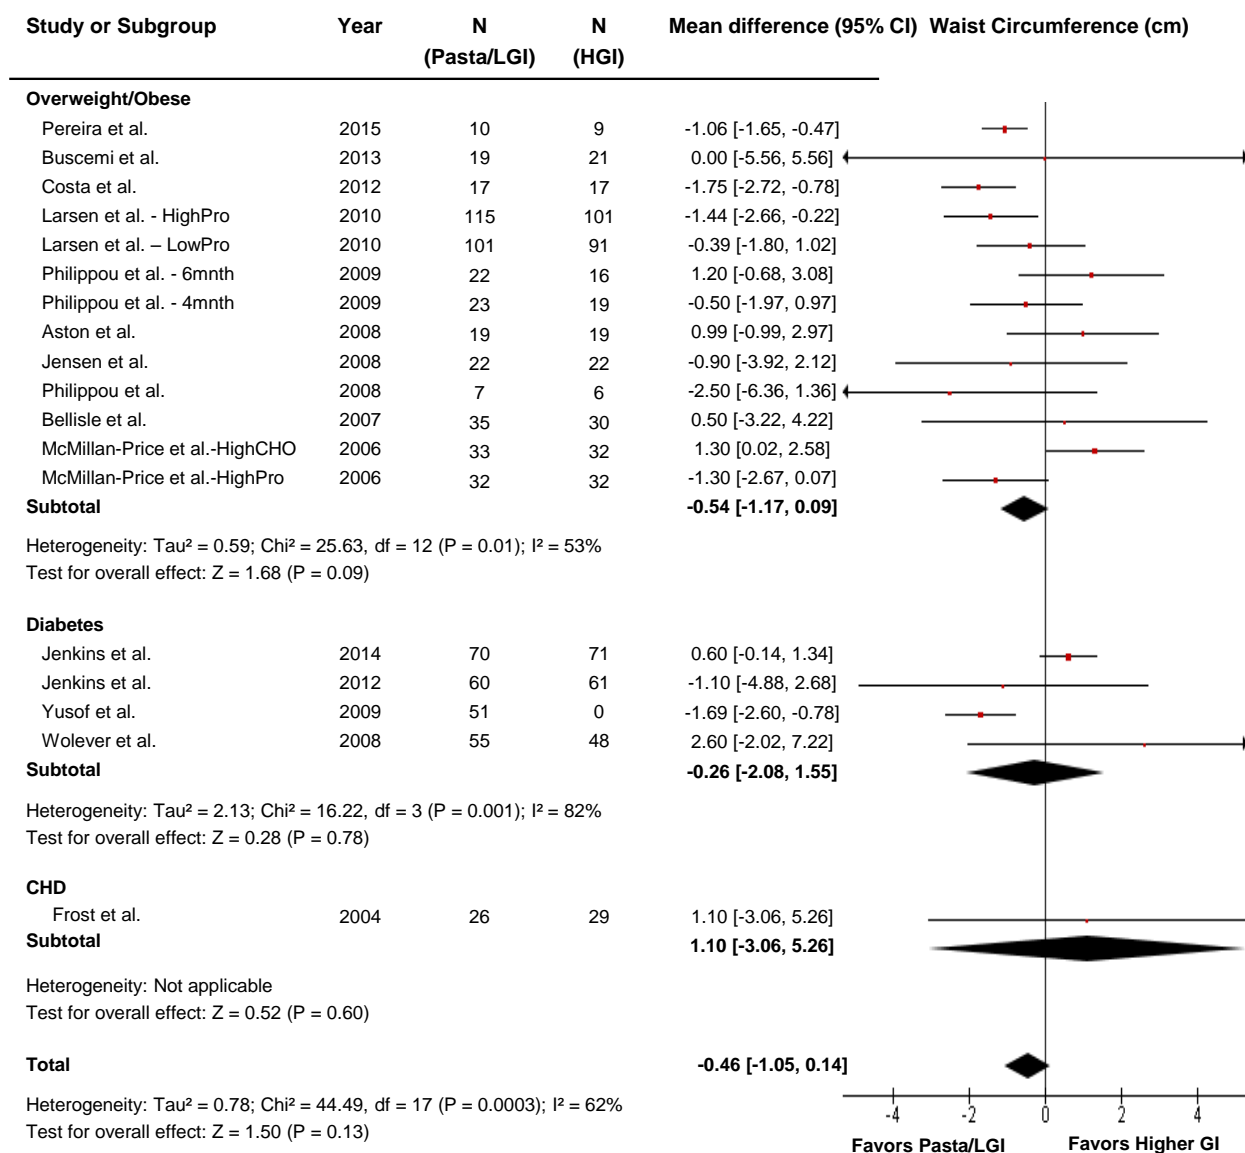

Data are expressed as mean differences represented by a square and 95% CIs by the line through the square. 95% CIs exceeding the plot's bounds are represented by an arrowhead. Pooled effect estimates are represented by diamonds and were estimated with the use of generic inverse variance random effects models. Between-study heterogeneity was assessed by the Cochran Q statistic, where  $P < 0.10$  is considered statistically significant, and quantified by the  $I^2$  statistic, where  $I^2 \geq 50\%$  is considered evidence of substantial heterogeneity. CHD, coronary heart disease; CHO, carbohydrate; CI, confidence interval; HGI, higher glycemic index diet; GI, glycemic index; LGI, low glycemic index diet; Pro, protein

**Supplemental Figure S6: Forest plot of randomized controlled trials of the effect of pasta in the context of low-GI dietary patterns on waist-to-hip ratio (n = 445).**

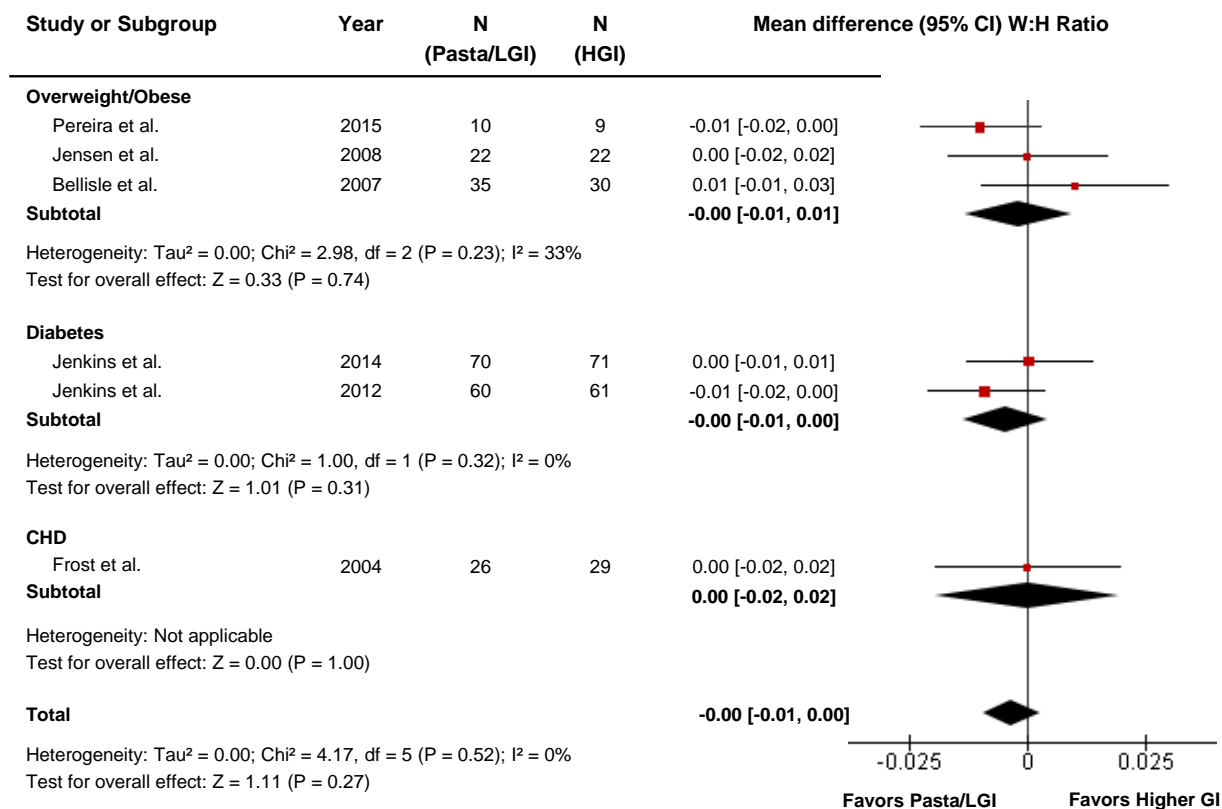

Data are expressed as mean differences represented by a square and 95% CIs by the line through the square. 95% CIs exceeding the plot's bounds are represented by an arrowhead. Pooled effect estimates are represented by diamonds and were estimated with the use of generic inverse variance random effects models. Between-study heterogeneity was assessed by the Cochran Q statistic, where  $P < 0.10$  is considered statistically significant, and quantified by the  $I^2$  statistic, where  $I^2 \geq 50\%$  is considered evidence of substantial heterogeneity. CHD, coronary heart disease; CI, confidence interval; HGI, higher glycemic index diet; GI, glycemic index; LGI, low glycemic index diet

**Supplemental Figure S7: Forest plot of randomized controlled trials of the effect of pasta in the context of low-GI dietary patterns on sagittal abdominal diameter (cm) (n = 478).**

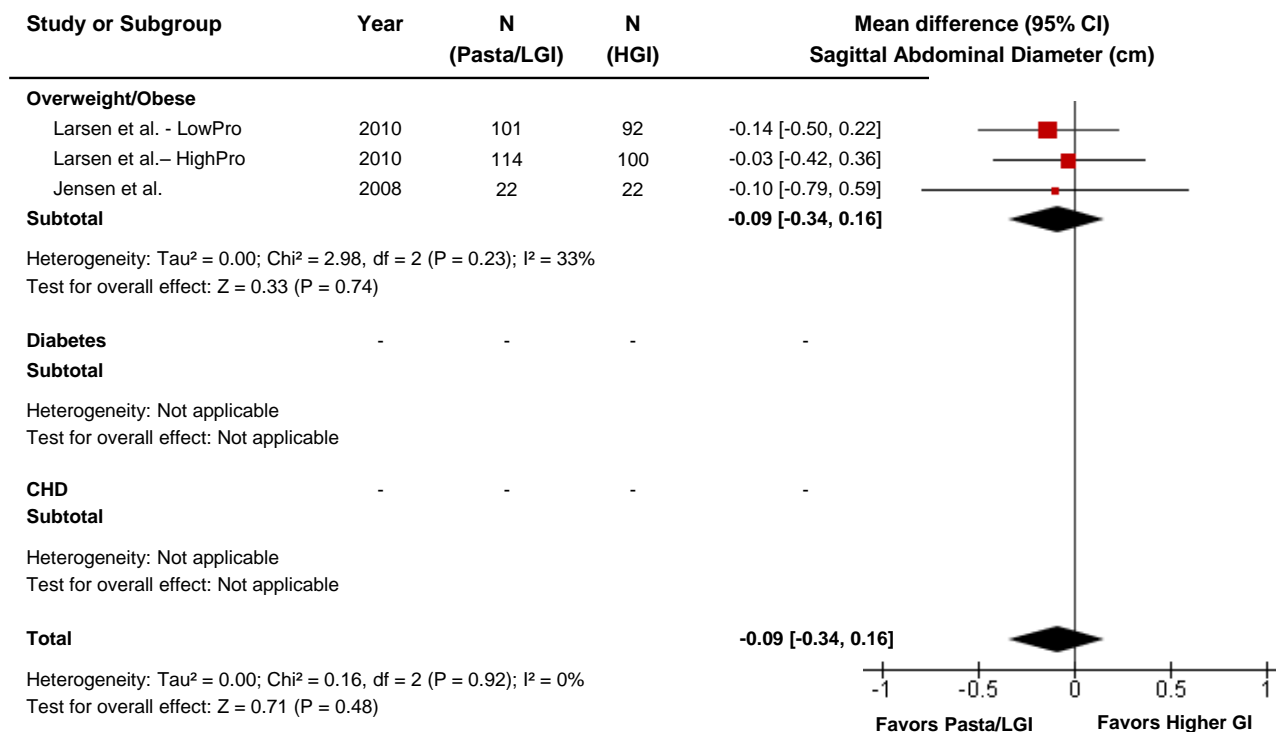

Data are expressed as mean differences represented by a square and 95% CIs by the line through the square. 95% CIs exceeding the plot's bounds are represented by an arrowhead. Pooled effect estimates are represented by diamonds and were estimated with the use of generic inverse variance random effects models. Between-study heterogeneity was assessed by the Cochran Q statistic, where  $P < 0.10$  is considered statistically significant and quantified by the  $I^2$  statistic, where  $I^2 \geq 50\%$  is considered evidence of substantial heterogeneity. CHD, coronary heart disease; CI, confidence interval; HGI, higher glycemic index diet; GI, glycemic index; LGI, low glycemic index diet; Pro, protein

**Supplemental Figure S8: Forest plot of randomized controlled trials of the effect of pasta in the context of low-GI dietary patterns on body weight (kg) using fixed effects models (n = 2448).**

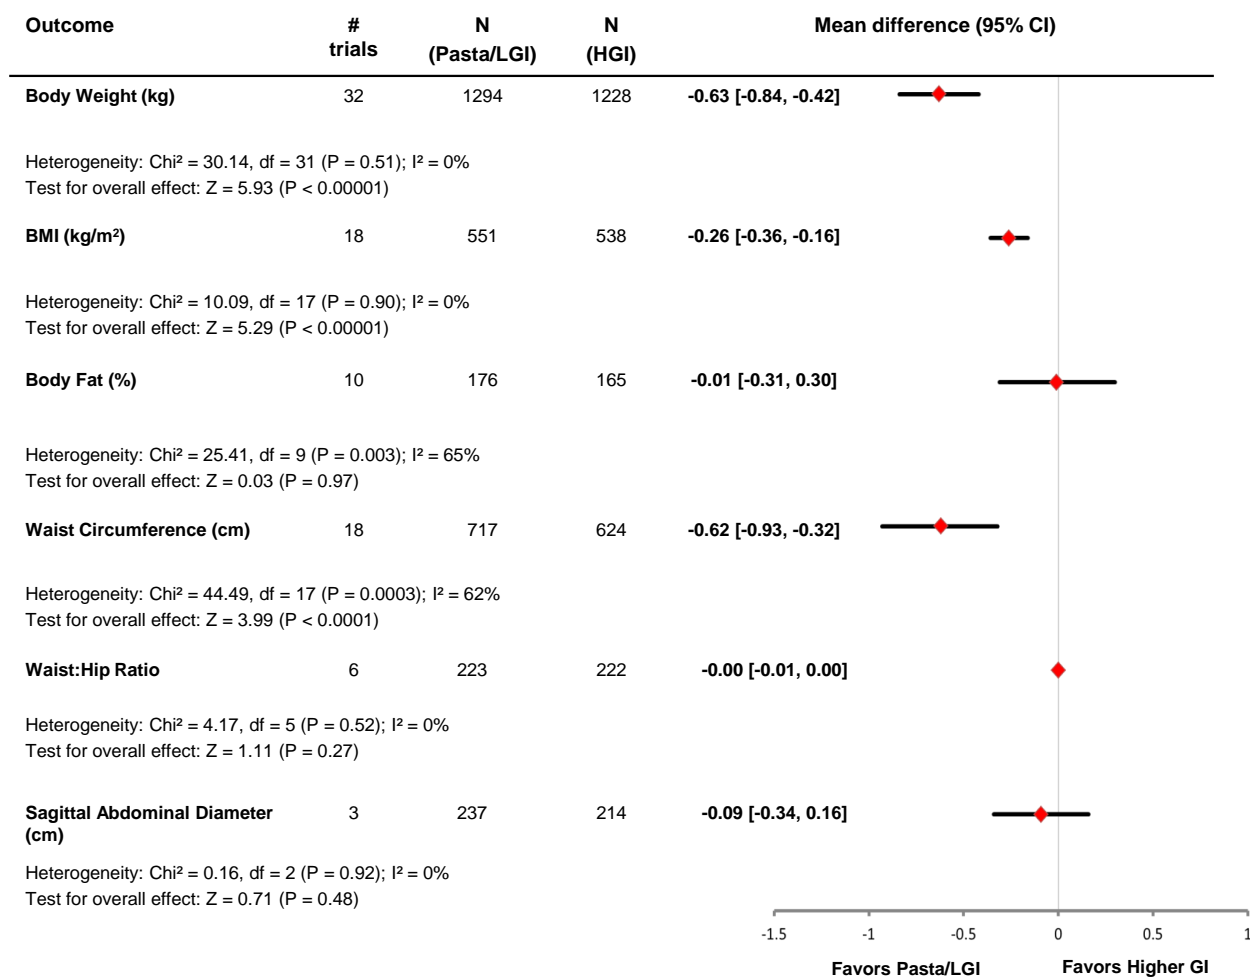

Data are expressed as mean differences represented by a square and 95% CIs by the line through the square. 95% CIs exceeding the plot's bounds are represented by an arrowhead. Pooled effect estimates are represented by diamonds and were estimated with the use of generic inverse variance fixed effects models. Between-study heterogeneity was assessed by the Cochran Q statistic, where  $P < 0.10$  is considered statistically significant and quantified by the  $I^2$  statistic, where  $I^2 \geq 50\%$  is considered evidence of substantial heterogeneity. CHD, coronary heart disease; CHO, carbohydrate; CI, confidence interval; HGI, higher glycemic index diet; GI, glycemic index; LGI, low glycemic index diet; MUFA, monounsaturated fatty acids; Pro, protein.

**Supplemental Figure S9: Forest plot of the randomized controlled trials of the effect of pasta in the context of low-GI dietary patterns on body weight (kg) which contain data for the approximation of pasta intake (n = 740).**

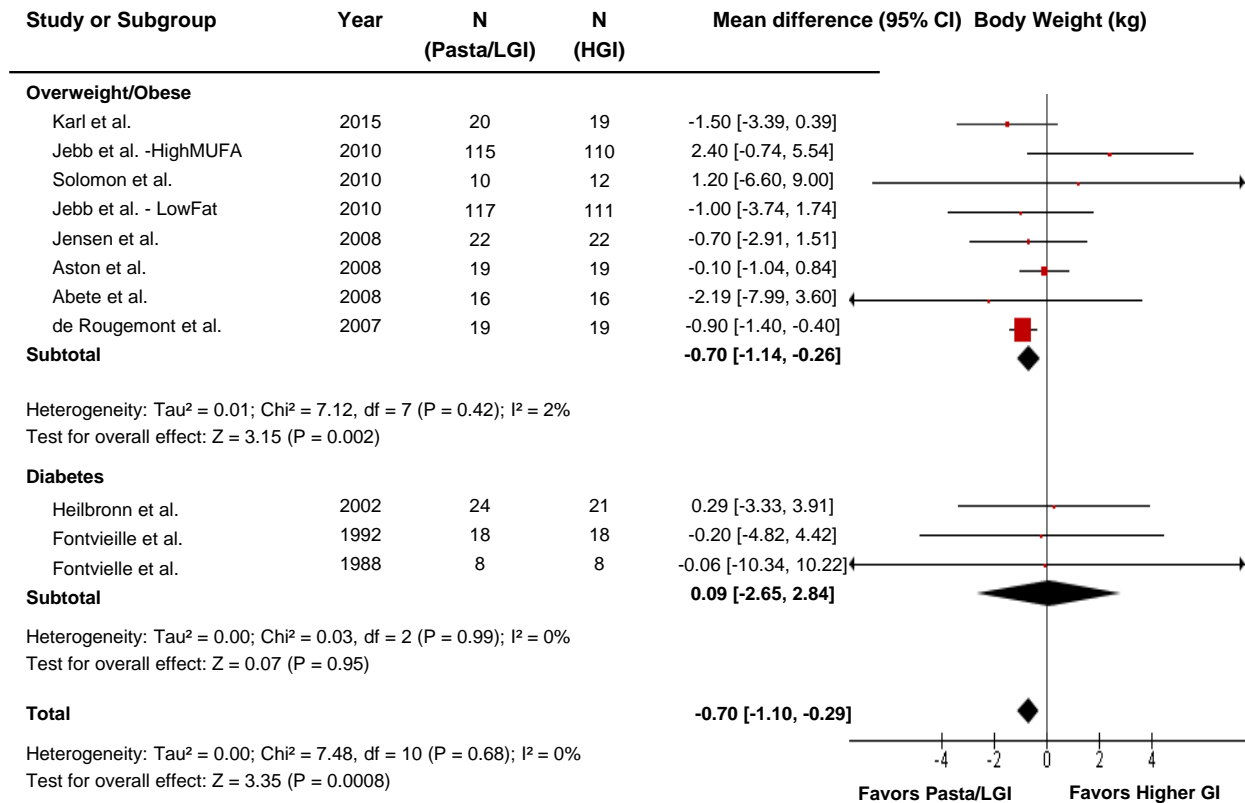

Data are expressed as mean differences represented by a square and 95% CIs by the line through the square. 95% CIs exceeding the plot's bounds are represented by an arrowhead. Pooled effect estimates are represented by diamonds and were estimated with the use of generic inverse variance random effects models. Between-study heterogeneity was assessed by the Cochran Q statistic, where  $P < 0.10$  is considered statistically significant and quantified by the  $I^2$  statistic, where  $I^2 \geq 50\%$  is considered evidence of substantial heterogeneity. CI, confidence interval; HGI, higher glycemic index diet; GI, glycemic index; LGI, low glycemic index diet; MUFA, monounsaturated fatty acids

**Supplemental Figure S10: A priori subgroup analyses for the effect of pasta in the context of low-GI dietary patterns on body weight (kg) (n = 2448).**

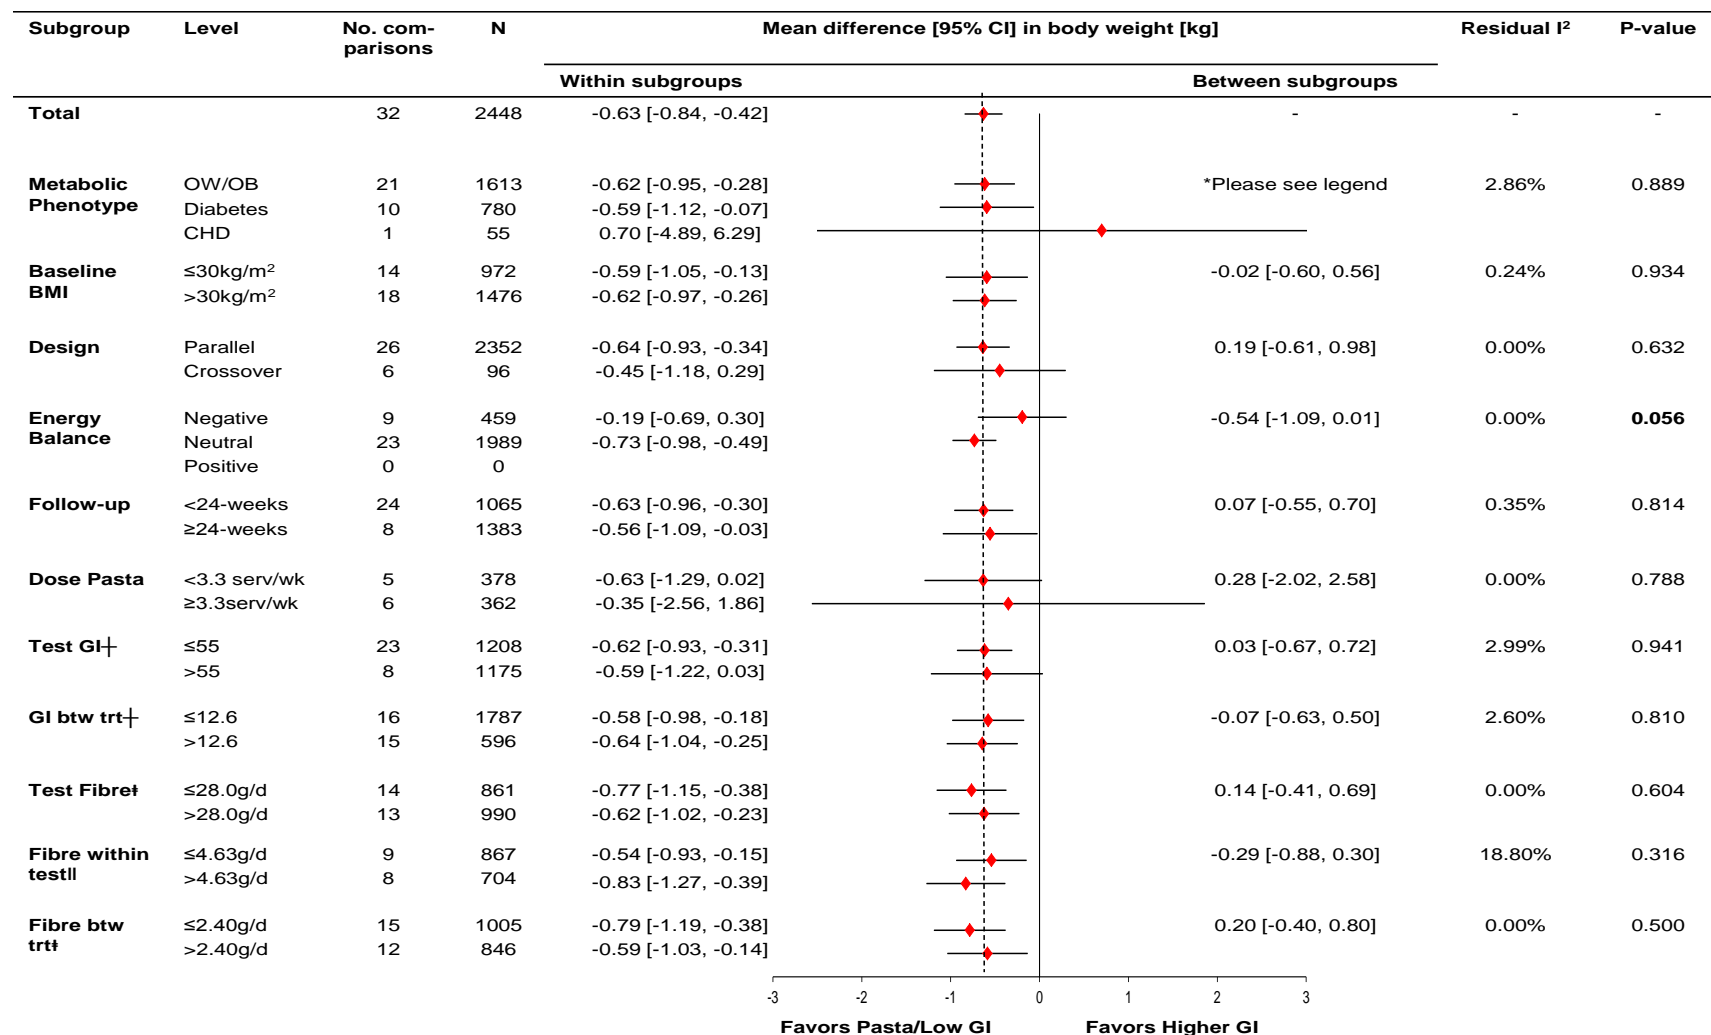

The dashed line represents the pooled estimate for the overall primary analysis of pasta in the context of low-GI dietary patterns on body weight. Within subgroup mean differences are the pooled effect estimates represented by a diamond. 95% CIs are represented by

the line through the square. The residual  $I^2$  was estimated by the Cochran Q statistic and indicates the between study heterogeneity unexplained by the variability in response because of the specific between studies factor.  $P < 0.05$  indicates that the effect size differed between levels of the subgroup. Within and between-treatment changes were categorically assessed based on the median intakes. BMI, body mass index; btw, between; CHD, coronary heart disease; CI, confidence interval; GI, glycemic index (glucose scale); OB, obese; OW, overweight; serv, serving; trt, treatment; wk, week.

\*Pairwise between-subgroup mean differences (95% CIs) for Metabolic Phenotype were as follows: 0.02kg (-0.08, 0.65) (1 vs. 2) to 1.32kg (-4.28, 6.91) (1 vs. 3) to -1.29kg (-6.91, 4.32) (2 vs. 3).

† data available on 31 studies

‖ data available on 17 studies

‡ data available on 27 studies



**Supplemental Figure S11: A priori subgroup analyses for the effect of pasta in the context of low-GI dietary patterns on body weight (kg) continued (n = 2448).**

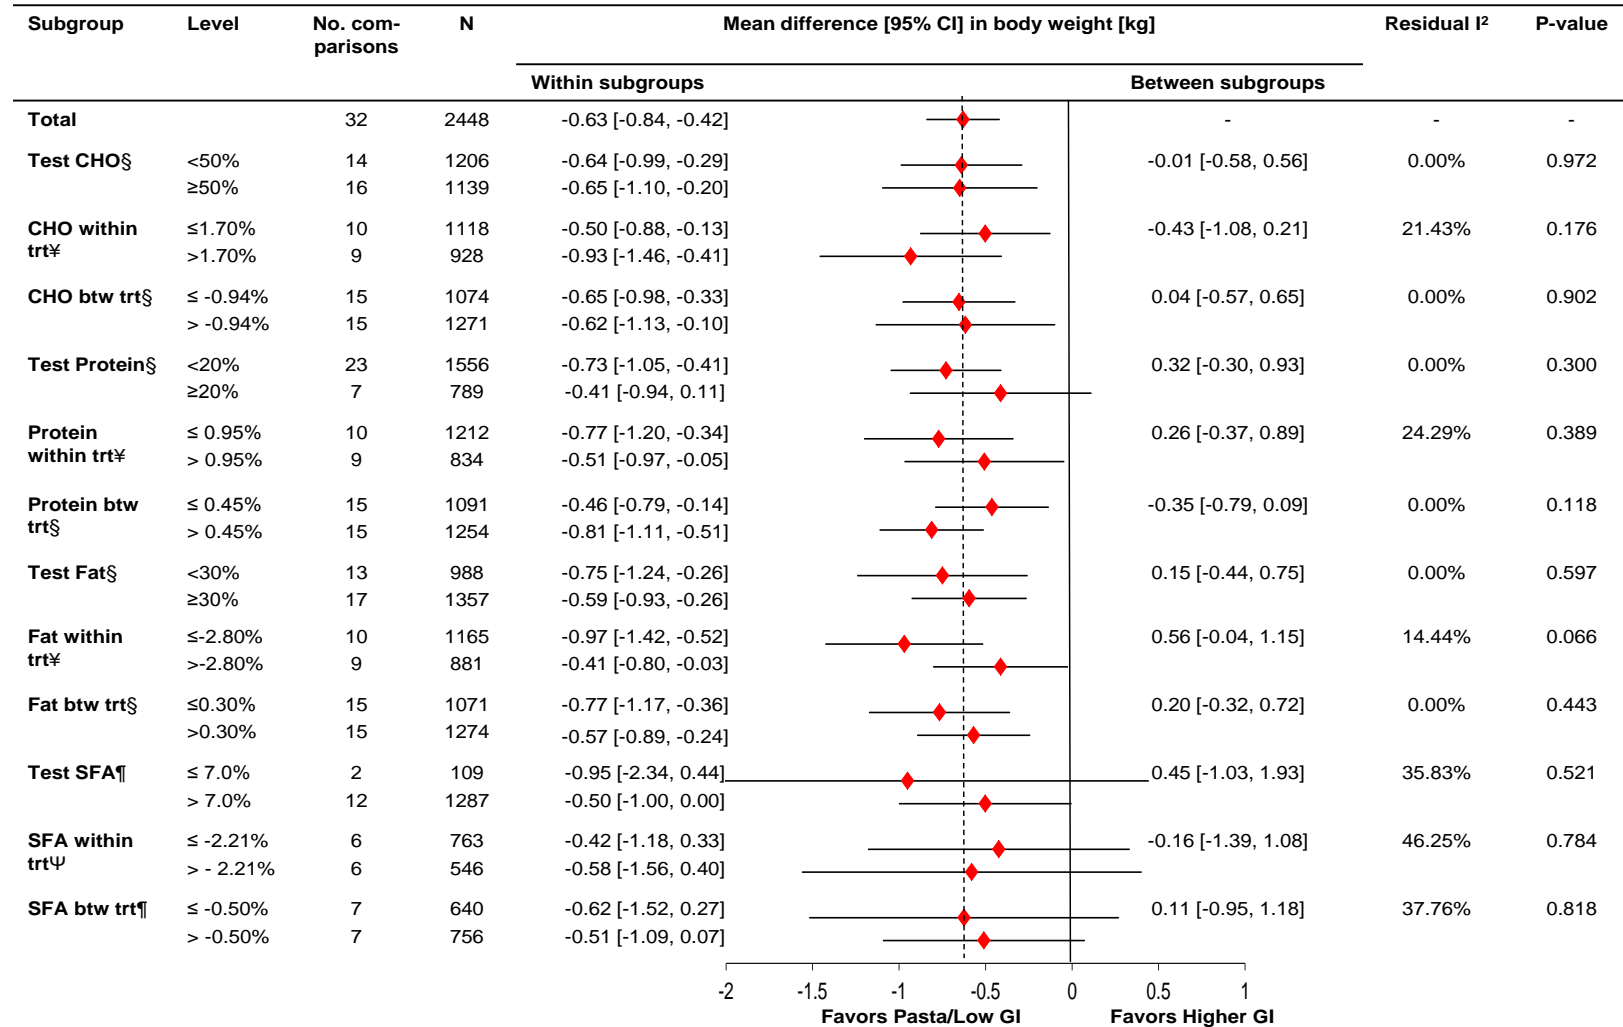

The dashed line represents the pooled estimate for the overall primary analysis of pasta in the context of low-GI dietary patterns on

body weight. Within subgroup mean differences are the pooled effect estimates represented by a diamond. 95% CIs are represented by the line through the square. The residual  $I^2$  was estimated by the Cochran Q statistic and indicates the between study heterogeneity unexplained by the variability in response because of the specific between studies factor.  $P < 0.05$  indicates that the effect size differed between levels of the subgroup. Within and between-treatment changes were categorically assessed based on the median intakes. BMI, body mass index; btw, between; CI, confidence interval; GI, glycemic index (glucose scale); trt, treatment.

§ data available on 30 studies

¥ data available on 19 studies

¶ data available on 14 studies

Ψ data available on 12 studies

**Supplemental Figure S12: A priori subgroup analyses on risk of bias for the effect of pasta in the context of low-GI dietary patterns on body weight (kg) (n = 2448).**

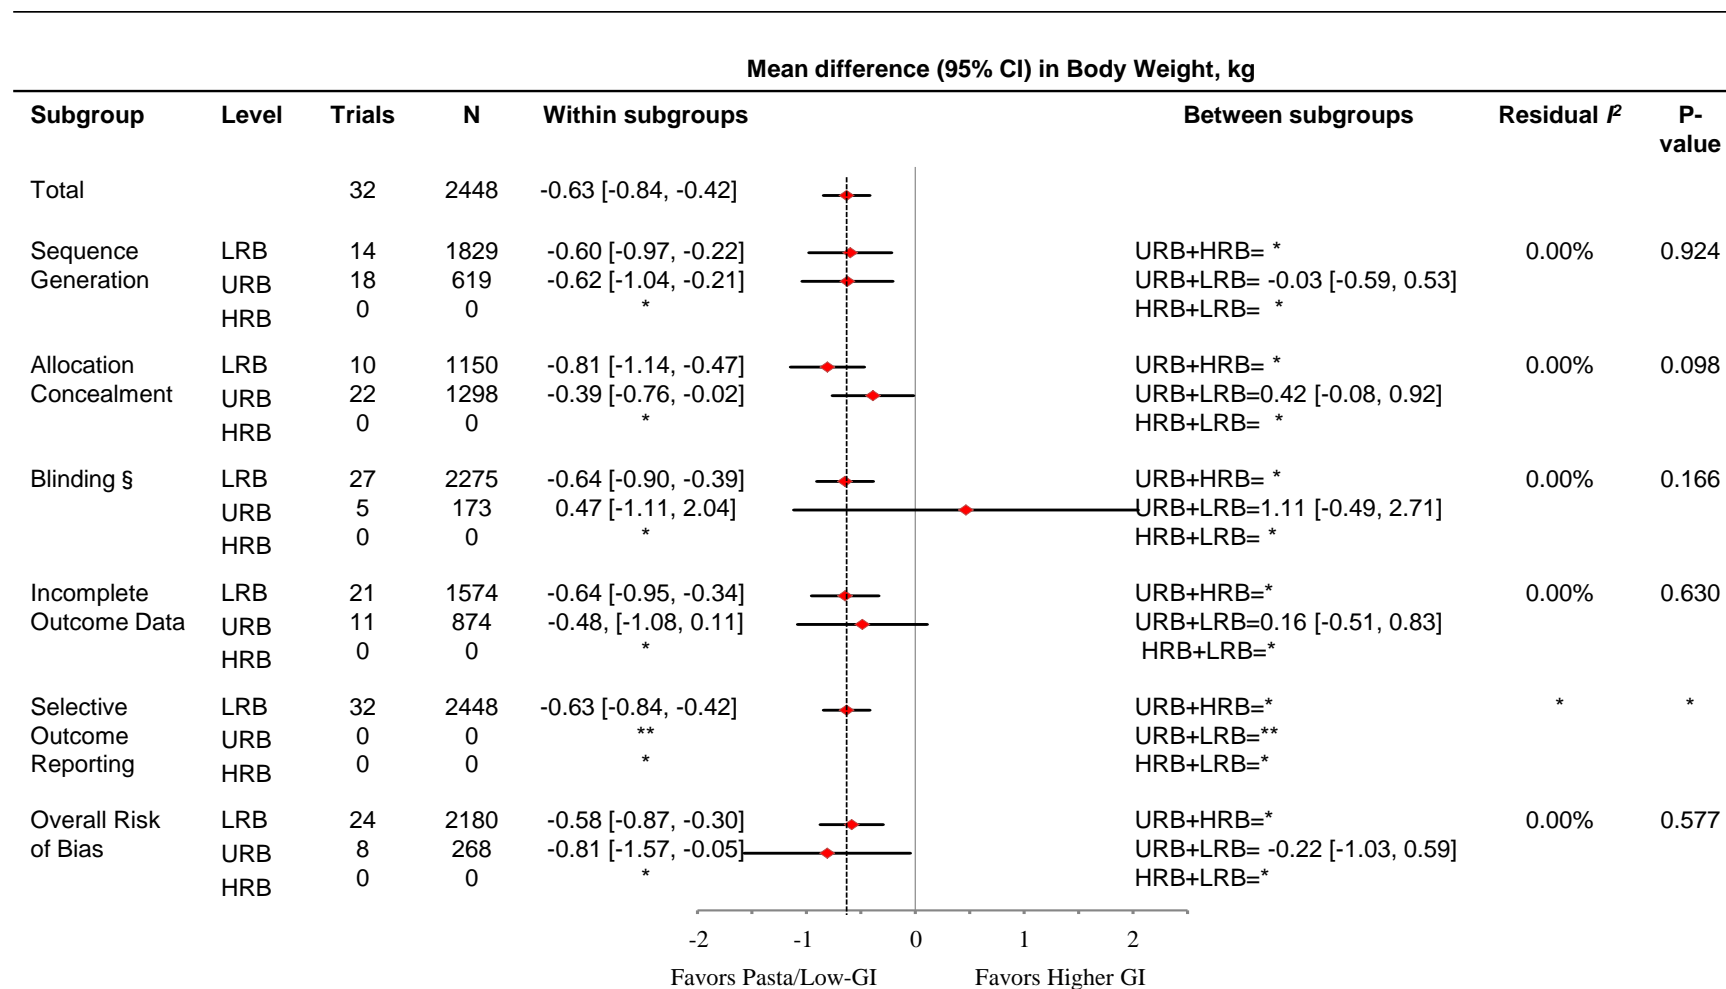

The dashed line represents the pooled estimate for the overall primary analysis of pasta in the context of low-GI dietary patterns on body weight. Within subgroup mean differences are the pooled effect estimates represented by a diamond. 95% CIs are represented by the line through the square. The residual  $I^2$  was estimated by the Cochran Q statistic and indicates the between study heterogeneity

unexplained by the variability in response because of the specific between studies factor.  $P < 0.05$  indicates that the effect size differed between levels of the subgroup. LRB=Low Risk of Bias, URB= Unclear Risk of Bias, HRB=High Risk of Bias. \*Within and between subgroup analysis could not be performed against HRB since no values for HRB subgroup. \*\* no values for URB subgroup. §Blinding of Participants, Personnel, and Outcome Assessors.

**Supplemental Figure S13: A priori subgroup analyses for the effect of pasta in the context of low-GI dietary patterns on body mass index, BMI (kg/m<sup>2</sup>) (n = 1038).**

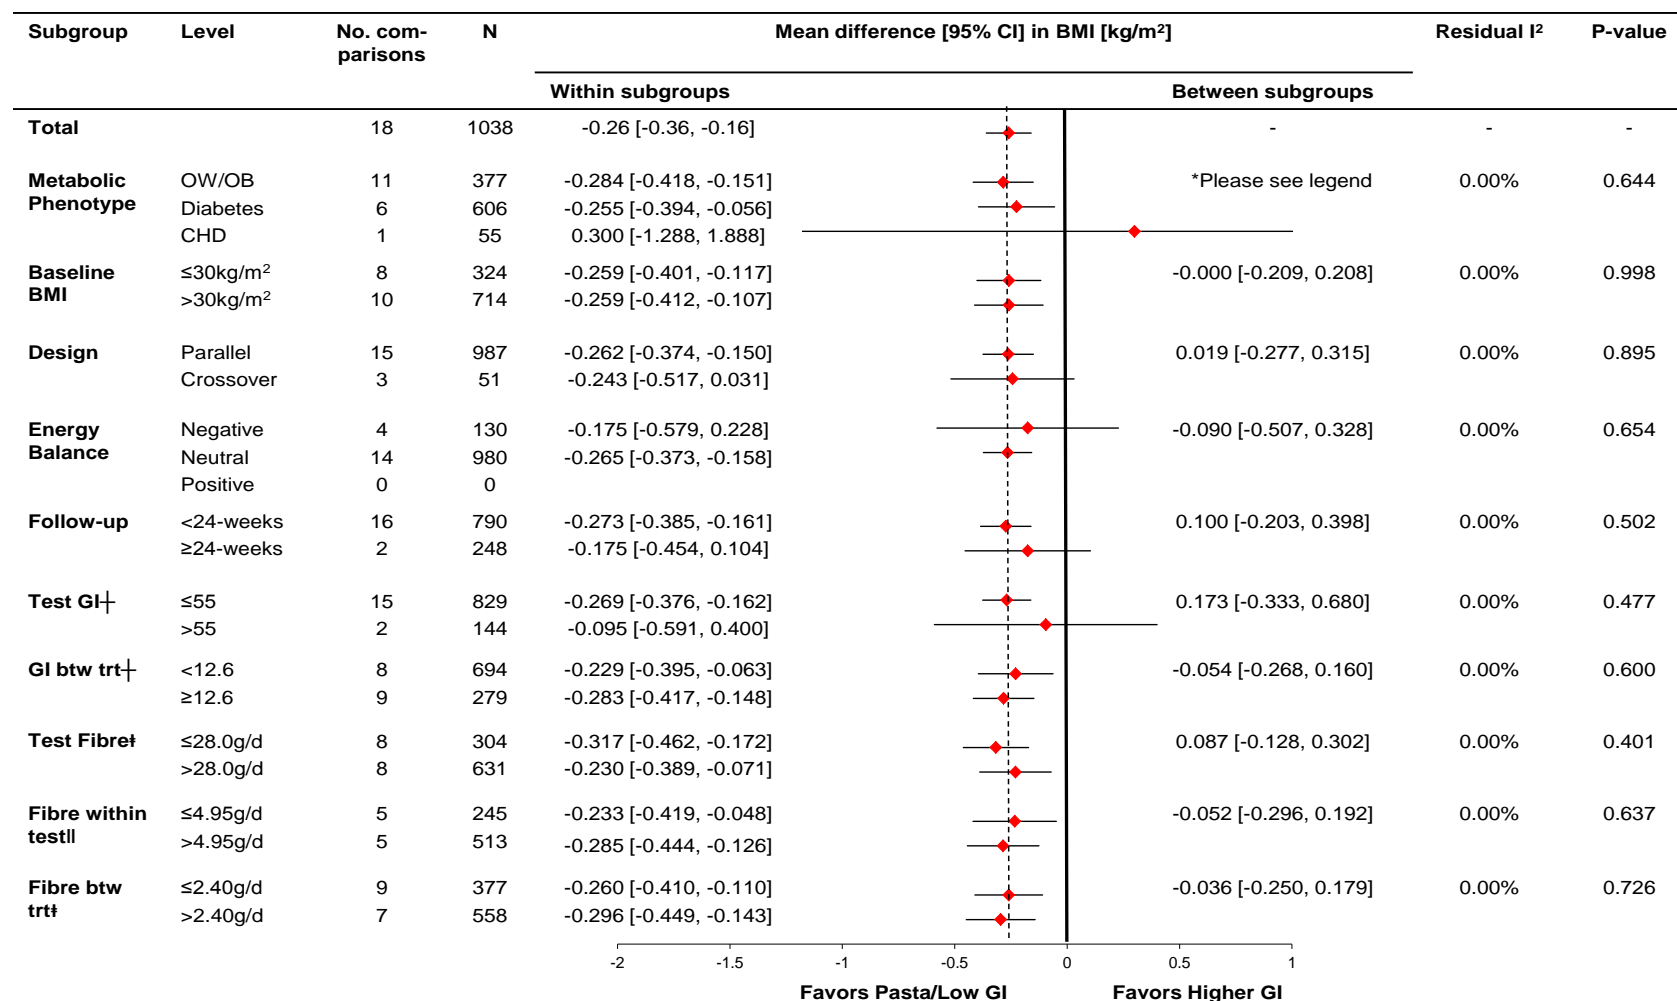

The dashed line represents the pooled estimate for the overall primary analysis of pasta in the context of low-GI dietary patterns on BMI. Within subgroup mean differences are the pooled effect estimates represented by a diamond. 95% CIs are represented by the line

through the square. The residual  $I^2$  was estimated by the Cochran Q statistic and indicates the between study heterogeneity unexplained by the variability in response because of the specific between studies factor.  $P < 0.05$  indicates that the effect size differed between levels of the subgroup. Within and between-treatment changes were categorically assessed based on the median intakes. There were less than 10 trials available for categorical subgroup assessment for dose (n=3 trials), therefore analyses were not performed. BMI, body mass index; btw, between; CI, confidence interval; GI, glycemic index (glucose scale); OB, obese; OW, overweight; trt, treatment.

\*Pairwise between-subgroup mean differences (95% CIs) for Metabolic Phenotype were as follows:  $0.059\text{kg/m}^2$  (-0.156, 0.274) (1 vs. 2) to  $0.584\text{kg/m}^2$  (-1.009, 2.178) (1 vs. 3) to  $-0.525\text{kg/m}^2$  (-2.122, 1.072) (2 vs. 3).

† data available on 17 studies

‡ data available on 16 studies

|| data available on 10 studies

**Supplemental Figure S14: A priori subgroup analyses for the effect of pasta in the context of low-GI dietary patterns on body mass index, BMI (kg/m<sup>2</sup>) continued (n = 1038).**

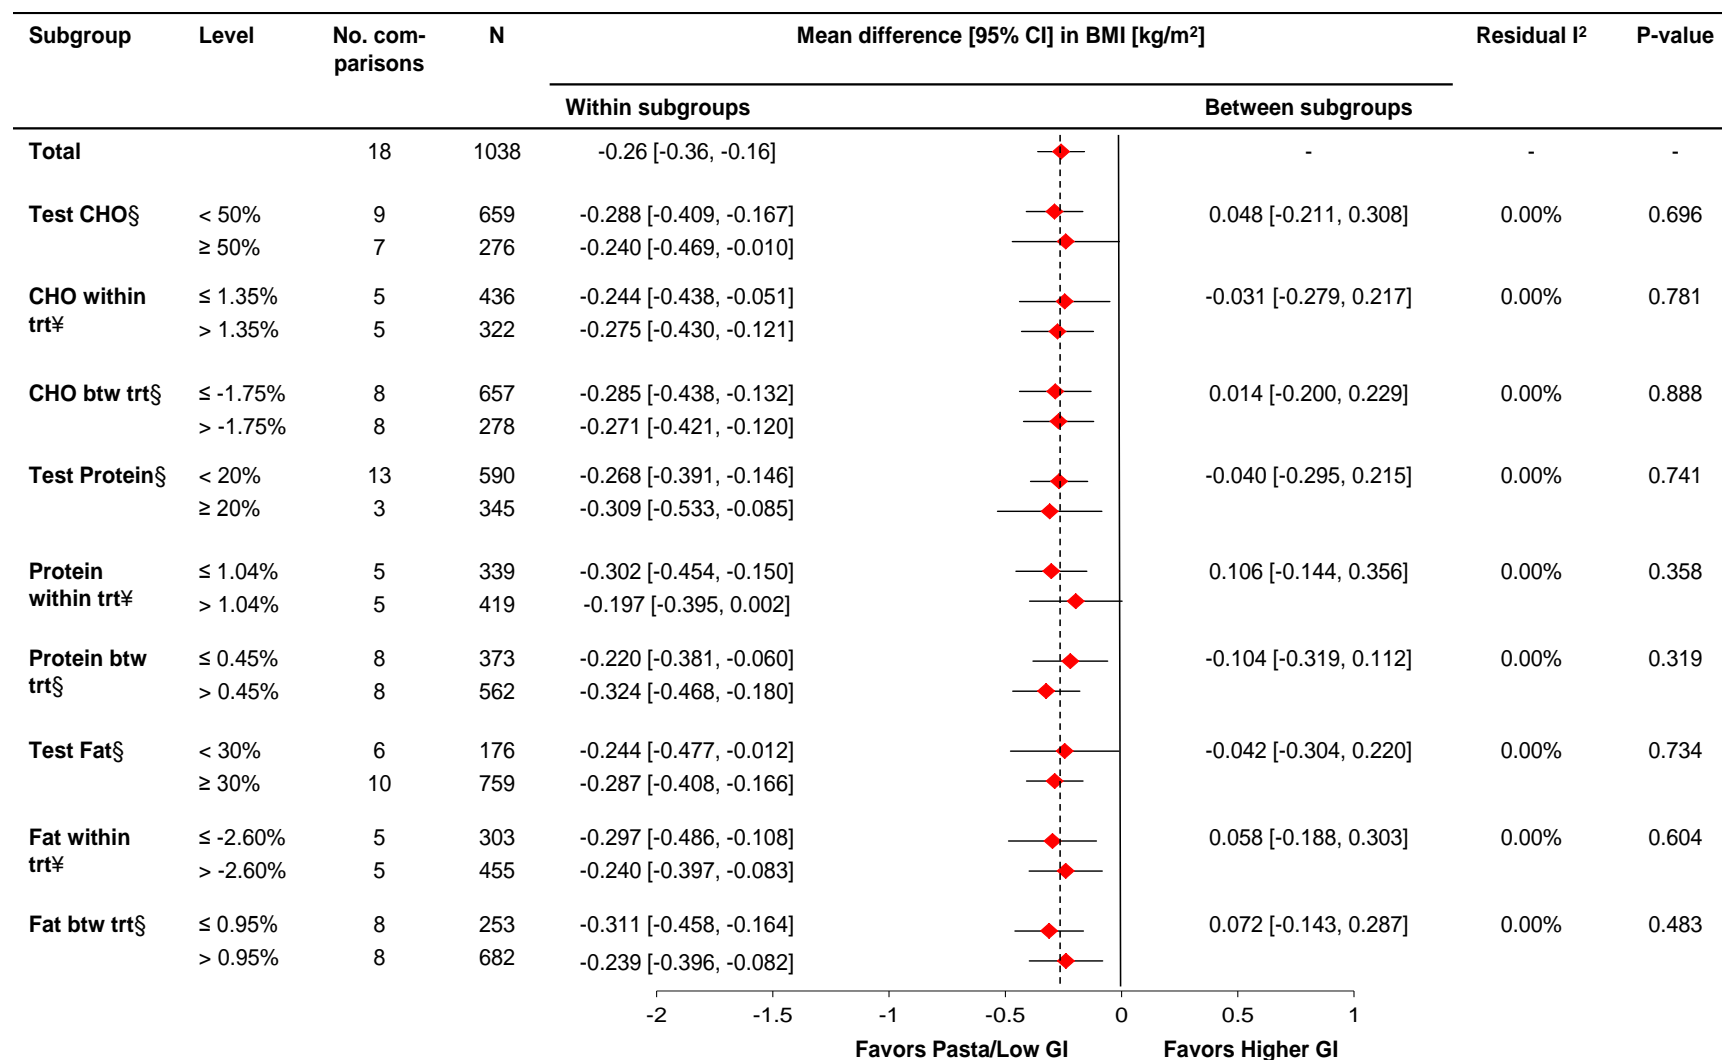

The dashed line represents the pooled estimate for the overall primary analysis of pasta in the context of low-GI dietary patterns on

BMI. Within subgroup mean differences are the pooled effect estimates represented by a diamond. 95% CIs are represented by the line through the square. The residual  $I^2$  was estimated by the Cochran Q statistic and indicates the between study heterogeneity unexplained by the variability in response because of the specific between studies factor.  $P < 0.05$  indicates that the effect size differed between levels of the subgroup. Within and between-treatment changes were categorically assessed based on the median intakes. There were less than 10 trials available for categorical subgroup assessment for test saturated fat (n=7 trials), saturated fat within treatment (n=6 trials) and saturated fat between treatments (n=7 trials), therefore analyses were not performed. BMI, body mass index; btw, between; CHO, carbohydrate; CI = confidence interval; GI, glycemic index (glucose scale); trt, treatment.

§ data available on 16 studies

¥ data available on 10 studies



**Supplemental Figure S15: A priori subgroup analyses on risk of bias for the effect of pasta in the context of low-GI dietary patterns on body mass index, BMI (kg/m<sup>2</sup>) (n = 1038).**

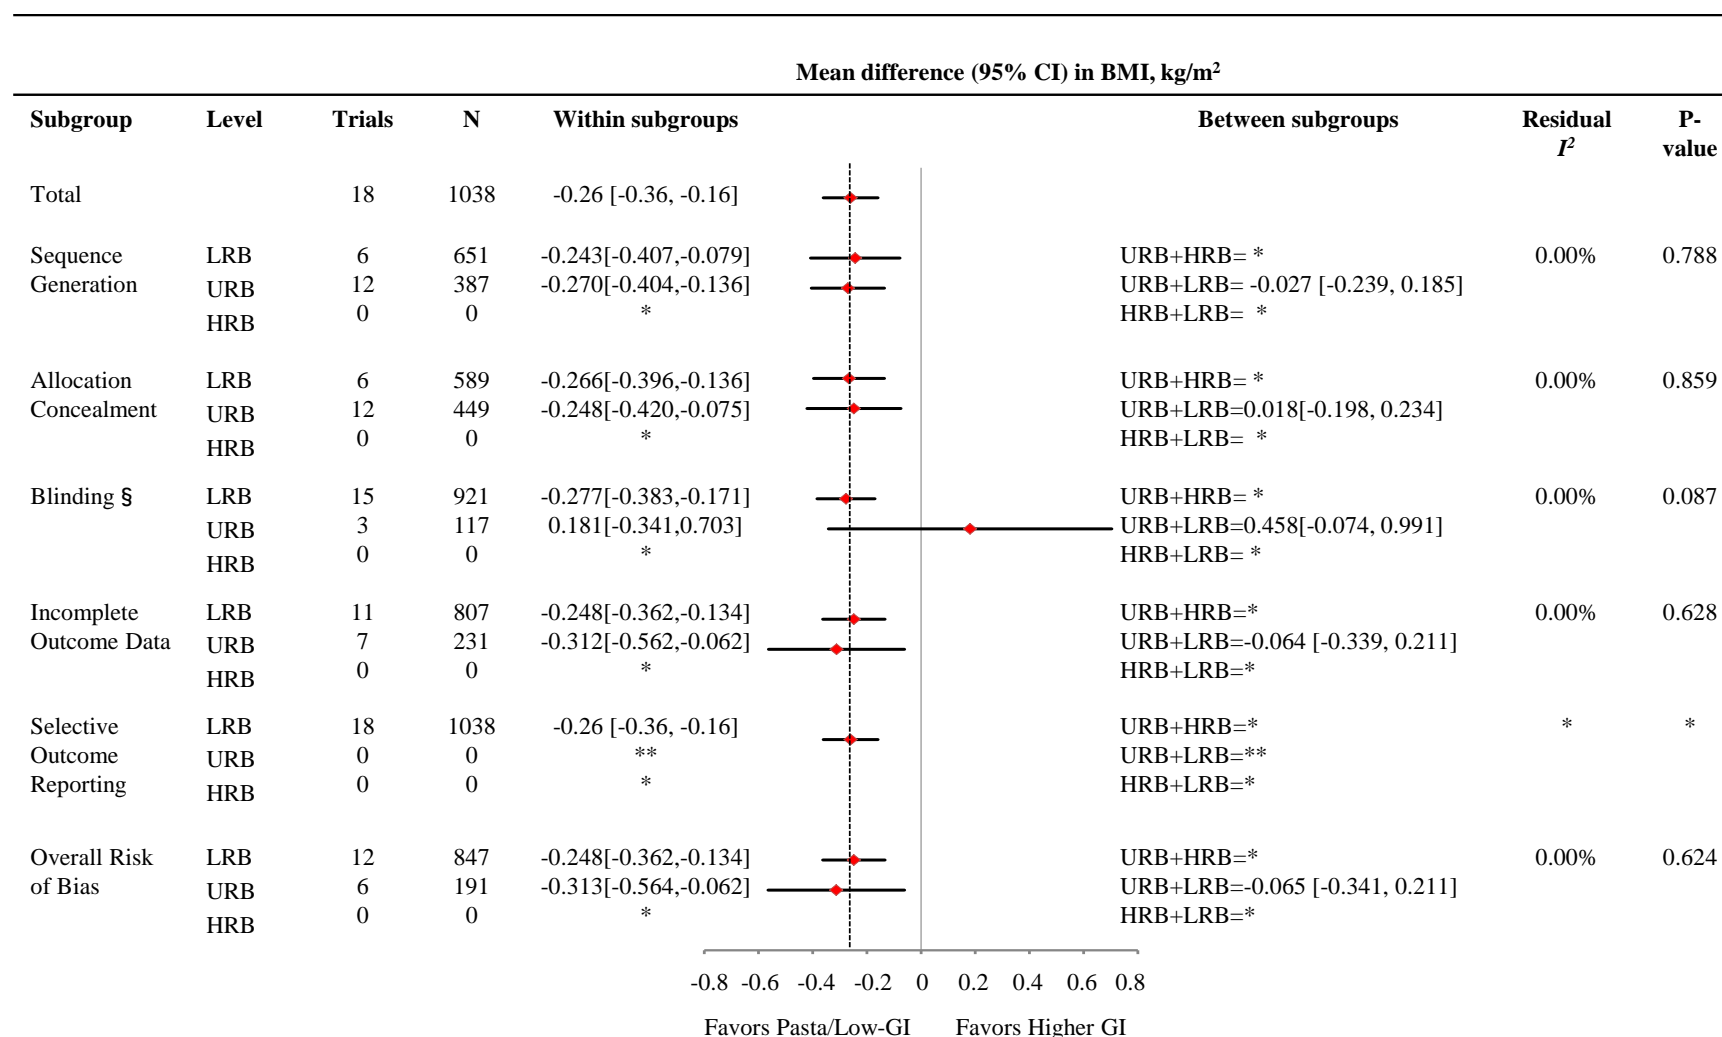

The dashed line represents the pooled estimate for the overall primary analysis of pasta in the context of low-GI dietary patterns on BMI. Within subgroup mean differences are the pooled effect estimates represented by a diamond. 95% CIs are represented by the line

through the square. The residual  $I^2$  was estimated by the Cochran Q statistic and indicates the between study heterogeneity unexplained by the variability in response because of the specific between studies factor.  $P < 0.05$  indicates that the effect size differed between levels of the subgroup. BMI, body mass index; CI, confidence interval; HRB, High Risk of Bias; GI, glycemic index; LRB, Low Risk of Bias; URB, Unclear Risk of Bias.

\*Within and between subgroup analyses could not be performed against HRB since no values for HRB subgroup.

\*\* no values for URB subgroup.

§Blinding of Participants, Personnel, and Outcome Assessors.

**Supplemental Figure S16: A priori subgroup analyses for the effect of pasta in the context of low-GI dietary patterns on body fat (%) (n = 285).**

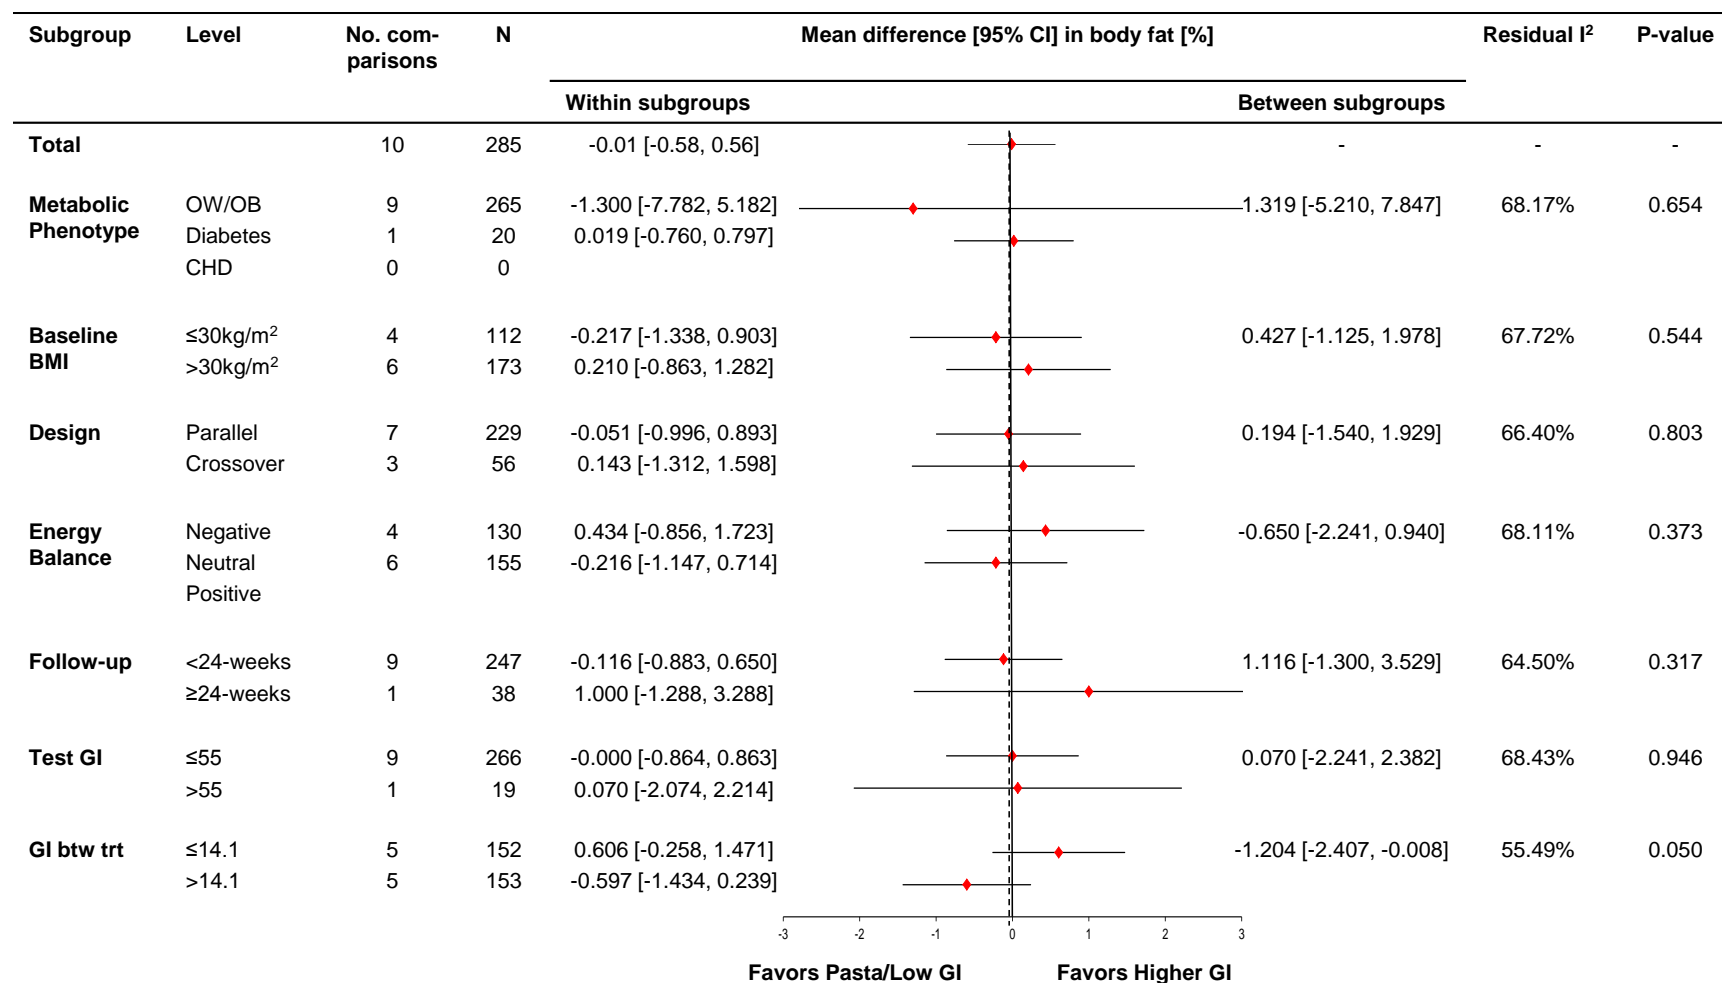

The dashed line represents the pooled estimate for the overall primary analysis of pasta in the context of low-GI dietary patterns on body fat. Within subgroup mean differences are the pooled effect estimates represented by a diamond. 95% CIs are represented by the

line through the square. The residual  $I^2$  was estimated by the Cochran Q statistic and indicates the between study heterogeneity unexplained by the variability in response because of the specific between studies factor.  $P < 0.05$  indicates that the effect size differed between levels of the subgroup. Within and between-treatment changes were categorically assessed based on the median intakes. There were less than 10 trials available for categorical subgroup assessment for dose (n=3), test carbohydrate, protein and fat (n=9), carbohydrate, protein and fat within treatment (n=4), carbohydrate, protein and fat between treatment (n=9), test fibre (n=8), fibre within treatment (n=4), fibre between treatment (n=8), test saturated fat (n=3 trials), saturated fat within treatment (n=2 trials) and saturated fat between treatments (n=3 trials), therefore analyses were not performed. BMI, body mass index; btw, between; CHO, carbohydrate; CI = confidence interval; GI, glycemic index (glucose scale); OB, obese; OW, overweight; trt, treatment.

**Supplemental Figure S17: A priori subgroup analyses on risk of bias for the effect of pasta in the context of low-GI dietary patterns on body fat (%) (n = 285).**

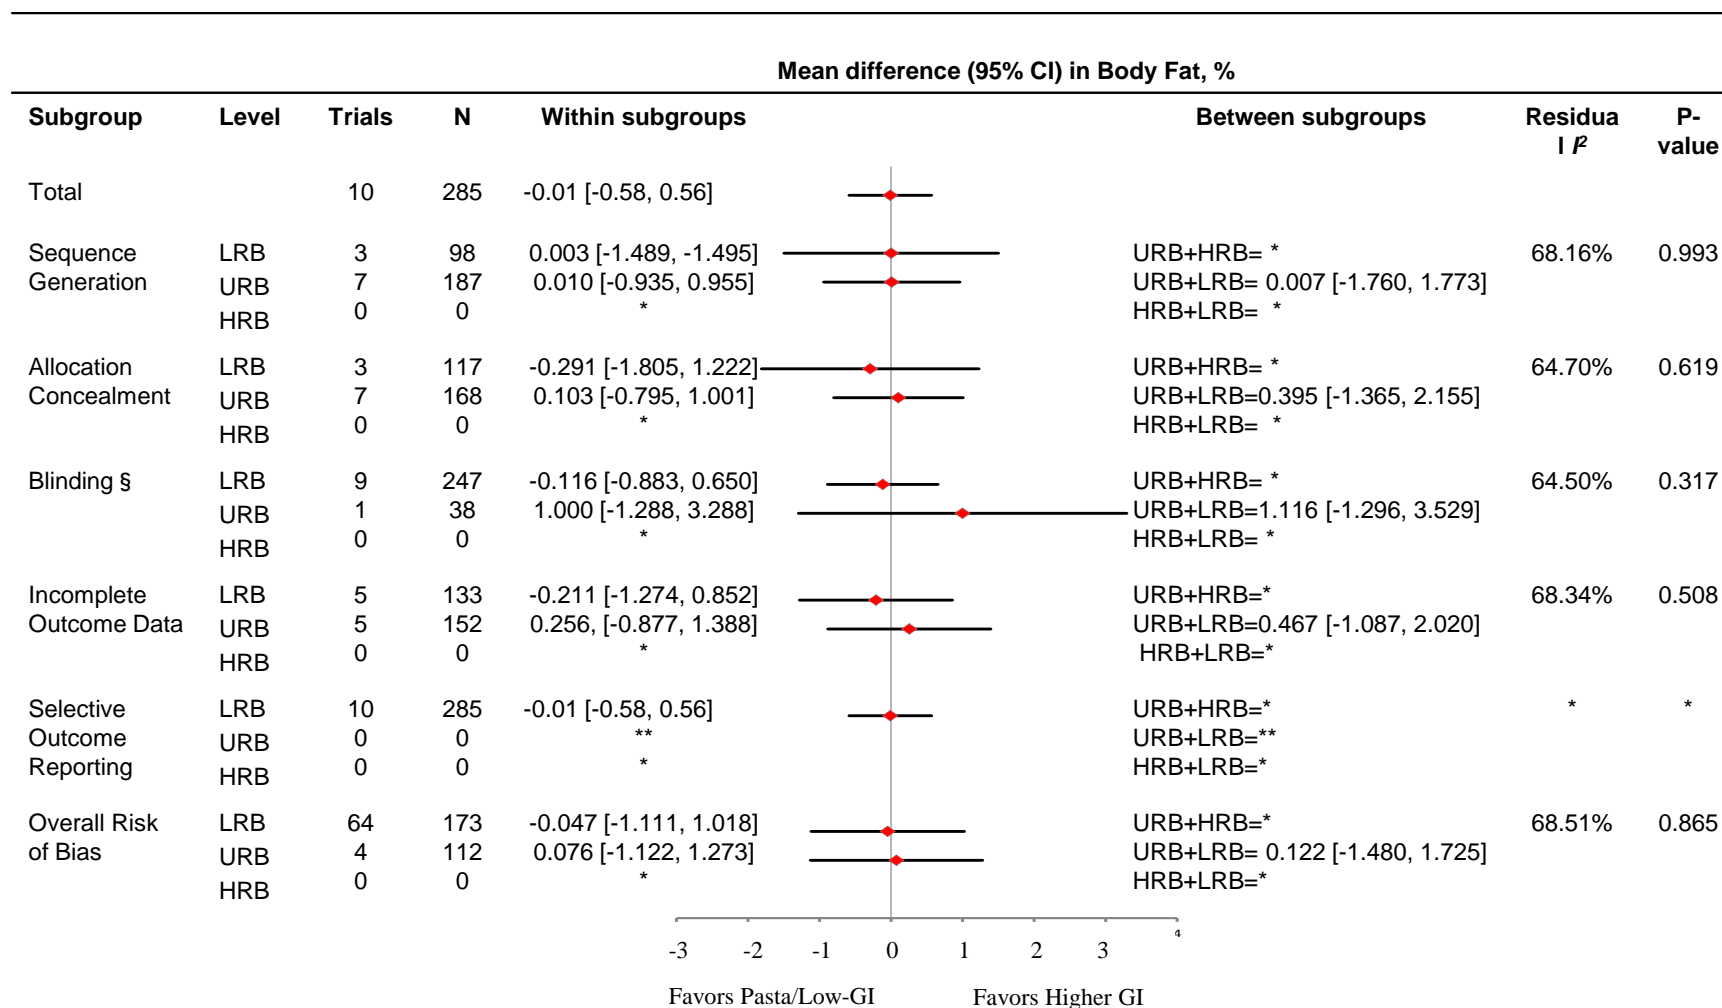

The dashed line represents the pooled estimate for the overall primary analysis of pasta in the context of low-GI dietary patterns on body fat. Within subgroup mean differences are the pooled effect estimates represented by a diamond. 95% CIs are represented by the

line through the square. The residual  $I^2$  was estimated by the Cochran Q statistic and indicates the between study heterogeneity unexplained by the variability in response because of the specific between studies factor.  $P < 0.05$  indicates that the effect size differed between levels of the subgroup. CI, confidence interval; HRB, High Risk of Bias; GI, glycemic index; LRB, Low Risk of Bias; URB, Unclear Risk of Bias

\*Within and between subgroup analyses could not be performed against HRB since no values for HRB subgroup.

\*\* no values for URB subgroup.

§ Blinding of Participants, Personnel, and Outcome Assessors.

**Supplemental Figure S18: A priori subgroup analyses for the effect of pasta in the context of low-GI dietary patterns on waist circumference (cm) (n = 1380).**

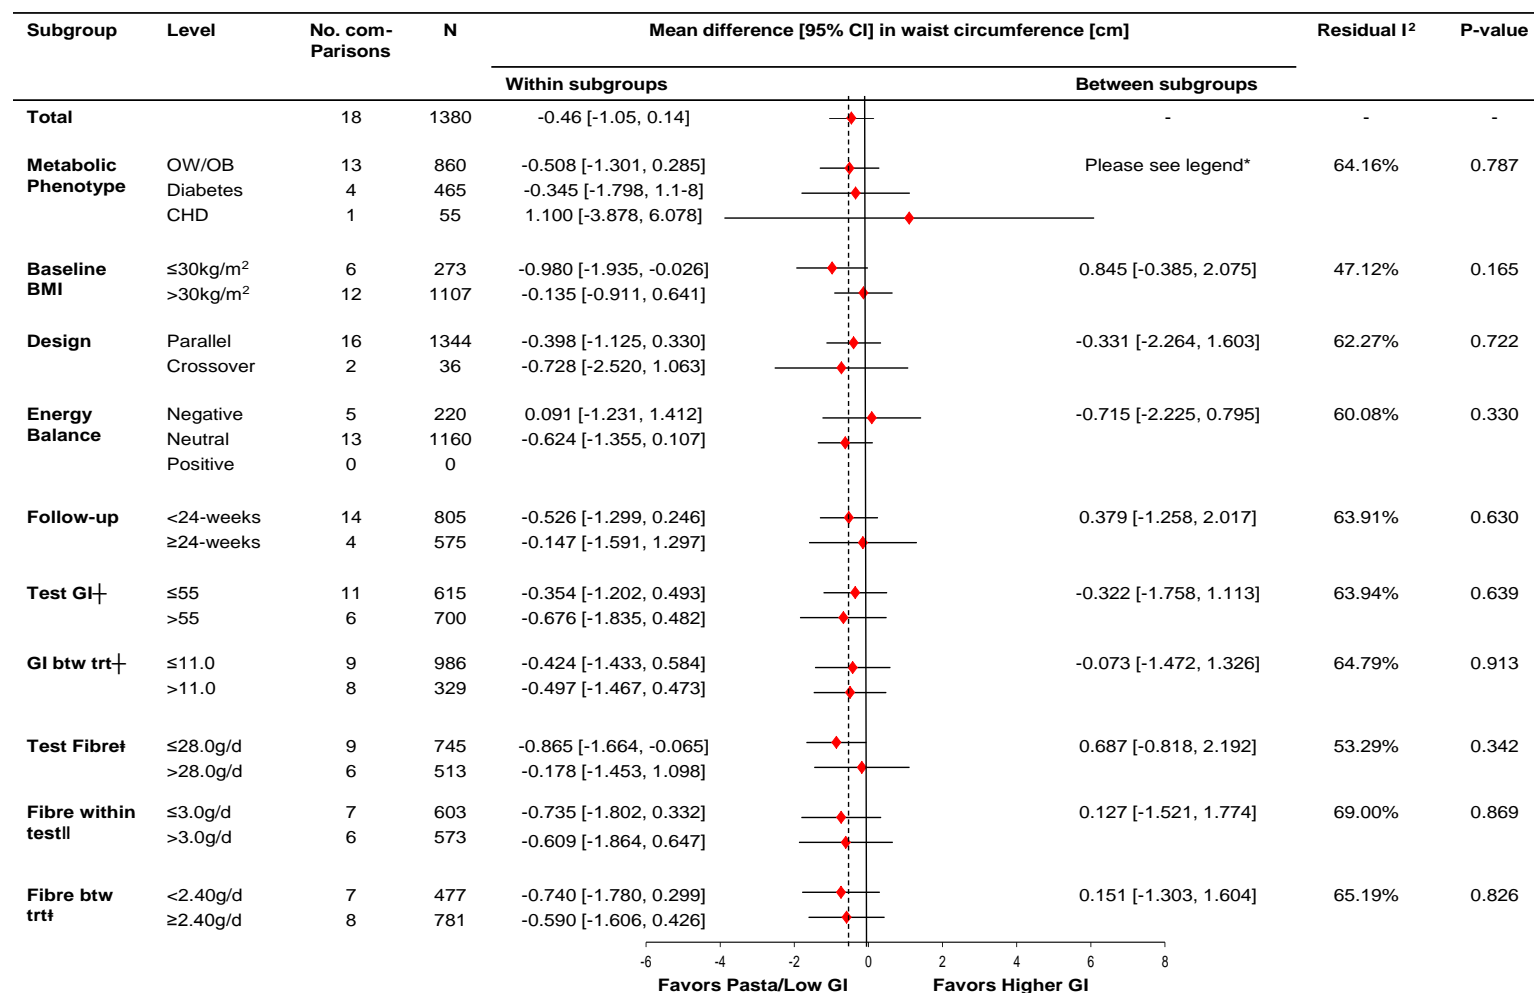

The dashed line represents the pooled estimate for the overall primary analysis of pasta in the context of low-GI dietary patterns on waist circumference. Within subgroup mean differences are the pooled effect estimates represented by a diamond. 95% CIs are

represented by the line through the square. The residual  $I^2$  was estimated by the Cochran Q statistic and indicates the between study heterogeneity unexplained by the variability in response because of the specific between studies factor.  $P < 0.05$  indicates that the effect size differed between levels of the subgroup. Within and between-treatment changes were categorically assessed based on the median intakes. There were less than 10 trials available for categorical subgroup assessment for dose (n=2 trials), therefore analyses were not performed. BMI, body mass index; btw, between; CI = confidence interval; GI, glycemic index (glucose scale); OB, obese; OW, overweight; trt, treatment.

\*Pairwise between-subgroup mean differences (95% CIs) for Metabolic Phenotype were as follows: 0.163cm (-1.492, 1.818) (1 vs. 2) to 1.608cm (-3.432, 6.648) (1 vs. 3) to -1.445cm (-6.630, 3.740) (2 vs. 3).

† data available on 17 studies

‡ data available on 15 studies



**Supplemental Figure S19: A priori subgroup analyses for the effect of pasta in the context of low-GI dietary patterns on waist circumference (cm) continued (n = 1380).**

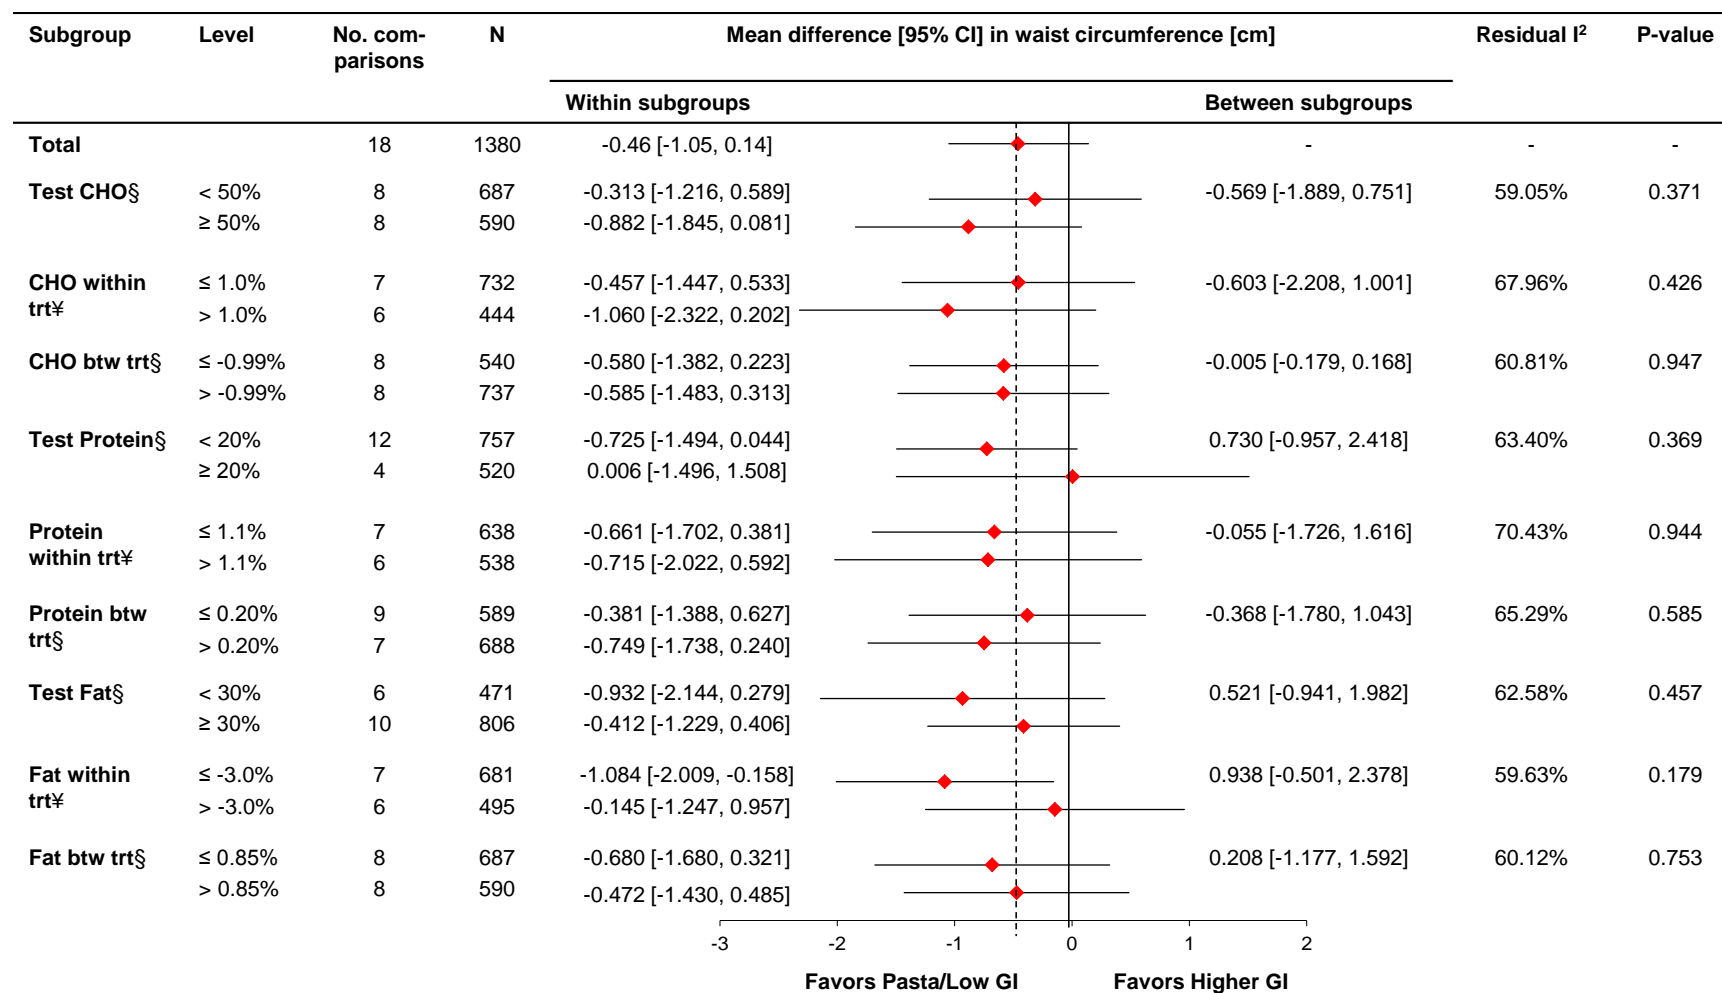

The dashed line represents the pooled estimate for the overall primary analysis of pasta in the context of low-GI dietary patterns on waist circumference. Within subgroup mean differences are the pooled effect estimates represented by a diamond. 95% CIs are

represented by the line through the square. The residual  $I^2$  was estimated by the Cochran Q statistic and indicates the between study heterogeneity unexplained by the variability in response because of the specific between studies factor.  $P < 0.05$  indicates that the effect size differed between levels of the subgroup. Within and between-treatment changes were categorically assessed based on the median intakes. There were less than 10 trials available for categorical subgroup assessment for test saturated fat (n=8 trials), saturated fat within treatment (n=7 trials) and saturated fat between treatments (n=8 trials), therefore analyses were not performed. BMI, body mass index; btw, between; CHO, carbohydrate; CI = confidence interval; GI, glycemic index (glucose scale); trt, treatment.

§ data available on 16 studies

¥ data available on 13 studies

**Supplemental Figure S20: A priori subgroup analyses on risk of bias for the effect of pasta in the context of low-GI dietary patterns on waist circumference (cm) (n = 1380).**

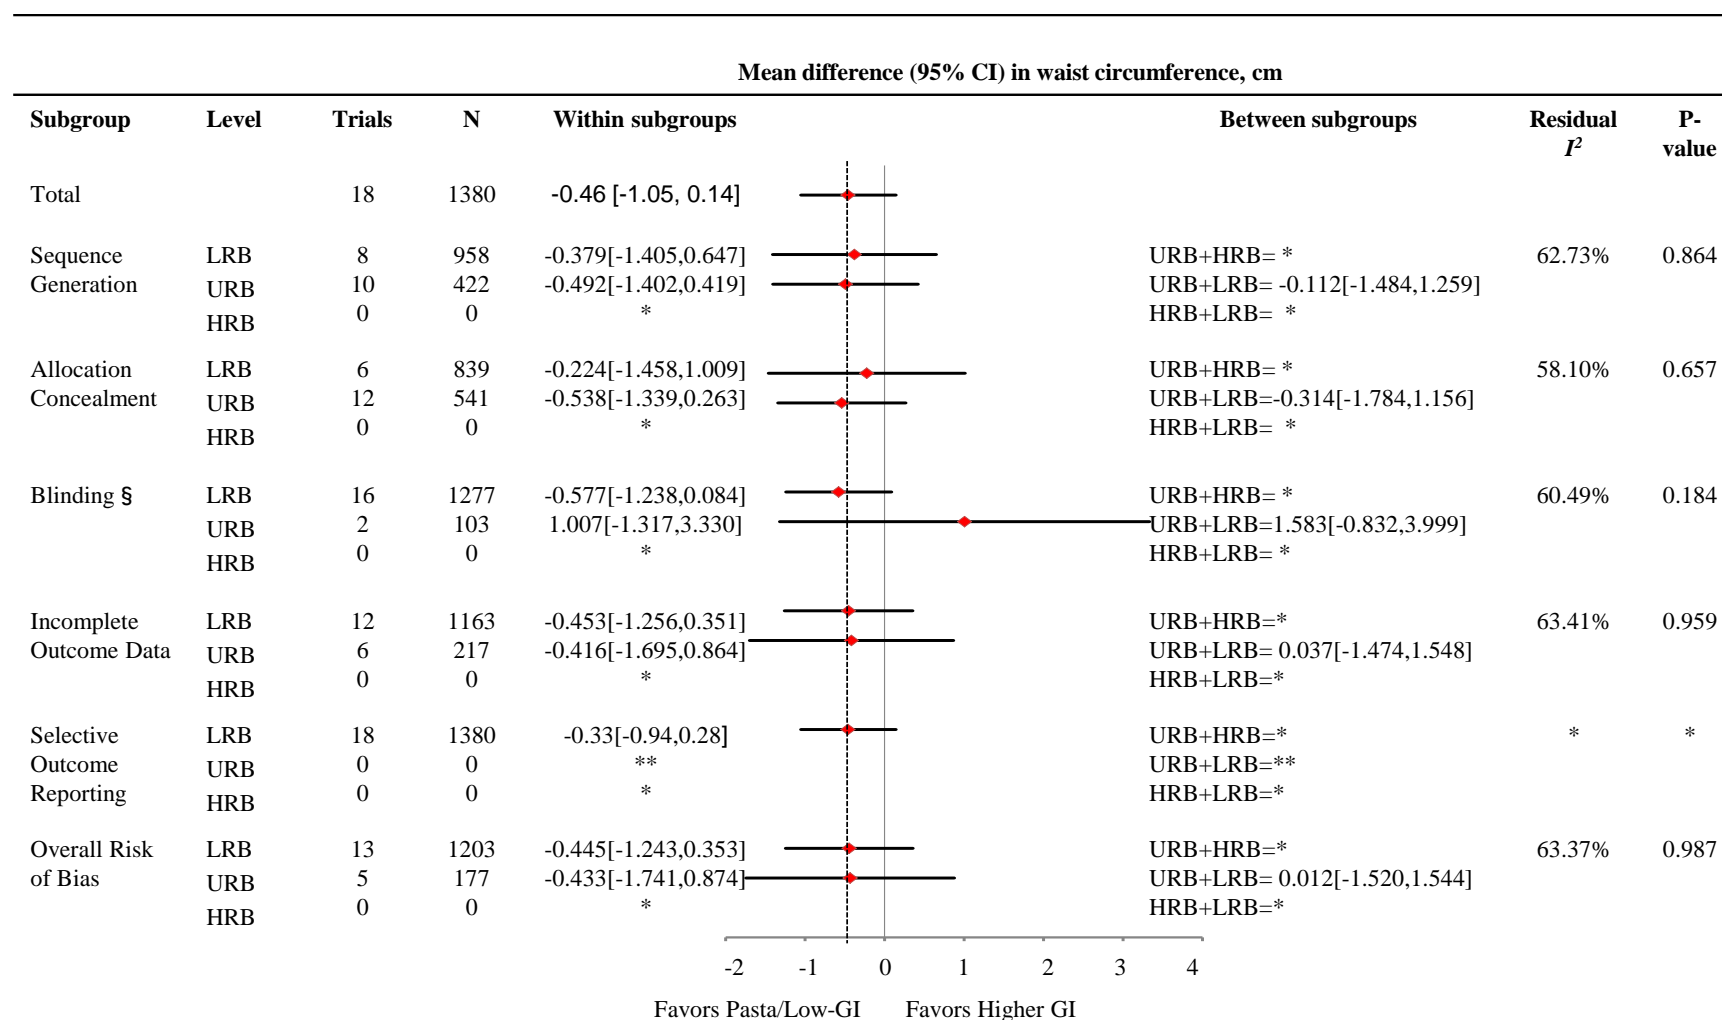

The dashed line represents the pooled estimate for the overall primary analysis of pasta in the context of low-GI dietary patterns on waist circumference. Within subgroup mean differences are the pooled effect estimates represented by a diamond. 95% CIs are

represented by the line through the square. The residual  $I^2$  was estimated by the Cochran Q statistic and indicates the between study heterogeneity unexplained by the variability in response because of the specific between studies factor.  $P < 0.05$  indicates that the effect size differed between levels of the subgroup. CI, confidence interval; HRB, High Risk of Bias; GI, glycemic index; LRB, Low Risk of Bias; URB, Unclear Risk of Bias

\*Within and between subgroup analyses could not be performed against HRB since no values for HRB subgroup.

\*\* no values for URB subgroup.

§Blinding of Participants, Personnel, and Outcome Assessors.

**Supplemental Figure S21: Continuous meta-regression for change in carbohydrate intake in the low-GI dietary pattern intervention arms by change in body weight (n=19)**

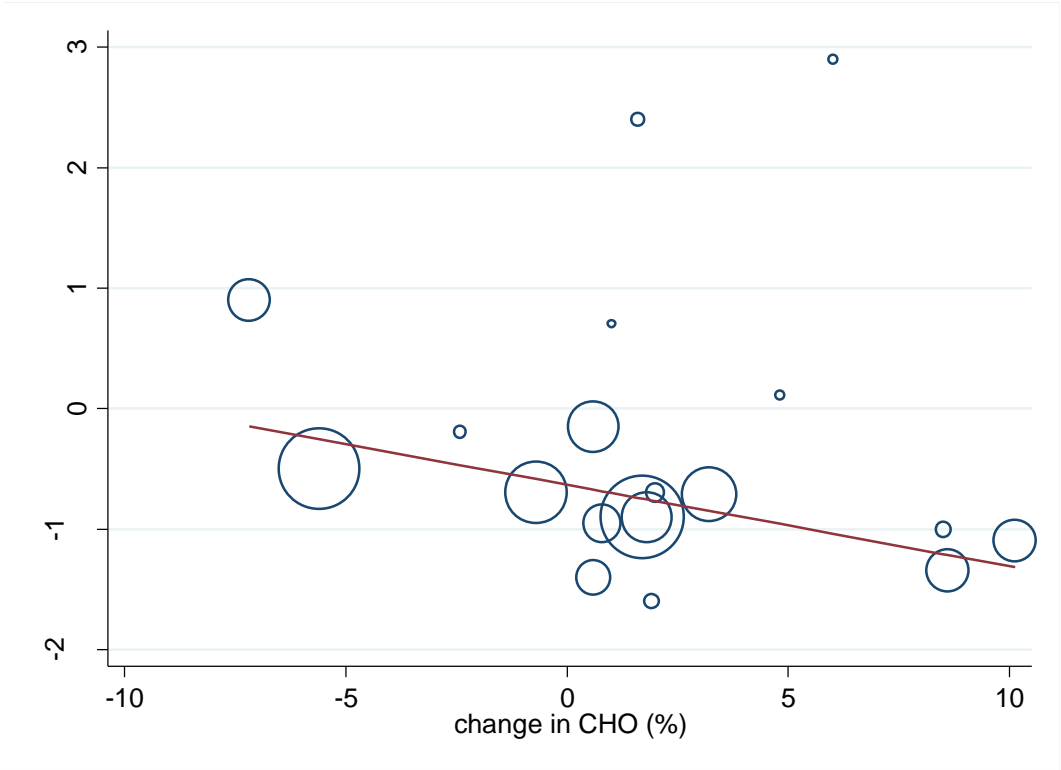

CHO, carbohydrate; MD, mean difference

**Supplemental Figure S22: Continuous meta-regression for change in protein intake in the low-GI dietary pattern intervention arms by change in body weight (n=19)**

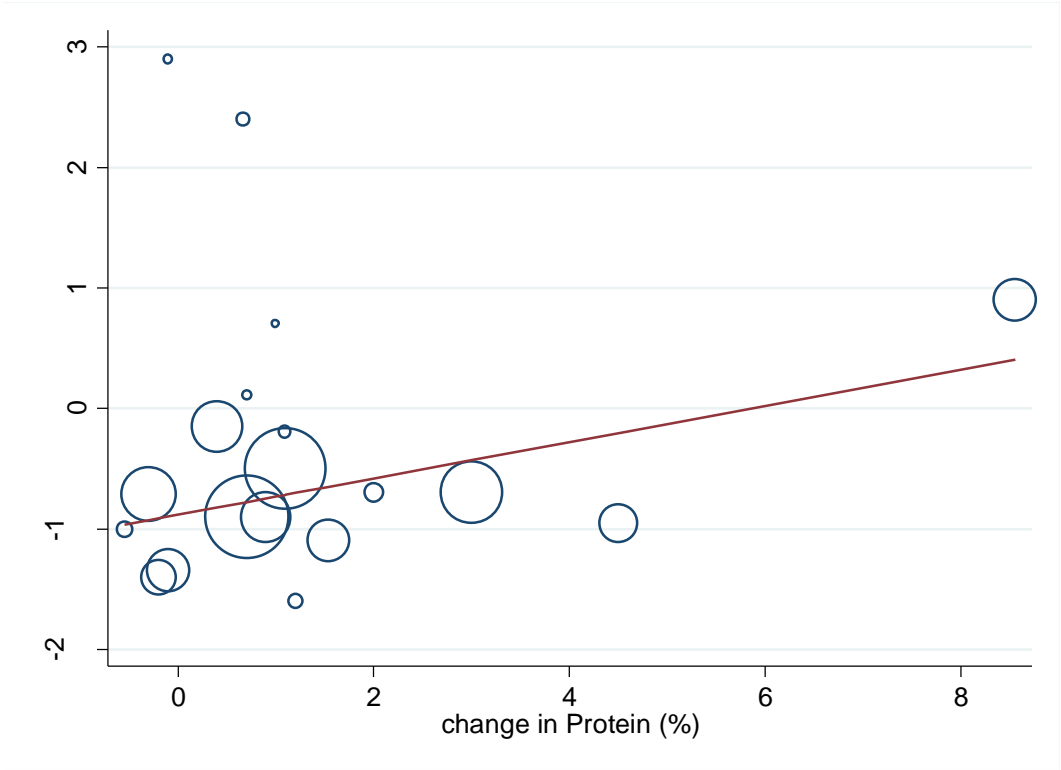

MD, mean difference

**Supplemental Figure S23: Pasta intake dose-response analyses by spline curve modeling (MKSPLINE procedure)**

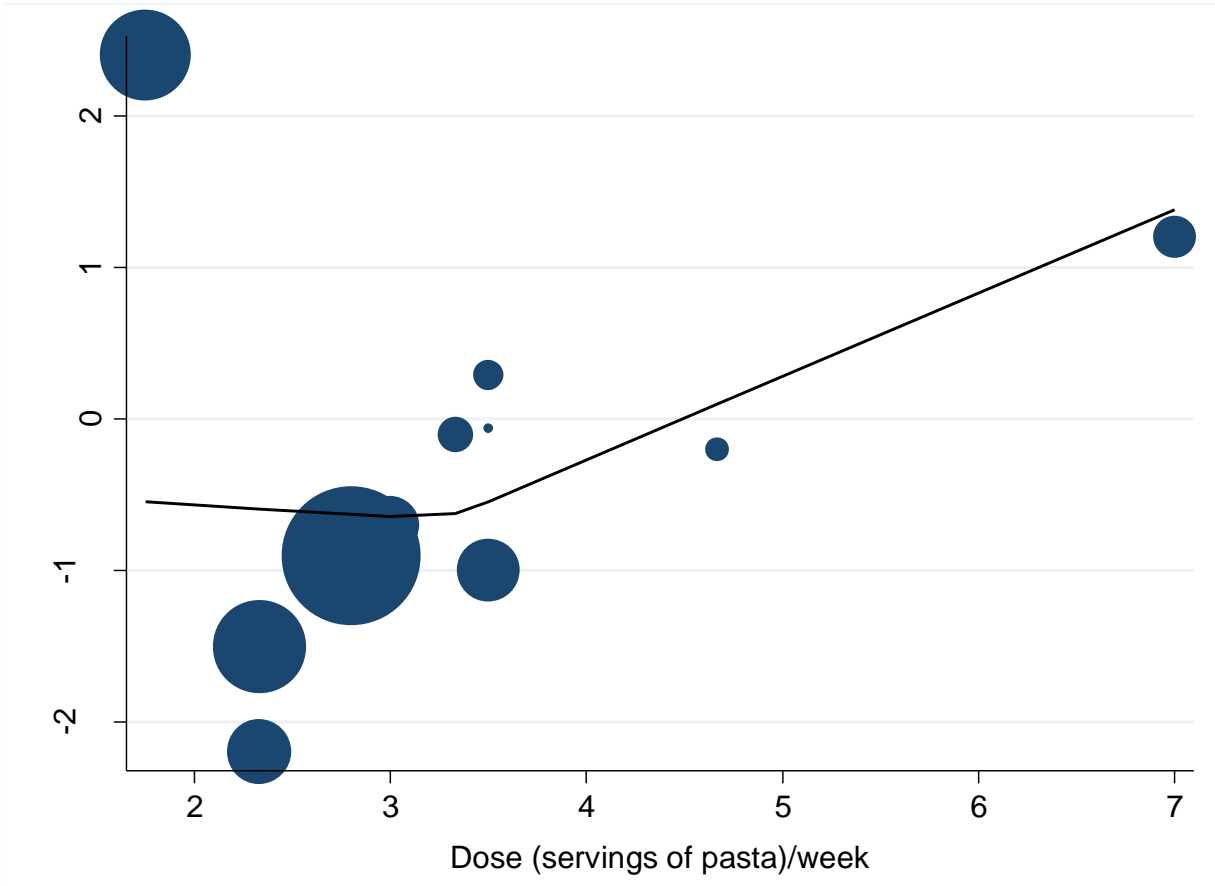

**Supplemental Figure S24: Funnel plot for the effect of pasta in the context of low-GI dietary patterns on body weight (kg)**

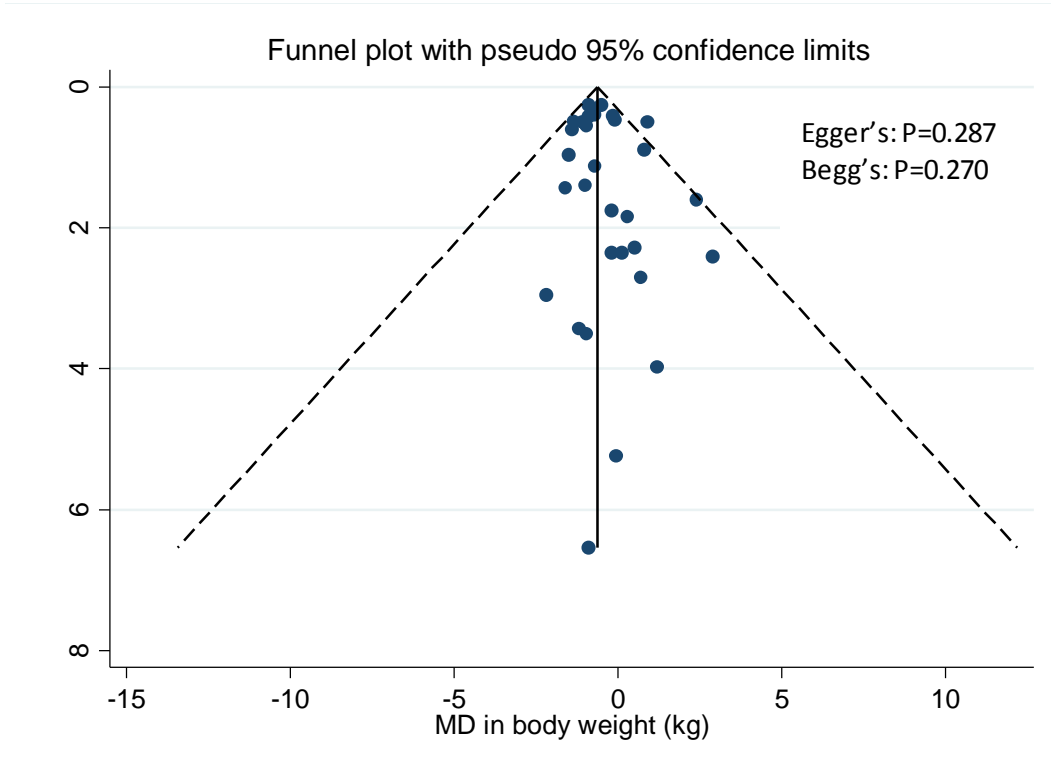

The solid line represents the overall pooled estimate for all studies included in the meta-analysis expressed as a weighted mean difference. Dashed lines represent 95% CIs. P values are derived from the quantitative assessment of publication bias by the Egger and Begg tests.



**Supplemental Figure S25: Funnel plot for the effect of pasta in the context of low-GI dietary patterns on BMI (kg/m<sup>2</sup>).**

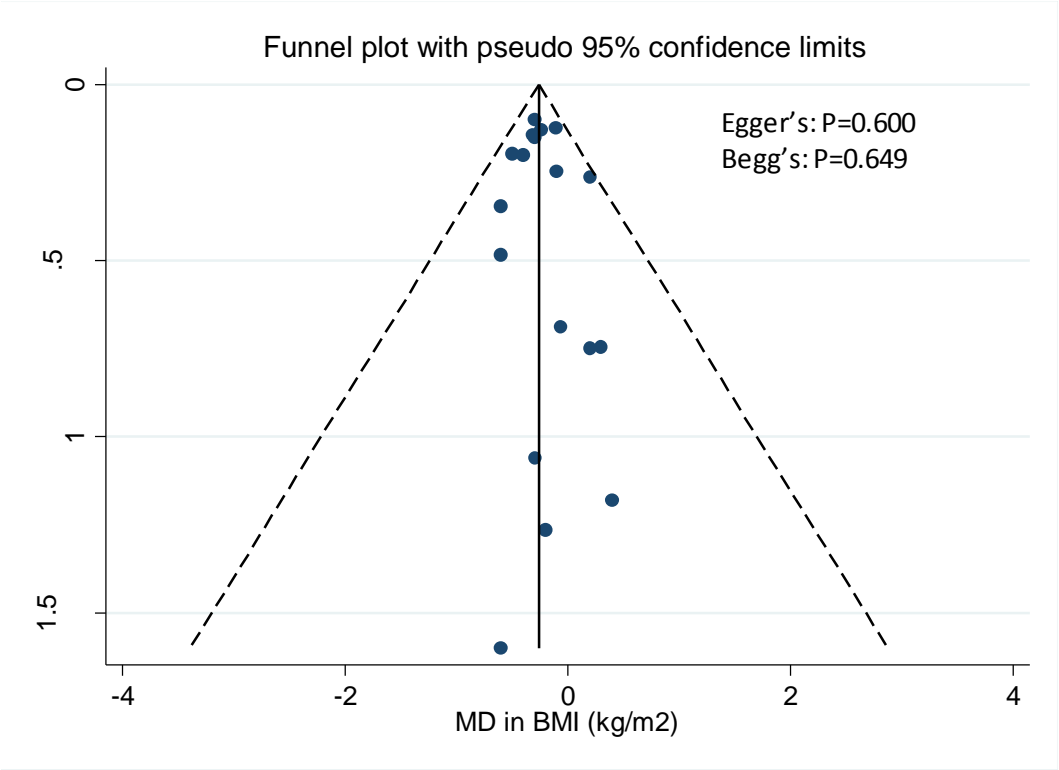

The solid line represents the overall pooled estimate for all studies included in the meta-analysis expressed as a weighted mean difference. Dashed lines represent 95% CIs. P values are derived from the quantitative assessment of publication bias by the Egger and Begg tests.

**Supplemental Figure S26: Funnel plot for the effect of pasta in the context of low-GI dietary patterns on body fat (%).**

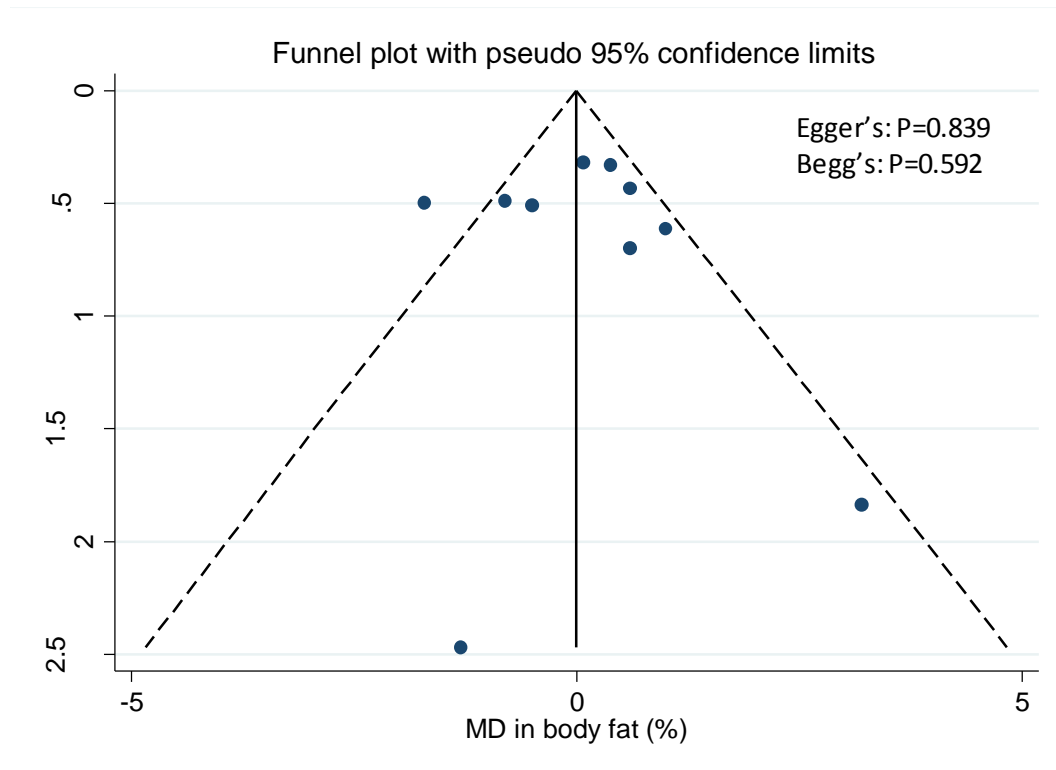

The solid line represents the overall pooled estimate for all studies included in the meta-analysis expressed as a weighted mean difference. Dashed lines represent 95% CIs. P values are derived from the quantitative assessment of publication bias by the Egger and Begg tests.

**Supplemental Figure S27: Funnel plot for the effect of pasta in the context of low-GI dietary patterns on waist circumference (cm).**

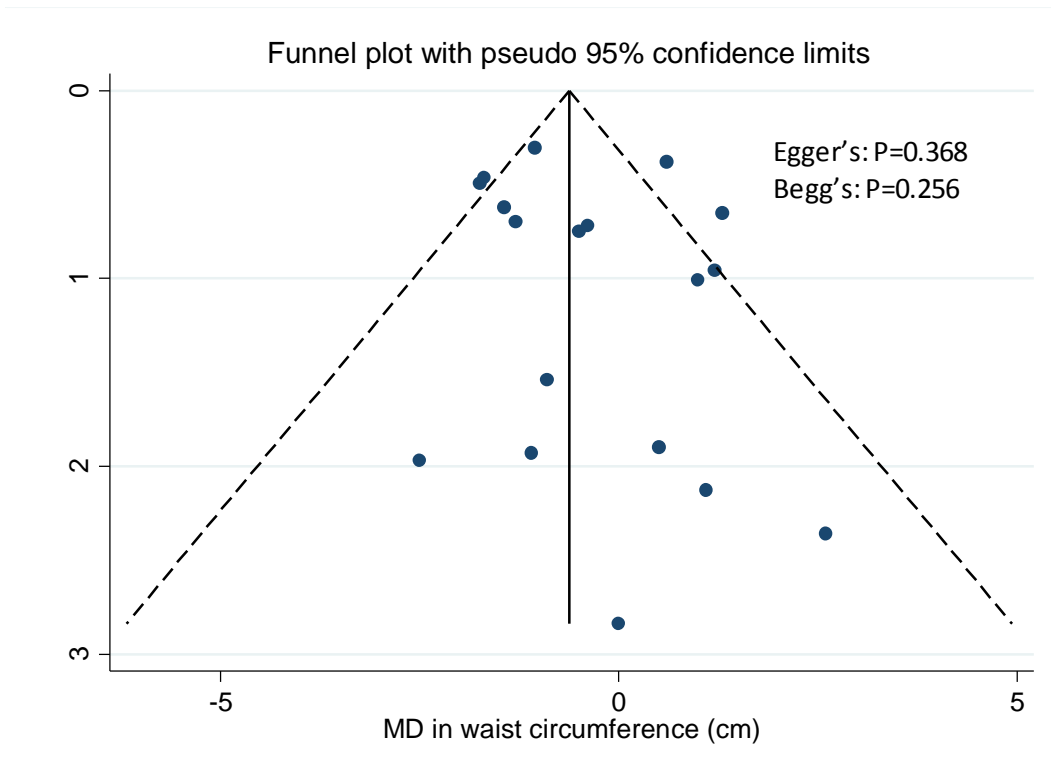

The solid line represents the overall pooled estimate for all studies included in the meta-analysis expressed as a weighted mean difference. Dashed lines represent 95% CIs. P values are derived from the quantitative assessment of publication bias by the Egger and Begg tests.
